# Supplementary material for: A genetic compensatory mechanism regulated by Jun and Mef2d modulates the expression of distinct class IIa Hdacs to ensure peripheral nerve myelination and repair
Source: eLife journal article supplement (doi:10.7554/elife.72917), 2022-01-25

Figure 1

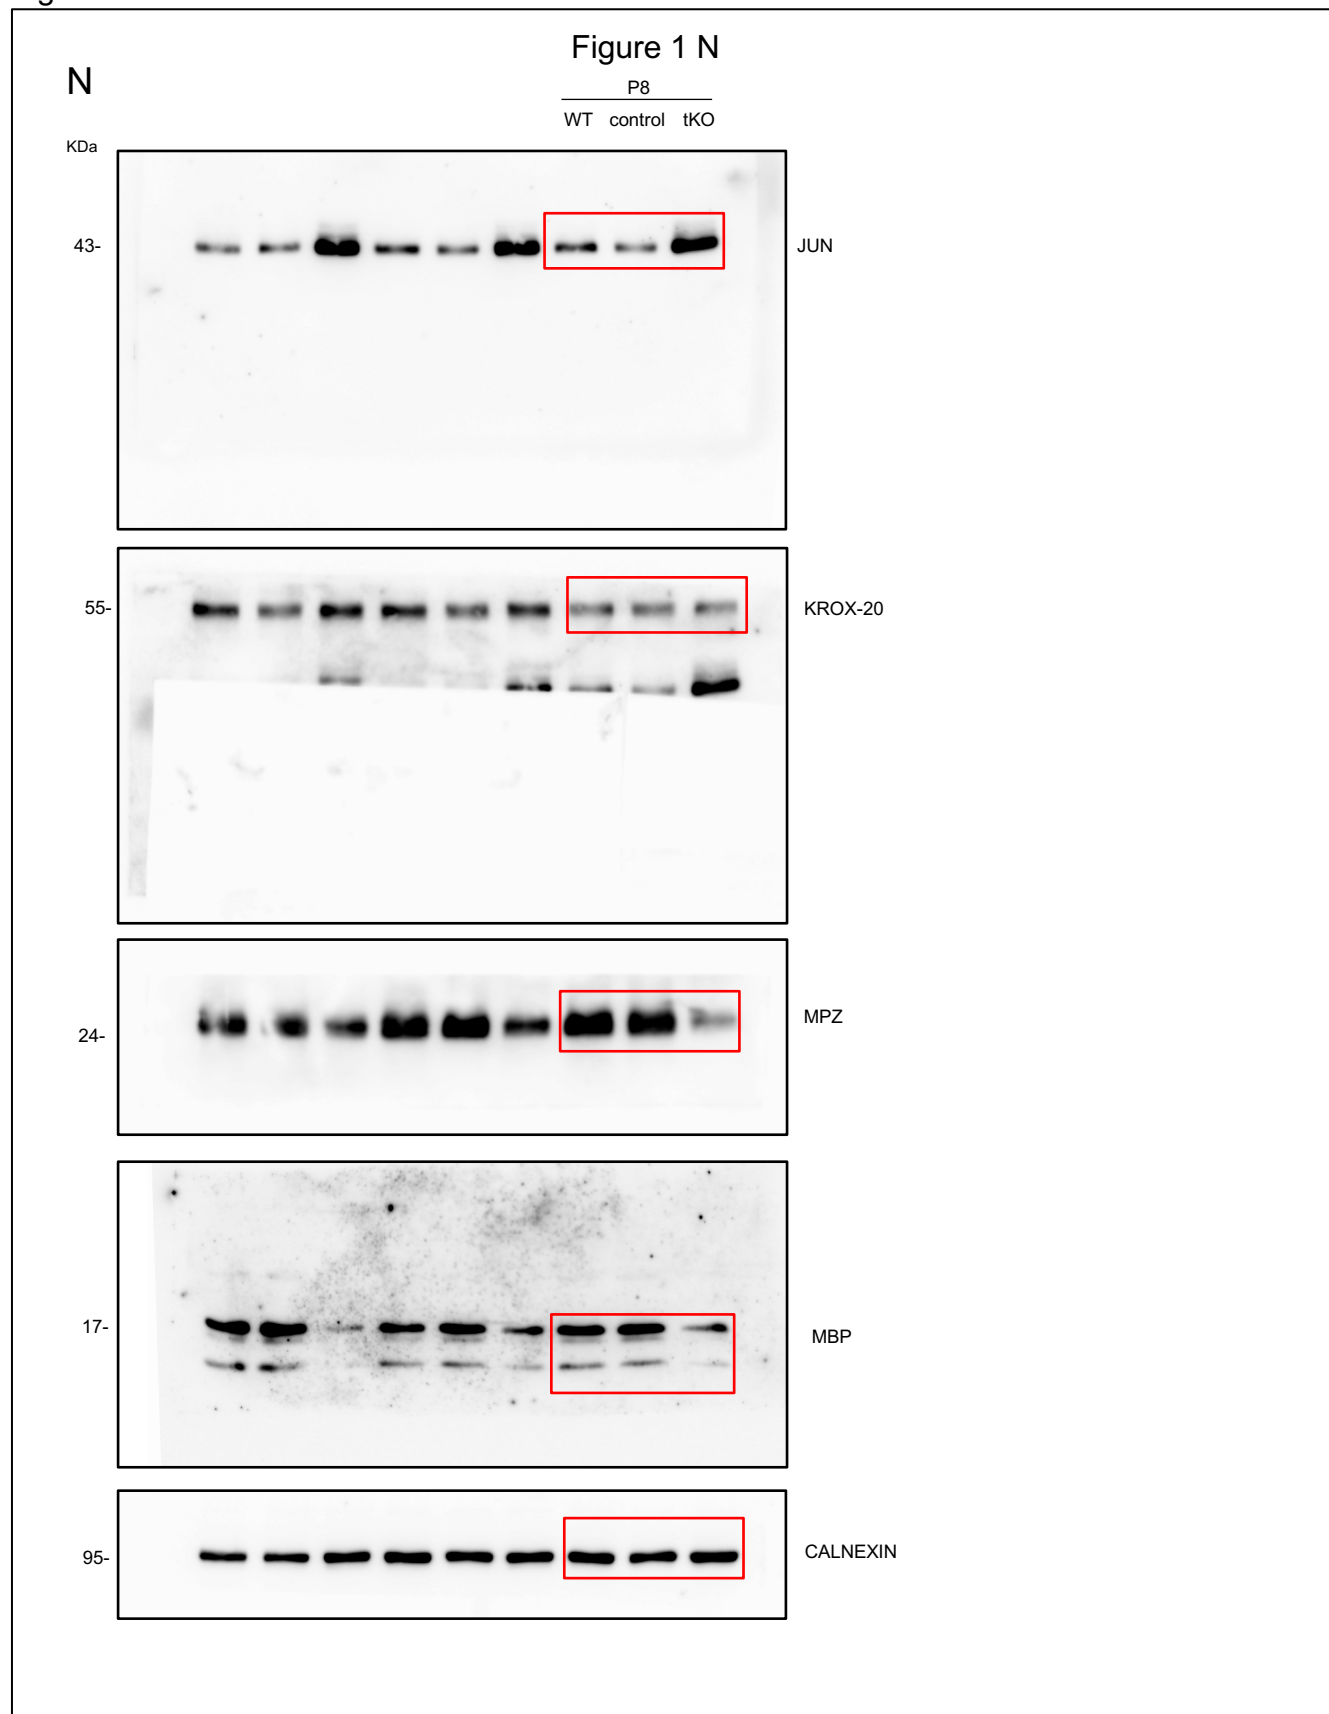

Figure 2

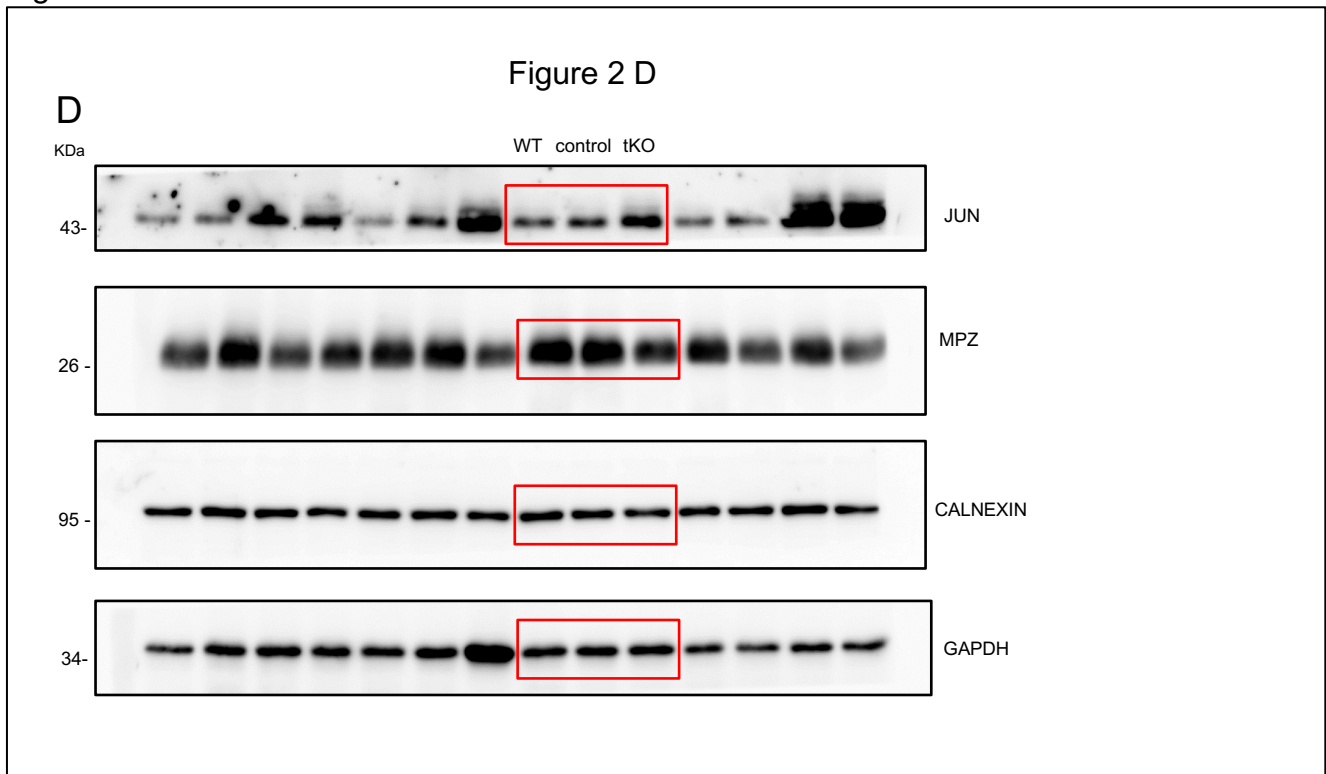

Figure 3

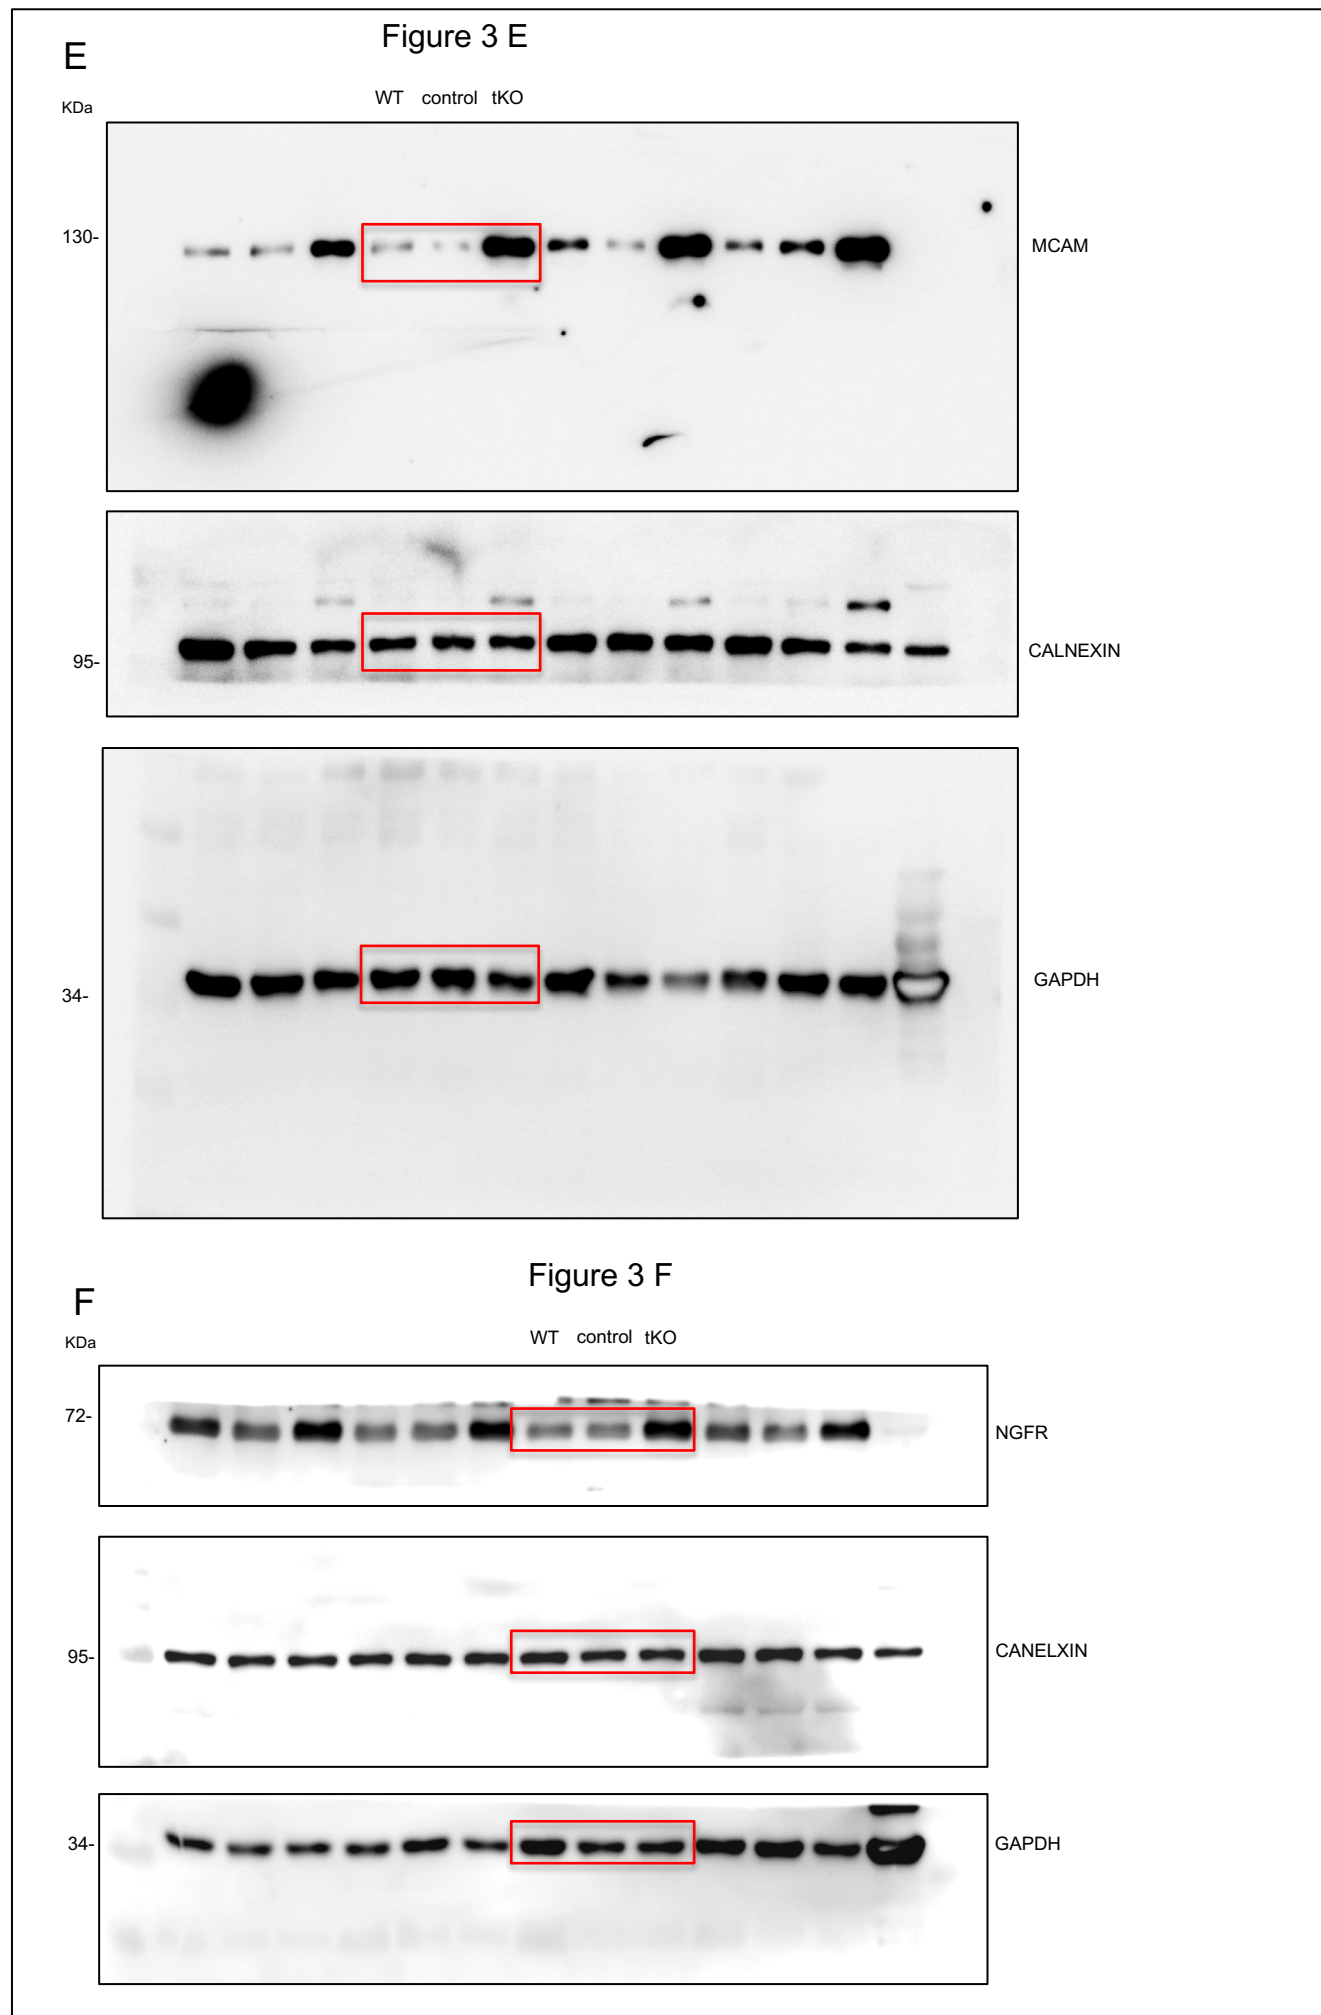

Figure 4

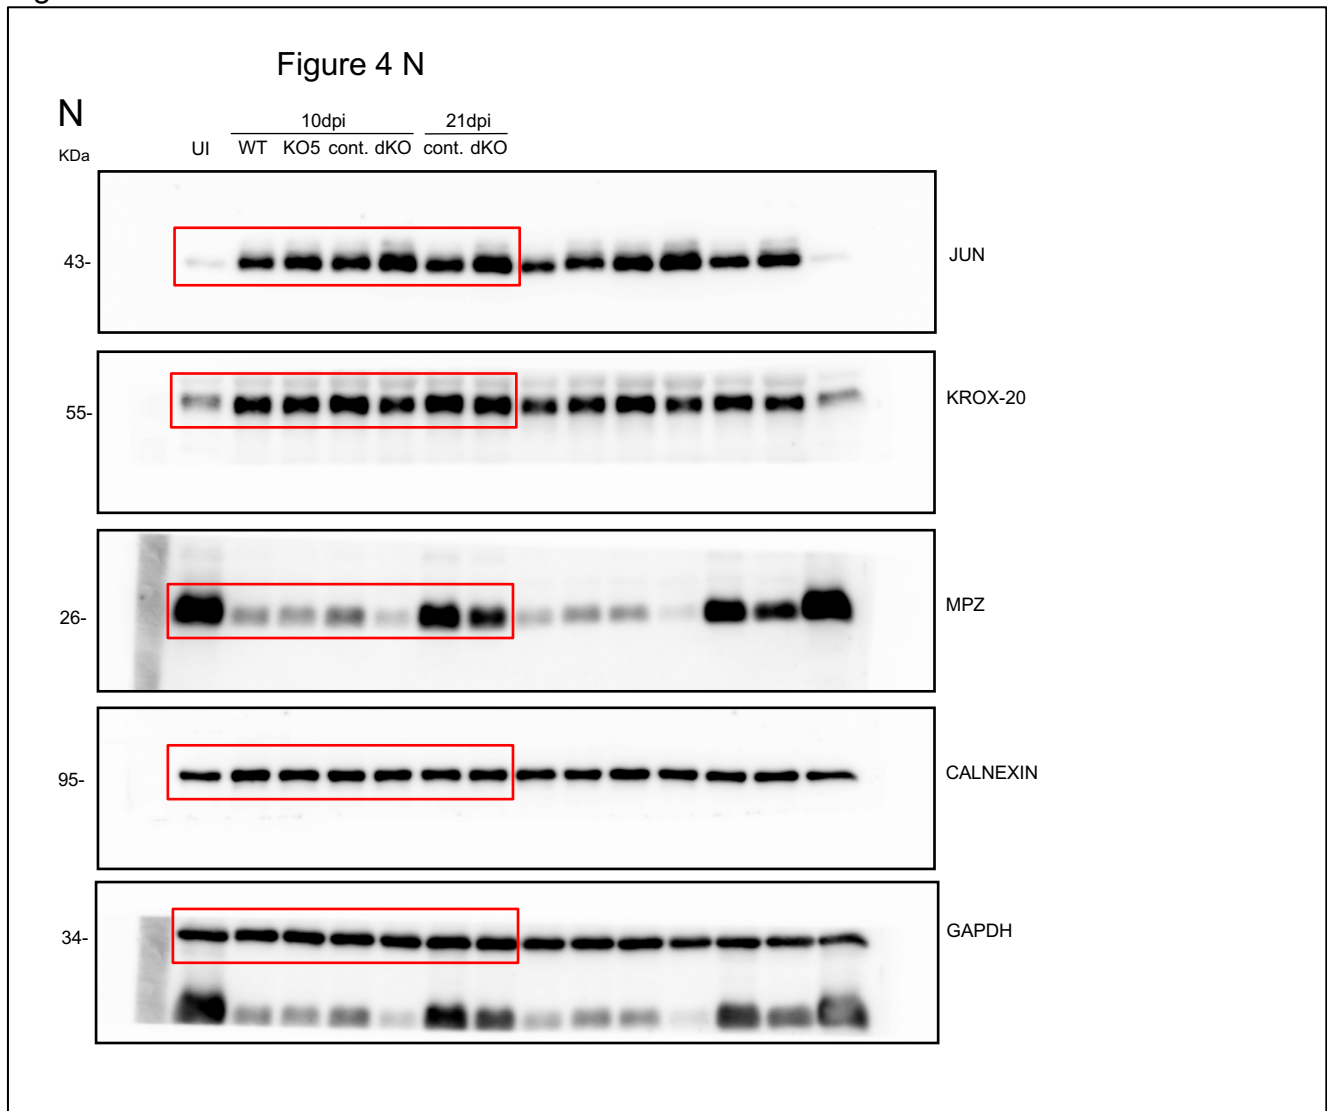

Figure 5

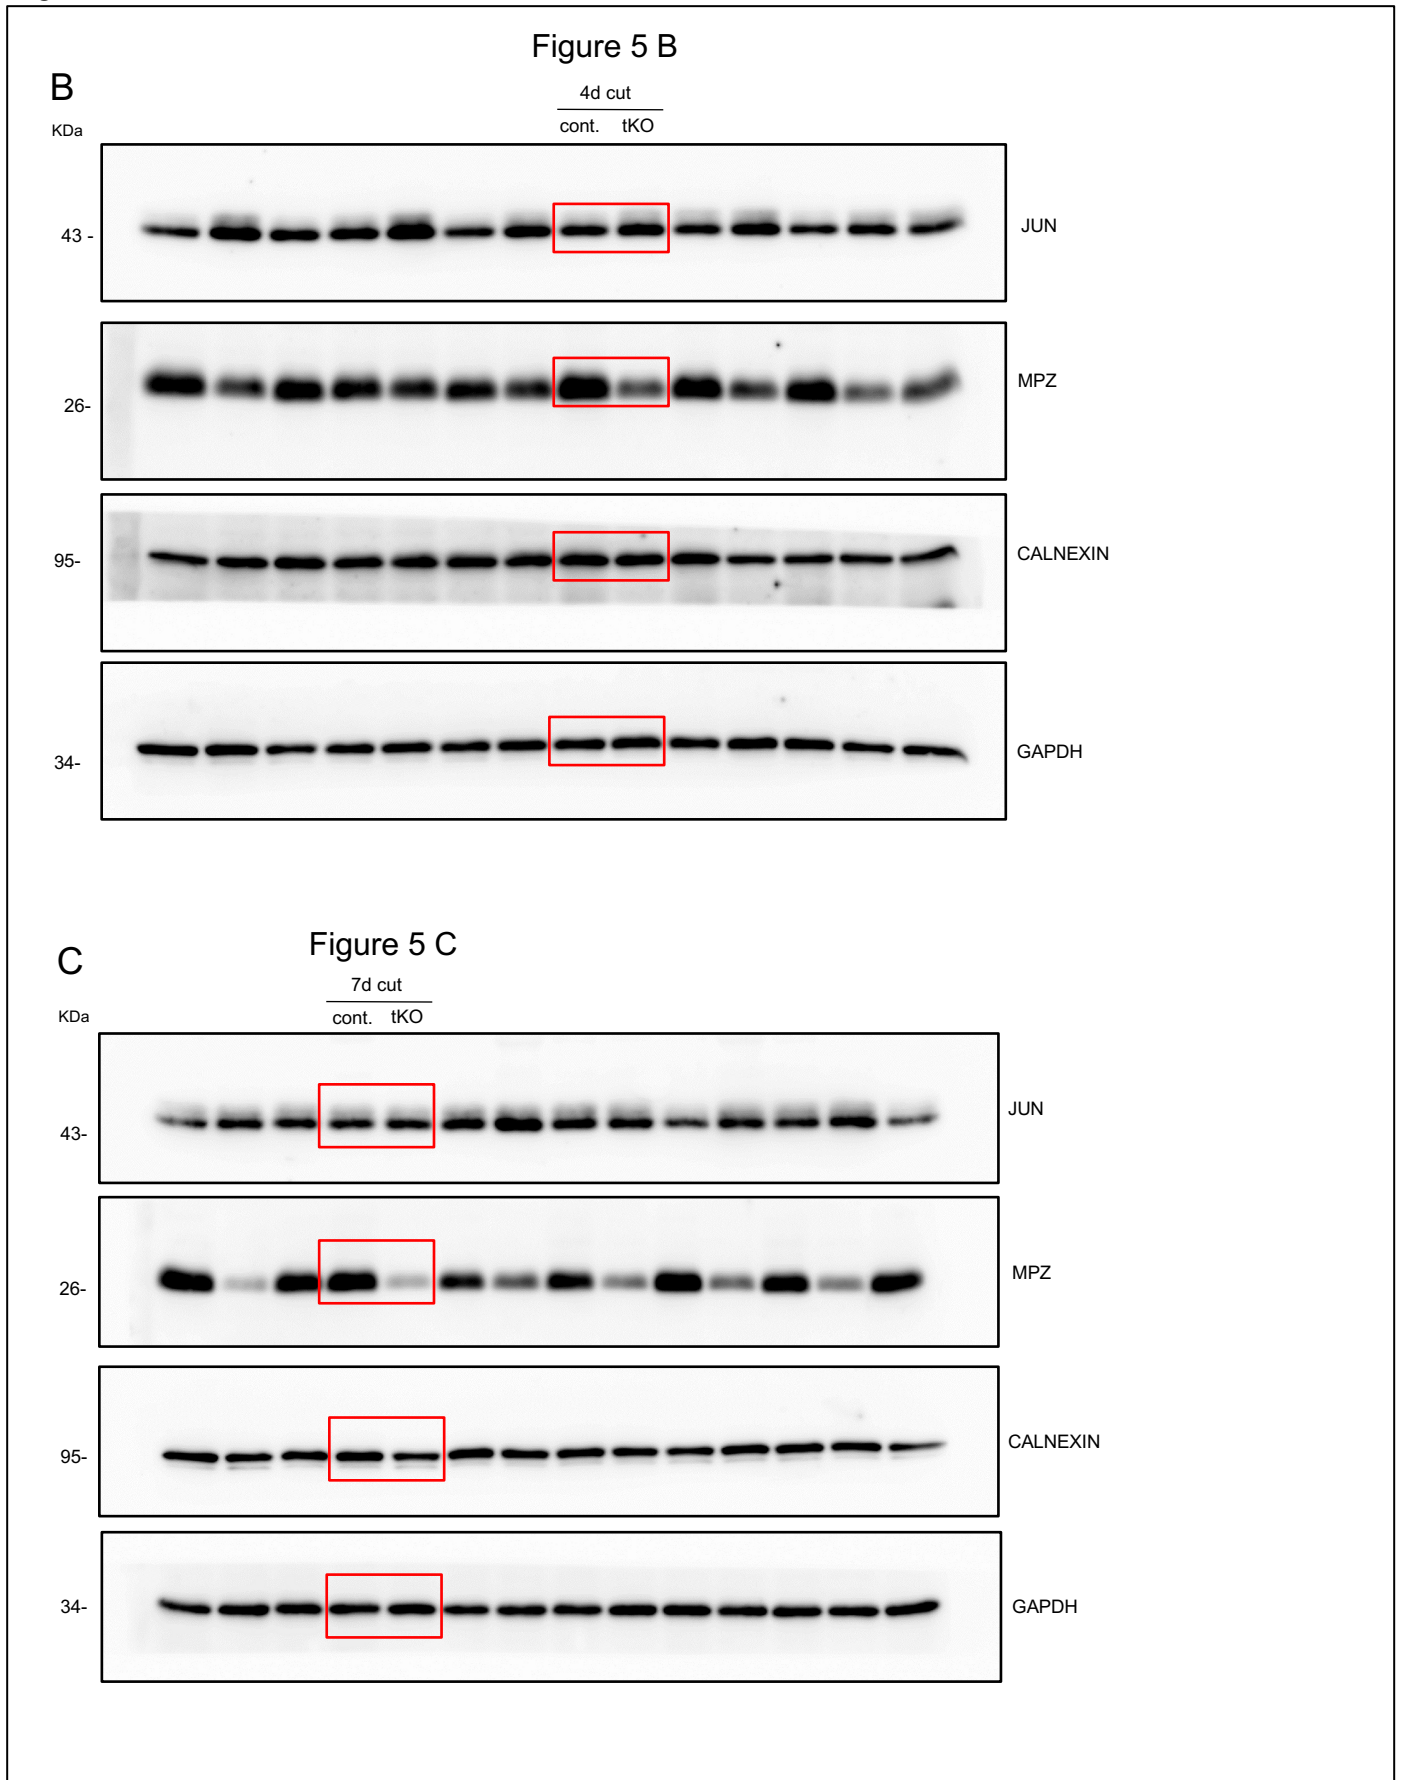

Figure 5

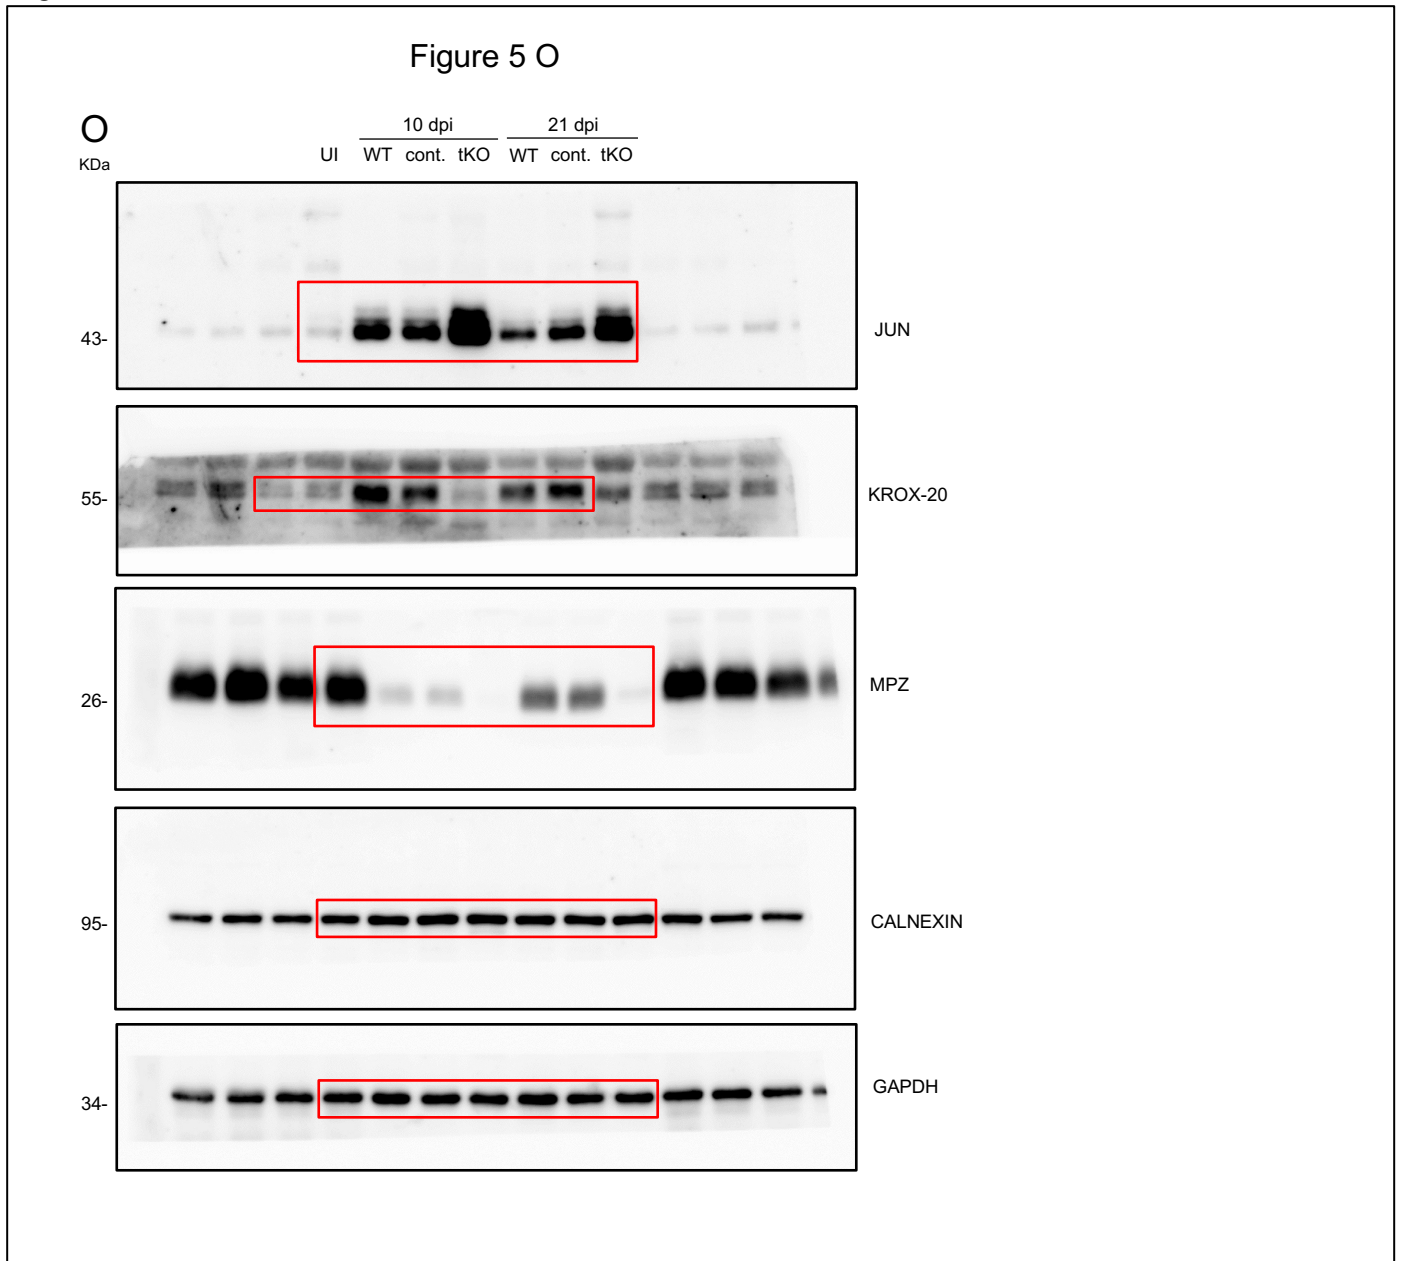

Figure 9

Figure 9 H

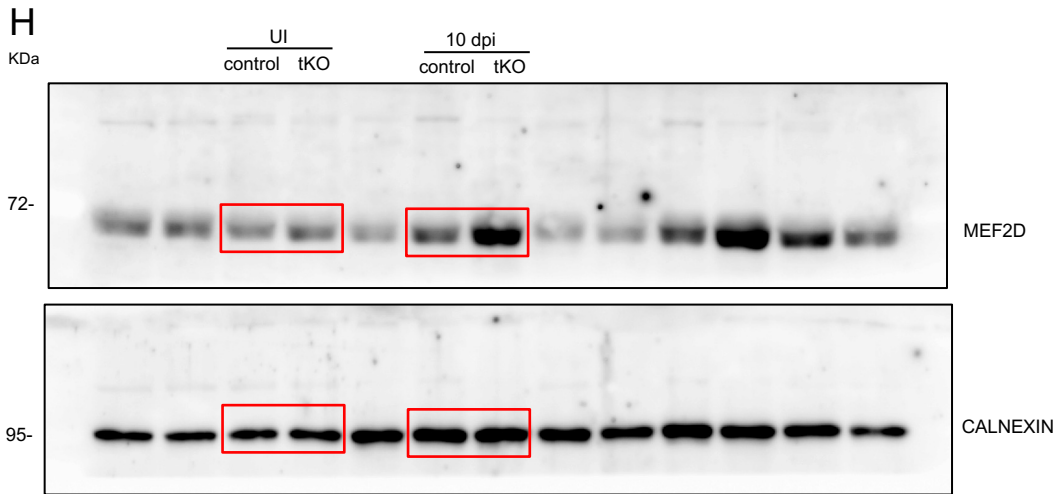

Figure 9 I

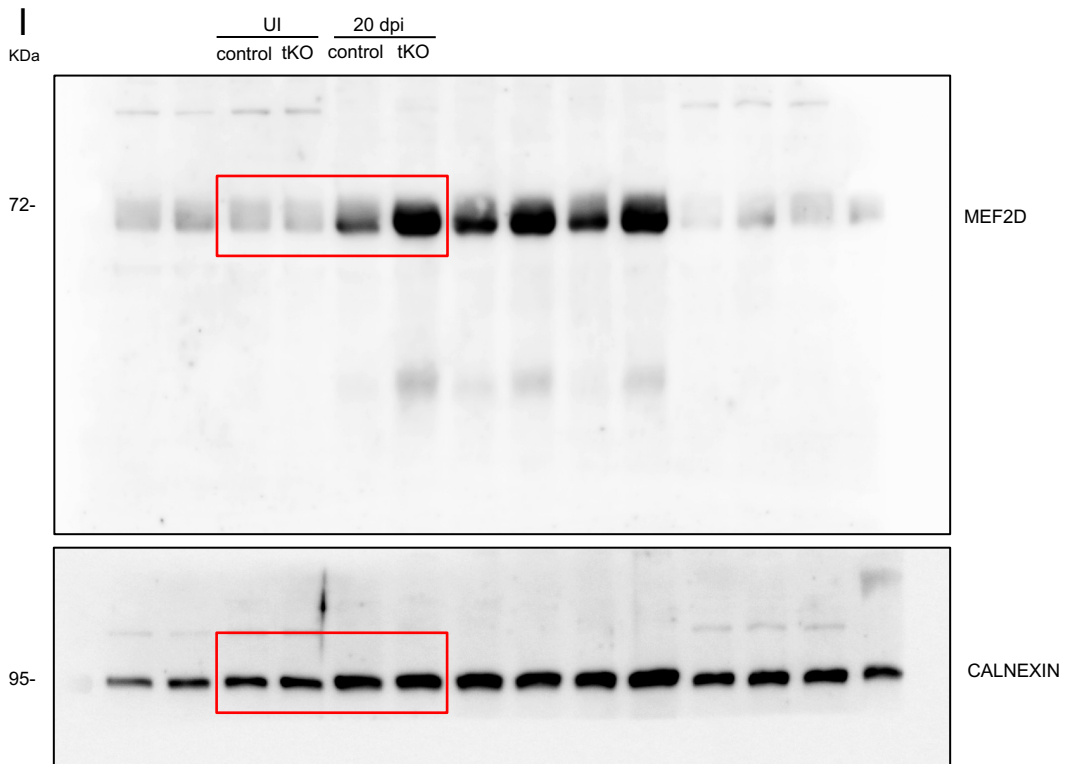

Figure 1 – figure supplement 1

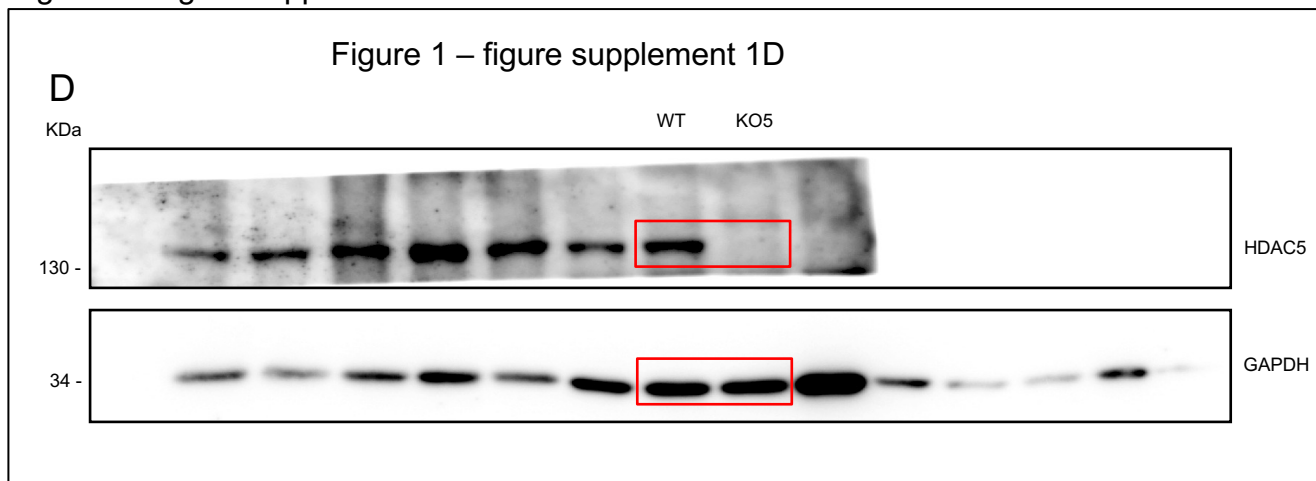



Figure 2 – figure supplement 1

Figure 2 – figure supplement 1C

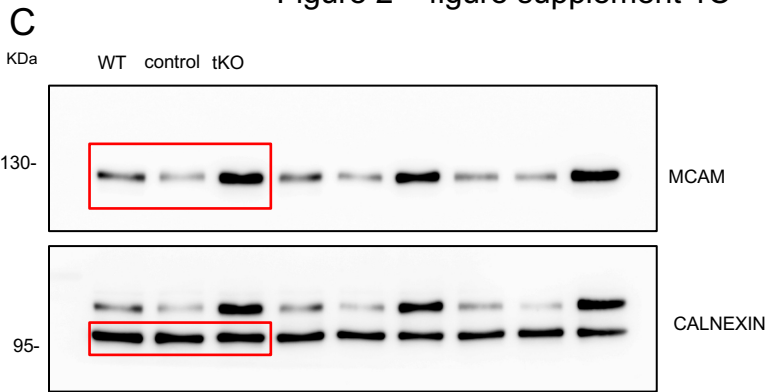

Figure 2 – figure supplement 1D

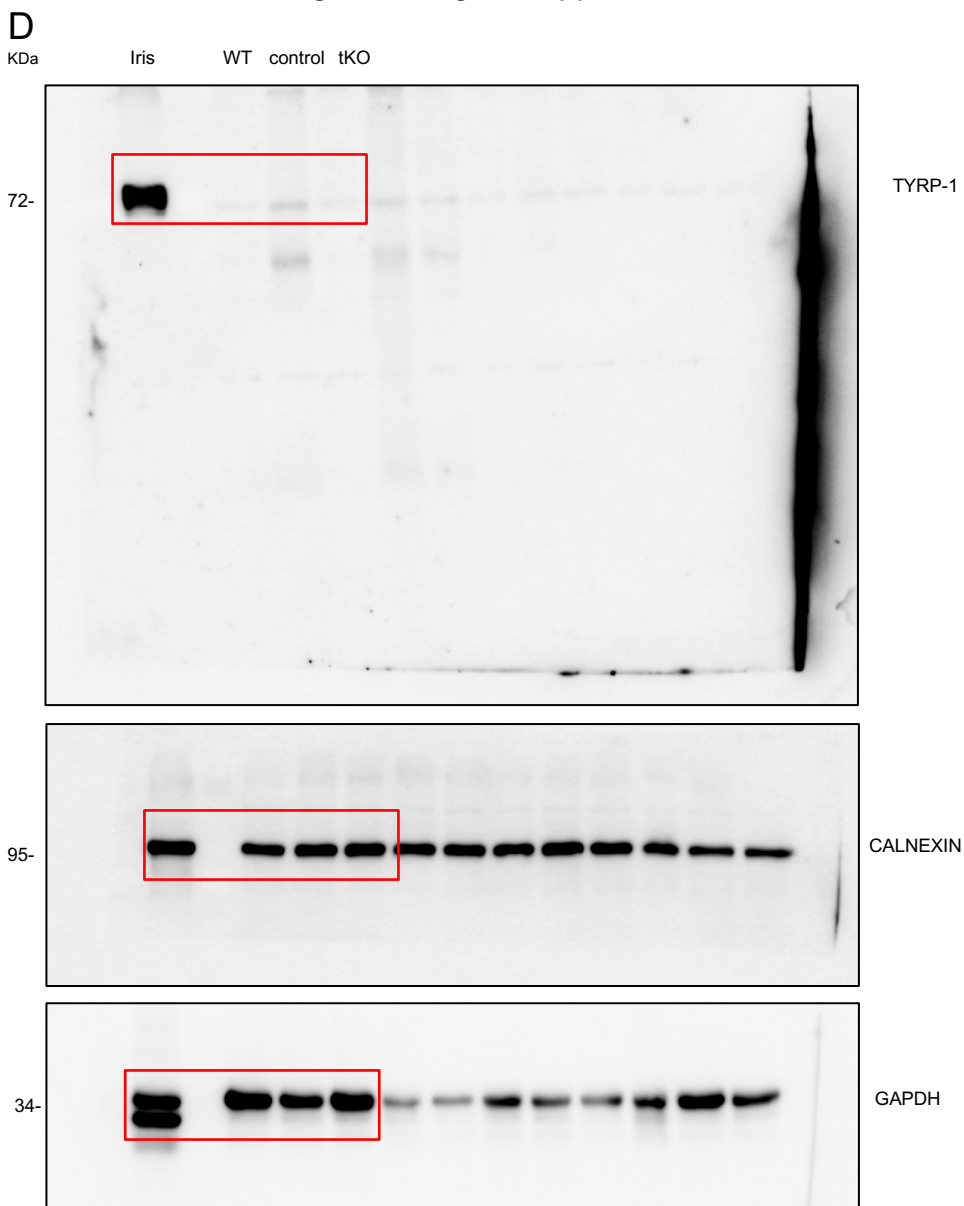

Figure 4 – figure supplement 1

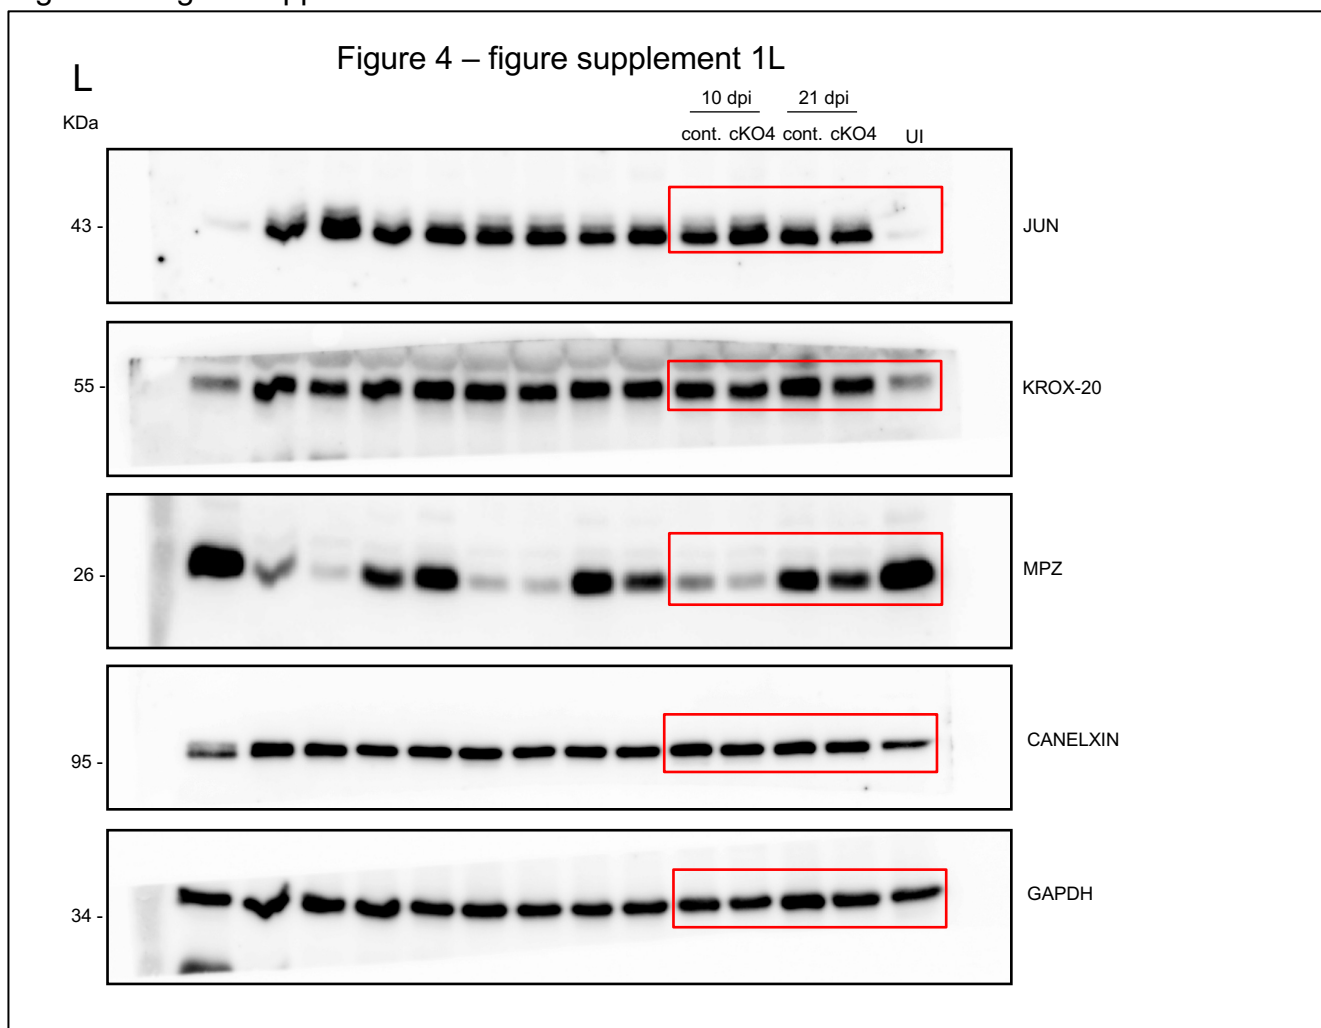

Figure 4 – figure supplement 3

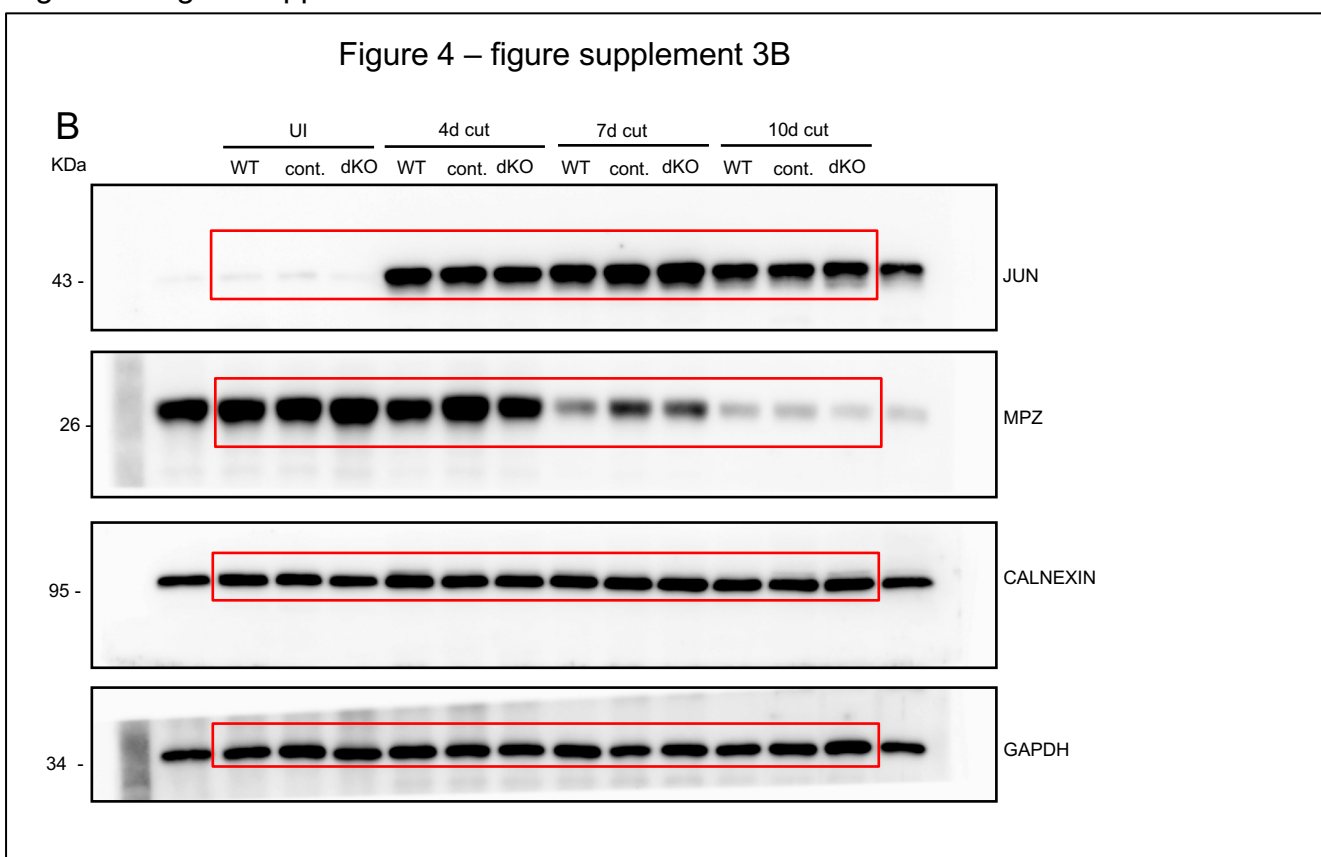

Figure 5 – figure supplement 1

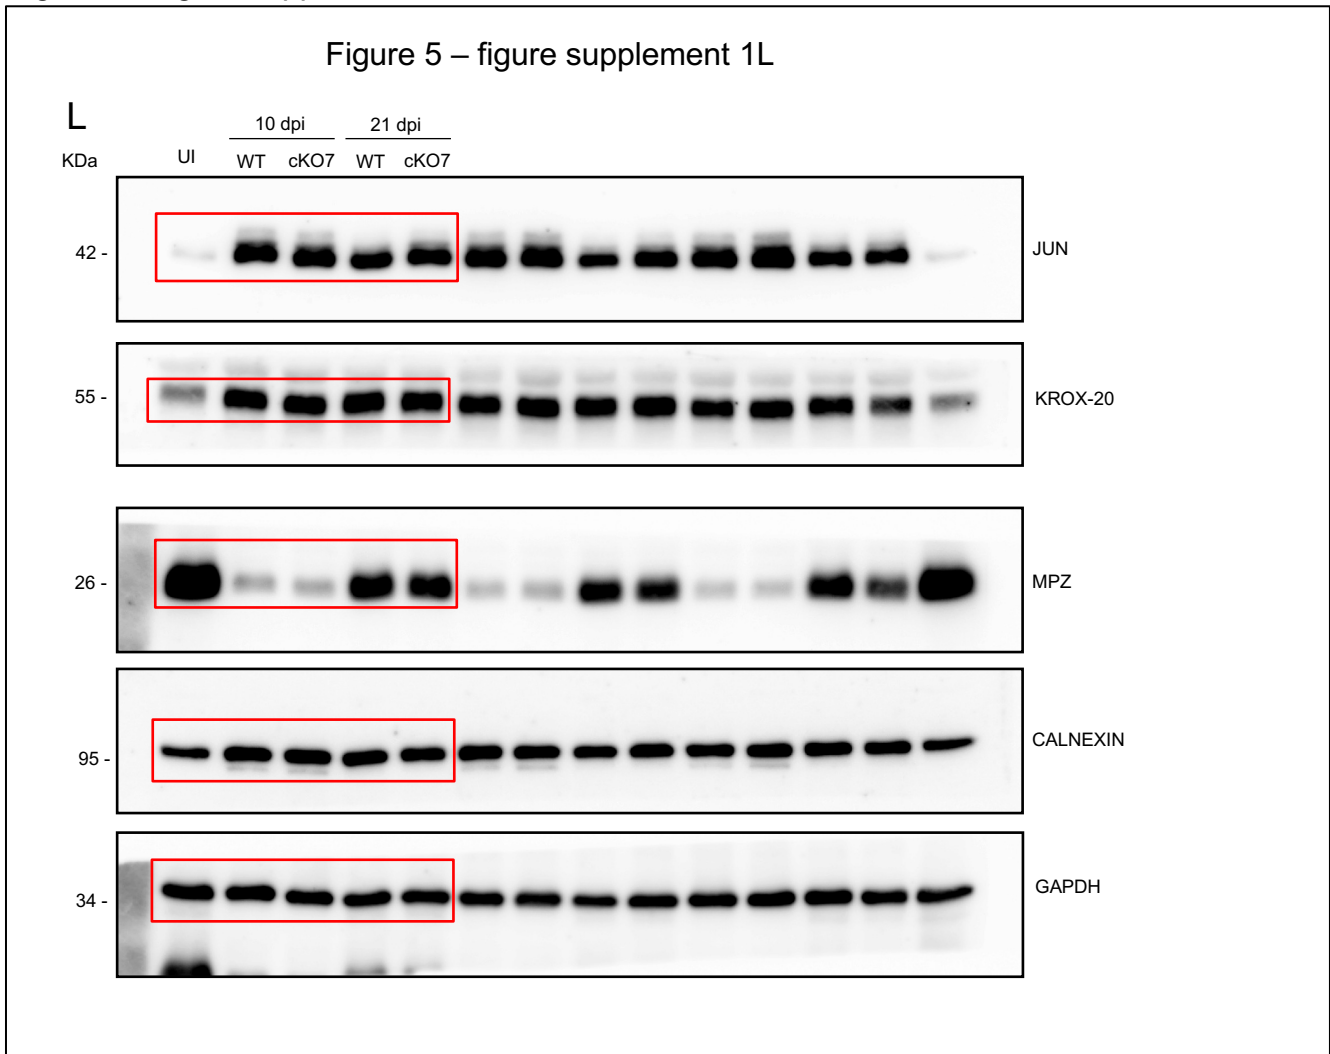

Figure 5 – figure supplement 2

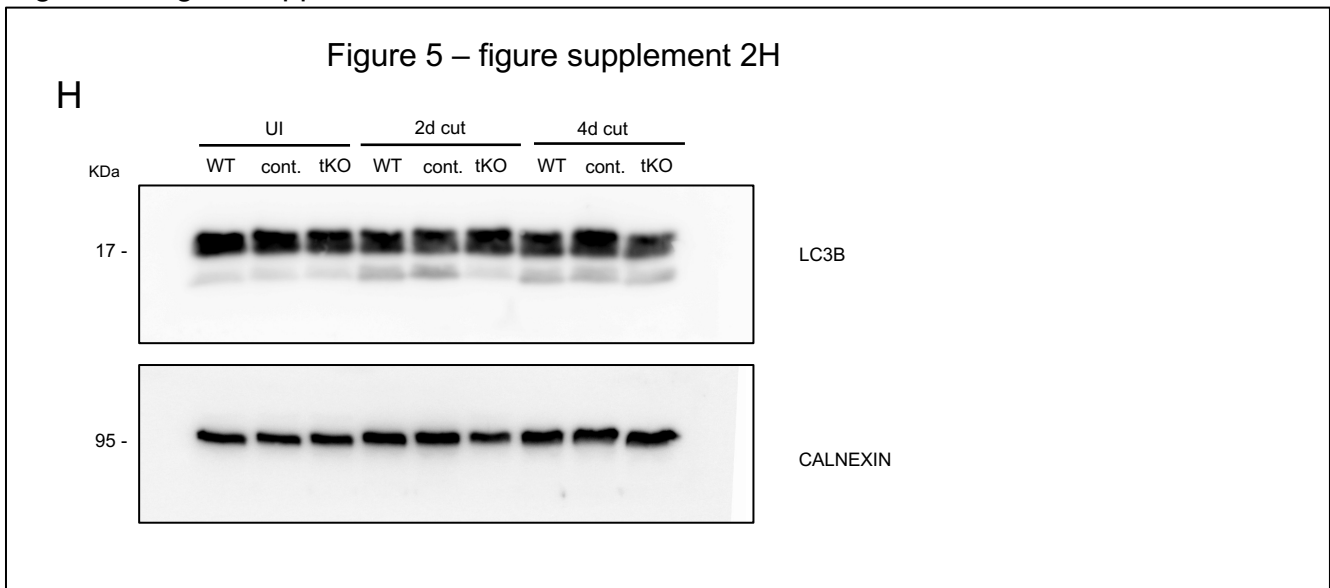

Supplement: supp [file elife-72917-supp-v1.zip]
