# Supplementary material for: A genetic compensatory mechanism regulated by Jun and Mef2d modulates the expression of distinct class IIa Hdacs to ensure peripheral nerve myelination and repair
Source: eLife. 2022 Jan 25;11:e72917. doi: 10.7554/eLife.72917 (PMC8853665; doi:10.7554/eLife.72917)
Supplement: Source data 2. [file elife-72917-data2.xlsx]

## Sheet: Hoja1
Gene	uninjured control	uninjured control	uninjured control	1 dpi control	1 dpi control	1 dpi control	10 dpi control	10 dpi control	10 dpi control	20 dpi control	20 dpi control	20 dpi control		uninjured triple KO	uninjured triple KO	uninjured triple KO	1 dpi triple KO	1 dpi triple KO	1 dpi triple KO	10 dpi triple KO	10 dpi triple KO	10 dpi triple KO	20 dpi triple KO	20 dpi triple KO	20 dpi triple KO
	HC-1_31478_ACAGTG	HC-2_31479_GCCAAT	HC-3_31480_CTTGTA	sample11_R1	sample13_R1	sample15_R1	sample3_R1	sample4_R1	sample7_R1	HC-7_31484b_CGATGT	HC-8_31485b_TGACCA	HC-9_31486b_CAGATC		HC-4_31481_AGTTCC	HC-5_31482_GTGAAA	HC-6_31483_GAGTGG	sample10_R1	sample12_R1	sample14_R1	sample1_R1	sample2_R1	sample8_R1	HC-10_31487b_ATGTCA	HC-11_31488b_CCGTCC	HC-12_31489b_GTTTCG
	FPKM	FPKM	FPKM	FPKM	FPKM	FPKM	FPKM	FPKM	FPKM	FPKM	FPKM	FPKM		FPKM	FPKM	FPKM	FPKM	FPKM	FPKM	FPKM	FPKM	FPKM	FPKM	FPKM	FPKM
ENSMUSG00000102693	0	0	0	0	0	0	0	0	0	0	0	0		0	0	0	0	0	0	0	0	0	0	0	0
ENSMUSG00000064842	0	0	0	0	0	0	0	0	0	0	0	0		0	0	0	0	0	0	0	0	0	0	0	0
ENSMUSG00000051951	4.71723	4.53548	4.5798	5.20075	4.86906	6.73925	9.84524	8.57573	6.48086	7.55718	6.26489	7.76818		4.09048	4.68417	4.76697	6.03173	5.40149	5.11745	3.79164	4.65431	4.86639	6.33763	5.5535	5.48071
ENSMUSG00000102851	0	0	0.225366	0	0	0.106817	0	0	0	0	0	0		0	0	0	0	0	0	0	0	0	0	0	0
ENSMUSG00000103377	2.85232	2.7384	2.89722	3.65211	3.17414	3.87405	6.72192	5.34769	3.7789	4.80495	3.80308	5.06555		2.71467	3.20726	3.0834	3.52	3.67741	3.68114	1.90852	2.94642	2.99967	4.24007	3.45297	4.21893
ENSMUSG00000104017	1.90633	2.36915	2.66442	2.75727	2.23385	2.96198	4.48576	4.95078	3.85707	4.01697	2.98736	4.03039		2.19232	2.67382	2.07433	3.03417	2.72804	2.96835	2.51082	2.8655	2.72014	3.68363	3.92609	4.13945
ENSMUSG00000103025	1.02422	1.49628	1.10096	1.37697	1.02449	1.04365	2.30322	2.39392	1.49695	1.90327	1.59928	1.74099		0.828568	0.886564	0.891579	1.34008	1.15713	1.69415	0.981082	1.09249	1.00582	1.53071	1.2284	1.36109
ENSMUSG00000089699	64.7461	68.8821	53.6551	24.0223	29.6206	47.3754	3.92407	5.36005	3.85311	16.6154	17.3917	21.8397		47.4915	48.4475	44.3755	24.1137	25.4356	29.9904	3.17145	0.492205	1.66739	1.54229	2.83637	6.65524
ENSMUSG00000103201	2.24828	2.70308	2.26133	2.69878	1.89999	2.96616	5.04527	4.83151	4.04935	4.56553	3.21401	4.46274		2.02428	2.26679	2.44641	2.2823	2.18213	3.14309	1.92723	2.51247	2.83708	3.03035	3.38454	3.1755
ENSMUSG00000103147	1.81611	1.34083	1.51866	0.490501	0.333205	0.332217	0.0557586	0.180887	0.122383	0.715126	0.643202	0.583144		1.21532	1.04393	1.42036	0.115224	0.403945	0.117345	0.183476	0	0	0.138795	0.208843	0.0665471
ENSMUSG00000103161	2.47763	2.6167	2.63974	2.98245	2.9366	3.52368	6.20549	5.78359	3.81895	4.63697	3.67804	4.92024		2.78359	2.71856	2.62002	3.02877	2.80309	4.02248	2.18108	2.59421	3.20288	3.69102	3.46713	3.64171
ENSMUSG00000102331	3.06388	3.41223	2.93757	3.08161	3.02962	3.42968	7.85814	7.00707	5.2508	6.64996	4.87961	5.98334		2.72801	3.47216	3.50935	3.4049	3.722	4.3011	2.64137	4.13443	3.41694	5.30424	4.68786	5.162
ENSMUSG00000102348	0.2573	0.198223	0.198609	0.0308856	0.0629433	0.156891	0	0	0	0.073685	0.0364507	0.0367191		0.20662	0.2088	0.0349969	0	0	0	0	0	0	0.0393281	0	0
ENSMUSG00000102592	0.0670612	0.0918466	0.0230063	0	0	0	0	0	0	0	0	0.0255207		0	0.0483737	0.0486473	0	0	0	0	0	0	0	0	0
ENSMUSG00000088333	0	0	0	0	0	0	0	0	0	0	0	0		0	0	0	0	0	0	0	0	0	0	0	0
ENSMUSG00000102343	0.038529	0	0.0396538	0.0369994	0	0.0375895	0	0.0818678	0	0.0441354	0.043666	0		0.0412533	0	0.0419244	0.0782241	0.0391761	0.0398318	0	0	0.0436582	0	0	0.0451779
ENSMUSG00000025900	0.341507	0.324485	0.329509	0.176272	0.192148	0.241555	0.134208	0.158735	0.165696	0.288509	0.212871	0.22906		0.233104	0.244802	0.329797	0.186337	0.16494	0.198593	0.0460019	0.114945	0.082231	0.161817	0.115197	0.180198
ENSMUSG00000102948	0	0	0	0.0270311	0	0.0274623	0.0276553	0	0	0.0322446	0	0.0321366		0.030139	0	0	0	0	0	0	0.0659086	0	0	0	0
ENSMUSG00000104123	0	0	0	0	0	0	0	0	0	0	0.0401351	0		0.0379175	0	0	0	0.0360082	0	0	0	0	0	0	0
ENSMUSG00000025902	2.29069	2.07017	2.69759	1.68153	1.42248	2.62163	1.37412	1.57954	1.81674	1.66523	1.83474	1.65966		2.90073	2.76452	2.3847	1.59868	2.03801	2.29982	1.95818	2.12735	2.00912	1.45438	1.40489	1.22677
ENSMUSG00000104238	0.306277	0.203569	0.185423	0.121107	0.158664	0.140616	0.0531016	0.153127	0.155402	0.144465	0.142929	0.123413		0.154322	0.214431	0.29406	0.0914447	0.16487	0.0931274	0.0776592	0.337474	0.224562	0.110151	0.198892	0.147877
ENSMUSG00000102269	0.122994	0.306823	0.144668	0.067492	0.0859657	0.0685685	0.086313	0.168006	0.227336	0.140891	0.179219	0.100299		0.131691	0.190114	0.114714	0.0713458	0.0535969	0.127153	0.132541	0.0411405	0.139368	0.171881	0.0862093	0.0412053
ENSMUSG00000096126	0	0.504512	0	0	0	0.958357	0	0	0	0	0.55664	0		0	0.531432	1.06888	0	0.499403	0	0	0	0.55654	0	0	0
ENSMUSG00000103003	0	0	0	0	0	0	0	0	0.125919	0	0	0		0	0	0	0	0	0	0	0	0	0	0	0
ENSMUSG00000104328	0.0189519	0.0194673	0.0390103	0.0545984	0.0185448	0.0369795	0.0186197	0.0201348	0	0.0868383	0.0429574	0.0216369		0	0	0.0412441	0	0.0578105	0	0.040846	0.0443748	0	0.0463485	0.06974	0
ENSMUSG00000102735	0	0	0	0	0	0	0	0	0	0	0	0		0	0	0	0	0	0	0	0	0	0	0	0
ENSMUSG00000098104	0.250255	0.220338	0.33115	0.205988	0.314845	0.313911	0.280993	0.569733	0.385465	0.327622	0.364656	0.244894		0.191393	0.348142	0.194506	0.290334	0.254458	0.295676	0.346732	0.334834	0.24306	0.30601	0.263114	0.461121
ENSMUSG00000102175	0.305038	0.179048	0.224245	0.167387	0.383766	0.170057	0.256878	0.13889	0.0939691	0.19967	0.197547	0.248752		0.326606	0.188601	0.237085	0.0884724	0.221543	0.225251	0.281756	0.204065	0.345646	0.319712	0.374163	0.30658
ENSMUSG00000088000	0.510229	1.04821	0	0	0	0	0	0	0	1.16894	0	0		1.09261	0.55207	1.11039	0.51795	0	0.527481	1.6495	0	1.15631	0.623904	0	0.598278
ENSMUSG00000103265	0.416431	0.256654	0.0857176	0.239939	0.407486	0.0812553	0.327305	0.353939	0.0897994	0.763241	0.377562	0.380343		0.0891752	0.270348	0.362503	0.338186	0	0.172204	0.359004	0.58503	0.471868	1.01842	0.30648	0.585952
ENSMUSG00000103922	0.294969	0.454486	1.16372	0.283258	0.721581	0.431664	0.772796	0.67899	0.26503	0.281575	0.501445	1.12253		0.315825	0.425543	0.160481	0.249527	0.249935	0.152471	0.529775	0.460435	0.222824	0.4208	0.241208	0.345871
ENSMUSG00000033845	2.37163	2.14354	2.43449	3.25268	3.45376	3.03875	2.54907	2.36177	2.23663	2.17764	2.358	2.65107		2.56584	2.29811	2.15614	3.48242	3.87848	3.23282	2.52236	2.67503	2.46984	2.76372	2.94705	2.90433
ENSMUSG00000102275	0.685482	0.469416	0.564394	0.702151	1.34151	0.80252	0.718364	0.582614	1.084	1.15166	0.569709	0.730423		0.4893	0.642802	0.74589	0.695855	1.02226	0.992122	0.49246	0.749008	0.776736	0.670561	0.448438	0.857358
ENSMUSG00000025903	3.50848	3.51323	3.61847	5.88371	5.31161	4.80788	4.76218	4.61049	3.79078	3.50503	4.45974	4.22387		4.29208	3.30276	3.87369	5.27889	5.55676	5.42925	4.56551	4.95994	5.01735	4.05629	4.32159	5.054
ENSMUSG00000104217	0	0	0	0	0	0	0	0	0	0	0	0		0	0	0	0	0	0	0	0	0	0	0	0
ENSMUSG00000033813	3.20513	3.65015	3.54968	3.98116	3.78398	4.04467	3.11472	3.64576	3.38065	3.35224	3.55349	3.53989		3.15199	3.97685	3.65816	4.13776	4.2508	4.03382	3.3976	3.26288	3.59233	3.0246	3.41865	3.10462
ENSMUSG00000062588	0	0	0	0	0	0	0	0	0	0	0	0		0	0	0	0	0	0	0	0	0	0	0	0
ENSMUSG00000103280	0	0.0485894	0.0486839	0	0.0462869	0	0	0	0	0	0	0		0	0	0	0	0	0.0489024	0	0	0	0.0578417	0.0580225	0
ENSMUSG00000002459	0.0247953	0.0127348	0	0	0.0121313	0.0120953	0	0	0.0401015	0.0142016	0.0140506	0		0	0.0268286	0	0	0.0126058	0.0384505	0.02672	0.0145142	0.0280961	0.0454792	0.0456214	0.0436112
ENSMUSG00000091305	0	0	0	0	0	0	0	0	0	0	0	0		0.206873	0	0	0	0	0	0	0	0	0.236258	0	0
ENSMUSG00000102653	0	0	0.0506677	0.023638	0	0.024015	0	0	0	0	0.0278972	0		0.0263557	0	0	0.0749633	0.0250286	0	0	0	0.0278922	0	0.0603869	0.028863
ENSMUSG00000085623	0	0	0	0	0	0.0137643	0	0	0	0	0	0		0.0151059	0	0	0	0	0	0	0.016517	0.0159865	0	0	0
ENSMUSG00000091665	0.0330942	0	0	0	0	0	0	0	0	0	0	0		0	0	0	0	0	0	0	0	0	0	0	0
ENSMUSG00000033793	4.39475	4.16531	4.53414	6.03265	6.13656	5.93422	5.61568	5.62578	5.26168	5.21335	5.34125	5.1959		4.65352	4.20085	3.60266	6.91904	6.92488	6.84567	5.79927	5.56799	6.13462	5.69695	6.48863	6.27228
ENSMUSG00000104352	0	0	0	0	0	0	0	0	0	0	0	0		0	0	0	0	0	0	0	0	0	0	0	0
ENSMUSG00000104046	0	0	0	0.0885776	0.0451292	0	0.0453115	0.0244993	0	0	0	0.0263269		0.0246904	0	0.0250921	0.0468178	0	0	0.0745497	0.0269968	0	0	0	0
ENSMUSG00000102907	0	0.0265664	0	0	0	0	0	0	0	0	0	0		0	0	0	0	0	0	0	0	0	0	0	0
ENSMUSG00000025905	0.00574294	0	0	0	0	0	0.0112845	0.0183042	0.00619204	0	0.00650863	0.00655656		0.018447	0	0	0	0	0	0	0	0	0	0.00704436	0.00673397
ENSMUSG00000103936	0	0	0	0	0	0	0	0	0	0	0	0		0	0	0	0	0.135625	0	0	0	0	0	0	0
ENSMUSG00000093015	0	0	0	0	0	0	0	0	0	0	0	0		0	0	0	0	0	0	0	0	0	0	0	0
ENSMUSG00000103519	0	0	0	0	0	0.0285003	0	0	0	0	0	0		0	0	0	0	0	0	0	0	0	0	0	0
ENSMUSG00000033774	0	0	0	0	0	0	0.0419548	0.0151229	0.0153476	0.0815285	0.112926	0.0975066		0.0609637	0.0154017	0.0154889	0.0144499	0.0144735	0.0147157	0.107376	0.116652	0.2742	0.191464	0.157142	0.100145
ENSMUSG00000103090	0	0	0	0	0	0	0	0	0	0	0	0		0	0	0	0	0	0	0	0	0	0	0.119045	0
ENSMUSG00000025907	7.92061	8.47042	7.86832	7.69203	6.95581	6.79905	8.34414	8.67344	8.17357	8.50349	9.58482	9.20612		7.98652	9.03464	8.58357	7.54292	7.50434	7.82596	9.53778	10.6131	9.90334	9.15593	9.74624	11.3597
ENSMUSG00000090031	2.22685	2.03878	2.21214	2.36158	1.95164	2.03086	2.74904	2.71557	2.12957	2.71724	2.9078	2.70814		2.4776	2.59803	2.42309	2.349	2.4316	2.61243	2.96311	2.91306	2.72077	3.26757	3.50342	2.94036
ENSMUSG00000087247	0	0.0555951	0	0	0	0	0	0.0575014	0	0	0	0		0	0	0	0	0	0	0	0	0	0	0	0
ENSMUSG00000103355	0	0.0844802	0	0	0	0	0	0	0	0	0	0		0	0	0	0.083488	0	0	0	0	0	0	0	0
ENSMUSG00000102706	0	0	0	0.106696	0	0	0	0	0	0	0	0		0	0	0	0	0	0	0	0	0	0	0	0
ENSMUSG00000103845	0.0116012	0.0238335	0	0.0222813	0.011352	0	0.0341937	0.0246507	0	0.0132893	0.052592	0.0397345		0.0124215	0	0.0126236	0.0471072	0.0117961	0	0.100014	0.0950728	0.118311	0.170231	0.113842	0.108826
ENSMUSG00000033740	0.0081302	0.0167026	0.0167351	0.0312297	0.0318222	0.00793195	0.511212	0.328231	0.341874	0.437721	0.22114	0.584768		0.00870506	0.00879691	0.02654	0.0165065	0	0.00840509	0.140181	0.0666274	0.1474	0.109357	0.139617	0.0571992
ENSMUSG00000103329	0	0	0	0	0	0	0	0	0	0	0	0		0	0	0	0	0	0	0	0	0	0	0	0
ENSMUSG00000104385	0	0	0	0.0761193	0	0	0	0	0	0	0	0		0	0	0	0	0	0	0.0854192	0	0	0.0969263	0	0
ENSMUSG00000102135	0.0839515	0.0862345	0	0	0.0821481	0	0.0824799	0.178383	0.362066	0.192334	0.0951445	0.0958452		0.0898874	0.0908358	0.274049	0.255665	0.0853613	0	0	0.0982838	0	0.102655	0.205952	0.295316
ENSMUSG00000103282	0	0	0	0	0	0	0	0	0	0	0	0		0	0	0	0	0	0	0	0	0	0	0	0
ENSMUSG00000102534	0	0	0	0	0	0	0	0	0	0	0	0		0	0	0	0	0	0	0	0	0	0	0	0
ENSMUSG00000102213	0	0	0	0	0	0	0	0	0	0	0	0		0	0	0	0	0	0	0	0	0	0	0	0
ENSMUSG00000103629	0.0819869	0	0	0	0	0	0	0	0	0.0939167	0	0		0.087784	0	0	0	0	0	0	0	0	0	0	0
ENSMUSG00000051285	15.5828	15.1386	15.1192	8.28983	8.17663	9.43148	10.6539	11.2943	10.3551	12.1686	12.6479	12.7861		14.3845	14.6901	14.6357	7.11959	8.19129	8.41821	9.68565	8.99677	8.84208	8.56635	9.27127	10.289
ENSMUSG00000098201	0	0.139131	0	0	0	0	0	0	0	0	0	0.154637		0	0	0	0.137497	0.137722	0	0.145961	0	0	0	0	0
ENSMUSG00000103509	8.15442	8.76484	9.14444	4.24736	4.34071	4.08599	5.89645	6.68121	6.06304	6.30702	6.74269	6.39017		6.90098	7.66553	8.04961	3.99984	3.5288	4.49157	5.35679	5.10168	5.33701	4.29159	5.1692	4.55897
ENSMUSG00000048538	0	0	0.041638	0	0	0.0394705	0	0.0429822	0.0436208	0.0463438	0	0.0461887		0.0433176	0.0437746	0	0.0410692	0.0411364	0	0	0.0947278	0.0916856	0	0.0496251	0.0474385
ENSMUSG00000103709	0	0	0	0	0	0	0	0	0	0	0	0		0	0	0	0	0	0	0	0	0	0	0	0
ENSMUSG00000077244	0	0	0	0	0	0	0	0	0	0	0	0		0	0	0	0	0	0	0	0	0	0	0	0
ENSMUSG00000102768	0.0519304	0	0	0	0	0	0	0	0	0	0	0		0	0	0	0	0	0	0	0	0	0	0	0
ENSMUSG00000097797	0.121119	0.18662	0.324103	0.197728	0.189628	0.141799	0.29749	0.386037	0.2873	0.249738	0.164721	0.290385		0.181556	0.144157	0.171331	0.233609	0.0985225	0.187822	0.208833	0.283594	0.329383	0.370259	0.505126	0.255636
ENSMUSG00000103498	0	0	0	0	0	0	0	0	0	0	0	0		0	0	0	0	0	0.0483368	0	0	0	0	0	0
ENSMUSG00000103067	0	0	0	0	0	0	0	0	0	0	0	0		0	0	0	0	0	0	0	0	0	0	0	0
ENSMUSG00000102320	0	0	0	0	0	0	0	0	0	0	0	0		0	0	0	0	0	0	0	0	0	0	0	0
ENSMUSG00000104226	0.0501705	0	0	0	0	0	0	0	0	0	0	0		0.026859	0.0271424	0	0	0	0	0	0	0	0	0.0307699	0
ENSMUSG00000103903	0.0596522	0	0	0	0	0	0	0	0	0	0	0.0681034		0	0.064544	0	0	0	0	0	0	0	0	0	0.0699462
ENSMUSG00000103557	0	0	0	0	0	0	0	0	0	0	0	0		0	0	0	0	0	0	0.0466499	0	0	0	0	0
ENSMUSG00000025909	0.231259	0.32168	0.297513	0.0832791	0.146146	0.103409	0.085202	0.066542	0.129867	0.160049	0.22387	0.110009		0.149598	0.166816	0.220184	0.073362	0.132268	0.159385	0.244018	0.208695	0.185615	0.153173	0.141833	0.15818
ENSMUSG00000102647	0.0415115	0	0	0	0	0	0.020392	0.0441026	0.0223789	0.0237759	0	0		0	0	0.0225849	0.0421397	0	0	0.0671007	0.0728977	0	0	0.0254593	0.0243375
ENSMUSG00000086235	0.131384	0.134957	0.270439	0	0.257123	0.12818	0.129081	0	0.708292	0.150502	0.148901	0.299995		0	0	0.285924	0.133372	0.400771	0.271653	0	0	0.297749	0	0.483472	0.154056
ENSMUSG00000102253	0.0297417	0	0.03061	0.0142805	0.0145514	0.0145082	0.0146102	0.0157991	0.0320676	0.0511041	0.0674142	0.0339553		0.0318447	0.0160903	0	0	0.0302412	0.0307473	0.0480755	0.121867	0.0168505	0	0.0182408	0
ENSMUSG00000093970	0	0.490753	0	0	0	0	0	0	0	0	0	0		0	0	0	0	0	0	0	0	0	0	0	0
ENSMUSG00000103884	0	0.046377	0.0929344	0	0	0	0.0443578	0	0	0	0	0		0.0483415	0	0	0.0458323	0.137722	0.0466757	0	0.105714	0	0.165624	0	0.0529404
ENSMUSG00000084353	0	0	0	0	0	0	0	0	0	0	0	0		0	0	0	0	0	0	0	0	0	0	0	0
ENSMUSG00000103933	1.59253	1.3632	0.546341	0.764653	1.55832	1.5537	1.30385	0.845967	0.572358	1.82426	0.601621	0.909077		2.27352	0.861564	1.44406	1.34719	2.15904	1.37198	1.71615	1.86441	0.300757	2.59645	0.651141	2.4898
ENSMUSG00000076135	0	0	0	0	0	0	0	0	0	0	0	0.545446		0	0	0.519863	0	0	0.987828	0	0	0	0	0	0
ENSMUSG00000086195	0	0	0	0	0	0	0	0	0	0	0	0		0	0	0	0	0	0	0.166568	0	0	0	0	0
ENSMUSG00000104504	0	0	0	0	0	0	0	0	0	0	0	0		0	0	0	0	0	0	0	0	0.175146	0	0	0
ENSMUSG00000066693	0	0.172469	0	0	0	0	0.0824799	0.0891914	0.0905166	0.192334	0.0951445	0		0	0	0	0.0852218	0	0	0.090468	0	0	0	0	0
ENSMUSG00000102316	0.0500511	0.0514122	0	0	0	0	0.0491737	0	0	0.0573339	0	0.114284		0.16077	0	0.0544618	0.152425	0.101783	0.0517433	0.107872	0.117192	0.0567141	0	0	0.0586882
ENSMUSG00000103819	0	0.104214	0	0	0	0.0989809	0.199353	0	0.109389	0	0	0		0.217257	0.109775	0	0.10299	0	0.20977	0.10933	0	0	0	0	0.118963
ENSMUSG00000102871	0	0	0	0	0	0	0.015843	0	0	0	0	0		0	0	0	0	0	0	0	0.0188787	0	0	0	0
ENSMUSG00000101571	0.0547433	0	0	0	0	0	0.0537838	0	0.0590244	0	0.0620422	0		0	0	0	0	0.0556627	0	0	0	0	0	0.0671489	0
ENSMUSG00000104428	0	0	0	0	0	0	0	0	0	0	0	0		0	0.0894076	0	0	0	0	0	0	0.280895	0.101041	0.101357	0
ENSMUSG00000102272	0	0	0.0462289	0	0	0	0	0.0477212	0	0	0	0.0512813		0	0	0	0.0455973	0.0456719	0	0	0.052586	0	0	0	0
ENSMUSG00000065625	0	0	0	0	0	0	0	0	0	0	0	0		0	0	0	0	0	0	0	0	0	0	0	0
ENSMUSG00000103411	0.261647	0.191973	0.423162	0.107682	0.109726	0.1094	0.146892	0.397111	0.161205	0.0856339	0.211808	0.213368		0.120063	0.12133	0.162688	0.0758874	0.228035	0.115926	0.120838	0.306316	0.42354	0.502762	0.412636	0.394455
ENSMUSG00000061024	2.51477	2.71496	2.64101	6.97373	8.38664	7.91113	4.10942	4.06213	3.6798	3.85072	3.19905	3.01753		3.37947	1.88804	2.56885	8.10131	8.32331	6.95049	4.23088	3.06427	4.36156	4.48705	4.15484	3.40007
ENSMUSG00000025911	6.54835	4.58426	6.85398	2.12282	3.33308	2.18381	1.89865	1.96452	1.42408	2.18187	2.07989	3.42852		7.72589	4.7386	5.09823	2.61099	2.70008	2.34282	1.93271	1.83926	2.17404	2.10807	2.37046	2.75508
ENSMUSG00000079671	0.749237	0.681657	0.738062	0.668098	0.596987	0.595216	0.567852	0.579944	0.519318	0.44139	0.509479	0.342154		0.59593	0.775934	0.407632	0.456345	0.69652	0.520068	0.968873	0.626534	0.739824	0.366464	0.48577	0.640072
ENSMUSG00000081441	0.0476893	0	0.0490815	0	0	0	0	0	0	0	0	0		0.0510613	0	0	0	0.0484902	0	0	0	0	0	0.0584963	0
ENSMUSG00000067879	0.0161405	0	0	0	0	0	0.0317153	0.034296	0	0.0184891	0	0.0184272		0	0.0174641	0.0175629	0	0	0	0	0	0	0	0.0197982	0
ENSMUSG00000099827	0	0	0	0	0	0	0	0	0	0	0	0		0	0	0	0	0	0	0	0	0	0	0	0
ENSMUSG00000025912	1.14797	1.26913	1.01127	1.43871	1.83728	1.28133	1.4337	1.37466	1.21676	0.958396	1.14667	1.01072		0.979144	1.02105	1.05859	1.22459	1.73109	1.77012	1.11127	1.45785	1.19055	1.21339	1.07399	1.32325
ENSMUSG00000045210	6.93779	7.79647	7.46766	12.1703	11.1616	8.95645	11.2226	10.9617	9.8866	9.20701	9.70782	10.4563		7.7631	7.13926	8.38211	10.6161	10.5074	10.5941	11.3394	11.1641	11.1843	10.6785	11.2342	11.2196
ENSMUSG00000097893	0.0677892	0.0522246	0.017442	0.0325489	0.0497498	0.0165341	0.0333005	0.0180051	0.0365452	0.0582399	0.0192069	0.0386966		0.0362912	0.110022	0.0368816	0.0344075	0.0344638	0.0175203	0.0730512	0	0.0192034	0.020723	0.0207878	0.0198718
ENSMUSG00000025915	3.13243	2.94225	3.21254	6.10077	4.73965	3.15995	3.00176	3.09386	2.54987	2.83104	2.85504	3.22824		2.41026	2.46748	2.44947	3.9254	3.5771	3.44715	2.50893	1.68528	1.7976	1.5896	1.36935	1.76544
ENSMUSG00000046334	0.294418	0.302425	0.151506	0	0	0	0	0	0	0	0	0		0	0	0.160182	0	0	0	0	0	0	0	0	0
ENSMUSG00000088916	0	0	0	0	0	0	0	0	0	0	0	0		0	0	0	0	0	0	0	0	0	0	0	0
ENSMUSG00000046101	0.0355332	0	0.0365705	0.264449	0.295544	0.121334	0.0785483	0.0566266	0.028734	0.0203518	0.0402708	0.060851		0.00951141	0.0384471	0.0579968	0.0450886	0.135487	0.0918366	0.0382914	0.0103999	0.0201318	0.0108624	0.0108964	0.0208325
ENSMUSG00000098234	4.44826	4.38081	5.38046	10.3488	11.667	10.3797	8.19992	7.69786	6.13112	6.14614	6.08078	6.96324		5.49929	4.81303	5.38915	13.7329	11.9369	12.2789	8.99406	7.51623	8.8857	9.19633	8.71881	10.7006
ENSMUSG00000093178	1.81219	0.620492	4.35189	9.86139	6.50197	8.84002	5.34129	5.13415	3.90782	3.45981	3.42302	2.75858		4.52743	1.9608	2.62919	9.19808	7.3705	8.11835	9.7643	3.53596	10.9517	5.90916	5.18668	10.6246
ENSMUSG00000099032	0.27574	0.231741	0.193493	0.132396	0.147173	0.134508	0.295535	0.119844	0.162166	0.229719	0.227276	0.300496		0.241558	0.271229	0.218211	0.279913	0.331347	0.220276	0.202598	0.322815	0.525481	0.444455	0.538088	0.529075
ENSMUSG00000104025	0	0	0	0	0	0	0.0375782	0	0	0	0	0.0436674		0	0	0	0.0388274	0	0	0	0	0	0	0	0
ENSMUSG00000025916	0.138027	0.106335	0.035514	0	0	0.0336652	0	0	0.0372051	0.158111	0.0391073	0		0.0369465	0.0373363	0.112643	0.105086	0.0701722	0.0356734	0.0371851	0.0403977	0	0	0.0423263	0.0809227
ENSMUSG00000087199	0	0	0	0	0	0	0	0	0	0	0	0		0	0	0	0	0	0	0	0	0	0	0	0
ENSMUSG00000095780	0	0	0	0	0	0	0	0	0	0	0	0		0	0	0	0	0	0	0	0	0	0	0	0
ENSMUSG00000025917	7.91235	7.75484	8.91888	10.868	10.7192	9.69351	8.98015	9.11785	8.45588	9.25549	9.14125	9.68652		8.48675	7.74584	7.75929	10.5253	10.8547	10.2862	8.37614	9.13246	10.3097	9.35094	10.3216	11.2904
ENSMUSG00000056763	3.11974	3.27532	3.12146	2.96713	3.03808	2.86549	4.05341	4.44686	3.96415	3.85493	4.39077	4.03685		3.24416	3.43713	3.66507	2.98459	3.28782	3.39856	4.64924	5.114	4.97012	4.70443	5.15248	4.76045
ENSMUSG00000102356	0	0	0	0	0	0	0	0	0	0	0	0		0	0	0	0	0	0	0	0	0	0	0	0
ENSMUSG00000067851	9.95538	9.60606	11.0632	14.63	13.9353	12.5893	13.6586	13.2357	12.7916	12.872	12.4404	13.1523		10.535	10.9376	10.8125	14.2823	14.7117	13.6858	13.8905	14.1067	13.701	14.348	14.4726	14.314
ENSMUSG00000088153	0	0	0	0	0	0	0	0	0	0	0	0		0	0	0	0	0	0	0	0	0	0	0	0
ENSMUSG00000102556	1.7701	1.69284	2.10446	2.34458	2.18002	2.26288	2.75853	2.52906	2.00724	1.9927	2.90539	2.29962		1.6992	2.24547	2.49063	2.69533	2.6687	2.52407	2.82836	2.92979	3.28527	2.16446	2.39584	1.89663
ENSMUSG00000042501	0	0	0	0	0	0.00749592	0	0.00816284	0	0	0.0174153	0.0175436		0	0	0	0	0	0.0158861	0.00827967	0	0.00870611	0	0.00942441	0.0270275
ENSMUSG00000103810	0	0.0196659	0	0	0	0	0	0	0.0206424	0	0	0		0	0	0	0	0	0	0	0	0	0	0	0
ENSMUSG00000083422	0.144378	0.0370761	0.0371482	0.0346615	0	0.0704287	0	0.0383474	0.0778343	0.0413466	0	0.0412082		0.11594	0.117163	0	0.0366407	0.110102	0.111945	0.0388963	0	0.204498	0.308953	0.132822	0.0423232
ENSMUSG00000094979	0	0	0	0	0	0	0	0	0	0	0	0		0	0	0	0	0	0	0	0	0	0	0	0
ENSMUSG00000081417	0.640898	0	0.329804	0.615453	0.731652	0	0	0.34045	0	1.22359	0.242116	0.731696		0	0.231151	0.813606	0.542163	0.43444	0.331284	0.345323	0	0.363108	0	0.917156	0.500997
ENSMUSG00000103448	0	0	0	0	0	0	0	0	0	0	0	0		0	0	0	0	0	0	0	0	0	0	0	0
ENSMUSG00000100212	0	0	0	0	0	0	0	0	0	0	0	0		0.0453056	0	0	0	0	0	0	0	0	0	0	0
ENSMUSG00000100648	0.0692406	0.0711236	0	0	0	0.0675522	0	0.0735624	0	0	0	0.1581		0.148273	0	0	0.0702883	0.140807	0.143163	0.14923	0.0810615	0	0	0	0
ENSMUSG00000088585	0	0	0	0	0	0	0	0	0	0	0	0		0	0	0	0	0	0	0	0	0	0	0	0
ENSMUSG00000048960	23.0541	22.8588	22.5971	11.6042	12.1061	15.327	5.81638	5.7518	5.44493	10.8375	10.3959	10.7073		19.9479	20.6822	20.5926	9.41129	10.8713	11.4785	4.45317	4.21185	3.44556	3.24619	3.17871	3.3837
ENSMUSG00000077318	0	0	0	0	0	0	0	0	0	0	0	0		0	0	0	0	0	0	0	0	0	0	0	0
ENSMUSG00000101827	0.17259	0	0.0888141	0	0	0.0841907	0	0	0	0.0988516	0	0		0.0923966	0.0933715	0.187799	0.0876007	0.0877441	0.267638	0	0	0	0	0	0.202373
ENSMUSG00000103494	0	0	0	0	0	0	0	0	0	0	0	0		0	0	0	0	0	0	0	0	0	0	0	0
ENSMUSG00000057715	0.246086	0.12345	0.1178	0.0549571	0.1064	0.044667	0.0112452	0.00608013	0.0308523	0.0590009	0.0583735	0.0392023		0.1777	0.148613	0.217954	0.0406667	0.0290951	0.0295821	0.0308358	0.0267998	0.0324239	0.0419877	0.0350991	0.0201315
ENSMUSG00000103825	0.0212682	0.0218466	0.021889	0	0.0624339	0	0	0.0225956	0	0.0243629	0.0482076	0		0.022772	0.0230122	0	0	0	0.0219873	0	0	0	0	0	0
ENSMUSG00000099845	0	0	0	0	0	0	0	0.213106	0	0	0	0		0	0	0	0	0.203955	0	0.216156	0	0	0.245275	0.246042	0
ENSMUSG00000103561	0	0.0251786	0	0	0.0239854	0	0.0240823	0	0	0	0	0		0.0524902	0	0	0	0	0	0	0	0	0	0	0
ENSMUSG00000101610	0	0	0	0.0578088	0.117811	0.0587309	0	0	0	0.0689583	0	0		0.0644554	0	0	0	0	0	0	0	0	0	0	0
ENSMUSG00000093864	0	0	0	0	0	0	0	0	0	0	0	0		0	0	0	0	0	0	0	0	0	0	0	0
ENSMUSG00000098555	0	0	0	0	0	0	0	0	0	0	0	0		0	0	0	0	0	0	0	0	0	0	0	0
ENSMUSG00000097628	0.130244	0	0.268093	0.312683	0.19117	0	0	0	0.0702149	0.0745981	0	0		0.139454	0	0.0708611	0.0661076	0.264863	0.134648	0.0701771	0.15248	0.0737916	0	0.0798798	0.0763601
ENSMUSG00000098163	0	0	0	0	0	0	0	0	0	0	0	0		0	0	0	0	0	0	0	0	0	0	0	0
ENSMUSG00000097171	0	0	0	0	0	0	0	0	0	0	0	0		0.0175842	0	0	0	0	0	0	0	0	0	0.0201447	0
ENSMUSG00000101314	0	0	0.0634089	0	0	0.060108	0	0	0	0	0	0		0	0	0	0.0625426	0	0	0	0	0	0	0	0
ENSMUSG00000016918	7.40795	7.8245	7.18361	12.9765	12.9814	11.64	6.34548	6.49104	8.53413	8.87498	11.66	7.59684		10.4827	10.4724	8.78482	13.0703	13.0349	12.2333	13.9351	11.0206	12.4646	9.65582	9.41774	10.8142
ENSMUSG00000025938	0.0680073	0.0410922	0.0411721	0.165189	0.0822044	0.0702518	0.113979	0.0552516	0.707376	0.087068	0.0408042	0.109612		0.158482	0.138511	0.0565885	0.0934021	0.093555	0.115799	0.250035	0.0796176	0.0589288	0.0684837	0.0736047	0.0515984
ENSMUSG00000104518	0	0	0	0	0.0933298	0	0	0	0	0	0	0		0	0	0	0	0	0	0	0	0	0	0	0
ENSMUSG00000069620	0	0	0	0	0	0	0	0	0	0	0	0		0	0	0	0	0	0	0	0	0	0	0	0
ENSMUSG00000099498	0	0	0	0	0	0	0	0	0	0	0	0		0	0	0	0	0	0	0	0	0	0	0	0
ENSMUSG00000042414	0	0	0	0.019683	0	0	0	0	0.0220996	0	0	0		0	0	0	0.0208069	0	0.0211897	0	0	0	0.0250632	0	0
ENSMUSG00000005886	7.86524	8.09984	8.85557	6.92705	6.59164	6.45081	7.60194	7.36027	6.28869	7.30859	7.60784	7.27645		7.93932	8.17577	8.34266	6.08454	7.1296	5.92905	7.1289	7.54026	7.29049	7.02931	6.98534	6.25208
ENSMUSG00000103506	0.723108	1.17406	1.27237	1.008	0.890174	1.00132	1.3292	1.2391	1.28266	1.09553	1.26893	1.25165		0.924089	0.959078	1.39599	0.568297	1.23332	0.844016	1.65902	1.74773	1.16298	1.05535	1.17309	0.711135
ENSMUSG00000103495	2.26246	2.52318	2.52809	1.7381	1.48645	1.6397	1.74648	2.09463	2.50908	2.55464	3.18681	2.80438		2.80309	2.20319	2.14531	1.83735	1.97181	1.73751	2.8212	2.38384	2.78338	3.08269	2.77516	2.2739
ENSMUSG00000099183	0	0	0	0	0	0	0	0	0	0	0	0		0	0	0	0	0	0	0	0	0	0	0	0
ENSMUSG00000102639	1.28548	1.47579	1.24519	1.45229	0.887908	1.03282	1.26295	1.28538	0.978361	1.73239	1.71397	1.81292		1.78119	1.55453	1.56333	0.921131	1.53773	1.32895	1.38527	1.15084	1.71366	1.0171	1.85505	0.886656
ENSMUSG00000104170	2.16166	2.24928	2.16698	1.94104	1.64823	1.50639	2.31684	2.80362	1.81613	2.60483	2.09989	2.46791		2.19427	2.21742	1.98559	1.25393	1.99815	1.56723	2.45046	1.93911	2.25857	2.05968	1.79064	1.84341
ENSMUSG00000087782	0	0.48199	0.482927	2.7036	0	0	2.76602	4.48665	2.52962	1.61252	1.06358	0.535706		0	0.507707	2.04232	1.42899	0.477108	2.91056	4.04521	3.29602	0.531695	2.29508	2.87781	2.75101
ENSMUSG00000103085	1.92463	2.45376	2.50514	3.19632	2.61444	2.24219	3.32574	3.39189	3.69862	3.4367	3.61828	3.28302		2.83651	2.85419	2.85801	2.58584	2.35985	2.5632	3.29403	4.6522	3.6946	2.90716	3.52727	2.46915
ENSMUSG00000102664	2.26766	3.19382	2.64664	2.62662	2.58496	2.34921	2.87102	3.12948	2.99953	3.24034	3.6298	2.98928		3.72961	3.11129	3.25608	2.94273	2.63853	2.80353	2.79638	4.10536	3.23179	2.91581	3.78519	2.38486
ENSMUSG00000101476	0	0	0	0	0.0755135	0	0	0	0.0832062	0	0	0.176209		0.165256	0.0834996	0.251916	0	0.0784672	0	0	0	0.174889	0	0.189319	0
ENSMUSG00000101171	0	0.167649	0	0.0783651	0.239556	0.15923	0.0801746	0	0	0	0	0		0	0.088297	0	0.0828398	0	0.168728	0	0	0.0924686	0	0	0.191375
ENSMUSG00000025935	44.1437	44.832	41.9086	67.082	67.6392	56.5582	59.1275	56.0281	47.8467	47.14	50.4437	50.0941		41.6416	41.1458	40.6913	66.0365	65.2658	59.2618	55.7016	49.0143	50.9243	46.398	49.6418	53.6323
ENSMUSG00000025937	6.72171	6.83357	7.59314	5.28324	5.47359	5.61455	5.213	5.30703	4.50478	5.36611	4.94381	5.53211		6.64242	5.62904	6.33718	5.32787	5.00891	5.87807	3.82018	4.29844	3.88652	5.33407	5.52015	5.50636
ENSMUSG00000102982	1.28686	1.53506	1.32442	1.67426	1.50293	1.41748	2.0392	2.07282	1.56652	1.99718	1.31729	2.08528		1.55563	1.34747	1.85196	1.43275	1.81497	1.84535	1.38675	2.38133	0.893717	1.92888	2.39318	1.46025
ENSMUSG00000067813	0.0272864	0.0280285	0	0	0	0	0.0268081	0	0	0	0.0309244	0.0623043		0	0.029524	0	0	0.0277446	0	0.0294044	0	0	0	0	0
ENSMUSG00000077368	0	0	0	0	0	0	0	0	0	0	0	0		0	0	0	0	0	0	0	0	0	0	0	0
ENSMUSG00000097711	0.158135	0.270726	0.0542505	0.050619	0	0.0514264	0	0	0	0	0.119479	0.0601796		0.112878	0.285172	0.114714	0	0.0535969	0.054494	0.0568034	0	0	0	0	0
ENSMUSG00000102166	0	0	0	0	0	0.0227977	0	0	0	0	0	0		0	0.0252838	0	0	0	0	0	0	0	0	0	0
ENSMUSG00000089358	0	0	0	0	0	0	0	0	0	0.195457	0	0		0	0	0.185665	0	0	0	0	0	0	0	0	0
ENSMUSG00000104209	0	0.0149744	0	0	0	0	0	0	0	0	0	0		0	0	0	0	0	0	0	0	0	0	0	0
ENSMUSG00000025932	0.107692	0.096793	0.0554178	0.122807	0.0263446	0.0787994	0.178545	0.257431	0.304798	0.115652	0.183075	0.130633		0.122513	0.18935	0.0952105	0.109321	0.0615939	0.0834998	0.123304	0.0630386	0.0915212	0.0740726	0.107328	0.110491
ENSMUSG00000095853	0	0	0	0	0	0	0	0	0	0	0	0		0	0	0	0	0	0	0	0	0	0	0	0
ENSMUSG00000102588	0	0	0	0	0	0	0	0	0	0	0.271346	0		0	0	0	0	0	0.12376	0	0	0	0	0	0.14037
ENSMUSG00000054493	0.280011	0.181658	0.303353	0.155675	0.100946	0.100646	0.101354	0.140915	0.254238	0.3714	0.300642	0.0673013		0.157795	0.143513	0.160361	0.0299208	0.104894	0.10665	0.190576	0.0690137	0.116895	0.108125	0.343465	0.172806
ENSMUSG00000025930	0.433474	0.148421	0.424884	0.297332	0.242379	0.181245	0.385317	0.30702	0.378349	0.709355	1.38023	0.447754		0.530428	0.268012	0.33691	0.251448	0.293836	0.448131	0.556097	0.289987	0.257285	0.706732	0.531706	0.314648
ENSMUSG00000103492	0.097299	0.0249863	0.112657	0.0116795	0.0119011	0.0474632	0.0477967	0	0.0393405	0.0417963	0.165407	0.0555418		0.130223	0.052639	0.0529367	0.0246928	0.0618331	0.0125736	0	0.0142388	0.027563	0.0743603	0.0149185	0.0998283
ENSMUSG00000081201	0	0	0	0	0	0	0	0	0	0	0	0		0	0	0	0	0	0	0	0	0	0	0	0
ENSMUSG00000082193	0	0	0	0	0	0	0	0	0	0.0673385	0	0		0.125883	0	0	0	0	0	0	0.0688207	0	0	0.144212	0.0689291
ENSMUSG00000032769	0.0493114	0	0	0	0.012063	0	0	0	0	0	0	0		0	0.0133388	0	0	0	0	0.0132848	0	0	0.0150744	0	0.0144552
ENSMUSG00000088159	0	0	0	0	0	0	0	0	0	0	0	0		0	0	0	0	0	0	0	0	0	0	0	0
ENSMUSG00000073737	0	0	0	0	0	0	0	0	0.056891	0	0	0		0	0	0	0	0	0	0	0	0	0	0	0
ENSMUSG00000092083	0.15248	0.0320373	0.0320996	0.00665574	0.0237371	0.0101429	0.0170236	0.00368176	0.00373646	0	0	0.00395642		0.0704992	0.116239	0.13198	0.00703579	0.0211419	0.0214958	0.0933613	0.178512	0.149218	0.182214	0.199786	0.178793
ENSMUSG00000102937	0.0685631	0	0	0	0	0	0	0.0364213	0	0	0	0		0.073411	0.148371	0.14921	0.0348003	0	0	0.14777	0.441476	0.271917	0.251515	0.378452	0.0803948
ENSMUSG00000104149	0	0	0.0258917	0	0	0.0981754	0	0.0267275	0.0271247	0	0	0.0287214		0.0538722	0.108881	0.109497	0	0	0	0.0542202	0.235618	0.0570127	0.0922865	0.246866	0.176992
ENSMUSG00000088829	0	0	0	0	0	0	0	0	0	0	0	0		0	0	0	0	0	0	0	0	0	0	0	0
ENSMUSG00000077377	0	0	0	0	0	0	0	0	0	0	0	0		0	0	0	0	0	0	0	0	0	0	0	0
ENSMUSG00000101652	0	0.215071	0.215489	0	0	0	0.411414	0.222446	0	0	0	0		0	0	0.227828	0	0	0	0	0	0	0	0	0
ENSMUSG00000100814	0	0	0	0	0	0	0	0	0	0	0	0		0	0	0	0	0	0	0	0	0	0	0	0
ENSMUSG00000025925	2.42924	2.9639	2.85229	2.47517	2.95737	2.41451	3.56318	3.53808	3.27093	3.67109	3.78716	3.59369		3.26041	2.59142	3.26381	2.33864	2.85271	2.66465	2.97421	3.04424	3.45048	3.61196	3.69319	3.08915
ENSMUSG00000104379	1.12769	1.17539	1.41663	0.764412	0.551732	0.501557	0.76577	0.880938	0.911907	1.00683	0.939736	1.24959		0.994349	1.29194	1.1188	0.387196	0.826245	0.82293	0.929288	0.621275	1.03352	0.730021	0.854353	0.875045
ENSMUSG00000032719	58.5969	67.4589	57.0795	42.3681	43.6586	53.5111	65.2545	53.1519	30.9917	71.2199	79.7391	64.344		51.2732	65.1817	55.8531	32.4403	33.5823	40.1152	9.23274	10.7692	12.0053	15.06	15.0132	17.0875
ENSMUSG00000088943	0	0	0	0	0	0	0	0	0	0	0	0		0	0	0	0	0.176357	0	0	0	0	0	0	0
ENSMUSG00000100652	0.0950337	0.0976181	0.0978079	0.182521	0	0.0927163	0	0.100965	0.204931	0.217724	0.215409	0		0	0	0.103408	0	0.386518	0	0.204821	0.222516	0.107685	0	0	0.111433
ENSMUSG00000067795	0.101897	0.0261671	0.104872	0.0733889	0.17449	0.149119	0.125139	0.0811932	0.0274665	0.116724	0.173225	0.0290834		0.0545512	0.0275634	0	0.103439	0.155413	0.158014	0.0549035	0.0298234	0.0288656	0.0934495	0	0.0298704
ENSMUSG00000043716	21.5339	21.1753	19.7067	31.7979	31.1763	27.8972	27.8627	25.0806	22.8594	26.7957	28.5057	25.1652		19.9153	21.5433	19.3241	30.3574	30.9639	30.1477	27.3364	27.3168	29.8746	28.0056	28.7648	36.9919
ENSMUSG00000025921	4.73741	5.15173	4.8497	21.9338	30.657	29.235	7.95586	6.91212	6.36101	7.04753	8.20388	6.70663		4.369	4.49712	4.52255	48.3346	40.5395	35.4454	9.32538	9.05137	9.51938	8.38806	8.67771	8.62124
ENSMUSG00000104165	0	0	0	0	0	0	0.0222458	0	0.0244134	0	0	0		0	0.0244995	0	0	0	0	0.0244002	0	0	0	0	0
ENSMUSG00000100868	0	0	0	0	0	0.033843	0	0	0	0	0	0		0	0	0	0	0	0.0358617	0.0373815	0	0	0	0	0
ENSMUSG00000025920	2.50812	2.4083	2.54927	1.87746	1.814	2.0062	1.69889	1.23303	1.57048	1.67744	1.65078	1.68961		2.04328	2.10698	2.01719	1.59722	1.9008	2.02924	1.6284	1.43168	1.52692	1.36201	1.15607	1.46133
ENSMUSG00000089982	0	0	0	0	0	0	0	0	0	0	0	0		0	0	0	0	0	0	0.0564636	0	0	0	0	0
ENSMUSG00000025939	7.11019	6.97506	7.77855	7.47282	8.20918	8.78802	8.43085	8.94701	7.74668	8.10816	9.2663	8.81122		7.62435	7.53178	7.12201	9.82571	9.79843	9.52162	10.2927	8.81078	9.53038	9.72405	9.40139	10.5121
ENSMUSG00000102457	0.0529063	0.018115	0.0363005	0.0338705	0.0690264	0.0516162	0.051979	0.0374724	0.0570437	0.0404031	0.11992	0.0402678		0	0.0190816	0.0959478	0.0716092	0.089658	0.0546951	0.0760174	0.0412924	0.0399663	0.0646934	0.0865275	0.103394
ENSMUSG00000079658	11.393	10.0973	10.1348	12.3583	12.6098	10.9288	9.06042	9.55781	8.3703	9.07187	10.4319	9.87427		9.83694	9.62127	9.77019	12.4998	11.9728	12.7118	10.2374	9.21055	9.85937	9.95999	9.50115	10.5284
ENSMUSG00000097744	0.0188499	0	0.0194002	0.0181015	0.018445	0.0183903	0	0.040053	0.020324	0.0431855	0	0		0.0403655	0	0	0	0	0	0.0203131	0	0	0	0.0231216	0
ENSMUSG00000100959	0	0	0.0791915	0	0	0	0	0	0	0	0	0		0	0	0	0	0	0	0	0	0.0871886	0	0	0
ENSMUSG00000025940	8.43168	8.09742	8.7967	9.34474	9.91762	8.5923	7.63139	7.60813	6.00881	5.65621	6.80691	7.21967		8.31676	7.40472	7.63512	9.70246	8.98432	9.61232	8.46383	6.22018	7.68912	7.41486	8.14642	9.41268
ENSMUSG00000025779	2.62511	2.96086	1.90711	5.28891	5.23817	2.36022	5.46161	4.70295	2.88589	3.59671	3.38345	4.58367		2.36982	1.7822	2.01631	4.44138	4.2393	3.51206	4.38198	3.25405	4.4327	2.83232	3.78823	4.40593
ENSMUSG00000100093	0	0	0	0	0	0	0	0	0	0	0	0		0	0	0	0	0	0	0	0	0	0	0	0
ENSMUSG00000091020	0.169528	0.145115	0.0872384	0.135664	0.165886	0.0551313	0.138797	0.240146	0.0609284	0.0970978	0.0640435	0.0967727		0.0302524	0.0611433	0.0614891	0.200775	0.172375	0.14605	0.152239	0.0661566	0.128064	0.0690991	0.0346575	0.132522
ENSMUSG00000101640	0	0	0	0	0	0	0	0	0	0	0	0		0	0	0	0	0	0	0	0	0	0	0	0
ENSMUSG00000104133	0	0	0	0	0	0	0	0	0	0	0	0		0	0	0	0	0	0	0	0	0	0	0	0
ENSMUSG00000042686	0.557291	0.464438	0.616848	0.454386	0.339539	0.410341	0.485539	0.323966	2.87965	0.397483	0.286005	0.252097		1.44108	2.00239	0.766584	0.458984	0.35282	0.336984	0.895159	0.283131	0.333612	0.37287	0.386933	0.394542
ENSMUSG00000100110	0	0	0	0	0	0	0	0	0	0	0	0		0	0	0	0	0	0	0	0	0	0	0	0
ENSMUSG00000025777	0.149551	0.0488785	0.0489736	0.0261116	0.0665175	0.0331601	0.0400717	0.0433324	0.0952819	0.0155738	0.0154082	0.0155217		0.0363921	0.117684	0.044381	0.0276026	0.0483835	0.0491933	0.0512781	0.00795831	0.0231082	0.0581859	0.00833824	0.0318834
ENSMUSG00000099899	0	0	0	0	0	0	0	0	0	0	0	0		0	0	0	0	0	0	0	0	0.0589019	0	0	0
ENSMUSG00000100272	0	0	0	0	0	0	0	0	0	0	0	0		0	0	0	0	0	0	0	0	0	0	0	0
ENSMUSG00000100398	0	0	0	0.106922	0.108951	0.108627	0	0	0	0	0.126187	0		0	0	0	0.339082	0	0	0	0	0	0	0	0.130556
ENSMUSG00000101589	0.164802	0.188093	0.207305	0.105506	0.197098	0.232243	0.269856	0.13618	0.138203	0.25171	0.37355	0.18815		0.235273	0.336821	0.278951	0.111531	0.223426	0.208235	0.157862	0.192938	0.207491	0.201519	0.179688	0.214713
ENSMUSG00000102048	0.108135	0	0.111292	0	0	0	0	0.114884	0	0	0.122552	0		0	0	0	0	0	0	0.116529	0	0	0.132227	0	0
ENSMUSG00000089534	0	0	0	0	0	0	0	0	0	0	0	0		0	0	0	0	0	0	0	0	0	0	0	0
ENSMUSG00000067780	3.32493	1.73107	3.37512	6.26921	5.53393	7.02835	3.64701	3.97603	4.91088	2.8609	6.50407	3.76998		4.57601	3.81114	2.74236	8.44581	6.15948	7.34557	10.8554	5.02123	5.61693	2.51553	3.93873	2.51012
ENSMUSG00000100053	0.174431	0.063991	0.141054	0.0358941	0.0609586	0.133711	0.0367229	0.105896	0.094036	0.0856339	0.169447	0.0568981		0.200105	0.12133	0.176246	0.0379437	0.0760116	0.0901644	0.120838	0.0583458	0.169416	0.0609409	0.10698	0.0584377
ENSMUSG00000085125	0.346369	0.368726	0.272221	0.169332	0.0985974	0.135169	0.148494	0.227484	0.196913	0.230847	0.52102	0.129417		0.343888	0.299818	0.349482	0.10868	0.217715	0.24089	0.285031	0.265419	0.128448	0.138612	0.270366	0.162456
ENSMUSG00000025776	2.60731	3.2043	2.67145	2.88384	3.8839	2.12356	1.95551	2.00334	2.43471	2.66669	9.43206	2.89697		3.67652	3.74051	2.96373	5.36442	6.3792	4.8735	4.54067	4.0472	4.26015	2.91777	3.75499	3.0163
ENSMUSG00000099895	0	0	0	0	0	0	0	0	0	0.0957085	0	0		0	0	0	0	0.0849541	0	0	0	0	0	0	0
ENSMUSG00000100554	0.0375651	0.154347	0.0773235	0.252516	0.110275	0.0732982	0.258347	0.239459	0.0810056	0.0860624	0.212868	0.128661		0.281549	0.243874	0.0817511	0.419469	0.152784	0.116506	0.121443	0.0879566	0.21283	0.183737	0.368623	0.0880952
ENSMUSG00000099473	0	0	0	0	0	0	0	0	0	0	0	0		0	0	0	0	0	0	0	0	0	0	0	0
ENSMUSG00000099591	0	0	0	0	0	0	0	0	0	0	0	0		0	0	0	0	0	0	0	0.0240617	0.0232889	0.0251318	0	0
ENSMUSG00000109887	0	0	0	0	0	0.0598507	0	0	0	0	0	0		0	0	0	0	0	0	0	0	0	0	0	0
ENSMUSG00000102001	0	0	0	0	0	0	0	0	0	0	0	0		0	0	0	0	0	0	0	0	0	0	0	0
ENSMUSG00000101717	0	0	0	0	0	0	0	0	0	0	0	0		0	0	0	0	0	0	0	0	0	0	0	0
ENSMUSG00000025774	0	0	0	0	0	0	0	0	0	0	0	0		0	0	0	0	0	0	0	0	0	0	0	0
ENSMUSG00000070977	0	0	0	0	0	0	0	0	0	0	0	0		0	0	0	0	0	0	0	0	0	0	0	0
ENSMUSG00000073735	0	0	0	0	0	0	0	0	0	0	0	0		0	0	0	0	0	0	0	0	0	0	0	0
ENSMUSG00000067773	0	0	0	0	0	0	0	0	0	0	0	0		0	0	0	0	0	0	0	0	0	0	0	0
ENSMUSG00000101685	0.0533539	0	0	0.102471	0.0522078	0.0520529	0	0	0.0575263	0	0.120935	0.121826		0	0.173188	0	0	0.0542499	0.0551579	0	0	0	0.0652407	0	0.312805
ENSMUSG00000101306	0	0	0	0	0.0565728	0	0	0	0	0.0662273	0	0		0	0	0	0	0	0	0	0	0	0	0	0
ENSMUSG00000088800	0	0	0	0	0	0	0	0	0	0	0	0		0	0	0	0	0	0	0	0	0	0	0	0
ENSMUSG00000101644	0	0	0	0	0	0	0	0	0	0	0	0		0	0	0	0	0	0	0	0	0	0	0	0
ENSMUSG00000099433	0	0	0	0	0	0	0	0	0	0	0	0		0	0	0	0	0	0	0	0	0	0	0	0
ENSMUSG00000089787	0	0	0	0	0	0	0	0	0	0	0	0		0	0	0	0	0	0	0	0	0	0	0	0
ENSMUSG00000042596	0	0	0	0	0	0	0	0	0	0	0	0		0	0	0	0	0	0	0	0	0	0.0328875	0	0
ENSMUSG00000100720	0	0.0990511	0	0	0	0	0	0	0	0	0	0		0	0	0	0	0.098048	0	0	0	0	0	0	0
ENSMUSG00000025927	0	0.00851733	0	0	0	0	0.00814649	0.00880938	0	0	0	0		0	0	0	0	0.00843107	0	0	0	0	0	0	0
ENSMUSG00000100538	0	0	0	0	0	0	0	0	0	0	0	0		0	0	0	0	0	0	0	0	0	0	0	0
ENSMUSG00000101117	0	0.11437	0	0	0	0	0	0	0	0	0.126187	0		0	0	0	0	0	0	0	0	0	0	0	0
ENSMUSG00000100204	0.0233988	0.0961404	0	0.0898791	0.137377	0.114141	0.0919545	0.0497185	0.126143	0.107214	0.0795554	0.160282		0.0751596	0.0506351	0	0.0712585	0.190334	0.0725697	0.0756451	0.109574	0.106055	0.0858354	0.0574025	0.0274366
ENSMUSG00000084668	0	0	0	0	0	0	0	0	0	0	0	0		0	0	0	0	0	0	0	0	0	0	0	0
ENSMUSG00000102597	0	0	0	0	0	0	0	0	0	0	0	0		0	0	0	0	0	0	0	0	0	0	0	0
ENSMUSG00000043760	0	0	0.0113392	0	0	0	0	0	0.00395971	0	0	0		0	0.00794734	0	0	0	0	0.0395758	0	0	0	0.00450475	0.00861252
ENSMUSG00000104095	0	0	0	0	0	0	0	0	0	0	0	0		0	0	0	0	0	0	0	0	0	0	0	0
ENSMUSG00000089914	0	0	0	0	0	0	0	0	0	0	0	0		0	0	0	0	0	0	0	0	0	0	0	0
ENSMUSG00000090142	0	0	0	0	0	0	0	0	0	0	0	0		0	0	0	0	0	0	0	0	0	0	0	0
ENSMUSG00000070175	0	0	0	0	0	0	0	0	0	0	0	0		0	0	0	0	0	0	0	0	0	0	0	0
ENSMUSG00000099906	0	0	0.00974379	0.100007	0	0	0.0186029	0	0.36748	0.010845	0	0		0	0	0	0	0	0	0.234653	0	0	0	0	0
ENSMUSG00000065559	0	0	0	0	0	0	0	0	0	0	0	0		0	0	0	0	0	0	0	0	0	0	0	0
ENSMUSG00000065480	0	0	0	0	0	0	0	0	0	0	0	0		0	0	0	0	0	0	0	0	0	0	0	0
ENSMUSG00000025929	0	0	0	0	0	0	0	0	0	0	0	0		0	0	0	0	0	0	0	0	0	0	0	0
ENSMUSG00000041872	0	0	0.0267497	0	0.0254326	0	0	0	0	0.0297728	0	0.0296731		0	0.0562445	0.0282813	0.0263842	0.0528547	0	0	0	0	0	0	0
ENSMUSG00000041859	3.23558	2.83439	2.72457	13.9484	14.5831	7.95319	9.39897	6.71137	5.11964	4.31609	3.55585	3.98181		3.10442	2.97047	3.27685	9.62611	13.1739	10.2666	7.35081	6.51005	6.14226	6.37141	5.48073	5.12427
ENSMUSG00000099714	0	0	0	0	0	0.0432311	0	0	0	0	0	0		0	0	0	0	0	0.0458099	0	0	0.0502106	0	0	0
ENSMUSG00000102121	0	0	0	0	0	0	0	0	0	0	0	0		0	0	0	0	0	0	0	0	0	0	0	0
ENSMUSG00000088858	0	0	0	0	0	0	0	0	0	0	0	0		0	0	0	0	0	0	0	0	0	0	0	0
ENSMUSG00000097934	0.187691	0.337393	0.193171	0.13518	0.0459149	0.0915573	0	0.149555	0.151777	0.161252	0.265895	0.160712		0	0.253854	0.153174	0.142899	0.0477108	0.242547	0.0505651	0.109867	0.106339	0.0573769	0.230225	0.11004
ENSMUSG00000025931	10.3326	14.9515	10.6737	6.82336	6.87787	8.74466	5.06163	5.90081	4.63591	6.41716	6.05589	5.95836		7.00293	9.43921	7.92961	3.69398	4.44977	4.28665	2.88944	3.39692	3.34208	3.75877	2.94829	2.97558
ENSMUSG00000077314	0	0	0	0	0	0	0	0	0	0	0	0		0	0	0	0	0	0	0	0	0	0	0	0
ENSMUSG00000100929	0.122503	0.125834	0.189118	0.235278	0.119871	0.179273	0.120355	0.0650744	0.264165	0.140328	0.138836	0.209787		0.0655822	0.198823	0	0.0621781	0.0622799	0.0633223	0.0660058	0.0717082	0.0694053	0.29959	0	0.0718212
ENSMUSG00000041809	1.73751	1.76031	2.13118	1.75995	1.44399	1.39326	2.0812	1.82067	1.71941	2.12665	1.67244	2.28257		2.19166	1.82848	1.68343	0.845657	1.45207	0.885824	3.18047	2.67503	2.88579	2.0373	1.51815	2.12107
ENSMUSG00000041779	3.40048	2.89324	4.4092	9.17515	10.3374	10.6839	6.75927	6.85664	8.25154	7.16696	5.67796	6.15213		4.12243	4.13178	3.67439	10.516	10.2043	10.579	10.4747	9.36602	10.0755	8.75995	7.70343	6.6609
ENSMUSG00000099971	0.096252	0	0	0.0924306	0	0	0	0.10226	0.311337	0	0	0		0	0	0.104734	0	0	0.0995064	0	0.112684	0	0.235392	0	0.338586
ENSMUSG00000100819	1.19649	0.661786	1.04197	0.0883837	0.270182	0.269381	0.813821	0.586695	0.694648	0.316291	0.730163	0.315232		0.492728	1.09544	1.40208	0.280292	0.28075	0.380599	0.297546	0.646504	0.730032	0.337629	0.451579	0.215841
ENSMUSG00000025933	7.50766	7.63192	7.76686	3.21256	2.96901	3.14995	3.70714	3.7195	3.81671	5.12441	5.20217	4.70755		6.16424	7.28152	7.28039	2.56675	2.88737	2.73462	2.76667	2.64137	3.26179	3.56748	3.14919	3.69462
ENSMUSG00000102633	0.500511	0.539828	0.669658	0.264352	0.146928	0.195322	0.344216	0.478576	0.161895	0.315337	0.283621	0.457136		0.37513	0.568632	0.708003	0.0508084	0.17812	0.206973	0.269681	0.292979	0.368642	0.183606	0.399056	0.293441
ENSMUSG00000025934	1.71791	1.98832	1.22021	0.54603	1.40873	0.259665	0.332806	0.526977	0.339146	0.512759	0.644416	0.49723		1.86529	2.43475	1.5402	0.171935	0.147614	0.112563	0.208593	0.410738	0.246753	0.340246	0.474865	0.453942
ENSMUSG00000099343	0.913254	1.27921	1.2817	0.239181	0.0812396	0.404993	0	0.0882051	0	0.285311	0.282277	0.568712		1.15561	0.988145	1.08407	0.0842794	0.168835	0.17166	0.0894675	0.097197	0	0	0.305512	0.1947
ENSMUSG00000096375	0	0.147494	0.443343	0	0.281009	0.140088	0	0	0	0	0	0		0.153742	0.155364	0	0	0	0	0	0	0	0.17558	0	0.168368
ENSMUSG00000025936	0.0770016	0.158191	0.158499	0.221833	0.188369	0.112686	0.151304	0.0818078	0	0.308721	0.261804	0.395598		0.247339	0.041658	0.125681	0.664418	0.156589	0.119408	0.207447	0.0450738	0.174505	0.0470785	0.141677	0.0451448
ENSMUSG00000093963	0	0	0.123207	0	0	0	0.117614	0	0	0.137131	0.271346	0		0	0	0	0	0	0.12376	0	0	0	0	0	0.14037
ENSMUSG00000067750	0	0	0.0272208	0	0	0	0	0.0561991	0.0285171	0	0	0.0301958		0	0	0.0287795	0	0.0268929	0	0.0285017	0	0.0299697	0	0.0648847	0.0310129
ENSMUSG00000086194	0	0	0	0.13603	0	0.1382	0	0	0	0.162266	0	0.323445		0	0	0	0	0	0	0	0	0	0	0.173755	0
ENSMUSG00000094436	0	0	0	0	0	0	0	0	0	0	0	0		0	0	0	0	0	0	0	0	0	0	0	0
ENSMUSG00000041722	0	0	0	0	0	0	0.0265326	0	0	0	0	0.030832		0	0	0	0	0.0274595	0	0.0291022	0	0.0306011	0	0	0
ENSMUSG00000085507	0	0	0	0	0	0	0	0	0	0	0	0.171426		0	0	0	0	0	0	0	0	0	0	0	0
ENSMUSG00000094926	0	0	0	0	0	0	0	0	0	0	0	0		0	0	0	0	0	0	0	0	0	0	0	0
ENSMUSG00000085079	0	0.0241426	0	0	0	0	0	0.0249704	0	0	0	0.0268332		0	0.0254308	0	0	0	0	0	0	0	0	0	0.0275593
ENSMUSG00000085679	0	0	0	0	0	0	0	0	0	0	0	0		0	0.290119	0	0	0	0	0	0	0	0	0	0
ENSMUSG00000028033	0.539958	0.428268	0.619031	0.525084	0.414661	0.446772	1.73921	1.67741	1.28965	1.47194	1.20841	1.40458		1.11968	1.24243	1.22714	0.679957	0.931258	0.953911	1.67196	1.87242	1.43279	3.10905	2.14625	2.1158
ENSMUSG00000104138	0.15809	0.0695954	0.0929743	0.0216876	0	0.0440671	0.288449	0.455884	0.267854	0.336316	0.179168	0.412542		0.193449	0.317672	0.147447	0.183408	0.160745	0.186783	0.389397	0.449479	0.281499	0.607549	0.443235	0.370742
ENSMUSG00000082935	0.280535	0.19211	0.240604	0.493895	0.320261	0.273695	0.413427	0.149023	0.151237	0.214237	0.476908	0.37366		0.200247	0.20236	0.203505	0.237317	0.570493	0.338357	0.201541	0.273691	0.370862	0.571727	0.344108	0.603068
ENSMUSG00000103748	0.43599	0.620096	0.793886	0.354268	0.393807	0.392639	2.53714	1.92408	1.41026	1.57513	1.52037	2.25906		1.32864	1.34265	1.56921	0.85113	1.02303	1.28285	2.0239	2.23801	2.50816	3.69087	2.87965	2.75276
ENSMUSG00000097109	0	0	0	0	0	0	0	0	0	0.0574708	0	0		0	0	0	0	0	0	0	0	0	0.030674	0	0
ENSMUSG00000099692	0	0	0	0	0	0	0	0	0	0	0	0		0.101938	0.103013	0	0	0	0	0	0	0	0	0	0
ENSMUSG00000100418	0	0	0	0	0	0	0	0	0	0	0	0		0	0	0	0	0	0	0	0	0	0	0	0
ENSMUSG00000041670	0.207016	0.131987	0.205713	0.0685508	0.0838218	0.0278577	0.00701337	0.0227522	0.0384837	0.0163544	0.0404513	0.0325993		0.114649	0.13903	0.0854433	0.0434791	0.058067	0.051659	0.0153852	0.0083572	0.0161776	0	0.0175124	0.00837036
ENSMUSG00000097642	0	0	0	0	0	0	0	0	0	0	0	0		0	0	0	0	0	0	0	0	0	0	0	0
ENSMUSG00000101468	0	0	0	0	0	0	0	0.0606231	0	0	0	0		0	0	0	0	0	0	0	0	0	0	0	0
ENSMUSG00000101227	0	0	0	0.0242864	0	0	0	0.0537381	0.0272682	0.0289705	0	0.0288735		0.0270787	0.0273644	0	0	0	0	0	0	0	0	0.0310216	0.0296548
ENSMUSG00000073730	0	0	0	0	0	0.0287884	0.0289907	0.0940492	0.34997	0	0	0		0	0	0	0	0.0300035	0	0.0317984	0	0	0	0.0361948	0
ENSMUSG00000089553	0	0	0	0	0	0	0	0	0	0	0	0		0	0	0	0	0	0	0	0	0	0	0	0
ENSMUSG00000102766	0.0726883	0	0	0	0	0	0	0	0	0	0	0		0	0	0	0.0737882	0.0739089	0	0.0783305	0	0	0	0	0
ENSMUSG00000065405	8.14211	9.12386	6.8562	6.39724	3.62146	8.66571	7.99939	0.786392	3.99038	2.54369	5.87216	5.9154		8.71781	8.8098	4.83253	4.50835	9.78408	7.65219	3.98824	6.06591	2.51619	5.4306	6.3555	10.4151
ENSMUSG00000097970	7.11252	5.6824	5.96457	6.07123	5.79978	8.7381	5.82321	5.31751	4.68645	4.67724	3.88113	5.26308		5.64105	6.55566	6.73606	6.01679	6.56233	6.536	2.98068	5.39699	5.37291	7.56972	6.94714	9.57544
ENSMUSG00000065567	0	0	0	0	0	0	0	0	0	0	0	0		0	0	0	0	0	0	0	0	0	0	0	0
ENSMUSG00000100775	0.908708	0.62228	0.155873	0.581753	0.296396	1.03431	0.595187	0	0.65318	0.173489	0.171644	0.345816		0.32432	0.163871	0	0.922459	0	0.469716	0.326415	0.531922	0.171613	0.55558	0	0.355173
ENSMUSG00000101226	0	0	0	0	0	0	0	0	0	0	0.0924852	0		0	0	0.0887964	0	0	0	0	0	0	0	0	0
ENSMUSG00000026158	2.46274	2.40989	2.26116	5.85018	5.26994	2.97807	3.13271	3.6837	2.38281	2.7914	2.88658	3.87711		2.61606	2.97324	2.9407	4.48686	4.11858	3.95302	2.89136	2.64039	4.17855	3.66125	3.44216	5.06872
ENSMUSG00000097920	0.106276	0.0545832	0.0546894	0	0.0519967	0.0518424	0.104413	0	0	0	0	0.0606664		0.0568954	0	0.0578209	0	0.162091	0	0	0.06221	0	0.0649769	0.0651799	0
ENSMUSG00000099503	0	0	0	0	0	0.0659025	0	0	0	0	0	0		0	0	0	0	0	0	0	0	0	0	0	0
ENSMUSG00000026156	0.00847229	0.0174054	0.00871962	0	0	0.0165314	0.0249714	0.0540066	0.0365394	0.0873457	0.0576113	0.135416		0.0634994	0.0275012	0.0184378	0.00860049	0.00861457	0.0262762	0.0365197	0.0793496	0.0480008	0.0207197	0.0519611	0.0993432
ENSMUSG00000026155	11.2604	10.4191	11.2412	13.9049	13.2625	12.4631	17.5478	16.6955	13.8053	14.4313	15.3274	15.0879		11.5687	11.9453	11.165	14.5646	14.9771	14.5591	14.5899	15.2136	14.5085	16.0341	16.2645	16.2029
ENSMUSG00000026154	5.53196	5.37358	5.13648	5.02361	3.88333	3.4025	4.90331	4.5357	5.51074	4.6838	4.83844	5.7665		4.63548	4.68439	4.18745	4.15071	3.8518	3.91627	6.54454	5.77243	5.58705	5.95564	4.86791	6.06355
ENSMUSG00000102495	0	0	0	0	0	0	0	0	0	0.154361	0	0		0	0	0	0	0	0	0	0	0	0	0	0
ENSMUSG00000026153	4.69893	5.57677	5.12836	3.46057	3.75778	4.11602	6.82188	6.18461	6.6993	5.4756	5.76985	5.95128		5.24111	5.28909	4.86289	3.6513	4.06288	4.22175	5.95254	8.04195	7.63812	7.04378	7.59656	7.71373
ENSMUSG00000102398	0.0563074	0.0192796	0.0965853	0.0360479	0.0367319	0.0549344	0.0368803	0.0199407	0.0607108	0.0430004	0.0425432	0.0214282		0	0	0.0816927	0	0.0190843	0.0388075	0.0404521	0.0659204	0.0638033	0.0229508	0.0690675	0.0440161
ENSMUSG00000097670	0	0	0	0	0	0	0	0	0	0	0	0		0	0	0	0.0615327	0	0	0	0	0	0	0	0
ENSMUSG00000026147	0.124436	0.0958653	0.138741	0.169286	0.111616	0.293388	0.132443	0.176271	0.279516	0.190057	0.188036	0.213099		0.0222058	0.123421	0.124119	0.0631597	0.115982	0.192966	0.0670477	0.01214	0.0822511	0.17752	0.139916	0.206706
ENSMUSG00000026141	0.129724	0.0470302	0.0942433	0.0146558	0	0.0446686	0.0599767	0.0243214	0.213917	0.0611884	0.034593	0.0261358		0.147067	0.140362	0	0.00774631	0.0387949	0.055222	0.131571	0	0	0	0	0
ENSMUSG00000077463	0	0	0	0	0	0	0	0	0	0	0	0		0	0	0	0	0	0	0	0	0	0	0	0
ENSMUSG00000099997	0.117921	0.0403761	0.0404546	0	0.0384627	0	0	0.0835211	0.042381	0	0	0		0	0.0850609	0.0855421	0.0399019	0.199836	0	0.0847165	0	0	0	0	0
ENSMUSG00000100131	0.119985	0	0	0	0	0	0	0.0637373	0	0	0	0		0	0.0649124	0.0652796	0	0	0.0620211	0	0.14047	0.135958	0.146717	0.0735879	0.140691
ENSMUSG00000067736	0	0	0	0	0	0	0	0	0	0	0	0		0	0	0	0	0	0	0	0	0	0	0	0
ENSMUSG00000101939	0.304659	0.469416	0.313552	0.292563	0.447171	0.148615	0.149659	0.323674	0	0	0.172639	0		0.1631	0.164821	0.663013	0.463903	0.154887	0.31496	0.164153	0	0.172608	0.372534	0.186849	0.178616
ENSMUSG00000101111	0.0671183	0.0689436	0.138155	0	0	0	0.131884	0	0.072367	0	0	0		0.143728	0	0.0730331	0	0.0682454	0	0	0	0	0	0.0823282	0.0787006
ENSMUSG00000100862	0	0	0.0797755	0	0.0758476	0	0	0	0	0	0	0		0	0	0	0.0786856	0	0.0801335	0	0	0.0878315	0	0	0
ENSMUSG00000102070	0.0771712	0	0.0794241	0	0	0.0752894	0	0	0.0832062	0	0.0874603	0		0	0	0	0	0.0784672	0	0	0	0	0.188729	0.0946593	0
ENSMUSG00000101249	0.106816	0	0	0	0	0.104212	0	0	0	0	0	0.121949		0	0	0	0	0	0	0	0	0	0	0.262045	0
ENSMUSG00000073725	23.4992	25.5784	24.9657	17.4772	16.4887	19.9669	15.6024	16.3286	13.1961	17.8178	19.3771	18.3521		21.8847	23.0888	24.2076	17.768	16.5867	17.9947	13.8067	13.2136	13.8783	13.7689	13.6605	14.899
ENSMUSG00000100808	0	0	0	0	0	0	0	0	0	0	0	0		0	0	0	0	0	0	0	0	0	0	0	0
ENSMUSG00000100483	0	0	0	0	0	0.0421646	0	0	0	0	0	0		0	0	0	0	0	0	0	0	0	0	0	0
ENSMUSG00000100450	0	0	0	0	0	0	0	0	0	0	0	0		0	0	0	0	0	0.0665815	0	0	0	0	0	0
ENSMUSG00000099392	0	0	0	0	0	0	0	0	0	0	0	0		0	0	0	0	0	0	0	0	0	0	0	0
ENSMUSG00000033569	0.283171	0.276328	0.241893	0.067982	0.0803554	0.132607	0.169706	0.13538	0.119073	0.0486561	0.051348	0.0872878		0.133405	0.113365	0.120169	0.0718639	0.0662229	0.140518	0.125112	0.0828785	0.137973	0.252769	0.184091	0.1793
ENSMUSG00000080849	0	0	0	0	0	0	0	0	0	0	0	0		0	0	0	0	0	0	0	0	0	0	0	0
ENSMUSG00000104257	0.135535	0.0348052	0.0348729	0	0.0331558	0.0330575	0.0332898	0	0.0365335	0	0	0		0	0	0	0.0343964	0.0344527	0.0350293	0.0730277	0.0793368	0	0.0414327	0.0831244	0.0794618
ENSMUSG00000096866	0	0	0	0	0	0.479179	0	0	0	0	0	0		0	0	0	0.498587	0	0	0	0	0	0	0	0
ENSMUSG00000102296	0	0.157079	0.104923	0.0489497	0.0498785	0	0.10016	0	0.0549596	0.0583905	0	0		0	0	0.166396	0	0	0.210788	0	0	0	0.0623299	0.312624	0.119539
ENSMUSG00000103209	0.202429	0.111964	0.144234	0	0.0304739	0.0759587	0.137686	0.0827168	0.100735	0.0535117	0.0352951	0.0177775		0.100035	0.0505451	0.050831	0.0474212	0.0633317	0.0804897	0.0503404	0.0546895	0.0529331	0.0761625	0.133701	0.146068
ENSMUSG00000104027	0.0765418	0.125797	0.157553	0.0882035	0.029959	0.0298702	0.10528	0.0487916	0.033011	0	0.0173494	0.0349543		0.0491723	0.0662549	0.0166574	0.03108	0.0466963	0.0474779	0.0329933	0.125453	0.0867314	0.149752	0.168997	0.161551
ENSMUSG00000102407	0.124485	0.127871	0.170826	0.0796954	0.0812076	0.12145	0.0611517	0.220426	0.11185	0	0.0235138	0.023687		0.133287	0.0673469	0.0903038	0.0210615	0.10548	0.0857963	0.0894322	0.0728689	0.0705288	0.12685	0.0763478	0.0486558
ENSMUSG00000103214	0.287733	0.191244	0.209035	0.0162535	0.0662476	0.115589	0.116402	0.0899096	0.0182491	0.0581649	0.0575463	0.0193234		0.108733	0.109881	0.0920852	0.085908	0.103258	0.0874888	0.0911964	0.0792601	0.0767147	0.206963	0.186849	0.31754
ENSMUSG00000104100	0.129085	0.215467	0.116246	0.015495	0.015789	0.0472264	0.063411	0.0342854	0.0521923	0.0369669	0.0914345	0		0.034553	0.122211	0.0526726	0	0.0656262	0.133449	0.104328	0.0755612	0.0731345	0.197305	0.197921	0.0946002
ENSMUSG00000084740	0	0	0	0	0	0	0	0	0	0	0	0		0	0	0	0	0	0	0	0	0	0	0	0
ENSMUSG00000103889	0.0537175	0.0183928	0.0921427	0.0687797	0.0175212	0	0.0879599	0.0380469	0.0193061	0.0410226	0.0405863	0.0204426		0.0191719	0	0.0389676	0.0363536	0.0546196	0.0925562	0.0192957	0.0419255	0.0811581	0.0437902	0.153745	0.0419915
ENSMUSG00000101301	0.184399	0.378827	0	0.0885388	0.0902188	0.0899511	0.181166	0.195908	0.397638	0.21123	0	0.105262		0	0.0997601	0.100324	0.0935945	0.0937476	0	0.0993561	0	0.104473	0.112741	0.452372	0.10811
ENSMUSG00000104221	0.160714	0.183428	0.128649	0.0342964	0.0524207	0.0348434	0.0701766	0.0189717	0.0385072	0	0	0		0.0573593	0.0966076	0.0582924	0.0181274	0.018157	0.0738437	0.0192433	0.0836231	0.0607031	0.109178	0.109519	0.146571
ENSMUSG00000102250	0.328871	0.175664	0.203083	0.126326	0.0643613	0.0641704	0.155091	0.181687	0.113469	0.060276	0.0745438	0.120148		0.0845099	0.0854016	0.0572565	0.106831	0.0936303	0.0815978	0.0992317	0.0616027	0.0745304	0.25737	0.322718	0.200524
ENSMUSG00000102317	0.415405	0.14885	0.338049	0.120602	0.0472653	0.122525	0.246773	0.153954	0.114577	0.0331989	0.0218972	0.0330877		0.103437	0.0940752	0.0420477	0.0588406	0.166988	0.159796	0.0936942	0.0565493	0.153253	0.283509	0.248846	0.169915
ENSMUSG00000103563	0.268424	0.196946	0.13813	0.0184119	0.0938064	0.0935281	0.207208	0.203699	0.103363	0.043926	0.0217295	0		0.0821153	0.0207454	0.0625883	0.0389266	0.0779805	0.0991071	0.0619843	0.0897857	0.173805	0.257893	0.141108	0.179854
ENSMUSG00000102465	0.264162	0.226122	0.0906246	0.0704651	0.0861626	0.0859069	0.18744	0.202692	0.110763	0.0336222	0.0831618	0.0670193		0.0628534	0.0635166	0.143721	0.0446933	0.119377	0.106203	0.142334	0.0859057	0.199552	0.376851	0.12601	0.223707
ENSMUSG00000102659	0.113907	0.117004	0.102578	0.027346	0.0557298	0.0694556	0.125899	0.030254	0.107462	0.0326202	0.0161367	0.065022		0.0762253	0.0462177	0.0464792	0.0144538	0.0289548	0.0735986	0.122748	0.0500073	0.0645351	0.191515	0.122254	0.116868
ENSMUSG00000103924	0.48511	0.308473	0.380398	0.110917	0.101719	0.236641	0.260999	0.20861	0.174349	0.0926164	0.157083	0.118679		0.136036	0.187461	0.175953	0.0938002	0.176163	0.226875	0.27383	0.216354	0.170142	0.550818	0.283354	0.297955
ENSMUSG00000104132	0.231961	0.148918	0.238732	0.111376	0.0567445	0.198016	0.199408	0.184829	0.109419	0.0996424	0.0492914	0.0993088		0.108658	0.109805	0.0631006	0.0588677	0.073705	0.224816	0.124983	0.271562	0.0985652	0.248185	0.24896	0.339987
ENSMUSG00000102747	0.127018	0.130472	0.163407	0.121975	0.108753	0.0774503	0.124791	0.118078	0.0684754	0.07275	0.0539823	0.0543798		0.118999	0.154613	0.120935	0.0805874	0.0968631	0.114898	0.171097	0.0743513	0.107945	0.252389	0.194752	0.390959
ENSMUSG00000102386	0.258376	0.106161	0.372286	0.0496235	0.151695	0.151245	0.355385	0.329403	0	0	0.11713	0.0589961		0.110658	0.0559127	0.056229	0.104914	0.0525429	0.106845	0.111373	0.120994	0	0.189564	0.316927	0.363555
ENSMUSG00000103004	0.637014	0.163584	0.163902	0	0	0.15537	0.156462	0	0.171707	0.182426	0	0.363631		0	0	0	0	0.161928	0.164638	0.171615	0	0.180454	0.778935	0	0.186735
ENSMUSG00000104516	0.0430062	0	0	0	0.0841648	0	0	0	0	0	0	0.0981982		0	0	0.0935923	0.043657	0	0	0.0463445	0.0503483	0	0.105175	0.052752	0
ENSMUSG00000101618	0	0	0	0	0	0	0	0	0	0	0	0		0	0	0	0	0	0	0	0	0	0	0	0
ENSMUSG00000099458	0	0	0	0	0	0	0	0	0	0	0	0		0	0	0	0	0	0	0	0	0	0	0	0
ENSMUSG00000088111	0	0	0	0	0	0	0	0	0	0	0	0		0	0	0	0	0	0	0	0	0	0	0	0
ENSMUSG00000073722	0	0	0	0	0	0	0.0119575	0	0.0131226	0	0	0		0	0	0	0	0	0	0.0131156	0	0	0	0	0
ENSMUSG00000095256	0	0	0	0	0	0	0	0	0	0	0	0		0	0	0	0	0	0	0	0	0	0	0	0
ENSMUSG00000100310	0	0	0	0	0	0	0	0	0	0	0	0		0	0	0	0	0	0	0	0.147544	0	0	0	0
ENSMUSG00000101514	0	0	0	0	0	0	0	0	0	0	0	0		0	0	0	0.0266478	0	0	0	0	0	0	0	0
ENSMUSG00000101033	0	0	0	0	0	0	0	0	0	0	0	0		0	0	0	0	0	0	0	0	0	0	0	0
ENSMUSG00000101372	0.056117	0.0288216	0.0288776	0.0538891	0	0	0	0	0.0302527	0.0642826	0	0		0.0300425	0.0910783	0.0305312	0.0284831	0.0570594	0.0290072	0.0907095	0.0328487	0	0	0	0.0329005
ENSMUSG00000103241	0	0	0	0	0	0	0	0	0	0	0	0		0	0	0	0	0	0	0	0	0	0	0	0
ENSMUSG00000086240	0	0	0	0.184187	0	0	0	0	0	0	0	0		0	0	0	0	0	0	0	0	0	0	0	0
ENSMUSG00000048411	0	0.0186986	0	0	0	0	0.0894223	0.077359	0.0392542	0.0417046	0.0206306	0.0623475		0.760136	0.649978	0.237693	0.110874	0.148074	0.207009	0.372714	0.703272	0.350657	1.60266	0.826162	0.875139
ENSMUSG00000081557	0.0211739	0.0434995	0	0.0203332	0.124314	0.0206576	0.0416055	0.044991	0.136978	0.0485098	0.0959879	0.0241737		0.204039	0.366564	0.161279	0.107471	0.0861179	0.0437796	0.205357	0.123944	0.071978	0.258913	0.363611	0.297934
ENSMUSG00000058590	0	0	0	0	0	0	0	0	0	0	0	0		0	0	0	0	0	0	0	0	0	0	0	0
ENSMUSG00000101235	0	0	0	0	0	0	0	0	0	0	0	0		0	0	0	0	0	0	0	0	0	0	0	0
ENSMUSG00000064433	0	0	0	0	0	0	0	0	0	0	0	0		0	0	0	0	0	0	0	0	0	0	0	0
ENSMUSG00000080625	0	0	0	0	0	0	0	0	0	0	0	0		0	0	0	0	0	0	0	0	0	0	0	0
ENSMUSG00000080391	0	0	0	0	0	0	0	0	0	0	0	0		0	0	0	0	0	0	0	0	0	0	0	0
ENSMUSG00000099257	0	0	0	0	0	0	0	0	0	0	0	0		0	0	0	0	0	0	0	0	0	0	0	0
ENSMUSG00000099492	0.0400561	0.164582	0.0824509	0.192329	0.156783	0.117238	0.039354	0.0425563	0	0.137654	0.0453967	0.045731		0.0857767	0.0866818	0	0.203311	0.122186	0.165642	0.0431654	0.0468946	0.0907771	0.0979606	0.0491334	0.140905
ENSMUSG00000101726	0	0	0	0	0	0	0	0	0	0	0.0957564	0		0	0.09142	0	0	0	0	0	0.0989159	0	0	0.103638	0.0990717
ENSMUSG00000096829	0	0	0	0	0	0	0	0	0	0	0	0		0	0	0	0	0	0	0	0	0	0	0	0
ENSMUSG00000098883	0	0	0	0	0	0	0	0	0	0	0	0		0	0	0	0	0	0	0	0	0	0	0	0
ENSMUSG00000053185	0	0.0464968	0	0	0	0	0	0	0	0	0	0		0	0	0	0	0	0	0	0	0	0	0	0
ENSMUSG00000100261	0.0434327	0.178456	0.134102	0.0417084	0.127499	0.0423736	0.256029	0.0922874	0.0936585	0.149258	0.0492235	0.099172		0.232519	0.0939888	0.0472602	0.17636	0.220811	0.179605	0.0936082	0.203391	0.0984294	0.212437	0.213101	0.101856
ENSMUSG00000101180	0	0	0	0	0.156783	0	0	0	0	0	0	0		0	0	0	0	0	0	0	0.187578	0	0	0	0
ENSMUSG00000048874	8.42932	8.74605	8.43526	8.75973	8.52005	7.34214	10.1118	9.53386	8.9168	9.42252	10.2919	9.01889		9.1324	9.51327	9.11573	9.01178	8.95121	9.00914	9.92174	10.6575	10.2565	10.7873	11.557	10.861
ENSMUSG00000103783	2.33248	2.24616	2.45683	1.85489	1.74744	1.83115	2.52433	2.9427	2.57382	2.58838	2.66411	2.66293		2.18522	2.89837	2.08197	1.96081	2.16783	2.29831	2.88663	3.11468	2.4778	2.69616	2.8387	2.32901
ENSMUSG00000104315	2.28569	2.31228	2.45935	2.59403	2.32131	2.14549	3.24936	3.20102	2.72582	2.91581	2.86518	3.28166		2.50293	2.88532	3.07121	2.88277	2.27126	2.7568	3.09755	3.60843	3.43368	3.6207	3.6745	3.43137
ENSMUSG00000026064	0.369895	0.36047	0.468546	0.491829	0.510442	0.721751	0.484549	0.473595	0.51131	0.347667	0.376217	0.368159		0.43667	0.389966	0.495375	0.760613	0.790789	0.705973	0.459932	0.499667	0.505115	0.521891	0.523522	0.500454
ENSMUSG00000117310	0	0	0	0	0.0124064	0	0	0.0134702	0	0	0	0		0	0.0137185	0	0	0.0257834	0	0	0	0.0143667	0	0	0
ENSMUSG00000117091	0	0	0	0	0	0	0	0	0	0	0	0		0	0	0	0	0	0	0	0	0	0	0	0
ENSMUSG00000086726	0	0	0.0741945	0	0	0	0	0	0	0.165159	0.0817016	0		0	0.156003	0.0784429	0	0	0	0	0	0	0	0	0.0845303
ENSMUSG00000086727	0.0560422	0.0431747	0.129776	0.0403629	0	0	0.013765	0	0	0.0160492	0	0.0159955		0.0450036	0.030319	0.0152452	0.0568903	0.0569834	0	0	0	0	0	0	0.0164283
ENSMUSG00000100237	0	0	0	0.0862686	0	0	0	0	0	0	0	0		0	0	0	0	0	0	0	0	0	0	0	0
ENSMUSG00000098529	0	0	0	0	0	0	0	0	0	0	0	0		0	0	0	0	0	0	0	0	0	0	0	0
ENSMUSG00000100910	0	0.0188883	0.0189251	0	0	0	0	0	0	0	0	0.0209934		0	0	0.0200087	0	0	0.01901	0	0	0	0	0	0
ENSMUSG00000099796	0.233572	0.239924	0.24039	0.224298	0.228554	0	0	0	0.503675	0	0	0		0	0	0.254155	0.237106	0	0	0	0.273447	0	0	0	0
ENSMUSG00000050217	0	0	0	0	0	0	0	0	0	0	0	0		0	0	0	0	0	0	0	0	0	0	0	0
ENSMUSG00000026063	0	0	0	0	0	0	0	0	0	0	0	0		0	0	0	0	0	0	0	0	0	0	0	0
ENSMUSG00000077664	0	0	0	0	0	0	0	0	0	0	0	0		0	0	0	0	0	0	0	0	0	0	0	0
ENSMUSG00000100205	0	0	0	0	0	0	0	0	0	0	0	0		0	0	0	0	0.0955924	0	0	0	0	0	0	0
ENSMUSG00000100592	0	0	0	0	0	0	0	0	0	0	0	0		0	0	0	0	0	0	0	0	0	0	0	0
ENSMUSG00000094215	0	0	0	0	0	0	0	0	0	0	0	0		0	0	0	0	0	0	0	0	0	0	0	0
ENSMUSG00000101093	0.0393071	0	0.0404546	0	0.0384627	0	0	0	0.042381	0.13508	0	0.0448759		0.0841728	0	0.042771	0	0	0.0406361	0	0	0	0.0480644	0.0482146	0.138271
ENSMUSG00000070960	0.0694694	0	0.0714974	0.100067	0.135954	0.0677754	0.170629	0.0738055	0.037451	0	0.118097	0.0396557		0.148763	0.0375831	0.113387	0	0	0.179546	0.0748618	0	0	0.212367	0.0426061	0.122186
ENSMUSG00000088620	0	0	0	0	0	0	0	0	0	0	0	0		0	0	0	0	0	0	0	0	0	0	0	0
ENSMUSG00000082159	0	0	0	0.0604397	0	0	0	0	0	0	0	0		0	0	0	0	0	0	0	0	0	0	0	0
ENSMUSG00000026058	0.00510675	0	0.00525583	0.014712	0	0.00498223	0	0.0054255	0.00550611	0	0.00578763	0.0116605		0	0	0.0111136	0	0.00519251	0	0.00550315	0.00597859	0	0.012489	0	0.011976
ENSMUSG00000064688	0	0	0	0	0	0	0	0	0	0	0	0		0	0	0	0	0	0	0	0	0	0	0	0
ENSMUSG00000103482	0	0	0	0	0	0	0	0	0	0	0	0		0	0	0	0	0	0	0	0	0	0	0	0
ENSMUSG00000104498	0	0	0	0	0	0	0	0	0	0	0	0		0	0	0	0	0	0.0333726	0	0	0	0	0	0
ENSMUSG00000104313	0	0	0	0	0	0	0	0	0	0.0389648	0	0		0	0	0	0	0	0	0	0	0	0	0	0
ENSMUSG00000102865	0	0	0	0	0	0	0	0	0	0	0	0		0	0	0	0	0	0	0	0	0	0	0	0
ENSMUSG00000102321	0	0	0	0	0	0	0	0.0163592	0	0	0	0		0	0	0	0	0	0	0	0	0	0	0	0
ENSMUSG00000091318	0	0	0	0	0	0	0	0	0	0	0	0		0	0	0	0	0	0	0	0	0	0	0	0
ENSMUSG00000089489	0	0	0	0	0	0	0	0	0	0	0	0		0	0	0	0	0	0	0	0	0	0	0	0
ENSMUSG00000104433	0	0	0	0	0	0	0	0	0	0	0	0		0	0	0	0	0	0	0	0	0	0	0	0
ENSMUSG00000089395	0	0	0	0	0	0	0	0	0	0	0	0		0	0	0	0	0	0	0	0	0	0	0	0
ENSMUSG00000102926	0	0	0	0	0	0	0	0	0	0	0	0		0	0	0	0	0	0	0	0	0	0	0	0
ENSMUSG00000100497	0	0	0	0	0	0	0	0	0	0	0	0		0	0	0	0	0	0	0	0	0	0	0	0
ENSMUSG00000102917	0	0	0	0	0	0	0	0	0	0	0	0		0	0	0	0	0	0	0	0	0	0	0	0
ENSMUSG00000100481	0	0.150874	0	0	0	0	0	0	0	0.0336504	0.0665852	0		0.0943592	0	0.0958942	0	0	0	0	0	0	0.0359207	0	0
ENSMUSG00000100590	0	0	0	0	0	0	0	0	0	0	0	0		0	0	0	0	0	0	0	0	0	0	0	0
ENSMUSG00000088750	0	0	0	0	0	0	0	0	0	0	0	0		0	0	0	0	0	0	0	0	0	0	0	0
ENSMUSG00000104230	0	0	0	0	0	0	0	0	0	0	0	0		0	0	0	0	0	0	0	0	0	0	0.0991738	0
ENSMUSG00000101754	0	0	0	0	0	0	0	0	0	0	0	0		0	0	0	0	0	0	0	0	0	0	0	0
ENSMUSG00000065223	0	0	0	0	0	0	0	0	0	0	0	0		0	0	0	0	0	0	0	0	0	0	0	0
ENSMUSG00000100318	0.0575615	0	0	0	0	0	0	0	0	0	0	0		0	0	0.125268	0	0	0	0	0	0	0.0703857	0	0
ENSMUSG00000101612	0	0	0	0	0	0	0	0	0	0.0266965	0	0.0266071		0	0	0	0	0	0	0	0	0	0	0	0
ENSMUSG00000065260	0	0	0	0	0	0	0	0	0	0	0	0		0	0	0	0	0	0	0	0	0	0	0	0
ENSMUSG00000026134	1.61962	1.47275	1.57581	3.4591	3.84516	2.92712	2.65205	2.10623	1.92759	1.63225	2.46748	1.85918		1.54462	1.86735	1.52159	3.17146	3.24864	3.12002	2.25082	2.18624	2.30658	2.0995	1.94323	1.96138
ENSMUSG00000101682	0.125726	0	0.38819	0.120735	0.246051	0.245321	0	0.133574	0	0.288041	0	0.143538		0.269232	0.136036	0.136806	0	0	0.129977	0.135486	0	0.142464	0	0	0.147422
ENSMUSG00000102714	0.358903	0.509106	0.422149	0.886252	0.919791	0.833693	0.705223	0.744451	0.700231	0.606901	0.581078	0.682916		0.603868	0.684208	0.520708	0.780715	0.973146	0.777412	0.681437	0.800334	1.00702	0.982218	1.13203	0.581156
ENSMUSG00000102093	0	0	0	0	0	0	0	0	0	0	0	0		0	0	0	0.162649	0	0	0	0	0	0	0.196533	0
ENSMUSG00000103746	0.118231	0.182169	0	0.113537	0	0.115348	0.290396	0.0628052	0.254953	0.270869	0.46898	0.202472		0.0632953	0.127926	0.192975	0.06001	0.120216	0.183343	0	0.138415	0.334926	0.144572	0.145024	0.138634
ENSMUSG00000102198	0.0454223	0	0	0.0218095	0	0	0	0	0	0.0260158	0	0		0	0	0	0	0	0	0	0	0.0257346	0.027771	0	0
ENSMUSG00000004768	2.06789	2.31308	2.36981	2.55838	2.73727	2.72915	2.52398	2.36544	2.81094	2.87742	3.07687	2.35361		2.68953	2.59436	2.71947	2.12494	2.50895	2.66898	2.42664	2.79966	2.68819	3.14912	3.12005	2.56606
ENSMUSG00000042215	1.09952	1.21766	1.06089	1.35283	1.3785	1.27384	0.692033	0.748345	1.09289	0.688794	0.837234	0.764944		1.26924	1.09674	1.12164	1.36032	1.62457	1.43863	1.11081	1.02576	0.700815	1.32348	1.22225	1.14825
ENSMUSG00000103072	0	0	0	0	0	0	0	0	0	0	0	0		0	0	0	0	0	0	0	0	0	0	0	0
ENSMUSG00000042197	6.09846	6.2166	6.73067	7.51319	7.47069	8.65272	9.75993	10.6845	10.2172	8.85963	9.43852	8.52692		6.97729	7.4171	6.84529	9.03013	9.32155	9.85832	9.86134	11.2727	10.8166	12.6909	13.337	12.1969
ENSMUSG00000081402	0.0616585	0.0844471	0	0.0789474	0.120668	0.0802067	0.0807703	0.0655071	0.0886404	0.0941738	0.0465862	0		0.132036	0.0667148	0.0223641	0.0625915	0.125388	0.084991	0.0664446	0.0240617	0	0.175923	0.100842	0.0481991
ENSMUSG00000042182	0.491586	0.362936	0.458505	0.472069	0.721539	0.494586	0.347134	0.424344	0.298141	0.193571	0.470077	0.263077		0.213827	0.249327	0.250738	0.530214	0.671662	0.730548	0.463526	0.233801	0.435178	0.300554	0.414553	0.234169
ENSMUSG00000104416	0.0645622	0.099477	0	0.154997	0.0947629	0.15747	0	0	0.0696111	0.110935	0.0365851	0.0368545		0.0345636	0.104785	0	0.0983087	0.0656464	0.13349	0.208721	0.0377922	0.0365785	0.0394731	0.0395964	0.0757034
ENSMUSG00000026131	41.647	42.2169	40.693	31.5249	32.5554	39.22	57.5691	56.1594	50.403	61.6268	51.5197	52.9167		45.1072	48.4557	45.9563	40.85	42.301	45.1093	56.8366	80.1276	68.2981	67.8629	65.1929	56.7548
ENSMUSG00000103596	0.176354	0.158507	0.113439	0.423382	0.301991	0.344108	0.0866316	0.117101	0.166377	0.176764	0.224851	0.10067		0.118015	0.214668	0.0479739	0.358046	0.313803	0.227896	0.0712663	0.154846	0.0999158	0.188689	0.189279	0.15509
ENSMUSG00000099382	0	0	0	0	0	0	0	0	0	0	0	0		0	0	0	0	0	0	0	0	0	0	0	0
ENSMUSG00000084506	0	0	0	0	0	0	0	0	0	0	0	0		0	0	0	0	0	0	0	0	0	0	0	0
ENSMUSG00000103364	5.1068	4.83238	4.58695	5.02293	4.48225	5.70697	8.93989	8.48359	7.84211	8.04802	6.98029	6.537		6.06438	6.56372	6.49981	6.12663	7.17517	7.71122	7.47101	11.1239	8.97806	9.38575	10.0605	8.41958
ENSMUSG00000105982	2.87965	2.21847	2.22279	2.07399	4.22669	0.702358	4.95106	3.82424	3.88105	4.12333	2.44769	3.28762		0.770815	0.778948	1.56671	0.730806	0.732002	4.46552	1.55159	2.52845	4.8945	8.80303	7.94749	5.90902
ENSMUSG00000096992	0.0109899	0.045155	0.0113107	0.0527678	0.0645228	0.0750533	0.0323917	0.070055	0.0118493	0.025178	0	0.0627343		0.0706017	0.0356733	0.0119584	0.122718	0.234663	0.170422	0.0355288	0.0771966	0.0498116	0.0671917	0.202205	0.128864
ENSMUSG00000103001	0	0.0432902	0	0	0	0	0	0.0447745	0	0.0965527	0	0		0	0	0	0.0427818	0	0	0	0	0	0	0	0
ENSMUSG00000104397	0	0	0	0	0	0	0	0	0	0	0	0		0	0	0	0	0	0	0	0	0	0	0	0
ENSMUSG00000102839	0	0	0	0	0	0	0	0	0	0	0	0		0	0	0	0	0	0	0	0	0	0	0	0
ENSMUSG00000101206	0.0904537	0	0.0465472	0	0	0	0	0	0	0	0.0512569	0		0	0	0.0492125	0	0	0	0	0	0	0	0	0
ENSMUSG00000101462	0.0894682	0.073521	0.055248	0.326481	0.332676	0.19203	0.1758	0.38021	0.0964648	0.143481	0.263632	0.16343		0.134112	0.096805	0.0973525	0.217973	0.145553	0.221984	0.269956	0.251382	0.202757	0.240682	0.263383	0.209815
ENSMUSG00000102336	0.847504	0.758501	0.803156	2.99757	2.47968	1.59637	2.03628	2.18414	1.6828	1.68212	1.35991	1.39867		0.808599	0.817131	0.693925	2.0699	2.1842	2.12534	2.60423	2.71133	2.17738	1.88795	1.52331	1.54475
ENSMUSG00000092852	0	0	0	0	0	0	0	0	0	0	0	0		0	0	0	0	0	0	0	0	0	0	0	0
ENSMUSG00000042111	2.43859	2.22894	2.21201	4.96138	4.3073	4.55663	3.2689	2.89818	2.60701	3.12485	2.78714	2.85485		2.23485	2.14663	2.76592	4.76217	4.64388	4.18749	2.5388	2.85491	2.4588	2.77972	3.16865	2.30206
ENSMUSG00000101711	0	0	0	0	0	0	0	0	0	0	0	0		0	0	0	0	0	0	0	0	0	0	0	0
ENSMUSG00000026127	3.55765	3.59759	3.87651	5.63499	5.71185	5.34721	4.3344	4.17791	3.64374	4.08235	3.56541	3.5145		3.59209	3.27098	3.53018	6.05656	6.04772	5.43115	3.70137	3.86289	4.06607	4.38783	4.11514	3.57358
ENSMUSG00000026126	0.696182	0.565439	0.491556	2.58088	1.49711	0.924035	1.04983	0.765436	0.785537	0.964397	1.01836	1.02586		0.416041	0.50802	0.449234	1.57778	1.30051	0.987523	1.17767	0.720264	0.871416	0.801792	0.615635	0.749875
ENSMUSG00000100280	0.283602	0.156862	0.134714	0.607533	0.362897	0.148985	0.235765	0.370835	0.258737	0.299879	0.173069	0.124531		0.163506	0.188836	0.0949521	0.287893	0.221819	0.180425	0.305616	0.332019	0.197758	0.133379	0.214074	0.383702
ENSMUSG00000101223	0	0.0415892	0	0.116642	0.0396184	0.0395009	0.0795569	0.0430153	0.0436544	0.0463795	0.0917727	0.0924485		0	0	0	0.0411008	0.0823361	0	0.130893	0	0.0458781	0	0	0.0949501
ENSMUSG00000026125	0	0	0	0	0	0	0	0.0418859	0.0425082	0	0	0		0	0	0	0	0	0	0	0	0	0	0	0
ENSMUSG00000101116	0	0	0	0	0	0	0	0	0	0	0	0		0	0	0	0	0	0	0	0	0	0	0	0
ENSMUSG00000026124	0	0	0	0	0	0	0	0	0	0	0	0		0	0	0	0	0	0	0	0	0	0	0	0
ENSMUSG00000101803	0	0	0	0	0	0	0.1087	0	0	0	0	0.126314		0	0	0	0	0	0	0	0	0	0	0	0
ENSMUSG00000037529	0	0	0	0	0	0	0	0	0	0	0	0		0	0	0	0	0	0	0	0	0	0	0	0
ENSMUSG00000045815	0	0	0	0	0	0	0	0	0	0	0	0		0	0	0	0	0	0	0	0	0	0	0	0
ENSMUSG00000045174	0.0598288	0.0122912	0	0.0114907	0.0234174	0	0	0	0	0	0	0.013661		0	0	0	0.0121468	0	0	0	0	0	0.0146316	0	0
ENSMUSG00000100524	0	0	0	0	0	0	0	0	0	0	0	0		0	0	0	0	0	0	0	0	0	0	0	0
ENSMUSG00000102499	0	0	0	0	0	0	0	0	0	0	0	0		0	0	0	0	0	0	0	0	0	0	0	0
ENSMUSG00000103521	0	0	0	0	0	0	0	0	0	0	0	0		0	0	0	0	0	0	0	0	0	0	0	0
ENSMUSG00000104098	0	0	0	0	0	0	0	0	0	0	0	0		0	0	0	0	0	0	0	0	0	0	0	0
ENSMUSG00000037509	0.138565	0.202552	0.148096	0.225185	0.166879	0.145586	0.43459	0.277442	0.304549	0.311351	0.25972	0.249464		0.159776	0.161461	0.133379	0.178533	0.184244	0.143251	0.241211	0.155982	0.314024	0.293256	0.30071	0.243716
ENSMUSG00000102537	0	0	0	0	0	0	0	0	0	0	0	0		0	0	0	0	0	0	0	0	0	0	0	0
ENSMUSG00000102612	0	0	0	0	0	0	0	0	0	0	0	0		0	0	0	0	0	0	0	0	0	0	0	0
ENSMUSG00000104002	0.845311	0.762409	0.594138	0.930543	0.968374	1.04596	1.25587	1.22664	1.2004	1.60598	1.07485	0.847378		0.81678	1.04848	0.942238	1.52784	1.80287	1.25755	0.755402	1.59305	1.47181	1.33617	1.74498	0.894483
ENSMUSG00000037503	23.8853	24.7417	26.1164	33.4675	34.4671	31.0344	34.5667	32.8862	30.2588	32.9437	34.0998	31.1089		27.2237	26.8681	27.6118	34.5096	36.3681	34.6866	32.695	35.9676	33.8997	35.2032	34.745	30.7109
ENSMUSG00000104358	0.0173101	0.0177809	0	0.0166229	0.0338766	0	0	0.0183906	0	0	0	0		0	0	0	0.0175721	0	0	0	0	0	0.0635001	0.0424657	0.0202973
ENSMUSG00000026123	8.27093	8.27282	7.52367	8.18898	8.21559	6.4387	7.53121	7.2772	7.08026	7.69561	7.34532	6.85103		7.05923	7.2405	6.57265	6.96668	7.03829	6.96562	6.21849	5.41537	6.39711	5.32635	5.62548	5.0227
ENSMUSG00000103716	0	0	0	0	0	0	0	0	0	0.0281706	0	0		0	0	0	0	0	0	0	0	0	0	0	0
ENSMUSG00000103548	0.229492	0	0.236191	0	0.224562	0.223896	0.225469	0	0	0.262885	0.260089	0		0	0.993244	0.249716	0	0	0	0	0	0	0.561241	0	0
ENSMUSG00000103760	0.120536	0	0	0	0	0	0	0	0	0	0	0.137613		0.129059	0	0	0	0	0	0	0	0	0	0.147851	0
ENSMUSG00000103997	0	0	0	0	0	0	0	0	0	0	0	0		0	0	0	0	0	0	0	0	0	0	0	0
ENSMUSG00000077231	0	0	0	0	0	0	0	0	0	0	0	0		0	0	0	0	0	0	0	0	0	0	0	0
ENSMUSG00000104417	0	0	0	0	0	0	0	0	0	0	0	0		0	0	0	0	0	0	0	0	0	0	0.100723	0
ENSMUSG00000064601	0	0	0	0	0	0	0	0	0	0	0	0		0	0	0	0	0	0	0	0	0	0	0	0
ENSMUSG00000101714	0	0	0	0	0	0	0	0	0	0	0	0		0	0	0	0	0	0	0	0	0	0	0	0
ENSMUSG00000102531	0	0	0.191123	0	0.181713	0	0.182447	0.295939	0	0	0	0		0.298248	0.100465	0.101033	0	0.28323	0.0959903	0.200116	0	0.210423	0	0	0.326622
ENSMUSG00000103096	0	0	0	0	0	0	0	0	0	0	0	0		0	0	0	0	0	0	0	0	0.0658737	0	0	0
ENSMUSG00000102279	0.113507	0.116594	0.233641	0	0.222137	0.110739	0.334551	0.241183	0.734299	0.390069	0.900482	0.647938		0.243065	0.368444	0.123509	0	0	0.352034	0.733904	1.06308	1.41479	0.138795	0.556916	0.133094
ENSMUSG00000103708	0	0	0	0	0	0	0	0	0	0	0	0		0	0	0	0	0	0	0	0	0	0	0	0
ENSMUSG00000104201	0	0	0	0	0	0	0	0	0	0	0	0		0	0	0	0	0	0	0	0	0	0	0	0
ENSMUSG00000102434	0	0	0	0	0	0	0	0	0	0	0	0		0	0	0	0	0	0	0	0	0	0	0	0
ENSMUSG00000045216	2.75949	3.35079	3.54274	4.7717	5.25196	5.23638	10.3693	9.48027	8.74183	8.76613	8.3505	7.60003		3.87856	3.56037	3.61146	5.04417	5.91057	5.64677	9.2072	10.7576	10.67	11.4447	8.43299	8.78417
ENSMUSG00000104523	0	0	0	0	0	0	0	0	0	0	0	0		0	0	0	0	0	0	0	0	0	0	0	0
ENSMUSG00000102202	0.0363274	0.0124384	0.0124626	0.0465135	0.023698	0.0354416	0.0713812	0.0128649	0.0522243	0.0416133	0.0823417	0.041474		0.0259307	0.0655106	0.0658812	0.0368771	0.0369374	0.0751113	0.0391472	0.0708821	0.0274423	0.0592278	0.0297064	0.056795
ENSMUSG00000037470	8.87683	8.48824	8.75723	16.9114	17.0362	13.1242	14.6988	12.8801	11.3168	12.3886	11.7193	11.9737		10.0342	9.83482	9.36101	16.9099	17.2577	15.619	13.8267	12.4459	13.1998	13.1294	12.8344	13.247
ENSMUSG00000098752	2.54292	0	1.74477	0	0.829431	0	0	1.80109	0	0	0.960653	2.90318		0.907573	0	0	3.44186	0.861873	0	0.913435	1.9847	0.96048	3.10946	0	0.993913
ENSMUSG00000047180	1.63362	1.2921	1.39549	9.2557	7.09747	3.76134	7.68789	6.83821	6.04151	6.99877	5.38766	8.05707		1.55673	1.27266	1.58205	8.12587	6.4615	6.40077	7.71067	5.48892	5.70138	3.83535	3.78722	4.1567
ENSMUSG00000037447	1.63444	1.75207	1.98839	5.19964	5.04405	5.71189	3.5698	3.41058	2.76539	2.74599	2.13259	2.50235		2.52181	2.21739	2.45339	8.33842	8.23275	7.647	5.69491	8.85597	7.50783	5.28343	4.65737	3.96075
ENSMUSG00000102762	0.0737077	0.0757122	0	0.212344	0.432746	0.0719104	0	0.0783083	0.0794718	0.0844329	0.083535	0.0841502		0.157839	0.0797521	0.0802032	0.149646	0.0749455	0	0	0.172583	0	0	0.0904109	0
ENSMUSG00000010453	10.6869	12.0104	12.2263	12.5232	12.3108	12.837	14.3594	13.6396	13.4136	14.5278	13.8433	12.2454		12.6193	12.4657	12.2054	12.6211	13.7197	12.9178	13.3308	16.7913	15.1215	15.9178	15.4608	12.723
ENSMUSG00000098680	0	0	0	0	0.667853	0	1.3411	0	0	0.781826	0	0		0.730773	0.738484	0.742661	0.692842	0	0	0.735493	1.59807	0	0.834573	0	0
ENSMUSG00000037432	0	0.0169864	0.00850972	0	0	0	0	0.00878443	0.0178299	0	0.00937075	0.00943975		0.00885298	0.00894639	0.017994	0.0167869	0	0	0	0.0483997	0.00936907	0	0.0202841	0
ENSMUSG00000001143	2.33524	2.48678	3.1237	2.61971	2.63448	2.62666	3.03101	3.8391	3.80374	3.85304	3.52879	3.2368		3.16559	2.36447	2.37785	2.38508	2.56325	2.67998	3.13217	3.5449	3.69	4.52341	4.0908	3.0648
ENSMUSG00000037408	2.12217	2.0122	2.62095	4.54612	4.34485	3.62058	2.94034	2.65931	2.76922	3.09169	2.82447	2.44767		3.00632	2.90852	2.56971	4.62894	4.43734	3.7803	2.73255	2.98136	2.74997	3.14058	3.16374	2.82017
ENSMUSG00000104316	0.267758	0.475069	0.651358	1.07526	1.21476	0.61745	1.02834	0.905134	0.892337	0.975925	0.662089	0.833706		0.547318	0.763795	0.847576	1.01311	0.965266	1.08208	0.682009	1.11139	0.634389	0.833413	0.925592	0.627928
ENSMUSG00000106081	0	0	0	0	0	0	0	0	0	0	0	0		0	0	0	0	0	0	0	0	0	0	0	0
ENSMUSG00000001138	4.24031	4.96104	4.72636	3.79683	3.79678	3.64176	5.3643	5.99214	5.70164	6.47016	5.73339	4.68217		5.03972	5.27889	5.2464	2.99152	3.83708	3.41047	4.49888	6.12382	5.5283	5.96577	5.0004	4.43452
ENSMUSG00000102845	0	0	0	0	0	0	0	0	0	0	0.221414	0.223045		0.418361	0	0	0	0	0	0.210531	0	0	0	0.239639	0
ENSMUSG00000067653	0.350747	0.520413	0.621699	0.542657	0.572021	0.418237	0.631765	0.538257	1.78583	0.468748	0.684603	0.689644		1.08491	1.39154	0.593688	0.514301	0.43589	0.362606	0.755946	0.752817	0.70656	0.953091	0.669248	0.502669
ENSMUSG00000109510	0	0	0	0	0	0	0	0	0	0	0	0		0	0	0	0	0	0	0	0	0	0	0	0
ENSMUSG00000079610	1.61478	1.89067	2.25463	1.90851	2.06627	2.45674	3.21732	3.1432	3.34818	3.19501	3.28901	2.68152		2.40602	2.34588	2.22399	2.67088	2.67525	2.54492	3.04217	4.13785	3.74905	3.85241	3.72594	2.84677
ENSMUSG00000026121	24.1772	25.1285	26.7436	14.6797	15.2942	18.2852	19.7851	22.7809	22.8356	29.4515	21.669	23.1479		24.1225	26.6922	30.4911	15.4018	16.2414	15.1884	16.9541	26.1749	23.2857	24.6107	23.228	17.8978
ENSMUSG00000087589	1.44847	1.65954	1.52898	1.4088	1.36285	1.43127	1.49606	2.01239	1.62181	2.16978	2.35716	1.9717		1.61054	1.74809	2.30356	1.22533	0.92522	1.24787	1.34078	1.54358	1.85172	2.15721	2.41451	1.8944
ENSMUSG00000046337	80.7744	77.3528	76.3842	17.6398	21.4081	29.2685	6.40954	10.1866	7.01631	34.7427	26.5688	27.0278		53.1297	57.9149	60.6626	11.4725	15.7796	15.7541	1.26048	1.02221	1.15739	4.1297	2.99076	4.11461
ENSMUSG00000089906	0	0	0	0	0	0	0	0	0	0	0	0		0	0	0	0	0	0	0.164153	0	0	0.186267	0	0
ENSMUSG00000077939	0	0	0	0	0	0	0	0	0	0	0	0		0	0	0	0	0	0	0	0	0	0	0	0
ENSMUSG00000061518	17.849	13.2321	14.0076	17.7764	16.0074	13.7307	13.5995	11.9267	11.2113	10.4317	10.2082	10.4724		14.7854	12.4332	11.3505	15.4971	18.1151	14.4128	12.8468	11.398	11.1445	10.4876	13.1607	11.4547
ENSMUSG00000037351	15.4562	15.8639	16.6541	17.4757	18.8661	19.206	23.6055	21.6986	19.2369	19.9448	18.9663	17.0564		16.0883	16.2314	15.9219	19.2226	20.9169	19.4364	19.2398	24.3137	20.7324	22.0572	21.0402	18.8299
ENSMUSG00000102416	0.0602679	0	0.0310136	0.0289376	0.0589733	0	0.0592115	0.0640296	0.064981	0	0.102455	0.0688063		0	0	0.065579	0.0305899	0.03064	0	0.0649461	0.105835	0.136582	0.0736951	0	0.0706681
ENSMUSG00000104237	0	0	0	0	0	0	0	0	0	0	0	0.0367416		0	0	0	0	0	0	0	0	0	0	0	0
ENSMUSG00000026117	0.158082	0.144339	0.0361549	0.151806	0.103124	0.102818	0.241596	0.485187	0.132568	0.301808	0.179159	0.461223		0.206873	0.133036	0.172013	0.392271	0.250035	0.308696	0.283922	0.12338	0.218933	0.171824	0.193906	0.102979
ENSMUSG00000097291	0	0	0	0	0	0	0	0	0	0	0	0		0	0	0	0	0	0	0	0	0	0	0	0
ENSMUSG00000026116	7.51484	7.26615	8.7053	11.318	12.4888	10.1967	12.2211	11.3471	9.52918	9.70194	10.124	9.37625		9.5287	8.69893	8.72384	12.6103	12.7956	11.7977	10.9319	10.726	10.6599	9.71476	9.49858	9.06041
ENSMUSG00000103016	0.735016	1.51001	3.40413	1.76458	2.15768	1.07564	1.0832	0.780893	1.18874	0.841967	3.33205	0		0.393493	2.78352	1.99947	1.11921	2.61576	1.89967	1.98017	0.430249	2.08216	1.34816	1.35237	3.44742
ENSMUSG00000102930	1.78591	1.67787	1.83804	2.53068	2.2164	2.33731	2.26815	2.05935	2.27781	2.07072	2.493	2.06379		2.54181	2.16801	2.48836	2.87416	2.54669	2.94956	2.30005	2.37128	2.14705	1.86421	2.1639	1.71103
ENSMUSG00000103159	1.86423	2.03651	1.8882	2.96949	2.64941	2.19408	2.34032	2.29497	2.31312	2.23719	2.28047	1.97632		2.24951	1.96908	2.4149	3.15407	2.46721	2.8756	2.21621	2.45964	2.43095	2.26148	2.34114	2.18594
ENSMUSG00000080054	0	0	0	0	0.103262	0	0	0	0	0	0.119599	0		0	0.114183	0	0	0	0	0	0.123546	0	0.258081	0	0
ENSMUSG00000095944	0	0	0	0	0	0	0	0	0	0	0	0		0	0	0	0	0	0	0	0	0	0	0	0
ENSMUSG00000050122	0.087817	0.0701596	0.0702961	0.0562203	0.0381914	0.104715	0.0671049	0.0310994	0.126246	0.0894179	0.110584	0.0556991		0.114921	0.0739032	0.0743212	0.0594306	0.109134	0.141223	0.126178	0.125656	0.0995076	0.119313	0.119686	0.114413
ENSMUSG00000103603	0	0	0	0	0	0	0	0	0	0	0	0		0	0	0	0	0	0	0	0	0	0	0	0
ENSMUSG00000026114	0	0	0	0.0127539	0	0	0	0	0.0143198	0.0152137	0	0		0.0142202	0.0287406	0	0	0	0	0	0.0155486	0	0	0	0
ENSMUSG00000102231	0	0	0	0	0	0	0	0	0	0	0	0		0	0	0	0	0	0	0	0	0	0	0	0
ENSMUSG00000026113	8.37863	9.17817	10.3104	11.2624	11.1791	10.5585	7.67005	8.33181	8.28103	11.0873	9.22049	9.38081		9.72406	9.00002	10.4878	8.75708	9.33216	8.97052	5.93755	5.83448	5.91657	7.33134	6.58469	5.69536
ENSMUSG00000086064	0	0	0	0	0	0	0	0	0	0	0	0		0	0	0	0	0	0	0	0	0	0	0	0
ENSMUSG00000102879	0	0	0	0	0	0	0	0	0	0	0	0		0	0	0	0	0	0	0	0	0	0	0	0
ENSMUSG00000026112	17.1252	17.4669	17.7184	18.5433	18.7178	15.9219	13.9071	13.7125	13.9379	13.0435	13.3383	14.2412		14.5417	14.1178	13.9785	17.0778	16.8191	15.0398	13.3771	12.3523	13.1078	11.9661	11.5218	10.8961
ENSMUSG00000026111	17.8063	17.9145	18.1891	19.912	21.2343	18.0215	18.5733	18.8117	17.5122	18.2241	19.9541	17.9351		17.8894	18.6543	18.5788	19.1569	19.459	18.8901	19.2602	17.2615	18.2911	19.942	19.3103	18.2643
ENSMUSG00000026110	1.79517	1.36204	1.45707	2.60544	2.8984	1.92256	2.58543	2.14129	1.82118	2.03769	1.79407	2.25445		1.75173	1.48769	1.37624	2.29034	2.88317	2.4295	2.69513	1.75774	1.83536	1.27716	1.35622	1.4639
ENSMUSG00000103948	0.40059	0.215539	0.314121	0.604506	0.634642	0.390822	0.674689	0.628257	0.41135	0.437028	0.324286	0.37023		0.388066	0.18576	0.207568	0.600296	0.73705	0.611342	0.86337	0.312653	0.540379	0.419861	0.280782	0.290778
ENSMUSG00000087233	0.117438	0.060316	0.0604333	0.225551	0.172373	0.114575	0.11538	0.0935763	0.0633111	0.100895	0.033274	0.033519		0.0314355	0.0953015	0.0319469	0.119215	0.0895578	0	0.063277	0.0343719	0.0665361	0.0359006	0.0360128	0.034426
ENSMUSG00000026090	0.0103554	0.031911	0	0.0198885	0.0911965	0.0404115	0.0305216	0.0330052	0.0446608	0.0948975	0.269929	0.0591124		0.055438	0.078432	0.0450718	0.0105121	0.0842343	0.0856442	0.0669552	0.0484931	0.0469358	0.0886374	0.0762124	0
ENSMUSG00000089767	0	0	0	0	0	0	0	0	0	0	0	0		0	0	0	0	0	0	0	0	0	0	0	0
ENSMUSG00000104365	0	0	0	0	0	0	0	0	0	0	0	0		0	0	0	0	0	0	0	0	0	0	0	0
ENSMUSG00000102650	0	0	0.0243858	0.0227534	0	0	0	0	0.0510941	0.0271419	0.161119	0		0	0	0	0	0	0.0244953	0.0510667	0.0277393	0	0.028973	0.0290636	0
ENSMUSG00000060771	2.99687	3.08343	3.37351	1.82234	1.88586	1.75524	2.11624	2.09992	2.07798	2.85702	2.68139	2.92061		2.84989	2.7093	3.37896	1.52611	1.92454	2.07396	2.44337	2.74101	2.58038	3.03771	2.63608	2.80313
ENSMUSG00000097268	0	0.0174758	0.0175098	0	0.0166477	0	0	0.0180751	0	0	0	0		0.0182161	0	0	0	0	0	0	0.0199177	0	0	0	0
ENSMUSG00000037216	1.07618	1.15809	0.817514	1.18109	1.3038	0.949947	0.855925	0.816682	0.994579	1.32083	0.696953	0.789846		1.15228	0.804015	0.864325	1.11848	1.01609	0.874162	0.93882	1.31991	1.07428	0.75197	0.974331	0.600903
ENSMUSG00000026088	3.32017	3.27405	3.16326	6.65	6.85044	5.49741	5.75972	3.99101	3.6821	3.39036	3.95636	4.11546		3.77839	3.75667	3.69534	6.2786	5.36291	7.00216	4.78416	4.77546	5.50352	4.52387	5.21289	5.47262
ENSMUSG00000026087	7.07014	5.95719	6.43822	8.35383	8.17758	6.83416	6.01792	5.38262	4.63705	4.77724	4.41257	4.98442		5.49439	5.62287	5.45969	7.9213	7.60297	7.05657	5.02078	5.18753	4.68867	5.21906	5.03555	6.1317
ENSMUSG00000061584	0.0204967	0	0	0	0	0	0	0	0	0	0	0		0	0	0	0	0	0	0	0	0	0	0	0
ENSMUSG00000087374	0	0.0135295	0	0	0	0.0128502	0.0129405	0	0.0142014	0	0	0		0.0141026	0	0	0	0	0	0.0141937	0	0	0.0161058	0	0
ENSMUSG00000026085	0	0	0	0	0	0	0.0581446	0	0	0	0	0		0	0	0	0	0	0	0	0.138571	0	0	0	0
ENSMUSG00000089141	0	0	0	0	0	0	0	0	0	0	0	0		0	0	0	0	0	0	0	0	0	0	0	0
ENSMUSG00000058407	4.56712	4.56677	4.42115	5.02897	5.22609	5.07539	4.96357	4.80924	3.88464	4.42477	4.74416	4.5352		4.25329	4.30441	4.58635	4.75345	5.23677	5.47364	4.80341	5.09672	4.85453	4.87861	5.12049	4.92872
ENSMUSG00000026083	4.0629	5.03131	4.92463	7.12014	7.04961	6.6975	6.15163	5.9595	5.60069	5.90093	5.75879	6.1211		4.99058	4.69925	4.6027	7.58688	6.71171	6.55665	6.36417	6.93922	6.76522	7.21491	6.58972	6.98175
ENSMUSG00000026082	6.50956	7.01042	6.47159	6.19384	6.40307	6.86621	7.59251	7.60383	6.87163	6.73451	7.02018	6.94542		7.5172	7.12634	7.83418	6.79835	7.5372	7.75144	7.62084	8.09968	7.95542	9.07463	9.1866	8.74186
ENSMUSG00000103804	2.47399	2.69529	2.46906	2.15979	2.42085	2.55995	3.97739	3.02666	3.31412	2.49047	2.54895	3.33804		3.05027	2.19017	3.34462	3.50078	3.50651	3.48769	3.15076	3.24743	3.73779	4.03357	3.7703	2.54929
ENSMUSG00000102716	0	0	0.0292683	0	0	0	0	0	0	0	0	0		0	0	0	0	0	0	0	0.0332931	0	0	0	0
ENSMUSG00000037138	6.28685	8.55904	7.18569	5.15744	6.48412	6.14125	8.78388	7.14915	7.09357	7.86209	8.56618	6.54634		9.78417	9.74212	9.28159	6.01317	8.42418	7.46289	6.03438	7.59131	7.18643	9.38725	8.4575	7.57549
ENSMUSG00000085391	0	0	0.0593068	0	0	0	0	0	0	0	0	0		0	0	0	0	0	0	0	0	0	0.0704629	0	0
ENSMUSG00000085280	0	0.0844802	0	0	0	0	0	0	0.0886751	0	0	0		0	0	0	0.083488	0	0	0	0	0	0.100567	0	0
ENSMUSG00000087131	0.453782	0.699184	0.875679	0.0544707	0.111009	0	0.613013	0.482106	0.397531	0.194929	0.35357	0.226656		0.637701	0.675117	0.370328	0.143953	0.201863	0.146601	0.305628	0.597659	0.385644	0.381481	0.0347884	0.565345
ENSMUSG00000102984	0	0.102047	0	0	0	0	0	0	0	0	0	0		0	0	0	0	0	0	0	0	0	0	0	0
ENSMUSG00000102541	0	0	0	0	0	0	0	0	0	0	0	0		0	0	0	0	0	0	0	0	0	0	0	0
ENSMUSG00000103531	0	0	0	0	0	0	0.102649	0	0	0	0	0		0	0	0	0	0	0	0	0	0	0	0	0
ENSMUSG00000048814	3.65481	3.10693	3.4012	1.09594	1.52781	2.16537	6.14967	6.47899	4.9069	4.8523	3.38033	3.96477		3.19355	3.65149	2.91791	2.11803	2.04319	2.46101	3.65179	4.63943	4.72844	6.50669	6.14915	5.67296
ENSMUSG00000026080	0.263559	0.130851	0.167273	0.156075	0.154738	0.167136	0.215782	0.140005	0.18471	0.150954	0.124458	0.165494		0.258678	0.285172	0.282005	0.129314	0.205455	0.204352	0.27455	0.17999	0.248871	0.193366	0.301732	0.221479
ENSMUSG00000103647	0	0	0	0	0	0	0	0	0	0	0	0		0	0	0	0	0	0	0	0	0	0	0	0
ENSMUSG00000102447	0	0	0	0.130744	0	0.199244	0.0668814	0.0723236	0.0733982	0	0.0771509	0		0	0	0	0.138209	0.138436	0	0.0733588	0	0	0.0832411	0.0835013	0
ENSMUSG00000067604	0	0	0	0	0	0	0	0	0	0	0	0		0	0	0	0	0	0	0	0	0	0	0	0
ENSMUSG00000026078	5.31889	5.88578	5.38442	6.5551	6.37476	6.47737	5.01761	5.33326	4.56638	5.73611	5.661	5.03429		5.88169	6.48287	5.27256	7.09379	6.99141	7.17281	6.13445	6.06653	6.04108	6.24496	6.6159	6.29517
ENSMUSG00000103046	1.60322	2.20674	2.11203	1.75511	1.66291	1.72054	2.52019	2.589	2.14346	2.53438	2.65278	2.92857		1.57925	1.76939	2.05852	1.59493	2.54303	1.95577	2.14231	2.66524	2.39798	1.9212	2.12386	2.55664
ENSMUSG00000104188	0.0285153	0.0878722	0	0.0273831	0	0.16692	0.0280154	0.12118	0.122981	0.065329	0.22622	0.0325551		0	0.0617073	0.124113	0.115787	0.0289941	0.0294794	0.122915	0.0667669	0.096934	0.139473	0.0699544	0.200616
ENSMUSG00000103182	0	0	0.0259165	0.0483633	0	0	0	0	0	0	0	0		0	0	0	0	0	0.0260328	0	0	0	0.0307916	0	0.0295269
ENSMUSG00000098833	0	0	0	0	0	0	0	0	0	0	0	0		0	0	0	0	0	0	0	0	0	0	0	0
ENSMUSG00000026077	1.53569	1.16056	1.35473	1.6854	1.51344	1.26281	2.43559	2.01613	2.29445	3.16647	3.00848	2.91793		1.91441	1.75658	1.46812	1.71482	1.71763	2.09792	4.08996	4.39194	5.15825	3.91662	3.86159	2.94543
ENSMUSG00000092553	0.185702	0.190752	0.764492	0	0.181713	0	0.182447	0.197293	0	0.425446	0	0		0.596497	0.20093	0	0.188512	0.18882	0	0	0	0	0	0	0
ENSMUSG00000092563	0.284074	0.0972664	0.194911	0	0.185314	0.0923822	0.558188	0.301805	0.714673	0.433878	0.858529	0.432426		0.202773	0.102456	0.309107	0.384496	0.192563	0.68525	0.816331	0.997714	0.429188	1.04209	1.50994	0.333095
ENSMUSG00000073702	6.83007	7.24318	6.5413	8.56301	9.59185	8.48365	8.23261	7.89468	6.40958	7.57036	7.38234	7.1479		5.78946	6.67168	5.81483	9.66186	9.99918	10.0685	8.89362	9.03265	9.24419	9.58905	10.1232	9.93674
ENSMUSG00000003134	2.95921	3.10151	3.47921	4.20961	4.44653	3.59169	4.3758	4.40148	4.2073	6.0327	5.27506	5.90943		3.11475	2.99566	2.71789	4.16486	3.94728	4.23112	5.92381	5.22598	4.46709	5.38482	4.97099	4.39909
ENSMUSG00000102607	0.653209	0.914963	0.733394	0.741325	0.813498	0.405542	1.05015	0.567802	1.02442	1.36047	0.8076	1.15252		0.572232	0.835279	0.258463	0.964499	1.2076	0.613904	1.21585	1.25137	0.807455	1.08919	0.509877	1.04445
ENSMUSG00000104827	0	0	0	0	0	0	0	0	0	0	0	0		0	0	0	0	0	0	0	0	0	0	0	0
ENSMUSG00000065629	0	0	0	0	0	0	0	0	0	0	0	0		0	0	0	0	0	0	0	0	0	0	0	0
ENSMUSG00000003135	4.04489	3.98562	3.88544	5.97031	5.99564	6.19709	7.24149	7.56017	6.76795	5.73176	5.55196	5.43891		4.79606	4.49006	4.67847	6.35685	6.50434	6.76808	7.11948	9.55858	8.04635	7.78546	8.14056	7.9224
ENSMUSG00000085894	1.46301	1.5028	1.03334	7.05217	6.28774	3.63831	4.6503	4.2363	3.71158	4.20616	4.12892	4.02832		1.90432	2.14168	2.09137	8.3576	6.50451	6.76166	3.95689	6.71678	5.68844	4.63024	4.64471	4.27187
ENSMUSG00000077704	2.86656	2.94452	4.42536	8.25826	7.94745	7.45776	10.7959	8.12129	2.57561	9.30373	5.95605	10.9089		5.62695	4.65245	3.63904	7.75983	11.173	9.38436	8.23752	10.0678	7.57906	11.684	7.61835	7.84288
ENSMUSG00000048234	5.4998	5.23089	5.35542	16.1111	16.3805	11.5986	17.5565	15.5619	12.0395	11.7941	11.3748	13.1076		5.15507	5.71037	6.20611	21.6178	18.2639	16.5978	14.7469	18.1672	15.5484	11.4576	10.494	10.1836
ENSMUSG00000064936	3.63833	2.90677	4.1606	12.0345	13.4495	6.70482	11.1208	13.3142	6.97396	8.79855	11.4539	7.3845		3.89558	3.06187	1.75953	18.0565	16.8529	18.8067	10.0197	12.7784	14.2003	11.3695	9.42151	7.58432
ENSMUSG00000102471	0.17845	0.274955	0.0918299	0.257048	0.0873085	0.348198	0.0876612	0.0947943	0	0.102208	0.101121	0.101866		0.191068	0	0.0970881	0	0.0907235	0.276726	0	0.208916	0	0.109104	0.21889	0
ENSMUSG00000050967	0.0517685	0.0354509	0.0621597	0.0994263	0.0759846	0.0673415	0.771392	0.632496	0.306993	0.553478	0.576928	0.709232		0.0554289	0.0280068	0	0.148897	0.122822	0.044599	0.288232	0.333336	0.332407	0.200456	0.169333	0.343978
ENSMUSG00000097083	0	0.0147373	0	0	0.014039	0.0139973	0.0563827	0.0304853	0.0154691	0.0328696	0.0975601	0.114658		0.0153616	0	0	0	0.0291762	0.0148322	0.0154608	0	0	0.0350872	0.0703936	0.016823
ENSMUSG00000057173	0.098277	0.0252374	0.050573	0.0471876	0.0480829	0.0239701	0	0.0261028	0	0.0844329	0.027845	0.0280501		0	0.0531681	0.0802032	0.024941	0	0.1016	0	0.115055	0.08352	0.0600861	0	0.0288091
ENSMUSG00000091937	0.2986	0	0.153659	0	0.146093	0	0.293366	0	0.482927	0	0	0		0.159857	0.323087	0	0	0	0	0.160889	0.349578	0	0.182563	0	0
ENSMUSG00000101634	0	0	0	0.0472539	0	0.0960152	0.48345	0.627347	0.477501	0.169103	0.111536	0.168537		0.0526868	0.266214	0.160632	0.149856	0.100068	0.152614	0.583298	0.518475	0.836373	0.902558	0.784662	1.15398
ENSMUSG00000026074	42.0473	44.8533	43.9919	43.6865	48.0479	48.9009	81.8174	79.2714	63.6554	61.6587	54.1137	55.27		50.5127	54.4234	54.8746	57.3922	63.4607	61.9478	58.72	82.516	74.2772	92.5391	92.2563	79.7253
ENSMUSG00000102985	0	0	0	0.0379452	0	0	0	0	0	0	0	0		0.0846158	0	0	0.0401119	0.0401776	0	0	0	0	0	0	0
ENSMUSG00000026073	0.385614	0.19805	0.425218	15.7644	17.0338	3.7621	0.27061	0.146315	0.148489	0.18931	0.124865	0.251568		0.353896	0.417235	0.479538	10.9885	16.1037	5.8374	0.267137	0.0967385	0.187263	0.101041	0.202714	0.226079
ENSMUSG00000097899	0.312076	0.0641126	0.0642373	0.659309	0.366447	0.121786	0.122642	0.066311	0.134592	0.0714972	0	0.285031		0.467799	0.202601	0	0.190079	0.19039	0.387153	0.06726	0	0	0	0.153119	0.073186
ENSMUSG00000102975	0.0342257	0.0527348	0.0880622	7.72372	6.6981	1.40243	0.0336258	0.036362	0.0184511	0.0392059	0.0193945	0.117224		0	0.185162	0.167588	5.62847	6.62949	2.4945	0.0553236	0.0200344	0	0.0209255	0.0209909	0.020066
ENSMUSG00000026072	5.02988	4.75096	4.35218	18.9004	23.0494	16.6395	6.76748	6.29151	6.43842	7.82428	6.48678	7.41148		5.41206	5.12064	4.09812	24.3226	22.095	23.0454	9.70139	7.98683	9.88285	7.99868	8.89494	7.02128
ENSMUSG00000103560	0.494718	0.49151	0.542547	1.73675	2.83312	1.90688	0.94022	1.12874	0.830713	1.35637	1.12135	1.4259		0.512331	0.526511	0.51184	3.359	2.53162	2.32246	1.17111	0.816544	0.799511	0.69419	0.875423	0.893908
ENSMUSG00000070942	2.13702	2.10004	2.05648	5.51938	4.89184	3.28918	3.82771	3.45888	4.94931	3.59684	4.57283	3.03871		3.20502	2.38739	2.552	4.69896	4.31443	4.67376	4.86352	3.71213	3.96882	3.99987	4.05023	4.18838
ENSMUSG00000103230	2.37834	0.945685	2.36881	2.87331	1.80174	2.32034	2.26127	1.87471	3.14337	2.98806	2.78239	2.27734		1.8072	1.82626	1.33571	2.88162	1.7162	2.06218	2.23225	1.07782	2.95576	1.78245	1.4116	2.87872
ENSMUSG00000026069	1.96676	1.50344	1.82019	6.70552	11.6515	2.61046	0.928695	0.923275	1.05206	2.43632	2.22898	2.60222		1.73853	1.78162	1.57603	3.79184	6.6117	4.14532	2.44802	1.28513	1.22658	1.15586	1.06597	2.09163
ENSMUSG00000026070	0.272751	0.190514	0.179656	0.555274	0.651216	0.287388	0.643128	0.336139	0.447002	0.924818	0.618232	1.03382		0.210266	0.236094	0.261172	0.93031	0.554662	0.676735	0.505546	0.29377	0.284336	0.373539	0.361325	0.473331
ENSMUSG00000026068	0.443655	0.375769	0.12817	5.97204	5.01909	1.87562	0.726463	0.661538	0.52031	0.766773	0.564554	0.995245		0.13334	0.244229	0.618261	4.59849	3.60884	2.61514	0.931022	0.656079	0.520355	0.485392	0.525098	0.556721
ENSMUSG00000104441	0	0	0	0	0	0	0	0	0	0	0	0		0	0	0	0	0	0	0	0	0	0	0	0
ENSMUSG00000026065	0.080639	0.0473326	0.118562	0.0995625	0.191631	0.0899116	0.135815	0.146867	0.16147	0.422275	0.326394	0.34195		0.19735	0.0623227	0.0752103	0.175413	0.0702799	0.0357281	0.223453	0.0809193	0.0652672	0.0845184	0.0565217	0.0945546
ENSMUSG00000102676	0	0	0.0137035	0	0	0	0	0	0.0717803	0.0152522	0	0		0	0	0	0	0	0	0	0	0	0	0	0
ENSMUSG00000026062	0.0902983	0.092754	0.0697008	0.122844	0.0220896	0.080755	0.0369648	0.0479672	0.438119	0.0258594	0.0341125	0.0171819		0.233651	0.219832	0.0982558	0.0534711	0.0382561	0.054455	0.0648717	0.0264286	0.0341064	0.0368053	0.00923009	0.0617638
ENSMUSG00000103679	0	0	0	0	0	0	0	0	0	0	0	0		0	0	0	0	0	0	0	0	0	0	0	0
ENSMUSG00000103270	0	0	0	0	0	0	0	0.0171217	0.0173761	0	0	0		0.0172553	0.0348747	0.017536	0	0	0	0.0173667	0	0	0	0	0
ENSMUSG00000041945	0.79984	0.758393	0.854851	0.649918	0.772625	0.44019	1.13843	1.05676	1.26042	1.11591	1.16216	1.19413		0.878354	0.665716	0.714114	0.603753	0.646447	0.583059	1.35919	1.47662	1.40596	0.777415	0.893048	1.02203
ENSMUSG00000079588	3.13464	3.16026	6.3129	1.70949	1.34431	0.925012	1.14063	0.760623	5.71641	0.886607	1.22805	2.27537		5.05514	4.45945	2.52658	1.25712	0.885356	0.920178	1.8975	1.06469	0.898947	1.0174	1.18673	0.703351
ENSMUSG00000094136	0	0	0	0	0	0	0	0	0	0	0	0		0	0	0	0	0	0	0	0	0	0	0	0
ENSMUSG00000104072	0	0.0988696	0	0	0	0	0	0	0	0	0	0		0	0	0	0	0	0	0	0	0	0	0	0
ENSMUSG00000100185	0	0	0	0	0	0	0	0	0.0216852	0	0	0		0	0	0	0	0	0	0	0	0	0	0	0
ENSMUSG00000100832	0	0	0	0	0	0	0	0.017459	0	0.0188245	0	0		0	0	0	0	0	0	0	0	0	0	0	0
ENSMUSG00000100178	0	0	0	0	0	0	0	0	0	0	0	0		0	0	0	0	0	0	0	0	0	0	0	0
ENSMUSG00000101877	0	0	0	0	0	0	0	0	0	0	0	0		0	0	0	0	0	0	0	0	0	0	0	0
ENSMUSG00000053640	0	0	0	0	0	0	0	0	0	0	0	0		0	0	0	0	0	0	0	0	0	0	0	0
ENSMUSG00000101919	0	0	0	0	0	0	0	0	0	0	0	0		0	0	0	0	0	0	0	0	0	0	0	0
ENSMUSG00000101299	0	0	0	0	0	0	0	0	0	0	0	0		0	0	0	0	0	0	0	0	0	0	0	0
ENSMUSG00000100180	0	0	0.0851106	0.0397066	0	0	0	0	0	0	0	0.0472062		0	0	0	0.0419739	0	0	0	0	0	0	0	0
ENSMUSG00000103106	0	0	0	0	0	0	0	0	0	0	0	0		0	0	0	0	0	0	0	0	0	0	0	0
ENSMUSG00000060424	0.0471544	0.0121092	0.0121327	0.0113206	0	0.0230023	0.011582	0	0	0	0	0		0	0.0127553	0.0128275	0	0	0	0	0	0	0	0	0
ENSMUSG00000104199	0	0	0	0	0	0	0	0	0	0	0	0		0	0	0	0	0	0	0	0	0	0	0	0
ENSMUSG00000093436	0	0	0	0	0	0	0	0	0	0	0	0		0	0	0	0	0	0	0	0	0	0	0	0
ENSMUSG00000045515	0	0.00728611	0	0	0.00694084	0	0	0	0	0	0.00803893	0		0	0	0	0	0	0	0	0	0	0	0.00870063	0
ENSMUSG00000097063	0	0	0	0	0	0	0	0	0	0	0	0		0	0	0	0	0	0	0	0	0	0	0	0
ENSMUSG00000099784	0	0	0	0	0	0	0	0	0	0	0	0		0	0	0	0	0	0	0	0	0	0	0	0
ENSMUSG00000060679	4.11273	3.9342	3.73537	4.15962	4.23854	3.62099	4.55132	4.24349	3.96241	4.42913	4.41303	4.58088		4.21802	3.94678	3.89965	4.0824	4.6825	4.08209	4.27474	4.48391	4.70157	4.7391	4.58612	4.11673
ENSMUSG00000077448	0	0	0	0	0	0	0	0	0	0	0	0		0	0	0	0	0	0	0	0	0	0	0	0
ENSMUSG00000041907	0.0290432	0.0223748	0.0224183	0.0209176	0.00710482	0.0141675	0.0285341	0.023142	0	0	0	0.0248684		0.0388709	0.00785621	0.00790065	0.00737066	0	0.00750629	0	0.00850037	0.0164548	0	0.0178124	0.0170275
ENSMUSG00000089088	0	0	0	0	0	0	0	0	0	0	0	0		0	0	0	0	0	0	0	0	0	0	0	0
ENSMUSG00000070939	5.57053	4.98401	5.59019	6.68786	6.61322	6.42537	7.37405	7.12426	6.53292	6.31525	6.1341	5.966		5.75414	5.65937	5.56109	6.51058	7.02287	5.92724	6.01841	6.66734	6.4695	6.79988	6.5685	5.81292
ENSMUSG00000100269	0	0	0	0	0	0	0	0	0	0	0	0		0	0	0	0	0	0	0	0	0	0	0	0
ENSMUSG00000041878	0.547433	0.778598	0.476735	0.283069	0.412057	0.164334	0.786071	0.492125	0.68105	0.578852	0.572697	0.576914		0.270527	0.455635	0.504033	0.555717	0.642261	0.261204	0.45379	0.394395	0.477162	0.25746	0.619836	0.493771
ENSMUSG00000010290	17.143	17.3907	17.5183	11.1501	10.8411	11.5651	10.3474	10.6727	8.47165	10.9677	11.3678	11.1913		13.8314	15.4902	14.2218	11.7713	12.2696	12.0193	9.40061	10.4085	10.4014	11.3918	10.9427	11.6367
ENSMUSG00000008136	6.73196	10.1307	8.72476	11.4662	14.5301	12.0815	11.0777	7.38761	10.4844	10.5994	18.3988	9.14061		9.72926	9.56214	7.50608	9.11177	10.7041	9.42264	15.7629	13.3949	14.6599	11.9581	10.9081	9.71279
ENSMUSG00000094497	0	0	0	0.104487	0	0	0.106899	0	0	0	0	0		0	0	0	0	0	0	0	0	0	0	0	0
ENSMUSG00000099576	0	0	0	0	0	0	0	0	0	0.0506739	0	0.0505043		0	0	0	0	0	0	0	0.0517893	0	0	0	0
ENSMUSG00000099694	0.116012	0	0	0	0	0	0	0	0	0	0	0.132448		0.124215	0	0	0	0	0	0	0	0	0	0	0
ENSMUSG00000101923	0	0	0	0	0	0	0	0	0	0	0	0		0	0	0	0	0	0	0	0	0	0	0	0
ENSMUSG00000066877	3.20866	3.27169	2.95024	2.99064	3.00122	3.42965	6.13099	5.60218	4.96043	4.54038	4.89318	4.65986		3.43554	3.77812	3.19619	3.73622	3.63438	3.9757	5.47897	7.58195	6.08196	6.07281	5.74451	4.91044
ENSMUSG00000103422	0.801701	0.888517	0.586259	0.506495	0.536749	0.679237	1.78257	1.43451	1.45582	1.11169	1.09987	1.10797		0.609907	0.867444	1.14783	1.22075	0.879519	1.15597	1.70513	2.54402	2.19935	1.65105	1.81148	1.3606
ENSMUSG00000103945	2.84513	2.29625	2.30072	1.67833	2.58515	2.53783	4.87174	4.49089	4.29467	4.28342	4.14574	4.17627		3.08982	2.81458	2.52091	2.64062	2.81025	3.23546	5.03696	6.13829	5.57272	4.473	5.98264	4.19396
ENSMUSG00000026051	2.3888	2.9924	2.93825	1.23091	1.53932	2.21687	4.69386	3.5283	3.64354	3.80425	4.02792	3.32589		2.37056	2.1434	1.39475	2.60238	3.79148	1.74677	6.15303	3.68336	4.88546	3.91842	3.57334	4.91888
ENSMUSG00000100764	0.114746	0.117866	0.708574	0.661141	0.561405	0.671687	1.01461	0.60954	0.618596	0.920097	0.910313	0.786014		0.245718	0.620778	0.749147	0.931858	1.16673	0.711753	0.370958	0.806013	1.04017	0.701552	0.562995	0.269094
ENSMUSG00000100635	0	0	0.0883787	0	0	0	0.0843667	0.0912318	0.0925873	0.196734	0.194642	0.294113		0.0919437	0.0929138	0.0934394	0	0.087314	0	0	0	0	0	0	0.201381
ENSMUSG00000100480	1.05318	1.08182	1.19232	1.51705	2.06111	2.46599	1.65555	1.3427	1.81686	0.96514	0.954877	1.32262		0.676587	1.02559	0.572995	1.49676	1.6063	1.5243	1.13493	1.23298	2.02875	2.06051	1.42103	1.35841
ENSMUSG00000057363	1.89717	2.0229	2.36641	3.7328	3.48078	3.80241	2.97821	3.33009	3.01271	2.78739	2.53573	3.07235		2.50602	2.09737	1.98582	3.93549	4.13063	3.41098	3.83331	3.71786	3.91391	3.73192	3.74358	4.29194
ENSMUSG00000090243	0	0	0	0	0	0	0	0	0	0	0	0		0.0439949	0	0	0	0	0	0	0	0	0.050244	0	0
ENSMUSG00000100701	0.192857	0.0990511	0	0.1852	0.0943572	0.0940773	0.189477	0.102447	0	0	0.218571	0		0	0.104336	0.104926	0.195776	0	0.099689	0.103914	0	0	0	0.354842	0
ENSMUSG00000101395	0	0	0	0	0	0	0	0	0	0	0	0		0	0	0	0	0	0	0	0	0	0	0	0
ENSMUSG00000088848	0	0	0	0	0	0	0	0	0	0	0	0		0	0	0	0	0	0	0	0	0	0	0	0
ENSMUSG00000095757	0	0	0	0	0	0	0	0	0	0	0	0		0	0	0	0	0	0	0	0	0	0	0	0
ENSMUSG00000041763	6.16376	6.15462	6.34906	11.6328	11.6137	10.2972	10.5283	9.88921	8.29316	7.6102	8.25029	8.91234		6.77267	6.63536	6.39486	12.5882	12.2005	11.3966	10.7276	9.44436	10.2815	9.36067	10.1255	10.8534
ENSMUSG00000047343	0.0122218	0.0502166	0.0754713	0.0117365	0	0.0357712	0.0120075	0.0259692	0.988315	0.0420004	0.0277025	0.0418598		0.157031	0.647976	0.0132988	0.0124067	0	0.02527	0.0790227	0.0572332	0	0	0.0449742	0
ENSMUSG00000090106	0	0	0	0	0	0	0	0	0	0	0	0		0	0	0	0	0	0	0	0	0	0	0	0
ENSMUSG00000091844	0.0175618	0.0270591	0.0180745	0.0674581	0.0601458	0.0599674	0.0690158	0.0746317	0.0189351	0.0201172	0.0298549	0.0100249		0.00940176	0	0.0286641	0.0445688	0.0714268	0.0363111	0.018925	0.0308399	0.0397994	0.053686	0.0969368	0.0720732
ENSMUSG00000026049	0.873165	1.14917	1.12332	2.77753	3.01713	2.44914	1.12594	1.24655	1.14739	1.1565	1.5153	1.68222		0.876472	0.679052	0.950112	2.38214	2.88544	2.76448	1.67605	2.17225	1.66962	1.66828	1.50614	2.84757
ENSMUSG00000101104	0	0	0	0	0	0	0	0	0	0	0	0		0	0	0	0	0	0	0	0	0	0	0	0
ENSMUSG00000026047	3.99204	3.9656	3.88878	5.83708	5.89961	4.79224	5.48766	5.82948	5.27843	6.53005	5.92067	5.55165		4.50297	3.57284	4.18295	5.25317	5.36199	5.60459	7.54162	6.9815	6.44083	7.69378	7.21405	8.10976
ENSMUSG00000041684	3.57355	3.79908	3.63929	3.50366	3.6435	3.43765	4.95946	4.61963	3.97425	4.12215	4.38986	4.69322		3.66568	3.92067	3.31743	3.38662	3.78601	3.92688	5.64175	5.66106	5.62084	5.85173	5.53284	5.94835
ENSMUSG00000026048	6.58713	7.17132	7.29595	5.46498	5.94576	6.2866	7.39619	7.6743	7.82697	7.50455	7.68883	7.22363		7.0145	7.1273	7.28464	5.67696	6.44259	6.20761	7.40748	8.97075	6.98674	9.47932	8.81639	8.01808
ENSMUSG00000046828	0	0	0	0	0	0	0.0130352	0	0.157359	0	0	0		0.0284118	0.0143558	0	0	0	0	0.0142976	0.0155329	0	0.0486711	0	0
ENSMUSG00000089703	0.164745	0.225634	0	0.105469	0.214941	0.107152	0.0539524	0	0.118419	0.0629056	0.37342	0		0	0.415928	0.239017	0.111492	0.0558371	0.113543	0.177533	0	0.248902	0.134299	0.0673594	0
ENSMUSG00000100966	0	0	0.0546894	0	0	0	0	0	0	0	0	0		0	0.0574957	0.0578209	0	0	0	0	0	0	0	0	0
ENSMUSG00000100769	0	0	0	0	0	0	0	0	0	0	0	0		0	0	0	0	0	0	0.0511128	0	0	0.0579983	0	0
ENSMUSG00000101567	0.850382	1.92172	1.40033	2.77651	3.6613	0.829646	2.67352	0.90346	2.20052	1.16894	1.54202	2.7184		1.63892	1.28816	0.555193	4.1436	3.97745	2.6374	2.38262	1.39379	1.34902	1.03984	1.87756	1.19656
ENSMUSG00000056870	47.0158	49.0988	47.0354	20.6408	20.0061	30.2748	37	38.7925	30.4728	33.0158	37.3719	37.9983		42.7786	46.2562	49.1504	18.7814	22.2248	25.4304	21.2336	21.0379	23.7375	24.9832	24.8898	32.5003
ENSMUSG00000102319	17.1148	18.4793	18.3493	5.93926	6.7845	6.75313	14.7667	16.0417	14.9637	16.6234	15.8723	14.8847		18.4236	20.9483	22.295	4.1856	5.24642	6.03672	8.17907	10.8813	9.67048	12.7454	12.8276	12.7756
ENSMUSG00000089877	8.88406	14.0098	10.4312	3.84511	2.69367	3.29606	11.31	9.97033	13.0865	13.1868	8.22502	10.1427		9.91415	11.7788	15.9301	2.4134	2.79904	3.62203	6.3375	7.91044	6.52212	8.10927	7.3672	7.1893
ENSMUSG00000101701	0	0	0	0	0	0	0	0	0	0	0	0		0	0	0	0	0	0	0.0625779	0	0	0	0	0
ENSMUSG00000103071	0.880976	1.3226	0.802076	0.260307	0.39787	0.363632	1.36488	1.07996	0.84027	1.28086	0.960033	0.734998		0.906988	1.28318	1.10609	0.206379	0.482338	0.140117	0.47468	0.555357	0.383944	0.745789	0.37406	0.43704
ENSMUSG00000100434	0	0	0	0.191163	0	0	0.195577	0	0.107317	0.114016	0	0.113635		0	0	0.108305	0	0	0	0	0	0.112784	0	0.122089	0.233419
ENSMUSG00000100013	0	0	0	0	0	0	0	0	0	0	0	0		0	0	0	0	0.0801142	0	0	0	0	0	0	0.0923877
ENSMUSG00000101251	0	0	0	0	0	0	0	0	0	0	0	0		0	0	0	0	0	0	0	0.0825848	0.0799326	0	0	0
ENSMUSG00000101937	0	0	0.0575402	0	0.0547071	0	0	0	0	0	0	0		0	0	0.060835	0	0	0.0577984	0	0	0.0633508	0.068364	0	0
ENSMUSG00000026043	334.21	319.211	306.057	643.461	596.251	606.286	514.047	515.434	947.513	611.12	886.277	481.955		395.555	362.787	302.51	518.021	529.473	554.375	1665.31	760.954	723.758	447.55	689.234	527.49
ENSMUSG00000105211	0	0	0	0	0	0	0	0	0	0	0	0		0	0	0	0	0	0	0	0	0	0	0	0
ENSMUSG00000026042	47.2166	43.981	41.0889	80.439	79.4774	74.0989	158.606	146.992	152.55	142.634	135.491	123.232		64.6768	68.8276	57.167	77.4618	89.1995	88.9987	240.762	200.544	178.289	162.642	158.378	144.441
ENSMUSG00000104476	3.2623	3.26874	3.60485	6.00682	5.7289	4.90911	7.28306	8.4714	8.01626	7.84101	7.55131	8.05585		4.67028	5.19231	4.23122	4.94532	5.87153	6.04509	12.5084	13.768	12.41	11.8071	11.442	11.3136
ENSMUSG00000100218	0	0.206041	0	0.0963113	0.196277	0.0978475	0.0985352	0.106553	0.108136	0	0	0		0	0.108518	0	0.203622	0.101977	0.103684	0.108078	0.117415	0.113645	0.122638	0.123021	0
ENSMUSG00000100361	0	0	0	0.102889	0.157262	0.0522652	0.0526325	0.11383	0	0	0.060714	0.183483		0	0	0.174877	0.108764	0.163413	0	0.0577298	0	0.0607031	0.0655068	0.131423	0.0628161
ENSMUSG00000100894	0	0	0	0	0.176112	0	0	0.191212	0	0	0	0.308214		0.0963519	0.0973686	0.0979193	0.182702	0.0915003	0.279095	0	0.105352	0.101969	0.110038	0	0
ENSMUSG00000095121	0	1.51354	0.505493	0.471655	0	0	0	0	0	0	0.55664	0		0	0.531432	0	0	0	0	0	0	0	0	0	0
ENSMUSG00000065255	0	0.412083	0	0	0	0	0	0	0	0	0	0		0	0.434071	0	0	0	0	0	0	0	0	0	0
ENSMUSG00000100843	0.0456988	0	0	0.746036	0.670757	0.40126	0.134693	0.0485512	0.147818	0.104697	0.103583	0.0521731		0.04893	0	0	2.13395	1.06872	0.614171	0.196984	0.0535006	0.258912	0	0.168164	0.0535849
ENSMUSG00000087764	0	0	0	0	0	0	0	0	0	0	0	0		0	0	0	0	0	0	0	0	0	0	0	0
ENSMUSG00000025995	5.25536	4.99066	4.95621	10.6702	11.3974	10.4532	6.40664	6.54054	5.07658	5.18463	5.2632	5.04482		5.46618	4.50264	4.93657	12.0743	11.4724	10.8661	6.53013	7.06917	7.17028	7.37047	6.64363	8.04867
ENSMUSG00000099850	0	0	0	0	0	0	0	0	0	0	0	0		0	0	0	0	0	0	0	0	0	0	0	0
ENSMUSG00000084817	0.12424	0.127619	0.127867	0	0.486286	0	0	0.395985	0.133956	0.142318	0	0		0.133025	0	0	0.12612	0	0	0	0	0	0	0	0
ENSMUSG00000098549	0	0	0	0.0673793	0.0686578	0	0	0	0	0.0803747	0	0		0	0	0	0	0.0713433	0	0	0	0	0	0	0
ENSMUSG00000099381	0	0.0459038	0	0.429142	0.262371	0.174395	0	0	0.0481832	0.051191	0.0506467	0		0	0	0	0	0.181756	0.0461994	0	0	0.0506376	0	0	0
ENSMUSG00000025993	0.350357	0.311901	0.48679	2.87663	2.83407	1.1052	0.751539	0.849915	1.29067	0.869565	0.893407	0.986651		0.312608	0.612859	0.629034	2.54296	2.274	1.15301	1.80596	1.08695	0.972647	0.578359	0.830856	0.94488
ENSMUSG00000099946	0	0	0	0	0	0	0	0.0348744	0	0	0	0		0	0.0355173	0	0	0	0	0.0353735	0	0.0371954	0	0	0
ENSMUSG00000070896	0	0.232184	0.232636	0	0	0.110263	0	0	0	0.129464	0.256174	0		0	0.122287	0	0	0.114916	0.467359	0	0	0	0.276396	0.13863	0.132522
ENSMUSG00000090682	0	0	0	0	0	0	0	0	0	0	0	0		0	0	0	0	0	0	0	0	0	0	0	0
ENSMUSG00000044457	0	0	0	0	0	0	0	0	0	0	0	0		0	0	0	0	0	0	0	0	0	0	0	0.0132039
ENSMUSG00000099432	0	0	0	0	0	0	0	0	0	0	0.106358	0		0	0	0	0	0	0	0	0	0	0.114754	0	0
ENSMUSG00000041144	0.365613	0.418786	0.457499	0.229855	0.203331	0.20786	0.708072	0.751717	0.717509	0.656844	0.631973	0.489482		0.481586	0.478129	0.406419	0.202929	0.275472	0.247451	0.5754	0.523492	0.613977	0.582154	0.442013	0.468801
ENSMUSG00000096047	0	0	0	0	0	0	0	0	0	0	0	0		0	0	0	0	0	0	0	0	0	0	0	0
ENSMUSG00000101262	0.161455	0.027641	0.166168	0.232567	0.0789934	0.157518	0.052875	0.171533	0.058027	0.154123	0.152485	0.153607		0.0576237	0.0873475	0.292805	0.382429	0.191527	0.194733	0.173988	0.220522	0.121966	0.197426	0.198043	0.0631056
ENSMUSG00000101337	0.0333594	0.0214167	0.0171666	0.0280306	0.0326428	0.0284777	0.0409684	0.0354416	0.0404642	0.0191068	0.0330813	0.0285642		0.058042	0.0496307	0.045374	0.0169321	0.0339196	0.0215546	0.022468	0.0146455	0.0283503	0.0356927	0.0204596	0.0195581
ENSMUSG00000025986	11.1488	12.0897	12.3084	9.78706	9.29779	9.5478	11.792	10.0492	8.29266	9.87705	10.0261	10.8382		11.2077	12.6788	11.7184	10.4685	10.4242	10.4115	10.1373	9.87237	10.8548	11.8297	11.9619	12.7289
ENSMUSG00000100213	4.97353	6.18731	5.34622	3.55552	2.54149	2.91135	5.53786	5.98849	5.6008	5.57062	6.70134	7.3185		5.20685	5.38138	5.05103	2.3561	3.87707	2.74223	6.78881	8.66923	5.38515	6.48703	8.06634	6.09098
ENSMUSG00000103129	0.366653	0.432421	0.461214	0	0.0398641	0.0397458	0.0800503	0.0432821	0.117134	0.171113	0.138513	0.108525		0.232639	0.35264	0.369411	0.0413557	0.069039	0.0982722	0.0439015	0.0317962	0.0769377	0.0664208	0.0999426	0.0477695
ENSMUSG00000100160	0	0	0	0.169923	0	0	0	0	0	0	0.20054	0		0.18946	0	0	0	0	0	0	0	0	0.216371	0	0
ENSMUSG00000101921	0	0	0	0	0	0	0	0	0	0	0	0		0	0	0	0	0	0	0	0	0	0	0	0
ENSMUSG00000101447	0	0	0	0	0	0	0	0	0	0	0	0		0	0	0	0	0	0	0	0	0	0	0	0
ENSMUSG00000081185	0	0	0	0	0	0	0	0	0	0.0825797	0	0		0	0	0	0	0	0	0.0776858	0	0	0	0.0884266	0
ENSMUSG00000103246	0	0	0	0	0	0	0	0	0	0	0	0		0.028975	0	0	0	0	0	0	0	0	0	0	0.063463
ENSMUSG00000098876	0	0	0	0	0	0	0	0	0	0	0	0		0	0	0	0	0	0	0	0	0	0	0	0
ENSMUSG00000100530	0	0	0	0	0	0	0	0	0	0	0	0		0	0	0	0	0	0	0	0	0	0	0	0
ENSMUSG00000104067	0	0	0	0	0.0567601	0	0.512905	0.246507	0.437797	0.132893	0.19722	0.264897		0	0	0	0	0	0.0599675	0.250035	0	0.262913	0.0709295	0	0.0680161
ENSMUSG00000100033	0.271174	0.250694	0.279091	0.104163	0.344954	0.291018	0.559485	0.432151	0.409333	0.590202	0.153665	0.464389		0.232279	0.146706	0.295072	0.275278	0.248155	0.252309	0.263001	0.31747	0.184365	0.364749	0.365889	0.254376
ENSMUSG00000094968	0	0	0	0	0	0	0	0	0	0	0	0		0	0	0	0	0	0	0	0	0	0	0	0
ENSMUSG00000088017	0	0	0	0	0	0	0	0	0	0	0	0		0	0	0	0	0	0	0	0	0	0	0	0
ENSMUSG00000101996	0	0	0	0	0	0	0	0	0	0	0	0		0	0	0	0	0	0	0	0	0	0	0	0
ENSMUSG00000096973	0.1066	0.164248	0.0548558	0	0	0.0520001	0	0	0.0574679	0	0	0		0	0.115341	0	0	0	0	0	0.0623993	0	0.0651746	0	0
ENSMUSG00000064943	0	0	0	0	0	0	0	0	0	0	0	0		0	0	0	0	0	0	0	0	0	0	0	0
ENSMUSG00000100866	0	0	0	0	0	0	0	0	0	0	0	0		0	0	0	0	0	0	0	0	0	0	0	0
ENSMUSG00000101721	0	0	0	0	0	0	0	0	0	0	0	0		0	0	0	0	0	0	0	0	0	0	0	0
ENSMUSG00000099376	0	0	0	0	0	0	0	0	0	0	0	0		0	0	0	0	0	0	0	0	0	0	0	0
ENSMUSG00000097883	0	0	0	0.099836	0	0	0	0	0	0	0	0		0.0556573	0	0.0565627	0	0	0	0	0	0	0	0	0
ENSMUSG00000092790	0	0	0	0	0	0	0	0	0	0	0	0		0	0	0	0	0	0	0	0	0	0	0	0
ENSMUSG00000099698	0	0	0	0	0	0	0	0	0	0	0	0		0	0	0	0	0	0	0	0	0	0	0	0
ENSMUSG00000099454	0	0	0	0	0	0	0	0	0	0	0	0		0	0	0	0	0	0	0	0	0	0	0	0
ENSMUSG00000051616	0	0	0	0	0	0	0	0	0	0	0	0		0	0	0	0	0	0	0	0	0	0	0	0
ENSMUSG00000099627	0	0	0	0	0	0	0	0	0	0	0	0		0	0	0	0	0.0313225	0	0	0	0	0	0	0
ENSMUSG00000099577	0	0	0	0	0	0	0	0	0	0	0	0		0	0	0	0	0	0	0	0	0	0	0	0
ENSMUSG00000099882	0	0	0	0	0	0	0	0	0	0	0	0		0	0	0	0	0	0	0	0	0	0	0	0
ENSMUSG00000101760	0	0	0	0	0	0	0	0	0	0	0	0		0	0	0	0	0	0	0	0	0	0	0	0
ENSMUSG00000099608	0	0	0	0	0	0	0	0	0	0	0	0		0	0	0	0	0	0	0	0	0	0	0	0
ENSMUSG00000099864	0	0	0	0.0695139	0	0	0	0	0	0	0	0		0	0	0.0787671	0	0	0	0	0	0.0820245	0	0	0
ENSMUSG00000098249	0	0	0	0	0	0	0	0	0	0	0	0		0	0	0	0	0	0	0	0	0	0	0	0
ENSMUSG00000100451	0	0	0	0	0	0	0	0	0	0	0	0		0	0	0	0	0	0	0	0	0	0	0	0
ENSMUSG00000099941	0	0	0	0	0	0	0	0	0	0	0	0		0	0	0	0	0	0	0	0	0	0	0	0
ENSMUSG00000084531	0	0	0	0	0	0	0	0	0	0	0	0		0	0	0	0	0	0	0	0	0	0	0	0
ENSMUSG00000100816	0	0	0	0	0	0	0	0	0	0	0	0		0	0	0	0	0	0	0	0.0264399	0	0	0	0
ENSMUSG00000026109	2.1548	2.15706	2.30641	2.8217	2.15452	1.67416	1.26252	1.39023	2.23883	2.38756	5.6923	1.69074		2.68469	2.1365	2.06333	2.11582	2.15912	1.79833	4.03616	1.79798	2.10426	2.09832	2.42205	2.15913
ENSMUSG00000100671	0	0	0	0	0	0	0	0	0	0	0	0		0	0	0	0	0	0	0	0	0	0	0	0
ENSMUSG00000092906	0	0	0	0	0	0	0	0	0	0	0.589708	0		1.11425	0.563002	0.566187	0.528206	0.529071	0	0.560722	0	0	0.636259	0.638247	0
ENSMUSG00000101242	0	0	0	0	0	0	0	0	0	0	0	0		0	0	0	0	0	0	0	0	0	0	0	0
ENSMUSG00000099924	0.809229	0.783737	0.809056	0.577275	0.565604	0.428583	0.636035	0.515843	0.598294	0.529702	1.93906	0.501532		0.61889	0.675454	0.704433	0.657179	0.799309	0.645369	0.99662	0.622565	0.41918	0.452351	0.90753	0.569324
ENSMUSG00000099625	0.103943	0.128124	0.149768	0.179669	0.162736	0.162254	0.183818	0.154603	0.112072	0.142881	0.329844	0.142403		0.0890341	0.112467	0.226206	0.0844127	0.105689	0.107458	0.336034	0.0730131	0.0235561	0.0762604	0.0509992	0.0731281
ENSMUSG00000101799	0	0	0.0211943	0.0197755	0	0	0.0404643	0	0.0222035	0	0	0		0	0	0	0	0	0	0	0	0.0233346	0	0.0505196	0
ENSMUSG00000045954	46.3607	40.7301	42.1548	31.6018	34.3729	36.6877	18.7432	17.2528	23.6298	24.3167	44.1586	24.471		49.344	38.3059	31.6155	23.5922	28.7908	32.9896	27.6028	24.6707	22.4554	22.4865	27.009	26.7872
ENSMUSG00000099741	0	0	0	0	0.0501704	0	0	0	0	0	0.0581078	0		0	0	0	0	0	0	0	0	0	0	0	0
ENSMUSG00000101702	0	0	0	0	0	0	0	0	0	0	0	0		0	0	0	0	0	0	0	0	0	0	0	0.11245
ENSMUSG00000026107	4.48975	2.71248	6.00834	5.30326	5.8759	3.31839	2.02933	2.37185	2.64714	2.44401	2.17973	3.57961		9.4224	2.62971	2.69842	5.35497	4.35135	4.46894	3.04557	2.19373	2.28445	2.14762	1.89642	1.75484
ENSMUSG00000099413	0.0264155	0	0	0.0634168	0.0646201	0	0.0129762	0.0140321	0.0142406	0	0	0.0452368		0.0282832	0	0.0143717	0.0134076	0	0	0	0	0.014966	0.0323006	0	0
ENSMUSG00000103424	0	0	0	0.0426783	0.0217441	0	0	0	0	0	0	0		0	0	0.0483593	0.0451153	0.0225946	0	0	0.0260151	0.0251796	0	0	0
ENSMUSG00000101741	0.222058	0.228096	0.30472	0.177701	0.362146	0.144428	0.0727217	0	0.0798076	0.127184	0.20972	0.0422529		0.237759	0.200223	0.241626	0.112709	0.225787	0.191305	0.0797647	0.259968	0.0419365	0.135765	0.181586	0.130189
ENSMUSG00000018417	20.4721	21.5741	22.5232	13.856	14.462	17.4122	6.56409	7.78632	8.00176	13.5496	12.9585	13.3041		16.7787	18.4416	18.5618	12.2299	13.0966	13.1597	6.38643	6.39087	7.14024	6.15706	6.24201	6.68073
ENSMUSG00000101724	2.50647	3.41877	2.91795	1.97291	2.01035	2.76605	1.25145	1.48425	1.24048	1.41206	1.58331	1.40733		1.7158	2.00066	2.77206	1.33476	2.50678	1.65668	1.23981	1.25072	1.86239	1.40683	1.51203	0.915426
ENSMUSG00000100313	1.93475	2.05217	1.81808	1.09053	1.29642	1.74395	0.929756	0.893699	1.0657	1.03587	1.14402	1.00839		1.57618	1.52454	1.67047	1.00336	1.11192	1.30445	0.793179	1.42797	0.810201	0.745739	0.851252	0.591814
ENSMUSG00000100696	0	0	0	0	0	0	0.125321	0	0	0	0	0		0.136577	0	0	0	0.129699	0	0	0	0	0	0.156464	0
ENSMUSG00000099135	0	0	0	0	0	0	0	0	0	0	0	0		0	0	0	0	0	0	0	0	0	0	0	0
ENSMUSG00000072324	0	0	0	0	0	0	0	0	0	0	0	0.100333		0.0940962	0	0.0956269	0	0	0	0	0	0.0995816	0	0.107798	0
ENSMUSG00000062939	0.352891	0.125477	0.181596	0.651693	0.411716	0.317802	0.320036	0.418177	0.234146	0.388692	0.384559	0.588834		0.203454	0.264344	0.236301	0.936912	0.814239	0.617392	0.541172	0.333688	0.430629	0.282143	0.283024	0.445618
ENSMUSG00000101628	0.0297586	0	0	0.0142885	0.0291193	0.0145165	0.0146185	0.015808	0	0	0.0168631	0		0.0159313	0	0	0.0302089	0.0151291	0.0461471	0.0320685	0.0174195	0	0.0181943	0	0
ENSMUSG00000078291	0	0	0	0	0.119039	0.118685	0	0	0	0	0	0.138887		0	0.526511	0.132372	0	0	0	0	0.142421	0	0.148755	0.14922	0
ENSMUSG00000109599	8.84877	8.48961	8.87595	3.27821	3.69203	5.65308	0.750215	0.954425	0.678024	4.93954	4.17432	5.79478		5.09792	7.63037	4.98535	1.18553	1.87255	1.67171	0.0484042	0.105172	0.101795	0.274624	0.16529	0.368682
ENSMUSG00000026104	8.88345	6.94445	6.69151	11.2583	11.3127	8.72456	9.71605	11.5518	6.34821	7.37151	6.6141	8.07306		6.18529	6.1065	5.95592	9.8288	7.41563	10.6902	5.5796	5.27363	6.32795	4.66703	4.93566	4.88297
ENSMUSG00000099569	0	0	0	0	0	0	0	0	0.0638101	0	0	0		0	0	0	0	0	0	0	0	0	0	0	0
ENSMUSG00000026103	19.2491	18.1986	19.053	16.9397	16.4278	18.5277	14.1349	15.5113	14.116	15.6169	16.6929	16.5329		16.8394	17.1757	18.773	16.6952	18.4615	18.2834	16.4065	17.1334	16.8481	15.1597	15.3783	16.5956
ENSMUSG00000099648	0	0	0	0	0	0.0366491	0	0	0	0	0	0		0	0	0	0	0	0	0	0	0	0	0	0
ENSMUSG00000065192	0	0	0	0	0	0	0	0	0	0	0	0		0	0	0	0	0	0	0	0	0	0	0	0
ENSMUSG00000002881	21.9443	23.0415	21.7538	19.9284	21.6109	20.2337	9.49533	10.2816	9.50839	12.6862	14.7158	13.6534		19.4473	18.4459	19.8752	18.7111	18.2074	17.7568	11.3266	10.5044	12.5636	9.87443	10.2355	11.573
ENSMUSG00000097833	0	0.0541996	0	0	0	0	0	0	0	0	0	0		0.112991	0.0570916	0	0	0	0	0	0	0	0	0.0647219	0
ENSMUSG00000101501	0.68104	0.816155	1.28502	0.654002	0.222137	0.110739	0.557586	0.241183	0.367149	1.04018	0.385921	1.0367		0.364597	0.982518	0.494038	0	0.346239	0.352034	0.122317	0.398654	0.257235	0.138795	0.139229	0.266188
ENSMUSG00000100120	0.299878	0.9241	0.231474	0.71993	0.073359	0.365707	0.589243	0.398244	0.242497	0.257635	0.67972	0.256772		0.401352	0.811173	1.22364	0.304416	0.533599	0.155009	0.403944	0.438842	0.1699	0.0916721	0.275876	0.351627
ENSMUSG00000099878	0	0	0.0183785	0	0	0.0174217	0	0	0	0	0	0		0	0	0	0	0	0.0184609	0	0	0	0	0	0
ENSMUSG00000100007	0.0818592	0	0	0.0786092	0	0	0	0	0	0	0	0		0	0.088572	0.089073	0	0	0	0.0882133	0.0958344	0	0	0	0
ENSMUSG00000043015	2.04928	2.21941	2.23137	1.81106	2.01979	1.55743	2.33433	2.46906	2.19353	2.00725	2.4908	2.38199		1.86823	1.92008	2.141	1.64313	2.03085	1.82688	2.64042	3.10323	2.73434	2.01557	1.97633	2.20267
ENSMUSG00000103630	0.277261	0.233019	0.389121	0.266253	0.320634	0.2705	0.39622	0.348125	0.190237	0.346478	0.171397	0.316542		0.377829	0.436361	0.191988	0.179109	0.281917	0.182405	0.353107	0.265578	0.171366	0.215748	0.24734	0.147776
ENSMUSG00000041439	7.35534	7.94887	7.37949	7.12463	7.06613	5.83671	5.20025	5.16892	3.98592	5.86574	5.731	5.35042		7.39687	8.08976	8.21195	5.60646	6.3752	6.33669	4.52733	5.30716	4.89074	4.50483	4.43276	4.76151
ENSMUSG00000100302	0.654019	1.10523	0.390839	1.13455	1.11479	0.493991	0.704738	0.851741	0.500439	0.555847	0.621667	0.794849		0.609907	0.821789	0.849394	0.621083	0.986778	0.763375	0.613846	0.839772	0.788897	0.670741	0.62108	0.5195
ENSMUSG00000100230	0	0	0	0	0	0	0	0	0	0	0	0		0	0	0	0	0	0	0	0	0	0	0	0
ENSMUSG00000026102	8.35489	9.62666	8.49831	5.90606	6.47187	7.40509	8.87183	8.10714	7.62237	8.2007	8.18726	8.52618		9.01532	9.94667	10.056	5.46702	6.95663	7.58609	7.54814	8.53359	8.67436	8.73408	9.0308	9.28155
ENSMUSG00000041426	5.49042	3.93801	4.56162	2.92358	3.84476	2.95329	3.17856	3.15154	2.56243	3.57687	3.68628	3.87187		5.1171	3.41611	4.67181	2.67669	3.57182	3.14739	2.66387	2.93463	2.91901	3.01212	3.21304	4.00715
ENSMUSG00000089802	0	0	0	0	0	0	0.0598984	0.0647724	0	0	0	0		0	0	0.0663398	0	0	0	0	0	0	0	0.074783	0
ENSMUSG00000043629	0.46121	0.324146	0.499656	0.454554	0.320662	0.343393	0.286184	0.348156	1.07307	0.514416	0.577723	0.374128		0.662759	0.354574	0.35658	0.628358	0.382568	0.288592	1.37332	0.369438	0.660136	0.504599	0.684826	0.526567
ENSMUSG00000026100	0.0194283	0	0	0	0	0	0.0190878	0	0.460848	0	0.0440373	0.0221808		0.228822	0.294301	0.169124	0	0.0197546	0	0.460601	0	0	0	0	0.045562
ENSMUSG00000089334	0	0	0	0	0	0	0	0	0	0	0	0		0	0	0	0	0	0	0	0	0	0	0	0
ENSMUSG00000060715	0.135273	0.138952	0.278444	0.0649512	0.132367	0.197962	0.265804	0.287433	0.364629	0.0774783	0.0766544	0.154438		0.217257	0	0.515179	0.06866	0.0687724	0.139847	0.21866	0.395918	0.536485	0	0.165928	0.0793084
ENSMUSG00000026098	1.4424	1.59615	1.5634	1.11748	1.26823	1.06052	1.49927	1.36216	1.47256	1.35695	1.42149	1.40809		1.24596	1.50791	1.66808	1.04689	1.24699	1.21743	1.11133	1.18287	1.45282	1.43998	1.36755	1.72399
ENSMUSG00000100763	0.196462	0.201805	0.303296	0.0943311	0.0961209	0	0	0.104362	0	0	0.222656	0		0	0.106286	0.320663	0	0.0998806	0.101552	0	0	0	0	0	0
ENSMUSG00000026097	1.46137	1.0313	1.1596	1.89613	1.36448	1.13188	1.95088	1.84888	1.5516	1.40566	1.61828	1.7703		1.62442	1.24324	1.27455	1.6307	1.72411	1.57998	1.77917	1.55414	1.78232	1.71875	1.64202	1.8836
ENSMUSG00000100679	0	0	0	0	0	0	0	0	0	0	0	0		0	0	0	0	0	0	0	0	0	0	0	0
ENSMUSG00000026096	1.76119	1.68614	1.8654	1.4696	1.69826	1.17608	1.95711	1.8802	2.12937	1.5082	1.9088	1.88382		1.8491	1.89637	1.88849	1.5188	1.67776	1.63513	1.95318	1.86168	2.09253	2.09085	2.13933	2.04506
ENSMUSG00000099913	0	0.017181	0	0	0	0	0	0.0177702	0	0	0.0189562	0		0	0	0	0.0169793	0	0.0172917	0	0	0.0189528	0	0	0
ENSMUSG00000101838	0.159374	0.0409271	0.0820133	0.0765233	0	0.116616	0.117435	0.126991	0.0859187	0.0456411	0.180623	0.0454883		0.0426607	0.0862217	0	0.202232	0.202563	0.0411907	0.128809	0.139937	0.180591	0.146161	0.0488726	0.233596
ENSMUSG00000026095	0.804392	0.933377	0.935191	1.27312	1.2827	1.22076	1.30252	0.965381	1.07609	1.04088	0.962286	1.05441		0.877218	0.83812	0.85907	1.119	1.0148	1.06259	0.850779	0.976598	1.2997	0.801455	1.05977	1.03054
ENSMUSG00000100267	0	0	0	0	0	0	0	0	0	0	0	0		0	0	0	0	0	0	0	0	0	0	0	0
ENSMUSG00000099450	0	0	0	0	0	0	0	0	0	0	0	0		0	0	0	0	0	0	0	0	0	0	0	0
ENSMUSG00000100069	0	0	0	0.148871	0	0	0	0	0	0	0	0		0	0	0	0	0	0	0	0	0	0	0	0
ENSMUSG00000096141	0.0329309	0.0211415	0.0254192	0.0118588	0.00402794	0.012048	0	0.00437329	0.00443827	0	0.00466519	0.00469954		0	0.00890785	0.0134374	0	0.00418549	0.00425554	0.00887177	0	0	0.00503346	0.00504919	0.00965342
ENSMUSG00000092657	0	0	0	0	0	0	0	0	0	0	0	0		0	0	0	0	0	0	0	0	0	0	0	0
ENSMUSG00000026094	5.63545	4.47688	4.71508	17.2182	15.9679	7.52518	6.8113	6.13795	5.71552	7.25659	7.43214	8.27374		4.23242	5.30797	4.58803	15.197	14.9642	10.8556	12.2332	8.27066	9.02722	7.11407	8.01902	7.8915
ENSMUSG00000102405	0	0	0	0	0	0	0	0	0	0	0	0		0	0	0	0	0	0	0	0	0	0	0	0
ENSMUSG00000042807	6.81529	7.05483	7.1897	2.80654	2.84391	3.7265	3.30604	3.54056	3.25179	5.22635	4.79814	5.14397		8.11425	9.30665	9.77448	3.43242	4.41208	4.56566	2.43206	2.9083	2.61712	4.21896	3.97821	4.17417
ENSMUSG00000098443	0	0	0	0	0	0	0	0	0	0	0	0		0	0	0	0	0	0	0	0	0	0	0	0
ENSMUSG00000087949	2.30498	4.2618	1.42336	1.32808	0	0	1.35875	0.489771	0.497047	0	0.52246	0		1.97437	1.9952	3.00973	1.40392	0.468738	0.953167	0	0	0.522367	2.25481	1.13093	0.540549
ENSMUSG00000102868	2.62768	2.85909	2.32377	1.12149	0.933263	1.63311	1.62547	1.90249	1.80483	2.45262	2.42654	2.15552		3.18861	4.65436	3.87586	1.16577	1.68225	1.54943	1.09071	1.16215	1.01455	1.54705	1.93389	1.64327
ENSMUSG00000094013	0	0	0	0	0	0	0	0	0	0	0.55664	0		0	0	0	0	0	0	0	0	0	0	0	0
ENSMUSG00000025983	0.041867	0.0215028	0	0.0201024	0.0204838	0.0306346	0.0514165	0.0222401	0.0451411	0.0599488	0.0355868	0.0238993		0.0224137	0.0792756	0.0341674	0.0318754	0.0106425	0.0541033	0.101513	0.110283	0.0711609	0.076792	0.0898707	0.012273
ENSMUSG00000041303	5.61283	5.53529	5.33739	6.19951	6.09787	5.48638	6.37412	5.94049	5.66059	5.85505	5.99837	5.5187		5.62124	5.1379	5.27146	6.09856	5.82644	6.18871	6.70396	6.45863	6.75905	6.3153	7.15964	6.60644
ENSMUSG00000109809	0	0	0	0	0	0	0	0	0	0.145941	0	0		0	0	0.069315	0	0	0	0	0	0	0	0	0
ENSMUSG00000073678	2.62594	2.59011	2.67004	2.31813	2.13302	2.0094	4.84899	4.05704	3.67727	3.54804	4.42822	4.18993		2.46948	2.44761	2.45801	1.83707	1.9784	2.09328	3.74348	3.28537	3.53119	3.18003	3.28699	3.4241
ENSMUSG00000104136	0.537876	0.585004	0.455887	0.486137	0.557281	0.432155	0.683873	0.941209	0.648166	0.797359	0.717164	0.830812		0.474277	0.376578	0.413136	0.385422	0.353882	0.490643	0.71601	0.851951	0.60948	1.08329	0.776195	0.704894
ENSMUSG00000101130	0	0.0932346	0	0	0	0	0	0	0.0978642	0	0.102868	0		0	0	0	0	0	0	0	0	0.102849	0	0	0
ENSMUSG00000052331	4.76783	4.62329	4.72004	6.20203	5.53246	3.82325	5.56938	5.59323	4.47711	6.3492	6.3153	6.64117		4.26735	4.39662	4.85315	4.98299	5.08539	4.66457	5.20584	4.97848	4.8312	4.21161	3.72907	4.06905
ENSMUSG00000101674	0	0	0	0	0.0192891	0	0	0	0	0.0225809	0.0223408	0		0	0	0	0	0	0	0	0	0	0	0	0
ENSMUSG00000102503	1.30452	1.26343	1.61113	1.82541	1.67769	1.3818	2.19712	1.70273	1.68785	2.13477	2.19656	2.12763		1.67611	1.49216	1.54115	1.70262	1.59172	1.34863	1.36562	1.78904	1.26702	1.36728	1.32583	1.70445
ENSMUSG00000089245	0	0	0	0	0	0	0	0	0	0	0	0		0	0	0	0	0	0	0	0	0	0	0	0
ENSMUSG00000102642	2.5799	2.61081	2.98958	4.20253	3.34728	2.05088	3.30448	3.49215	3.02892	3.67771	4.48328	4.12357		2.63955	2.58469	2.91123	2.79354	3.34219	3.1808	3.43917	3.13222	3.59464	2.38354	3.04734	3.09233
ENSMUSG00000025982	28.5232	28.5155	28.295	40.2627	38.8286	34.9841	39.1943	37.5761	34.5562	36.2051	38.125	37.4875		30.4113	30.237	30.1164	40.9712	42.2413	41.2186	41.5956	41.7152	41.9677	40.592	41.076	43.0274
ENSMUSG00000103030	0.0292941	0.120363	0.180896	0.112524	0.257983	0.200058	0.374148	0.311225	0.25268	0.335566	0.199199	0.167221		0.282289	0.221874	0.159378	0.208162	0.327646	0.33313	0.441952	0.342952	0.265551	0.465668	0.43119	0.515239
ENSMUSG00000025981	3.54368	2.70757	3.33194	6.30183	7.50233	9.37944	4.94296	5.31032	5.11798	4.59805	4.78467	4.96975		4.61398	4.08279	3.84406	11.3915	10.576	10.4025	6.44708	6.69676	6.14707	6.39278	6.23835	6.69448
ENSMUSG00000101122	1.23886	1.07162	1.67766	1.81581	2.23308	2.9262	2.11398	2.56309	2.31997	2.31541	1.92131	2.53098		1.25664	1.62265	1.48993	4.5009	4.04417	5.19038	2.81057	2.29004	3.25086	4.06621	3.51907	2.06428
ENSMUSG00000025980	10.6619	8.23432	9.233	17.5355	20.3402	17.66	11.5108	11.264	8.77189	11.6209	9.82905	10.9461		10.6277	9.72831	9.76169	20.8186	21.7223	19.6182	10.7178	11.0849	13.3886	12.9886	13.1024	13.8313
ENSMUSG00000073676	6.31071	4.76104	5.10054	8.66227	8.75685	8.06997	5.74472	6.09854	4.57459	5.06437	6.22274	5.82081		6.56605	4.89934	5.3926	10.8942	11.057	10.21	5.30214	4.09058	6.74682	7.23712	7.78454	7.73418
ENSMUSG00000100736	0.132377	0.203965	0.0681206	0.0635606	0	0	0	0.281279	0.0713645	0	0.150026	0.151131		0.0708684	0.143232	0.0720213	0.20157	0.2019	0.136853	0	0.154977	0.0749997	0.242804	0.243563	0.0776103
ENSMUSG00000089670	0.0530309	0.0544731	0.218316	0	0	0	0.0521013	0.0563409	0.114356	0.182242	0.0601014	0.060544		0	0.114759	0.173113	0.107667	0	0.109648	0	0.124169	0.180272	0.194537	0.0650484	0.124364
ENSMUSG00000025979	9.02775	8.47269	8.99049	10.6651	10.751	10.7402	12.6768	12.9378	9.09182	9.42379	11.9612	11.6909		10.6976	11.0564	9.91754	14.9992	14.7266	14.7493	12.1431	13.1415	13.3328	12.7465	14.4859	15.7388
ENSMUSG00000061863	0	0	0.176182	0	0	0.16701	0	0.181869	0.184571	0.196093	0.388016	0.390873		0.366577	0	0.18627	0	0	0.176972	0.368944	0.200409	0	0.209323	0.209977	0.200725
ENSMUSG00000025978	4.63682	5.3238	4.79982	2.71634	2.65401	2.34921	8.70654	9.31991	7.04553	9.63866	9.20139	9.56551		7.20741	7.27377	6.64284	3.49843	4.00475	4.19208	7.20573	8.17408	7.27256	8.32967	7.75181	7.36826
ENSMUSG00000097649	0.35162	0.555665	0.61242	0.54545	0.423466	0.316657	2.44477	2.44255	1.89558	2.13785	2.08446	2.34685		0.810883	1.28769	0.912368	0.604053	0.577539	0.866828	2.44836	3.1032	2.72771	2.08364	3.05229	2.28349
ENSMUSG00000046994	1.61467	1.58689	1.76717	2.59619	2.52251	2.85551	2.26755	2.30375	2.09716	2.03618	2.09363	2.17811		1.87333	1.7068	1.87342	3.26876	3.34508	3.2327	2.03084	2.47868	2.54671	2.68565	2.8824	2.99001
ENSMUSG00000025977	0.029911	0	0.0153921	0	0.0292685	0	0	0.015889	0	0	0	0		0.016013	0.0161819	0	0	0	0	0.0161164	0.0175087	0.0338929	0.0182875	0.0183446	0
ENSMUSG00000100215	8.22809	8.58818	7.78536	8.53863	7.66176	9.3222	9.38772	10.4336	10.0163	8.3612	7.36986	8.63623		7.10474	8.75924	8.95319	8.75676	10.9301	12.0734	12.8711	12.2741	12.331	14.2805	13.1856	16.3393
ENSMUSG00000101945	0	0	0	0	0	0	0	0	0.162826	0.17299	0	0		0	0	0	0	0	0	0	0.176798	0	0	0	0
ENSMUSG00000101085	0	0	0	0	0	0	0	0	0	0	0	0		0	0	0	0	0	0	0	0	0	0	0	0
ENSMUSG00000038349	2.10623	2.3734	2.29713	1.89431	1.76107	2.16222	1.17364	1.0103	1.75405	1.6925	1.96843	1.39074		2.17942	2.14289	2.16357	1.74718	1.92584	2.12057	2.32901	1.62854	1.73653	0.961001	1.12789	1.12426
ENSMUSG00000102145	0.85725	1.00943	1.28038	1.12439	1.16619	1.42791	0.90385	0.888543	1.26244	1.08977	1.50471	1.08612		1.10815	1.04066	1.20581	1.53881	1.32873	1.32935	1.94898	1.35853	1.42152	0.67752	0.615521	0.502591
ENSMUSG00000100309	0	0	0	0	0	0	0	0	0	0	0	0		0	0	0	0	0	0	0	0	0	0	0	0
ENSMUSG00000102831	0.954922	1.52207	1.76226	2.18185	1.09551	1.99177	1.03524	1.39934	1.0296	1.47107	1.86593	1.31577		1.48078	1.71017	1.46904	2.97497	2.17628	1.83825	2.59035	1.8504	1.2686	0.926083	1.2521	0.888045
ENSMUSG00000099950	0	0	0	0	0	0	0	0	0	0	0	0		0	0	0	0	0	0	0.0241505	0	0	0	0	0
ENSMUSG00000102491	0	0	0	0	0	0	0	0	0	0	0	0		0	0	0	0	0	0	0	0	0	0	0	0
ENSMUSG00000100372	0	0	0	0	0	0	0	0	0	0	0	0		0	0	0	0	0	0	0	0	0	0	0	0
ENSMUSG00000100944	0	0	0	0	0	0	0	0	0	0	0	0		0	0	0	0	0	0	0	0	0	0	0	0
ENSMUSG00000101332	0	0	0	0	0	0	0	0	0	0	0	0		0	0	0	0	0	0	0	0	0	0	0	0
ENSMUSG00000045336	0	0	0	0	0	0	0	0	0	0	0	0		0	0	0	0	0	0	0	0	0	0	0	0
ENSMUSG00000038331	0.379365	0.437398	0.414344	0.46839	0.560611	0.445647	1.23985	1.21736	1.369	0.913474	0.693176	0.680602		0.513953	0.469113	0.454918	0.502994	0.629772	0.65632	0.800938	1.31426	1.25451	1.39165	1.37701	0.953208
ENSMUSG00000087022	0.37285	0.392331	0.280781	0.18339	0.266956	0.283909	0.0446725	0.0772921	0.0294152	0.104171	0.0927573	0.0622935		0.0876321	0.226312	0.158325	0.0646205	0.046233	0.0940137	0.0391991	0.0319393	0.0103045	0.0222399	0.0669282	0.0639792
ENSMUSG00000104310	0	0	0	0	0	0	0	0	0	0	0	0		0	0	0	0	0	0	0	0	0	0.0349631	0	0
ENSMUSG00000094128	0	0	0	0	0	0	0	0	0	0	0	0		0	0	0	0	0	0	0	0	0	0	0.532752	0
ENSMUSG00000099945	0	0	0	0	0	0	0	0	0	0	0	0		0	0	0	0	0	0	0	0	0	0	0	0
ENSMUSG00000101429	0	0	0.0491558	0	0.0155785	0.0155323	0.0469244	0.0169142	0	0.0182371	0	0		0.0340924	0.0172261	0.034647	0.0161614	0	0	0	0.0186385	0.0180399	0.0584024	0.0195283	0.0186679
ENSMUSG00000101129	0	0	0	0	0	0	0	0.0571483	0	0	0	0.0614115		0	0	0	0	0	0	0	0	0	0	0	0
ENSMUSG00000097519	0	0.0263074	0	0.0983764	0.100243	0.149918	0.276782	0.190466	0.22091	0.0586751	0.0290256	0		0.0548436	0.0277111	0.0557358	0.129992	0.104164	0.158861	0.193192	0.329816	0.145102	0.0939505	0.219903	0.0900915
ENSMUSG00000038323	2.50178	2.61988	2.45778	3.01087	2.70238	2.26643	3.63901	3.07216	2.71494	2.36336	2.48552	3.00459		2.34819	2.56632	2.28032	2.787	3.03934	3.12379	2.88854	2.75772	2.89005	2.42349	3.02886	3.37162
ENSMUSG00000048495	3.05065	2.36463	2.793	2.96548	3.38802	3.5423	2.83169	3.28084	2.7242	3.00146	3.11802	3.16234		3.22628	3.03757	3.01402	3.3438	3.53957	3.73426	3.08577	2.95797	3.81729	3.34126	3.55832	4.03795
ENSMUSG00000025971	1.91456	1.98033	1.94985	1.71042	1.94523	1.80279	2.31356	1.98445	1.96358	1.90276	2.13202	2.1858		1.79994	1.93442	1.96714	1.81486	1.85853	1.74481	1.99847	1.84311	1.86707	2.38189	2.15204	2.19801
ENSMUSG00000077776	0	0	0	0	0	0	0	0	0	0	0	0		0	0	0	0	0	0	0	0	0	0	0	0
ENSMUSG00000088353	0	0	0	0	0	0	0	0	0	0	0	0		0	0	0	0	0	0	0	0	0	0	0	0
ENSMUSG00000101826	0	0	0	0	0	0	0	0	0	0	0	0		0	0	0	0	0	0	0	0	0.0669099	0	0	0
ENSMUSG00000102685	0	0	0	0	0	0	0	0	0	0	0	0		0	0	0	0	0	0	0	0	0	0	0	0
ENSMUSG00000101151	0	0	0	0	0	0	0	0	0	0	0	0		0	0	0	0	0	0	0	0	0	0	0	0
ENSMUSG00000038305	2.56853	3.17546	2.99329	2.35358	2.5965	3.04151	2.85741	2.7358	3.17106	3.00217	3.12579	2.70111		3.06505	3.23882	2.78777	2.68038	3.16988	3.35807	3.26796	3.51204	3.81397	3.64426	3.36705	4.15364
ENSMUSG00000091283	0	0.275423	0	0	0.393556	0	0	0	0	0	0	0		0	0.145059	0	0	0.136317	0	0	0	0	0	0	0.157201
ENSMUSG00000054770	2.31312	2.48006	2.31811	2.2563	2.19208	2.05515	2.78997	2.62965	2.3324	2.49657	2.56184	2.38646		2.47667	2.36254	2.28775	1.8053	2.08423	2.19868	2.628	2.92144	2.61646	2.20927	2.405	2.10428
ENSMUSG00000026039	0.285006	0.292757	0.239292	1.05875	1.3724	0.987832	2.86642	2.21519	2.15106	0.781826	0.935015	0.787771		0.433646	0.292147	0.399894	0.746138	1.60148	1.67481	1.55181	1.94929	1.66573	1.17391	1.23277	1.35434
ENSMUSG00000063558	4.48127	3.92602	3.76561	2.70048	3.39675	2.29515	3.357	3.10973	4.04925	2.72254	2.72786	2.74794		4.79165	3.63166	4.10626	2.02591	1.99233	2.02567	3.063	2.63378	3.15223	2.50689	2.74468	3.07758
ENSMUSG00000064294	0.821968	1.02086	1.09206	0.875443	0.489898	0.277028	0.418463	0.198471	0.330328	0.427987	0.279468	0.443616		0.856084	0.905543	0.764308	0.326177	0.501462	0.478955	0.152997	0.314933	0.406425	0.667018	0.339134	0.841145
ENSMUSG00000089275	0	0	0	0	0	0	0	0	0	0	0	0		0	0	0	0	0	0	0	0	0	0	0	0
ENSMUSG00000038242	0	0.0128286	0	0	0.00611035	0	0.00613503	0.00663425	0	0	0.00707705	0.00712917		0	0.00675656	0.0135896	0	0	0	0	0	0	0	0.00765957	0
ENSMUSG00000089822	0	0	0	0	0	0.0137717	0.0138685	0	0.0152198	0	0.031996	0		0	0	0	0.0143295	0	0	0	0.0165258	0	0	0.0519444	0.0331037
ENSMUSG00000079554	0.036426	0.00935415	0.0562341	0	0.00891088	0	0.0447344	0.0096749	0.0883678	0.0521579	0.227054	0.0935699		0.0390016	0.0197065	0.00990901	0	0.0185189	0.0376576	0.078507	0.0319835	0.134144	0.0668121	0.0670209	0.117458
ENSMUSG00000103839	0.460821	0.34987	0.371171	0.423285	0.392106	0.195471	0.452743	0.553443	0.410448	0.527874	0.45414	0.43461		0.343238	0.411895	0.283417	0.284744	0.264838	0.289984	0.647727	0.469124	0.7719	0.514489	0.761857	0.634316
ENSMUSG00000051223	27.5213	25.8737	25.5754	40.7191	39.4005	38.381	35.002	32.797	30.1512	28.7046	33.7012	31.0632		23.7189	24.1806	22.942	43.5601	41.8294	39.9969	33.3928	33.1656	35.4523	31.5973	34.7649	35.8612
ENSMUSG00000026034	24.9326	27.1906	25.9198	23.0118	21.077	21.563	24.5718	27.4226	28.6244	30.2188	36.4013	33.1574		26.1904	28.4806	27.8822	23.4795	23.8531	24.1588	27.1743	31.4135	28.9913	32.787	33.9992	34.1758
ENSMUSG00000026035	3.55175	3.14512	2.96216	4.01055	3.90689	3.69217	4.40398	4.12476	3.86912	3.88617	3.85873	3.87316		3.47505	3.48521	3.63819	4.16497	4.42084	4.20362	3.88024	4.01473	4.08008	4.32807	4.1463	4.45188
ENSMUSG00000026036	1.68567	1.39773	1.39348	1.95029	2.04029	2.1201	2.14165	2.01384	1.91968	1.82238	1.49611	1.63079		1.69613	1.45766	1.5764	2.26095	2.25088	2.18358	2.22505	2.44105	2.52375	2.64896	2.3583	2.43696
ENSMUSG00000026037	6.86726	6.80209	6.73117	10.9779	10.6263	10.7808	8.91553	8.9172	7.19862	7.35144	7.62843	7.06237		6.03982	7.0176	6.53838	12.1304	12.3858	12.3677	8.32535	9.77839	9.63419	10.3133	11.1812	11.6791
ENSMUSG00000094245	0.491155	1.00902	0.505493	0.471655	0	0	0.965092	0	0.529564	0	0.55664	0		0.525883	0	0.534438	0.498587	0	0.507762	0	0	0	0.600581	0.602458	0.575912
ENSMUSG00000085054	0.227702	0.210505	0.246067	0.240528	0.222811	0.144397	0.648761	0.713648	0.417365	0.313002	0.438704	0.376944		0.304753	0.307968	0.260157	0.392951	0.243102	0.423722	0.576635	0.853042	0.657937	0.542943	0.614465	0.61409
ENSMUSG00000038174	5.6521	5.00331	5.08042	3.85597	4.49715	4.09206	3.70916	3.64466	3.30823	3.69473	4.08084	4.40488		6.0424	4.44856	5.14811	4.34642	4.2914	4.18274	3.67331	3.88336	3.94163	3.83726	4.2133	4.64178
ENSMUSG00000026032	18.2526	14.4332	18.7854	12.3687	14.2884	10.3485	13.2634	9.36662	11.2139	14.202	13.1142	13.5253		17.9944	14.0109	16.1886	12.1661	14.8473	13.8853	9.72335	8.95066	14.2045	12.6334	11.7436	12.6799
ENSMUSG00000100202	0	0	0	0	0	0	0	0	0	0	0	0		0.159857	0	0	0	0.303614	0	0	0	0	0	0	0
ENSMUSG00000099490	0	0	0	0	0	0	0	0	0	0	0	0		0	0	0	0	0	0	0	0	0	0	0	0
ENSMUSG00000059647	0	0	0	0	0	0	0	0	0	0	0	0		0	0	0	0	0	0	0	0	0	0	0	0
ENSMUSG00000047528	0.340453	0.254336	0.66893	0.237772	0.242284	0.0452934	0.0304078	0.0822053	0.133483	0.0886346	0.105231	0.265014		0.629635	0.217674	0.235745	0.21993	0.204555	0.127987	0.133411	0.0181171	0.0526058	0.0946144	0.0949101	0.0725826
ENSMUSG00000102059	1.34753	1.78789	1.32908	1.94104	1.92293	1.36945	1.76521	1.8492	1.51345	1.47929	1.52719	2.30766		3.84749	1.51878	2.01613	2.45086	2.2836	2.20573	1.93617	1.51185	1.08157	1.44178	1.6529	2.04092
ENSMUSG00000101046	0	0	0	0	0	0	0	0	0	0	0	0		0	0	0	0	0	0	0	0	0	0	0	0
ENSMUSG00000026031	10.6484	11.5261	11.177	17.2486	16.6179	17.6775	17.219	17.9767	13.6414	15.833	14.2919	15.7042		11.8055	12.0333	11.7719	24.8279	22.9199	23.7109	21.1887	24.8599	26.2049	21.1367	21.681	19.7967
ENSMUSG00000100236	0	0	0	0	0	0.113685	0	0	0	0	0	0		0	0	0	0	0	0	0	0	0	0	0	0
ENSMUSG00000026029	5.23175	4.77691	4.24401	18.1772	18.6643	11.7325	10.8512	8.62694	8.05	8.55253	8.23511	9.08386		4.99871	4.46179	4.03239	16.1356	14.869	15.8128	12.5873	10.4421	9.98329	7.73011	7.86569	8.49893
ENSMUSG00000102719	0.875666	0.54812	0.91531	2.70665	2.99899	2.24257	2.41964	2.02054	1.74077	1.64568	1.53514	1.76514		1.14268	0.903061	1.01239	2.84731	3.07456	2.60266	2.81617	2.43476	2.15502	1.53921	1.57759	1.98938
ENSMUSG00000099719	0.167014	0.0571852	0.114593	0.106922	0.0544753	0	0.0546954	0	0	0.191316	0.0630937	0.0635583		0.119215	0	0	0.169541	0	0.0575535	0	0.0651755	0	0.0680743	0.068287	0.0652782
ENSMUSG00000026028	30.5327	30.3044	30.4702	24.55	26.583	29.1661	26.5301	26.2863	21.3127	28.7584	24.5788	27.35		27.0869	30.2287	29.5364	25.5906	27.0046	26.9046	32.1277	36.813	35.8072	35.8029	34.8417	33.489
ENSMUSG00000026027	2.28872	2.29888	2.36299	1.94746	1.6584	1.71001	2.32688	2.26998	2.60827	2.22351	2.24911	2.44759		2.27218	2.44506	2.64803	1.66164	1.59071	1.70719	1.95125	2.38268	2.36361	2.28495	2.48755	2.13165
ENSMUSG00000047383	0	0	0	0.114959	0	0	0	0	0	0	0	0		0	0	0	0	0	0	0	0	0	0	0	0
ENSMUSG00000099752	0	0	0	0	0	0	0	0	0	0	0	0		0	0	0	0	0.0447914	0	0	0	0	0	0	0
ENSMUSG00000072295	0.0238447	0	0	0.022898	0.0933298	0.0232632	0.0702801	0.025333	0.077128	0	0	0		0	0	0.0518919	0.121027	0.0242451	0.0246509	0.0256955	0.0837464	0	0.029157	0	0
ENSMUSG00000077616	0	0	0	0	0	0	0	0	0	0	0	0		0	0	0	0	0	0	0	0	0	0	0	0
ENSMUSG00000038079	7.01741	6.43998	7.19963	6.08394	6.15633	6.3956	8.16955	8.34353	5.55012	7.61013	7.35468	6.58006		7.44293	7.11683	6.53473	6.43134	6.97868	6.86807	6.30572	7.2368	7.82697	7.77386	7.31246	6.8097
ENSMUSG00000097573	0.250364	0.467586	0.257672	0.218567	0.445428	0.222053	0.245975	0.290172	0.196322	0.36501	0.464309	0.311818		0.560502	0.295521	0.470556	0.231047	0.231425	0.447068	0.269798	0.346398	0.335274	0.278312	0.474608	0.160128
ENSMUSG00000079550	0.684544	0.397438	0.51308	0.207213	0.16746	0.152444	0.131585	0.181818	0.200564	0.417646	0.210819	0.331299		0.533776	0.418645	0.566748	0.219045	0.12105	0.130769	0.13631	0.0958208	0.101175	0.300248	0.182537	0.139595
ENSMUSG00000101586	0	0	0.0258546	0	0	0	0	0	0	0	0	0		0	0	0.027335	0.0255014	0	0	0	0	0	0	0	0
ENSMUSG00000099563	0	0	0	0	0	0	0	0	0	0	0	0		0	0	0	0	0	0	0	0	0	0	0	0
ENSMUSG00000026024	13.4207	15.8663	16.5407	9.40147	12.228	13.5793	7.28596	10.3718	9.48169	9.9151	9.93511	10.1978		10.9268	13.2218	12.3692	7.2585	8.46898	8.29032	4.77706	5.3971	5.21123	6.57103	7.09391	5.26933
ENSMUSG00000026023	1.17391	1.67956	1.55338	0.966263	0.738448	0.838515	1.62703	1.73715	1.31092	1.46479	2.87468	1.91461		1.27936	2.42695	1.48266	0.595839	0.98048	0.99689	1.64906	2.74865	1.90027	3.07597	3.59985	2.40886
ENSMUSG00000099922	0	0	0	0	0	0	0.0509698	0	0	0	0	0		0	0	0	0	0	0	0	0	0	0	0	0
ENSMUSG00000104502	0	0	0	0	0	0	0	0	0	0	0	0		0	0.034715	0	0	0	0	0	0	0	0	0	0
ENSMUSG00000041075	6.15754	7.4685	7.72171	6.36964	8.47622	9.12988	11.9739	10.1886	11.2652	8.38186	9.38353	6.89751		7.76003	7.12673	7.43202	6.68626	6.62646	7.34877	9.54713	11.0507	10.8535	6.76369	6.14475	7.50567
ENSMUSG00000097819	0	0.0150496	0.0150788	0	0	0	0	0	0	0	0	0		0	0	0.0159423	0	0	0.0151465	0.0157884	0	0	0	0	0.0171794
ENSMUSG00000047361	0.191662	0.226405	0.187394	0.0920261	0.121904	0.14959	0.169472	0.1629	0.16532	0.208573	0.238937	0.14223		0.348863	0.279961	0.396248	0.136193	0.155904	0.138699	0.165231	0.246821	0.217176	0.175772	0.129302	0.202262
ENSMUSG00000099811	0	0	0	0	0	0	0	0	0	0	0	0		0	0	0	0	0	0	0	0	0	0	0	0
ENSMUSG00000101409	0	0	0	0	0	0	0	0	0	0	0	0		0	0	0	0	0	0	0	0	0	0	0	0
ENSMUSG00000026021	3.44282	3.48444	3.0483	4.01111	3.64134	3.11189	4.52654	4.33008	3.0024	3.10283	4.21743	4.16179		3.30678	3.36906	3.77376	4.8826	4.58171	3.97796	4.85581	4.26768	4.44615	4.39558	4.50247	5.13522
ENSMUSG00000089276	0	0	0	0	0	0	0	0	0	0	0.700711	0		0	0	0	0	0	0	0	0	0	0	0	0
ENSMUSG00000103821	1.51597	1.26883	1.50244	1.61754	1.07135	1.06817	1.59972	2.02815	1.18049	1.25418	1.90899	2.0192		1.83357	1.57953	1.71066	0.968943	1.59852	1.48016	1.54289	1.80765	1.7814	1.57909	1.79064	2.30426
ENSMUSG00000101400	0.136503	0.420645	0.280976	0.262167	0.534283	0.266349	0.804661	1.59525	0.735888	1.25092	1.08292	1.24673		0.438464	0.44309	1.03973	0.138568	0	0.423355	1.02969	0.479421	0.928049	1.00149	1.00462	0.960352
ENSMUSG00000026020	2.86265	3.02079	2.82556	7.78727	8.31265	8.31659	4.38669	3.61742	3.42361	3.21764	3.29969	3.21802		3.16967	2.82255	3.06177	9.92295	10.0038	9.2975	4.25879	4.92983	4.67187	5.10728	4.87757	5.57341
ENSMUSG00000077345	1.81219	2.48197	1.8651	3.48049	4.13762	10.0187	2.96738	0.641768	0.651303	1.38392	2.05381	0.689644		1.29355	3.268	1.97189	6.13205	9.21313	6.86938	4.55667	3.53596	6.16032	2.21594	5.92763	4.95814
ENSMUSG00000077358	0	0	0	0	0	0	0	0	0	0	0	0		0	0	0	0	0	0	0	0	0	0	0	0
ENSMUSG00000089512	1.94643	1.99936	0.667751	4.98441	5.07898	6.96288	0.637437	2.06792	1.3991	2.22965	2.94126	2.96292		4.16811	0.702015	4.9419	7.90353	11.215	6.03672	2.79669	3.79788	5.88146	4.76016	2.38752	3.04309
ENSMUSG00000089093	0	0	0	1.2016	0.612199	1.22076	0	1.32938	0	0	0	0		0.669875	0	0.680772	0.635105	0.636145	0.646792	0.674202	0	0	0.765025	0.767416	0.733602
ENSMUSG00000067336	16.871	16.6484	17.8358	16.6923	17.7955	18.0677	17.7697	17.5298	15.7484	15.9348	18.4315	16.8456		17.5101	17.3565	17.0731	18.0579	18.4351	18.9189	17.3398	17.938	18.5441	16.5917	16.7583	17.5688
ENSMUSG00000104052	1.17703	1.25614	1.35298	1.54132	1.30132	1.37203	1.50182	1.67274	1.59871	1.62846	1.73242	1.67537		1.70216	1.78628	1.48035	1.6914	1.55428	1.81734	1.7461	2.1117	1.87067	1.85048	1.85626	1.63108
ENSMUSG00000103131	0	0	0	0	0	0	0	0	0	0	0	0.0832165		0.0780437	0	0	0	0	0	0	0	0	0	0	0
ENSMUSG00000041040	5.26978	6.3017	5.59427	6.74972	6.48981	5.6336	6.15481	6.26503	6.41252	6.94496	8.36624	7.09454		5.75045	6.06073	5.40472	5.8252	7.00754	5.96965	6.86743	7.67172	6.86987	7.21076	7.01223	6.05237
ENSMUSG00000103696	1.37814	1.60503	1.70804	1.53778	1.1681	1.00366	1.55422	1.29918	1.67426	1.62314	1.97985	1.82823		1.62106	1.55416	1.57351	1.30047	1.1151	1.33443	1.55832	1.69295	1.39664	1.4953	1.36902	1.28594
ENSMUSG00000100901	0	0	0	0	0	0	0	0	0	0	0	0		0	0	0	0	0	0	0	0	0	0	0	0
ENSMUSG00000026018	0.117745	0.110868	0.0807883	0.103648	0.182425	0.229748	0.0385604	0.0104245	0.0528971	0.146118	0.166805	0.10082		0.115565	0.116784	0.0427072	0.119527	0.149653	0.111582	0.0528687	0.0689235	0.06671	0.0359945	0.0240713	0.0460214
ENSMUSG00000026019	1.10338	1.06566	1.13107	2.03895	2.15506	2.00285	1.42956	1.69066	1.37452	1.23372	1.26046	1.37012		1.41203	1.19862	1.03799	2.63732	2.37345	2.28593	1.37378	1.76008	1.68861	2.10176	1.96274	2.12883
ENSMUSG00000026017	1.45852	1.4166	1.50481	1.1614	1.15164	1.11653	1.6103	1.59175	1.46748	1.50119	1.89847	1.59096		1.32972	1.32422	1.261	0.820921	0.987451	1.04503	1.57951	2.0076	1.65268	1.52742	1.61633	1.61285
ENSMUSG00000082609	0.121934	0.12525	0.376481	0.234186	0.357944	0.118961	0.35939	0.25909	0.788818	0.279353	0.138191	0.278418		0	0	0	0	0.123982	0.252114	0	0	0.276333	0.1491	0.448698	0.142976
ENSMUSG00000073664	12.5984	13.8654	13.1468	9.79496	9.65716	11.2041	10.2771	10.2731	9.9018	10.6893	12.2551	11.3813		12.3436	12.8658	12.454	9.80842	10.2641	10.711	10.5018	11.1517	10.9192	9.93271	10.5916	11.0392
ENSMUSG00000100516	0	0	0	0	0	0	0	0	0	0	0	0		0	0	0	0	0	0	0	0	0	0	0	0
ENSMUSG00000049439	15.7017	16.5774	15.048	19.4495	19.1662	18.9299	15.0199	15.0453	12.3192	13.9309	13.0533	13.5693		13.8335	14.5516	13.9585	21.0035	21.7859	20.1541	12.9319	9.63525	11.6442	11.8629	13.5073	13.8017
ENSMUSG00000103822	0.596071	0.357164	0.76684	0.763208	0.534661	1.16307	1.02484	0.686049	0.749799	1.02421	0.450363	0.793939		0.531848	0.591206	1.02695	0.453818	0.505068	0.564873	0.909981	0.930445	0.619138	0.546653	0.67022	0.640689
ENSMUSG00000026782	10.3655	10.3125	11.0354	8.84932	8.93296	9.47061	9.55529	9.76422	8.70214	9.90072	9.78847	9.97292		10.0314	11.0758	10.1009	9.36087	9.70145	10.0864	7.88208	8.36859	9.28483	9.53062	10.1716	9.709
ENSMUSG00000026014	2.86381	2.05945	3.19281	4.86501	4.36274	4.62495	4.05795	4.24379	4.13545	4.27026	3.96915	4.41109		3.48631	2.78518	2.54428	4.8383	5.30243	5.15263	5.23837	4.15414	4.61629	4.00032	3.76438	3.89312
ENSMUSG00000081562	0.921993	0.947067	0.474454	0.442694	1.12773	1.79902	1.13229	1.95908	0.745571	1.05615	0	0.526308		0.246796	0.2494	0.501622	1.16993	1.17185	1.19146	1.24195	0.269849	1.04473	0	0.848197	0.270275
ENSMUSG00000084400	0	0	0	0	0	0	0.123819	0	0	0	0	0		0	0	0	0	0	0	0	0	0	0.154106	0	0.147776
ENSMUSG00000082160	0	0	0	0	0	0	0	0	0	0	0	0		0	0	0	0	0	0	0	0	0	0	0	0
ENSMUSG00000103215	0	0	0	0	0	0	0	0	0	0	0	0		0	0	0	0	0	0	0	0	0	0	0	0
ENSMUSG00000088973	0	0	0	0	0	0	0	0	0	0	0	0		0	0	0	0	0	0	0	0	0	0	0	0
ENSMUSG00000084151	0	0	0	0	0	0	0	0	0	0	0	0		0	0	0	0	0	0	0	0	0	0	0	0
ENSMUSG00000101188	0.215737	0.265925	0.310849	0.745819	0.759971	0.841907	0.38152	0.229203	0.325652	0.247129	0.342302	0.591124		0.369586	0.186743	0.281699	0.832207	0.745825	0.624489	0.371973	0.252568	0.488915	0.474843	0.740954	0.505933
ENSMUSG00000026012	0	0	0	0.0164871	0.00839998	0	0.0590374	0.091202	0.0277671	0.00983349	0.0291868	0.068604		0	0.00928834	0	0	0.00872854	0.00887463	0.0555044	0.0200999	0	0	0	0.0201315
ENSMUSG00000086795	0	0	0	0	0	0	0	0	0	0	0	0		0	0	0	0	0	0	0	0	0	0	0	0
ENSMUSG00000085965	0	0	0	0	0	0	0.133073	0	0	0	0	0		0.145025	0	0	0	0	0	0.145961	0	0	0	0	0
ENSMUSG00000104069	0	0	0	0	0	0	0	0	0	0	0	0		0	0	0	0	0	0	0	0	0	0	0	0
ENSMUSG00000083118	0	0	0	0	0	0	0	0	0	0	0	0		0	0	0	0	0	0	0	0	0	0	0	0
ENSMUSG00000083355	0	0	0.0708883	0.132286	0	0	0	0	0	0	0	0.0786357		0	0	0	0	0	0	0	0	0	0.084223	0.0844862	0
ENSMUSG00000102549	0	0	0	0	0	0.0365968	0.036854	0	0	0	0	0		0	0	0	0	0.0762829	0	0	0	0	0	0	0
ENSMUSG00000026011	0	0	0	0	0	0	0	0	0	0	0	0		0	0	0	0	0	0	0	0	0	0	0	0
ENSMUSG00000081382	0	0	0	0	0	0	0	0	0	0	0	0		0	0	0	0	0	0	0	0	0	0	0	0
ENSMUSG00000080800	0	0	0	0	0	0	0	0	0	0	0	0		0	0	0	0	0	0	0	0	0	0	0	0
ENSMUSG00000026009	0	0	0	0	0.0149926	0	0	0	0.0165199	0.0175512	0.0173646	0.0524773		0	0	0	0	0	0.0158398	0	0	0	0	0	0
ENSMUSG00000102561	0	0	0	0	0	0	0	0	0	0	0	0		0	0	0	0	0	0	0	0.0495176	0	0.02586	0	0
ENSMUSG00000082804	0	0	0	0	0	0	0	0	0	0	0	0		0	0	0	0	0	0	0	0	0	0	0	0
ENSMUSG00000082661	0	0	0	0	0	0	0	0	0	0	0	0		0	0	0	0	0	0	0	0	0	0	0	0
ENSMUSG00000080785	0	0	0	0	0	0	0	0	0	0	0	0		0	0	0	0	0	0	0	0	0	0	0	0
ENSMUSG00000100893	0	0	0	0	0	0	0	0	0	0	0	0		0	0	0	0	0	0	0	0	0	0	0	0
ENSMUSG00000085248	0	0	0	0	0	0	0	0	0	0	0	0.0535706		0	0	0	0	0	0	0	0	0	0	0	0
ENSMUSG00000085447	0.0589166	0	0	0	0	0.0574799	0.0578839	0	0	0	0	0.0672635		0.0630824	0.063748	0	0.0598081	0	0	0	0.068975	0	0	0	0
ENSMUSG00000086408	0	0	0	0	0	0	0	0	0	0	0	0		0	0	0	0	0	0	0	0	0	0	0	0
ENSMUSG00000089546	0	0	0	0	0	0	0	0	0	0	0	0		0	0	0	0	0	0	0	0	0	0	0	0
ENSMUSG00000100965	0	0	0	0	0	0	0	0	0.111983	0	0	0		0	0	0	0	0	0	0	0	0	0	0	0
ENSMUSG00000102168	0	0	0	0	0	0	0	0	0	0	0	0		0	0	0	0	0	0	0	0	0	0	0	0
ENSMUSG00000100381	0	0	0	0	0	0	0	0	0	0	0	0		0	0	0	0	0	0	0	0	0	0	0	0
ENSMUSG00000086009	0	0	0	0	0	0	0	0	0	0	0	0		0	0.0668193	0	0	0	0	0	0	0	0	0	0
ENSMUSG00000052062	4.47902	4.1822	4.55221	3.42638	3.06523	3.72661	4.72633	4.61426	4.16586	5.00718	5.28903	4.53882		5.00535	4.93711	4.82591	3.35027	3.66858	3.89521	5.11087	5.37467	4.88514	4.9346	4.79319	4.91463
ENSMUSG00000103656	1.76715	1.69683	1.81874	1.54943	1.31569	1.63036	2.01925	2.26519	2.0089	1.60623	2.54699	1.97365		2.324	2.34852	2.42451	1.38442	1.36715	1.98576	2.04922	2.49611	2.45948	1.62065	1.83776	1.77931
ENSMUSG00000104402	0.936908	1.22972	1.14283	0.666453	0.645143	1.06641	1.21027	1.52995	1.40302	1.39123	1.21913	0.930986		1.13319	1.16392	1.39706	0.863022	0.652736	1.18383	1.14051	1.6656	1.55313	1.44266	1.38333	1.72926
ENSMUSG00000104081	1.07802	1.02824	1.30762	0.850362	0.941844	0.75124	0.945649	1.34983	0.830233	1.19078	1.35266	1.31866		1.03058	1.41637	1.2987	0.820752	0.939537	1.11447	1.49362	1.7128	1.6578	0.988648	1.41677	1.89608
ENSMUSG00000085842	0	0.0272091	0.054524	0	0	0	0.0260244	0	0.0285602	0	0	0		0	0	0.028823	0	0	0	0	0.0310109	0	0	0.0324914	0
ENSMUSG00000103002	2.6848	3.814	3.11593	2.13937	1.73279	2.7308	3.36733	2.67031	3.20271	3.59895	4.20808	2.8043		2.9358	2.96678	4.78613	2.26153	2.78797	2.30314	3.32411	3.07628	2.45967	3.77191	3.36329	3.08113
ENSMUSG00000100344	0	0	0	0	0	0	0	0	0	0	0	0		0	0	0	0	0	0	0	0	0	0	0	0
ENSMUSG00000101509	0	0	0	0	0	0	0	0	0	0	0	0		0	0	0	0	0	0	0	0	0	0	0	0
ENSMUSG00000085019	0.0682514	0	0	0	0	0	0	0.145023	0	0.0781826	0	0		0	0	0.0742661	0	0.0693976	0	0	0	0	0.166915	0	0
ENSMUSG00000102359	0.688749	0.600286	0.558492	0.400851	0.428879	0.590505	0.656171	0.665217	0.652597	0.645519	0.804232	0.73867		0.625714	0.541985	0.794865	0.529675	0.424433	0.560998	0.787194	0.757465	0.993285	0.714591	0.640022	0.587348
ENSMUSG00000085400	1.34128	1.87875	1.88241	0.468372	0.656232	1.24909	0	0	0.13147	0.41903	0.414574	0.556836		0.652779	1.71513	1.06144	0.309448	0.805882	0.693313	0.0656995	0.142751	0	0.2982	0	0.0714879
ENSMUSG00000100750	0	0	0	0	0	0	0	0	0	0	0	0		0	0	0	0	0	0	0	0	0	0.0442577	0	0
ENSMUSG00000081950	0.65692	0.899714	0.901463	0	0	0.213634	0.215135	0	0	0	0.496337	0.249996		0	0.47386	0.953081	0	0	0	0	0	0	0	0	0
ENSMUSG00000084333	0	0.0614839	0	0.0574796	0.0585703	0	0	0	0	0.0685656	0.0678365	0		0.0640883	0	0	0.0607618	0	0.0618799	0.0645022	0.0700748	0.0678244	0.0731915	0	0.0701852
ENSMUSG00000025969	13.4202	13.7122	15.2873	12.2226	13.4576	13.5303	16.7603	16.3843	14.2783	17.3708	18.8308	15.4279		17.0063	15.9085	17.4278	11.6681	13.2936	13.3051	9.33999	8.25053	10.4144	9.00278	8.17627	8.84114
ENSMUSG00000100811	8.17341	8.69028	8.92854	1.03275	0.631408	1.32902	2.95848	3.27538	2.3191	5.00988	2.03139	2.78304		8.06044	6.51639	9.9859	1.01894	1.96832	1.18593	0.309048	0.839368	0.568688	0.70136	0.175888	0.588483
ENSMUSG00000103032	1.97384	1.77408	2.51817	1.2834	1.12668	1.36405	2.56546	2.20627	2.28338	2.35527	2.21371	2.08917		2.20147	1.95773	2.57287	1.12709	1.33799	0.977779	1.32941	0.938772	1.44448	0.804534	0.933149	0.96436
ENSMUSG00000100426	0.0603371	0.061978	0	0	0	0.0588658	0.0592795	0	0.0650556	0.0691167	0.0683817	0.275541		0	0	0	0	0	0	0.0650206	0	0.205108	0.0737797	0.0740103	0.141499
ENSMUSG00000040865	7.90396	8.35663	8.54387	8.04032	8.1174	8.13673	10.3306	10.5502	9.6545	10.0465	9.89256	9.55216		9.18712	9.31295	9.38823	9.07168	9.09256	9.46559	10.017	11.3062	11.2793	11.8526	11.8023	10.3881
ENSMUSG00000104991	0	0	0	0	0	0	0	0	0	0	0	0		0	0	0	0	0	0	0	0	0	0	0	0
ENSMUSG00000088953	0	0	0	0	0	0	0	0	0	0	0	0		0	0	0	0	0	0	0	0	0	0	0	0
ENSMUSG00000081617	0	0	0	0	0	0	0	0	0	0	0	0		0	0	0	0	0.145207	0	0	0	0	0	0	0
ENSMUSG00000081429	0	0	0	0	0	0	0	0	0	0	0	0		0	0	0	0.216865	0	0	0	0	0	0	0	0
ENSMUSG00000084799	2.64593	2.86784	2.74195	1.59462	1.80344	1.81589	2.94018	2.77231	3.97431	3.05184	2.68849	3.10412		2.40318	2.64572	2.72025	1.88944	2.04096	2.47128	3.22493	3.71718	3.03952	3.77094	3.11123	3.20951
ENSMUSG00000101599	5.0499	5.65376	5.54233	3.48908	3.63465	3.51836	6.30532	6.37034	5.40984	6.06961	5.71094	5.86411		5.99166	6.17188	6.08325	3.49622	4.06269	4.14186	5.01073	6.38677	5.88146	7.08073	6.75137	5.96573
ENSMUSG00000025968	10.9189	9.03274	10.0202	10.1796	10.7797	9.37178	9.79522	9.92249	11.0089	10.155	9.36939	10.6108		11.0785	9.36	9.31394	10.1736	10.2431	10.045	9.3361	9.98289	10.2073	10.117	9.6543	10.4635
ENSMUSG00000077884	0	0	0.607728	0	0	0	0	0	0.636667	0	0.669219	0		0	0	0.642527	0	0	0	0.636325	0	0.669099	0	0	0.692389
ENSMUSG00000025967	26.2768	25.2432	23.0706	48.7729	44.5193	37.7453	38.7855	37.9062	33.725	32.8345	34.5084	36.4923		24.4235	24.9507	24.0529	47.8707	47.8224	42.958	47.6862	48.4284	48.8017	50.963	49.722	49.0158
ENSMUSG00000098850	0	0	0	0	0	0	0	0	0	0	0	0		0	0	0	0	0	0	0	0	0	0	0	0
ENSMUSG00000064612	0	3.46044	0.693433	4.5291	3.29645	4.60134	0.661954	2.14746	0.726454	1.54361	2.29079	1.53844		0	1.45803	0.73314	0	3.42539	2.78618	0.726064	2.36637	0	0	5.78514	6.32027
ENSMUSG00000105060	0	0	0	0	0	0	0	0	0	0	0	0		0	0	0	0	0	0	0	0	0	0	0	0
ENSMUSG00000064602	0.796267	0.817922	1.22927	2.29396	5.45413	0.77685	1.17346	1.69193	1.2878	2.28033	1.80486	0.909077		1.70514	2.58469	1.29966	5.25405	3.64337	3.29276	0.429038	3.72883	0.451135	3.40784	4.88356	2.80103
ENSMUSG00000046856	0.231606	0.173022	0.433396	0.586357	0.494468	0.205417	0.206861	0.156585	0.249718	0.289426	0.262486	0.192305		0.338158	0.182254	0.229106	0.384727	0.406766	0.282971	0.612616	0.369746	0.167007	0.180222	0.361571	0.617214
ENSMUSG00000094290	0	0	0	0	0	0	0	0	0	0	0	0		0	0	0	0	0	0	0	0	0	0	0	0
ENSMUSG00000086730	0	0	0	0	0	0	0	0	0	0	0	0		0.0617668	0	0	0	0	0	0	0	0	0	0	0
ENSMUSG00000102536	0	0	0	0	0	0	0	0	0	0	0	0		0	0	0	0	0	0	0	0	0	0	0	0
ENSMUSG00000087561	0	0	0	0	0	0	0	0	0	0	0	0		0	0	0	0	0	0	0	0	0	0	0	0
ENSMUSG00000092705	0	0	0	0	0	0	0	0	0	0	0	0		0	0	0	0	0	0	0	0	0	0	0	0
ENSMUSG00000027520	0.136999	0.13646	0.213634	0.322919	0.227489	0.858653	0.142755	0.119086	0.152189	0.0475556	0.0282299	0.0284378		0.346712	0.23358	0.343317	1.08308	1.60406	1.58369	0.331056	0.20899	0.286953	0.218285	0.183322	0.150905
ENSMUSG00000094214	0	0	0	0	0	0	0	0	0	0	0	0		0	0	0	0	0	0	0	0	0	0	0	0
ENSMUSG00000083039	0	0	0	0	0	0	0	0	0	0	0	0		0	0	0	0	0	0	0	0	0	0	0	0
ENSMUSG00000081643	0	0	0.0837272	0.234367	0	0	0	0	0	0	0	0.0928778		0.0871045	0	0.0885215	0.0825834	0.165437	0.084103	0.175334	0	0.184365	0	0.0997879	0.095391
ENSMUSG00000025964	3.07568	2.49309	2.73052	1.25696	1.36696	1.23978	12.8713	11.1499	8.27785	6.7943	5.2253	5.57204		7.45673	7.27184	6.64554	3.00305	3.6197	4.78468	12.0591	21.7008	18.6461	31.5264	27.9818	25.6408
ENSMUSG00000087823	0	0	0	0	0	0	0	0	0	0	0	0		0	0	0	0	0	0	0	0	0	0	0.625854	0
ENSMUSG00000115378	0	0	0	0	0	0	0	0.0505284	0	0	0	0		0	0	0	0	0	0	0	0	0.0538912	0	0	0
ENSMUSG00000069085	0	0	0	0	0	0	0	0	0	0	0	0		0	0	0	0	0	0	0	0	0	0	0	0
ENSMUSG00000083066	0	0	0	0.100133	0	0	0	0	0	0	0	0		0	0	0	0	0	0	0	0	0	0	0	0
ENSMUSG00000025963	0.0917166	0	0	0.0293584	0	0.0298267	0	0	0.032963	0	0	0		0.0327339	0.0330793	0.0997991	0.0620696	0.0621712	0.0316059	0.0329453	0.0715831	0	0	0	0
ENSMUSG00000025962	3.21245	2.97811	3.09441	3.79814	4.37806	3.57063	3.5166	3.6031	2.88479	2.99312	2.81931	2.9831		2.92222	2.96274	2.59002	4.31478	4.16716	3.96863	3.05681	3.13233	3.3562	2.80114	3.17211	3.80879
ENSMUSG00000025961	0.059788	0.0614139	0.0307667	0.0574142	0.0292518	0	0.02937	0.0317599	0	0	0.0338797	0.0341292		0.0640154	0	0.130114	0.121385	0	0	0.0322144	0.0349975	0	0	0	0
ENSMUSG00000080817	0.209655	0	0.359626	0.201332	0.0683839	0.068181	0.274641	0.148494	0.0753503	0.160108	0.316811	0.159572		0.149653	0.075616	0.0760437	0	0.0710587	0.144496	0.15062	0.245448	0.158377	0.085455	0	0
ENSMUSG00000082373	0	0	0	0	0	0.0513749	0	0	0	0	0	0		0	0	0	0	0	0	0	0	0	0	0	0
ENSMUSG00000044689	2.53226	2.52573	2.49287	1.72688	2.51378	2.47051	1.00957	0.701822	0.553972	1.17711	2.28759	1.00557		2.43625	1.70749	2.43595	2.16078	1.71652	1.47967	0.988704	0.902262	1.33072	0.762888	1.03537	0.602456
ENSMUSG00000025959	10.4254	12.2293	12.0069	12.8107	12.8704	12.889	11.2079	10.4925	10.6553	10.854	14.3059	9.03196		12.4843	11.7139	12.1107	13.247	14.1099	13.0698	9.47946	10.3665	9.43305	9.98983	9.29167	8.38965
ENSMUSG00000097272	0.0164436	0.0168907	0	0.0315814	0	0	0	0	0	0	0	0		0.0352125	0.017792	0	0	0.0334394	0	0.0177199	0	0	0	0.0201699	0
ENSMUSG00000098487	0	0	0	0	0	0.801127	0	0	0	0	0	0		0.879211	0	0	0.833576	0.83494	0.848914	0	0	0	0	1.00723	0
ENSMUSG00000086836	0	0	0	0.801065	0.136044	0	0.136594	0	0	0	0.157567	0		0.148861	0	0.151283	0.282269	0.282731	0.143732	0	0.162766	0	0	0	0
ENSMUSG00000086721	0.113019	0.348276	0.116318	0.217063	0	0.330788	0	0	0	0	0.128087	0.12903		0.242019	0.122287	0	0	0	0.23368	0	0.264627	0	0.414594	0.13863	0.132522
ENSMUSG00000101895	0	0	0	0.235095	0.239556	0	0	0	0	0	0	0		0	0	0	0.16568	0.0414877	0	0	0	0.0924686	0	0	0.0478436
ENSMUSG00000093228	0	0	0	0	0	0	0	0	0	0	0	0		0	0	0	0	0	0	0	0	0	0	0	0
ENSMUSG00000099658	0	0	0	0	0	0	0	0	0	0	0	0		0	0	0	0	0	0	0	0	0	0	0	0
ENSMUSG00000025958	6.80344	6.53278	7.5334	7.26782	6.66852	6.29055	9.32555	8.73547	7.7973	8.15701	9.13214	9.53558		7.67758	8.17238	7.96893	8.20304	7.99481	8.13258	9.09128	9.08871	9.22584	10.1663	9.98233	11.0627
ENSMUSG00000025956	3.51523	3.8803	4.03184	4.28257	4.03868	3.39539	4.48455	4.10625	4.26154	4.7279	4.67763	4.31275		3.65143	3.74673	3.40635	3.26662	3.89435	3.81489	4.61733	4.68865	4.5777	3.84931	4.462	5.27022
ENSMUSG00000101832	0.513219	0.21087	0.10564	0.295706	0.200878	0.500704	0.201689	0.981454	0.774695	1.05821	0.348987	0.351557		0.219803	0.222122	0.670135	0.416788	0.313102	0.212229	0.331834	1.20167	0.697849	0.376536	0.755425	0.72214
ENSMUSG00000100437	0.161703	0	0	0.310567	0.15823	0.15776	0.158869	0.343593	0.174349	0.740931	0.549789	0.553838		0.692548	0.174964	0.351907	0.16415	0.164419	0.334342	0.697021	0.18931	0.54969	0.395459	0.396695	0
ENSMUSG00000087213	0	0	0.0693137	0.62518	0.72491	0.48184	0.220557	0.190803	0.145229	0.102863	0.101769	0.0512594		0.0721096	0.121451	0.0732826	0.455778	0.84457	0.742664	0.314493	0.236536	0.152627	0.219606	0.220292	0.263232
ENSMUSG00000070871	2.05288	1.82754	1.90935	3.09578	3.21404	2.89296	2.31569	1.97099	2.67249	1.96837	1.58552	2.25691		2.11662	1.76052	1.88631	2.5316	2.9996	3.22273	2.26139	2.15411	2.5157	2.13835	2.70461	2.46062
ENSMUSG00000045005	0.828394	0.749436	0.782181	1.18961	1.36835	1.49034	1.47095	1.70368	1.45858	1.03599	1.08527	1.00649		1.29383	1.06079	0.909666	1.41184	1.48369	1.54781	1.30219	1.57484	1.4037	1.64489	1.45426	1.12284
ENSMUSG00000102140	0.024063	0	0.0123827	0	0.0235461	0.0234762	0	0	0	0	0	0.0137361		0.0128822	0	0	0.0244271	0.0122336	0	0	0	0.0272664	0	0	0.0141077
ENSMUSG00000051344	4.0374	4.29055	4.06117	6.57584	6.11672	3.99529	6.91206	6.86612	5.74884	6.66446	6.69176	6.66412		4.99784	4.94644	4.91682	5.61773	5.88135	5.80069	7.14589	8.20831	7.25765	7.50833	8.14567	6.8783
ENSMUSG00000097264	0	0	0.142712	0	0	0	0	0	0	0	0	0		0	0	0	0	0	0	0	0	0	0	0	0
ENSMUSG00000084416	1.84822	1.32068	0.992437	3.85834	2.90935	2.11674	2.7632	1.53671	1.73283	1.841	0.91071	1.1009		1.20455	1.3042	0.524632	2.77349	3.18656	2.74145	1.81849	1.69337	2.36742	2.4565	2.06991	1.41336
ENSMUSG00000077471	0	0	0	0	0	0	0	0	0	0	0	0		0	0	0	0	0	0	0	0	0	0	0	0
ENSMUSG00000025955	0	0	0	0	0	0	0	0	0	0	0	0		0	0	0	0	0	0	0	0	0	0	0	0
ENSMUSG00000090042	0	0	0	0	0	0	0	0	0	0	0.0912105	0		0	0	0	0	0	0	0	0	0	0	0	0
ENSMUSG00000070870	0	0	0	0	0	0.0709158	0.0714142	0	0	0	0	0		0	0	0	0	0	0	0	0	0	0	0	0
ENSMUSG00000067299	0	0.0525125	0	0	0	0	0	0	0	0	0	0		0	0	0	0.0518958	0	0	0	0	0	0	0	0
ENSMUSG00000025952	0	0	0	0	0	0	0	0	0	0	0	0		0	0	0	0	0	0	0	0	0	0	0	0
ENSMUSG00000073658	0	0	0.085312	0	0	0	0	0	0	0	0	0		0	0	0	0	0	0	0.0893264	0	0	0	0	0
ENSMUSG00000100774	0	0.257061	0	0	0	0	0	0.265875	0	0	0	0		0.26795	0	0.272309	0	0	0	0	0.292979	0	0	0	0
ENSMUSG00000044429	0	0.0739491	0	0	0.0704448	0	0	0	0	0	0	0		0	0	0	0	0	0	0	0	0	0	0	0
ENSMUSG00000100846	0	0	0	0	0	0	0	0	0	0	0	0		0	0	0	0	0	0	0	0	0	0	0	0
ENSMUSG00000044816	0	0.020241	0	0	0.0192818	0.0192246	0.0193597	0	0	0	0	0		0	0	0	0.0200033	0.10018	0.0203714	0	0	0	0	0.0241706	0.0231056
ENSMUSG00000025950	38.3674	33.6443	36.6376	32.9466	31.2891	20.8345	43.8251	35.9464	29.3848	33.4134	37.9588	39.4942		39.3745	27.7236	30.6252	28.436	25.1657	21.5283	33.9062	28.487	29.7427	24.8607	28.2185	29.7995
ENSMUSG00000025949	7.00861	6.55291	7.16816	8.04385	7.81904	7.10726	8.69992	8.43713	7.44461	8.05976	7.59891	8.46689		7.24641	6.81672	6.86421	7.61452	7.48234	7.85079	7.56148	7.46532	7.80523	7.54648	7.67408	7.9871
ENSMUSG00000025946	0.0203538	0.0627221	0.0837921	0.0390915	0.0199166	0.0794301	0.0599912	0	0	0	0	0.0232374		0.065379	0.0220229	0.044295	0.165295	0.103478	0.147294	0.17547	0.214458	0.230634	0.149331	0.349528	0.38186
ENSMUSG00000100503	0	0	0	0	0	0	0	0	0	0	0	0		0	0	0	0	0	0	0	0	0	0	0	0
ENSMUSG00000100504	0.0772847	0	0	0	0	0	0	0	0	0	0	0		0	0	0	0	0	0	0	0.0904789	0	0	0	0
ENSMUSG00000099383	0	0	0	0	0	0	0	0	0	0	0	0		0	0	0	0	0	0	0	0	0	0	0	0
ENSMUSG00000100340	0	0	0	0	0	0	0	0	0	0	0	0		0	0	0	0	0	0	0	0	0	0	0	0
ENSMUSG00000100439	0	0	0	0	0	0	0	0	0	0	0	0		0	0	0	0.173211	0	0	0	0	0	0	0	0
ENSMUSG00000099819	0	0	0	0	0.126975	0	0	0	0.13991	0	0	0		0	0	0	0	0	0	0	0.151915	0	0	0	0
ENSMUSG00000082565	0	0	0	0	0	0	0	0	0	0	0	0		0	0	0	0	0	0	0	0	0	0	0	0
ENSMUSG00000082774	0.671612	0.344938	0.691218	0.644947	0	0.655235	0.32992	0.713532	0.181033	0.192334	0.951445	0.575071		0.539324	0.545015	0.548098	0.170444	0.512168	0.69432	0.180936	0.786271	0.38051	0.410621	0.205952	0.196877
ENSMUSG00000025945	0	0	0	0	0	0	0	0	0	0	0	0		0	0	0	0	0	0	0	0	0	0	0	0
ENSMUSG00000081623	0	0	0	0	0	0	0	0	0	0	0	0		0	0	0	0	0	0	0	0	0	0	0	0
ENSMUSG00000083242	0	0.158307	0	0	0	0	0	0	0	0	0	0		0	0.166754	0	0	0.156704	0	0	0	0	0	0.189041	0.180711
ENSMUSG00000083289	0.127557	0.262053	0	0.367479	0	0	0	0	0	0.292236	0.433693	0		0.273153	0.414053	0.277597	0	0.129699	0	0	0	0	0	0	0
ENSMUSG00000015222	0.862635	0.61042	0.71683	0.269992	0.372031	0.370927	1.16455	1.04886	0.58217	0.596553	0.470719	0.507014		0.827845	0.556568	0.531904	0.405411	0.519775	0.54499	0.671374	0.819145	0.608205	0.496157	0.348787	0.340912
ENSMUSG00000088850	0	0	0	0	0.375363	0	0.753758	0.407546	0.827203	0.439421	0	0.437949		0	0	0	0.389408	0.390045	0	0	0	0	0	0	0
ENSMUSG00000073656	0	0	0	0	0	0	0	0	0	0	0	0		0	0	0	0	0	0	0	0.0370413	0	0	0	0
ENSMUSG00000065694	0	0.357502	0.358197	0	0.340561	0	0.341937	0	0	0	0	0.397345		0	0	0	0	0	0	0	0	0	0	0	0
ENSMUSG00000055567	0.163945	0.108527	0.0524942	0.0139943	0.0499096	0.0142176	0.0107381	0.0116119	0.027497	0.00834671	0.00412897	0.00831876		0.0507108	0.0354779	0.0237857	0.00739672	0	0.0225985	0.00392603	0.00426521	0.00825647	0.0178197	0.00893767	0
ENSMUSG00000103375	0	0.0312582	0	0	0	0	0.0298972	0	0	0	0	0.0347418		0.0651645	0.032926	0	0	0	0	0.0327927	0.0356258	0	0	0	0
ENSMUSG00000026005	9.50456	7.19655	8.75691	8.72191	8.93696	7.67517	10.2668	10.4027	8.13638	9.18577	9.39421	9.63686		9.52587	6.32017	8.37658	9.40845	8.42825	9.21507	9.66017	8.00446	9.60295	9.97064	10.2917	10.1946
ENSMUSG00000026004	8.46978	8.19787	8.08395	4.4757	4.09762	4.51632	6.01242	6.49328	5.17827	6.58557	6.60492	6.55452		7.99628	8.20012	7.80886	5.33969	5.22013	5.24227	6.48424	7.4322	6.97011	6.84666	6.39406	7.24972
ENSMUSG00000102559	1.3536	1.02543	1.41053	0.666179	0.728489	0.825372	1.36312	1.11452	1.27702	1.5118	1.36149	1.37152		1.30438	1.08015	1.62018	0.893155	0.946229	0.734669	1.38574	1.78278	1.7447	1.53104	1.39054	1.17055
ENSMUSG00000102374	2.54917	2.51375	2.35073	1.33169	1.09754	1.13407	2.20395	2.75161	1.36326	2.94345	2.79659	2.35154		2.18353	2.66995	2.50753	1.24212	1.32709	1.79204	2.65913	2.60237	2.63433	2.31912	2.17628	2.36734
ENSMUSG00000102776	0.720226	0.892472	0.894208	0.95511	0.917299	0.858811	0.876078	0.971657	0.530025	0.641686	0.790339	0.926677		0.893556	0.68033	0.709058	1.10249	0.953179	1.00459	0.739173	0.843184	0.971554	0.684978	0.560913	0.831107
ENSMUSG00000082057	0.657404	0.635559	0.915393	0.74271	0.416241	0.52819	0.949824	0.369761	0.333559	0.753062	0.482094	0.79469		0.496861	0.460262	0.673258	0.588839	0.471842	0.599675	0.66676	0.769637	0.613464	0.331004	0.426907	0.408097
ENSMUSG00000103706	3.78212	1.8713	1.85456	1.36912	0	0	2.84037	3.17668	1.17426	3.08489	1.84023	2.28331		3.90113	1.97114	1.96075	1.96993	1.30872	1.65817	3.13679	3.54688	1.66039	3.58357	1.70023	2.02003
ENSMUSG00000103756	4.42945	4.17075	3.46656	3.14589	2.3929	3.42114	3.49052	4.50985	3.83062	3.43551	3.45126	4.16148		3.75459	3.99391	3.66505	2.85714	3.19022	2.71891	3.57996	5.07762	4.02575	4.2879	3.28257	3.57076
ENSMUSG00000103382	0.144709	0.0495483	0.297868	0.185285	0.330402	0.188241	0.118477	0.128118	0.130022	0.110511	0.136669	0.110141		0.129118	0.182672	0.28868	0.0979327	0.171663	0.0997348	0.129952	0.141179	0.163974	0.0589831	0.0295837	0.0848407
ENSMUSG00000103553	0.504353	0.518069	0.507542	0.645772	0.482552	0.48112	0.814843	0.738259	0.616301	0.718967	0.5843	0.588603		0.816022	0.509332	0.768319	0.637137	0.558407	0.486646	0.688436	1.03658	0.927092	0.918226	0.811114	0.814801
ENSMUSG00000026003	20.2613	12.7351	17.5886	15.6813	11.9521	10.2289	20.344	20.7741	14.4979	20.9576	13.13	16.4885		22.2833	13.5564	17.3409	18.8118	16.1508	16.4211	20.9019	26.4821	19.2757	23.6215	19.9658	20.3462
ENSMUSG00000082769	0.95552	0.436225	0.218537	0.509769	0.103888	0	0.625848	0.563978	0.915772	0.729705	0.601621	0.969682		1.47779	0.459501	0.577625	0.754428	0.107952	0.987828	1.60174	1.24294	0.601513	0.908757	0.390685	0.62245
ENSMUSG00000089420	0	0	0	0	0	0	0	0	0	0	0	0		0	0	0	0	0	0	0	0	0	0	0	0
ENSMUSG00000077328	0	0	0	0	0	0	0	0	0	0	0	0		0	0	0	0	0	0	0	0	0	0	0	0
ENSMUSG00000061816	2.25519	1.24936	2.73829	3.67432	0.173565	0.395542	3.33594	0.349971	81.1155	1.59645	0.315894	0.665371		26.3713	22.7837	5.5696	0.617344	0.360707	0.733488	23.1556	0.355983	0.631676	1.08446	2.76625	0.29712
ENSMUSG00000094191	0	0	0.143089	0.133511	0.136044	0	0.136594	0	0	0	0	0		0	0.150432	0.151283	0	0	0	0	0	0	0	0.170537	0.163023
ENSMUSG00000082212	0	0	0	0	0	0	0	0	0	0	0	0		0	0	0.0413186	0	0	0	0	0	0	0	0	0.044525
ENSMUSG00000026000	5.66657	4.1138	4.38188	3.27966	2.95975	2.78661	4.62683	5.23112	3.64931	5.25429	4.13964	4.23132		4.66521	4.05988	3.72456	3.4203	3.52711	3.79197	4.34876	5.00238	4.48597	5.35596	4.78095	4.30092
ENSMUSG00000025991	0	0	0	0	0	0	0.0278843	0.0100511	0	0.0325116	0.010722	0		0	0	0	0	0	0.00978047	0	0.0110757	0	0	0	0
ENSMUSG00000086204	0	0	0	0	0	0	0	0	0	0	0	0		0	0	0	0	0	0	0	0	0	0	0	0
ENSMUSG00000077745	0	0	0	0	0	0	0	0	0	0	0	0		0	0	0	0	0	0	0	0	0	0	0	0
ENSMUSG00000082473	0	0	0	0	0	0	0	0	0	0	0	0		0	0	0	0	0	0	0	0	0	0	0	0
ENSMUSG00000095282	0	0	0	0	0	0	0	0	0	0	0	0		0	0	0	0	0	0	0	0	0	0	0	0
ENSMUSG00000085075	0	0	0	0	0	0	0	0	0	0	0	0		0	0	0	0	0	0	0	0	0	0	0	0
ENSMUSG00000104395	0	0	0	0	0	0	0	0	0	0	0	0		0	0	0	0	0	0	0	0	0	0	0	0
ENSMUSG00000096031	0	0	0	0	0	0	0	0	0	0	0	0		0	0	0	0	0	0	0	0	0	0	0	0
ENSMUSG00000087329	0	0	0	0	0	0	0	0	0	0	0	0		0	0	0	0	0	0	0	0	0	0	0	0
ENSMUSG00000062209	3.19448	3.82315	3.29211	1.13556	1.36106	1.87161	0.167163	0.144612	0.279763	0.594454	0.790604	0.786714		1.06573	1.96064	2.10596	0.328168	0.605509	0.549681	0.00458381	0.0149395	0.0192796	0.0104026	0.0260878	0.044889
ENSMUSG00000102449	0.116527	0.199493	0.119929	0.0373002	0.19004	0.0757903	0	0.0412667	0.0418798	0.0889884	0	0.0886904		0.0831774	0.084055	0.126796	0.03943	0.118484	0	0	0	0	0	0	0.0455452
ENSMUSG00000083795	0.587848	0.966136	0.484007	0.112902	0.115044	0.458811	0.115509	0.124908	0.253528	0.134677	0.26649	0		0	0.254422	0.12793	0.119349	0	0	0	0	0	0	0	0
ENSMUSG00000080539	0	0	0	0	0	0.545448	0	0	0	0	0	0		0	0	0	0	0	0	0	0	0	0	0	0
ENSMUSG00000103307	0.177803	0.182639	0.156852	0.0487841	0.0497097	0.148687	0	0.0269859	0.109547	0.058193	0.0863612	0.0289991		0	0.164901	0.138195	0	0.0774811	0.0525186	0	0	0	0	0	0
ENSMUSG00000104508	0.336403	0.153578	0.307754	0.0358941	0.146301	0.0729333	0.0734459	0.0397111	0.0806023	0.0428169	0.211808	0		0.280147	0.161773	0.122016	0.0758874	0	0	0	0	0	0.0457056	0	0
ENSMUSG00000103642	0.576781	0.979849	0.707776	0.213031	0.108537	0.259715	0.0653851	0.141411	0.0717561	0.228706	0.125708	0.126634		0.237524	0.336043	0.362082	0.0675587	0.0225564	0.0688018	0	0	0.0251371	0	0.027211	0
ENSMUSG00000103809	0.162052	0.149814	0.183462	0.0466856	0.0317143	0.0316202	0	0.0172167	0.0524176	0	0	0.0555033		0.0173511	0.0701366	0.0529	0	0	0	0	0	0	0	0	0
ENSMUSG00000087514	0.875894	0.674785	0.450732	0.21028	0.428539	0.320451	0.215135	0	0	0.125418	0.124084	0.249996		0.937825	1.18465	0.476541	0	0.333976	0	0	0	0	0	0	0
ENSMUSG00000084332	0	0	0.140124	0.130744	0.399674	0.132829	0.401288	0	0.146796	0.31192	0	0.155438		0.145776	0.441942	0	0.414628	0.138436	0	0.293435	0.159393	0.154274	0.499447	0.167003	0.319288
ENSMUSG00000101387	0	0	0	0	0	0	0	0	0	0	0	0		0	0	0	0	0	0	0	0	0	0	0	0
ENSMUSG00000099804	0	0	0	0	0	0	0	0	0	0	0	0		0	0	0	0	0	0	0	0.0203122	0	0	0	0
ENSMUSG00000100354	0.21438	0.235939	0.204878	0.147049	0.179807	0.134455	0.225666	0.22776	0.247655	0.228033	0.15619	0.297198		0.131164	0.23196	0.283258	0.108812	0.12456	0.158306	0.264023	0.215125	0.121459	0.112346	0.150263	0.161598
ENSMUSG00000101156	0	0	0	0	0	0	0	0	0	0.0240034	0	0		0	0	0	0	0	0	0	0	0	0	0	0
ENSMUSG00000025997	1.55674	1.75248	1.7978	1.06905	1.24432	1.2318	1.55613	1.5289	1.5809	1.84028	1.63095	1.74113		1.59413	1.44937	1.30984	1.19441	1.15495	1.46902	1.62881	1.93907	1.94346	1.40554	1.35443	1.38496
ENSMUSG00000100815	0.331569	0.417991	0.325737	0.217094	0.339194	0.205853	0.518249	0.32024	0.406247	0.500665	0.47826	0.705467		0.322739	0.358759	0.426386	0.413083	0.260515	0.389522	0.519717	0.476396	0.444019	0.405439	0.480653	0.388786
ENSMUSG00000099954	0.560572	0.950098	0.923098	0.5114	0.54853	0.437522	0.495671	0.863563	0.936835	0.866889	0.79414	1.02398		0.660229	0.606541	0.975955	0.540602	0.39899	0.753383	0.694698	1.24692	0.921037	0.445551	0.721985	0.788769
ENSMUSG00000103402	0	0	0	0	0	0	0	0	0	0	0	0		0	0	0	0	0	0	0	0	0	0	0	0
ENSMUSG00000053153	0.00776961	0	0	0	0	0	0	0	0	0	0	0		0	0	0	0	0	0	0	0	0	0	0.0095303	0
ENSMUSG00000089345	0	0	0	0	0	0	0	0	0	0	0	0		0	0	0	0	0	0	0	0	0	0	0	0
ENSMUSG00000080524	0	0	0	0	0	0	0	0	0	0	0	0		0	0	0	0	0	0	0	0	0	0	0	0
ENSMUSG00000101730	0.5972	0.613441	0.614634	0	1.16874	0.582638	0.586732	0.634476	0	0.684098	0	0		0	0.646173	0	0.606237	0.607229	0.617392	0	0.699155	0	0	0	0
ENSMUSG00000103052	0	0	0	0	0	0	0	0	0	0	0	0		0	0	0	0	0	0	0	0	0	0	0	0
ENSMUSG00000104287	0	0	0	0	0	0	0	0	0.00970762	0	0	0		0	0.00974186	0	0	0	0	0	0	0	0	0	0
ENSMUSG00000075952	0	0	0	0	0	0	0	0	0	0	0	0		0	0	0	0	0	0	0	0	0	0	0	0
ENSMUSG00000045648	0.0546793	0.0140416	0.00703444	0.00656355	0	0	0	0	0	0	0	0		0	0	0	0	0	0	0	0	0	0	0	0
ENSMUSG00000026196	0.417903	0.391111	0.315409	1.44472	1.53574	1.03287	1.41421	1.32209	1.24161	0.638282	0.55782	0.604338		0.517055	0.542607	0.626518	0.980435	1.67136	1.50731	1.08082	1.31553	1.24172	1.19235	0.74043	0.860255
ENSMUSG00000089965	0	0.427305	0.285424	0.266317	0.678426	0.405848	0.544933	0.736594	0.598031	0.635363	0.314303	0.633236		0.148468	0.30007	0.301767	0.281524	0.281985	1.29017	0.149427	1.78571	0.47137	0	0.170087	0.162593
ENSMUSG00000101551	0.0678111	0	0.0697907	0	0	0	0.0666225	0	0	0	0.0768522	0		0.0726058	0	0.073787	0	0.0689499	0.0701039	0	0	0	0	0	0
ENSMUSG00000050296	0.024843	0.0218731	0.018263	0.0068162	0.00347276	0.0103874	0.331245	0.554266	0.489797	0.142289	0.116643	0.129658		0.0493992	0.0268802	0.030894	0.00720541	0	0.011007	0.0229469	0.0124647	0.0201073	0.13887	0.156717	0.199749
ENSMUSG00000101617	0	0	0	0	0	0	0	0	0	0	0	0		0	0	0	0	0	0	0	0	0	0	0	0
ENSMUSG00000026192	4.79136	4.70533	4.72802	7.25564	8.70066	7.01821	4.61039	4.11849	3.80358	4.35767	4.10993	4.18528		4.19995	4.19442	4.01046	7.12209	7.4215	6.22573	4.06396	3.5829	3.70648	2.9938	3.33415	3.44963
ENSMUSG00000026193	95.8783	82.4826	93.4235	332.634	231.528	190.999	127.758	137.456	184.601	194.595	178.432	139.253		123.283	84.3775	87.0179	249.03	275.147	208.316	368.32	264.874	277.145	161.857	155.39	174.853
ENSMUSG00000073652	0.0502665	0.0774503	0.025867	0.144812	0.07378	0.0490408	0.0740781	0.13351	0.0541974	0.0287904	0.142421	0.0573879		0.107641	0.0815828	0.164089	0.178595	0.0255553	0.025983	0.216673	0.235392	0.113916	0.153664	0.154144	0.117882
ENSMUSG00000101834	0	0.307594	0	0	0	0	0	0	0	0	0	0		0	0	0	0	0	0	0	0	0	0	0	0
ENSMUSG00000100319	0	0	0	0.11509	0	0	0	0	0	0	0	0		0	0	0	0	0.0609306	0	0	0	0	0	0	0
ENSMUSG00000102689	0	0	0	0	0.0146051	0	0	0	0	0	0	0		0	0	0	0	0	0	0	0	0	0.0182511	0	0
ENSMUSG00000099707	0	0.035031	0	0.0654992	0.033371	0	0	0	0	0	0	0		0	0	0	0.0692393	0.0346763	0.0352567	0	0.0399258	0.0386436	0	0	0
ENSMUSG00000101211	0	0	0	0.0822744	0.0670684	0.0501521	0.0336697	0	0.0184752	0	0	0.0391256		0.0550403	0	0.0372904	0	0.0174229	0.0531436	0.0923263	0.0200605	0	0	0.0210182	0.0602764
ENSMUSG00000101848	0.144246	0	0.0494856	0.277038	0.188196	0.0469095	0.0472392	0.0510831	0.0518421	0.110157	0.108985	0		0.102963	0	0	0.244048	0.293337	0.198831	0.0518142	0.0562906	0.0544829	0	0	0
ENSMUSG00000101764	0	0	0	0	0	0	0	0	0	0	0	0		0	0	0	0	0	0	0	0	0	0	0	0
ENSMUSG00000059483	0	0	0	0	0.107135	0.106817	0	0	0	0.125418	0	0.124998		0	0	0	0	0	0	0.117985	0.256357	0.124062	0.133879	0	0.256761
ENSMUSG00000101496	0.527294	0.451361	0.452239	0.506359	0.171989	0.171479	0.259026	0.373471	0.0947548	0.30201	0.497997	0		0.470481	0.285267	0.0956269	0.178424	0.714865	0.72683	0.189408	0.411543	0.59749	0.644771	0.646786	0.515239
ENSMUSG00000102123	0	0	0.0264101	0.147853	0.0251097	0.0250352	0	0	0.0553353	0.0293948	0	0		0	0	0	0.0520985	0.0782756	0.0265286	0.0276528	0.0300418	0	0	0.0314761	0
ENSMUSG00000039395	0.0920379	0.0472704	0.213131	0.353535	0.360243	0.157139	0.271274	0.415576	1.01716	0.421721	0.443313	0.525386		0.34491	0.298756	0.275409	0.39708	0.374334	0.380599	0.272751	0.161626	0.182508	0.393901	0.508027	0.269801
ENSMUSG00000094655	1.37575	4.80475	5.38046	4.22761	5.38478	3.22128	4.59556	1.75394	4.74667	4.09743	8.73138	10.6805		2.35684	8.9314	4.49096	4.46901	4.7561	4.8357	4.15111	4.50974	9.35337	9.75708	12.4876	26.4558
ENSMUSG00000097131	0.246268	0.242847	0.385255	0.132435	0.0867521	0.144158	0.261308	0.251174	0.169937	0.383659	0.357251	0.382375		0.369153	0.437	0.418034	0.0999978	0.220355	0.152757	0.191077	0.403636	0.401835	0.385452	0.507487	0.508228
ENSMUSG00000094050	0.27515	0	0.566364	0.528451	0	0.26844	0.810981	0.292324	0	0.315187	0.935505	0.942394		0	0	0.299397	0.83794	0.27977	0.568906	0.593015	0	0.311779	0	0	0.645263
ENSMUSG00000093956	0.5503	0.847898	0.849546	0.792677	1.07696	0.536881	0.540654	0.584648	0.296667	0.315187	0.935505	1.25653		0.294605	0.297713	1.49699	1.95519	1.39885	0.568906	1.18603	0.322124	1.55889	0	3.03752	1.29053
ENSMUSG00000093843	0.825449	0.847898	0.566364	0.528451	1.61544	1.3422	1.08131	1.46162	0.593334	1.26075	0.311835	2.51305		1.76763	0.297713	0	1.39657	0.839311	1.99117	2.37206	1.2885	1.24712	2.01871	0.675005	1.93579
ENSMUSG00000026189	2.46128	1.74483	2.24771	2.43014	2.91723	1.45429	2.11162	1.95197	2.13048	1.9458	2.47514	1.89971		2.5982	2.40056	3.244	2.32258	2.00914	1.75607	1.53163	1.74512	2.43541	1.82274	1.91348	1.95111
ENSMUSG00000026188	0.189289	0.0707044	0.141684	0.115674	0.0505154	0.100731	0.101439	0.0548466	0.0927692	0.0394241	0.0780098	0.0982303		0.147399	0.130335	0.20597	0.174685	0.12248	0.0889498	0.148351	0.0201459	0.0779958	0.21042	0.105539	0.141244
ENSMUSG00000026187	9.25602	8.17666	7.748	9.52061	10.3856	11.2779	13.7619	11.1886	11.9536	9.66037	10.3735	10.2621		8.47897	8.56843	8.07974	11.1291	12.1094	12.4609	14.0973	17.2898	18.4127	17.6061	18.5441	18.6677
ENSMUSG00000039372	0.0346279	0.0237131	0.0118796	0	0.033884	0.0337835	0.385571	0.465997	0.522702	0.396666	0.170061	0.184491		0.160664	0.487078	0.138158	0.667886	0.833289	0.990431	1.82847	4.0945	3.92377	6.42198	6.96591	3.95208
ENSMUSG00000085812	0	0	0	0.095401	0	0	0	0	0.107114	0	0.337772	0		0.212739	0	0	0	0	0	0	0	0	0	0	0
ENSMUSG00000039354	5.00948	4.42946	5.13683	4.64319	4.56969	4.53823	6.31884	6.19943	5.51993	6.21134	5.38623	5.36305		5.65839	5.82729	5.34112	5.27155	4.99098	5.24525	6.75285	7.9485	8.67048	9.73805	8.92443	8.43438
ENSMUSG00000110712	0	0	0	0	0	0.0399938	0.0402749	0	0.176797	0	0	0		0.087784	0	0	0	0	0.0423795	0.0441755	0	0.0929014	0	0.150849	0
ENSMUSG00000039342	0	0	0	0	0	0	0	0	0	0	0	0		0	0	0	0	0.0116469	0	0	0	0	0	0.0281007	0
ENSMUSG00000110487	0	0	0	0	0	0	0	0	0	0	0	0		0	0	0	0	0	0	0	0	0	0	0	0
ENSMUSG00000110596	0	0	0	0	0	0	0	0	0	0	0	0		0	0	0	0	0	0	0	0	0	0	0	0
ENSMUSG00000046330	5.96353	6.66171	5.60058	9.44916	9.11785	7.63627	9.3744	7.40491	7.51493	5.55041	6.63191	7.27648		6.34529	6.17027	5.55626	10.1022	10.4598	8.86242	9.03717	8.55251	9.50263	8.97847	9.1894	10.2267
ENSMUSG00000039323	0.199174	0.175364	0.0878524	0.245914	0.222738	0.416395	1.4816	1.90446	1.01239	0.130375	0.0967414	0.0324846		0.45698	0.184721	0.185766	0.491029	0.347176	0.411818	1.65576	1.29913	1.80552	1.21774	1.25645	1.101
ENSMUSG00000026185	145.061	168.77	174.106	124.907	161.483	134.062	240.582	234.872	265.222	278.962	236.229	215.661		171.807	182.282	138.135	183.603	155.611	131.367	759.217	934.195	837.395	416.816	411.85	377.995
ENSMUSG00000101968	0	0	0.0387448	0	0	0	0	0	0	0	0	0		0	0	0.0409634	0.114647	0	0	0	0	0.0853149	0.046033	0	0
ENSMUSG00000026182	0	0	0	0	0	0	0	0	0	0	0	0		0	0	0	0	0	0	0	0	0	0	0	0
ENSMUSG00000102266	0	0.0213034	0	0	0	0	0	0	0	0	0	0		0	0	0.022567	0	0	0	0.0223492	0	0.0235003	0	0.0254392	0.0243183
ENSMUSG00000101112	0	0	0	0	0	0	0	0	0	0	0	0		0	0	0	0	0.103558	0	0	0	0	0	0	0
ENSMUSG00000100697	0	0	0	0	0	0	0	0	0	0	0	0		0	0	0	0	0	0	0	0	0	0	0	0
ENSMUSG00000099877	0	0	0	0	0	0	0	0	0	0	0	0		0	0	0	0	0	0	0	0	0.0230189	0.0248404	0	0.0238201
ENSMUSG00000098697	0	0	0	0	0	0	0	0	0	0	0	0		0	0	0	0	0	0	0	0	0	0	0	0
ENSMUSG00000101812	0	0	0	0	0	0	0	0	0	0	0	0		0	0	0	0	0	0	0.10077	0	0	0	0	0
ENSMUSG00000100044	0	0	0.054305	0.152009	0	0.102956	0	0	0	0.0604424	0	0.06024		0	0	0.0574145	0.107126	0	0.109097	0.284302	0.0617728	0.239156	0	0.0647219	0.12374
ENSMUSG00000100444	0.145615	0.0815861	0.0817448	0.0254242	0.0129533	0.0129149	0	0.0281279	0.0142729	0.0758194	0.0750132	0.0604525		0.0283474	0.0572929	0.0864255	0	0.04038	0.0273705	0.0285305	0.0309953	0.0299999	0.0161869	0	0
ENSMUSG00000100429	0	0	0	0	0	0	0	0	0	0	0	0		0	0	0	0	0.0809639	0	0	0	0	0	0.0976712	0
ENSMUSG00000100301	6.06884	5.70335	6.13527	1.17798	0.989746	1.44872	0.148005	0.251504	0.301648	1.84891	1.04877	1.25305		4.65456	5.1461	4.12143	0.415081	0.809639	0.645203	0.115956	0.100779	0.121928	0.289469	0.211181	0.100938
ENSMUSG00000101344	6.65236	5.94494	6.43576	0.638824	0.781135	1.29803	0.130715	0.212027	0	2.13369	1.50786	1.13922		4.84345	4.96654	4.84986	0.540242	0.811688	0.618955	0.0716873	0.311522	0	0.325378	0.244796	0.312013
ENSMUSG00000088666	0	0	0	0	0	0	0	0	0	0	0	0		0.446584	0	0	0	0	0	0	0	0	0	0	0
ENSMUSG00000098504	5.30845	10.9056	4.91707	1.01954	1.03888	0	0.52154	0	0.572358	4.25661	3.0081	7.27261		5.68379	5.74376	9.242	1.07775	0.539759	1.64638	0	0	0.601513	0	0	0
ENSMUSG00000055322	37.8642	43.9281	46.1317	33.732	37.2468	39.2179	22.2203	22.2394	26.9302	31.1569	31.1418	25.9221		45.5042	41.4487	40.2009	26.7211	32.6157	30.8676	23.9337	18.9803	19.2895	19.6961	17.9739	17.5207
ENSMUSG00000061815	0.699511	0.509928	0.534143	1.10512	1.12609	0.506337	0.399048	0.743173	0.656896	0.697903	0.664909	0.334902		0.700651	0.561552	1.15401	0.801722	1.17013	0.793146	0.0486329	0.0792516	0.153413	0.303514	0.221427	0.211671
ENSMUSG00000026180	0.224146	0.531327	0.141963	20.6968	17.1416	2.85967	0.389615	0.0549546	0.0371807	0.118505	0.117245	0.236217		0.0923056	0.522366	1.20073	11.3944	13.9726	5.84659	0.0557411	0.0403712	0.0390747	0.0210834	0	0.0202174
ENSMUSG00000048480	0	0	0	0.609261	0.20694	0	0.0692588	0.0374472	0	0.444136	0.319573	0.321927		0	0	0	0.143122	0.250874	0.036439	0	0	0	0.0862	0	0
ENSMUSG00000087820	0	0	0	0	0	0	0	0	0	0	0	0		0	0	0	0	0	0	0	0	0	0	0	0
ENSMUSG00000094768	0	0	0	0	0	0	0	0	0	0	0	0		0	0	0	0	0	0	0	0	0	0	0	0
ENSMUSG00000006304	47.823	48.5925	47.9953	95.4233	85.4211	66.1771	61.004	54.5156	47.6887	55.4331	58.2128	55.5722		43.759	45.7871	44.6959	86.7017	81.9284	76.0307	55.2958	50.7216	51.9047	46.5608	49.8772	49.7103
ENSMUSG00000064272	0	0.0502166	0	0.0938923	0.0956738	0	0.0960603	0	0.10542	0	0.0554051	0		0	0	0	0	0	0	0.158045	0.114466	0	0.119557	0.0599656	0
ENSMUSG00000006299	22.9333	23.1199	23.0866	22.5628	24.1657	23.4565	21.9191	21.7168	21.3676	23.9723	24.5958	22.2958		23.5134	24.222	23.0691	24.962	24.0756	22.5146	22.3879	23.468	20.6134	22.5977	24.2528	20.2617
ENSMUSG00000101503	0.157346	0	0	0	0	0	0	0	0	0	0	0		0	0	0	0	0	0	0.16956	0	0	0	0	0
ENSMUSG00000026179	3.04639	3.722	3.61184	1.77202	1.78594	2.31091	2.46559	2.49513	2.66243	3.20527	3.18639	2.32887		2.95286	3.0421	2.92788	1.39639	1.86945	1.72037	1.48958	1.57899	1.71837	2.78972	2.40337	1.88833
ENSMUSG00000103013	0.988469	0.676901	0.847771	1.58204	0	1.60728	1.133	1.05017	1.2434	0.943584	1.12026	0.564255		1.23475	0.713019	1.25484	2.34133	1.34009	1.87347	0.532598	0.19287	0.933382	1.00724	1.01039	0.579523
ENSMUSG00000006301	15.5556	15.8379	15.6508	14.8981	15.7089	20.8021	10.8004	11.2338	10.3757	11.5798	11.1461	10.176		14.8064	16.4404	15.1827	19.5544	19.8818	18.7339	8.34798	9.89543	9.413	9.45733	9.4156	9.24412
ENSMUSG00000099931	10.5107	12.5161	11.9109	4.18885	3.92182	4.66396	6.35719	7.37041	6.73366	8.83188	6.96848	7.55272		10.8231	12.6963	14.9224	3.18623	3.66606	4.01031	2.11615	3.99493	3.30123	5.29449	4.87668	4.26545
ENSMUSG00000103403	3.52069	5.33047	5.02001	1.30306	1.48927	2.05732	2.43209	2.12348	2.25388	3.52886	2.28599	3.20302		3.71073	4.74191	5.60675	1.32162	1.60346	1.57342	0.652089	1.0519	0.872677	1.72651	1.41702	1.7416
ENSMUSG00000073650	0.356537	0.390649	0.415872	0.365208	0.348879	0.463791	0.560461	0.858594	0.538187	0.599011	0.646518	0.868372		0.330847	0.411493	0.413821	0.361933	0.628376	0.78633	0.665969	0.612196	1.07734	0.668489	0.5248	0.557418
ENSMUSG00000026177	2.69506	2.53523	2.62775	17.7486	17.0305	6.93315	13.2948	11.2421	8.19746	12.5113	12.2818	13.0524		2.68818	2.3482	1.6978	15.2199	12.692	9.89827	7.18421	4.89881	6.01123	4.40556	5.13268	4.14144
ENSMUSG00000026176	9.442	11.0265	9.7663	10.5354	10.8125	9.65773	10.4225	10.7514	10.4863	10.4909	11.3619	10.2038		11.0041	10.8473	10.9945	9.45686	10.1936	9.9079	10.4467	10.6849	9.80589	11.1216	10.7696	8.07711
ENSMUSG00000065468	4.94622	7.6211	5.72694	5.93731	9.07495	3.61921	6.68184	6.56869	6.66628	7.79067	9.10925	11.9998		4.63396	8.02775	6.05487	5.02107	6.28661	3.19591	3.33135	3.61916	1.40117	5.29218	9.10065	5.0748
ENSMUSG00000026175	0.162796	0.182426	0.258939	0.0994846	0.0724087	0.259898	0.0872415	0.0943405	0.0797851	0.0169531	0.184502	0.152067		0.110923	0.14412	0.144935	0.16526	0.120386	0.0765003	0.0956907	0.0693052	0.100619	0.126678	0.0726139	0.0173536
ENSMUSG00000033364	4.534	5.12011	4.67124	6.06644	5.95879	7.03308	5.49826	5.49218	5.02152	5.18287	5.68676	5.05181		4.94599	5.34199	5.0987	6.62949	7.58551	7.02605	5.67812	5.90771	5.69111	6.57642	6.16066	6.17283
ENSMUSG00000103227	1.13553	1.31221	1.46085	1.39713	1.63198	2.05989	1.3248	1.8473	1.16694	1.40238	1.32714	1.2964		1.17782	1.47821	1.39004	1.69304	1.69581	2.09105	1.68255	2.11871	1.70889	1.56208	1.58872	1.66435
ENSMUSG00000026174	5.61799	5.3616	5.71131	8.58706	9.00537	7.69216	8.42097	7.38419	7.01998	6.26238	6.6628	5.95913		6.13288	6.33135	6.57641	9.10528	9.30174	8.53441	6.9422	8.07263	8.56048	8.12934	7.86832	7.85986
ENSMUSG00000026173	0.074597	0.0306503	0.0383874	0.0143271	0.0145989	0.0145556	0.0439737	0.0396266	0.506713	0.0170903	0.0338172	0.00851655		0.295525	0.201786	0.105522	0	0.00758497	0.00771193	0.265279	0.034933	0.0422639	0.0182433	0.0274505	0.026241
ENSMUSG00000026135	3.20737	3.53705	3.54393	4.6756	4.61486	5.29654	4.94271	5.13839	5.23469	5.13203	4.34311	4.2747		4.11305	4.3167	4.02384	5.06943	5.46362	4.97133	4.53862	5.49423	5.00313	5.948	5.72247	4.4772
ENSMUSG00000093155	0	2.10323	1.40488	0.655417	2.00356	3.32936	0.670551	2.17534	2.20766	1.56365	3.86756	1.55842		3.65387	3.69242	2.22798	3.46421	2.08193	4.23355	2.20648	2.3971	1.54675	0.834573	1.67436	1.60059
ENSMUSG00000026172	4.00386	3.44781	4.36749	4.16722	5.02048	3.81266	4.00434	4.04999	4.13601	4.14703	3.61384	3.42148		4.23562	3.78742	3.13056	5.40303	5.14372	3.6683	3.10034	3.39626	4.45537	4.3975	4.08775	3.5984
ENSMUSG00000026171	8.0481	7.9452	6.94387	8.53845	9.4314	9.07429	10.2507	9.95844	7.53434	8.94315	8.02878	8.55558		7.79156	7.87377	7.26282	9.39292	10.2658	9.71522	9.60761	8.97073	10.2936	10.9903	11.468	10.115
ENSMUSG00000033276	0.424544	0.528339	0.411729	0.540971	0.463357	0.493844	0.87431	1.00617	1.14436	0.972637	0.703215	0.801603		0.620652	0.309183	0.497492	0.53871	0.689017	0.675228	1.31971	1.43372	1.49869	1.17802	1.19172	0.727562
ENSMUSG00000033257	4.83273	4.51925	4.76735	5.94555	7.03091	6.48074	6.86671	6.9314	6.39534	5.9694	5.84909	5.49137		5.63818	5.41155	5.19908	7.51614	7.98274	7.53661	6.76038	7.36045	7.14473	8.10036	7.67829	6.8428
ENSMUSG00000026170	10.1576	14.3341	11.2756	7.19963	7.5729	5.02575	8.64897	9.73816	10.6651	11.5525	13.4306	11.9556		12.6885	14.8635	11.4212	4.61555	6.63956	6.50066	11.9104	11.0423	10.5233	10.3506	9.64126	11.2866
ENSMUSG00000006542	0.171277	0.23458	0.190967	0.301542	0.153632	0.181026	0.182298	0.090984	2.00061	0.17985	0.21029	0.162952		0.871093	0.725848	0.49699	0.173869	0.203179	0.132801	1.03053	0.284067	0.50137	0.22689	0.402675	0.184098
ENSMUSG00000098351	0	0	0	0	0	0	0	0	0	0	0	0		0	0	0	0	0	0	0	0	0	0	0	0
ENSMUSG00000033227	4.89094	7.04338	5.10774	2.50954	3.16712	3.2279	6.76027	5.2981	5.48022	7.03073	11.6567	5.6386		7.13637	8.58656	7.59161	1.50895	2.8522	3.22216	3.17785	4.23831	4.78137	6.30308	5.08763	5.00402
ENSMUSG00000099472	0.0693319	0.142435	0	0.199738	0.135685	0.202924	0.20435	0.147319	0.149508	0.158841	0.235727	0.395772		0.0742342	0.375087	0.452651	0.0703811	0	0.0716761	0.373568	0.0811684	0.785617	1.10212	0.595304	1.05685
ENSMUSG00000026167	0.766584	1.37801	1.22728	1.22692	1.83362	2.07748	1.27617	0.950171	0.803573	1.12205	2.02718	1.28847		1.68717	2.1197	1.87681	1.0592	1.55892	1.93723	0.596619	0.872528	0.820378	1.24983	0.992542	1.02371
ENSMUSG00000089964	0	0.0279704	0	0	0	0	0.0267526	0	0	0	0	0		0	0	0	0	0	0	0	0	0	0	0	0
ENSMUSG00000090071	0.168983	0	0.019324	0	0	0	0.0553402	0.0398956	0.0809766	0.0215079	0	0		0.0804138	0.0406311	0.0408609	0.01906	0.0381823	0.0194107	0.0809331	0.0219813	0.0425508	0.0459179	0.115154	0
ENSMUSG00000055197	0	0	0	0	0	0	0	0	0	0	0	0		0	0	0	0	0	0	0	0	0	0	0	0
ENSMUSG00000006546	0	0.0452496	0.0906753	0	0	0	0.0432795	0	0.0474966	0.0504616	0.0499249	0.0502926		0	0	0	0	0	0	0	0.0515722	0.049916	0	0.0540343	0.15496
ENSMUSG00000065616	0	0	0	0	0	0	0	0	0	0	0	0		0	0	0	0	0	0	0	0	0	0	0	0
ENSMUSG00000047021	0	0	0.00691925	0.00645607	0	0	0.00660515	0	0.00724874	0	0.0152387	0		0	0	0	0.00682472	0.00683589	0.0069503	0.00724485	0	0	0	0.00824651	0
ENSMUSG00000089653	0	0	0	0	0	0	0	0	0	0	0	0		0	0	0	0	0	0	0	0	0	0	0	0
ENSMUSG00000006538	0.017242	0.0708436	0	0.0165575	0.0337432	0.0504647	0.0846989	0.109909	0.0185904	0.0790035	0.0195408	0.0787389		0	0.0186559	0.0562843	0.0700116	0.0525946	0.017825	0.0185804	0.0403712	0.058612	0.0632501	0.126896	0.0606522
ENSMUSG00000103145	0	0	0	0	0	0	0	0	0	0	0	0		0	0	0	0	0	0	0	0	0	0	0	0
ENSMUSG00000026162	2.96143	2.12455	2.70923	2.79871	2.71383	2.24717	2.35533	2.84663	2.17936	2.20772	2.02442	2.68332		3.01983	2.74652	2.71091	2.24275	2.96336	2.13823	1.97557	3.13682	2.39691	3.1039	2.42169	2.81105
ENSMUSG00000026205	0.0485036	0.0498226	0.0748793	0.2096	0.118654	0.118302	0.0476534	0.128828	0.104593	0	0.164911	0.0830629		0.0519331	0.0787216	0.0791669	0.098475	0.172613	0.175502	0.104537	0.14196	0.137401	0.148274	0.297476	0.113747
ENSMUSG00000033159	8.30972	9.00512	8.5619	10.174	8.38674	7.11531	9.61179	9.99758	8.82883	10.1599	9.11111	8.65648		7.98857	9.51589	9.3566	8.49227	7.45356	7.75186	7.23615	7.93774	7.165	8.6101	8.67133	7.58937
ENSMUSG00000049339	18.3999	17.1363	17.8369	19.9243	19.4622	16.7032	22.4848	22.2293	19.5554	20.8163	19.6019	19.2861		19.457	19.7002	19.068	16.7393	18.3347	17.4459	18.2041	21.1924	18.268	23.3778	20.893	17.5067
ENSMUSG00000026197	6.13916	6.45844	5.28058	6.77831	6.4426	5.3529	6.08983	6.45933	5.11633	6.45492	5.94932	6.19629		6.66851	7.05977	6.22838	5.35897	5.85023	6.07079	4.85791	5.55537	4.67123	6.74535	7.20297	5.04248
ENSMUSG00000026198	0.365848	0.365641	0.335823	0.398799	0.416042	0.540214	0.612012	0.588278	0.373136	0.430409	0.414626	0.32737		0.402303	0.331658	0.312015	0.411534	0.442369	0.419107	0.351625	0.382003	0.448164	0.398993	0.412369	0.498546
ENSMUSG00000099519	0	0	0.0103399	0	0	0	0	0	0	0	0	0		0.0107569	0	0.0218638	0.0101986	0	0	0.0108264	0.0235235	0	0	0.0123233	0
ENSMUSG00000033124	3.69389	3.64445	4.40249	4.39682	5.31026	4.11102	3.9607	4.49617	4.50396	4.32542	3.47315	3.69658		4.17969	3.94747	4.09881	4.06459	4.30308	4.38453	3.67593	3.77995	4.24765	4.71761	4.13941	3.63618
ENSMUSG00000026199	3.98598	4.30435	4.12338	3.70014	3.48032	3.2606	4.23743	4.63653	3.92302	4.80013	4.45951	4.29398		3.92858	4.65566	4.32612	3.14366	3.49174	3.2332	3.96497	4.70237	4.25025	4.37412	4.33765	3.81097
ENSMUSG00000026200	2.51866	2.76999	2.97689	3.21349	3.09158	2.99558	5.72722	5.4841	5.37367	5.1484	5.14409	4.33863		3.1065	3.00446	2.76967	3.33374	2.80528	2.90744	5.64891	5.86604	5.63731	4.41836	4.585	4.32037
ENSMUSG00000099204	0	0	0	0	0	0	0	0	0	0	0	0		0	0	0	0	0	0	0	0	0	0	0	0
ENSMUSG00000026201	5.153	5.05417	5.41117	5.57395	5.79353	6.37781	7.69115	7.61258	6.39627	6.71561	6.57828	6.61344		6.75035	6.65796	5.89822	6.68337	7.02547	6.84242	7.33295	7.65326	7.64473	8.8044	8.21839	7.41981
ENSMUSG00000026202	1.98798	1.53153	1.41759	3.54538	2.47328	1.28838	1.61831	1.01077	4.04192	1.15489	1.12652	1.2645		2.67588	5.3775	2.73486	1.98923	1.8481	1.15972	1.66793	0.398978	0.740149	0.45145	0.661873	0.499508
ENSMUSG00000096094	0.0467975	0	0	0.0449396	0	0	0	0	0.0504572	0	0	0		0.0501064	0	0	0	0.0475834	0	0	0	0	0.0572236	0	0
ENSMUSG00000026203	12.4056	12.3872	11.8512	8.43296	8.89554	11.2946	7.52188	7.9894	7.02791	12.128	8.38248	9.37618		12.7927	14.8147	12.5702	11.3126	12.0354	10.9198	7.27738	8.51426	7.70826	9.96676	9.84619	7.03388
ENSMUSG00000026204	0.902898	0.495488	0.776502	0.831419	1.17397	1.37562	0.571128	0.657023	0.506757	0.538391	0.476596	0.395381		0.900524	1.11077	0.60563	1.46901	1.30792	1.39375	2.22587	3.47521	4.14844	6.98732	8.08632	3.49519
ENSMUSG00000101840	0	0	0	0	0	0	0.133763	0	0	0	0	0		0.145776	0	0	0	0	0.140753	0	0	0	0	0	0
ENSMUSG00000033061	0.152772	0.313854	0.157232	0.0978045	0.0996603	0.0496823	0	0.0541026	0	0	0	0.0581386		0	0.1102	0.166235	0.0516946	0	0.0526458	0	0	0	0	0	0
ENSMUSG00000100556	0	0	0	0	0	0	0	0	0	0	0	0		0	0	0	0	0	0	0	0	0	0	0	0
ENSMUSG00000026209	8.62619	8.26923	8.66363	10.1546	12.0978	8.28435	9.05283	8.65691	7.66257	8.66024	8.66536	8.93901		9.68219	8.21991	7.13311	9.66474	10.2412	8.72784	10.1541	8.65003	9.31637	9.60411	9.76939	8.79297
ENSMUSG00000026208	4.17181	3.72444	4.91314	12.5563	6.31507	4.3569	4.96519	2.58793	40.6636	3.36764	3.04625	2.9568		9.84792	13.8447	5.68193	4.47653	5.30945	5.07992	10.0926	3.27787	3.06156	2.60198	3.38285	2.31454
ENSMUSG00000085653	0.0606155	0.0622639	0.187155	0	0	0	0	0.0643989	0.261423	0	0	0.0692031		0.259606	0.590276	0.197872	0	0	0	0.130641	0.141928	0.0686849	0	0	0
ENSMUSG00000026207	0.445474	0.283875	0.802338	0.324802	0.339037	0.631797	0.883437	0.902737	1.55212	1.14816	0.776002	1.01246		1.35142	1.15146	0.763004	0.410344	0.381657	0.571406	1.33348	1.0334	1.03293	0.696034	0.566663	0.517512
ENSMUSG00000086053	0	0	0	0	0	0	0	0	0	0	0	0		0	0	0	0	0	0	0	0	0	0	0	0
ENSMUSG00000033021	8.73334	7.75369	7.5881	12.7696	13.0333	9.31247	12.3745	12.1226	11.2854	10.3812	10.8925	10.4967		9.18638	8.92717	8.09423	12.3181	12.8291	9.79991	13.6912	11.9712	12.0343	12.5841	11.5199	11.1152
ENSMUSG00000033007	0	0.0395914	0.0396683	0.0185065	0	0.056405	0.0189338	0.122847	0	0.0441515	0.021841	0.0440037		0.0825369	0.10426	0	0.0391264	0	0.0199232	0	0.0451233	0.0218371	0.259217	0.18911	0.135583
ENSMUSG00000102605	0	0	0	0.0230233	0	0.0467811	0	0.0254716	0	0	0.0543435	0.0273718		0.0513408	0	0	0.048676	0.0243778	0.0495716	0.0258362	0.0561366	0.0815006	0.117267	0.0294083	0.140562
ENSMUSG00000032997	5.60154	5.52988	5.69493	6.49162	7.33495	8.39022	10.2569	11.9313	10.7126	9.6015	8.78888	8.55796		7.52984	7.87473	6.40661	7.78926	9.06308	8.49619	12.2783	12.2541	13.3277	12.2325	12.5883	10.931
ENSMUSG00000026211	2.22206	1.77881	2.1975	2.72989	3.45585	3.13071	3.37834	4.02252	4.61766	3.86075	3.72121	3.1888		2.76463	2.89454	2.53945	2.73455	3.09244	3.09287	5.77901	4.13465	4.44496	4.5766	4.54522	3.71177
ENSMUSG00000051703	0.230867	0.194028	0.324008	0.100773	0.41074	0.47095	0.659839	0.468255	0.565729	0.312543	0.42815	0.287535		0.426965	0.295216	0.342561	0.298276	0.320105	0.43395	0.45234	0.589703	0.808583	0.461948	0.669344	0.393755
ENSMUSG00000032968	0.463184	0.365985	0.733394	0.650085	0.383506	0.764737	0.980141	1.51414	1.88238	1.55093	1.29216	1.261		1.14446	0.462616	0.542772	0.578699	0.68833	0.773519	1.49741	1.62678	1.97826	0.958486	1.1363	0.835561
ENSMUSG00000082745	2.67222	1.82993	1.5279	2.56612	2.32428	1.15869	1.16683	1.57723	3.20132	2.72093	1.346	2.37284		2.54326	2.89135	0.323078	0.904218	2.11329	3.06952	3.51956	1.73801	2.35508	2.9045	2.54938	3.4815
ENSMUSG00000026213	2.45244	2.73533	2.27917	4.13017	3.69814	2.72297	5.71796	5.04575	5.20952	4.90578	4.09653	3.93865		3.04716	3.0001	2.79801	3.34417	3.666	2.99892	4.7038	5.43157	4.5313	5.18081	5.197	4.39931
ENSMUSG00000082059	0	0.310246	0	0	0	0	0	0	0	0	0	0		0	0	0	0	0.153552	0.312244	0	0	0	0	0	0.177076
ENSMUSG00000006576	3.14747	2.6869	3.05065	2.29476	2.7031	2.87992	3.12232	3.07771	3.92077	3.40943	4.23898	2.82587		3.06901	3.59735	3.08568	2.30792	2.39869	2.59048	3.99111	4.67936	3.75346	3.74408	3.59835	2.73034
ENSMUSG00000083244	0	0	0	0	0	0	0	0	0	0	0	0		0	0	0	0	0	0	0	0	0	0.130614	0	0
ENSMUSG00000082528	0	0	0	0	0	0	0	0	0	0	0	0		0	0	0	0	0	0	0	0	0	0	0	0
ENSMUSG00000082012	0	0	0	0.0638824	0	0	0.0653575	0	0.0717258	0	0	0		0.0712272	0	0	0	0	0	0	0.0778806	0	0	0.0815987	0
ENSMUSG00000099996	0	0	0	0	0	0	0	0	0	0	0	0		0	0	0	0	0	0	0	0	0	0	0	0
ENSMUSG00000101763	0	0	0	0	0	0	0	0	0	0	0	0		0	0	0	0	0	0	0	0	0	0	0	0
ENSMUSG00000100827	0	0	0	0	0	0	0	0	0	0	0	0		0	0	0	0	0	0	0	0	0	0	0	0
ENSMUSG00000100553	0	0	0	0	0	0	0.070794	0.0255182	0.0517947	0.027514	0.0272214	0.0548438		0	0	0	0	0	0	0.0258834	0.0562392	0.0816496	0.0293703	0	0.0281639
ENSMUSG00000098611	0	0	0	0	0	0	0	0	0	0	0	0		0	0	0	0	0	0	0	0	0	0	0	0
ENSMUSG00000100534	0	0	0	0	0	0	0	0	0	0	0	0		0	0	0	0	0	0	0	0	0	0	0	0
ENSMUSG00000102904	0	0	0	0	0	0	0	0	0	0	0	0		0	0	0	0	0	0	0	0	0	0	0	0
ENSMUSG00000089326	0	0	0	0	0	0	0	0	0	0	0	0		0	0	0	0	0	0	0	0	0	0	0	0
ENSMUSG00000026235	3.11903	2.86201	2.88773	1.62292	2.04958	2.47639	2.39763	2.38476	2.06138	2.12279	2.66965	2.45837		2.57104	2.51345	2.18686	1.84807	1.78474	1.85509	2.91814	2.54384	2.32905	1.97079	1.79286	2.00461
ENSMUSG00000099141	0	0	0.466274	0.435061	0.443316	0.442001	0.445107	1.44398	0.488478	1.03794	0	0		0.970164	0.4902	0	0	0	0	0.488215	1.59118	1.02672	0.553984	0	0
ENSMUSG00000101849	0	0	0	0.0272943	0.0556243	0	0.0279245	0.120787	0	0	0	0		0.0304324	0.0307535	0	0	0	0	0.0612579	0	0	0	0	0
ENSMUSG00000101506	0	0	0	0	0	0	0.353647	0	0	0.412333	0	0.205476		0.192704	0	0	0	0	0	0	0	0	0	0	0
ENSMUSG00000065215	0	0	0	0	0	0	0	0	0	0	0	0		0	0	0	0	0	0	0	0	0	0	0	0
ENSMUSG00000102052	0	0	0	0	0	0	0	0	0	0	0	0		0	0	0	0	0	0	0	0	0	0	0	0
ENSMUSG00000004872	0	0	0.00874217	0	0	0	0	0	0	0	0	0		0.0090948	0	0	0	0	0	0	0	0	0	0	0
ENSMUSG00000032908	0.827306	0.607003	0.716305	0.0630524	0.205596	0.128116	0.374148	0.516205	0.240699	0.481364	0.625072	0.46476		0.731138	0.724644	0.571563	0.119975	0.146876	0.135758	0.438686	0.307475	0.41664	0.51384	0.386585	0.354153
ENSMUSG00000099561	0	0	0	0	0	0	0	0	0	0	0	0.0413787		0	0	0	0	0	0	0	0	0	0	0.0444572	0
ENSMUSG00000102945	0	0	0	0	0	0	0	0	0	0	0	0.0733485		0	0.069515	0.139816	0	0	0	0	0.0752148	0	0.0785601	0	0
ENSMUSG00000026245	13.5195	12.9394	12.4278	19.4549	21.4335	19.6674	13.9526	12.5306	12.0464	10.9602	11.8439	12.4807		11.7908	11.6331	9.66905	23.4979	21.3133	21.4626	11.7373	10.8962	12.7964	12.5336	12.2775	12.348
ENSMUSG00000101798	0	0	0	0	0	0	0	0	0	0	0	0		0	0	0	0	0	0	0	0	0	0	0	0
ENSMUSG00000104018	1.2792	1.24098	1.53596	1.16016	1.59942	1.69867	1.50115	1.51004	1.53248	1.26181	1.00677	1.33872		1.25551	1.15341	1.12127	1.62319	1.62585	1.65306	1.7997	2.20477	1.73133	1.39039	1.87418	1.20829
ENSMUSG00000090486	0.0317544	0.048927	0.0490222	0	0.0310723	0	0	0.0168682	0	0	0	0.0181266		0.0849993	0.0687169	0.0345528	0.0161175	0	0	0	0	0	0.0388291	0.0389504	0
ENSMUSG00000012187	0.607166	0.519732	0.90262	0.0647845	0.0660137	0.0658179	0	0.107511	0.181847	0.0772794	0.191144	0.154041		0.72233	0.474469	0.440448	0.0342419	0.17149	0.0697439	0.0363498	0.0789803	0.0764439	0.12374	0.248253	0.237314
ENSMUSG00000099364	0	0	0	0.0964954	0.0245816	0	0	0	0.0812573	0	0	0		0	0.0543626	0	0.0255014	0	0	0.0812136	0	0	0	0	0
ENSMUSG00000100562	0	0	0	0	0	0	0	0	0	0	0	0		0	0	0	0	0	0	0.0560168	0	0	0	0	0
ENSMUSG00000032883	19.2869	19.7495	19.6638	10.9343	10.056	19.252	10.8313	11.3667	10.6122	14.5493	12.7132	13.3989		16.4921	17.8277	17.2854	14.681	18.0287	18.7918	6.61606	7.00407	8.00922	11.5339	11.8806	11.5268
ENSMUSG00000079470	7.76088	8.76632	8.68476	6.4538	6.77046	12.1787	5.43287	6.54388	6.06554	6.64802	5.98785	6.75859		6.96133	8.9823	8.77247	11.5813	13.7505	14.9499	4.00465	5.86493	4.77701	7.28064	6.51429	6.01862
ENSMUSG00000099377	0.0304835	0.0313125	0.125494	0.0878198	0.119315	0.0594804	0.119797	0.129545	0.0657348	0.104757	0.103643	0		0.0979168	0.0989499	0.0995097	0.185669	0.0309954	0.0315142	0.0985492	0.107063	0	0.07455	0.186958	0.142976
ENSMUSG00000099706	0	0	0	0	0	0	0	0.017007	0	0	0	0		0	0	0	0	0	0	0	0	0	0	0	0
ENSMUSG00000047330	1.20654	1.11745	1.54711	3.03904	2.94187	3.01033	1.59347	1.42894	2.21791	1.2235	1.47948	1.64845		1.77894	1.79771	1.26982	3.7547	3.8614	2.96497	5.43523	3.12607	2.98085	1.45116	1.45569	1.8786
ENSMUSG00000101324	0.0762752	0.0783495	0	0.0732469	0.149273	0.148831	0.149876	0	0.24672	0	0.0864448	0		0.0816684	0.0825301	0	0.309718	0.155112	0.236562	0.246588	0	0.259288	0	0.0935602	0
ENSMUSG00000072978	0	0	0	0	0	0.115738	0	0	0	0	0	0		0	0.128359	0	0	0	0	0	0	0	0	0	0
ENSMUSG00000050711	0.250753	0.0429287	0.0860243	0	0.0204472	0	0	0.0222003	0.0225302	0.0239366	0	0.0715695		0.0894943	0	0.0454751	0.106061	0.127482	0.108013	0.0900723	0.048927	0.0236778	0.0511031	0.0768942	0.0980081
ENSMUSG00000099562	0	0	0.0399172	0	0	0	0.0762102	0	0	0	0	0.0442798		0.0830546	0	0.0844057	0.0393718	0	0	0.0417955	0	0.0878964	0.0474259	0.142722	0.0454779
ENSMUSG00000077782	0	0	0	0	0	0	0	0	0	0	0	0		0	0	0	0	0	0	0	0	0	0	0	0
ENSMUSG00000054702	0.0730419	0.0937853	0	0.227961	0.214418	0.0890759	0.143523	0.252203	0.0196885	0.230093	0.227646	0.208475		0.0195516	0.0592737	0.059609	0.296588	0.222805	0.283168	0.118067	0.0213779	0.0827655	0.0669862	0.15679	0.149881
ENSMUSG00000102235	0.0347347	0	0.0357487	0.133423	0.0679771	0.101663	0.204755	0.0738055	0.074902	0.0397889	0.0787316	0.198278		0	0	0.0377957	0.211562	0.035318	0.0359091	0	0.0406647	0.0787175	0.0849466	0.21303	0.0814575
ENSMUSG00000073643	9.87405	9.85137	9.35365	12.0334	12.2855	13.466	10.2421	10.9895	9.9912	9.33444	9.8686	9.53438		10.6069	11.0256	9.61602	13.5592	13.4002	14.353	10.0644	10.2606	10.9407	11.5985	11.3367	10.0583
ENSMUSG00000104497	0	0	0	0	0.0287128	0	0	0.0311747	0	0	0	0		0	0	0	0.0297872	0	0	0	0	0	0.0358806	0	0
ENSMUSG00000026248	4.79504	4.0717	4.70472	6.32374	6.97549	4.58455	5.77881	5.77357	4.17048	5.74909	5.07206	4.92693		5.20253	4.21978	4.66106	6.19807	6.24072	5.78336	5.33948	5.9879	5.86804	6.17604	5.96008	6.22223
ENSMUSG00000026249	7.26124	7.2242	6.95107	10.5965	12.2496	10.0663	30.5047	31.1071	22.3248	24.0018	21.3532	25.7966		17.2401	18.9041	13.9598	24.5468	21.5434	19.0717	36.8487	48.7335	64.0841	62.7888	61.1259	49.8885
ENSMUSG00000067106	0.117965	0	0	0	0.0577157	0	0	0	0	0	0.0668468	0		0.0631532	0.0638196	0	0	0.0599732	0.060977	0	0.0690524	0	0.0721236	0	0
ENSMUSG00000100397	0.439779	0.112935	0	0	0.107583	0.107264	0.108018	0	0	0	0.124603	0		0	0	0	0	0.111791	0	0	0	0.249162	0.403319	0.26972	0
ENSMUSG00000099753	0	0	0	0	0	0	0	0	0.214634	0	0	0		0	0	0	0	0	0	0	0	0	0	0	0
ENSMUSG00000096297	0	0	0	0	0	0	0	0	0	0	0	0		0.525883	0	0	0	0	0	0	0	0	0	0	0
ENSMUSG00000102518	0	0	0	0.0275927	0.0281163	0.0280329	0.0282299	0	0	0	0	0		0	0	0	0.087505	0	0	0	0	0	0	0	0
ENSMUSG00000099552	0	0	0	0	0	0	0	0	0.0971511	0	0	0		0	0	0	0.0228671	0	0	0	0.0527438	0.025525	0	0.0828928	0.0528269
ENSMUSG00000043230	0.125239	0.112565	0.193343	0.135301	0.107231	0.168005	0.0615221	0.133057	0.135033	0.107597	0.141937	0.0714913		0.150857	0.0677548	0.119242	0.0635673	0.0636713	0.0323685	0.151831	0.0916379	0.159651	0.0191427	0.134418	0.0550693
ENSMUSG00000101257	0	0	0	0	0	0	0	0	0.271488	0	0	0		0.0385144	0	0	0	0	0	0.0387631	0	0.122279	0.0879701	0	0
ENSMUSG00000103404	0.360265	0.138773	0.41713	0.302716	0.352526	0.307545	0.132731	0.430595	0.291329	0.309515	0.306223	0.257065		0.241086	0.341082	0.490016	0.320002	0.228947	0.139667	0.0970573	0.316327	0.25514	0.220264	0.60762	0.211217
ENSMUSG00000004364	32.3755	32.8572	34.3307	38.64	40.0275	37.9517	27.9724	27.831	26.5584	28.2905	29.1874	29.7718		31.1313	31.8331	31.6729	35.8651	34.904	36.0345	24.7195	25.0623	24.6485	26.0846	26.6689	29.0346
ENSMUSG00000103076	4.84005	6.35092	5.49555	6.14721	5.22497	5.23993	4.69386	5.14215	5.52157	5.6874	5.13147	5.27621		5.31602	4.93288	5.98012	5.51557	6.06435	5.77847	4.54275	3.94817	4.95364	4.92562	5.13252	6.04143
ENSMUSG00000103525	1.87898	2.31609	1.93383	2.27629	2.12148	2.56643	2.07325	2.11911	2.05709	2.01993	2.81749	2.27719		1.98089	2.1269	2.01311	1.87807	2.35143	2.51032	1.58871	2.16592	2.26014	2.19156	2.51753	2.23712
ENSMUSG00000101722	0.212173	0.100589	0.201569	0.329133	0.38329	0.111461	0.0160349	0.0693588	0.052792	0.0560875	0.018497	0.0931663		0.052425	0.088297	0.106556	0.215384	0.116166	0.286838	0.0879394	0.0573221	0.0369874	0	0.0200196	0.0191375
ENSMUSG00000090637	0	0	0	0.0969589	0.074099	0	0	0	0.0272158	0	0	0		0	0	0	0.0768715	0.0513316	0.130477	0	0.0295512	0	0	0	0
ENSMUSG00000101483	0	0	0	0	0	0	0.0533393	0	0	0	0	0.0619825		0	0	0	0	0	0	0	0	0	0	0	0
ENSMUSG00000110100	0	0	0	0	0	0	0	0	0	0	0	0		0	0	0	0	0	0	0	0	0	0	0	0
ENSMUSG00000038608	12.5091	13.3901	13.3569	9.80776	9.78834	8.84989	17.762	17.8991	15.0476	16.9064	16.3484	16.6691		13.0609	13.98	14.3815	8.84329	9.87283	10.3147	10.4573	11.4415	10.8818	14.7964	13.6111	15.2041
ENSMUSG00000103192	0.975405	1.27518	1.52103	1.14956	1.0123	1.08139	2.39577	2.29239	2.1193	1.99766	1.59118	1.85599		1.17096	1.34323	1.97799	0.780129	1.09697	1.23756	1.67223	1.62638	1.57415	1.8975	2.24787	1.80224
ENSMUSG00000104488	0.481364	0.698054	0.466274	1.63148	1.60702	0.745877	1.86389	1.50414	1.49596	1.16768	1.15527	1.42239		0.63667	0.61275	0.862703	1.66715	1.06527	1.37583	0.854377	0.596693	0.737955	0.588608	0.659912	0.896449
ENSMUSG00000102721	0.401391	0.353406	0.413109	1.48676	1.87968	0.867123	1.57742	1.43164	0.927388	0.952438	1.26724	1.30931		0.798149	0.465329	0.561554	1.2515	1.04948	1.48201	0.957786	0.805573	0.617265	0.350584	0.773696	0.773224
ENSMUSG00000099949	0.232538	0.119431	0.239327	0	0	0	0.342693	0	0.125361	0.133187	0.131771	0		0.24898	0	0.506061	0.354085	0	0	0.125294	0	0	0	0.142617	0
ENSMUSG00000099918	0	0	0	0	0	0.108627	0	0	0	0	0	0		0	0	0	0	0	0	0	0	0	0	0	0
ENSMUSG00000054976	0.0126048	0.0345269	0.0129728	0.00806957	0.0205567	0	0	0	0	0.00481297	0.00952358	0.00479686		0.00899737	0.0454615	0.00914373	0	0	0.00434366	0.00452774	0	0	0	0.0103075	0
ENSMUSG00000104029	0.0262244	0.0269375	0.0269899	0	0	0	0.0515294	0.0835836	0	0.0600805	0.0297208	0.0299397		0	0	0.0285354	0	0	0	0	0.0307014	0.0297155	0	0	0
ENSMUSG00000101986	0	0	0	0	0	0.03501	0	0.0190624	0.0193456	0	0	0		0	0.0194139	0.0195237	0.036428	0	0.0185492	0	0	0	0.02194	0	0.0210388
ENSMUSG00000087008	0.106708	0.0548049	0.0549115	0.0512357	0.156623	0	0	0.0566841	0.0575263	0	0.0604675	0		0.0571264	0.0577292	0.0580557	0.108323	0	0.110316	0	0.0624626	0	0	0.0654446	0
ENSMUSG00000100561	0	0	0	0	0	0.0726234	0.0731338	0	0.0802598	0	0	0.0849845		0.0797019	0	0	0	0	0	0	0	0.0843481	0	0	0
ENSMUSG00000103571	0	0	0	0	0	0	0	0	0	0	0	0		0	0	0	0	0	0	0	0	0	0	0	0
ENSMUSG00000098797	0	0	0	0	0	0	0	0	0	0	0	0		0	0	0	0	0	0	0	0	0	0	0	0
ENSMUSG00000055980	21.8629	21.4302	22.4952	17.9483	18.7556	21.868	12.7105	11.8702	15.1759	15.3003	17.1178	15.1704		19.8026	20.0862	20.156	14.224	13.0435	13.6955	15.3102	11.2434	11.8396	10.7314	10.6522	10.3446
ENSMUSG00000022591	0.0186228	0	0.0191665	0.0178835	0.0364456	0.0363374	0	0	0	0	0.0211058	0.0425224		0	0	0	0	0	0	0.0200684	0	0.021102	0	0	0
ENSMUSG00000026142	4.07392	3.99873	4.19285	4.89747	4.44411	3.8421	5.08468	4.68889	4.31117	4.0272	4.51449	4.18598		4.85472	4.35086	4.26875	4.50318	4.46452	4.54704	4.26007	4.72527	4.70175	4.39115	4.6825	4.36117
ENSMUSG00000104493	0.463763	0.552595	0.55367	0.463164	0.599017	0.39816	1.02062	0.630668	0.560034	0.701243	0.588667	0.720074		0.536279	0.642296	0.706485	0.715586	0.773343	0.690398	0.839599	0.999005	0.840802	0.79392	0.819155	0.435034
ENSMUSG00000100786	0	0	0	0	0	0	0	0	0	0	0	0		0	0	0	0	0	0	0	0	0	0	0	0
ENSMUSG00000096779	0	0	0	0	0	0	0	0	0	0	0	0		0	0	0	0	0	0	0	0	0	0	0	0
ENSMUSG00000067158	1.87196	3.02165	2.5943	1.3411	1.61853	1.91811	1.72238	1.84675	3.08093	2.34857	2.83434	1.96755		2.69364	3.42401	2.4303	0.809382	1.6617	1.96085	1.82515	3.70476	2.2839	2.32535	2.12609	1.89885
ENSMUSG00000079465	1.49746	3.08721	1.92105	1.69625	1.64588	2.24287	1.59554	1.33325	2.14328	1.2382	1.38638	1.25813		2.35421	3.23482	2.4384	1.12404	1.96224	1.8588	0.789804	1.71608	1.43393	1.43134	1.46815	1.65077
ENSMUSG00000065055	0	0	0	0	0	0	0	0	0	0	0	0		0	0	0	0	0	0	0	0	0	0	0	0
ENSMUSG00000097564	0.121008	0.136728	0.136994	0.0813423	0.213135	0.188891	0.142664	0.0899924	0.104377	0.124754	0.109713	0.165781		0.129564	0.0916515	0.105337	0.135123	0.18456	0.112589	0.156481	0.141666	0.205675	0.0591869	0.133587	0.0993226
ENSMUSG00000026150	10.6755	10.3683	10.8375	8.62756	8.12191	8.48142	9.32951	9.04146	8.04914	9.19946	10.0783	9.6852		9.98284	10.77	10.5027	9.4264	9.05298	9.26019	8.94449	9.61634	9.63709	9.96501	10.016	10.3704
ENSMUSG00000101450	2.89381	4.40568	4.46743	3.12628	3.23617	3.57947	3.85847	4.11754	4.34587	3.78844	3.92385	3.1268		3.98368	3.63433	4.44209	3.672	3.99326	4.70117	3.28549	5.62624	3.51326	3.6649	4.12005	3.57496
ENSMUSG00000026149	0	0	0	0	0	0	0	0	0	0	0	0		0	0	0	0	0	0.0360282	0	0	0	0	0	0
ENSMUSG00000114299	0	0	0	0	0	0	0	0	0	0	0	0		0	0	0	0	0	0	0	0	0	0	0	0
ENSMUSG00000099771	0	0	0	0	0	0	0	0	0	0	0	0		0	0	0	0	0	0	0	0	0	0	0	0
ENSMUSG00000102280	0	0	0.0517092	0	0	0	0	0	0	0	0	0.0573605		0	0	0	0	0	0	0.0541424	0	0	0	0	0
ENSMUSG00000100170	0	0	0	0	0.14089	0	0	0	0	0	0.163179	0		0	0	0	0	0	0	0	0	0	0	0	0
ENSMUSG00000100744	0	0	0	0	0	0	0	0	0	0.153966	0	0		0	0	0	0	0	0	0	0	0	0	0	0
ENSMUSG00000093782	0	0	0	0	0	0	0	0	0	0	0	0		0	0	0	0	0	0	0	0	0	0	0	0
ENSMUSG00000026159	13.4581	12.2788	12.9736	19.2683	20.5478	18.2241	16.5416	15.2637	13.2467	12.817	13.8458	13.8404		13.7117	13.0832	12.6729	21.6348	20.4911	20.0434	16.0901	16.1446	15.4983	14.8698	15.8389	15.2219
ENSMUSG00000113880	0.586827	0.200929	0.335532	0.313071	0.510419	0.508904	0.512481	0.623455	0.210906	0.597525	0.295585	0.148881		0.139627	0.2822	0.354745	0.264759	0.530384	0.404446	0.491849	0.534342	0.295532	0.717567	0.559852	0.15291
ENSMUSG00000113973	0.0660221	0.0678176	0.0679495	0	0.0646039	0.128824	0	0	0	0	0	0		0.0706904	0.0714362	0	0	0	0	0.142294	0	0.0748113	0	0	0
ENSMUSG00000113846	0	0	0	0	0	0	0	0	0	0	0	0		0	0	0	0	0	0	0	0	0	0	0	0
ENSMUSG00000113084	0	0	0	0	0	0	0	0	0	0	0	0		0	0	0	0	0	0	0	0	0	0	0	0
ENSMUSG00000113925	0	0	0	0	0	0	0	0	0	0	0	0		0	0	0	0	0	0	0	0	0	0	0	0
ENSMUSG00000114011	0	0	0	0	0	0	0	0	0	0	0	0		0	0	0	0	0	0	0	0	0	0	0	0
ENSMUSG00000113097	0	0	0	0	0	0	0	0	0	0	0	0		0	0	0	0	0	0	0	0	0	0	0	0
ENSMUSG00000101784	0.0368539	0	0.0379297	0	0	0.0359552	0	0.0391542	0	0	0	0.0841502		0.0789194	0.039876	0	0	0.0374728	0.0380999	0	0.0862913	0.04176	0.0450646	0.135616	0
ENSMUSG00000038496	0.685855	0.827795	0.68823	0.329312	0.184558	0.301109	0.151612	0.200382	0.221847	0.412468	0.174892	0.35236		0.514045	0.649335	0.541064	0.226276	0.313818	0.230439	0.184773	0.22081	0.116574	0.377396	0.315479	0.080421
ENSMUSG00000100432	0	0.085687	0	0	0.0816265	0.0813843	0	0	0.0899419	0.0955566	0	0		0	0	0	0	0	0	0	0	0.0945235	0	0	0.0978136
ENSMUSG00000100190	0	0	0	0	0	0	0	0	0	0	0	0		0	0	0	0	0	0	0	0	0	0	0	0
ENSMUSG00000113267	0	0	0	0	0	0	0	0.0550087	0	0	0	0		0	0.0560229	0	0	0	0	0	0	0	0	0	0
ENSMUSG00000104423	0	0	0	0	0	0	0	0	0	0	0	0		0	0	0	0	0	0	0	0	0	0	0	0
ENSMUSG00000101315	0.0529774	0	0.054524	0	0	0	0	0	0	0.121372	0	0		0	0	0.0576461	0	0	0	0.0570897	0	0.06003	0	0.0649828	0
ENSMUSG00000099691	0	0	0	0	0	0	0	0	0	0	0	0		0	0	0	0	0	0	0	0	0	0	0	0
ENSMUSG00000026166	0	0	0	0.106546	0	0	0	0	0.0398757	0	0	0		0	0	0	0	0	0	0	0	0	0	0	0
ENSMUSG00000101173	0	0	0	0.126802	0	0	0	0	0	0	0	0		0	0	0	0.134042	0	0	0	0	0	0	0	0
ENSMUSG00000053161	0	0	0	0.0707483	0.0720907	0.0239589	0	0	0	0.0281311	0	0		0	0	0	0.0498587	0	0.0253881	0	0.0862509	0	0	0	0.0863868
ENSMUSG00000101896	0	0	0	0	0	0	0	0	0	0	0	0.0713425		0	0	0	0	0.0635388	0	0	0	0	0	0	0
ENSMUSG00000084443	0	0	0	0	0	0	0	0	0	0	0	0		0	0	0	0	0	0	0	0	0	0	0	0
ENSMUSG00000026163	4.17057	5.03735	3.59384	2.33362	2.45823	3.07569	2.74778	3.11093	3.02142	3.81818	3.29375	3.07431		4.79949	6.24181	5.06815	2.68356	3.03855	3.72879	0.63109	0.269119	0.452732	2.42941	1.92006	2.47723
ENSMUSG00000079140	0	0	0	0.0640446	0	0	0.0655234	0	0	0	0	0		0.071408	0	0	0	0.0678124	0	0	0	0.0755708	0	0	0
ENSMUSG00000104374	0.530021	0.753833	0.503533	0.54813	0.598425	0.59665	0.280393	0.649734	0.395633	0.373627	0.369654	0.512017		0.436536	0.661713	0.754184	0.455266	0.538922	0.716539	0.131807	0.143194	0.0461984	0.299126	0.700141	0.669291
ENSMUSG00000104219	0	0	0	0	0	0	0	0	0	0	0	0		0	0	0	0	0	0	0	0	0	0	0	0
ENSMUSG00000100580	0	0	0	0	0	0	0.0240598	0	0	0	0	0		0	0.0529946	0	0	0	0	0	0	0	0	0.0300387	0
ENSMUSG00000094946	0	0	0	0	0	0	0	0	0	0	0	0		0	0	0	0	0	0	0	0	0	0	0	0
ENSMUSG00000077736	0	0	0	0	0	0	0	0	0	0	0	0		0	0	0	0	0	0	0	0	0	0	0	0
ENSMUSG00000045658	6.75248	6.88988	6.32745	22.331	18.2806	9.88801	10.5704	11.4852	9.00013	9.2894	9.97776	10.411		7.3883	7.02093	6.2909	16.0203	14.7649	13.689	14.4077	13.5143	12.3734	10.7261	10.8622	12.1556
ENSMUSG00000102750	2.74916	3.02094	3.55321	11.6958	10.0722	5.27067	5.18209	6.62263	4.48068	5.19981	5.2532	5.98531		4.07304	3.32048	3.61754	8.43717	8.77601	7.66708	6.85521	7.93397	6.19405	7.07509	5.56797	5.95985
ENSMUSG00000101934	0	0	0	0	0	0	0	0	0	0	0	0		0	0	0	0	0	0	0	0	0	0	0	0
ENSMUSG00000098851	1.8603	3.82179	2.87192	15.1848	11.8322	4.08362	5.94001	7.90568	4.51301	4.26199	5.27084	5.30965		4.48164	7.54822	3.54243	15.5798	10.4035	10.5776	9.52236	7.07818	7.90484	5.11822	3.42281	3.81733
ENSMUSG00000036766	0.494338	0.169261	0.293955	0.210983	0.257983	0.150044	0.0539637	0.105039	0.355331	0.0755025	0.0746996	0.100333		0.258765	0.273381	0.215161	0.189576	0.156377	0.079497	0.319626	0.501568	0.174268	0.241789	0.390766	0.167453
ENSMUSG00000104396	0	0	0.0373406	0.0522614	0.053253	0	0	0.019273	0.0195593	0	0	0.0414215		0.0194234	0.0196283	0	0.0368304	0.0368907	0	0.0390977	0.0212377	0.0205557	0	0	0
ENSMUSG00000102481	0	0	0.0127116	0.0237213	0	0	0	0.0131219	0.0133169	0.0141482	0.0139978	0		0	0.0133639	0	0	0.0125584	0	0.0798585	0.0433789	0.0419857	0	0.0302999	0.0434472
ENSMUSG00000093254	0	0	0	0	0	0	0	0	0	0	0.773513	0		0	0	0	0	0	0	0.735493	0	0	0	0	0
ENSMUSG00000026219	16.0785	15.4492	17.4895	21.657	21.6404	20.1802	27.8021	25.3692	22.9302	23.6727	22.6854	24.3415		17.012	17.0819	16.2898	23.2214	22.7122	23.7993	27.305	29.8382	28.7257	26.1523	26.7272	26.73
ENSMUSG00000103505	2.32652	1.91184	2.50086	3.45053	2.88363	2.82463	5.15562	5.05333	4.06928	3.93836	4.13085	3.83664		2.93388	2.29355	2.70032	3.25394	3.46954	3.68795	6.21208	6.47639	5.88761	4.39372	3.74158	4.48605
ENSMUSG00000104503	1.27038	1.47663	1.6286	2.30077	1.96277	1.97869	2.40864	2.88877	2.78751	2.61686	2.63955	2.65899		1.99258	1.63982	1.77035	2.14934	2.41346	2.45386	3.15828	3.60074	3.00527	2.64352	2.96617	2.50881
ENSMUSG00000073633	1.73711	1.73409	1.23385	0.869313	0.861866	0.81157	0.721123	1.03974	0.580351	0.92487	0.582295	0.782111		1.17883	0.953015	0.958406	0.57124	0.895578	0.657632	0.711867	0.830654	0.859424	0.658178	0.750267	0.688521
ENSMUSG00000026220	0.109748	0.193256	0.209768	0.436619	0.368196	0.183552	0.0924208	0.0832844	0.0676174	0.233475	0.177686	0.214794		0.134295	0.16964	0.0852997	0.175071	0.255065	0.0810419	0.0675811	0.0917746	0.0710618	0.0958564	0.0769248	0.110303
ENSMUSG00000096802	0	0	0	0.056641	0.0577157	0	0	0	0	0	0	0		0	0.0638196	0	0.0598753	0.119946	0.060977	0	0	0	0	0	0
ENSMUSG00000099693	0	0	0	0	0	0	0.20248	0	0	0	0	0		0	0	0	0	0	0	0	0	0	0	0	0
ENSMUSG00000052477	0.041197	0.0282116	0.0141332	0.0659356	0.0268747	0.0669873	0.148408	0.0291789	0.103644	0.0157305	0.0622529	0.0783892		0	0	0	0.111521	0.0558517	0.0993764	0.103588	0.0482302	0.0778022	0.0335836	0.0505328	0.0483062
ENSMUSG00000064281	0	0.274024	0	0	0.087013	0	0	0.188947	0	0	0	0		0.0952107	0	0	0	0	0	0	0	0	0.108735	0.218149	0.104268
ENSMUSG00000098842	0	0	0	0	0	0	0	0	0	0	0	0		0	0	0	0	0	0	0	0	0	0	0	0
ENSMUSG00000061852	0	0	0	0	0.0852814	0	0.0856259	0	0.0939691	0.0998352	0	0		0	0	0	0.265417	0	0.0901004	0.375675	0	0	0	0	0
ENSMUSG00000089976	0	0	0	0	0	0	0	0	0	0	0	0		0	0	0	0	0	0	0	0	0	0	0	0
ENSMUSG00000101279	0.227177	0	0.0779363	0	0.222297	0.147758	0.0743983	0	0.0816475	0.0867444	0	0		0	0.0819355	0	0.307486	0.153995	0.626288	0.0816037	0	0	0	0	0
ENSMUSG00000089844	0.0327845	0	0	0.157415	0.128321	0.319851	0.0966296	0.139323	0.247438	0.07511	0.0371556	0.149717		0.0351026	0	0.0713473	0.432648	0.0666702	0.372823	0.247305	0.230289	0.185745	0.0400887	0.0804279	0.19221
ENSMUSG00000073631	0	0	0	0	0	0	0	0	0	0	0	0		0	0	0	0	0	0	0	0	0	0	0	0
ENSMUSG00000072109	0.0226232	0.0232384	0	0	0.0442744	0	0.0222266	0.0240352	0	0	0.0512789	0		0	0	0.0492337	0.0229655	0.0460062	0.0467762	0.0243792	0	0.0256349	0.0276634	0	0
ENSMUSG00000090128	0	0	0	0	0	0	0	0	0	0	0	0		0	0	0	0	0	0	0	0	0	0	0	0
ENSMUSG00000091199	0	0	0	0	0	0	0	0	0	0	0	0		0	0	0	0	0	0	0	0	0	0	0	0
ENSMUSG00000089716	0	0	0	0	0	0	0.0350288	0	0	0	0	0		0	0	0	0	0	0	0	0	0	0	0	0
ENSMUSG00000079457	0.0210551	0.0216277	0	0.101096	0	0	0	0	0	0	0	0.0240381		0.0225439	0.0227817	0	0.0213737	0.0856349	0.021767	0	0.0246497	0	0	0	0
ENSMUSG00000090252	0	0	0	0	0	0	0	0	0	0	0	0		0	0	0	0	0	0	0	0	0	0	0	0
ENSMUSG00000079455	0	0	0	0	0.0128401	0	0	0	0	0	0	0		0	0	0	0	0.0133424	0.0135657	0	0.0153622	0	0	0	0
ENSMUSG00000089652	0	0	0	0	0	0	0	0	0	0	0	0		0	0	0.0235814	0	0	0	0	0	0	0	0	0
ENSMUSG00000089937	0	0	0	0	0	0	0	0	0	0	0	0		0	0	0	0	0	0	0	0	0	0	0	0
ENSMUSG00000096292	0	0	0	0	0	0	0	0	0	0	0	0		0	0	0	0	0	0	0	0	0	0	0	0
ENSMUSG00000101751	0	0	0	0	0	0	0	0	0	0	0	0		0	0	0	0	0.060654	0	0	0	0	0	0	0
ENSMUSG00000089714	0	0	0	0	0	0	0	0	0	0	0	0.0249476		0	0	0	0	0	0	0	0	0	0	0	0
ENSMUSG00000090186	0	0	0	0	0	0.0817737	0	0	0	0	0	0		0	0	0	0	0	0	0	0	0	0	0	0
ENSMUSG00000094127	0	0	0	0	0	0	0	0	0	0	0	0		0	0	0	0	0	0	0	0	0	0	0	0
ENSMUSG00000070034	0.317755	0.191061	0.17548	1.33219	1.28164	0.650258	0.631985	0.559903	0.493016	0.355114	0.298637	0.42471		0.207453	0.184485	0.202395	1.18011	0.606781	1.2499	0.53451	0.417369	0.447875	0.161105	0.313712	0.318064
ENSMUSG00000090103	0	0	0	0	0	0	0	0	0	0	0	0		0	0	0	0	0	0	0	0	0	0	0	0
ENSMUSG00000070031	0.915898	0.40552	0.715103	1.60743	1.51431	1.01681	1.05499	1.0234	0.629972	0.795922	0.894839	1.02763		0.794672	0.478417	0.670135	2.43661	0.915222	1.32235	1.20822	0.905877	0.80521	0.463429	0.600466	0.777689
ENSMUSG00000073628	0	0	0	0.0477908	0	0	0	0	0	0	0	0.0568173		0	0	0	0.101039	0	0.0514494	0	0	0	0	0	0
ENSMUSG00000090246	0.0218518	0.0224461	0	0	0.0213824	0	0.0214688	0	0.0235607	0	0	0.0249476		0.0233969	0	0	0.0221825	0.0222188	0	0.023548	0.0255824	0.0247608	0	0	0
ENSMUSG00000026222	4.23573	2.75058	3.32143	14.7073	14.8367	7.47775	6.00647	5.43116	4.78444	4.46963	4.49305	4.3435		2.90433	2.62643	3.30728	13.196	8.16111	13.8631	5.89864	4.62501	4.24793	2.52592	2.83241	3.09907
ENSMUSG00000064414	0	0	0	0	0	0	0	0	0	0	0	0		0	0	0	0	0	0	0	0	0	0	0	0
ENSMUSG00000052760	0.931183	1.11592	0.9384	5.55157	4.3281	2.30904	3.64038	3.25646	3.05384	3.4667	2.68231	3.52154		1.12165	1.1125	1.07657	3.66293	2.84046	3.249	2.86405	2.49827	2.76976	1.6368	1.49914	1.81979
ENSMUSG00000098634	0	0	0	0	0	0	0	0	0	0	0	0		0	0	0	0	0	0	0	0	0	1.012	0	0
ENSMUSG00000094834	0	0	0	0	0	0	0	0	0	0	0	0		0	0	0	0	0	0	0	0	0	0	0	0
ENSMUSG00000100217	0	0	0	0	0	0	0	0	0	0	0	0		0	0	0	0	0	0	0	0	0	0	0	0
ENSMUSG00000092932	0	0	0	0	0	0	0	0	0	0	0	0		0	0	0	0	0	0	0	0	0	0	0	0
ENSMUSG00000036707	13.7381	13.6845	13.4054	18.3841	17.2433	16.1778	16.3937	15.6291	14.316	14.8013	14.8123	14.5483		16.0929	17.6045	15.6355	19.8032	19.5865	18.7397	15.2206	15.0837	15.3734	14.2018	16.7329	16.4397
ENSMUSG00000026223	39.8741	40.6551	38.4325	35.6977	35.8177	34.7234	48.9171	44.9405	38.1471	53.313	53.1525	55.5431		46.3529	45.2897	37.557	40.7773	40.8226	41.3531	54.7687	48.4351	52.2346	58.793	52.1449	57.5161
ENSMUSG00000026224	0	0	0	0	0	0.0460115	0.0308899	0.0334034	0	0	0.0356329	0.053843		0	0.0510289	0	0.0319168	0.0479535	0	0.0338815	0.055213	0.0178133	0.0192229	0.0578489	0
ENSMUSG00000099767	0	0	0	0	0	0	0	0	0	0.0150728	0	0		0	0	0.0143177	0	0.0133791	0.013603	0.0141795	0.0154045	0	0.0321793	0	0
ENSMUSG00000049608	0.0141235	0	0.0145358	0.122065	0.110561	0.0413374	0.0277519	0.0300101	0.030456	0.145608	0.0960394	0.177369		0.0604886	0	0	0.186384	0.315935	0.146011	0.0456595	0.0330694	0.0320074	0.0345402	0.0866205	0.149047
ENSMUSG00000100108	0	0	0	0	0	0	0	0.0959344	0	0	0	0		0	0	0	0	0	0	0	0	0	0	0	0
ENSMUSG00000099342	0	0.10913	0.40092	0.13603	0.103958	0.0690999	0.0347927	0.0752478	0.0381829	0.202832	0.0802702	0.283014		0.113752	0.0766351	0	0.143797	0.0720164	0.0366109	0.114487	0	0.120384	0.433033	0.0434387	0
ENSMUSG00000026226	0.0197125	0	0	0	0	0	0	0	0	0	0	0		0.0211063	0	0	0	0	0	0	0	0	0	0	0
ENSMUSG00000026227	0.0157771	0	0	0.0151507	0	0.0153924	0.0155006	0.0167619	0.153098	0.0361457	0.0178807	0.0720493		0.0168927	0.0170709	0.0171675	0	0.0481262	0	0.18702	0.0184706	0.0893873	0.0578764	0.0387049	0.0369995
ENSMUSG00000026229	12.4566	12.0077	12.5076	17.4707	18.5808	16.3803	14.3135	12.5809	11.6915	12.8936	12.4122	12.9661		12.6403	11.9832	11.4134	19.0998	19.4694	17.6939	12.7765	13.1266	12.9346	13.3035	14.33	13.2915
ENSMUSG00000077274	0.430767	1.76993	0.443343	1.24099	0	0.420263	0	0.457654	1.39336	1.48034	0.976401	0.983591		1.8449	1.39828	0.468729	1.74914	0.876002	0.445332	0.928409	0.504309	1.95245	0	2.64192	1.01021
ENSMUSG00000026228	0.567214	0.101329	0.203051	1.01834	0.69982	0.986465	9.9582	7.25761	2.73878	4.68949	3.91294	5.06796		0.55451	0.133419	0.0536695	0.726005	0.827495	0.662878	0.797273	0.548563	1.08984	0.814208	0.695752	0.52051
ENSMUSG00000103272	1.17701	1.35007	1.39308	1.75194	1.57403	1.35884	1.63821	2.14665	1.79783	1.68535	2.15654	1.65731		1.34425	1.59192	1.28074	1.99137	1.87495	2.04829	1.16268	1.86024	1.9561	1.67912	1.87686	1.49514
ENSMUSG00000094638	0	0	0.0697008	0	0	0	0	0	0	0	0	0		0	0	0	0	0	0	0	0	0	0	0	0
ENSMUSG00000062590	0.921284	1.05425	0.964814	0.869186	0.98848	0.867282	1.52047	1.50253	1.35058	1.50432	1.25477	1.3286		1.02536	1.00558	1.01566	0.890105	1.09288	1.09864	1.37163	1.68408	1.46516	1.45264	1.40762	1.35033
ENSMUSG00000087538	0	0	0.143469	0	0	0.136	0	0	0.150301	0	0	0		0.149256	0.150831	0	0.566036	0.14174	0.144113	0	0	0	0	0	0.163455
ENSMUSG00000079445	0.0635166	0.0130488	0.0130742	0.47576	0.397774	0.458561	2.10923	1.45759	0.725927	1.06228	0.9646	1.23276		0.0544061	0.013745	0.069114	0.644777	0.710415	0.643509	0.520196	0.461034	0.403044	0.295137	0.264895	0.193641
ENSMUSG00000099644	0	0	0	0	0	0	0	0.107373	0	0	0	0		0	0	0	0	0	0	0	0	0	0	0	0
ENSMUSG00000091806	0	0	0	0	0.157262	0	0	0	0	0	0	0		0.172078	0	0	0	0	0	0	0	0	0	0	0
ENSMUSG00000101853	0	0	0	0	0	0	0	0	0	0	0	0		0	0	0	0	0	0	0	0	0	0	0	0
ENSMUSG00000026234	11.5393	12.934	12.2159	21.6174	21.7399	19.149	15.0265	14.4736	14.405	14.8906	15.808	15.9479		12.3939	12.9098	13.2578	22.1763	21.5989	20.8779	16.3206	19.0532	18.7686	19.7618	20.0956	18.4299
ENSMUSG00000064837	0	0	0	0	0	0	0	0	0	0	0	0		0	0	0	0	0	0	0	0	0	0	0	0
ENSMUSG00000104627	0.357508	0	0.367944	1.37325	1.04948	2.09274	2.45869	1.51929	0.385465	0.409528	1.21552	0.816314		0.382786	0.773649	1.16704	0.362917	0.363511	0.739191	1.15577	1.25563	1.2153	0.874315	0.877047	1.2576
ENSMUSG00000064696	0	0	0	0	0	0	0	0	0	0	0	0		0	0	0	0	0	0	0	0	0	0	0	0
ENSMUSG00000064823	6.00613	3.85592	0.772683	4.32575	2.93855	9.52196	3.68803	3.19051	5.66634	2.58003	5.95605	4.28565		2.41155	6.49866	3.26771	6.85914	8.39711	6.98535	1.61808	5.27363	2.55213	5.50818	6.4463	4.40161
ENSMUSG00000073627	0.351065	0.427703	0.411729	0.376328	0.463357	0.469948	0.513357	0.719933	0.519363	0.570489	0.536664	0.633826		0.568202	0.441691	0.586329	0.381241	0.47318	0.48954	0.413508	0.544813	0.693838	0.758726	0.851228	0.583964
ENSMUSG00000110510	0	0	0.0459539	0	0	0	0	0	0	0	0	0		0	0	0	0	0	0	0	0	0	0	0	0
ENSMUSG00000026237	0.0930152	0.0318483	0.0319102	0.0297741	0	0	0.0609232	0.131761	0.0334297	0	0	0		0	0	0	0	0	0	0.100235	0	0.0702652	0.0758255	0.0380313	0.0363555
ENSMUSG00000036574	0	0	0	0	0	0	0.0299492	0.0323862	0.0657348	0.0349192	0	0		0.0326389	0	0	0	0	0.0315142	0	0	0.0345416	0.07455	0.0373915	0.035744
ENSMUSG00000101328	0	0	0.155425	0.290041	0	0.147334	0.296738	0	0	0.17299	0.171151	0		0.161694	0.1634	0	0.153301	0	0.156122	0	0	0	0.184661	0.370477	0
ENSMUSG00000026238	8.66308	8.30789	8.21306	14.4981	15.3711	13.2564	17.8347	14.9323	15.5805	11.2825	15.1142	14.1174		10.0839	9.2957	8.64423	18.7195	16.8861	19.1755	16.9279	17.5908	19.9178	20.3951	19.7534	23.688
ENSMUSG00000026239	7.33531	7.0143	6.72993	5.09769	4.7458	6.12064	5.00204	4.81945	4.55284	6.10851	6.0709	5.45446		5.58045	5.82209	6.06506	3.69866	4.36714	5.58771	4.23837	4.57629	3.93718	4.6323	3.93644	3.93276
ENSMUSG00000102927	0	0	0	0	0	0	0	0	0	0	0.0506898	0		0	0	0	0	0	0	0	0	0	0.0546912	0.0548621	0
ENSMUSG00000026240	3.25899	3.59233	3.16779	3.23941	3.67386	2.86343	3.39847	3.19918	3.0104	3.35115	2.90513	3.02443		2.79562	3.0004	3.21438	3.21157	2.84864	2.82735	2.444	3.10138	3.01258	3.1228	3.23776	2.72637
ENSMUSG00000084468	0	0	0	0	0	0	0	0	0	0	0	1.05262		0	0	0	0	0	0	0	0	0	0	0	0
ENSMUSG00000103609	0.48963	0.502946	0.455931	0.17912	0.136889	0.0682415	0.114535	0.074313	0.0754171	0.0801251	0.0264243	0.0266189		0.3495	0.378416	0.685001	0.0710056	0.142244	0.12052	0.100502	0.0818887	0.132098	0.0285103	0.0285994	0
ENSMUSG00000026241	0.151306	0.207228	0.259538	1.54985	0.592223	1.52537	0.545064	0.428667	0.489415	0.519967	0.400118	0.287903		0.162004	0.327427	0.0548799	2.15034	0.974364	0.469265	0.271751	0.41332	0.571495	2.28186	2.66018	1.41933
ENSMUSG00000053333	4.10935	4.07555	3.76141	4.00857	3.89975	3.9573	6.2068	6.24767	5.83758	5.90441	5.91523	5.45324		4.58324	4.58049	4.71562	4.03368	4.39448	4.14453	5.05186	6.10349	5.63987	6.46881	6.06174	6.25157
ENSMUSG00000100225	0	0	0	0	0	0	0	0.132308	0	0	0	0		0	0	0	0	0	0	0	0	0	0	0	0
ENSMUSG00000100768	0.645395	0.473534	0.347933	0.324642	0.481167	0.23987	0.603888	0.391816	0.331365	0.35205	0.731444	0.456133		0.42778	0.332534	0.334415	0.34318	0.249994	0.476583	0.463662	0.323819	0.31342	0.676443	0.301581	0.360366
ENSMUSG00000104121	0.961021	1.27965	1.09897	0.871596	0.957791	0.850773	1.36381	1.68277	1.11293	1.24356	1.00847	1.19876		1.25763	1.00132	1.22	0.632309	0.832395	0.69914	0.920549	1.58346	1.31078	1.26218	0.742208	1.10599
ENSMUSG00000102383	0.546972	0.880732	0.654226	0.724001	0.622015	0.576901	1.01667	1.05228	0.765075	0.863638	0.8377	0.894501		0.633131	0.703793	0.675602	0.630282	0.721501	0.641879	0.669081	1.07302	0.938056	0.867674	0.979184	0.797367
ENSMUSG00000104400	1.09487	0.853177	1.51539	0.88825	0.775804	1.01292	1.76188	2.14591	1.64861	1.44879	1.30502	1.89652		1.63715	1.2255	1.25297	0.900645	1.20922	1.05382	1.28156	1.72378	1.77537	1.84661	2.03762	2.03638
ENSMUSG00000102293	0.476728	0.396418	0.584101	0.523201	0.42206	0.376512	0.825227	0.723549	0.489533	0.546096	0.463105	0.622021		0.315984	0.638637	0.617547	0.299583	0.369321	0.63366	0.56266	0.691001	0.82315	0.749494	0.72399	0.612233
ENSMUSG00000102649	1.48228	1.24576	1.90694	1.13228	1.4834	1.34754	2.9457	2.57695	2.21568	1.92951	2.13807	1.84613		2.12814	1.53093	1.83285	1.12853	1.47292	1.67171	1.88777	2.40581	2.51941	3.04833	3.1405	2.05409
ENSMUSG00000084106	0.0589827	0.121174	0.0607046	0.226564	0.0577157	0	0	0.0626643	0	0	0.0668468	0.067339		0	0	0.0641806	0	0.0599732	0	0	0	0	0.0721236	0.072349	0.0691612
ENSMUSG00000102571	0.611318	0.486149	0.527686	0.340866	0.482408	0.519455	1.06558	1.15229	0.871745	0.813217	0.581078	0.990604		0.738999	0.597437	0.600817	0.36033	0.56143	0.48928	0.701271	1.15433	1.11726	1.03687	1.23363	1.13302
ENSMUSG00000099401	0	0	0	0	0	0	0	0	0	0	0	0		0	0	0	0	0	0	0.131705	0	0	0	0	0
ENSMUSG00000102956	0.140706	0.144532	0.144813	0.135119	0.0688416	0	0.138239	0.149488	0.303418	0.322359	0.318932	0.32128		0.150655	0.228366	0.229658	0	0	0.145463	0.151628	0	0.159437	0.258081	0.345183	0.164987
ENSMUSG00000103984	1.18461	1.41963	1.45934	1.10311	1.33479	1.15572	2.31006	1.94503	1.68365	2.26164	2.25793	2.09013		1.71038	1.84495	1.89444	1.09321	1.44175	1.31744	1.76011	2.37445	2.09482	2.83122	2.64192	2.02041
ENSMUSG00000101940	0	0.0260158	0.130332	0.80261	0.91697	0.716574	0.149299	0.215263	0.081923	0.0870371	0.0861115	0.0289152		0.352532	0.356252	0.192913	0.282813	0.746818	0.261834	0.54586	0.444764	0.516576	0.402606	0.683463	0.296976
ENSMUSG00000101625	0	0	0	0	0	0	0	0	0	0	0	0		0	0	0	0	0	0	0	0	0	0	0	0
ENSMUSG00000026246	0	0	0	0	0	0	0	0	0	0	0	0		0	0	0	0	0	0	0	0	0	0	0	0
ENSMUSG00000079440	0	0	0	0.0215948	0	0	0	0	0	0	0	0		0	0	0	0	0	0	0	0	0	0	0	0
ENSMUSG00000100940	0	0	0	0	0	0	0	0	0	0	0	0		0	0	0	0	0	0	0	0	0	0	0	0
ENSMUSG00000036500	0	0	0	0	0.0244996	0	0	0	0	0	0	0		0	0	0	0	0	0	0	0	0	0	0	0
ENSMUSG00000099839	0	0	0	0.037662	0	0.114788	0	0	0	0	0	0		0	0.127306	0	0.0398126	0	0.0405452	0	0.0459147	0.0444401	0	0.0481067	0
ENSMUSG00000026247	0.0600613	0.0308473	0	1.25447	1.8219	2.19738	0.147521	0.0478576	0.0323791	0.0516005	0.0340346	0.0171426		0.675234	1.05603	0.359448	0.792612	0.931316	0.698535	0.404521	0.228524	0.272228	0.422294	0.810392	0.24649
ENSMUSG00000036480	0	0	0	0.1389	0.141536	0.188155	0	0	0	0	0.0273213	0		0	0	0	0.024472	0	0	0	0	0.0273164	0	0	0
ENSMUSG00000026251	0	0	0	0.0767444	0	0	0	0	0	0	0	0		0	0	0	0	0	0	0.0688965	0.0187122	0.0181112	0	0	0
ENSMUSG00000026253	0	0	0.0129925	0	0	0.0123161	0.0124027	0	0.0544448	0	0	0		0	0	0	0	0	0	0.0680194	0	0.0143045	0	0	0
ENSMUSG00000026254	6.34401	6.1061	6.61578	8.46167	7.93629	7.31091	9.14604	8.99657	7.83024	8.6563	8.46891	8.17114		7.13032	6.80356	7.09376	8.96619	9.13055	8.43547	8.36992	9.3064	8.68981	9.40317	9.24339	9.18955
ENSMUSG00000088318	0	0.534483	0.535523	1.49902	0.509155	0	0.511212	1.10562	0	0	0.589708	0.59405		0.557124	0	0	1.05641	0	0	0.560722	0.609165	0	0	0	0
ENSMUSG00000026255	47.459	46.6666	48.4372	28.3566	30.0804	40.9453	42.2536	51.262	44.6908	49.0104	45.0417	47.8016		50.2057	53.0902	53.848	35.3985	32.0617	33.7744	20.9475	18.8196	21.3258	26.0375	26.8166	25.432
ENSMUSG00000089821	0.316588	0	0.162915	0	0	0	0	0	0.170673	0	0	0.18072		0	0.171275	0	0	0	0	0	0	0	0	0	0
ENSMUSG00000048000	6.63205	6.72887	6.64683	6.82314	6.83323	6.1818	7.84874	8.15749	7.19852	7.3811	7.89335	7.4408		6.99411	7.1879	6.9148	6.68362	7.02533	7.21935	8.01132	8.62987	8.47001	8.90973	8.797	8.30102
ENSMUSG00000095281	0	0	0	0	0	0	0	0	0	0	0	0		0	0	0	0	0	0	0	0	0	0	0	0
ENSMUSG00000079436	6.00022	12.1568	6.94198	2.98034	2.79394	2.50305	4.91931	3.47313	4.90785	6.58889	13.5066	6.80304		8.94996	9.80555	6.57401	1.55426	3.1136	3.08016	2.89854	3.14895	3.98562	7.23581	9.69482	8.63687
ENSMUSG00000089613	0	0	0	0	0	0	0	0	0	0	0	0		0	0	0	0	0	0	0	0	0	0	0	0
ENSMUSG00000026258	0	0	0.0749138	0	0	0	0	0	0	0	0.0824937	0		0	0	0	0	0	0	0	0	0.0824789	0	0	0
ENSMUSG00000026259	0.174954	0.235008	0.0969564	0.568644	0.50042	0.249467	0.251221	0.0857882	0.217657	0.308326	0.701609	0.107553		0.187325	0.189301	0.102508	0.368865	0.314733	0.32	0.493091	0.330868	0.259244	0.164564	0.313648	0.0631217
ENSMUSG00000079434	0	0	0.0417666	0.0194854	0.198551	0.0395924	0.0199353	0.0215575	0.1969	0.046487	0.0229963	0		0.108628	0.0658648	0	0.10299	0.12379	0.104885	0.087464	0.0237551	0.0689766	0	0	0.0237925
ENSMUSG00000091123	0	0	0	0	0	0	0	0	0	0	0	0		0	0	0	0	0	0	0	0	0	0	0	0
ENSMUSG00000090994	0	0	0.102245	0.095401	0	0	0	0	0	0	0	0.0567099		0	0	0.05405	0	0	0	0.0535283	0	0	0.0607393	0.0609291	0
ENSMUSG00000026288	3.41509	2.84045	2.72502	19.3915	16.6072	8.62629	12.4904	11.7294	7.52829	9.30489	8.75152	9.63679		3.54553	3.44082	3.21204	14.3864	13.0884	11.1634	8.72365	6.5718	7.41826	5.30868	5.39311	5.92556
ENSMUSG00000026289	5.27829	5.1471	5.20766	6.14328	5.9821	5.78329	6.02235	5.93829	6.30901	5.865	5.56137	5.62102		5.36512	5.64026	5.46428	6.66029	6.59904	6.56842	5.73506	6.21775	6.07992	7.095	6.48781	5.84352
ENSMUSG00000087968	35.3578	24.8083	38.3785	31.913	35.7326	31.6681	45.1784	50.2915	49.9971	41.3879	34.3787	60.2197		37.0303	29.686	41.417	25.4976	30.6472	42.5456	72.0405	53.835	73.9994	92.6131	78.4457	189.852
ENSMUSG00000089281	12.8905	9.77802	17.1448	12.7596	9.31466	7.15875	13.0542	11.7989	10.2636	14.539	16.632	22.1883		14.2266	15.0205	16.4002	9.46187	10.2839	10.8661	15.1734	14.6269	17.7526	27.4023	26.2717	58.5996
ENSMUSG00000056055	0.100338	0.115192	0.157938	0.192709	0.132836	0.0863749	0.104378	0.169307	0.152732	0.108177	0.107027	0.107815		0.139031	0.121339	0.122025	0.125823	0.198045	0.207462	0.0954059	0.0898286	0.127072	0.180431	0.202714	0.131495
ENSMUSG00000070738	12.7049	12.6564	12.8705	15.3022	13.7158	11.9685	14.0425	13.7017	13.3097	14.1142	14.451	14.5049		12.9707	13.5808	13.3487	15.4128	16.0386	15.3394	14.0301	15.3769	15.0483	15.2822	14.6242	12.9273
ENSMUSG00000101942	0	0	0	0	0	0.121931	0	0.0663898	0	0	0	0.142685		0	0	0	0	0	0	0.13468	0.0731578	0	0.0764116	0	0
ENSMUSG00000103996	1.30761	1.53506	1.40987	1.79385	1.52324	1.15423	1.46822	2.18308	1.34273	1.64054	0.98797	0.853067		0.53336	1.07798	1.76162	1.45382	2.21595	1.67369	2.08012	3.1346	2.32837	1.21824	1.83307	1.09519
ENSMUSG00000103591	1.43983	1.65935	2.13243	1.95596	2.04462	2.1242	2.58766	2.55571	1.79854	2.6148	1.87059	2.32539		1.95524	2.26085	1.94883	2.44196	2.48167	2.57766	3.19778	2.93958	2.96456	2.70532	2.47686	2.16184
ENSMUSG00000005501	4.71482	4.36101	4.94358	4.73594	4.90811	4.69055	5.2498	4.88211	4.463	5.31465	5.04239	4.76111		4.79696	4.76615	4.61005	5.14569	4.73998	4.94746	4.88042	5.38499	5.01641	4.70422	4.43655	4.26183
ENSMUSG00000095942	0	0	0	0	0	0	0	0	0	0	0	0		0	0	0	0	0	0	0	0	0	0	0	0
ENSMUSG00000084021	0	0	0	0	0	0.0324097	0	0	0	0	0	0		0.0355686	0	0	0	0	0	0	0.0388911	0	0	0	0.0389523
ENSMUSG00000083478	0	0	0	0	0	0	0.121631	0	0	0	0	0		0	0	0	0	0	0	0	0	0	0	0	0
ENSMUSG00000090165	0	0	0	0.200355	0.0453681	0.0226167	0.0227757	0.0492579	0	0	0.0262728	0		0	0	0	0.0941312	0.0942852	0.0239658	0.0249815	0	0	0	0.0568707	0
ENSMUSG00000092220	0	0	0	0.332646	0.096845	0.0482788	0.388945	0.157723	0.213421	0.113372	0.0560833	0.338978		0.0529845	0.107087	0.269232	0.301406	0.402532	0.102317	0.0533267	0	0	0.0605105	0.182099	0.058025
ENSMUSG00000090175	0.0719913	0.0739491	0.148186	0.16131	0.0469632	0.0234119	0	0.0254949	0.0258737	0.0274889	0	0.191778		0.205551	0.0259649	0.104447	0	0.0732002	0.124042	0	0.0280939	0.0543834	0.117374	0	0
ENSMUSG00000089675	0.0943936	0.0727205	0	0.045323	0.0461829	0.0460459	0	0.0250713	0.0254438	0.0540643	0.0534894	0		0.126335	0	0.025678	0.047911	0.0479894	0.0243963	0	0	0	0	0	0
ENSMUSG00000090124	0.572995	0.409445	0.423062	4.41393	2.96189	1.1545	2.21509	2.15713	1.30276	1.58385	1.53877	2.04785		0.346766	0.363903	0.365962	2.30137	2.16582	1.66121	1.5571	1.32705	1.03037	1.18807	1.19178	1.24151
ENSMUSG00000082837	0	0	0	2.5941	2.16272	0.239589	2.41273	1.30453	1.32391	0.843934	0.55664	0.280369		0.525883	0	0	0	1.99761	1.01552	1.05856	0.287503	0.27827	1.20116	0.602458	0
ENSMUSG00000090145	0.882512	0.430593	1.47595	1.86444	1.59758	0.774893	1.27889	1.21887	0.689857	0.960379	0.925163	0.906787		0.803175	0.668418	0.816241	1.50058	1.25627	0.798307	1.14122	0.516588	0.649998	0.674456	0.405938	0.595012
ENSMUSG00000084195	1.13425	0.841459	1.62134	4.84097	4.37788	1.16807	2.35256	1.67368	1.29089	1.94894	1.57114	2.01436		1.07951	1.15908	0.617103	2.5587	2.56288	2.47549	2.24087	1.62298	1.07104	0.616423	0.695644	1.55165
ENSMUSG00000081261	0.207722	0	0	0.797899	0.406519	0.405313	0	0.220687	0.447932	0.713841	0	0.474301		0	0	0.452054	0.210865	0	0.42949	0.223846	0.243184	0.235375	0	0	0.243568
ENSMUSG00000054545	0.341257	0.250384	0.413937	1.10016	0.846742	0.332936	0.61068	0.556785	0.499353	0.265263	0.621573	0.584407		0.430634	0.316493	0.411116	0.68047	0.656799	0.415795	0.538486	0.356712	0.400497	0.223546	0.254144	0.400147
ENSMUSG00000081602	1.46723	1.91817	2.33374	5.8921	4.6987	1.17119	3.27617	2.26736	2.01342	3.05587	1.81402	1.97966		1.28534	1.8762	1.74167	4.1975	3.11937	2.4821	2.15608	2.34235	1.51142	1.14171	0.98167	0.62561
ENSMUSG00000082513	2.11709	1.85486	2.5634	7.77337	6.21483	2.42996	3.7929	3.90308	3.2897	2.63913	2.46992	4.12316		2.06677	1.2801	1.28734	4.86713	3.67215	3.47612	2.54983	2.40562	1.97559	1.21824	1.29842	0.876151
ENSMUSG00000082677	0.804392	0.757412	1.51777	4.95659	3.21404	1.50416	2.43673	1.56677	2.02369	2.53396	1.5194	2.06629		1.2919	1.233	0.875279	2.99407	2.11291	1.87108	1.37248	1.0202	1.67104	1.55737	1.48002	1.0218
ENSMUSG00000089943	0.620242	0.367563	0.761108	2.26793	1.28387	0.768034	0.96093	1.03912	1.05456	1.36633	1.18959	1.03494		0.613013	0.387176	0.597028	1.33191	1.01876	1.33175	0.951166	0.586491	0.946093	0.525065	0.731536	0.671331
ENSMUSG00000081488	1.16377	0.566253	1.44991	4.17618	3.47626	1.31467	2.34693	1.56179	1.65103	1.47344	1.38836	1.95801		1.50839	1.12666	0.999736	1.74099	2.36664	1.96299	0.858075	1.14733	1.87394	1.19836	1.35237	0.933676
ENSMUSG00000083277	2.14779	0.896267	1.31248	4.44729	3.74356	2.22638	2.24202	1.35484	1.66444	1.76835	1.29314	1.83905		1.58101	0.944089	1.16853	2.38469	3.27578	2.49795	1.95286	0.942922	1.67317	1.06693	0.987938	1.96752
ENSMUSG00000090171	0.546691	0.21974	0.391409	1.32388	0.953601	0.602929	0.513756	0.656572	0.666327	0.517328	0.484888	0.732689		0.534446	0.257183	0.258638	0.651479	0.483366	0.663466	0.717197	0.389579	0.511735	0.261583	0.349867	0.473806
ENSMUSG00000081984	0.750052	0.821813	1.18365	0.432164	0.831798	0.585409	0.589524	0.743743	0.646966	1.08831	1.19008	0.799226		1.07078	0.757455	0.87056	0.20304	0.508431	0.310165	0.969927	0.761022	0.963222	0.428007	0.674684	0.762221
ENSMUSG00000089960	0.378084	0.194183	0.21888	1.08922	1.10989	0.530242	0.812561	0.502103	0.28026	0.649647	0.482054	0.67445		0.48072	0.153408	0.231414	0.839573	0.64873	0.684017	0.356502	0.359637	0.294536	0.288948	0.173911	0.27708
ENSMUSG00000079429	0.030943	0.0063569	0.0127385	0.101029	0.175614	0.0483016	0.0364808	0.0854734	0.0733982	0.0141782	0.049096	0.0635883		0.0331309	0.0200883	0.0202019	0.11308	0.113266	0.0767742	0.0533518	0.0579611	0.0350623	0.0681064	0.0455461	0.0290262
ENSMUSG00000044783	15.8336	16.0568	16.2309	19.4938	20.0242	18.0877	18.8098	19.5831	19.4727	18.217	18.6238	15.1096		16.2237	16.5996	16.7484	14.8565	20.4675	20.8557	17.7764	19.4377	18.5633	18.8675	18.3384	16.1546
ENSMUSG00000036251	0.033318	0.0342241	0.0228604	0	0.0108674	0	0	0	0	0	0	0		0	0.0120167	0	0.0112741	0	0	0.0119681	0	0	0	0	0
ENSMUSG00000085420	0	0	0	0	0	0	0	0	0	0	0	0		0	0	0	0	0	0	0	0	0	0	0	0
ENSMUSG00000026295	0	0	0	0	0.0518394	0	0	0	0	0	0	0		0	0	0	0	0	0.0547687	0	0	0	0.0647804	0	0
ENSMUSG00000099553	0	0	0	0	0	0	0	0	0	0	0.126455	0		0	0	0	0	0	0	0	0	0.126433	0	0	0
ENSMUSG00000100908	0	0	0	0	0	0	0	0	0	0	0	0		0	0	0	0	0	0	0	0	0	0	0	0
ENSMUSG00000062310	0	0	0	0	0.0788319	0	0	0.0285303	0	0.0307617	0	0		0	0	0	0.0272605	0.0546103	0.0277621	0.0289387	0	0	0	0	0.0314883
ENSMUSG00000100798	0	0	0	0.0192402	0.0392106	0	0.0196845	0	0	0	0	0		0	0	0	0.0203389	0.0407443	0	0	0	0	0	0	0
ENSMUSG00000104057	0	0	0	0.0286582	0.029202	0	0.17592	0.0951173	0.0965305	0.068371	0.033822	0.034071		0	0	0	0.0605893	0.0606884	0.0308521	0.0321595	0.104814	0.0338159	0.0364918	0.0366059	0.034993
ENSMUSG00000100367	0	0	0	0.0880752	0.179493	0	0.270327	0	0.098889	0	0	0.314131		0	0	0	0.0931045	0	0	0	0.107375	0	0	0	0
ENSMUSG00000049866	0.822944	0.491468	0.659847	5.59623	6.30168	2.67003	13.1619	11.8235	8.35713	6.26999	4.99952	6.87171		1.06556	0.714414	0.926703	6.2072	4.95248	4.3132	6.73367	5.2541	6.47327	3.63902	3.7443	3.64664
ENSMUSG00000101736	0.114496	0.11761	0	0	0	0	0	0.121642	0	0	0.129761	0		0	0	0	0	0.232837	0	0	0	0	0	0	0
ENSMUSG00000097398	0	0	0	0	0	0	0	0	0	0	0	0		0	0	0	0	0	0	0	0	0	0	0	0
ENSMUSG00000099848	0	0	0	0	0	0	0	0	0	0	0	0		0	0	0	0	0	0	0	0	0	0	0	0
ENSMUSG00000101333	0	0	0	0	0	0	0	0	0	0	0	0		0	0	0	0	0.0425786	0	0	0	0	0	0	0
ENSMUSG00000099378	0	0	0	0	0.0852814	0	0	0	0	0	0	0		0	0	0	0.0884724	0	0	0	0	0	0	0	0
ENSMUSG00000099544	0	0	0	0	0	0	0	0	0	0	0	0		0	0	0	0	0	0	0	0	0	0	0	0
ENSMUSG00000036206	4.81125	5.11105	5.18447	3.62313	4.39605	4.59363	3.47448	3.6043	4.05689	4.98139	7.50331	4.71824		6.57138	5.8732	4.72066	3.85089	4.67253	5.11208	5.83833	4.32076	4.83434	4.56321	4.70358	4.38784
ENSMUSG00000102700	0	0.030918	0	0.0289044	0	0	0	0.0319781	0	0	0	0		0	0	0	0	0	0	0	0	0	0.0368053	0	0
ENSMUSG00000102083	0.065692	0	0.135219	0	0	0	0	0	0	0	0	0		0	0	0.0714811	0	0	0	0	0	0.0744372	0	0	0.0770282
ENSMUSG00000101288	0	0	0	0	0	0	0	0	0	0	0	0.101866		0	0	0	0	0	0	0	0	0	0	0	0
ENSMUSG00000099938	0	0	0	0	0	0	0	0	0	0	0	0		0	0	0	0	0	0	0	0	0	0.108735	0	0
ENSMUSG00000055013	8.946	9.16777	10.0234	7.80043	7.81665	8.01829	12.5383	12.1659	11.9658	14.3207	11.5125	12.1782		9.77723	9.94192	10.3727	8.10001	9.1297	8.3295	9.63718	9.70942	9.57056	10.6317	9.84989	9.11407
ENSMUSG00000104114	1.87377	2.85312	2.90404	1.7782	1.89823	1.84958	4.20163	4.59037	5.20524	4.97463	3.12293	4.12745		2.99758	2.50446	3.33419	2.66297	2.24145	2.30175	3.32576	5.3164	3.94667	5.20243	3.83966	2.61069
ENSMUSG00000088371	0.456988	0.469416	0.470329	0	0.447171	0.445844	0.448978	0	0.98545	0.523484	0.517917	1.04346		1.4679	0.494463	0.49726	1.39171	0.464662	0.944879	1.96984	1.60502	0.517824	0.558801	0.560548	0
ENSMUSG00000101662	1.26255	1.459	0.893342	1.97019	0.849357	0.923822	2.94599	2.51504	2.55241	2.44057	2.77233	3.1531		2.2812	1.19532	1.6314	2.08269	2.00586	1.30524	1.95579	2.03238	1.43063	2.12277	2.32299	1.758
ENSMUSG00000102009	0	0	0	0.0148739	0	0	0	0.0164556	0	0	0.0175539	0.0176832		0.016584	0	0.0168538	0	0.0314979	0.0160125	0	0	0	0	0.0189988	0
ENSMUSG00000088775	5.06948	4.86019	5.73922	5.03048	5.12593	4.61614	10.1273	8.43791	6.01251	6.00071	6.51143	5.98061		4.16141	3.47396	7.35497	6.00389	6.52918	4.7168	3.27779	5.53929	5.3614	4.95914	3.93825	6.34059
ENSMUSG00000103252	1.20783	1.18789	1.61338	1.35731	1.35791	1.00288	1.86836	2.37533	2.18895	2.5611	1.86399	2.61121		1.29324	1.16785	1.9015	1.35655	1.56781	1.30181	1.99392	2.07593	1.98014	2.29395	2.11199	2.47093
ENSMUSG00000034486	0	0.0247969	0	0.023182	0.0472436	0	0.0237172	0	0	0	0	0		0.0258473	0	0	0	0	0	0.0260142	0	0	0	0	0
ENSMUSG00000092627	0	0	0	0.0990522	0.0672878	0.016772	0.0168899	0	0.0185356	0	0.0389666	0.0392536		0	0.018601	0	0.0523541	0.0349599	0.035545	0.0185257	0.0805046	0	0	0	0.0201579
ENSMUSG00000067081	0.026596	0.0136596	0.0547447	0.02554	0.0260246	0.0259474	0.0261298	0	0.573516	0.015233	0.015071	0		0.128144	0.215827	0.0578794	0	0	0.0137476	0.0286604	0	0	0	0	0.0155928
ENSMUSG00000026301	0	0	0	0	0	0	0	0.0130514	0	0.0140721	0	0		0	0	0	0	0.0124909	0.0254	0	0	0	0	0	0
ENSMUSG00000100850	0	0	0	0	0	0	0	0	0	0.0590202	0.175178	0.0588226		0	0	0	0	0.0523884	0	0	0	0	0	0.126398	0
ENSMUSG00000044337	14.7552	16.656	15.6706	23.7563	24.8522	19.1428	11.0575	8.28836	13.0996	15.6975	19.0352	12.6521		18.5548	13.9441	15.2698	29.0646	21.5947	19.4571	20.806	13.0843	12.6285	14.6068	15.6729	14.6326
ENSMUSG00000104087	0	0	0	0	0	0	0	0	0	0.0440385	0	0		0	0	0	0	0	0	0	0	0	0	0	0
ENSMUSG00000101951	0	0	0	0	0	0	0.0562445	0.0608212	0.0617248	0	0	0		0.0612958	0	0	0	0.0582093	0	0	0	0	0	0	0
ENSMUSG00000101028	0	0.107858	0	0	0.0513733	0.153663	0	0.0557781	0.16982	0.0601405	0.119002	0.179817		0.112427	0.0568064	0	0.213182	0.0533828	0.162829	0.113153	0	0.0594903	0	0	0
ENSMUSG00000098368	0	0	0	0	0	0	0	0	0	0	0	0		0	0	0	0	0	0	0	0	0	0	0	0
ENSMUSG00000101997	0	0	0	0	0	0	0	0	0	0	0	0		0	0	0	0	0.0515793	0	0	0	0	0	0	0
ENSMUSG00000103292	0.168802	0.269721	0.212336	0.558344	0.458821	0.329371	0.165843	0.199264	0.303337	0.171879	0.170051	0.192716		0.140573	0.142057	0.163269	0.41887	0.324202	0.504138	0.323386	0.329367	0.191273	0.229344	0.253067	0.329885
ENSMUSG00000034432	9.31031	8.88386	8.92546	9.74623	10.6595	10.3397	8.70601	7.34326	7.38866	8.29653	8.15475	7.39197		9.42464	8.3096	8.29232	10.8905	11.0044	10.3458	8.4924	7.60772	8.19345	8.74069	8.56511	7.4396
ENSMUSG00000056128	0	0	0	0	0.0426054	0	0	0	0.0469456	0	0	0		0	0	0	0	0	0	0	0	0.049337	0.0532412	0.0534076	0
ENSMUSG00000048126	33.1936	32.8057	35.3155	54.7701	64.3421	58.4596	32.0162	38.4812	50.2596	46.8753	74.9348	41.9437		45.5405	33.5913	32.3186	60.4885	71.3703	66.8652	90.3012	57.149	59.3059	49.3502	56.7143	60.6542
ENSMUSG00000103061	0.706746	0.725966	0.872853	1.00446	1.35547	1.21354	0.58326	0.330378	0.609612	1.03627	0.961169	0.710048		0.998867	0.64235	0.707505	1.1766	1.26476	1.43206	1.64507	0.959787	0.480499	0.795067	0.728199	0.729262
ENSMUSG00000103978	0	0	0	0	0	0	0	0	0	0	0	0		0	0	0	0	0	0	0	0	0	0	0	0
ENSMUSG00000026303	1.07913	1.24956	1.09044	0.565247	1.09435	1.11981	0.385532	0.291833	0.359633	0.438272	0.411375	0.459205		1.31299	1.3693	1.33435	1.10542	0.907726	0.679512	0.232579	0.344553	0.233441	0.26391	0.204568	0.195554
ENSMUSG00000090550	0	0	0	0	0	0	0	0	0	0	0	0		0	0	0	0	0.193609	0	0	0	0	0	0	0
ENSMUSG00000026304	0.0527647	0.0270998	0.054305	0.0253349	0.0258156	0	0.129599	0.0560581	0.0853364	0.151106	0	0.03012		0.0564955	0.0570916	0.114829	0	0.0536508	0	0.0568604	0.0308864	0.0896834	0.0645202	0.0647219	0
ENSMUSG00000100791	0	0	0	0	0	0.0828306	0.0834127	0	0	0	0	0		0	0	0	0	0.0863266	0.175543	0	0	0	0	0	0
ENSMUSG00000026305	6.11731	4.07229	5.20059	19.285	20.0086	20.2901	13.6803	12.256	11.4746	11.0649	9.67662	10.1838		7.07175	7.05846	4.93263	27.9733	25.3923	25.6913	15.3029	19.1263	17.2601	14.7518	15.5552	13.3362
ENSMUSG00000070732	0.00806284	0	0	0.00774273	0.0236689	0.00786623	0	0.0171322	0.00869337	0	0.00913784	0.0184103		0	0	0.00877338	0.00818485	0.00819824	0.0250064	0.0086887	0.00943935	0.0182724	0.0295775	0.03956	0.0378169
ENSMUSG00000100018	0.218973	0.149952	0.225366	0.350466	0.285693	0.142423	0.501982	0.465282	0.157398	0	0.496337	0.333328		0.156304	0.315907	0.158847	0.222287	0.371084	0.150918	0	0.170905	0.165416	0.089253	0.268596	0.171174
ENSMUSG00000034353	1.6173	1.32188	1.37815	1.13559	0.918906	1.11977	1.77689	1.86606	2.04378	2.64947	2.38478	2.91855		1.91786	2.22034	1.34352	0.917982	1.66214	0.86296	1.85528	2.46347	2.79817	3.44489	3.39167	3.50731
ENSMUSG00000034343	4.07733	4.15769	4.0679	5.33095	5.5019	5.67113	4.21024	4.03504	4.08858	4.3302	3.72506	4.30891		4.11744	4.03226	3.60882	6.08184	5.54184	5.567	4.81656	4.75951	4.62013	4.83311	4.25039	3.84009
ENSMUSG00000083064	0.942666	0.847264	0.606365	0.509197	1.15302	0.747239	1.09979	0.751128	0.698764	0.674895	1.20189	1.4798		0.820072	0.764976	1.08985	1.37559	0.958496	0.91363	0.761878	0.758725	1.13492	0.720427	1.01175	0.967171
ENSMUSG00000097285	0	0	0.230161	0	0	0	0	0	0	0	0	0.255315		0.239445	0.241971	0.12167	0	0	0	0	0	0	0	0	0
ENSMUSG00000026307	4.26298	4.23651	4.43499	3.12854	3.48182	3.09955	4.25636	4.54133	3.58739	4.68477	3.77081	4.6559		3.98303	4.23755	4.32438	3.68247	3.17163	3.12917	4.64368	4.81494	5.26248	5.46701	4.73305	4.42967
ENSMUSG00000090322	0.643514	0.991521	0.883066	0.308982	0	0.418548	0	0	0	0.245717	0.243104	0.122447		0.574179	0.348142	0.350112	0	0	0.443514	0	0	0	0	0	0
ENSMUSG00000049515	0.0482586	0.049571	0.00993348	0.0370741	0.0283332	0.00941637	0.0189651	0.0102542	0.041626	0.088449	0	0.0881529		0.0206683	0.0417728	0.0210045	0.0391911	0.0098138	0.0299342	0.0936082	0.0790964	0.131239	0.11802	0.130228	0.101856
ENSMUSG00000026308	0.680526	0.699033	0.647863	1.68278	1.0821	0.979299	1.0029	0.903753	2.40301	0.876992	0.79054	1.28195		1.74875	1.87765	0.888596	1.468	1.64339	1.74125	4.76678	7.28987	6.13041	5.11767	4.31979	3.0921
ENSMUSG00000047443	0.0560074	0.0575305	0.0192141	0.268919	0.474971	0.437133	0.256787	0.158675	0.161033	0.128314	0.148108	0.0639422		0.0999459	0.161601	0.0812574	0.360081	0.265757	0.212304	0.563312	0.655691	0.782715	0.639197	0.526696	0.306471
ENSMUSG00000026309	10.4332	10.9306	11.867	9.89177	10.5515	10.8155	10.0087	10.6924	9.76006	11.6587	10.9666	11.3713		12.1026	13.0286	12.4539	10.8311	11.0893	11.3042	10.3562	11.9153	11.0504	11.7166	12.3914	10.8694
ENSMUSG00000100253	0	0	0.0988808	0	0	0	0	0	0	0	0	0		0	0.103955	0	0	0	0	0	0	0	0	0	0
ENSMUSG00000067071	2.67419	2.26919	2.03428	3.29376	2.75896	1.98509	4.5978	4.38518	3.88621	4.56166	3.29427	3.98224		2.33419	2.83058	2.40379	2.68515	3.01465	2.0434	4.94912	4.18565	4.77584	4.6917	4.56375	3.78325
ENSMUSG00000055866	2.97947	3.49377	3.76841	4.65373	4.10098	5.52471	2.19544	2.16432	1.73203	2.94013	3.11228	2.71512		5.03505	3.37917	3.63265	4.88302	6.38752	5.51098	3.16239	3.16244	2.17617	3.78594	2.81805	2.54656
ENSMUSG00000101911	0	0	0	0	0	0	0	0	0	0.31192	0	0		0	0	0	0	0	0	0	0	0	0	0	0
ENSMUSG00000100151	0	0	0	0	0	0	0	0	0	0	0	0		0	0	0	0	0	0	0	0	0	0	0	0
ENSMUSG00000101958	0.0243079	0	0	0.0233428	0	0.0237151	0.0238818	0	0	0	0	0		0	0.0526024	0	0	0	0	0.0261947	0	0.0275438	0.0594469	0	0.0570052
ENSMUSG00000034292	2.5484	2.6177	2.7685	2.90947	2.88156	2.48626	3.08793	3.06845	2.79348	3.29222	3.38558	2.73164		2.54668	2.60419	2.95784	3.11872	2.67757	2.47356	3.1734	2.83429	2.80744	3.39315	3.38639	2.83876
ENSMUSG00000026311	6.33225	5.9925	6.00415	4.62929	5.44469	6.18581	7.27285	7.82125	7.38245	7.21621	6.25052	6.02603		6.7275	7.01066	7.02364	6.56078	7.25276	6.97715	6.47158	8.49422	8.31401	10.0609	8.44874	8.53634
ENSMUSG00000101705	0	0	0	0	0	0	0	0	0	0	0	0		0	0	0	0	0	0	0	0	0.154675	0	0	0
ENSMUSG00000100980	0.107252	0.061205	0.0981184	0.102994	0.0699656	0.034879	0.0468321	0.0506429	0.179884	0.0273019	0.0405173	0.108842		0.0382786	0.0644708	0.103737	0.048389	0.0484682	0.0739191	0.128419	0.111611	0.175544	0.0145719	0.0584698	0.0838403
ENSMUSG00000007805	0.960337	0.748344	0.732758	1.49462	1.79841	1.5023	0.699494	0.615685	0.856913	0.493137	0.562953	0.642712		1.20552	0.84202	0.774716	2.23547	1.93609	1.72885	1.03488	0.833524	0.994373	0.445421	0.710839	0.796007
ENSMUSG00000101414	0.428717	0.36698	0.661849	0.617545	0.454467	0.697106	0.421203	0.493433	0.693366	0.24555	0.323918	0.326304		0.879809	0.463874	0.466498	0.797875	0.653875	0.590951	0.846992	0.543735	0.32386	0.349488	0.394403	0.0837833
ENSMUSG00000102745	0	0	0	0	0	0	0.0156842	0	0	0	0	0		0	0	0	0	0	0	0	0	0	0	0	0.0187189
ENSMUSG00000026313	4.02137	3.63914	4.18323	5.09682	5.51548	5.54775	6.79486	6.28144	5.68676	5.70294	4.91158	4.90601		4.34841	4.10301	4.15154	4.73335	5.53184	5.05408	6.21018	7.79333	7.89704	8.46506	7.36638	6.20006
ENSMUSG00000103101	0	0	0	0.00904753	0	0	0	0	0.0101584	0	0	0.0107564		0.0100878	0	0	0	0.0095798	0.0194803	0.0101529	0	0.0320275	0	0	0.0110474
ENSMUSG00000096941	0	0	0	0	0	0	0	0	0	0	0	0		0	0	0	0	0	0	0	0	0	0	0	0
ENSMUSG00000102565	1.02758	1.05553	1.20867	1.34928	1.27228	1.04345	1.33923	1.29224	1.35667	1.4894	1.33096	1.0774		1.27987	1.248	1.23224	1.40504	1.59925	1.60433	1.98871	2.7252	1.94856	3.56442	3.36977	2.18851
ENSMUSG00000101265	0	0	0	0	0	0	0	0	0	0	0	0		0	0	0	0.0701959	0	0	0	0	0	0	0	0
ENSMUSG00000101522	0	0	0	0	0	0	0	0	0	0	0	0		0	0	0	0	0	0	0	0	0	0	0	0
ENSMUSG00000026260	17.5284	13.4511	15.7019	16.1052	15.3147	14.7151	15.3611	14.9851	14.1871	13.8076	12.1767	13.095		16.3014	14.2371	14.4035	15.2952	15.8335	15.2504	11.5102	12.8371	12.407	12.9064	13.2564	12.7278
ENSMUSG00000098288	0	0	0	0	0	0	0	0	0	0	0	0		0	0	0	0	0	0.905509	0	0	0	0	0	0
ENSMUSG00000067064	0	0	0	0	0	0	0	0	0	0	0	0		0	0	0	0	0	0	0	0	0	0	0	0
ENSMUSG00000057464	0	0	0	0	0	0	0	0	0	0	0	0		0	0	0	0	0	0	0	0	0	0	0	0
ENSMUSG00000042849	0	0	0	0	0	0	0.00848799	0	0	0	0	0		0	0	0	0	0	0	0	0	0	0	0	0
ENSMUSG00000058904	0	0	0	0	0	0	0	0	0	0	0	0		0	0	0	0	0	0	0	0	0	0	0	0
ENSMUSG00000097001	0	0	0	0	0	0	0	0	0	0	0	0		0	0	0	0	0	0	0	0	0	0	0	0
ENSMUSG00000099363	0	0	0	0	0	0	0	0	0	0	0	0		0	0	0	0	0	0	0	0	0	0	0	0
ENSMUSG00000046300	0	0	0	0	0	0	0	0	0	0	0	0		0	0	0	0	0	0	0	0	0	0	0	0
ENSMUSG00000107778	0	0	0	0	0	0	0	0	0	0	0	0		0	0	0	0	0	0	0	0	0	0	0	0
ENSMUSG00000062497	0	0	0	0	0	0	0	0	0	0	0	0		0	0	0	0	0	0	0	0	0	0	0	0
ENSMUSG00000108131	0	0	0	0	0	0	0	0	0	0	0	0		0	0	0	0	0	0	0	0	0	0	0	0
ENSMUSG00000063583	0	0	0	0	0	0	0	0	0	0	0	0		0	0	0	0	0	0	0	0	0	0	0	0
ENSMUSG00000061616	0	0	0	0	0	0	0	0	0	0	0	0		0	0	0	0	0	0	0	0	0	0	0	0
ENSMUSG00000073616	16.2324	11.56	14.6495	11.3458	11.5268	11.9373	14.2945	14.7872	11.6048	14.9397	14.1848	15.5301		13.4762	13.5045	12.1313	13.2038	13.1184	12.0332	13.5632	13.0932	13.4672	16.5478	14.4063	14.2238
ENSMUSG00000044055	0.0170518	0.0525466	0.0175496	0.081874	0.0166855	0.016636	0.0502587	0	0	0	0.0386505	0.0584027		0.0182575	0.0184501	0.0185545	0	0.0173381	0	0	0.0798516	0.0193218	0.0625524	0.0836638	0
ENSMUSG00000100546	0.048751	0	0.100348	0	0	0.142687	0.095793	0.0517939	0.0525634	0.0558447	0.110502	0.166973		0.104396	0.158246	0.212189	0.148466	0.148709	0.251997	0.210141	0.399517	0.165723	0.536511	0.239195	0.228655
ENSMUSG00000099665	0	0.469416	0.235164	0	0	0	0	0	0	0	0	0.260866		0	0.247231	0.49726	0	0	0	0	0	0.258912	0	0	0
ENSMUSG00000100781	0	0	0	0	0	0	0.0492206	0.0532258	0	0	0.0567783	0		0	0	0	0	0	0	0.0539876	0.0586517	0.0567681	0	0	0.0587441
ENSMUSG00000034220	6.7844	8.84192	7.87361	23.9961	27.6611	31.9121	42.8352	40.1302	32.3352	37.7844	30.3517	33.2385		13.6993	17.1615	12.8913	44.9727	48.6301	46.0425	46.0836	69.7426	59.5152	57.7724	48.6315	40.4925
ENSMUSG00000101995	0	0.032618	0	0	0	0	0	0	0	0.07275	0	0		0	0	0	0	0	0	0	0	0	0	0	0
ENSMUSG00000065470	0	0.817922	0	3.05861	2.33749	0	3.12924	3.38387	2.57561	1.82426	2.70729	0.909077		0.852569	0.861564	1.73288	4.04158	2.42892	4.11595	2.57423	9.32207	3.60908	2.92101	3.90685	1.86735
ENSMUSG00000034212	0.043379	0.155955	0.0892906	0.0312425	0.0530589	0.0529015	0.0426186	0.0691298	0.0467713	0.111805	0.0860345	0.0866681		0.0116115	0.0469362	0.0708026	0.0220177	0.0441074	0.0672685	0.0467461	0.0888732	0.0245769	0.0132609	0.0532092	0.0635809
ENSMUSG00000047067	3.35959	2.95796	2.46976	2.15081	2.62211	2.38021	1.9647	2.03959	1.72491	2.24492	2.40236	2.28307		3.38302	3.85147	2.52414	1.86762	2.96867	2.23276	2.71528	3.13715	3.263	2.73872	2.50199	3.1421
ENSMUSG00000097251	2.02921	2.0844	1.96738	1.12965	1.03598	1.11898	1.04016	1.21853	1.36347	1.61703	1.46651	1.54446		1.82632	2.67292	2.01603	0.92547	0.98679	1.12492	1.01413	1.23947	1.19966	1.51036	1.0822	1.4828
ENSMUSG00000026269	4.85179	4.23104	5.17053	5.38948	5.58409	5.55127	6.83924	7.18344	7.24827	7.37008	6.2725	6.14758		5.34344	4.95534	4.91692	5.4211	5.64446	5.22817	5.5933	6.85641	6.11412	7.81979	6.9318	5.53282
ENSMUSG00000100632	0.248922	0.319614	0.256188	0.328679	0.274021	0.242852	0.489117	0.297516	0.369033	0.249499	0.493692	0.426281		0.299838	0.437668	0.406287	0.189516	0.474566	0.418174	0.335305	0.437127	0.387832	0.418522	0.725161	0.255393
ENSMUSG00000026270	3.65191	3.82575	3.31048	2.64761	3.12382	2.91399	3.32653	3.37881	3.63762	4.07248	3.67285	3.12006		3.7677	3.42802	3.23688	3.08112	2.95091	3.02531	3.46626	3.56753	3.27483	4.30287	3.70818	2.96344
ENSMUSG00000026271	0.390975	0.334673	0.424744	7.24833	8.17226	3.39059	2.48612	1.74228	1.19439	2.18957	1.78472	2.26903		0.604674	0.423037	0.484518	10.683	7.90665	5.86082	1.73211	1.04259	1.03372	0.876483	0.799293	1.12064
ENSMUSG00000100021	0	0	0	0	0	0	0	0	0	0	0	0		0	0	0	0	0	0	0	0.0289396	0	0	0	0
ENSMUSG00000045091	0	0	0	0	0	0	0	0	0	0.0553315	0	0		0	0	0	0.0490339	0	0	0	0.0565493	0	0	0	0
ENSMUSG00000014602	90.8282	98.6214	101.567	46.6645	50.383	62.741	56.6407	62.4884	49.1204	74.7701	54.3322	61.6904		79.1271	86.0811	96.1662	38.8938	44.9826	46.1489	22.3315	36.8099	35.2639	58.0219	51.2387	40.7449
ENSMUSG00000101378	0	0	0	0	0	0	0	0	0	0.379815	0	0		0	0	0	0	0	0	0	0	0	0	0	0
ENSMUSG00000026272	0	0	0	0	0.0909099	0.0302134	0	0	0	0	0	0		0	0	0	0	0.0629772	0.0320156	0	0	0	0	0	0
ENSMUSG00000034159	0	0	0	0.0213121	0.0217165	0	0	0	0	0	0	0.0253374		0	0	0	0.0225291	0.0225659	0.0229436	0	0	0	0	0	0
ENSMUSG00000084989	0.0368435	0.0227073	0.0379191	0.261818	0.3461	0.201293	0.115833	0.0469718	0.0556147	0.101291	0.0918627	0.0420633		0.0394486	0.0398649	0.0240542	0.164565	0.134864	0.327568	0.0794068	0.0776404	0.208742	0.189218	0.153655	0.112324
ENSMUSG00000047793	13.0346	11.3187	14.1275	17.978	17.8694	16.898	17.8491	21.6958	18.6749	21.3947	18.8703	19.692		20.6853	21.9101	15.804	21.7757	21.2652	19.4802	27.6512	19.5189	31.5411	30.2928	26.9575	29.2108
ENSMUSG00000098997	0	0	0	0	0	0	0	0	0	0	0.960653	0		0	1.8343	0.922337	0	0	0.876299	0	0	0	1.03649	0	0
ENSMUSG00000026273	2.86148	2.45795	2.80136	2.23086	2.24392	2.31508	2.94847	2.84942	2.53701	2.9238	2.54242	2.68636		2.87166	2.6862	2.79903	2.35824	2.21003	2.4944	2.68606	2.83641	2.94868	2.74312	2.81284	3.05132
ENSMUSG00000101172	0	0.0609975	0	0.11405	0	0.0579346	0.116683	0.126178	0.0640264	0.0680233	0	0.135591		0.0635814	0.0642522	0.129231	0.120562	0	0.0613904	0.255968	0	0.0672879	0	0.145679	0
ENSMUSG00000100351	0	0.0988696	0	0	0	0.18781	0	0.20452	0	0	0	0		0	0.104145	0	0	0	0	0	0	0.109066	0	0.236128	0.112862
ENSMUSG00000026274	0.37124	0.303877	0.358197	1.30903	1.47009	1.02997	0.86624	0.955215	0.994424	0.465126	0.473328	0.3841		0.316749	0.351473	0.38502	0.877371	1.39783	1.40324	0.931381	1.20199	0.926768	0.971734	0.804008	0.659756
ENSMUSG00000026275	5.44314	5.34942	5.3959	4.77021	5.40462	4.49455	3.37001	3.12819	2.9479	3.79731	3.39373	3.88179		4.31605	4.17738	4.76223	4.76302	4.58751	4.44687	2.95171	2.98981	3.05835	3.23913	3.37824	2.93581
ENSMUSG00000106302	0.82115	0	0	1.5771	0.803511	0	0	1.74481	0	1.88127	1.86126	0		0	0	1.78703	0	0.83494	0	0	0	0	1.0041	0	0.962853
ENSMUSG00000098689	0	1.26522	0.422561	0.788549	0.401755	0.801127	1.21014	0	0.885366	0.940635	0.930632	1.40623		0.439606	0.888488	1.78703	0.416788	0.41747	0	1.32733	1.44201	0.465233	1.50614	1.51085	0
ENSMUSG00000064389	1.02046	0.524105	0.525124	0.489972	1.99708	1.49336	1.00257	0.542076	2.20052	1.75342	1.15651	0.582515		0	0.55207	1.66558	1.0359	0	0.527481	1.09967	0.597337	0.578153	0.623904	1.25171	0
ENSMUSG00000034107	0	0.0135499	0.0271525	0	0.0129078	0	0.11664	0.126131	0.056891	0.0906636	0.119599	0.01506		0.0282478	0	0.0287073	0	0	0	0.0995057	0.0308864	0.0298945	0.0161301	0.0485414	0
ENSMUSG00000034088	23.222	21.76	24.1532	39.3884	40.5628	33.9655	33.8028	32.504	32.7216	31.4192	29.2804	29.5914		26.2906	24.8099	23.0205	40.8694	41.413	37.753	38.7826	34.0185	35.5984	38.4948	38.4044	36.451
ENSMUSG00000090489	0	0	0	0	0.0651771	0	0	0	0	0	0	0		0	0.07207	0	0	0	0	0	0.0779793	0	0	0	0
ENSMUSG00000026276	1.50831	1.72523	1.72181	2.024	2.03662	2.24263	2.43958	3.12793	2.78381	2.25592	2.63502	2.67699		1.65022	2.06672	1.87057	2.38027	2.25692	2.51259	2.99525	3.45451	3.32118	2.94773	3.40937	2.9425
ENSMUSG00000116048	0	0	0	0	0	0	0	0	0	0	0	0		0	0	0	0	0	0	0	0	0	0	0	0
ENSMUSG00000034066	7.31835	7.85767	8.14158	7.28809	7.75054	9.04975	6.80542	6.42063	6.31036	7.92325	6.70126	6.85376		7.74982	8.11401	8.72793	8.12207	8.83968	8.65552	9.14133	13.8095	12.7404	15.6144	16.5498	13.0426
ENSMUSG00000103854	1.1884	1.17551	1.54019	1.39482	1.44282	2.38325	1.36216	1.40286	1.35252	1.10922	1.04755	0.979884		1.83795	2.07165	1.93969	1.63085	2.37196	1.86562	1.80239	3.01445	2.86777	3.14852	2.88842	2.91598
ENSMUSG00000026277	14.6485	15.5112	14.983	15.4388	15.0328	16.2056	17.3678	17.3784	16.3887	18.489	18.4974	16.0837		16.2457	16.603	15.9984	16.7702	17.7722	17.3686	17.822	19.944	19.7441	21.5276	20.9072	19.2544
ENSMUSG00000100927	0.039904	0.0409892	0	0	0.0390468	0.116793	0	0	0.0430246	0.0914208	0	0		0	0.0431763	0	0	0.0811483	0	0.086003	0.0467165	0.0904325	0.0487943	0	0.0467901
ENSMUSG00000026278	9.05407	9.44699	8.73048	13.9333	12.2693	16.3848	3.31121	2.85238	3.9418	3.6971	2.84854	3.55429		8.50159	9.08576	8.45342	15.6857	17.0473	16.181	4.18591	4.28005	3.88368	3.28296	3.85376	3.44953
ENSMUSG00000026279	2.66839	2.7658	3.03668	3.22048	3.26581	3.07523	3.27108	2.95485	2.85968	3.25983	2.89625	2.59545		3.07286	3.06167	2.70179	3.36346	3.50011	3.17532	2.6844	3.75628	2.74958	3.73606	3.30275	2.99653
ENSMUSG00000101952	0	0	0.0550792	0	0	0	0	0.0568573	0	0	0	0		0	0	0.0582331	0	0	0	0	0	0	0	0	0
ENSMUSG00000026280	5.21854	5.26264	5.39048	5.84048	5.40462	5.99558	6.47433	6.53576	5.83199	6.22514	6.04383	5.84915		5.82544	6.6013	5.8304	6.55421	6.15181	6.07756	5.65098	6.39189	6.63263	7.52235	7.18764	6.17864
ENSMUSG00000026281	6.71152	6.52472	6.47573	8.01796	9.34284	8.8669	9.16471	8.53106	7.71018	7.77963	7.37997	7.00103		7.57104	6.13803	6.52051	9.34771	10.0332	9.47841	8.33028	8.88626	9.05356	9.86769	9.55551	9.4858
ENSMUSG00000026283	5.74545	5.89028	5.95892	7.03274	6.95957	6.98229	4.57475	5.15952	4.80483	5.48667	5.42833	4.9608		5.80662	6.33684	5.79225	6.96051	7.25439	7.27241	4.86212	5.26917	4.65921	5.39481	4.75736	4.67805
ENSMUSG00000088961	0	0	0	0	0	0	0	0	0	0	0	0		0	0	0	0	0	0	0	0	0	0	0	0
ENSMUSG00000073609	1.4854	1.57623	1.89516	1.07277	1.21324	1.01802	1.785	1.4216	1.72068	2.24997	1.46084	1.54167		2.0899	1.75332	1.83002	0.959557	1.13588	1.0026	1.33612	1.20723	1.14064	1.96644	1.86718	1.18034
ENSMUSG00000094651	0	0	0	0.0164764	0	0	0	0	0	0.0196541	0	0		0.0183707	0	0	0	0	0	0	0	0	0	0	0
ENSMUSG00000101660	0	0	0	0	0	0	0	0	0	0	0	0		0	0	0	0	0	0	0	0	0	0	0	0
ENSMUSG00000093805	0	0	0	0	0	0	0	0	0	0	0	0		0	0	0	0	0	0	0	0	0	0	0	0
ENSMUSG00000099624	0.438861	0.338097	0.508132	0.105359	0.107358	0.21408	0.0538961	0.291408	0.354886	0.691239	0.186515	0.250518		0.234946	0.0593562	0.596919	0.0556877	0.50201	0.0567124	0.295579	0.128446	0.621605	0.335397	0.269156	0.257297
ENSMUSG00000073608	0	0.00558424	0	0.00522056	0	0	0	0.00577572	0	0	0	0.00620659		0.00582078	0	0	0	0	0	0.00585838	0	0	0.0132952	0.00666835	0.00637453
ENSMUSG00000034000	0.0226671	0.0232835	0.0233288	0	0	0.0110572	0	0	0	0	0	0.0258784		0	0	0	0	0	0	0.0122133	0	0	0	0.0139019	0.0132893
ENSMUSG00000026285	0.108919	0.0559408	0	0.339934	0.506253	0.0265659	0.10701	0.0867884	0.0587185	0.31192	0.216022	0.0621752		0.0874656	0	0	0.469912	0.304558	0.253355	0.234748	0.0318786	0.0925644	0.0332964	0.200403	0.223502
ENSMUSG00000100990	0	0	0.0641611	0	0	0	0	0	0	0	0	0		0	0	0	0.0632845	0	0	0	0	0	0	0	0
ENSMUSG00000100347	0.224014	0.0920423	0.414996	0.344192	0.306882	0.0437102	0.17607	0.142798	0.289838	0.359254	0.304657	0.255751		0.191882	0.339337	0.48751	0.181923	0.0911102	0.277905	0.144841	0.262258	0.253835	0.109569	0.164867	0.262671
ENSMUSG00000077413	0	0	0	0	0	0	0	0	0	0	0	0		0	0	0	0	0	0	0	0	0	0	0	0
ENSMUSG00000100518	0	0	0	0	0	0	0	0	0	0	0	0		0	0	0	0	0	0	0	0	0	0	0	0
ENSMUSG00000089310	0	0	0	0	0	0	0	0	0	0	0	0		0	0	0	0	0	0	0	0	0	0	0	0
ENSMUSG00000099592	0	0	0	0.0595131	0	0	0	0	0	0	0	0		0	0	0	0	0	0	0	0	0	0	0	0
ENSMUSG00000051185	4.53048	4.53034	4.49421	4.87478	4.50794	4.44131	5.21258	5.39317	4.7553	4.48941	5.32011	4.89814		4.80407	4.67757	4.18136	4.33307	4.21806	4.36766	5.51742	4.077	4.45325	4.0848	4.78049	4.69786
ENSMUSG00000103973	0.848975	0.957142	1.04425	1.034	0.769952	0.767668	1.17994	1.14396	1.07165	1.28086	1.22031	1.01653		0.864662	0.85138	0.721007	1.13508	1.09483	0.813459	1.31653	1.28482	1.19663	0.96216	0.86357	1.01976
ENSMUSG00000081051	0.098971	0.609975	0.305581	0.190083	0.484225	0.0965577	0	0.420594	0.213421	0.113372	0.560833	0		0.211938	0	0.323078	0.301406	0.100633	0	0	0.46347	0.112146	0.242042	0.364198	0.2321
ENSMUSG00000040710	1.24511	1.20643	1.21416	3.58452	2.61846	1.06673	1.96857	1.95645	1.66682	2.17239	2.09593	3.30889		0.941046	0.917012	1.04459	2.38451	2.548	1.42512	2.88647	1.78229	1.9266	1.30181	1.30267	1.76056
ENSMUSG00000103197	0.212032	0.217798	0.529967	1.33803	1.00775	0.236413	0.714224	0.868884	0.587862	0.659258	0.446274	0.968285		0.227024	0.0983226	0.296636	0.707218	1.20116	0.720232	1.50151	0.780153	0.823743	0.333348	0.483008	0.745864
ENSMUSG00000100777	0	0	0	0	0	0	0	0	0	0	0	0		0	0	0	0	0	0	0	0	0	0	0	0
ENSMUSG00000102718	0	0	0	0	0	0	0	0	0	0	0	0		0	0	0	0	0	0	0	0	0	0	0	0
ENSMUSG00000095955	0	0	0	0	0	0	0	0	0	0	0	0		0	0	0	0	0	0	0	0	0	0	0	0
ENSMUSG00000100062	0	0	0	0	0	0	0	0	0	0	0	0		0	0	0	0	0	0	0	0	0	0	0	0
ENSMUSG00000080345	0	0	0	0	0	0	0	0	0	0	0	0		0	0	0	0	0	0	0	0	0	0	0	0
ENSMUSG00000096585	0	0	0	0	0	0	0	0	0	0	0	0		0	0	0	0	0	0	0	0	0	0	0	0
ENSMUSG00000102658	0	0	0	0	0	0	0	0	0	0	0.0259636	0		0	0	0	0	0	0	0	0	0	0	0	0
ENSMUSG00000100336	0	0	0	0	0	0	0	0	0	0.0446261	0	0		0	0	0	0	0	0	0	0	0	0	0	0
ENSMUSG00000100589	0	0	0	0	0	0	0	0	0	0	0	0		0	0	0	0	0	0	0	0	0	0	0	0
ENSMUSG00000095610	0	0	0	0	0	0	0	0	0	0	0	0		0	0	0	0	0	0	0	0	0	0	0	0
ENSMUSG00000100362	0	0	0	0	0	0	0	0	0.0830842	0	0	0		0	0	0	0	0	0	0	0	0	0	0	0
ENSMUSG00000077255	0	0	0	0	0	0	0	0	0	0	0	0		0	0	0	0	0	0	0	0	0	0	0	0
ENSMUSG00000040693	2.03447	2.00181	2.03876	1.31618	1.29924	1.5461	0.0315602	0.147889	0.0692707	0.576493	0.533957	0.599013		1.13502	1.40189	1.15348	0.413051	0.587928	0.398512	0.0230778	0.0125358	0.0121332	0.0261867	0.0262685	0.0376666
ENSMUSG00000097814	3.55885	3.43289	3.03259	0.943196	1.08591	1.29425	0.0250643	0.121967	0.055013	0.847485	0.60717	0.582515		1.73452	1.84944	1.83214	0.297821	0.428008	0.448359	0.0137459	0	0	0.0155976	0.0312927	0.0149569
ENSMUSG00000045463	0	0	0	0	0	0	0	0	0	0	0	0		0	0	0	0	0	0	0	0	0	0	0	0.0247282
ENSMUSG00000097480	0.0545162	0	0	0	0	0	0	0	0	0	0	0		0.0583709	0	0	0	0.0554317	0	0	0	0	0	0	0
ENSMUSG00000100454	0	0	0	0	0	0	0	0	0	0	0	0		0	0	0	0	0	0	0	0	0	0	0	0
ENSMUSG00000044757	0.0421103	0.129766	0	0.202192	0	0.0410834	0.0413721	0.0447387	0.0454034	0	0	0.0480762		0.0450878	0	0	0	0	0.0870681	0	0	0	0.0514921	0	0
ENSMUSG00000026331	0.110951	0.0759786	0.11419	0	0.0180945	0	0	0	0	0	0	0		0.0791971	0	0.0201214	0	0	0	0	0	0	0	0	0
ENSMUSG00000100484	0.0257742	0.105901	0.0265266	0.0495018	0.0504411	0	0	0	0	0	0	0		0.0275966	0.0557756	0.0280456	0	0	0	0	0	0	0	0	0
ENSMUSG00000101348	0.0233054	0	0	0	0	0	0	0	0	0	0	0		0	0	0	0	0	0	0	0	0	0	0	0
ENSMUSG00000103179	0	0	0.0912874	0.25553	0.303775	0.0432676	0.0871433	0	0.0956344	0.0508022	0.050262	0		0.0949697	0	0.0482573	0.225101	0.36075	0.366788	0.095583	0	0	0	0	0.104004
ENSMUSG00000044768	0.338284	0.321357	0.289261	2.15796	1.8542	0.936755	0.765915	0.686371	0.5951	0.565237	0.540489	0.670786		0.398968	0.454091	0.434519	1.45107	1.47802	1.08466	0.607115	0.652121	0.631178	0.648468	0.617736	0.560693
ENSMUSG00000040648	11.6428	13.3559	12.4153	10.3138	9.55832	10.9133	10.4191	9.25582	8.15612	9.91692	9.6748	9.85452		10.2319	11.3956	11.2533	7.71984	8.01858	8.6137	8.30533	11.47	10.2859	10.8183	10.2739	11.2438
ENSMUSG00000026333	1.02535	1.15142	1.02846	1.36849	1.18188	1.06817	1.21227	1.43093	1.20859	0.985427	1.12267	1.12101		0.967598	1.00601	1.23863	1.12026	1.06024	1.069	1.10494	1.32248	1.28001	1.13691	1.11915	1.43664
ENSMUSG00000026335	43.9935	43.8645	43.7269	27.487	27.0399	31.2625	21.8609	21.311	22.9188	28.1463	33.6417	25.7211		36.1503	36.9095	33.7089	25.2972	25.9497	26.9505	30.2785	28.7865	29.2842	23.8903	24.6154	28.2256
ENSMUSG00000104140	4.77476	5.83425	5.39593	3.08677	3.54232	3.95806	3.55663	3.08346	3.26387	3.96809	3.46611	3.02846		4.17678	3.98448	4.24472	3.35806	2.72892	3.9038	4.43916	4.38425	4.13737	3.2818	2.90926	3.1104
ENSMUSG00000089169	0	0	0	0	0	0	0	0	0	0	0	0		0	0	0	0	0	0	0	0	0	0	0	0
ENSMUSG00000089782	2.14943	2.09749	1.88035	2.37371	2.20842	3.35523	1.6894	1.37016	0.811132	2.21597	2.55781	1.71776		1.9562	1.86056	1.87108	1.74557	1.74842	2.111	2.5479	1.50983	2.3138	2.75972	1.71374	2.64637
ENSMUSG00000089706	2.28065	1.87229	2.53204	2.66433	2.42495	2.19875	1.7202	1.62169	1.51025	1.86166	1.6587	1.70167		1.56705	1.67102	2.10059	2.47922	2.21852	2.40417	1.69328	1.5978	1.50579	1.2736	1.22252	0.937026
ENSMUSG00000096085	0	0	0	0	0	0	0	0	0	0	0	0		0	0	0	0	0	0	0	0	0	0	0	0
ENSMUSG00000100182	0.363016	0.344205	0.488572	0.18771	0.327894	0.435895	0.164609	0.0890019	0.210757	0.0959627	0.0949423	0.255044		0.448482	0.664714	0.273467	0.425203	0.567866	0.433027	0.120368	0.0980749	0.158209	0.102437	0.102757	0.0327431
ENSMUSG00000100711	0	0	0	0.012085	0	0	0	0	0.0135688	0	0	0		0	0	0	0	0	0	0	0	0	0	0	0
ENSMUSG00000097608	0.106816	0.109721	0.164902	0	0.0522609	0.0521058	0.052472	0.0567417	0.0575848	0.244718	0	0		0.0571845	0.231151	0.232459	0	0	0.0552139	0.172661	0	0.0605181	0.065307	0	0
ENSMUSG00000099634	0	0.562321	0.37561	0.175233	0.535674	0.712113	1.07568	0.581603	0.393496	1.25418	0.413614	1.04165		0.19538	0.987209	0.794235	0.926195	0.371084	0.565943	0	0.854523	1.03385	0.669397	0.895319	0.855869
ENSMUSG00000026336	0	0	0	0	0	0	0	0	0	0	0	0		0	0	0	0	0	0	0	0	0	0	0	0
ENSMUSG00000089791	0.0376728	0.0386974	0.0387726	0.0361771	0.0368636	0.0735084	0.0370125	0.0400243	0	0.0863091	0.0853913	0.0430101		0	0	0	0	0.076611	0.0778932	0.0405971	0	0	0.138198	0.09242	0
ENSMUSG00000096193	0	0	0	0	0	0	0	0	0	0	0	0		0	0	0	0	0	0	0	0	0	0	0	0
ENSMUSG00000100009	0.00883254	0.00907274	0.0272712	0.0339275	0.0172856	0.00861716	0	0.00938384	0.038093	0	0.0100102	0.0100839		0.0189141	0.0191137	0.0288327	0.00896619	0.00898087	0.00913118	0.00951814	0.0103404	0.0500418	0	0	0.0310702
ENSMUSG00000099686	0	0	0	0	0	0	0	0.0781987	0	0	0	0		0.0788089	0	0	0	0	0	0	0	0	0	0	0
ENSMUSG00000087804	0	0	0	0	0	0	0	0	0	0	0	0		0	0	0	0	0	0	0	0	0	0	0	0
ENSMUSG00000099453	0	0	0	0	0	0	0	0	0	0	0	0		0	0	0	0	0	0.0294315	0	0	0	0	0	0
ENSMUSG00000067028	0.040387	0.0207427	0.0519575	0	0.0197597	0.00985055	0	0	0	0	0.0114429	0.0115272		0.0432427	0.0218495	0.0329596	0	0.0205326	0.0104381	0	0	0.0114409	0	0	0
ENSMUSG00000082431	0.176059	1.26593	1.63079	0	0.689108	0.0858829	1.12432	0	0.854222	0.100839	0.698364	2.11052		1.03679	0.190497	0	0.357446	0.179016	0	0.948626	0	0.0997484	0.968776	0.323935	0
ENSMUSG00000104104	0	0	0	0	0	0	0	0	0	0	0	0		0	0	0	0	0	0	0	0	0	0	0.0237959	0
ENSMUSG00000100662	0.0931802	0	0.0959003	0	0	0	0.183094	0.197992	0.100467	0.320216	0	0.106381		0	0.100821	0.101392	0	0.284235	0	0	0	0	0	0.114296	0.10926
ENSMUSG00000087883	0	0	0	0	0	0	0	0	0	0	0	0		0	0	0	0	0	0	0	0	0	0	0	0
ENSMUSG00000099835	0.166837	0.171374	0.686829	0.160213	0	0.325537	0.491737	0	0.539651	0.191113	0.189081	0.57142		0.178633	0	0.726157	0.169361	0	0.172478	0	0	0.378094	0.204007	0.409289	0.195627
ENSMUSG00000100794	0.107252	0.110169	0.110383	0	0	0	0	0	0	0	0	0		0.114836	0	0	0	0	0	0	0	0	0	0	0
ENSMUSG00000099427	0	0	0	0	0	0	0	0	0	0	0	0		0	0	0	0	0	0	0	0	0	0	0	0
ENSMUSG00000099892	0	0	0	0	0	0	0	0	0	0	0	0		0	0	0	0	0	0	0	0	0	0	0	0
ENSMUSG00000100977	0	0	0	0	0	0	0	0	0	0	0	0		0	0	0	0	0	0	0	0	0	0	0	0
ENSMUSG00000077039	0	0	0	0	0	0	0	0	0	0	0	0		0	0	0	0	0	0	0	0	0	0	0	0
ENSMUSG00000100684	0	0	0	0	0	0	0	0	0	0	0	0.0710048		0	0	0	0	0	0	0	0	0	0	0	0
ENSMUSG00000100088	0	0	0	0	0	0	0	0	0	0	0	0		0	0	0	0	0	0	0	0	0	0	0	0
ENSMUSG00000100222	0.0745441	0	0	0	0.0729428	0	0	0	0.0803736	0	0	0.0851051		0.0798149	0	0.0811133	0.0756721	0	0	0	0	0	0	0	0
ENSMUSG00000100065	0.0719913	0.0739491	0.0740929	0.138266	0	0	0.0707294	0	0	0	0	0.0821905		0.154163	0	0	0	0.1464	0	0	0	0	0	0.0883054	0
ENSMUSG00000100349	0.222685	0	0	0	0.217901	0	0	0.709752	0.480198	2.0407	0.757125	0.7627		0.23843	0.722838	0.726927	0.226054	0.679273	0	0.23997	2.34632	0.25233	0.816892	0.273148	0.261113
ENSMUSG00000099375	1.40373	2.2008	0.912446	1.2534	0.626543	0.528579	1.62107	2.40708	2.12421	1.9183	2.67938	1.9681		1.47661	2.05177	0.803911	1.99996	1.97819	0.891082	2.44153	2.71013	3.06958	1.80681	2.11453	1.64596
ENSMUSG00000077295	0	0	0	0	0	0	0	0	0	0	0	0		0	0	0	0	0	0	0	0	0	0	0	0
ENSMUSG00000099770	0	0	0	0	0	0	0	0	0	0	0	0		0	0	0	0	0	0	0	0	0	0	0	0
ENSMUSG00000088510	0	0	0	0	0	0	0	0	0	0	0	0		0	0	0	0	0	0	0	0	0	0	0	0
ENSMUSG00000101890	0	0	0	0	0	0	0	0	0	0	0	0		0	0	0	0	0	0	0	0	0	0	0.0577625	0
ENSMUSG00000099989	0	0	0.202576	0	0	0	0	0	0	0	0	0		0	0	0	0	0	0	0	0	0	0	0	0
ENSMUSG00000087908	0	0	0	0	0	0	0	0	0	0	0	0		0	0	0	0	0	0	0	0	0	0	0	0
ENSMUSG00000100955	0	0	0	0	0	0	0	0	0	0	0	0		0	0	0	0.0708484	0	0	0	0	0	0	0	0
ENSMUSG00000088594	0	0	0	0	0	0	0	0	0	0	0	0		0	0	0	0	0	0	0	0	0	0	0	0
ENSMUSG00000099469	0	0	0	0	0	0	0	0	0	0	0	0		0	0	0	0	0	0	0	0	0	0	0	0
ENSMUSG00000102325	0	0	0	0	0	0	0	0	0	0	0	0		0	0	0	0	0	0	0	0	0	0	0	0
ENSMUSG00000101297	0	0	0	0	0	0	0	0	0	0	0	0		0	0	0	0	0	0	0	0	0	0	0	0
ENSMUSG00000100059	0	0	0	0	0	0	0	0	0	0	0	0		0	0	0	0	0	0	0	0	0	0	0	0
ENSMUSG00000088161	0	0	0	0	0	0.15537	0	0	0	0	0	0		0	0	0	0	0	0	0	0	0	0.194734	0	0
ENSMUSG00000099464	0	0	0	0.0531793	0	0	0	0	0	0	0	0		0	0	0	0.0562159	0	0.114501	0	0	0	0	0	0
ENSMUSG00000100935	0	0	0	0	0	0	0	0	0	0	0	0		0	0	0	0	0	0	0	0	0	0	0	0
ENSMUSG00000099801	0	0	0	0	0	0	0	0	0	0	0	0		0	0	0	0	0	0	0	0	0	0	0	0
ENSMUSG00000050840	0.406072	0.349839	0.350519	0.0377371	0.0128177	0.0383391	1.54434	1.72567	0.776791	1.24543	0.668051	0.927204		0.813468	0.708664	0.570138	0.172865	0.106553	0.27084	0.254086	0.552075	0.282015	1.12122	0.514161	0.537585
ENSMUSG00000103991	0.383476	0.214857	0.179396	0	0.0170563	0.0340114	1.59264	1.3889	0.319495	0.87855	0.553132	0.716407		0.970486	0.584663	0.834539	0.212334	0.141787	0.180201	0.281756	0.408131	0.454277	0.87388	0.598661	0.654038
ENSMUSG00000084704	0	0	0	0	0	0	0	0	0	0	0	0		0	0	0	0	0	0	0	0	0	0	0	0
ENSMUSG00000103060	0.074836	0.096089	0.0577655	0	0	0.0182528	0.330859	0.159014	0.262237	0.150019	0.169628	0.106798		0.32051	0.161946	0.203577	0	0	0.0773663	0.0201613	0.0657092	0.0423993	0.228772	0.0458975	0.0877502
ENSMUSG00000089866	0	0	0	0	0	0	0	0	0	0	0	0		0	0	0	0	0	0	0	0	0	0	0	0
ENSMUSG00000099669	0	0	0	0	0	0	0	0	0	0	0	0		0	0	0	0	0	0	0	0	0	0	0	0
ENSMUSG00000099702	0	0	0	0	0	0	0	0	0	0	0	0		0	0	0	0	0	0	0	0	0	0	0	0
ENSMUSG00000047496	4.13308	4.66307	4.76723	0.893171	1.03066	1.48432	1.36767	1.60329	1.79315	2.51894	1.97558	2.08858		4.67594	4.73194	4.55763	0.575257	1.09603	1.40093	1.36737	1.93259	1.68906	1.7248	1.46575	1.8923
ENSMUSG00000099582	0	0	0	0	0	0	0	0	0	0	0	0		0	0	0	0	0	0	0	0	0	0	0.395478	0
ENSMUSG00000097482	0.0317544	0.065236	0.0326814	0.0304937	0	0	0	0	0.0684754	0.07275	0.0359882	0		0	0	0	0	0	0.0328281	0.0342193	0	0.0359817	0.0388291	0.0389504	0.0744684
ENSMUSG00000101214	0	0.0398397	0	0.0558677	0	0.0567588	0	0.0206029	0	0.0222143	0.0439561	0.0221399		0.0207637	0	0.0211014	0	0	0	0.0208978	0	0.0659223	0	0	0
ENSMUSG00000067017	0.478094	0.396655	0.586677	0.635695	1.27752	1.14815	0.541978	0.683759	0.713745	0.463406	0.291759	0.839735		0.315015	0.437716	0.300131	0.709327	1.42098	0.836439	0.951148	0.430551	1.06264	0.58461	0.8571	0.495913
ENSMUSG00000056536	3.71103	4.36786	4.17743	6.47405	6.23754	6.11343	4.01438	4.09462	4.03875	4.1846	4.87612	4.81052		3.5885	3.98607	4.10116	4.54417	5.56962	5.35113	4.71559	4.54824	5.15996	3.92332	4.78434	5.0676
ENSMUSG00000100672	0.928099	0.834172	0.358197	0.779845	0.340561	0.679101	0.227958	0.616268	0.750509	0.531573	0.6574	0.927138		0.372646	0.62763	0.883652	0.588839	0.471842	0.839544	1.00014	0.81491	0	0.567436	0.426907	0.408097
ENSMUSG00000101219	0	0.196301	0	0	0	0	0	0	0	0.218911	0	0		0	0	0	0	0.194313	0.197566	0	0	0	0	0	0
ENSMUSG00000076999	0	0	0	0	0	0	0	0	0	0	0	0		0	0	0	0	0	0	0	0	0	0	0	0
ENSMUSG00000101656	0	0	0	0	0	0	0	0.0904925	0	0	0	0.0972432		0	0.0921608	0	0	0	0	0	0	0	0.104153	0	0
ENSMUSG00000026319	6.15154	6.11995	6.29126	7.88881	7.62709	7.19968	8.67968	8.42797	8.15356	7.05932	7.55477	8.19777		6.45026	6.53029	6.42277	7.35653	7.99292	7.92654	8.74532	9.41667	9.0453	8.33378	8.71268	8.63365
ENSMUSG00000104044	0.880922	1.26435	0.931477	1.20518	1.31071	1.2715	1.54127	1.23078	1.57434	1.28557	1.35396	1.51548		1.44712	1.34487	1.28682	1.4455	1.58284	1.43467	1.40445	1.58229	1.59985	1.6084	1.58382	1.69798
ENSMUSG00000101330	0	0	0	0	0	0	0	0	0	0	0	0		0	0	0	0	0	0	0	0	0	0	0	0
ENSMUSG00000026321	2.19522	1.90315	2.21412	10.8692	9.546	4.90019	5.90948	4.79509	3.93851	4.22461	3.45321	4.01999		2.35044	2.05221	1.65296	7.40733	6.99089	6.6994	4.00263	3.00175	3.1541	1.83606	1.8418	2.26516
ENSMUSG00000102690	0	0	0.0320046	0.0298622	0	0	0	0	0	0	0	0		0.0332956	0	0	0	0	0	0.0335106	0.0182029	0	0	0	0
ENSMUSG00000089206	0	0	0	0	0	0	0	0	0	0	0	0		0	0	0	0	0	0	0	0	0	0	0	0
ENSMUSG00000099448	0	0.100714	0.10091	0	0.0959416	0.191314	0	0	0	0	0	0.111939		0	0	0	0.298594	0	0.101363	0	0	0	0	0	0
ENSMUSG00000099843	0.630495	1.21909	1.06878	2.63554	2.25006	1.59208	1.38464	1.53671	1.3596	1.18957	1.13489	0.973873		1.11189	0.722328	1.2914	1.50597	1.35759	2.26217	1.3189	1.21575	1.09266	1.08842	1.00084	1.00023
ENSMUSG00000038866	5.32208	4.4388	5.36566	8.35159	8.49487	6.79692	7.28677	6.56093	5.73828	6.90521	6.04045	6.14694		5.11692	5.39756	5.90927	7.93066	7.06013	8.01243	5.84388	5.68572	5.45038	5.80579	5.9762	5.19435
ENSMUSG00000102501	0	0.0163041	0	0	0	0	0	0	0	0.036364	0	0		0	0	0	0	0	0	0	0	0	0	0	0
ENSMUSG00000097612	0.166309	0.341663	0.285273	0.0532354	0.108491	0.216338	0.544646	0.235586	0.418401	0.317514	0	0.18987		0.415492	0.179947	0.603216	0.168825	0.281836	0.286553	0.298697	0.324503	0.50253	0.474509	0.0679989	0.195008
ENSMUSG00000101583	0	0.0990511	0	0	0	0	0.189477	0.102447	0	0	0	0		0.103247	0	0	0	0	0	0	0.112891	0.218531	0	0.118281	0
ENSMUSG00000044340	5.2538	5.06889	5.83174	4.11092	4.67636	4.73842	7.17287	6.69808	6.22693	7.0882	6.58941	5.91815		5.47528	5.22145	5.57282	4.12442	4.9305	5.35098	5.09126	5.20307	4.53326	5.67243	4.79271	4.6728
ENSMUSG00000103291	2.12252	2.08213	2.54492	1.55926	1.56808	1.57378	2.66921	3.55163	2.64322	3.33097	3.19933	2.94422		2.35214	2.44585	2.18254	1.70216	2.21212	2.04069	2.21866	2.43518	2.00824	2.30991	2.3692	2.25236
ENSMUSG00000100247	0	0	0	0	0	0	0.0351959	0	0	0.0410366	0	0.0408992		0	0	0	0	0.0364255	0	0	0	0	0	0.043942	0.0420059
ENSMUSG00000099604	0	0	0	0	0	0	0	0	0	0	0	0		0	0	0	0	0	0	0	0.227032	0	0	0	0
ENSMUSG00000057329	9.03346	10.0632	9.4153	4.33741	5.04868	5.43125	9.54611	9.90827	7.85874	9.14482	8.30607	8.72106		8.91636	9.27125	9.42985	5.22011	5.93476	6.36041	7.78649	10.1524	9.33859	8.42138	8.14499	7.71881
ENSMUSG00000054006	0	0	0	0	0	0	0	0	0	0	0.0579382	0		0	0	0	0	0	0	0	0	0	0	0	0
ENSMUSG00000098344	0.772847	0.793865	0	0	0	0.377001	1.13895	0.821086	0.416643	0.885303	1.31383	0		0.827493	0	0.840954	0	1.17874	0.399489	0.416419	0.452395	0.437866	1.41755	0	0
ENSMUSG00000103348	2.39223	3.33674	3.16182	1.25745	1.52771	2.28477	3.43886	3.31739	2.76937	3.02878	2.91096	3.10489		2.88493	3.18783	3.17846	1.78937	2.12516	2.21279	2.11661	2.97752	2.9675	2.86362	2.31659	2.03735
ENSMUSG00000009905	6.00557	6.48032	6.07467	5.19104	4.65202	5.29273	5.27288	6.07888	5.3624	5.77104	5.65119	5.56024		6.02962	6.04438	5.90309	4.53141	4.67001	4.96824	4.78951	5.19574	5.15314	4.98511	5.03234	4.77278
ENSMUSG00000009907	6.82223	6.81984	6.59015	8.56326	7.87107	6.96679	8.67982	8.50204	7.3112	8.23407	8.5545	8.13238		7.25406	6.89	7.43628	8.12364	8.14294	8.1572	9.11978	8.96112	8.85389	8.50815	8.73019	9.47348
ENSMUSG00000067006	0	0	0	0	0	0	0	0	0	0	0	0		0	0	0	0.0193996	0	0	0	0	0.0216545	0	0	0
ENSMUSG00000083613	0	0	0	0	0	0	0	0	0	0	0	0		0	0	0	0	0	0	0	0	0	0	0	0
ENSMUSG00000059956	0	0	0	0	0	0	0	0	0	0.0722986	0.0238433	0.0480377		0	0	0.0228923	0.0640699	0	0	0.0453426	0.0492599	0	0	0	0
ENSMUSG00000048775	0	0	0	0	0	0	0	0	0	0	0	0		0	0	0	0	0	0	0	0	0	0.0384343	0	0
ENSMUSG00000084228	0	0	0	0	0	0	0	0	0	0	0	0		0	0	0	0	0	0	0	0	0	0	0	0
ENSMUSG00000044594	0	0	0	0	0	0	0	0	0	0	0	0		0	0	0	0	0	0	0	0	0	0	0	0
ENSMUSG00000058017	0	0	0	0	0	0	0	0	0	0	0	0		0	0	0	0	0	0	0	0	0	0.0528471	0	0
ENSMUSG00000083884	0.0723879	0.0743565	0	0.0695139	0.0708329	0.0706227	0	0	0	0	0	0.0826433		0	0.078324	0	0	0.0736035	0	0	0.0847461	0	0.0885153	0	0.169759
ENSMUSG00000073602	0	0	0	0	0	0	0	0	0	0	0	0		0	0	0	0	0	0	0	0	0	0	0	0
ENSMUSG00000080729	0	0	0	0	0	0	0	0	0	0	0	0		0	0	0	0	0	0	0	0	0	0	0	0
ENSMUSG00000081114	0	0	0	0	0	0	0	0	0	0	0	0		0	0	0	0	0	0.0736186	0	0	0	0	0.0873482	0.0834995
ENSMUSG00000073601	0	0	0	0	0	0	0	0	0	0	0	0		0	0	0	0	0	0	0	0	0	0	0	0
ENSMUSG00000084189	0	0	0	0	0	0	0	0	0	0	0	0		0	0	0	0	0	0	0	0	0	0	0	0
ENSMUSG00000026327	0	0	0	0	0	0	0.0236196	0	0	0	0	0		0	0	0	0	0	0	0	0	0	0	0	0
ENSMUSG00000087210	0	0	0	0	0	0	0	0	0	0	0	0		0	0	0	0	0	0	0	0	0	0	0	0
ENSMUSG00000067001	0	0	0	0	0	0	0	0	0	0	0.0304346	0.0306587		0	0	0	0.0272605	0	0.0277621	0	0	0.0304291	0.0328371	0.0329397	0
ENSMUSG00000089278	0	0	0	0	0	0	0	0	0	0	0	0		0	0	0	0	0	0	0	0	0	0	0	0
ENSMUSG00000062345	0.134237	0.0459624	0	1.07423	3.52464	0.960397	0	0.0237692	0.144734	0.0512564	0.0507113	0.0255424		0.0239547	0.0242074	0.17041	3.04331	3.27578	1.1102	0.0241094	0	0	0.0273572	0.0274427	0
ENSMUSG00000092572	0.376459	0.309357	0.170477	0.853169	1.10512	0.323205	0.0887664	0.127986	0.129887	0.241492	0.324255	0.257876		0.322461	0.293277	0.311322	1.78849	0.581826	0.653834	0.0973632	0.158662	0.0853149	0.257785	0.0554123	0.0529707
ENSMUSG00000026315	2.87154	1.98143	2.00785	4.7678	4.74029	2.19203	6.83766	7.65023	5.51862	5.96357	4.44685	4.65478		2.53477	2.37177	2.05126	2.94837	3.32095	3.22924	4.41725	3.36178	3.72574	3.84635	3.41472	3.26426
ENSMUSG00000086161	0	0	0	0	0	0	0	0	0	0	0	0		0	0	0	0	0	0	0	0	0	0	0	0
ENSMUSG00000096241	0	0	0	0	0	0	0	0	0	0	0	0		0	0	0	0	0	0	0	0	0	0	0	0
ENSMUSG00000077237	0	0	0	0	0	0	0.391155	0	0	0	0.451216	0.454538		0	0	0	0	0	0	0	0	0	0	0	0
ENSMUSG00000100457	0	0	0	0	0	0	0	0	0	0.0165888	0.0164124	0		0	0	0	0	0	0	0.0156057	0	0	0.0708318	0.0177633	0.0169806
ENSMUSG00000101477	0	0	0	0	0	0	0	0	0	0	0	0		0	0.0949303	0	0	0	0	0	0	0	0	0	0.102876
ENSMUSG00000099484	0	0	0	0	0	0	0	0	0	0	0	0		0	0	0	0	0	0	0	0	0	0	0	0
ENSMUSG00000100041	0	0.0437285	0.0219068	0.0613209	0.0624844	0	0	0.0904558	0.16065	0.170678	0.14474	0.121505		0.0227904	0.0460618	0.0694835	0.0432149	0.0432857	0	0.0458752	0	0.096476	0.130138	0.0783268	0.049917
ENSMUSG00000104478	0	0	0.0392509	0	0	0	0	0.020259	0	0.0218435	0	0.0217703		0	0	0	0	0	0	0	0	0	0	0	0
ENSMUSG00000101231	0	0	0	0	0	0	0	0	0	0	0	0		0	0	0	0	0	0	0	0	0	0	0	0
ENSMUSG00000101097	0	0	0.0289394	0	0	0	0	0	0	0	0	0.0321022		0	0	0	0	0	0	0	0	0	0	0	0
ENSMUSG00000100831	0	0	0	0	0	0	0	0	0	0	0	0		0	0	0	0	0	0	0	0	0	0	0	0
ENSMUSG00000100884	0	0	0	0	0	0	0	0	0	0	0	0		0	0	0	0	0	0	0	0	0	0	0	0
ENSMUSG00000089037	0	0	0	0	0	0	0	0	0	0	0	0		0	0	0	0	0	0	0	0	0	0	0	0
ENSMUSG00000084741	0	0	0	0	0	0	0	0	0	0	0	0		0	0	0	0	0	0	0	0	0	0	0.226186	0
ENSMUSG00000100025	0	0.0939922	0.18835	0.146451	0.119384	0.11903	0.0898998	0.12962	0	0.0698789	0.0691358	0.243757		0.0653158	0.0990074	0.0331891	0.185777	0.0310134	0.189195	0.0657376	0	0	0.261077	0.0374132	0.107294
ENSMUSG00000026312	0.015708	0.0322703	0.00538884	0.00502811	0.00512351	0.0102166	0.00514421	0.0111256	0	0.00599787	0.00593409	0		0.00560621	0.0113307	0.0170922	0.0106304	0.0106478	0	0	0	0.00593303	0	0	0.00613954
ENSMUSG00000100290	0	0	0	0	0	0	0	0	0	0	0	0		0	0	0	0	0	0	0	0	0	0.119446	0	0
ENSMUSG00000100758	0	0	0	0	0	0.0552501	0	0	0	0	0	0		0	0	0	0	0	0	0	0	0	0	0	0
ENSMUSG00000099926	0	0	0	0	0	0	0	0	0	0	0	0		0	0	0	0	0	0	0	0.0756773	0	0	0	0
ENSMUSG00000047216	89.5622	93.1961	92.2146	30.0798	27.827	40.8739	103.41	109.802	67.2812	100.259	92.9171	119.255		89.65	90.7155	87.9952	56.6021	62.5003	69.411	153.227	210.251	178.079	191.6	181.686	186.236
ENSMUSG00000102788	16.4537	20.3967	22.2959	4.885	5.28665	7.32459	25.3854	26.1838	15.4898	20.8773	16.8384	22.1091		15.7389	17.2905	17.2929	9.81149	11.2544	14.2173	36.8039	55.5292	42.3169	36.6569	37.1802	36.2413
ENSMUSG00000102160	17.5242	20.8574	23.2309	5.30463	6.3745	7.56352	26.125	25.5796	15.0746	20.3578	17.7235	23.7039		18.1107	19.9918	19.0685	10.5576	12.3567	14.7888	36.1269	54.5235	44.3116	36.5216	35.5609	37.7017
ENSMUSG00000101253	0	0	0	0	0	0	0	0	0	0	0	0		0	0.0978713	0	0	0	0	0	0	0	0.110606	0	0
ENSMUSG00000101846	0	0	0	0	0	0	0	0	0	0	0	0		0	0	0	0	0	0	0	0	0	0	0	0
ENSMUSG00000100555	0.930388	0.819163	0.93019	0.816868	0.754333	0.778029	1.77593	1.29912	1.94897	1.46162	1.05443	1.09255		0.939248	1.17926	1.24378	0.782558	0.837896	0.824439	1.20313	0.902501	1.08437	1.13767	0.978194	1.27796
ENSMUSG00000102728	0	0	0	0	0	0	0	0	0	0	0	0		0	0	0	0	0	0	0	0	0	0	0	0
ENSMUSG00000038702	13.5237	13.2451	13.4398	10.9113	10.3956	11.7082	21.9144	21.0527	19.3991	17.4449	18.7683	17.5219		15.7687	16.1325	15.1918	11.34	12.5268	12.7177	17.9637	16.1955	16.843	19.0456	18.2997	22.6687
ENSMUSG00000101875	0	0	0	0	0	0	0	0	0	0	0	0		0.0980305	0	0	0	0	0	0	0	0	0	0	0.107356
ENSMUSG00000099732	0	0.0289763	0.0290326	0.0135446	0.0276032	0.0137606	0.0138573	0.0149849	0	0.0646276	0	0.0161028		0	0	0	0	0	0	0	0	0.0159822	0.0172469	0	0.0165385
ENSMUSG00000101220	0	0	0	0	0	0	0	0	0	0	0	0		0	0	0	0	0	0	0	0	0	0	0	0
ENSMUSG00000100020	0	0	0.32534	0	0	0	0.0776428	0	0	0	0.179129	0.0902242		0	0	0	0	0	0	0	0	0	0	0	0
ENSMUSG00000101054	10.4479	12.5072	11.4805	1.4333	2.69038	3.29552	1.15768	1.58571	1.43988	3.50945	3.38311	3.4977		5.21481	8.83973	8.97521	0.877186	0.958496	1.29938	0.169306	0	0	0.288171	0.192714	0.460558
ENSMUSG00000088691	0	0	0	0	0	0	0	0	0	0	0	0		0	0	0	0	0	0	0	0	0	0	0	0
ENSMUSG00000099884	0	0	0	0	0	0	0	0	0	0	0	0		0	0	0	0	0	0	0	0	0	0	0	0
ENSMUSG00000100304	0	0	0	0	0	0	0	0	0	0	0	0		0	0	0	0	0	0	0	0	0	0	0	0
ENSMUSG00000101453	0	0	0	0	0	0	0	0	0	0	0	0		0	0	0	0	0	0	0	0	0	0	0	0
ENSMUSG00000102105	0	0	0	0	0	0	0	0	0	0	0	0		0	0	0	0	0	0	0	0	0	0	0	0
ENSMUSG00000099943	0	0	0	0	0	0	0	0	0	0	0	0		0	0	0	0	0	0	0	0	0	0	0	0
ENSMUSG00000084546	0	0	0	0	0	0	0	0	0	0	0	0		0	0	0	0	0	0	0	0	0	0	0	0
ENSMUSG00000097648	0	0	0	0	0	0	0	0	0	0	0	0		0	0	0	0	0	0	0	0	0	0	0	0
ENSMUSG00000101687	0	0	0	0	0	0	0	0	0	0	0	0		0	0	0	0	0	0	0	0	0	0	0	0
ENSMUSG00000100515	0	0	0	0	0	0	0	0	0	0	0	0		0	0	0	0	0	0	0.0270583	0	0	0	0	0
ENSMUSG00000070695	0.0624209	0.0690507	0.0395342	0.0184439	0.0328893	0.00468452	0.00471744	0.0102026	0.0103542	0.0165009	0.0217672	0.0328912		0.0411289	0.0415629	0.0522475	0.00487427	0.00488224	0.0198558	0	0	0	0.00587137	0	0
ENSMUSG00000092948	0	0	0	0	0	0	0	0	0	0	0	0		0	0	0	0	0	0	0	0	0	0	0	0
ENSMUSG00000102033	0	0	0	0	0	0	0	0	0	0	0	0		0	0	0	0	0	0	0	0	0	0	0	0
ENSMUSG00000094429	0	0	0	0	0	0	0	0	0	0	0	0		0	0	0	0	0	0	0	0	0	0	0	0
ENSMUSG00000101154	0	0	0	0	0	0	0	0	0	0	0	0		0	0	0	0	0	0	0	0	0	0	0	0
ENSMUSG00000065865	0	0	0	0	0	0	0	0	0	0	0	0		0	0	0	0	0	0	0	0	0	0	0	0
ENSMUSG00000098815	0	0	0	0	0	0	0	0	0	0	0	0		0	0	0	0	0	0	0	0	0	0	0	0
ENSMUSG00000101573	0	0	0	0	0	0	0	0	0	0	0	0		0	0	0	0	0	0	0	0	0	0	0	0
ENSMUSG00000107979	0	0	0	0	0	0	0	0	0	0	0	0		0	0	0	0	0	0	0	0	0	0	0	0
ENSMUSG00000101373	0	0	0	0	0	0	0	0	0	0	0	0		0	0	0	0	0	0	0	0	0.0237629	0	0	0
ENSMUSG00000099615	0	0	0	0	0	0	0	0	0	0	0	0		0	0	0	0	0	0	0	0	0	0	0	0
ENSMUSG00000100265	0	0	0	0	0	0	0	0	0	0	0	0		0	0	0	0	0	0	0	0	0	0	0	0
ENSMUSG00000100527	0	0	0	0	0	0	0	0	0	0	0	0		0	0	0	0	0	0	0	0	0	0	0	0
ENSMUSG00000099571	0	0	0	0	0	0	0	0	0	0	0	0		0	0	0	0	0	0	0	0	0	0	0	0
ENSMUSG00000101303	0	0	0	0	0	0	0	0	0	0	0	0		0	0	0	0	0	0	0	0	0	0	0	0
ENSMUSG00000100305	0	0	0	0	0	0	0	0	0	0	0	0		0	0	0	0	0	0	0	0	0	0	0.0432347	0
ENSMUSG00000099534	0	0	0	0	0	0	0	0	0	0	0.172639	0		0	0	0	0	0	0	0	0	0	0	0	0
ENSMUSG00000100886	0	0	0	0	0	0	0	0	0	0	0	0		0	0	0	0	0	0	0	0	0	0	0	0
ENSMUSG00000101415	0	0	0	0	0	0	0	0	0	0	0	0		0	0	0	0	0	0	0	0	0	0	0	0
ENSMUSG00000100617	0	0	0	0	0	0	0	0	0	0	0	0		0	0	0	0	0	0	0	0	0	0	0	0
ENSMUSG00000100703	0	0	0	0	0	0	0	0	0	0	0	0		0	0	0	0	0	0	0	0	0	0	0	0
ENSMUSG00000100177	0	0	0	0	0	0	0	0	0	0	0	0		0	0	0	0	0	0	0	0	0	0	0	0
ENSMUSG00000101363	0	0	0	0	0	0	0	0	0	0	0	0		0	0	0	0	0	0.158861	0	0	0	0	0	0
ENSMUSG00000101590	0	0	0	0	0	0	0	0	0	0	0	0		0	0	0	0	0	0	0	0	0	0	0	0
ENSMUSG00000102030	0	0	0	0	0.0128177	0	0	0	0	0	0	0		0	0	0	0	0	0	0	0	0	0	0.0160675	0
ENSMUSG00000099870	0	0	0	0.0433939	0	0	0	0.0480085	0	0	0	0		0	0	0	0	0	0	0	0	0	0	0	0.0529859
ENSMUSG00000026374	8.10439	8.14576	8.11377	9.44515	9.3117	8.32619	8.14498	8.11646	7.80484	8.4784	9.01374	8.19134		7.80035	7.83237	7.63645	8.32728	9.03204	8.57661	8.13246	8.39976	8.051	8.02033	7.77461	8.03151
ENSMUSG00000026377	7.54205	7.91199	8.31273	16.6426	17.2462	17.3777	10.4316	9.77447	8.76625	10.5083	9.39631	10.4731		7.96078	7.63964	8.73052	22.5613	19.4437	21.2069	10.8655	12.3051	11.6372	13.7027	11.1211	14.0493
ENSMUSG00000099936	0	0	0	0	0	0	0	0	0	0	0	0		0	0	0	0	0	0	0	0	0	0.0296686	0	0
ENSMUSG00000064302	4.1886	4.28521	4.65506	4.97879	4.82607	4.6404	8.88747	8.26363	7.63934	6.18983	6.18127	5.7983		5.0927	5.2896	5.0237	4.85034	5.35731	5.62357	8.62302	11.1537	10.7301	10.4377	9.75916	8.50823
ENSMUSG00000077257	0	0	0	0	0	0	0	0	0	0	0	0		0	0	0	0	0	0	0	0	0	0	0	0
ENSMUSG00000107722	0.341257	0.701076	0.702439	0.901199	1.16874	0.915573	0.251457	0.997033	0.551916	0.488641	0.580134	0.681808		0.730773	1.01541	0.742661	1.81871	0.954217	1.32298	0.919366	0.399517	1.16006	0.730251	1.25577	0.400147
ENSMUSG00000080542	0	0	0	0	0	0	0	0	0	0	0	0		0	0	0	0	0	0	0	0	0	0	0	0
ENSMUSG00000100770	0	0	0	0	0	0	0	0	0	0	0	0		0	0	0	0	0	0	0	0	0	0	0	0
ENSMUSG00000026380	0.384213	0.394661	0.372505	0.160417	0.179807	0.119515	0.15865	0.31354	0.396248	0.56769	0.435439	0.49586		0.315987	0.349446	0.248419	0.0847884	0.101913	0.109375	0.11401	0.0325947	0.0946437	0.0885153	0.0956221	0.097938
ENSMUSG00000089601	0	0	0	0	0	0	0	0	0	0	0	0		0	0	0	0	0	0	0	0	0	0	0	0
ENSMUSG00000101624	0	0	0	0	0	0	0	0	0	0	0	0		0.179202	0	0	0	0.340358	0	0	0.195942	0	0	0	0
ENSMUSG00000088363	0	0	0	0	0	0	0	0	0	0	0	0		0	0	0	0	0	0	0	0	0	0	0	0
ENSMUSG00000100040	0	0	0	0	0	0	0	0	0	0	0	0		0	0	0	0	0	0	0	0	0	0	0	0
ENSMUSG00000048402	1.31594	1.19455	1.2205	1.23431	1.75932	1.47046	1.28536	1.34118	1.82306	2.0508	3.15621	1.21413		1.46633	1.26657	1.32369	1.07956	1.57142	1.35253	2.2673	2.06011	2.4881	1.31911	1.42646	0.968881
ENSMUSG00000098273	0	0	0	0	0	0	0	0	0	0	0	0		0	0	0	0	0	0	0	0	0	0	0	0
ENSMUSG00000097408	0.0761647	0.078236	0.156776	0.0731407	0.111793	0.111461	0.0374148	0	0	0.130871	0.345278	0.0434776		0.08155	0	0.0828766	0	0.0774437	0	0	0.0891676	0.172608	0.0931335	0.140137	0
ENSMUSG00000096939	0	0	0.0551916	0	0	0	0	0	0	0	0	0		0	0.0580237	0	0	0	0	0	0	0	0.0655736	0	0
ENSMUSG00000100767	0	0	0	0	0	0	0	0	0	0	0	0		0.0710474	0	0	0	0	0	0	0.0776839	0	0.162278	0.0813926	0.0778063
ENSMUSG00000099860	0	0	0	0	0	0	0	0	0	0	0	0		0	0	0	0	0	0	0	0	0	0	0	0
ENSMUSG00000101179	0	0	0	0	0	0.0131873	0	0	0	0	0	0		0	0	0	0	0.0274877	0.0139739	0	0	0	0	0	0
ENSMUSG00000037035	1.28451	0.86271	1.48726	1.81468	2.88848	2.59072	1.03144	0.47239	0.705796	0.764003	0.615901	0.549933		1.34888	1.22948	1.38426	2.92134	3.15217	2.41327	1.15795	0.795279	1.11962	0.815548	0.363598	0.883426
ENSMUSG00000004451	6.22542	6.07717	6.50589	12.5093	13.5916	9.89042	8.0643	7.72387	7.53979	7.96162	7.38163	7.84978		6.77974	6.07848	5.38211	11.806	11.8362	10.7008	8.33986	6.51448	6.43814	6.55656	6.85164	6.72474
ENSMUSG00000101437	0	0	0	0	0	0	0	0	0	0	0	0		0	0	0	0	0	0	0	0	0	0	0	0
ENSMUSG00000098447	0.346317	0.0889338	0.178213	0.997702	0.338878	0.253404	0.340247	0.459916	0.840149	0.495887	0.588736	0.790762		0.278103	0	0.094209	0.527336	0.616232	0.26852	0.1866	0	0.490525	0.635211	0.849594	0
ENSMUSG00000098923	4.33605	4.16723	4.67331	9.41791	9.46914	8.69665	8.04471	7.1374	5.69844	5.94758	6.15852	6.14013		4.66256	4.26877	4.75866	9.88012	9.57461	9.63866	5.91598	6.10028	6.38937	5.93924	6.36869	6.02261
ENSMUSG00000101731	0.0797173	0.0818852	0.246133	0.0191381	0.0780048	0.136103	0.21538	0.105866	0.0429757	0.0456584	0.0451729	0.136517		0.0426769	0.107818	0.0650568	0.0606927	0.060792	0.0618095	0.0859051	0.13999	0.0677472	0.0974776	0.0488911	0.0701053
ENSMUSG00000084505	0	0	0	0	0.494468	0	0	0	0	0	0.572697	0		0	0	0.549855	0	0.513809	0.522409	0	0	0	0	0	0
ENSMUSG00000026383	1.58822	2.0923	1.68956	0.878849	1.17429	1.30282	1.71082	1.57385	1.49741	1.72142	1.74347	1.67906		1.57469	1.62598	1.59643	0.925417	1.19849	1.22592	1.24717	1.61339	1.84	1.3368	1.33224	1.27771
ENSMUSG00000102687	0.283767	0.233187	0.292051	0	0.111068	0	0.278793	0.602957	0.673107	0.130023	0.321601	0.259175		0.364597	0.307037	0.432283	0.115224	0.173119	0.176017	0.428111	0.465097	0.257235	0.27759	0.348072	0.266188
ENSMUSG00000026384	7.20924	5.579	6.67438	4.64506	5.0012	6.05066	5.73744	5.70126	5.32048	5.40801	5.70825	6.49756		8.27566	5.69084	5.65232	5.61716	6.0134	6.00366	5.23759	5.80964	5.92289	5.88639	6.05853	5.94399
ENSMUSG00000091876	0	0	0	0	0	0	0	0	0	0	0	0		0	0	0	0	0	0	0	0	0	0	0	0
ENSMUSG00000103146	0.682431	0.753895	0.907758	0.58733	0.762267	0.866783	1.02468	0.971261	0.749681	0.766981	0.773418	0.882015		0.772043	0.759291	0.700538	0.73197	0.896821	0.94511	0.839469	1.28131	0.977542	0.873833	0.955533	0.875686
ENSMUSG00000100436	0	0	0	0	0	0	0	0	0	0	0	0		0	0	0	0	0	0	0	0	0	0	0	0
ENSMUSG00000090277	0	0	0	0	0	0	0	0	0	0	0	0		0	0.156648	0	0	0	0.149671	0	0	0	0	0	0
ENSMUSG00000100042	0	0	0	0	0	0	0	0	0	0.261742	0	0		0	0	0	0	0	0	0	0.267503	0	0	0	0
ENSMUSG00000100636	0	0	0	0	0	0	0.0777597	0	0	0	0	0		0	0.0856374	0	0	0	0	0	0.0926591	0	0	0	0
ENSMUSG00000101224	0	0	0	0	0	0	0	0	0	0	0	0		0	0	0	0	0	0	0.0730748	0	0	0	0	0
ENSMUSG00000036975	2.09208	1.6804	1.27894	1.32927	1.46224	1.27375	2.42631	2.22266	1.98432	2.07216	1.76489	2.31664		1.88632	1.42967	1.52333	1.50099	1.69537	1.30094	1.64424	2.22826	2.04975	2.17349	2.31534	1.88132
ENSMUSG00000036962	0.0180287	0.037038	0.055665	0.0173129	0	0.0351781	0	0	0	0	0.0204324	0		0.0386069	0	0.0196175	0	0.0183314	0.0186383	0	0.0211066	0.0204287	0.0220453	0.0221142	0.0211398
ENSMUSG00000092245	0	0	0	0	0	0	0	0	0	0	0	0		0	0	0	0	0	0	0	0	0	0	0	0
ENSMUSG00000026387	0.444041	0.187813	0.564535	0.175581	0.434503	0.560629	0.153973	0.277504	0.366115	0.179525	0.296026	0.268386		0.978844	0.367407	0.511594	0.265153	0.239028	0.378045	0.225181	0.0917381	0.177584	0.255515	0.0961177	0.275648
ENSMUSG00000050777	2.36511	1.27648	1.60902	4.96587	3.3734	1.68169	3.9384	3.49228	2.37718	2.70926	2.54415	3.02055		1.84561	1.64821	1.22134	2.4009	2.52711	1.40903	2.76469	1.50177	1.99862	1.12741	1.03259	1.59815
ENSMUSG00000026385	157.106	131.73	149.027	75.0618	91.5302	74.4924	124.542	121.445	83.441	130.816	125.027	161.516		154.326	114.046	116.099	95.2176	85.2273	79.5854	78.8958	84.2409	92.4236	100.37	97.9184	98.3708
ENSMUSG00000026388	1.47185	0.867105	1.24749	0.935346	0.614216	0.549042	1.6587	1.6557	0.980174	1.41328	1.61902	1.33441		1.39052	1.45203	1.22472	1.25242	1.0564	1.0517	0.909673	1.69778	1.56968	1.82623	1.80539	1.54818
ENSMUSG00000026389	12.0556	8.54846	9.72918	12.151	10.7348	10.5236	16.9669	22.0893	16.6074	21.963	16.4351	19.0023		15.3104	9.88017	10.9367	24.5227	16.8116	18.4619	25.2396	22.5648	22.7154	25.8285	19.8747	22.665
ENSMUSG00000036907	0	0.0269914	0.0270439	0.0504671	0.0514247	0.12818	0.154897	0.335003	0.141658	0.331103	0.327583	0.389994		0.281348	0.341179	0.171555	1.2537	0.881696	1.00511	1.21761	1.5689	1.04212	1.79934	1.1281	0.893528
ENSMUSG00000101275	0	0	0	0	0	0	0	0	0	0	0	0		0	0	0	0	0	0	0	0	0.0864921	0	0	0
ENSMUSG00000026390	0	0	0.11239	0.3146	0.694567	0.266349	0.026822	0.0290046	0	0	0	0		0.0584618	0.0590787	0.0297064	0.110855	0.166554	0.0846709	0.0588394	0	0.030935	0	0.0334873	0
ENSMUSG00000058665	0.0801122	0	0.0824509	0.403891	0.509543	0.136778	0.098385	0.0212781	0.15116	0.206481	0.0907934	0.160058		0.107221	0.0866818	0.043586	0.162649	0.549838	0.310578	0.539567	0.187578	0.295026	0.0979606	0.1474	0.0704527
ENSMUSG00000099957	0	0	0	0.0445429	0	0	0	0	0	0	0	0		0	0	0	0	0.0471634	0.0479528	0	0	0	0	0	0
ENSMUSG00000101386	0	0	0	0	0	0	0	0	0	0	0	0		0	0	0	0	0	0	0	0	0	0	0	0
ENSMUSG00000101922	0	0	0	0	0	0	0	0	0	0	0	0		0	0	0	0	0	0	0	0	0	0	0	0
ENSMUSG00000100761	0	0	0	0	0	0	0	0	0	0	0	0		0	0	0	0	0	0	0	0	0	0	0	0
ENSMUSG00000099336	0	0	0	0	0	0	0	0	0	0	0	0		0	0	0	0	0	0	0	0	0	0	0	0
ENSMUSG00000100979	0	0	0	0	0	0	0	0	0	0	0	0		0	0	0	0	0	0	0	0	0	0	0	0
ENSMUSG00000102360	0	0	0	0.032507	0	0.0165128	0	0	0	0	0	0		0	0	0	0.0171816	0.0172097	0.0174978	0.0364786	0.019815	0	0	0.041522	0.0198462
ENSMUSG00000097881	0	0	0.0139545	0	0	0	0.0133211	0.014405	0.0584762	0	0	0		0	0	0	0	0	0	0	0	0	0	0	0
ENSMUSG00000101700	0	0	0	0	0	0	0	0	0	0	0	0		0	0	0	0	0	0	0	0	0	0	0	0
ENSMUSG00000104332	0.378084	0.621385	0.155648	0.435687	0.591939	0.221318	0.445748	0.482019	0.48918	0.346478	0.342794	0.345318		0.48578	0.32727	0.740524	0.307044	0.307546	0.0781734	1.05932	0.442631	0.428416	0.462317	0.556515	0.443328
ENSMUSG00000003721	6.94561	7.2433	6.79018	6.87329	7.24062	7.5144	8.63762	8.45626	7.71719	8.71895	8.33469	9.03528		7.37191	7.76078	7.47536	7.88021	7.04686	7.07095	9.21325	8.06052	8.21317	8.91861	8.57526	8.16193
ENSMUSG00000104253	1.20299	1.07683	0.902053	0.792159	0.639025	0.620362	1.0806	1.4424	0.982067	1.24024	1.22705	1.11836		1.19605	0.873961	0.953705	0.697827	0.78634	1.13707	1.27785	1.50897	1.36314	1.15579	0.927525	1.32998
ENSMUSG00000101791	0	0	0	0.0579749	0	0	0	0	0	0	0	0		0	0	0.032846	0	0.0613856	0.0312065	0.032529	0	0	0	0	0.0707899
ENSMUSG00000026339	3.32908	3.57055	3.45935	4.49332	4.32246	3.60182	5.35498	5.13701	4.38157	5.07589	4.82416	4.95405		3.35798	3.57227	3.50754	4.38631	4.46819	4.15846	5.13136	5.33276	4.77647	4.88493	4.79882	4.15125
ENSMUSG00000085857	0	0	0	0	0	0	0	0	0	0	0	0		0	0	0	0	0	0	0	0	0	0	0	0
ENSMUSG00000083582	0	0	0	0	0	0	0	0	0	0	0	0		0	0	0	0	0	0	0	0	0	0	0	0
ENSMUSG00000050534	0.0271595	0	0	0	0	0	0.0266834	0	0	0	0	0		0	0	0	0	0	0	0	0	0	0	0	0
ENSMUSG00000081130	0	0.116092	0.116318	0.108531	0	0	0	0	0	0.129464	0	0		0	0	0	0	0.114916	0	0.243583	0.132313	0.128064	0.276396	0.27726	0.132522
ENSMUSG00000001674	2.2012	1.91321	2.00406	4.36989	4.55636	4.54284	3.07757	2.78832	2.51026	2.49725	1.84702	2.63387		2.0849	2.54201	2.257	4.9417	4.71306	4.41996	2.82823	2.84956	2.90194	2.66573	2.7779	3.15186
ENSMUSG00000102006	0	0	0	0	0	0	0	0	0	0	0	0		0	0	0	0	0	0	0	0	0	0	0	0
ENSMUSG00000102488	0	0	0	0	0	0	0	0	0	0	0	0		0	0	0	0	0	0	0	0	0	0	0	0
ENSMUSG00000083584	0	0	0	0	0	0	0	0	0	0	0	0		0	0	0	0	0.0408533	0	0	0	0	0	0	0
ENSMUSG00000100913	0.188815	0.2586	0.0647758	0.0604397	0.0615865	0.122807	0	0.0668669	0	0.0720966	0	0		0	0	0.0684849	0	0.0639954	0.195199	0.0678239	0	0	0.153921	0	0.147599
ENSMUSG00000080410	0	0	0	0	0	0	0	0	0	0	0	0		0	0	0	0	0	0	0	0	0	0	0	0
ENSMUSG00000099960	0	0	0	0	0	0	0	0	0	0	0	0		0	0	0	0	0	0	0	0	0	0	0	0
ENSMUSG00000089274	0	0	0	0	0	0	0	0	0	0	0	0		0	0	0	0	0	0	0	0	0	0	0	0
ENSMUSG00000103263	0	0	0	0	0	0	0	0	0	0	0	0		0	0	0	0	0	0	0	0	0	0	0	0
ENSMUSG00000089190	0	0	0	0	0	0	0	0	0	0	0	0		0	0	0	0	0	0	0	0	0	0	0	0
ENSMUSG00000099451	0	0	0	0	0	0	0	0	0	0	0	0		0	0	0	0	0	0	0	0	0	0	0	0
ENSMUSG00000104180	0	0	0	0	0	0	0	0	0	0	0	0		0	0	0	0	0	0	0	0	0	0	0	0
ENSMUSG00000100762	0	0	0	0	0	0	0	0	0	0	0	0		0	0	0	0	0	0	0	0	0	0	0	0
ENSMUSG00000100405	0	0	0	0	0	0	0	0	0	0	0	0		0	0	0	0	0	0	0	0	0	0	0	0
ENSMUSG00000100525	0	0	0	0	0	0	0	0	0	0	0	0		0	0	0	0	0	0	0	0	0	0	0	0
ENSMUSG00000101495	0.224588	0	0	0	0	0	0	0	0	0	0	0		0	0.243005	0.24438	0	0	0	0	0	0	0	0	0.263344
ENSMUSG00000036815	0.109875	0.0649819	0.0342675	0.00959208	0.00325803	0.00649672	0.00981356	0.00707474	0.0107698	0	0.00377347	0.00380126		0.0142599	0.0180129	0.0289837	0.00337993	0.0135419	0.0137685	0.010764	0.00389798	0.00754559	0	0.00816814	0.0117124
ENSMUSG00000102801	0	0	0	0	0	0	0	0	0	0	0	0		0	0	0	0	0	0	0	0	0	0	0.0184443	0
ENSMUSG00000102681	0	0	0	0	0	0	0	0	0	0	0	0		0	0	0	0	0	0	0	0	0	0	0	0
ENSMUSG00000077472	0	0	0	0	0	0	0	0	0	0	0	0		0	0	0	0	0	0	0	0	0	0	0	0
ENSMUSG00000104410	0	0	0	0	0	0	0	0	0	0	0	0		0	0	0	0	0	0	0	0	0	0	0	0
ENSMUSG00000102521	0.0163311	0	0	0	0	0	0	0	0	0	0	0		0	0	0	0	0	0	0	0	0	0	0	0
[truncated: 52,841 more rows]
