# Supplementary material for: A genetic compensatory mechanism regulated by Jun and Mef2d modulates the expression of distinct class IIa Hdacs to ensure peripheral nerve myelination and repair
Source: eLife. 2022 Jan 25;11:e72917. doi: 10.7554/eLife.72917 (PMC8853665; doi:10.7554/eLife.72917)
Supplement: Source data 3. [file elife-72917-data3.xlsx]

## Sheet: sample_4_new_annotation
PeakID	Chr	Start	End	Strand	Peak Score	Focus Ratio/Region Size	Annotation	Detailed Annotation	Distance to TSS	Nearest PromoterID	Entrez ID	Nearest Unigene	Nearest Refseq	Nearest Ensembl	Gene Name	Gene Alias	Gene Description	Gene Type
NA_peak_1930	2	80768634	80768634	+	7109863	NA	Intergenic	Intergenic	92736	ENSRNOT00000085119	ENSRNOG00000055866	ENSRNOT00000085119			AABR07008948.1			lincRNA
NA_peak_1701	18	69671235	69671235	+	6825072	NA	promoter-TSS (ENSRNOT00000082484)	protein_coding-promoter-TSS (ENSRNOT00000082484)	-36	ENSRNOT00000082484	ENSRNOG00000051965	ENSRNOT00000082484			Smad4			protein_coding
NA_peak_385	1	261090296	261090296	+	6203932	NA	exon (ENSRNOT00000072055, exon 1 of 1)	protein_coding-exon (ENSRNOT00000072055, exon 1 of 1)	141	ENSRNOT00000072055	ENSRNOG00000045543	ENSRNOT00000072055			Frat2			protein_coding
NA_peak_2934	5	146907364	146907364	+	5801893	NA	intron (ENSRNOT00000067912, intron 8 of 13)	protein_coding-intron (ENSRNOT00000067912, intron 8 of 13)	24608	ENSRNOT00000067912	ENSRNOG00000006004	ENSRNOT00000067912			Phc2			protein_coding
NA_peak_1698	18	65814281	65814281	+	5663864	NA	exon (ENSRNOT00000016112, exon 2 of 8)	protein_coding-exon (ENSRNOT00000016112, exon 2 of 8)	255	ENSRNOT00000016112	ENSRNOG00000011853	ENSRNOT00000016112			Mbd2			protein_coding
NA_peak_983	12	52289952	52289952	+	5601260	NA	Intergenic	Intergenic	-66880	ENSRNOT00000050252	ENSRNOG00000030721	ENSRNOT00000065893			Fbrsl1			protein_coding
NA_peak_3741	9	10014048	10014048	+	5577295	NA	exon (ENSRNOT00000072033, exon 1 of 19)	protein_coding-exon (ENSRNOT00000072033, exon 1 of 19)	118	ENSRNOT00000072033	ENSRNOG00000047628	ENSRNOT00000072033			Khsrp			protein_coding
NA_peak_159	1	134887718	134887718	+	5395553	NA	promoter-TSS (ENSRNOT00000076482)	lincRNA-promoter-TSS (ENSRNOT00000076482)	123	ENSRNOT00000076147	ENSRNOG00000051039	ENSRNOT00000076561			LOC108349594			lincRNA
NA_peak_3434	7	120919809	120919809	+	5210118	NA	promoter-TSS (ENSRNOT00000019612)	protein_coding-promoter-TSS (ENSRNOT00000019612)	-548	ENSRNOT00000019612	ENSRNOG00000014440	ENSRNOT00000019612			Josd1			protein_coding
NA_peak_3584	8	56696882	56696882	+	5207901	NA	promoter-TSS (ENSRNOT00000016637)	protein_coding-promoter-TSS (ENSRNOT00000016637)	86	ENSRNOT00000016637	ENSRNOG00000012470	ENSRNOT00000080043			Zc3h12c			protein_coding
NA_peak_1551	17	31236911	31236911	+	5023959	NA	exon (ENSRNOT00000023149, exon 1 of 11)	protein_coding-exon (ENSRNOT00000023149, exon 1 of 11)	896	ENSRNOT00000023149	ENSRNOG00000017210	ENSRNOT00000023149			Slc22a23			protein_coding
NA_peak_3583	8	56571092	56571092	+	4866480	NA	Intergenic	Intergenic	-14304	ENSRNOT00000085316	ENSRNOG00000012237	ENSRNOT00000034924			Rdx			protein_coding
NA_peak_1832	19	55197564	55197564	+	4866480	NA	promoter-TSS (ENSRNOT00000045657)	protein_coding-promoter-TSS (ENSRNOT00000045657)	-140	ENSRNOT00000045657	ENSRNOG00000028501	ENSRNOT00000045657			Zc3h18			protein_coding
NA_peak_2453	3	150990063	150990063	+	4810451	NA	Intergenic	Intergenic	1185	ENSRNOT00000079612	ENSRNOG00000054947	ENSRNOT00000079612			U1			snRNA
NA_peak_3368	7	71036659	71036659	+	4781675	NA	promoter-TSS (ENSRNOT00000005685)	protein_coding-promoter-TSS (ENSRNOT00000005685)	94	ENSRNOT00000005685	ENSRNOG00000004306	ENSRNOT00000005685			Zbtb39			protein_coding
NA_peak_1165	14	71383605	71383605	+	4669395	NA	Intergenic	Intergenic	-40478	ENSRNOT00000004274	ENSRNOG00000003174	ENSRNOT00000004274			Tapt1			protein_coding
NA_peak_1344	15	70732614	70732614	+	4669395	NA	Intergenic	Intergenic	-57511	ENSRNOT00000012440	ENSRNOG00000009034	ENSRNOT00000012440			Tdrd3			protein_coding
NA_peak_2983	5	155728072	155728072	+	4669395	NA	intron (ENSRNOT00000029025, intron 1 of 5)	protein_coding-intron (ENSRNOT00000029025, intron 1 of 5)	228	ENSRNOT00000029025	ENSRNOG00000013536	ENSRNOT00000018118			Cdc42			protein_coding
NA_peak_110	1	89041982	89041982	+	4420857	NA	promoter-TSS (ENSRNOT00000073825)	miRNA-promoter-TSS (ENSRNOT00000073825)	194	ENSRNOT00000080842	ENSRNOG00000055525	ENSRNOT00000080842			Kmt2b			protein_coding
NA_peak_2439	3	147879927	147879927	+	4359742	NA	exon (ENSRNOT00000009859, exon 1 of 1)	protein_coding-exon (ENSRNOT00000009859, exon 1 of 1)	211	ENSRNOT00000009859	ENSRNOG00000007520	ENSRNOT00000009859			Zcchc3			protein_coding
NA_peak_2719	4	157439203	157439203	+	4359742	NA	exon (ENSRNOT00000081802, exon 1 of 5)	protein_coding-exon (ENSRNOT00000081802, exon 1 of 5)	304	ENSRNOT00000081802	ENSRNOG00000060098	ENSRNOT00000081802			Ptms			protein_coding
NA_peak_219	1	177496099	177496099	+	4308345	NA	intron (ENSRNOT00000021020, intron 1 of 12)	protein_coding-intron (ENSRNOT00000021020, intron 1 of 12)	317	ENSRNOT00000021020	ENSRNOG00000015488	ENSRNOT00000090042			Tead1			protein_coding
NA_peak_2789	5	50362208	50362208	+	4259075	NA	exon (ENSRNOT00000035808, exon 1 of 8)	protein_coding-exon (ENSRNOT00000035808, exon 1 of 8)	136	ENSRNOT00000035808	ENSRNOG00000031031	ENSRNOT00000035808			Zfp292			protein_coding
NA_peak_1614	18	1971198	1971198	+	4250884	NA	promoter-TSS (ENSRNOT00000092027)	protein_coding-promoter-TSS (ENSRNOT00000092027)	284	ENSRNOT00000018025	ENSRNOG00000013281	ENSRNOT00000092027			Mib1			protein_coding
NA_peak_3643	8	78655730	78655730	+	4153780	NA	exon (ENSRNOT00000081185, exon 1 of 21)	protein_coding-exon (ENSRNOT00000081185, exon 1 of 21)	126	ENSRNOT00000081185	ENSRNOG00000057754	ENSRNOT00000087270			Tcf12			protein_coding
NA_peak_1519	17	10828378	10828378	+	4153780	NA	Intergenic	Intergenic	-9543	ENSRNOT00000091046	ENSRNOG00000000105	ENSRNOT00000091046			Cplx2			protein_coding
NA_peak_1721	18	79769506	79769506	+	4153780	NA	Intergenic	Intergenic	-4102	ENSRNOT00000088484	ENSRNOG00000016258	ENSRNOT00000021768			Zfp516			protein_coding
NA_peak_1096	14	5194863	5194863	+	4132256	NA	Intergenic	Intergenic	-93686	ENSRNOT00000002888	ENSRNOG00000002121	ENSRNOT00000002888			Lrrc8d			protein_coding
NA_peak_878	12	14244485	14244485	+	4132256	NA	promoter-TSS (ENSRNOT00000001466)	protein_coding-promoter-TSS (ENSRNOT00000001466)	-169	ENSRNOT00000001466	ENSRNOG00000001104	ENSRNOT00000001466			Foxk1			protein_coding
NA_peak_3516	7	143810153	143810153	+	4085343	NA	promoter-TSS (ENSRNOT00000016240)	protein_coding-promoter-TSS (ENSRNOT00000016240)	-739	ENSRNOT00000016240	ENSRNOG00000012192	ENSRNOT00000016240			Znf740			protein_coding
NA_peak_2794	5	58938571	58938571	+	4030287	NA	exon (ENSRNOT00000080909, exon 1 of 10)	protein_coding-exon (ENSRNOT00000080909, exon 1 of 10)	956	ENSRNOT00000080909	ENSRNOG00000053729	ENSRNOT00000080909			Tesk1			protein_coding
NA_peak_2232	3	3433838	3433838	+	4030287	NA	promoter-TSS (ENSRNOT00000078020)	protein_coding-promoter-TSS (ENSRNOT00000078020)	189	ENSRNOT00000024163	ENSRNOG00000017883	ENSRNOT00000078020			Camsap1			protein_coding
NA_peak_3826	9	69887113	69887113	+	3999809	NA	Intergenic	Intergenic	-8407	ENSRNOT00000035879	ENSRNOG00000024272	ENSRNOT00000035879			Ino80d			protein_coding
NA_peak_409	1	267359723	267359723	+	3999809	NA	promoter-TSS (ENSRNOT00000015495)	protein_coding-promoter-TSS (ENSRNOT00000015495)	-107	ENSRNOT00000015495	ENSRNOG00000011339	ENSRNOT00000015495			Slk			protein_coding
NA_peak_105	1	85517199	85517199	+	3957355	NA	exon (ENSRNOT00000026114, exon 1 of 1)	protein_coding-exon (ENSRNOT00000026114, exon 1 of 1)	161	ENSRNOT00000026114	ENSRNOG00000019310	ENSRNOT00000026114			Eid2			protein_coding
NA_peak_924	12	37668456	37668456	+	3916286	NA	promoter-TSS (ENSRNOT00000001419)	protein_coding-promoter-TSS (ENSRNOT00000001419)	87	ENSRNOT00000001419	ENSRNOG00000001070	ENSRNOT00000001419			Cdk2ap1			protein_coding
NA_peak_859	12	9331364	9331364	+	3916286	NA	promoter-TSS (ENSRNOT00000044134)	protein_coding-promoter-TSS (ENSRNOT00000044134)	-169	ENSRNOT00000044134	ENSRNOG00000000942	ENSRNOT00000044134			Pan3			protein_coding
NA_peak_1547	17	27664122	27664122	+	3845105	NA	intron (ENSRNOT00000060218, intron 2 of 12)	protein_coding-intron (ENSRNOT00000060218, intron 2 of 12)	1144	ENSRNOT00000060218	ENSRNOG00000015701	ENSRNOT00000060218			Rreb1			protein_coding
NA_peak_3798	9	46657674	46657674	+	3845105	NA	promoter-TSS (ENSRNOT00000019180)	protein_coding-promoter-TSS (ENSRNOT00000019180)	99	ENSRNOT00000083322	ENSRNOG00000014013	ENSRNOT00000019180			Map4k4			protein_coding
NA_peak_1268	15	19876184	19876184	+	3838341	NA	intron (ENSRNOT00000086368, intron 1 of 16)	protein_coding-intron (ENSRNOT00000012400, intron 1 of 14)	205	ENSRNOT00000012400	ENSRNOG00000009102	ENSRNOT00000086368			Fermt2			protein_coding
NA_peak_3440	7	122818331	122818331	+	3794505	NA	promoter-TSS (ENSRNOT00000000206)	protein_coding-promoter-TSS (ENSRNOT00000000206)	-346	ENSRNOT00000063202	ENSRNOG00000041449	ENSRNOT00000063202						miRNA
NA_peak_1497	17	6840783	6840783	+	3784538	NA	exon (ENSRNOT00000061233, exon 1 of 11)	protein_coding-exon (ENSRNOT00000061233, exon 1 of 11)	320	ENSRNOT00000061233	ENSRNOG00000019282	ENSRNOT00000061233			Ubqln1			protein_coding
NA_peak_3760	9	16738096	16738096	+	3782001	NA	exon (ENSRNOT00000061430, exon 1 of 7)	protein_coding-exon (ENSRNOT00000061430, exon 1 of 7)	454	ENSRNOT00000061430	ENSRNOG00000018232	ENSRNOT00000061430			Srf			protein_coding
NA_peak_2935	5	146985507	146985507	+	3782001	NA	Intergenic	Intergenic	-11575	ENSRNOT00000007761	ENSRNOG00000043364	ENSRNOT00000007761			Zfp362			protein_coding
NA_peak_1470	16	81706353	81706353	+	3782001	NA	TTS (ENSRNOT00000092552)	protein_coding-TTS (ENSRNOT00000092552)	311	ENSRNOT00000026580	ENSRNOG00000019629	ENSRNOT00000092248			Lamp1			protein_coding
NA_peak_2178	20	22914099	22914099	+	3782001	NA	intron (ENSRNOT00000067920, intron 1 of 7)	protein_coding-intron (ENSRNOT00000067920, intron 1 of 7)	405	ENSRNOT00000067920	ENSRNOG00000000645	ENSRNOT00000067920			Reep3			protein_coding
NA_peak_1684	18	56014046	56014046	+	3758841	NA	Intergenic	Intergenic	-21161	ENSRNOT00000025881	ENSRNOG00000019014	ENSRNOT00000025881			Ndst1			protein_coding
NA_peak_1581	17	63913918	63913918	+	3747468	NA	Intergenic	Intergenic	-34747	ENSRNOT00000045183	ENSRNOG00000014670	ENSRNOT00000049391			Zmynd11			protein_coding
NA_peak_3690	8	115621234	115621234	+	3745998	NA	exon (ENSRNOT00000018995, exon 1 of 2)	protein_coding-exon (ENSRNOT00000018995, exon 1 of 2)	160	ENSRNOT00000018995	ENSRNOG00000014161	ENSRNOT00000018995			Rbm15b			protein_coding
NA_peak_1752	19	21372437	21372437	+	3701630	NA	intron (ENSRNOT00000020329, intron 1 of 1)	protein_coding-intron (ENSRNOT00000020329, intron 1 of 1)	274	ENSRNOT00000020329	ENSRNOG00000015143	ENSRNOT00000020329			Siah1			protein_coding
NA_peak_338	1	229639005	229639005	+	3695329	NA	exon (ENSRNOT00000016804, exon 1 of 11)	protein_coding-exon (ENSRNOT00000016804, exon 1 of 11)	182	ENSRNOT00000016804	ENSRNOG00000012524	ENSRNOT00000016804			Zfp91			protein_coding
NA_peak_336	1	228395542	228395542	+	3695329	NA	promoter-TSS (ENSRNOT00000065411)	protein_coding-promoter-TSS (ENSRNOT00000065411)	-16	ENSRNOT00000065411	ENSRNOG00000021057	ENSRNOT00000065411			Osbp			protein_coding
NA_peak_1080	13	110078021	110078021	+	3695329	NA	promoter-TSS (ENSRNOT00000000078)	protein_coding-promoter-TSS (ENSRNOT00000000078)	-75	ENSRNOT00000000078	ENSRNOG00000000068	ENSRNOT00000000078			Ppp2r5a			protein_coding
NA_peak_2113	2	264786523	264786523	+	3695329	NA	intron (ENSRNOT00000015170, intron 1 of 14)	protein_coding-intron (ENSRNOT00000015170, intron 1 of 14)	281	ENSRNOT00000015170	ENSRNOG00000011340	ENSRNOT00000015170			Ankrd13c			protein_coding
NA_peak_2596	4	57336958	57336958	+	3695329	NA	Intergenic	Intergenic	-41111	ENSRNOT00000080173	ENSRNOG00000008752	ENSRNOT00000011851			Nrf1			protein_coding
NA_peak_1278	15	24942467	24942467	+	3695329	NA	exon (ENSRNOT00000016629, exon 1 of 6)	protein_coding-exon (ENSRNOT00000016629, exon 1 of 6)	249	ENSRNOT00000016629	ENSRNOG00000012363	ENSRNOT00000016629			Peli2			protein_coding
NA_peak_2401	3	117389412	117389412	+	3695329	NA	promoter-TSS (ENSRNOT00000007103)	protein_coding-promoter-TSS (ENSRNOT00000007103)	44	ENSRNOT00000007103	ENSRNOG00000005258	ENSRNOT00000081533			Myef2			protein_coding
NA_peak_3462	7	128587739	128587739	+	3680730	NA	intron (ENSRNOT00000074625, intron 1 of 3)	protein_coding-intron (ENSRNOT00000074625, intron 1 of 3)	87728	ENSRNOT00000074625	ENSRNOG00000049349	ENSRNOT00000074625			Tafa5			protein_coding
NA_peak_722	10	109757248	109757248	+	3627159	NA	intron (ENSRNOT00000054957, intron 1 of 5)	protein_coding-intron (ENSRNOT00000054957, intron 1 of 5)	302	ENSRNOT00000054957	ENSRNOG00000036688	ENSRNOT00000054957			Arhgdia			protein_coding
NA_peak_2920	5	142845547	142845547	+	3607214	NA	promoter-TSS (ENSRNOT00000065105)	protein_coding-promoter-TSS (ENSRNOT00000065105)	-431	ENSRNOT00000065105	ENSRNOG00000042421	ENSRNOT00000065105			RGD1559909			protein_coding
NA_peak_730	10	110468997	110468997	+	3607214	NA	promoter-TSS (ENSRNOT00000054919)	protein_coding-promoter-TSS (ENSRNOT00000054919)	-293	ENSRNOT00000054919	ENSRNOG00000036663	ENSRNOT00000054919			Foxk2			protein_coding
NA_peak_2718	4	157374330	157374330	+	3607214	NA	promoter-TSS (ENSRNOT00000071027)	protein_coding-promoter-TSS (ENSRNOT00000071027)	12	ENSRNOT00000071027	ENSRNOG00000047447	ENSRNOT00000071027			AC115420.2			protein_coding
NA_peak_482	10	29289461	29289461	+	3576595	NA	exon (ENSRNOT00000067013, exon 1 of 4)	protein_coding-exon (ENSRNOT00000067013, exon 1 of 4)	258	ENSRNOT00000067013	ENSRNOG00000003936	ENSRNOT00000067013			Pwwp2a			protein_coding
NA_peak_1592	17	79149319	79149319	+	3545362	NA	Intergenic	Intergenic	-33356	ENSRNOT00000085608	ENSRNOG00000061693	ENSRNOT00000085608			U6			snRNA
NA_peak_2568	4	25825487	25825487	+	3539972	NA	promoter-TSS (ENSRNOT00000009417)	protein_coding-promoter-TSS (ENSRNOT00000009417)	-80	ENSRNOT00000009417	ENSRNOG00000007151	ENSRNOT00000009417			Cdk14			protein_coding
NA_peak_3052	5	173296213	173296213	+	3503197	NA	promoter-TSS (ENSRNOT00000026439)	protein_coding-promoter-TSS (ENSRNOT00000026439)	-57	ENSRNOT00000026439	ENSRNOG00000019423	ENSRNOT00000026439			Dvl1			protein_coding
NA_peak_2787	5	48504183	48504183	+	3503197	NA	exon (ENSRNOT00000010271, exon 2 of 4)	protein_coding-exon (ENSRNOT00000010271, exon 2 of 4)	328	ENSRNOT00000010271	ENSRNOG00000007793	ENSRNOT00000010271			Pnrc1			protein_coding
NA_peak_3827	9	70134071	70134071	+	3455830	NA	exon (ENSRNOT00000040525, exon 1 of 26)	protein_coding-exon (ENSRNOT00000040525, exon 1 of 26)	102	ENSRNOT00000040525	ENSRNOG00000012424	ENSRNOT00000040525			Adam23			protein_coding
NA_peak_3757	9	16440051	16440051	+	3455830	NA	intron (ENSRNOT00000091809, intron 1 of 11)	protein_coding-intron (ENSRNOT00000021762, intron 4 of 11)	12462	ENSRNOT00000091809	ENSRNOG00000016229	ENSRNOT00000021762			Bicral			protein_coding
NA_peak_3399	7	104641755	104641755	+	3455830	NA	Intergenic	Intergenic	-85336	ENSRNOT00000090784	ENSRNOG00000061246	ENSRNOT00000078116			Fam49b			protein_coding
NA_peak_2869	5	126511970	126511970	+	3455830	NA	intron (ENSRNOT00000011408, intron 1 of 16)	protein_coding-intron (ENSRNOT00000011408, intron 1 of 16)	620	ENSRNOT00000011408	ENSRNOG00000007920	ENSRNOT00000011408			Ssbp3			protein_coding
NA_peak_1496	17	6786136	6786136	+	3455830	NA	promoter-TSS (ENSRNOT00000083408)	protein_coding-promoter-TSS (ENSRNOT00000083408)	-212	ENSRNOT00000083408	ENSRNOG00000019272	ENSRNOT00000083408			Gkap1			protein_coding
NA_peak_737	11	14741335	14741335	+	3433564	NA	intron (ENSRNOT00000002152, intron 1 of 3)	protein_coding-intron (ENSRNOT00000002152, intron 1 of 3)	228	ENSRNOT00000002152	ENSRNOG00000001585	ENSRNOT00000002152			Nrip1			protein_coding
NA_peak_2625	4	77746712	77746712	+	3433564	NA	intron (ENSRNOT00000009247, intron 1 of 6)	protein_coding-intron (ENSRNOT00000009247, intron 1 of 6)	358	ENSRNOT00000009247	ENSRNOG00000007064	ENSRNOT00000009247			Zfp746			protein_coding
NA_peak_215	1	174588324	174588324	+	3433564	NA	exon (ENSRNOT00000017485, exon 1 of 23)	protein_coding-exon (ENSRNOT00000017485, exon 1 of 23)	205	ENSRNOT00000017485	ENSRNOG00000012206	ENSRNOT00000017485			Dennd5a			protein_coding
NA_peak_808	11	73936692	73936692	+	3433564	NA	promoter-TSS (ENSRNOT00000002350)	protein_coding-promoter-TSS (ENSRNOT00000002350)	-58	ENSRNOT00000002350	ENSRNOG00000001724	ENSRNOT00000002350			Atp13a3			protein_coding
NA_peak_1141	14	37870720	37870720	+	3408782	NA	exon (ENSRNOT00000003087, exon 1 of 9)	protein_coding-exon (ENSRNOT00000003087, exon 1 of 9)	331	ENSRNOT00000003087	ENSRNOG00000002271	ENSRNOT00000003087			Slain2			protein_coding
NA_peak_2657	4	115157437	115157437	+	3408782	NA	promoter-TSS (ENSRNOT00000015296)	protein_coding-promoter-TSS (ENSRNOT00000015296)	-174	ENSRNOT00000015296	ENSRNOG00000011387	ENSRNOT00000015296			Tet3			protein_coding
NA_peak_1741	19	14352971	14352971	+	3408782	NA	intron (ENSRNOT00000067519, intron 1 of 10)	protein_coding-intron (ENSRNOT00000067519, intron 1 of 10)	560	ENSRNOT00000067519	ENSRNOG00000013878	ENSRNOT00000067519			Hmgxb4			protein_coding
NA_peak_3642	8	77992525	77992525	+	3408782	NA	promoter-TSS (ENSRNOT00000085843)	protein_coding-promoter-TSS (ENSRNOT00000085843)	96	ENSRNOT00000085843	ENSRNOG00000057676	ENSRNOT00000077999			Polr2m			protein_coding
NA_peak_201	1	164977329	164977329	+	3401072	NA	exon (ENSRNOT00000029629, exon 1 of 6)	protein_coding-exon (ENSRNOT00000029629, exon 1 of 6)	304	ENSRNOT00000029629	ENSRNOG00000026408	ENSRNOT00000029629			Rnf169			protein_coding
NA_peak_1830	19	54767027	54767027	+	3401072	NA	intron (ENSRNOT00000025894, intron 1 of 13)	protein_coding-intron (ENSRNOT00000025894, intron 1 of 13)	438	ENSRNOT00000025894	ENSRNOG00000019140	ENSRNOT00000025894			Banp			protein_coding
NA_peak_2204	20	42968770	42968770	+	3393243	NA	exon (ENSRNOT00000000707, exon 2 of 3)	protein_coding-exon (ENSRNOT00000000707, exon 2 of 3)	2630	ENSRNOT00000000707	ENSRNOG00000000579	ENSRNOT00000000707			Marcks			protein_coding
NA_peak_3549	8	32165628	32165628	+	3393243	NA	promoter-TSS (ENSRNOT00000007539)	protein_coding-promoter-TSS (ENSRNOT00000007539)	-182	ENSRNOT00000007539	ENSRNOG00000005578	ENSRNOT00000007539			Zbtb44			protein_coding
NA_peak_1837	19	55862165	55862165	+	3389939	NA	Intergenic	Intergenic	12931	ENSRNOT00000086482	ENSRNOG00000054676	ENSRNOT00000086482			U3			snoRNA
NA_peak_1211	14	85982763	85982763	+	3311981	NA	promoter-TSS (ENSRNOT00000076740)	protein_coding-promoter-TSS (ENSRNOT00000076740)	8	ENSRNOT00000076740	ENSRNOG00000012184	ENSRNOT00000016468			Urgcp			protein_coding
NA_peak_1541	17	22863998	22863998	+	3311981	NA	promoter-TSS (ENSRNOT00000046157)	protein_coding-promoter-TSS (ENSRNOT00000046157)	-32	ENSRNOT00000046157	ENSRNOG00000031495	ENSRNOT00000046157			Tmem170b			protein_coding
NA_peak_3730	8	130750114	130750114	+	3305848	NA	intron (ENSRNOT00000079273, intron 1 of 6)	protein_coding-intron (ENSRNOT00000079273, intron 1 of 6)	276	ENSRNOT00000079273	ENSRNOG00000004050	ENSRNOT00000005422			Snrk			protein_coding
NA_peak_3403	7	108613568	108613568	+	3305848	NA	promoter-TSS (ENSRNOT00000007564)	protein_coding-promoter-TSS (ENSRNOT00000007564)	-171	ENSRNOT00000007564	ENSRNOG00000046527	ENSRNOT00000007564			Phf20l1			protein_coding
NA_peak_791	11	69427673	69427673	+	3266404	NA	Intergenic	Intergenic	-56620	ENSRNOT00000049292	ENSRNOG00000001706	ENSRNOT00000049292			Kalrn			protein_coding
NA_peak_2014	2	187275383	187275383	+	3266404	NA	exon (ENSRNOT00000017234, exon 1 of 13)	protein_coding-exon (ENSRNOT00000017234, exon 1 of 13)	263	ENSRNOT00000017234	ENSRNOG00000042261	ENSRNOT00000017234			Hdgf			protein_coding
NA_peak_2562	4	10995612	10995612	+	3262224	NA	exon (ENSRNOT00000066643, exon 22 of 22)	protein_coding-exon (ENSRNOT00000066643, exon 22 of 22)	180	ENSRNOT00000078733	ENSRNOG00000052731	ENSRNOT00000078733			AABR07059243.1			protein_coding
NA_peak_3230	6	136041591	136041591	+	3262224	NA	promoter-TSS (ENSRNOT00000014395)	protein_coding-promoter-TSS (ENSRNOT00000014395)	-186	ENSRNOT00000014395	ENSRNOG00000010330	ENSRNOT00000092806			Mark3			protein_coding
NA_peak_2045	2	204031715	204031715	+	3262224	NA	intron (ENSRNOT00000040430, intron 1 of 23)	protein_coding-intron (ENSRNOT00000040430, intron 1 of 23)	308	ENSRNOT00000040430	ENSRNOG00000030019	ENSRNOT00000040430			Atp1a1			protein_coding
NA_peak_2314	3	46935018	46935018	+	3262224	NA	intron (ENSRNOT00000011682, intron 1 of 13)	protein_coding-intron (ENSRNOT00000011682, intron 1 of 13)	7948	ENSRNOT00000087439	ENSRNOG00000008482	ENSRNOT00000011682			Rbms1			protein_coding
NA_peak_2326	3	56126072	56126072	+	3262224	NA	exon (ENSRNOT00000011380, exon 1 of 39)	protein_coding-exon (ENSRNOT00000011380, exon 1 of 39)	148	ENSRNOT00000011380	ENSRNOG00000008616	ENSRNOT00000011380			Ubr3			protein_coding
NA_peak_2469	3	156635729	156635729	+	3262224	NA	Intergenic	Intergenic	6135	ENSRNOT00000090476	ENSRNOG00000051892	ENSRNOT00000090476			AABR07072945.1			lincRNA
NA_peak_1667	18	36829336	36829336	+	3262224	NA	intron (ENSRNOT00000086979, intron 1 of 21)	protein_coding-intron (ENSRNOT00000025467, intron 1 of 21)	246	ENSRNOT00000086979	ENSRNOG00000018849	ENSRNOT00000025467			Tcerg1			protein_coding
NA_peak_3415	7	117719574	117719574	+	3241323	NA	promoter-TSS (ENSRNOT00000077172)	protein_coding-promoter-TSS (ENSRNOT00000077172)	31	ENSRNOT00000077172	ENSRNOG00000014811	ENSRNOT00000093083			Cyhr1			protein_coding
NA_peak_125	1	100865748	100865748	+	3241323	NA	exon (ENSRNOT00000027580, exon 1 of 12)	protein_coding-exon (ENSRNOT00000027580, exon 1 of 12)	146	ENSRNOT00000027580	ENSRNOG00000020358	ENSRNOT00000027580			Ptov1			protein_coding
NA_peak_174	1	143646969	143646969	+	3241323	NA	exon (ENSRNOT00000026595, exon 1 of 8)	protein_coding-exon (ENSRNOT00000026595, exon 1 of 8)	155	ENSRNOT00000026595	ENSRNOG00000019529	ENSRNOT00000026595			Btbd1			protein_coding
NA_peak_68	1	65550683	65550683	+	3241323	NA	exon (ENSRNOT00000029996, exon 1 of 17)	protein_coding-exon (ENSRNOT00000029996, exon 1 of 17)	360	ENSRNOT00000029996	ENSRNOG00000027487	ENSRNOT00000029996			Trim28			protein_coding
NA_peak_3720	8	127271373	127271373	+	3241323	NA	promoter-TSS (ENSRNOT00000015113)	protein_coding-promoter-TSS (ENSRNOT00000015113)	84	ENSRNOT00000015113	ENSRNOG00000043167	ENSRNOT00000015113			Itga9			protein_coding
NA_peak_3229	6	136003193	136003193	+	3237866	NA	Intergenic	Intergenic	-1021	ENSRNOT00000013695	ENSRNOG00000010218	ENSRNOT00000013695			Eif5			protein_coding
NA_peak_3376	7	75597170	75597170	+	3232072	NA	promoter-TSS (ENSRNOT00000080676)	protein_coding-promoter-TSS (ENSRNOT00000080676)	-83	ENSRNOT00000080676	ENSRNOG00000008195	ENSRNOT00000035628			Ywhaz			protein_coding
NA_peak_1702	18	69723810	69723810	+	3220192	NA	promoter-TSS (ENSRNOT00000000125)	protein_coding-promoter-TSS (ENSRNOT00000000125)	59	ENSRNOT00000000125	ENSRNOG00000000113	ENSRNOT00000000125			Elac1			protein_coding
NA_peak_2731	4	165629904	165629904	+	3220192	NA	promoter-TSS (ENSRNOT00000068185)	protein_coding-promoter-TSS (ENSRNOT00000068185)	92	ENSRNOT00000068185	ENSRNOG00000005480	ENSRNOT00000007427			Ybx3			protein_coding
NA_peak_1127	14	21040195	21040195	+	3220192	NA	exon (ENSRNOT00000004551, exon 1 of 10)	protein_coding-exon (ENSRNOT00000004551, exon 1 of 10)	205	ENSRNOT00000004551	ENSRNOG00000003392	ENSRNOT00000086571			Grsf1			protein_coding
NA_peak_3143	6	91595697	91595697	+	3220192	NA	promoter-TSS (ENSRNOT00000006223)	protein_coding-promoter-TSS (ENSRNOT00000006223)	-126	ENSRNOT00000006223	ENSRNOG00000004474	ENSRNOT00000006223			Klhdc2			protein_coding
NA_peak_91	1	82108018	82108018	+	3220192	NA	promoter-TSS (ENSRNOT00000027677)	protein_coding-promoter-TSS (ENSRNOT00000027677)	65	ENSRNOT00000027677	ENSRNOG00000020417	ENSRNOT00000027677			Gsk3a			protein_coding
NA_peak_3295	7	14303015	14303015	+	3220192	NA	promoter-TSS (ENSRNOT00000008963)	protein_coding-promoter-TSS (ENSRNOT00000008963)	40	ENSRNOT00000008963	ENSRNOG00000006770	ENSRNOT00000008963			Brd4			protein_coding
NA_peak_931	12	39131310	39131310	+	3220192	NA	intron (ENSRNOT00000044071, intron 5 of 15)	protein_coding-intron (ENSRNOT00000044071, intron 5 of 15)	53191	ENSRNOT00000044071	ENSRNOG00000025702	ENSRNOT00000044071			Kdm2b			protein_coding
NA_peak_2089	2	240889852	240889852	+	3175943	NA	Intergenic	Intergenic	14322	ENSRNOT00000078950	ENSRNOG00000059004	ENSRNOT00000078950			U2			snRNA
NA_peak_752	11	31893766	31893766	+	3147686	NA	intron (ENSRNOT00000042750, intron 1 of 38)	protein_coding-intron (ENSRNOT00000042750, intron 1 of 38)	277	ENSRNOT00000042750	ENSRNOG00000002001	ENSRNOT00000042750			Itsn1			protein_coding
NA_peak_3231	6	136330638	136330638	+	3130801	NA	intron (ENSRNOT00000093106, intron 1 of 14)	protein_coding-intron (ENSRNOT00000015935, intron 1 of 13)	153	ENSRNOT00000015935	ENSRNOG00000011572	ENSRNOT00000092911			Klc1			protein_coding
NA_peak_3098	6	30208161	30208161	+	3124786	NA	Intergenic	Intergenic	-20824	ENSRNOT00000074150	ENSRNOG00000046741	ENSRNOT00000074150			Itsn2			protein_coding
NA_peak_2085	2	238529337	238529337	+	3124786	NA	intron (ENSRNOT00000016195, intron 1 of 11)	protein_coding-intron (ENSRNOT00000016195, intron 1 of 11)	263	ENSRNOT00000016195	ENSRNOG00000012091	ENSRNOT00000076152			Ppa2			protein_coding
NA_peak_2561	4	10823602	10823602	+	3124786	NA	promoter-TSS (ENSRNOT00000018040)	protein_coding-promoter-TSS (ENSRNOT00000018040)	321	ENSRNOT00000066739	ENSRNOG00000013517	ENSRNOT00000066739			Phtf2			protein_coding
NA_peak_221	1	178351850	178351850	+	3124786	NA	promoter-TSS (ENSRNOT00000076756)	protein_coding-promoter-TSS (ENSRNOT00000076756)	87	ENSRNOT00000076756	ENSRNOG00000013176	ENSRNOT00000076430			Far1			protein_coding
NA_peak_2104	2	251862688	251862688	+	3124786	NA	promoter-TSS (ENSRNOT00000036282)	protein_coding-promoter-TSS (ENSRNOT00000036282)	-381	ENSRNOT00000036282	ENSRNOG00000026186	ENSRNOT00000036282			Syde2			protein_coding
NA_peak_285	1	217721244	217721244	+	3093131	NA	promoter-TSS (ENSRNOT00000078810)	protein_coding-promoter-TSS (ENSRNOT00000078810)	132	ENSRNOT00000092748	ENSRNOG00000020857	ENSRNOT00000092944			Ppfia1			protein_coding
NA_peak_2233	3	3574642	3574642	+	3093131	NA	promoter-TSS (ENSRNOT00000078087)	lincRNA-promoter-TSS (ENSRNOT00000078087)	145	ENSRNOT00000087651	ENSRNOG00000018231	ENSRNOT00000024786			Nacc2			protein_coding
NA_peak_7	1	4011503	4011503	+	3093131	NA	promoter-TSS (ENSRNOT00000040559)	protein_coding-promoter-TSS (ENSRNOT00000040559)	8	ENSRNOT00000040559	ENSRNOG00000013351	ENSRNOT00000040559			Stxbp5			protein_coding
NA_peak_2304	3	37947257	37947257	+	3084565	NA	promoter-TSS (ENSRNOT00000009181)	protein_coding-promoter-TSS (ENSRNOT00000009181)	26	ENSRNOT00000009181	ENSRNOG00000006839	ENSRNOT00000076134			Arl5a			protein_coding
NA_peak_2071	2	224824074	224824074	+	3084565	NA	Intergenic	Intergenic	-21077	ENSRNOT00000032324	ENSRNOG00000025160	ENSRNOT00000032324			Tlcd4			protein_coding
NA_peak_346	1	239266755	239266755	+	3084565	NA	promoter-TSS (ENSRNOT00000037500)	protein_coding-promoter-TSS (ENSRNOT00000037500)	-166	ENSRNOT00000044486	ENSRNOG00000012514	ENSRNOT00000044486			Abhd17b			protein_coding
NA_peak_296	1	219853372	219853372	+	3083054	NA	promoter-TSS (ENSRNOT00000026169)	protein_coding-promoter-TSS (ENSRNOT00000026169)	-43	ENSRNOT00000026169	ENSRNOG00000019356	ENSRNOT00000026169			Lrfn4			protein_coding
NA_peak_2939	5	147583457	147583457	+	3054472	NA	intron (ENSRNOT00000010983, intron 1 of 4)	protein_coding-intron (ENSRNOT00000010983, intron 1 of 4)	581	ENSRNOT00000010983	ENSRNOG00000008300	ENSRNOT00000010983			Zbtb8a			protein_coding
NA_peak_2473	3	157099009	157099009	+	3051151	NA	intron (ENSRNOT00000022861, intron 1 of 36)	protein_coding-intron (ENSRNOT00000022861, intron 1 of 36)	297	ENSRNOT00000022861	ENSRNOG00000016744	ENSRNOT00000089958			Chd6			protein_coding
NA_peak_723	10	109774464	109774464	+	3048741	NA	promoter-TSS (ENSRNOT00000054954)	protein_coding-promoter-TSS (ENSRNOT00000054954)	175	ENSRNOT00000054955	ENSRNOG00000036687	ENSRNOT00000054955			Alyref			protein_coding
NA_peak_1993	2	150728944	150728944	+	3048741	NA	Intergenic	Intergenic	-27241	ENSRNOT00000088461	ENSRNOG00000014076	ENSRNOT00000088461			Mbnl1			protein_coding
NA_peak_271	1	206900785	206900785	+	3048741	NA	intron (ENSRNOT00000054897, intron 1 of 51)	protein_coding-intron (ENSRNOT00000054897, intron 1 of 51)	168	ENSRNOT00000054897	ENSRNOG00000018683	ENSRNOT00000054897			Dock1			protein_coding
NA_peak_3867	9	99299386	99299386	+	2994724	NA	intron (ENSRNOT00000027622, intron 1 of 26)	protein_coding-intron (ENSRNOT00000027622, intron 1 of 26)	329	ENSRNOT00000027622	ENSRNOG00000020372	ENSRNOT00000027622			Hdac4			protein_coding
NA_peak_3785	9	43515217	43515217	+	2993828	NA	Intergenic	Intergenic	11481	ENSRNOT00000089959	ENSRNOG00000055425	ENSRNOT00000089959			AABR07067405.1			lincRNA
NA_peak_534	10	48772632	48772632	+	2993828	NA	intron (ENSRNOT00000081409, intron 1 of 44)	protein_coding-intron (ENSRNOT00000081409, intron 1 of 44)	258	ENSRNOT00000081409	ENSRNOG00000055246	ENSRNOT00000081409			Ncor1			protein_coding
NA_peak_543	10	55969501	55969501	+	2983043	NA	Intergenic	Intergenic	-4285	ENSRNOT00000057058	ENSRNOG00000009722	ENSRNOT00000057058			Chd3			protein_coding
NA_peak_9	1	5448966	5448966	+	2952150	NA	promoter-TSS (ENSRNOT00000061930)	protein_coding-promoter-TSS (ENSRNOT00000061930)	8	ENSRNOT00000061930	ENSRNOG00000040242	ENSRNOT00000061930			Epm2a			protein_coding
NA_peak_1575	17	57366728	57366728	+	2945006	NA	TTS (ENSRNOT00000063623)	miRNA-TTS (ENSRNOT00000063623)	287	ENSRNOT00000063623	ENSRNOG00000041870	ENSRNOT00000063623						miRNA
NA_peak_3069	6	10533199	10533199	+	2945006	NA	promoter-TSS (ENSRNOT00000020822)	protein_coding-promoter-TSS (ENSRNOT00000020822)	48	ENSRNOT00000020822	ENSRNOG00000015415	ENSRNOT00000020822			Rhoq			protein_coding
NA_peak_2047	2	205783517	205783517	+	2945006	NA	exon (ENSRNOT00000025600, exon 1 of 19)	protein_coding-exon (ENSRNOT00000025600, exon 1 of 19)	265	ENSRNOT00000025633	ENSRNOG00000018946	ENSRNOT00000025600			Trim33			protein_coding
NA_peak_1174	14	78902185	78902185	+	2940445	NA	promoter-TSS (ENSRNOT00000088469)	protein_coding-promoter-TSS (ENSRNOT00000088469)	-122	ENSRNOT00000088469	ENSRNOG00000058202	ENSRNOT00000091927			Ppp2r2c			protein_coding
NA_peak_2324	3	56058165	56058165	+	2940445	NA	intron (ENSRNOT00000088351, intron 1 of 3)	protein_coding-intron (ENSRNOT00000010508, intron 1 of 4)	1122	ENSRNOT00000010508	ENSRNOG00000007981	ENSRNOT00000010508			Klhl23			protein_coding
NA_peak_2881	5	129370792	129370792	+	2928316	NA	Intergenic	Intergenic	-9974	ENSRNOT00000072754	ENSRNOG00000050523	ENSRNOT00000072754			AABR07049579.2			protein_coding
NA_peak_3847	9	86128633	86128633	+	2928316	NA	intron (ENSRNOT00000093730, intron 1 of 15)	protein_coding-intron (ENSRNOT00000093554, intron 1 of 3)	440	ENSRNOT00000093730	ENSRNOG00000015633	ENSRNOT00000021528			Cul3			protein_coding
NA_peak_1751	19	21218334	21218334	+	2928316	NA	promoter-TSS (ENSRNOT00000049285)	protein_coding-promoter-TSS (ENSRNOT00000049285)	-131	ENSRNOT00000049285	ENSRNOG00000015121	ENSRNOT00000049285			N4bp1			protein_coding
NA_peak_3438	7	121394645	121394645	+	2928316	NA	Intergenic	Intergenic	-14184	ENSRNOT00000023434	ENSRNOG00000017434	ENSRNOT00000023434			Mgat3			protein_coding
NA_peak_2197	20	34894887	34894887	+	2928316	NA	promoter-TSS (ENSRNOT00000084420)	protein_coding-promoter-TSS (ENSRNOT00000084420)	-172	ENSRNOT00000084420	ENSRNOG00000000415	ENSRNOT00000084420			Asf1a			protein_coding
NA_peak_2465	3	153548323	153548323	+	2928316	NA	Intergenic	Intergenic	15235	ENSRNOT00000071183	ENSRNOG00000050664	ENSRNOT00000071183			AC095852.1			miRNA
NA_peak_2788	5	50002341	50002341	+	2928316	NA	exon (ENSRNOT00000010962, exon 1 of 5)	protein_coding-exon (ENSRNOT00000010962, exon 1 of 5)	157	ENSRNOT00000010962	ENSRNOG00000008288	ENSRNOT00000010962			Akirin2			protein_coding
NA_peak_1231	14	106130313	106130313	+	2928316	NA	Intergenic	Intergenic	10194	ENSRNOT00000081100	ENSRNOG00000060673	ENSRNOT00000081100			AC135757.1			snoRNA
NA_peak_1005	13	52589149	52589149	+	2928316	NA	exon (ENSRNOT00000011999, exon 1 of 2)	protein_coding-exon (ENSRNOT00000011999, exon 1 of 2)	232	ENSRNOT00000011999	ENSRNOG00000009068	ENSRNOT00000011999			Phlda3			protein_coding
NA_peak_925	12	37771571	37771571	+	2928316	NA	Intergenic	Intergenic	-8392	ENSRNOT00000087776	ENSRNOG00000055376	ENSRNOT00000087776			7SK			misc_RNA
NA_peak_1579	17	63236324	63236324	+	2921402	NA	Intergenic	Intergenic	-15411	ENSRNOT00000085521	ENSRNOG00000061309	ENSRNOT00000085521			7SK			misc_RNA
NA_peak_935	12	39553951	39553951	+	2907456	NA	promoter-TSS (ENSRNOT00000001738)	protein_coding-promoter-TSS (ENSRNOT00000001738)	48	ENSRNOT00000001738	ENSRNOG00000001285	ENSRNOT00000001738			Atp2a2			protein_coding
NA_peak_2222	3	2123621	2123621	+	2902291	NA	intron (ENSRNOT00000086843, intron 1 of 26)	protein_coding-intron (ENSRNOT00000086843, intron 1 of 26)	199	ENSRNOT00000086843	ENSRNOG00000007242	ENSRNOT00000086843			Ehmt1			protein_coding
NA_peak_1164	14	64686900	64686900	+	2902291	NA	promoter-TSS (ENSRNOT00000036646)	protein_coding-promoter-TSS (ENSRNOT00000036646)	-10	ENSRNOT00000036646	ENSRNOG00000004279	ENSRNOT00000005894			Adgra3			protein_coding
NA_peak_3715	8	123370388	123370388	+	2902291	NA	exon (ENSRNOT00000017243, exon 1 of 16)	protein_coding-exon (ENSRNOT00000017243, exon 1 of 16)	869	ENSRNOT00000017243	ENSRNOG00000011922	ENSRNOT00000077792			Stt3b			protein_coding
NA_peak_2677	4	123978544	123978544	+	2902291	NA	Intergenic	Intergenic	-26736	ENSRNOT00000014353	ENSRNOG00000010536	ENSRNOT00000014353			Nr2c2			protein_coding
NA_peak_912	12	30565985	30565985	+	2902291	NA	promoter-TSS (ENSRNOT00000035621)	protein_coding-promoter-TSS (ENSRNOT00000035621)	30	ENSRNOT00000035621	ENSRNOG00000023919	ENSRNOT00000035621			Nipsnap2			protein_coding
NA_peak_1607	17	86408484	86408484	+	2902291	NA	exon (ENSRNOT00000022734, exon 1 of 1)	protein_coding-exon (ENSRNOT00000022734, exon 1 of 1)	333	ENSRNOT00000022734	ENSRNOG00000016950	ENSRNOT00000022734			Otud1			protein_coding
NA_peak_2669	4	119890085	119890085	+	2902291	NA	promoter-TSS (ENSRNOT00000033687)	protein_coding-promoter-TSS (ENSRNOT00000033687)	-136	ENSRNOT00000033687	ENSRNOG00000027722	ENSRNOT00000033687			H1f10			protein_coding
NA_peak_175	1	143751836	143751836	+	2902291	NA	promoter-TSS (ENSRNOT00000026754)	protein_coding-promoter-TSS (ENSRNOT00000026754)	-47	ENSRNOT00000026754	ENSRNOG00000019740	ENSRNOT00000076414			Hdgfl3			protein_coding
NA_peak_240	1	193076691	193076691	+	2879238	NA	intron (ENSRNOT00000017885, intron 1 of 23)	protein_coding-intron (ENSRNOT00000017885, intron 1 of 23)	232	ENSRNOT00000017885	ENSRNOG00000024737	ENSRNOT00000086492			Tnrc6a			protein_coding
NA_peak_896	12	23151377	23151377	+	2879238	NA	intron (ENSRNOT00000059486, intron 1 of 22)	protein_coding-intron (ENSRNOT00000059486, intron 1 of 22)	197	ENSRNOT00000059486	ENSRNOG00000001424	ENSRNOT00000059486			Cux1			protein_coding
NA_peak_661	10	92492437	92492437	+	2879238	NA	Intergenic	Intergenic	-16238	ENSRNOT00000087426	ENSRNOG00000059304	ENSRNOT00000087426			AABR07030529.1			miRNA
NA_peak_3181	6	107461150	107461150	+	2841485	NA	promoter-TSS (ENSRNOT00000058127)	protein_coding-promoter-TSS (ENSRNOT00000058127)	-109	ENSRNOT00000058127	ENSRNOG00000038183	ENSRNOT00000058127			Heatr4			protein_coding
NA_peak_2492	3	163748741	163748741	+	2815776	NA	intron (ENSRNOT00000010633, intron 1 of 11)	protein_coding-intron (ENSRNOT00000010633, intron 1 of 11)	255	ENSRNOT00000010633	ENSRNOG00000007781	ENSRNOT00000010633			Stau1			protein_coding
NA_peak_2263	3	9037338	9037338	+	2805273	NA	exon (ENSRNOT00000036770, exon 1 of 1)	protein_coding-exon (ENSRNOT00000036770, exon 1 of 1)	604	ENSRNOT00000036770	ENSRNOG00000024846	ENSRNOT00000036770			Ier5l			protein_coding
NA_peak_1530	17	16409644	16409644	+	2801976	NA	Intergenic	Intergenic	-8211	ENSRNOT00000053755	ENSRNOG00000035632	ENSRNOT00000053755			Mirlet7a1			miRNA
NA_peak_921	12	37480011	37480011	+	2801976	NA	intron (ENSRNOT00000001397, intron 1 of 3)	protein_coding-intron (ENSRNOT00000001397, intron 1 of 3)	286	ENSRNOT00000001397	ENSRNOG00000001053	ENSRNOT00000001397			Tmed2			protein_coding
NA_peak_1768	19	25801400	25801400	+	2801976	NA	intron (ENSRNOT00000003884, intron 1 of 5)	protein_coding-intron (ENSRNOT00000003884, intron 1 of 5)	126	ENSRNOT00000003884	ENSRNOG00000002864	ENSRNOT00000003884			Nacc1			protein_coding
NA_peak_1770	19	25914491	25914491	+	2801976	NA	intron (ENSRNOT00000091994, intron 1 of 10)	protein_coding-intron (ENSRNOT00000039354, intron 1 of 9)	198	ENSRNOT00000091994	ENSRNOG00000002983	ENSRNOT00000091994			Nfix			protein_coding
NA_peak_1216	14	86739221	86739221	+	2779761	NA	exon (ENSRNOT00000078282, exon 1 of 1)	protein_coding-exon (ENSRNOT00000078282, exon 1 of 1)	114	ENSRNOT00000078282	ENSRNOG00000056150	ENSRNOT00000078282			Purb			protein_coding
NA_peak_383	1	260517515	260517515	+	2760780	NA	promoter-TSS (ENSRNOT00000018043)	protein_coding-promoter-TSS (ENSRNOT00000018043)	-192	ENSRNOT00000018043	ENSRNOG00000013443	ENSRNOT00000018043			Tm9sf3			protein_coding
NA_peak_111	1	89382193	89382193	+	2760780	NA	intron (ENSRNOT00000087381, intron 1 of 9)	protein_coding-intron (ENSRNOT00000087381, intron 1 of 9)	270	ENSRNOT00000087381	ENSRNOG00000053725	ENSRNOT00000087381			Usf2			protein_coding
NA_peak_2636	4	87111050	87111050	+	2760780	NA	promoter-TSS (ENSRNOT00000018442)	protein_coding-promoter-TSS (ENSRNOT00000018442)	-25	ENSRNOT00000018442	ENSRNOG00000013809	ENSRNOT00000018442			Kbtbd2			protein_coding
NA_peak_1267	15	19690378	19690378	+	2760780	NA	exon (ENSRNOT00000010612, exon 1 of 11)	protein_coding-exon (ENSRNOT00000010612, exon 1 of 11)	184	ENSRNOT00000010612	ENSRNOG00000007956	ENSRNOT00000010612			Styx			protein_coding
NA_peak_3512	7	142869998	142869998	+	2760780	NA	exon (ENSRNOT00000009979, exon 1 of 8)	protein_coding-exon (ENSRNOT00000009979, exon 1 of 8)	246	ENSRNOT00000009979	ENSRNOG00000007346	ENSRNOT00000088730			Grasp			protein_coding
NA_peak_3458	7	126939882	126939882	+	2760780	NA	promoter-TSS (ENSRNOT00000022746)	protein_coding-promoter-TSS (ENSRNOT00000022746)	-43	ENSRNOT00000022746	ENSRNOG00000016968	ENSRNOT00000022746			Gramd4			protein_coding
NA_peak_3097	6	29012210	29012210	+	2760780	NA	promoter-TSS (ENSRNOT00000079077)	protein_coding-promoter-TSS (ENSRNOT00000079077)	3	ENSRNOT00000079077	ENSRNOG00000058973	ENSRNOT00000085612			Atad2b			protein_coding
NA_peak_2415	3	123434673	123434673	+	2760780	NA	exon (ENSRNOT00000028847, exon 1 of 29)	protein_coding-exon (ENSRNOT00000028847, exon 1 of 29)	264	ENSRNOT00000028847	ENSRNOG00000021240	ENSRNOT00000028847			Atrn			protein_coding
NA_peak_3875	9	102863082	102863082	+	2759616	NA	exon (ENSRNOT00000050494, exon 1 of 3)	protein_coding-exon (ENSRNOT00000050494, exon 1 of 3)	138	ENSRNOT00000080129	ENSRNOG00000019087	ENSRNOT00000050494			Fam174a			protein_coding
NA_peak_1048	13	94886995	94886995	+	2759616	NA	Intergenic	Intergenic	-1083	ENSRNOT00000077995	ENSRNOG00000004181	ENSRNOT00000077995			Sdccag8			protein_coding
NA_peak_1957	2	120267076	120267076	+	2759616	NA	exon (ENSRNOT00000015192, exon 1 of 12)	protein_coding-exon (ENSRNOT00000015192, exon 1 of 12)	143	ENSRNOT00000015192	ENSRNOG00000011261	ENSRNOT00000015192			Ttc14			protein_coding
NA_peak_3410	7	117128648	117128648	+	2759616	NA	TTS (ENSRNOT00000013353)	protein_coding-TTS (ENSRNOT00000013353)	150	ENSRNOT00000045280	ENSRNOG00000032574	ENSRNOT00000045280			Scrib			protein_coding
NA_peak_2385	3	103980771	103980771	+	2759616	NA	intron (ENSRNOT00000008387, intron 1 of 1)	protein_coding-intron (ENSRNOT00000008387, intron 1 of 1)	-5829	ENSRNOT00000087193	ENSRNOG00000052201	ENSRNOT00000087193						snoRNA
NA_peak_1538	17	18421727	18421727	+	2759616	NA	exon (ENSRNOT00000036560, exon 1 of 6)	protein_coding-exon (ENSRNOT00000036560, exon 1 of 6)	134	ENSRNOT00000036560	ENSRNOG00000026120	ENSRNOT00000060500			Fam8a1			protein_coding
NA_peak_2635	4	85009515	85009515	+	2759616	NA	exon (ENSRNOT00000072271, exon 1 of 7)	protein_coding-exon (ENSRNOT00000072271, exon 1 of 7)	165	ENSRNOT00000072271	ENSRNOG00000049057	ENSRNOT00000072271			Znrf2			protein_coding
NA_peak_3782	9	43093525	43093525	+	2742195	NA	exon (ENSRNOT00000021592, exon 1 of 8)	protein_coding-exon (ENSRNOT00000021592, exon 1 of 8)	387	ENSRNOT00000021592	ENSRNOG00000016032	ENSRNOT00000021592			Cnnm3			protein_coding
NA_peak_3351	7	64251566	64251566	+	2736792	NA	promoter-TSS (ENSRNOT00000006180)	protein_coding-promoter-TSS (ENSRNOT00000006180)	-456	ENSRNOT00000006180	ENSRNOG00000004603	ENSRNOT00000006180			Srgap1			protein_coding
NA_peak_1548	17	29809172	29809172	+	2730358	NA	intron (ENSRNOT00000048757, intron 3 of 9)	protein_coding-intron (ENSRNOT00000048757, intron 3 of 9)	58892	ENSRNOT00000074537	ENSRNOG00000045578	ENSRNOT00000074537			AABR07072546.1			pseudogene
NA_peak_2792	5	57472388	57472388	+	2730358	NA	promoter-TSS (ENSRNOT00000015575)	protein_coding-promoter-TSS (ENSRNOT00000015575)	73	ENSRNOT00000015575	ENSRNOG00000010727	ENSRNOT00000015575			Ube2r2			protein_coding
NA_peak_1585	17	75352598	75352598	+	2730358	NA	intron (ENSRNOT00000023436, intron 1 of 12)	protein_coding-intron (ENSRNOT00000023436, intron 1 of 12)	209	ENSRNOT00000023436	ENSRNOG00000023661	ENSRNOT00000023436			Celf2			protein_coding
NA_peak_2185	20	29198991	29198991	+	2720296	NA	intron (ENSRNOT00000071477, intron 1 of 7)	protein_coding-intron (ENSRNOT00000071477, intron 1 of 7)	233	ENSRNOT00000071477	ENSRNOG00000045920	ENSRNOT00000090771			Mcu			protein_coding
NA_peak_2313	3	46286478	46286478	+	2720296	NA	promoter-TSS (ENSRNOT00000085563)	protein_coding-promoter-TSS (ENSRNOT00000085563)	-234	ENSRNOT00000085563	ENSRNOG00000006241	ENSRNOT00000085563			Marchf7			protein_coding
NA_peak_2205	20	43107988	43107988	+	2710644	NA	exon (ENSRNOT00000000742, exon 1 of 14)	protein_coding-exon (ENSRNOT00000000742, exon 1 of 14)	210	ENSRNOT00000000742	ENSRNOG00000000604	ENSRNOT00000000742			Hdac2			protein_coding
NA_peak_3290	7	12821060	12821060	+	2710644	NA	intron (ENSRNOT00000012317, intron 1 of 8)	protein_coding-intron (ENSRNOT00000012317, intron 1 of 8)	220	ENSRNOT00000012317	ENSRNOG00000009028	ENSRNOT00000012317			Rnf126			protein_coding
NA_peak_2284	3	14394881	14394881	+	2689673	NA	intron (ENSRNOT00000092787, intron 1 of 3)	protein_coding-intron (ENSRNOT00000092787, intron 1 of 3)	481	ENSRNOT00000092787	ENSRNOG00000018901	ENSRNOT00000025649			Rab14			protein_coding
NA_peak_3049	5	173139641	173139641	+	2689673	NA	promoter-TSS (ENSRNOT00000065877)	pseudogene-promoter-TSS (ENSRNOT00000065877)	13	ENSRNOT00000065877	ENSRNOG00000042062	ENSRNOT00000065877			AC105662.2			pseudogene
NA_peak_3641	8	77108140	77108140	+	2689673	NA	intron (ENSRNOT00000083255, intron 1 of 15)	protein_coding-intron (ENSRNOT00000083255, intron 1 of 15)	604	ENSRNOT00000083255	ENSRNOG00000054257	ENSRNOT00000083255			Adam10			protein_coding
NA_peak_802	11	72378660	72378660	+	2659985	NA	promoter-TSS (ENSRNOT00000078737)	protein_coding-promoter-TSS (ENSRNOT00000078737)	58	ENSRNOT00000078737	ENSRNOG00000038597	ENSRNOT00000058885			Dlg1			protein_coding
NA_peak_2895	5	136717366	136717366	+	2659985	NA	TTS (ENSRNOT00000026704)	protein_coding-TTS (ENSRNOT00000026704)	-1385	ENSRNOT00000026591	ENSRNOG00000019609	ENSRNOT00000026591			B4galt2			protein_coding
NA_peak_513	10	43446079	43446079	+	2659985	NA	promoter-TSS (ENSRNOT00000036959)	protein_coding-promoter-TSS (ENSRNOT00000036959)	-447	ENSRNOT00000036959	ENSRNOG00000031544	ENSRNOT00000036959			Larp1			protein_coding
NA_peak_3882	9	113330917	113330917	+	2659985	NA	intron (ENSRNOT00000020681, intron 1 of 5)	protein_coding-intron (ENSRNOT00000020681, intron 1 of 5)	402	ENSRNOT00000020681	ENSRNOG00000014765	ENSRNOT00000020681			Vapa			protein_coding
NA_peak_1689	18	61259837	61259837	+	2659985	NA	promoter-TSS (ENSRNOT00000070429)	miRNA-promoter-TSS (ENSRNOT00000070429)	-437	ENSRNOT00000070429	ENSRNOG00000045162	ENSRNOT00000070429			AABR07032329.1			miRNA
NA_peak_1983	2	141451223	141451223	+	2638607	NA	promoter-TSS (ENSRNOT00000018244)	protein_coding-promoter-TSS (ENSRNOT00000018244)	-11	ENSRNOT00000018244	ENSRNOG00000013397	ENSRNOT00000018244			Foxo1			protein_coding
NA_peak_2256	3	8632889	8632889	+	2619878	NA	intron (ENSRNOT00000050528, intron 5 of 26)	protein_coding-intron (ENSRNOT00000050528, intron 5 of 26)	4856	ENSRNOT00000050528	ENSRNOG00000025892	ENSRNOT00000050528			Set			protein_coding
NA_peak_2889	5	135735880	135735880	+	2611126	NA	promoter-TSS (ENSRNOT00000068267)	protein_coding-promoter-TSS (ENSRNOT00000068267)	55	ENSRNOT00000068267	ENSRNOG00000018160	ENSRNOT00000068267			Zswim5			protein_coding
NA_peak_454	10	13515251	13515251	+	2599218	NA	intron (ENSRNOT00000067660, intron 1 of 13)	protein_coding-intron (ENSRNOT00000067660, intron 1 of 13)	197	ENSRNOT00000067660	ENSRNOG00000006136	ENSRNOT00000067660			Pdpk1			protein_coding
NA_peak_2986	5	156344242	156344242	+	2599218	NA	Intergenic	Intergenic	-52453	ENSRNOT00000067631	ENSRNOG00000014368	ENSRNOT00000090232			Eif4g3			protein_coding
NA_peak_3639	8	76939971	76939971	+	2599218	NA	exon (ENSRNOT00000082709, exon 1 of 15)	protein_coding-exon (ENSRNOT00000082709, exon 1 of 15)	123	ENSRNOT00000082709	ENSRNOG00000060750	ENSRNOT00000084313			Rnf111			protein_coding
NA_peak_3381	7	77763628	77763628	+	2599218	NA	exon (ENSRNOT00000006411, exon 1 of 3)	protein_coding-exon (ENSRNOT00000006411, exon 1 of 3)	116	ENSRNOT00000006411	ENSRNOG00000004697	ENSRNOT00000006411			Baalc			protein_coding
NA_peak_3198	6	122721607	122721607	+	2599218	NA	promoter-TSS (ENSRNOT00000079697)	protein_coding-promoter-TSS (ENSRNOT00000079697)	-111	ENSRNOT00000079697	ENSRNOG00000060568	ENSRNOT00000079697			Ptpn21			protein_coding
NA_peak_3271	7	11824433	11824433	+	2598721	NA	exon (ENSRNOT00000051467, exon 1 of 29)	protein_coding-exon (ENSRNOT00000051467, exon 1 of 29)	309	ENSRNOT00000051467	ENSRNOG00000032546	ENSRNOT00000051467			Dot1l			protein_coding
NA_peak_1237	14	108376525	108376525	+	2598721	NA	Intergenic	Intergenic	-4368	ENSRNOT00000085886	ENSRNOG00000054669	ENSRNOT00000088116			RGD1305110			protein_coding
NA_peak_330	1	226353439	226353439	+	2598721	NA	intron (ENSRNOT00000037624, intron 1 of 19)	protein_coding-intron (ENSRNOT00000037624, intron 1 of 19)	172	ENSRNOT00000037624	ENSRNOG00000027264	ENSRNOT00000037624			Dagla			protein_coding
NA_peak_3138	6	86651158	86651158	+	2598721	NA	promoter-TSS (ENSRNOT00000034756)	protein_coding-promoter-TSS (ENSRNOT00000034756)	-38	ENSRNOT00000034756	ENSRNOG00000023230	ENSRNOT00000034756			RGD1307621			protein_coding
NA_peak_170	1	143036207	143036207	+	2598721	NA	promoter-TSS (ENSRNOT00000025797)	protein_coding-promoter-TSS (ENSRNOT00000025797)	-11	ENSRNOT00000025797	ENSRNOG00000019005	ENSRNOT00000025797			Pde8a			protein_coding
NA_peak_1020	13	72743758	72743758	+	2598721	NA	exon (ENSRNOT00000093366, exon 1 of 1)	protein_coding-exon (ENSRNOT00000093366, exon 1 of 1)	537	ENSRNOT00000093366	ENSRNOG00000059406	ENSRNOT00000077157			Ier5			protein_coding
NA_peak_1092	14	2898423	2898423	+	2598721	NA	intron (ENSRNOT00000061630, intron 1 of 17)	protein_coding-intron (ENSRNOT00000061630, intron 1 of 17)	5670	ENSRNOT00000061630	ENSRNOG00000002039	ENSRNOT00000061630			Evi5			protein_coding
NA_peak_3171	6	104437405	104437405	+	2598721	NA	intron (ENSRNOT00000076485, intron 1 of 5)	protein_coding-intron (ENSRNOT00000076321, intron 1 of 3)	158	ENSRNOT00000076700	ENSRNOG00000045941	ENSRNOT00000076485			Susd6			protein_coding
NA_peak_205	1	165966841	165966841	+	2598721	NA	exon (ENSRNOT00000089359, exon 1 of 22)	protein_coding-exon (ENSRNOT00000089359, exon 1 of 22)	228	ENSRNOT00000089359	ENSRNOG00000053502	ENSRNOT00000089359			Arhgef17			protein_coding
NA_peak_3024	5	167953010	167953010	+	2598721	NA	intron (ENSRNOT00000085315, intron 1 of 3)	protein_coding-intron (ENSRNOT00000085315, intron 1 of 3)	282	ENSRNOT00000085315	ENSRNOG00000058186	ENSRNOT00000085315			Errfi1			protein_coding
NA_peak_3147	6	92398607	92398607	+	2598721	NA	promoter-TSS (ENSRNOT00000007314)	protein_coding-promoter-TSS (ENSRNOT00000007314)	-82	ENSRNOT00000007314	ENSRNOG00000005264	ENSRNOT00000007314			Sav1			protein_coding
NA_peak_2450	3	150664280	150664280	+	2598721	NA	Intergenic	Intergenic	-22358	ENSRNOT00000078235	ENSRNOG00000059043	ENSRNOT00000078235			Itch			protein_coding
NA_peak_2312	3	46196510	46196510	+	2598721	NA	intron (ENSRNOT00000051344, intron 3 of 10)	protein_coding-intron (ENSRNOT00000051344, intron 3 of 10)	11150	ENSRNOT00000051344	ENSRNOG00000031951	ENSRNOT00000051344			LOC100361645			protein_coding
NA_peak_1010	13	56015930	56015930	+	2578470	NA	promoter-TSS (ENSRNOT00000043907)	protein_coding-promoter-TSS (ENSRNOT00000043907)	29	ENSRNOT00000043907	ENSRNOG00000011063	ENSRNOT00000035129			Dennd1b			protein_coding
NA_peak_483	10	30834002	30834002	+	2578470	NA	promoter-TSS (ENSRNOT00000035346)	protein_coding-promoter-TSS (ENSRNOT00000035346)	59	ENSRNOT00000079437	ENSRNOG00000005406	ENSRNOT00000079437			Clint1			protein_coding
NA_peak_2584	4	45001186	45001186	+	2578470	NA	exon (ENSRNOT00000080880, exon 1 of 15)	protein_coding-exon (ENSRNOT00000080880, exon 1 of 15)	131	ENSRNOT00000080880	ENSRNOG00000056243	ENSRNOT00000080880			ST7			protein_coding
NA_peak_1479	16	85329849	85329849	+	2578470	NA	exon (ENSRNOT00000019563, exon 1 of 2)	protein_coding-exon (ENSRNOT00000019563, exon 1 of 2)	243	ENSRNOT00000019563	ENSRNOG00000014598	ENSRNOT00000019563			Abhd13			protein_coding
NA_peak_969	12	47590321	47590321	+	2578470	NA	intron (ENSRNOT00000045946, intron 1 of 19)	protein_coding-intron (ENSRNOT00000045946, intron 1 of 19)	167	ENSRNOT00000045946	ENSRNOG00000001190	ENSRNOT00000045946			Git2			protein_coding
NA_peak_2510	3	172195279	172195279	+	2578470	NA	promoter-TSS (ENSRNOT00000034915)	protein_coding-promoter-TSS (ENSRNOT00000034915)	-565	ENSRNOT00000034915	ENSRNOG00000028384	ENSRNOT00000034915			Npepl1			protein_coding
NA_peak_3296	7	14384889	14384889	+	2578470	NA	intron (ENSRNOT00000008303, intron 3 of 8)	protein_coding-intron (ENSRNOT00000008303, intron 3 of 8)	-15068	ENSRNOT00000008560	ENSRNOG00000006355	ENSRNOT00000090673			Akap8l			protein_coding
NA_peak_267	1	204938489	204938489	+	2578470	NA	Intergenic	Intergenic	-20685	ENSRNOT00000023257	ENSRNOG00000017294	ENSRNOT00000023257			Zranb1			protein_coding
NA_peak_2559	4	10631567	10631567	+	2542568	NA	intron (ENSRNOT00000081939, intron 1 of 14)	protein_coding-intron (ENSRNOT00000017907, intron 1 of 17)	438	ENSRNOT00000017907	ENSRNOG00000013135	ENSRNOT00000081939			Ptpn12			protein_coding
NA_peak_189	1	156295925	156295925	+	2542568	NA	exon (ENSRNOT00000025653, exon 1 of 2)	protein_coding-exon (ENSRNOT00000025653, exon 1 of 2)	236	ENSRNOT00000025653	ENSRNOG00000018987	ENSRNOT00000025653			Crebzf			protein_coding
NA_peak_3556	8	39623629	39623629	+	2540995	NA	Intergenic	Intergenic	-63640	ENSRNOT00000012060	ENSRNOG00000008757	ENSRNOT00000012060			Tmem218			protein_coding
NA_peak_3561	8	47529438	47529438	+	2540995	NA	exon (ENSRNOT00000012826, exon 1 of 4)	protein_coding-exon (ENSRNOT00000012826, exon 1 of 4)	251	ENSRNOT00000012826	ENSRNOG00000009243	ENSRNOT00000012826			Oaf			protein_coding
NA_peak_1258	15	10319930	10319930	+	2540995	NA	promoter-TSS (ENSRNOT00000075125)	processed_transcript-promoter-TSS (ENSRNOT00000075125)	-189	ENSRNOT00000075125	ENSRNOG00000048795	ENSRNOT00000076520			Top2b			processed_transcript
NA_peak_724	10	109811087	109811087	+	2540995	NA	intron (ENSRNOT00000054970, intron 1 of 2)	protein_coding-intron (ENSRNOT00000054970, intron 1 of 2)	236	ENSRNOT00000054970	ENSRNOG00000036697	ENSRNOT00000054970			Mafg			protein_coding
NA_peak_1493	17	6666251	6666251	+	2540995	NA	intron (ENSRNOT00000025980, intron 1 of 15)	protein_coding-intron (ENSRNOT00000025980, intron 1 of 15)	592	ENSRNOT00000025980	ENSRNOG00000019113	ENSRNOT00000025980			Hnrnpk			protein_coding
NA_peak_2021	2	189106282	189106282	+	2540995	NA	exon (ENSRNOT00000028210, exon 1 of 13)	protein_coding-exon (ENSRNOT00000028210, exon 1 of 13)	243	ENSRNOT00000028210	ENSRNOG00000020791	ENSRNOT00000028210			Ube2q1			protein_coding
NA_peak_502	10	38692382	38692382	+	2540995	NA	exon (ENSRNOT00000009440, exon 1 of 21)	protein_coding-exon (ENSRNOT00000009440, exon 1 of 21)	171	ENSRNOT00000009440	ENSRNOG00000006965	ENSRNOT00000009440			Aff4			protein_coding
NA_peak_3044	5	172552817	172552817	+	2539546	NA	Intergenic	Intergenic	-63995	ENSRNOT00000019620	ENSRNOG00000014270	ENSRNOT00000019620			Rer1			protein_coding
NA_peak_3274	7	11963003	11963003	+	2519756	NA	intron (ENSRNOT00000080342, intron 1 of 11)	protein_coding-intron (ENSRNOT00000025266, intron 1 of 12)	265	ENSRNOT00000080342	ENSRNOG00000018529	ENSRNOT00000080342			Csnk1g2			protein_coding
NA_peak_3226	6	135271116	135271116	+	2519756	NA	exon (ENSRNOT00000051685, exon 1 of 8)	protein_coding-exon (ENSRNOT00000051685, exon 1 of 8)	245	ENSRNOT00000079048	ENSRNOG00000031661	ENSRNOT00000079048			Zfp839			protein_coding
NA_peak_2714	4	153217813	153217813	+	2501516	NA	promoter-TSS (ENSRNOT00000015499)	protein_coding-promoter-TSS (ENSRNOT00000015499)	31	ENSRNOT00000015499	ENSRNOG00000011566	ENSRNOT00000015499			Cecr2			protein_coding
NA_peak_2086	2	238803289	238803289	+	2501281	NA	promoter-TSS (ENSRNOT00000046775)	protein_coding-promoter-TSS (ENSRNOT00000046775)	-265	ENSRNOT00000046775	ENSRNOG00000023579	ENSRNOT00000046775			Tet2			protein_coding
NA_peak_438	10	6869439	6869439	+	2501281	NA	exon (ENSRNOT00000003439, exon 2 of 5)	protein_coding-exon (ENSRNOT00000003439, exon 2 of 5)	572	ENSRNOT00000003439	ENSRNOG00000002545	ENSRNOT00000003439			RGD1309748			protein_coding
NA_peak_2951	5	150389870	150389870	+	2501281	NA	intron (ENSRNOT00000014479, intron 1 of 4)	protein_coding-intron (ENSRNOT00000014479, intron 1 of 4)	229	ENSRNOT00000014479	ENSRNOG00000010892	ENSRNOT00000014479			Ythdf2			protein_coding
NA_peak_2964	5	151977542	151977542	+	2501281	NA	promoter-TSS (ENSRNOT00000009173)	protein_coding-promoter-TSS (ENSRNOT00000009173)	94	ENSRNOT00000009173	ENSRNOG00000006137	ENSRNOT00000009173			Arid1a			protein_coding
NA_peak_3683	8	111849770	111849770	+	2491958	NA	exon (ENSRNOT00000044956, exon 1 of 5)	protein_coding-exon (ENSRNOT00000044956, exon 1 of 5)	305	ENSRNOT00000082097	ENSRNOG00000010186	ENSRNOT00000044956			Cdv3			protein_coding
NA_peak_2101	2	250743827	250743827	+	2480822	NA	exon (ENSRNOT00000017770, exon 1 of 9)	protein_coding-exon (ENSRNOT00000017770, exon 1 of 9)	133	ENSRNOT00000084337	ENSRNOG00000012957	ENSRNOT00000084337			Sh3glb1			protein_coding
NA_peak_1566	17	49833579	49833579	+	2480822	NA	exon (ENSRNOT00000018431, exon 1 of 21)	protein_coding-exon (ENSRNOT00000018431, exon 1 of 21)	179	ENSRNOT00000018431	ENSRNOG00000013620	ENSRNOT00000018431			Cdk13			protein_coding
NA_peak_560	10	59173509	59173509	+	2480822	NA	exon (ENSRNOT00000013486, exon 1 of 6)	protein_coding-exon (ENSRNOT00000013486, exon 1 of 6)	241	ENSRNOT00000013486	ENSRNOG00000010041	ENSRNOT00000013486			Ube2g1			protein_coding
NA_peak_3723	8	128577370	128577370	+	2468669	NA	promoter-TSS (ENSRNOT00000082356)	protein_coding-promoter-TSS (ENSRNOT00000082356)	25	ENSRNOT00000082356	ENSRNOG00000016942	ENSRNOT00000082356			Wdr48			protein_coding
NA_peak_2388	3	110710582	110710582	+	2462620	NA	Intergenic	Intergenic	-12899	ENSRNOT00000013878	ENSRNOG00000010428	ENSRNOT00000013878			Bahd1			protein_coding
NA_peak_2454	3	151223815	151223815	+	2443097	NA	intron (ENSRNOT00000026091, intron 1 of 18)	protein_coding-intron (ENSRNOT00000026091, intron 1 of 18)	308	ENSRNOT00000026091	ENSRNOG00000019152	ENSRNOT00000026091			Trpc4ap			protein_coding
NA_peak_2206	20	44436850	44436850	+	2443097	NA	intron (ENSRNOT00000076859, intron 1 of 12)	protein_coding-intron (ENSRNOT00000000733, intron 1 of 13)	442	ENSRNOT00000076859	ENSRNOG00000000596	ENSRNOT00000076859			Fyn			protein_coding
NA_peak_1257	15	8731017	8731017	+	2443097	NA	exon (ENSRNOT00000081845, exon 1 of 8)	protein_coding-exon (ENSRNOT00000081845, exon 1 of 8)	146	ENSRNOT00000081845	ENSRNOG00000046912	ENSRNOT00000071751			Nr1d2			protein_coding
NA_peak_1027	13	74154770	74154770	+	2443097	NA	promoter-TSS (ENSRNOT00000059524)	protein_coding-promoter-TSS (ENSRNOT00000059524)	-65	ENSRNOT00000059524	ENSRNOG00000004305	ENSRNOT00000059524			Abl2			protein_coding
NA_peak_1443	16	60208944	60208944	+	2443097	NA	promoter-TSS (ENSRNOT00000015203)	protein_coding-promoter-TSS (ENSRNOT00000015203)	-482	ENSRNOT00000015203	ENSRNOG00000011431	ENSRNOT00000015203			Mfhas1			protein_coding
NA_peak_280	1	215010769	215010769	+	2436950	NA	Intergenic	Intergenic	-5628	ENSRNOT00000088263	ENSRNOG00000061253	ENSRNOT00000088263			AABR07006038.1			lincRNA
NA_peak_2364	3	81095678	81095678	+	2436950	NA	Intergenic	Intergenic	-10814	ENSRNOT00000068922	ENSRNOG00000043655	ENSRNOT00000068922			AABR07052890.1			miRNA
NA_peak_3630	8	72284532	72284532	+	2436950	NA	promoter-TSS (ENSRNOT00000081548)	lincRNA-promoter-TSS (ENSRNOT00000081548)	320	ENSRNOT00000080319	ENSRNOG00000017714	ENSRNOT00000080319			Usp3			protein_coding
NA_peak_3247	7	2479540	2479540	+	2436950	NA	exon (ENSRNOT00000003787, exon 1 of 8)	protein_coding-exon (ENSRNOT00000003787, exon 1 of 8)	229	ENSRNOT00000003787	ENSRNOG00000002642	ENSRNOT00000003787			Ptges3			protein_coding
NA_peak_2667	4	119756387	119756387	+	2436950	NA	intron (ENSRNOT00000013884, intron 1 of 4)	protein_coding-intron (ENSRNOT00000013884, intron 1 of 4)	378	ENSRNOT00000013884	ENSRNOG00000010239	ENSRNOT00000013884			Cnbp			protein_coding
NA_peak_613	10	82032743	82032743	+	2436950	NA	promoter-TSS (ENSRNOT00000067751)	protein_coding-promoter-TSS (ENSRNOT00000067751)	87	ENSRNOT00000067751	ENSRNOG00000002935	ENSRNOT00000067751			Ankrd40			protein_coding
NA_peak_3228	6	135830202	135830202	+	2436950	NA	promoter-TSS (ENSRNOT00000039059)	protein_coding-promoter-TSS (ENSRNOT00000039059)	-116	ENSRNOT00000039059	ENSRNOG00000009675	ENSRNOT00000080623			Cdc42bpb			protein_coding
NA_peak_1230	14	106008128	106008128	+	2436950	NA	promoter-TSS (ENSRNOT00000009319)	protein_coding-promoter-TSS (ENSRNOT00000009319)	42	ENSRNOT00000009319	ENSRNOG00000006329	ENSRNOT00000009319			Peli1			protein_coding
NA_peak_3459	7	127057726	127057726	+	2436950	NA	exon (ENSRNOT00000022882, exon 1 of 13)	protein_coding-exon (ENSRNOT00000022882, exon 1 of 13)	330	ENSRNOT00000022882	ENSRNOG00000017022	ENSRNOT00000022882			Cerk			protein_coding
NA_peak_73	1	72903372	72903372	+	2435338	NA	exon (ENSRNOT00000086122, exon 1 of 22)	protein_coding-exon (ENSRNOT00000086122, exon 1 of 22)	115	ENSRNOT00000086122	ENSRNOG00000053828	ENSRNOT00000086122			Ppp1r12c			protein_coding
NA_peak_2740	4	177403050	177403050	+	2397256	NA	exon (ENSRNOT00000020042, exon 1 of 9)	protein_coding-exon (ENSRNOT00000020042, exon 1 of 9)	146	ENSRNOT00000020042	ENSRNOG00000014856	ENSRNOT00000020042			Etnk1			protein_coding
NA_peak_462	10	14547391	14547391	+	2397256	NA	intron (ENSRNOT00000092043, intron 1 of 14)	protein_coding-intron (ENSRNOT00000092043, intron 1 of 14)	219	ENSRNOT00000092043	ENSRNOG00000054605	ENSRNOT00000092043			Unkl			protein_coding
NA_peak_3890	9	114709535	114709535	+	2397256	NA	promoter-TSS (ENSRNOT00000026177)	protein_coding-promoter-TSS (ENSRNOT00000026177)	11	ENSRNOT00000026177	ENSRNOG00000019295	ENSRNOT00000026177			Rab12			protein_coding
NA_peak_2891	5	136147011	136147011	+	2397256	NA	intron (ENSRNOT00000026201, intron 3 of 12)	protein_coding-intron (ENSRNOT00000026201, intron 3 of 12)	19775	ENSRNOT00000026201	ENSRNOG00000019236	ENSRNOT00000026201			Rnf220			protein_coding
NA_peak_2863	5	120186818	120186818	+	2397256	NA	Intergenic	Intergenic	-10471	ENSRNOT00000080806	ENSRNOG00000054001	ENSRNOT00000080806			AABR07049386.1			miRNA
NA_peak_3078	6	22281974	22281974	+	2397256	NA	promoter-TSS (ENSRNOT00000039375)	protein_coding-promoter-TSS (ENSRNOT00000039375)	-88	ENSRNOT00000039375	ENSRNOG00000027136	ENSRNOT00000079137			Spast			protein_coding
NA_peak_3654	8	82561036	82561036	+	2397256	NA	promoter-TSS (ENSRNOT00000083410)	protein_coding-promoter-TSS (ENSRNOT00000083410)	65	ENSRNOT00000083410	ENSRNOG00000010642	ENSRNOT00000014301			Lysmd2			protein_coding
NA_peak_2350	3	67804347	67804347	+	2393690	NA	Intergenic	Intergenic	-16357	ENSRNOT00000064851	ENSRNOG00000007518	ENSRNOT00000064851			Nckap1			protein_coding
NA_peak_3781	9	42943043	42943043	+	2388263	NA	intron (ENSRNOT00000085260, intron 1 of 21)	protein_coding-intron (ENSRNOT00000020955, intron 1 of 19)	109	ENSRNOT00000020955	ENSRNOG00000015417	ENSRNOT00000085260			Kansl3			protein_coding
NA_peak_2387	3	110540549	110540549	+	2388263	NA	promoter-TSS (ENSRNOT00000081203)	pseudogene-promoter-TSS (ENSRNOT00000081203)	-168	ENSRNOT00000081203	ENSRNOG00000055241	ENSRNOT00000081203			AABR07053500.1			pseudogene
NA_peak_278	1	214181592	214181592	+	2378161	NA	promoter-TSS (ENSRNOT00000022363)	protein_coding-promoter-TSS (ENSRNOT00000022363)	94	ENSRNOT00000079464	ENSRNOG00000016611	ENSRNOT00000079464			Hras			protein_coding
NA_peak_1885	2	29028928	29028928	+	2378161	NA	intron (ENSRNOT00000020692, intron 1 of 25)	protein_coding-intron (ENSRNOT00000020692, intron 1 of 25)	248	ENSRNOT00000020692	ENSRNOG00000015334	ENSRNOT00000020692			Fcho2			protein_coding
NA_peak_3285	7	12422309	12422309	+	2378161	NA	intron (ENSRNOT00000060698, intron 2 of 8)	protein_coding-intron (ENSRNOT00000060698, intron 2 of 8)	2058	ENSRNOT00000060698	ENSRNOG00000015434	ENSRNOT00000060698			Midn			protein_coding
NA_peak_652	10	90393253	90393253	+	2378161	NA	promoter-TSS (ENSRNOT00000028563)	protein_coding-promoter-TSS (ENSRNOT00000028563)	64	ENSRNOT00000028563	ENSRNOG00000021041	ENSRNOT00000028563			Fam171a2			protein_coding
NA_peak_664	10	93415888	93415888	+	2378161	NA	exon (ENSRNOT00000066484, exon 1 of 22)	protein_coding-exon (ENSRNOT00000066484, exon 1 of 22)	489	ENSRNOT00000066484	ENSRNOG00000006285	ENSRNOT00000066484			Tlk2			protein_coding
NA_peak_3815	9	65279980	65279980	+	2378161	NA	intron (ENSRNOT00000019486, intron 1 of 10)	protein_coding-intron (ENSRNOT00000019486, intron 1 of 10)	305	ENSRNOT00000019486	ENSRNOG00000013977	ENSRNOT00000019486			Bzw1			protein_coding
NA_peak_2617	4	77212705	77212705	+	2378161	NA	intron (ENSRNOT00000085805, intron 1 of 21)	protein_coding-intron (ENSRNOT00000007620, intron 1 of 21)	502	ENSRNOT00000085805	ENSRNOG00000005310	ENSRNOT00000085805			Cul1			protein_coding
NA_peak_2148	20	7753877	7753877	+	2378161	NA	Intergenic	Intergenic	-8450	ENSRNOT00000000595	ENSRNOG00000000501	ENSRNOT00000084771			Zfp523			protein_coding
NA_peak_1498	17	6909700	6909700	+	2378161	NA	promoter-TSS (ENSRNOT00000061231)	protein_coding-promoter-TSS (ENSRNOT00000061231)	-28	ENSRNOT00000061231	ENSRNOG00000039876	ENSRNOT00000061231			LOC681410			protein_coding
NA_peak_3819	9	66716807	66716807	+	2378161	NA	promoter-TSS (ENSRNOT00000031261)	protein_coding-promoter-TSS (ENSRNOT00000031261)	-162	ENSRNOT00000031261	ENSRNOG00000022066	ENSRNOT00000031261			Fam117b			protein_coding
NA_peak_2357	3	79390992	79390992	+	2378161	NA	promoter-TSS (ENSRNOT00000077943)	protein_coding-promoter-TSS (ENSRNOT00000077943)	-36	ENSRNOT00000077943	ENSRNOG00000034025	ENSRNOT00000077943			Ptprj			protein_coding
NA_peak_815	11	79827632	79827632	+	2363090	NA	Intergenic	Intergenic	12338	ENSRNOT00000079566	ENSRNOG00000051729	ENSRNOT00000079566			U7			snRNA
NA_peak_1402	16	19778135	19778135	+	2363090	NA	promoter-TSS (ENSRNOT00000022898)	protein_coding-promoter-TSS (ENSRNOT00000022898)	-721	ENSRNOT00000022898	ENSRNOG00000016892	ENSRNOT00000022898			Nr2f6			protein_coding
NA_peak_399	1	265469331	265469331	+	2363090	NA	Intergenic	Intergenic	29500	ENSRNOT00000023558	ENSRNOG00000017524	ENSRNOT00000023558			Fgf8			protein_coding
NA_peak_3698	8	117486079	117486079	+	2363090	NA	promoter-TSS (ENSRNOT00000027552)	protein_coding-promoter-TSS (ENSRNOT00000027552)	-4	ENSRNOT00000027552	ENSRNOG00000020284	ENSRNOT00000027552			Prkar2a			protein_coding
NA_peak_3507	7	141702309	141702309	+	2363090	NA	intron (ENSRNOT00000086577, intron 1 of 37)	protein_coding-intron (ENSRNOT00000086577, intron 1 of 37)	271	ENSRNOT00000086577	ENSRNOG00000056106	ENSRNOT00000086577			Dip2b			protein_coding
NA_peak_1031	13	78723196	78723196	+	2363090	NA	intron (ENSRNOT00000076401, intron 1 of 10)	processed_transcript-intron (ENSRNOT00000003689, intron 1 of 19)	347	ENSRNOT00000076401	ENSRNOG00000002750	ENSRNOT00000003689			Rc3h1			processed_transcript
NA_peak_3409	7	117070922	117070922	+	2363090	NA	promoter-TSS (ENSRNOT00000048446)	protein_coding-promoter-TSS (ENSRNOT00000048446)	14	ENSRNOT00000048446	ENSRNOG00000030264	ENSRNOT00000082433			Fam83h			protein_coding
NA_peak_1641	18	27012075	27012075	+	2363090	NA	Intergenic	Intergenic	16138	ENSRNOT00000090460	ENSRNOG00000056190	ENSRNOT00000090460			AABR07031689.1			lincRNA
NA_peak_2281	3	12944319	12944319	+	2358579	NA	intron (ENSRNOT00000023172, intron 1 of 9)	protein_coding-intron (ENSRNOT00000023172, intron 1 of 9)	175	ENSRNOT00000023172	ENSRNOG00000017172	ENSRNOT00000023172			Mvb12b			protein_coding
NA_peak_2673	4	121262402	121262402	+	2345803	NA	Intergenic	Intergenic	-4517	ENSRNOT00000022951	ENSRNOG00000017003	ENSRNOT00000022951			Plxna1			protein_coding
NA_peak_1507	17	9721461	9721461	+	2343322	NA	promoter-TSS (ENSRNOT00000047958)	protein_coding-promoter-TSS (ENSRNOT00000047958)	81	ENSRNOT00000047958	ENSRNOG00000014615	ENSRNOT00000047958			Grk6			protein_coding
NA_peak_1934	2	93623567	93623567	+	2342729	NA	intron (ENSRNOT00000013720, intron 1 of 4)	protein_coding-intron (ENSRNOT00000013720, intron 1 of 4)	17930	ENSRNOT00000013720	ENSRNOG00000010238	ENSRNOT00000013720			Chmp4c			protein_coding
NA_peak_902	12	24651466	24651466	+	2288018	NA	exon (ENSRNOT00000071569, exon 1 of 4)	protein_coding-exon (ENSRNOT00000071569, exon 1 of 4)	124	ENSRNOT00000071569	ENSRNOG00000048699	ENSRNOT00000071569			Vps37d			protein_coding
NA_peak_2549	4	7253105	7253105	+	2288018	NA	promoter-TSS (ENSRNOT00000084777)	protein_coding-promoter-TSS (ENSRNOT00000084777)	-33	ENSRNOT00000087120	ENSRNOG00000012764	ENSRNOT00000087120			Agap3			protein_coding
NA_peak_2363	3	80873764	80873764	+	2288018	NA	exon (ENSRNOT00000024280, exon 1 of 31)	protein_coding-exon (ENSRNOT00000024280, exon 1 of 31)	123	ENSRNOT00000024280	ENSRNOG00000017737	ENSRNOT00000024280			Dgkz			protein_coding
NA_peak_1426	16	35935487	35935487	+	2276538	NA	intron (ENSRNOT00000084707, intron 1 of 11)	protein_coding-intron (ENSRNOT00000016474, intron 1 of 11)	428	ENSRNOT00000016474	ENSRNOG00000012037	ENSRNOT00000084707			Galnt7			protein_coding
NA_peak_3340	7	59971251	59971251	+	2276538	NA	Intergenic	Intergenic	-14019	ENSRNOT00000007258	ENSRNOG00000005362	ENSRNOT00000081599			Rab3ip			protein_coding
NA_peak_1932	2	84608530	84608530	+	2276538	NA	exon (ENSRNOT00000028561, exon 1 of 26)	protein_coding-exon (ENSRNOT00000028561, exon 1 of 26)	182	ENSRNOT00000028561	ENSRNOG00000011066	ENSRNOT00000028561			Marchf6			protein_coding
NA_peak_1166	14	71852975	71852975	+	2276538	NA	intron (ENSRNOT00000078326, intron 1 of 10)	protein_coding-intron (ENSRNOT00000064636, intron 1 of 9)	245	ENSRNOT00000064636	ENSRNOG00000005261	ENSRNOT00000078326			Fbxl5			protein_coding
NA_peak_1366	15	106376667	106376667	+	2276538	NA	Intergenic	Intergenic	-57510	ENSRNOT00000015271	ENSRNOG00000011203	ENSRNOT00000015271			Farp1			protein_coding
NA_peak_1337	15	57891832	57891832	+	2276538	NA	intron (ENSRNOT00000001383, intron 1 of 5)	protein_coding-intron (ENSRNOT00000001383, intron 1 of 5)	152	ENSRNOT00000001383	ENSRNOG00000001049	ENSRNOT00000001383			Tpt1			protein_coding
NA_peak_157	1	131455407	131455407	+	2276538	NA	promoter-TSS (ENSRNOT00000014152)	protein_coding-promoter-TSS (ENSRNOT00000014152)	-718	ENSRNOT00000014152	ENSRNOG00000010308	ENSRNOT00000084336			Nr2f2			protein_coding
NA_peak_743	11	30427773	30427773	+	2276538	NA	exon (ENSRNOT00000047741, exon 1 of 20)	protein_coding-exon (ENSRNOT00000047741, exon 1 of 20)	300	ENSRNOT00000047741	ENSRNOG00000002104	ENSRNOT00000002881			Scaf4			protein_coding
NA_peak_870	12	13299900	13299900	+	2276538	NA	promoter-TSS (ENSRNOT00000039191)	protein_coding-promoter-TSS (ENSRNOT00000039191)	41	ENSRNOT00000039191	ENSRNOG00000024567	ENSRNOT00000039191			LOC683674			protein_coding
NA_peak_968	12	47588337	47588337	+	2276538	NA	promoter-TSS (ENSRNOT00000001595)	protein_coding-promoter-TSS (ENSRNOT00000001595)	-2	ENSRNOT00000001595	ENSRNOG00000001204	ENSRNOT00000001595			Ankrd13a			protein_coding
NA_peak_1461	16	74022763	74022763	+	2276538	NA	intron (ENSRNOT00000078743, intron 1 of 16)	protein_coding-intron (ENSRNOT00000078743, intron 1 of 16)	242	ENSRNOT00000078743	ENSRNOG00000025174	ENSRNOT00000037389			Kat6a			protein_coding
NA_peak_450	10	13036976	13036976	+	2276538	NA	Intergenic	Intergenic	14178	ENSRNOT00000033457	ENSRNOG00000028231	ENSRNOT00000033457			AABR07029202.1			protein_coding
NA_peak_1281	15	26033748	26033748	+	2276538	NA	promoter-TSS (ENSRNOT00000020074)	protein_coding-promoter-TSS (ENSRNOT00000020074)	-43	ENSRNOT00000020074	ENSRNOG00000014192	ENSRNOT00000020074			Naa30			protein_coding
NA_peak_3884	9	113514839	113514839	+	2276538	NA	Intergenic	Intergenic	-10234	ENSRNOT00000067974	ENSRNOG00000042189	ENSRNOT00000067974			Rab31			protein_coding
NA_peak_2333	3	59688598	59688598	+	2276538	NA	promoter-TSS (ENSRNOT00000078752)	protein_coding-promoter-TSS (ENSRNOT00000078752)	94	ENSRNOT00000078752	ENSRNOG00000060479	ENSRNOT00000078752			Sp3			protein_coding
NA_peak_520	10	46018537	46018537	+	2276538	NA	promoter-TSS (ENSRNOT00000004357)	protein_coding-promoter-TSS (ENSRNOT00000004357)	-122	ENSRNOT00000040865	ENSRNOG00000003226	ENSRNOT00000080666			Mprip			protein_coding
NA_peak_3073	6	11737485	11737485	+	2276538	NA	Intergenic	Intergenic	-50803	ENSRNOT00000021998	ENSRNOG00000016396	ENSRNOT00000021998			Fbxo11			protein_coding
NA_peak_1422	16	27399748	27399748	+	2276538	NA	exon (ENSRNOT00000065642, exon 1 of 22)	protein_coding-exon (ENSRNOT00000065642, exon 1 of 22)	281	ENSRNOT00000065642	ENSRNOG00000033528	ENSRNOT00000065642			Tll1			protein_coding
NA_peak_3010	5	164751632	164751632	+	2255636	NA	exon (ENSRNOT00000010558, exon 1 of 3)	protein_coding-exon (ENSRNOT00000010558, exon 1 of 3)	192	ENSRNOT00000010558	ENSRNOG00000007968	ENSRNOT00000010558			RGD1305350			protein_coding
NA_peak_929	12	38690779	38690779	+	2239662	NA	intron (ENSRNOT00000084192, intron 1 of 5)	protein_coding-intron (ENSRNOT00000084192, intron 1 of 5)	296	ENSRNOT00000084192	ENSRNOG00000056017	ENSRNOT00000084192			Bcl7a			protein_coding
NA_peak_3803	9	53627027	53627027	+	2239662	NA	promoter-TSS (ENSRNOT00000083487)	protein_coding-promoter-TSS (ENSRNOT00000083487)	-181	ENSRNOT00000083487	ENSRNOG00000012663	ENSRNOT00000083487			Mfsd6			protein_coding
NA_peak_2802	5	61077252	61077252	+	2239662	NA	exon (ENSRNOT00000015338, exon 1 of 6)	protein_coding-exon (ENSRNOT00000015338, exon 1 of 6)	375	ENSRNOT00000015338	ENSRNOG00000011503	ENSRNOT00000015338			Shb			protein_coding
NA_peak_1907	2	52302117	52302117	+	2239202	NA	promoter-TSS (ENSRNOT00000081157)	protein_coding-promoter-TSS (ENSRNOT00000081157)	-53	ENSRNOT00000081157	ENSRNOG00000058580	ENSRNOT00000091387			Paip1			protein_coding
NA_peak_44	1	44019173	44019173	+	2239202	NA	promoter-TSS (ENSRNOT00000083425)	protein_coding-promoter-TSS (ENSRNOT00000083425)	-34	ENSRNOT00000083425	ENSRNOG00000016919	ENSRNOT00000083425			Scaf8			protein_coding
NA_peak_1029	13	76943574	76943574	+	2239202	NA	promoter-TSS (ENSRNOT00000076908)	protein_coding-promoter-TSS (ENSRNOT00000076908)	-59	ENSRNOT00000076908	ENSRNOG00000042492	ENSRNOT00000076581			Cop1			protein_coding
NA_peak_532	10	48129072	48129072	+	2239202	NA	exon (ENSRNOT00000003792, exon 1 of 28)	protein_coding-exon (ENSRNOT00000003792, exon 1 of 28)	305	ENSRNOT00000003792	ENSRNOG00000002763	ENSRNOT00000003792			Ulk2			protein_coding
NA_peak_3877	9	110937005	110937005	+	2239202	NA	promoter-TSS (ENSRNOT00000064431)	protein_coding-promoter-TSS (ENSRNOT00000064431)	-374	ENSRNOT00000064431	ENSRNOG00000013875	ENSRNOT00000064431			Fbxl17			protein_coding
NA_peak_2517	3	175548339	175548339	+	2239202	NA	intron (ENSRNOT00000091941, intron 1 of 9)	protein_coding-intron (ENSRNOT00000091941, intron 1 of 9)	165	ENSRNOT00000091941	ENSRNOG00000055984	ENSRNOT00000091941			Adrm1			protein_coding
NA_peak_1349	15	87847304	87847304	+	2239202	NA	promoter-TSS (ENSRNOT00000072005)	miRNA-promoter-TSS (ENSRNOT00000072005)	91	ENSRNOT00000072005	ENSRNOG00000050367	ENSRNOT00000072005						miRNA
NA_peak_1155	14	59323820	59323820	+	2220471	NA	exon (ENSRNOT00000004006, exon 1 of 12)	protein_coding-exon (ENSRNOT00000004006, exon 1 of 12)	127	ENSRNOT00000004006	ENSRNOG00000002956	ENSRNOT00000004006			Stim2			protein_coding
NA_peak_3487	7	139318088	139318088	+	2220471	NA	intron (ENSRNOT00000092029, intron 1 of 24)	protein_coding-intron (ENSRNOT00000092029, intron 1 of 24)	367	ENSRNOT00000092029	ENSRNOG00000055597	ENSRNOT00000092029			Hdac7			protein_coding
NA_peak_1429	16	47369477	47369477	+	2220471	NA	exon (ENSRNOT00000017966, exon 1 of 23)	protein_coding-exon (ENSRNOT00000017966, exon 1 of 23)	709	ENSRNOT00000017966	ENSRNOG00000013248	ENSRNOT00000017966			Wwc2			protein_coding
NA_peak_50	1	47004385	47004385	+	2220471	NA	Intergenic	Intergenic	25927	ENSRNOT00000024211	ENSRNOG00000018007	ENSRNOT00000024211			Gtf2h5			protein_coding
NA_peak_1863	2	5580242	5580242	+	2220471	NA	promoter-TSS (ENSRNOT00000020044)	protein_coding-promoter-TSS (ENSRNOT00000020044)	-348	ENSRNOT00000020044	ENSRNOG00000014795	ENSRNOT00000093420			Nr2f1			protein_coding
NA_peak_510	10	40813027	40813027	+	2220471	NA	intron (ENSRNOT00000018149, intron 1 of 11)	protein_coding-intron (ENSRNOT00000018149, intron 1 of 11)	169	ENSRNOT00000018149	ENSRNOG00000013186	ENSRNOT00000018149			G3bp1			protein_coding
NA_peak_1790	19	39126905	39126905	+	2220471	NA	exon (ENSRNOT00000027561, exon 1 of 7)	protein_coding-exon (ENSRNOT00000027561, exon 1 of 7)	316	ENSRNOT00000027561	ENSRNOG00000020344	ENSRNOT00000027561			Sntb2			protein_coding
NA_peak_2868	5	125896736	125896736	+	2220471	NA	promoter-TSS (ENSRNOT00000029228)	protein_coding-promoter-TSS (ENSRNOT00000029228)	11	ENSRNOT00000029228	ENSRNOG00000005802	ENSRNOT00000029228			Usp24			protein_coding
NA_peak_3067	6	8220502	8220502	+	2220471	NA	exon (ENSRNOT00000040509, exon 2 of 8)	protein_coding-exon (ENSRNOT00000040509, exon 2 of 8)	274	ENSRNOT00000079279	ENSRNOG00000030667	ENSRNOT00000083470			Ppm1b			protein_coding
NA_peak_2505	3	167004603	167004603	+	2220471	NA	Intergenic	Intergenic	-10317	ENSRNOT00000081593	ENSRNOG00000021787	ENSRNOT00000034669			Zfp217			protein_coding
NA_peak_345	1	238843202	238843202	+	2220471	NA	promoter-TSS (ENSRNOT00000024583)	protein_coding-promoter-TSS (ENSRNOT00000024583)	-136	ENSRNOT00000024583	ENSRNOG00000018107	ENSRNOT00000024583			Zfand5			protein_coding
NA_peak_1456	16	71236371	71236371	+	2220471	NA	intron (ENSRNOT00000066974, intron 1 of 22)	protein_coding-intron (ENSRNOT00000066974, intron 1 of 22)	747	ENSRNOT00000066974	ENSRNOG00000015621	ENSRNOT00000066974			Nsd3			protein_coding
NA_peak_854	12	2461721	2461721	+	2215692	NA	intron (ENSRNOT00000001415, intron 1 of 5)	protein_coding-intron (ENSRNOT00000001415, intron 1 of 5)	219	ENSRNOT00000001415	ENSRNOG00000001069	ENSRNOT00000001415			Elavl1			protein_coding
NA_peak_277	1	211732667	211732667	+	2215692	NA	promoter-TSS (ENSRNOT00000054890)	protein_coding-promoter-TSS (ENSRNOT00000054890)	-46	ENSRNOT00000054890	ENSRNOG00000017635	ENSRNOT00000054890			Inpp5a			protein_coding
NA_peak_3537	8	22259510	22259510	+	2215692	NA	exon (ENSRNOT00000028360, exon 1 of 6)	protein_coding-exon (ENSRNOT00000028360, exon 1 of 6)	269	ENSRNOT00000028360	ENSRNOG00000020878	ENSRNOT00000028360			Keap1			protein_coding
NA_peak_2756	5	9171786	9171786	+	2215692	NA	Intergenic	Intergenic	-59198	ENSRNOT00000009136	ENSRNOG00000006980	ENSRNOT00000009136			Vcpip1			protein_coding
NA_peak_1974	2	140286905	140286905	+	2215692	NA	exon (ENSRNOT00000014348, exon 1 of 3)	protein_coding-exon (ENSRNOT00000014348, exon 1 of 3)	244	ENSRNOT00000014348	ENSRNOG00000010799	ENSRNOT00000014348			Noct			protein_coding
NA_peak_3003	5	160219733	160219733	+	2215692	NA	promoter-TSS (ENSRNOT00000016333)	protein_coding-promoter-TSS (ENSRNOT00000016333)	79	ENSRNOT00000016333	ENSRNOG00000012163	ENSRNOT00000016333			Plekhm2			protein_coding
NA_peak_1188	14	82048029	82048029	+	2215692	NA	exon (ENSRNOT00000074734, exon 1 of 3)	protein_coding-exon (ENSRNOT00000074734, exon 1 of 3)	222	ENSRNOT00000074734	ENSRNOG00000049351	ENSRNOT00000074734			Nat8l			protein_coding
NA_peak_1392	16	11029492	11029492	+	2215692	NA	Intergenic	Intergenic	-3039	ENSRNOT00000078390	ENSRNOG00000052513	ENSRNOT00000078390			Wapl			protein_coding
NA_peak_3934	X	73895785	73895785	+	2215692	NA	promoter-TSS (ENSRNOT00000029100)	processed_pseudogene-promoter-TSS (ENSRNOT00000029100)	-370	ENSRNOT00000029100	ENSRNOG00000022267	ENSRNOT00000029100			AABR07039334.1			processed_pseudogene
NA_peak_2644	4	98028115	98028115	+	2187454	NA	intron (ENSRNOT00000009503, intron 1 of 7)	protein_coding-intron (ENSRNOT00000009503, intron 1 of 7)	561	ENSRNOT00000009503	ENSRNOG00000005890	ENSRNOT00000009503			Serbp1			protein_coding
NA_peak_2005	2	178057361	178057361	+	2187454	NA	promoter-TSS (ENSRNOT00000091135)	protein_coding-promoter-TSS (ENSRNOT00000091135)	-204	ENSRNOT00000091135	ENSRNOG00000021581	ENSRNOT00000091135			Rapgef2			protein_coding
NA_peak_2982	5	155204366	155204366	+	2187454	NA	promoter-TSS (ENSRNOT00000089574)	protein_coding-promoter-TSS (ENSRNOT00000089574)	90	ENSRNOT00000089574	ENSRNOG00000012531	ENSRNOT00000016983			Ephb2			protein_coding
NA_peak_2252	3	7800131	7800131	+	2187454	NA	Intergenic	Intergenic	-3746	ENSRNOT00000082489	ENSRNOG00000013694	ENSRNOT00000045919			Ntng2			protein_coding
NA_peak_1933	2	93519099	93519099	+	2187454	NA	intron (ENSRNOT00000050987, intron 1 of 7)	protein_coding-intron (ENSRNOT00000050987, intron 1 of 7)	293	ENSRNOT00000050987	ENSRNOG00000009953	ENSRNOT00000083909			Snx16			protein_coding
NA_peak_56	1	48626057	48626057	+	2187454	NA	intron (ENSRNOT00000064018, intron 1 of 23)	protein_coding-intron (ENSRNOT00000064018, intron 1 of 23)	303	ENSRNOT00000084317	ENSRNOG00000017419	ENSRNOT00000064018			Map3k4			protein_coding
NA_peak_2177	20	22882567	22882567	+	2187454	NA	exon (ENSRNOT00000000804, exon 1 of 26)	protein_coding-exon (ENSRNOT00000000804, exon 1 of 26)	105	ENSRNOT00000000804	ENSRNOG00000000648	ENSRNOT00000000804			Jmjd1c			protein_coding
NA_peak_1877	2	23940820	23940820	+	2187454	NA	intron (ENSRNOT00000084729, intron 1 of 7)	protein_coding-intron (ENSRNOT00000084729, intron 1 of 7)	264	ENSRNOT00000084729	ENSRNOG00000061582	ENSRNOT00000084729			Scamp1			protein_coding
NA_peak_3455	7	125893072	125893072	+	2187454	NA	promoter-TSS (ENSRNOT00000042070)	protein_coding-promoter-TSS (ENSRNOT00000042070)	96	ENSRNOT00000042070	ENSRNOG00000031269	ENSRNOT00000042070			RGD1304694			protein_coding
NA_peak_3627	8	70861036	70861036	+	2187454	NA	intron (ENSRNOT00000019258, intron 1 of 5)	protein_coding-intron (ENSRNOT00000019258, intron 1 of 5)	365	ENSRNOT00000019258	ENSRNOG00000014340	ENSRNOT00000019258			Pdcd7			protein_coding
NA_peak_3019	5	166533367	166533367	+	2187454	NA	exon (ENSRNOT00000045063, exon 1 of 17)	protein_coding-exon (ENSRNOT00000045063, exon 1 of 17)	186	ENSRNOT00000045063	ENSRNOG00000016398	ENSRNOT00000045063			Clstn1			protein_coding
NA_peak_2614	4	67520305	67520305	+	2187454	NA	promoter-TSS (ENSRNOT00000014604)	protein_coding-promoter-TSS (ENSRNOT00000014604)	51	ENSRNOT00000014604	ENSRNOG00000010957	ENSRNOT00000014604			Braf			protein_coding
NA_peak_288	1	219001682	219001682	+	2151306	NA	exon (ENSRNOT00000022486, exon 2 of 12)	protein_coding-exon (ENSRNOT00000022486, exon 2 of 12)	838	ENSRNOT00000022486	ENSRNOG00000016790	ENSRNOT00000022486			Kmt5b			protein_coding
NA_peak_3586	8	58253369	58253369	+	2151306	NA	exon (ENSRNOT00000010956, exon 1 of 19)	protein_coding-exon (ENSRNOT00000010956, exon 1 of 19)	319	ENSRNOT00000010956	ENSRNOG00000008039	ENSRNOT00000010956			Cul5			protein_coding
NA_peak_3263	7	11148796	11148796	+	2151306	NA	Intergenic	Intergenic	-3242	ENSRNOT00000006168	ENSRNOG00000004505	ENSRNOT00000006168			Nfic			protein_coding
NA_peak_1712	18	72549946	72549946	+	2135262	NA	promoter-TSS (ENSRNOT00000046847)	protein_coding-promoter-TSS (ENSRNOT00000046847)	-273	ENSRNOT00000046847	ENSRNOG00000018140	ENSRNOT00000046847			Smad2			protein_coding
NA_peak_3780	9	42619740	42619740	+	2135262	NA	promoter-TSS (ENSRNOT00000019966)	protein_coding-promoter-TSS (ENSRNOT00000019966)	-266	ENSRNOT00000019966	ENSRNOG00000014516	ENSRNOT00000019966			Hs6st1			protein_coding
NA_peak_464	10	14634528	14634528	+	2135262	NA	Intergenic	Intergenic	-4377	ENSRNOT00000024406	ENSRNOG00000017907	ENSRNOT00000024406			Ube2i			protein_coding
NA_peak_3506	7	141423925	141423925	+	2135262	NA	intron (ENSRNOT00000084292, intron 1 of 10)	protein_coding-intron (ENSRNOT00000080109, intron 1 of 9)	300	ENSRNOT00000080109	ENSRNOG00000052990	ENSRNOT00000080109			Cers5			protein_coding
NA_peak_3144	6	91696911	91696911	+	2135262	NA	promoter-TSS (ENSRNOT00000006355)	protein_coding-promoter-TSS (ENSRNOT00000006355)	-198	ENSRNOT00000006355	ENSRNOG00000004791	ENSRNOT00000006355			Arf6			protein_coding
NA_peak_2306	3	38400479	38400479	+	2135262	NA	Intergenic	Intergenic	32923	ENSRNOT00000049144	ENSRNOG00000029793	ENSRNOT00000049144			RGD1559995			protein_coding
NA_peak_734	11	1896136	1896136	+	2134362	NA	promoter-TSS (ENSRNOT00000000909)	protein_coding-promoter-TSS (ENSRNOT00000000909)	-73	ENSRNOT00000000909	ENSRNOG00000000718	ENSRNOT00000000909			Cggbp1			protein_coding
NA_peak_2098	2	248840552	248840552	+	2134362	NA	exon (ENSRNOT00000031748, exon 1 of 22)	protein_coding-exon (ENSRNOT00000031748, exon 1 of 22)	183	ENSRNOT00000031748	ENSRNOG00000011317	ENSRNOT00000031748			Pkn2			protein_coding
NA_peak_2365	3	81942395	81942395	+	2118327	NA	Intergenic	Intergenic	-31198	ENSRNOT00000066526	ENSRNOG00000008674	ENSRNOT00000066526			Prdm11			protein_coding
NA_peak_1577	17	60946529	60946529	+	2118327	NA	promoter-TSS (ENSRNOT00000058852)	protein_coding-promoter-TSS (ENSRNOT00000058852)	-103	ENSRNOT00000058852	ENSRNOG00000018698	ENSRNOT00000058852			Wac			protein_coding
NA_peak_1441	16	55132042	55132042	+	2118327	NA	exon (ENSRNOT00000017025, exon 1 of 14)	protein_coding-exon (ENSRNOT00000017025, exon 1 of 14)	149	ENSRNOT00000017025	ENSRNOG00000012767	ENSRNOT00000017025			Micu3			protein_coding
NA_peak_1279	15	25294551	25294551	+	2118327	NA	exon (ENSRNOT00000017871, exon 1 of 16)	protein_coding-exon (ENSRNOT00000017871, exon 1 of 16)	126	ENSRNOT00000017871	ENSRNOG00000013353	ENSRNOT00000017871			Tmem260			protein_coding
NA_peak_2042	2	200187412	200187412	+	2118327	NA	exon (ENSRNOT00000025718, exon 1 of 34)	protein_coding-exon (ENSRNOT00000025718, exon 1 of 34)	228	ENSRNOT00000025718	ENSRNOG00000018835	ENSRNOT00000025718			Notch2			protein_coding
NA_peak_3501	7	140806733	140806733	+	2118327	NA	intron (ENSRNOT00000086611, intron 1 of 14)	protein_coding-intron (ENSRNOT00000086611, intron 1 of 14)	17746	ENSRNOT00000086611	ENSRNOG00000057315	ENSRNOT00000086611			Kcnh3			protein_coding
NA_peak_3488	7	139557871	139557871	+	2118327	NA	Intergenic	Intergenic	-15410	ENSRNOT00000089425	ENSRNOG00000054297	ENSRNOT00000089425			Senp1			protein_coding
NA_peak_3773	9	37143476	37143476	+	2118327	NA	intron (ENSRNOT00000015638, intron 1 of 14)	protein_coding-intron (ENSRNOT00000015638, intron 1 of 14)	539	ENSRNOT00000015638	ENSRNOG00000011756	ENSRNOT00000015638			Phf3			protein_coding
NA_peak_3134	6	75886657	75886657	+	2118327	NA	Intergenic	Intergenic	-11502	ENSRNOT00000077276	ENSRNOG00000059541	ENSRNOT00000077276			U6			snRNA
NA_peak_202	1	165625222	165625222	+	2118327	NA	promoter-TSS (ENSRNOT00000087534)	protein_coding-promoter-TSS (ENSRNOT00000087534)	-128	ENSRNOT00000087534	ENSRNOG00000018176	ENSRNOT00000087534			Rab6a			protein_coding
NA_peak_3427	7	120345229	120345229	+	2118327	NA	promoter-TSS (ENSRNOT00000036357)	protein_coding-promoter-TSS (ENSRNOT00000036357)	49	ENSRNOT00000036357	ENSRNOG00000026212	ENSRNOT00000036357			Micall1			protein_coding
NA_peak_2090	2	241909579	241909579	+	2118327	NA	promoter-TSS (ENSRNOT00000047975)	protein_coding-promoter-TSS (ENSRNOT00000047975)	-253	ENSRNOT00000047975	ENSRNOG00000009882	ENSRNOT00000047975			Ppp3ca			protein_coding
NA_peak_2764	5	21632886	21632886	+	2118327	NA	promoter-TSS (ENSRNOT00000008522)	protein_coding-promoter-TSS (ENSRNOT00000008522)	-40	ENSRNOT00000008522	ENSRNOG00000005963	ENSRNOT00000008522			Rab2a			protein_coding
NA_peak_3473	7	132757284	132757284	+	2118327	NA	exon (ENSRNOT00000021153, exon 1 of 10)	protein_coding-exon (ENSRNOT00000021153, exon 1 of 10)	274	ENSRNOT00000021153	ENSRNOG00000015741	ENSRNOT00000021153			Slc2a13			protein_coding
NA_peak_3004	5	160282668	160282668	+	2118327	NA	exon (ENSRNOT00000016352, exon 1 of 10)	protein_coding-exon (ENSRNOT00000016352, exon 1 of 10)	142	ENSRNOT00000076160	ENSRNOG00000012274	ENSRNOT00000076160			Ddi2			protein_coding
NA_peak_3310	7	27213538	27213538	+	2118327	NA	exon (ENSRNOT00000077041, exon 1 of 10)	protein_coding-exon (ENSRNOT00000077041, exon 1 of 10)	113	ENSRNOT00000077041	ENSRNOG00000027124	ENSRNOT00000077041			Tdg			protein_coding
NA_peak_1260	15	12514256	12514256	+	2118327	NA	promoter-TSS (ENSRNOT00000010103)	protein_coding-promoter-TSS (ENSRNOT00000010103)	-325	ENSRNOT00000010103	ENSRNOG00000007246	ENSRNOT00000010103			Atxn7			protein_coding
NA_peak_1364	15	105851481	105851481	+	2118327	NA	promoter-TSS (ENSRNOT00000086959)	protein_coding-promoter-TSS (ENSRNOT00000086959)	-61	ENSRNOT00000086959	ENSRNOG00000051564	ENSRNOT00000086959			Rap2a			protein_coding
NA_peak_1876	2	23705667	23705667	+	2118327	NA	Intergenic	Intergenic	-65054	ENSRNOT00000014795	ENSRNOG00000011032	ENSRNOT00000014795			Lhfpl2			protein_coding
NA_peak_1391	16	10851916	10851916	+	2102831	NA	Intergenic	Intergenic	-49404	ENSRNOT00000079554	ENSRNOG00000052469	ENSRNOT00000079554			Bmpr1a			protein_coding
NA_peak_1413	16	20825122	20825122	+	2102831	NA	promoter-TSS (ENSRNOT00000027268)	protein_coding-promoter-TSS (ENSRNOT00000027268)	78	ENSRNOT00000027268	ENSRNOG00000020134	ENSRNOT00000027268			Upf1			protein_coding
NA_peak_507	10	39787015	39787015	+	2102831	NA	Intergenic	Intergenic	-20148	ENSRNOT00000083906	ENSRNOG00000052684	ENSRNOT00000083906			U6			snRNA
NA_peak_606	10	75270268	75270268	+	2102831	NA	intron (ENSRNOT00000012279, intron 1 of 2)	protein_coding-intron (ENSRNOT00000012279, intron 1 of 2)	293	ENSRNOT00000012279	ENSRNOG00000008921	ENSRNOT00000012279			Dynll2			protein_coding
NA_peak_458	10	13854361	13854361	+	2102831	NA	promoter-TSS (ENSRNOT00000004486)	protein_coding-promoter-TSS (ENSRNOT00000004486)	-1	ENSRNOT00000043951	ENSRNOG00000003195	ENSRNOT00000004486			Caskin1			protein_coding
NA_peak_1436	16	49328791	49328791	+	2095252	NA	intron (ENSRNOT00000049830, intron 32 of 60)	protein_coding-intron (ENSRNOT00000049830, intron 32 of 60)	-10408	ENSRNOT00000045721	ENSRNOG00000032192	ENSRNOT00000045721			Cfap97			protein_coding
NA_peak_2940	5	147714408	147714408	+	2095252	NA	exon (ENSRNOT00000012663, exon 1 of 2)	protein_coding-exon (ENSRNOT00000012663, exon 1 of 2)	245	ENSRNOT00000012663	ENSRNOG00000009113	ENSRNOT00000012663			Marcksl1			protein_coding
NA_peak_3191	6	110624703	110624703	+	2095252	NA	promoter-TSS (ENSRNOT00000014017)	protein_coding-promoter-TSS (ENSRNOT00000014017)	-153	ENSRNOT00000014017	ENSRNOG00000010457	ENSRNOT00000014017			Vash1			protein_coding
NA_peak_1319	15	48670003	48670003	+	2090271	NA	intron (ENSRNOT00000071464, intron 1 of 6)	protein_coding-intron (ENSRNOT00000071464, intron 1 of 6)	254	ENSRNOT00000071464	ENSRNOG00000047211	ENSRNOT00000071464			Fzd3			protein_coding
NA_peak_2411	3	122114519	122114519	+	2090271	NA	promoter-TSS (ENSRNOT00000006408)	protein_coding-promoter-TSS (ENSRNOT00000006408)	-235	ENSRNOT00000006408	ENSRNOG00000004763	ENSRNOT00000091935			Sirpa			protein_coding
NA_peak_3309	7	27082012	27082012	+	2090271	NA	intron (ENSRNOT00000066143, intron 1 of 7)	protein_coding-intron (ENSRNOT00000066143, intron 1 of 7)	345	ENSRNOT00000066143	ENSRNOG00000010309	ENSRNOT00000066143			Nfyb			protein_coding
NA_peak_223	1	181770560	181770560	+	2090271	NA	Intergenic	Intergenic	370010	ENSRNOT00000060098	ENSRNOG00000039241	ENSRNOT00000060098			Ythdc2			protein_coding
NA_peak_3454	7	125833853	125833853	+	2086792	NA	promoter-TSS (ENSRNOT00000080933)	protein_coding-promoter-TSS (ENSRNOT00000080933)	-134	ENSRNOT00000080933	ENSRNOG00000013423	ENSRNOT00000018155			Nup50			protein_coding
NA_peak_199	1	164425913	164425913	+	2086792	NA	exon (ENSRNOT00000023386, exon 1 of 6)	protein_coding-exon (ENSRNOT00000023386, exon 1 of 6)	438	ENSRNOT00000023386	ENSRNOG00000017365	ENSRNOT00000023386			Klhl35			protein_coding
NA_peak_1645	18	27576406	27576406	+	2069401	NA	intron (ENSRNOT00000070930, intron 1 of 22)	protein_coding-intron (ENSRNOT00000070930, intron 1 of 22)	277	ENSRNOT00000070930	ENSRNOG00000050200	ENSRNOT00000070930			Kdm3b			protein_coding
NA_peak_1478	16	83824294	83824294	+	2054601	NA	promoter-TSS (ENSRNOT00000032918)	protein_coding-promoter-TSS (ENSRNOT00000032918)	-136	ENSRNOT00000032918	ENSRNOG00000023509	ENSRNOT00000032918			Irs2			protein_coding
NA_peak_1383	16	7082379	7082379	+	2054601	NA	promoter-TSS (ENSRNOT00000013291)	protein_coding-promoter-TSS (ENSRNOT00000013291)	-71	ENSRNOT00000013291	ENSRNOG00000018179	ENSRNOT00000013291			Glt8d1			protein_coding
NA_peak_707	10	108132206	108132206	+	2054601	NA	exon (ENSRNOT00000072534, exon 1 of 6)	protein_coding-exon (ENSRNOT00000072534, exon 1 of 6)	101	ENSRNOT00000072534	ENSRNOG00000049215	ENSRNOT00000072534			Cbx2			protein_coding
NA_peak_1989	2	148607668	148607668	+	2052851	NA	promoter-TSS (ENSRNOT00000015119)	protein_coding-promoter-TSS (ENSRNOT00000015119)	-80	ENSRNOT00000088139	ENSRNOG00000038044	ENSRNOT00000088139			Tsc22d2			protein_coding
NA_peak_1374	16	2278839	2278839	+	2052851	NA	exon (ENSRNOT00000016233, exon 1 of 20)	protein_coding-exon (ENSRNOT00000016233, exon 1 of 20)	138	ENSRNOT00000016233	ENSRNOG00000011636	ENSRNOT00000016233			Dennd6a			protein_coding
NA_peak_3337	7	58286621	58286621	+	2052851	NA	promoter-TSS (ENSRNOT00000081416)	pseudogene-promoter-TSS (ENSRNOT00000081416)	149	ENSRNOT00000005258	ENSRNOG00000003923	ENSRNOT00000005258			Rab21			protein_coding
NA_peak_2515	3	175427025	175427025	+	2052851	NA	promoter-TSS (ENSRNOT00000082686)	protein_coding-promoter-TSS (ENSRNOT00000082686)	273	ENSRNOT00000085718	ENSRNOG00000060010	ENSRNOT00000085718			Ss18l1			protein_coding
NA_peak_3648	8	79606511	79606511	+	2052851	NA	promoter-TSS (ENSRNOT00000087114)	protein_coding-promoter-TSS (ENSRNOT00000087114)	-278	ENSRNOT00000087114	ENSRNOG00000051813	ENSRNOT00000087114			Pygo1			protein_coding
NA_peak_58	1	50827809	50827809	+	2052851	NA	promoter-TSS (ENSRNOT00000023290)	protein_coding-promoter-TSS (ENSRNOT00000023290)	-325	ENSRNOT00000089149	ENSRNOG00000048297	ENSRNOT00000086441			LOC108348175			protein_coding
NA_peak_2531	3	177095697	177095697	+	2046773	NA	promoter-TSS (ENSRNOT00000029386)	protein_coding-promoter-TSS (ENSRNOT00000029386)	-100	ENSRNOT00000029386	ENSRNOG00000036719	ENSRNOT00000029386			Samd10			protein_coding
NA_peak_182	1	146823631	146823631	+	2045403	NA	intron (ENSRNOT00000018098, intron 1 of 6)	protein_coding-intron (ENSRNOT00000018098, intron 1 of 6)	131	ENSRNOT00000018098	ENSRNOG00000013506	ENSRNOT00000018098			Zfand6			protein_coding
NA_peak_3504	7	141356149	141356149	+	2045403	NA	exon (ENSRNOT00000081195, exon 1 of 13)	protein_coding-exon (ENSRNOT00000081195, exon 1 of 13)	155	ENSRNOT00000081195	ENSRNOG00000061572	ENSRNOT00000081195			Smarcd1			protein_coding
NA_peak_876	12	13810273	13810273	+	2045403	NA	promoter-TSS (ENSRNOT00000038203)	protein_coding-promoter-TSS (ENSRNOT00000038203)	-23	ENSRNOT00000038203	ENSRNOG00000024482	ENSRNOT00000038203			Tnrc18			protein_coding
NA_peak_3377	7	75809626	75809626	+	2045403	NA	intron (ENSRNOT00000084114, intron 1 of 3)	protein_coding-intron (ENSRNOT00000084114, intron 1 of 3)	210	ENSRNOT00000084114	ENSRNOG00000060956	ENSRNOT00000084114			Zfp706			protein_coding
NA_peak_1025	13	73637788	73637788	+	2045403	NA	exon (ENSRNOT00000005195, exon 1 of 17)	protein_coding-exon (ENSRNOT00000005195, exon 1 of 17)	285	ENSRNOT00000005195	ENSRNOG00000003882	ENSRNOT00000005235			Cep350			protein_coding
NA_peak_3156	6	99400784	99400784	+	2045403	NA	promoter-TSS (ENSRNOT00000089594)	protein_coding-promoter-TSS (ENSRNOT00000089594)	38	ENSRNOT00000089594	ENSRNOG00000006441	ENSRNOT00000008424			Zbtb25			protein_coding
NA_peak_1603	17	85360081	85360081	+	2045403	NA	TTS (ENSRNOT00000022201)	protein_coding-TTS (ENSRNOT00000022201)	4039	ENSRNOT00000022201	ENSRNOG00000016383	ENSRNOT00000022201			Commd3			protein_coding
NA_peak_161	1	137014549	137014549	+	2045403	NA	intron (ENSRNOT00000014802, intron 1 of 38)	protein_coding-intron (ENSRNOT00000014802, intron 1 of 38)	277	ENSRNOT00000014802	ENSRNOG00000010964	ENSRNOT00000014802			Akap13			protein_coding
NA_peak_582	10	64862108	64862108	+	2045403	NA	promoter-TSS (ENSRNOT00000093678)	protein_coding-promoter-TSS (ENSRNOT00000093678)	24	ENSRNOT00000093678	ENSRNOG00000009566	ENSRNOT00000056234			Phf12			protein_coding
NA_peak_945	12	40895740	40895740	+	2045403	NA	intron (ENSRNOT00000046323, intron 1 of 15)	protein_coding-intron (ENSRNOT00000046323, intron 1 of 15)	225	ENSRNOT00000046323	ENSRNOG00000030124	ENSRNOT00000046323			Ptpn11			protein_coding
NA_peak_2397	3	113977095	113977095	+	2045403	NA	intron (ENSRNOT00000022437, intron 2 of 7)	protein_coding-intron (ENSRNOT00000022437, intron 2 of 7)	408	ENSRNOT00000022437	ENSRNOG00000016459	ENSRNOT00000022437			Eif3j			protein_coding
NA_peak_1061	13	100414139	100414139	+	2045403	NA	promoter-TSS (ENSRNOT00000085188)	protein_coding-promoter-TSS (ENSRNOT00000085188)	87	ENSRNOT00000085188	ENSRNOG00000031934	ENSRNOT00000039974			Enah			protein_coding
NA_peak_3901	9	121802793	121802793	+	2045403	NA	exon (ENSRNOT00000086534, exon 1 of 14)	protein_coding-exon (ENSRNOT00000086534, exon 1 of 14)	120	ENSRNOT00000086534	ENSRNOG00000037227	ENSRNOT00000086534			Yes1			protein_coding
NA_peak_2612	4	66980186	66980186	+	2045403	NA	Intergenic	Intergenic	-24454	ENSRNOT00000084282	ENSRNOG00000052445	ENSRNOT00000084282			Kdm7a			protein_coding
NA_peak_641	10	88619373	88619373	+	2045403	NA	exon (ENSRNOT00000055250, exon 1 of 18)	protein_coding-exon (ENSRNOT00000055250, exon 1 of 18)	164	ENSRNOT00000055250	ENSRNOG00000018364	ENSRNOT00000055250			Kat2a			protein_coding
NA_peak_3457	7	126553950	126553950	+	2045403	NA	Intergenic	Intergenic	-36262	ENSRNOT00000053584	ENSRNOG00000035461	ENSRNOT00000053584			Mirlet7c2			miRNA
NA_peak_2777	5	33696318	33696318	+	2045403	NA	Intergenic	Intergenic	-31883	ENSRNOT00000009047	ENSRNOG00000006328	ENSRNOT00000009047			Wwp1			protein_coding
NA_peak_1001	13	51385057	51385057	+	2013148	NA	intron (ENSRNOT00000087025, intron 1 of 24)	protein_coding-intron (ENSRNOT00000077928, intron 1 of 26)	495	ENSRNOT00000077928	ENSRNOG00000060544	ENSRNOT00000077928			Kdm5b			protein_coding
NA_peak_2074	2	225827559	225827559	+	2013148	NA	promoter-TSS (ENSRNOT00000018343)	protein_coding-promoter-TSS (ENSRNOT00000018343)	55	ENSRNOT00000018343	ENSRNOG00000013409	ENSRNOT00000018343			Gclm			protein_coding
NA_peak_3232	6	136704655	136704655	+	2013148	NA	TTS (ENSRNOT00000053612)	miRNA-TTS (ENSRNOT00000053612)	406	ENSRNOT00000053612	ENSRNOG00000035489	ENSRNOT00000053612			Mir3545			miRNA
NA_peak_1856	19	60017776	60017776	+	2013148	NA	promoter-TSS (ENSRNOT00000042623)	protein_coding-promoter-TSS (ENSRNOT00000042623)	30	ENSRNOT00000042623	ENSRNOG00000032437	ENSRNOT00000078559			Pard3			protein_coding
NA_peak_3849	9	88607702	88607702	+	2013148	NA	exon (ENSRNOT00000021309, exon 1 of 14)	protein_coding-exon (ENSRNOT00000021309, exon 1 of 14)	194	ENSRNOT00000021309	ENSRNOG00000015619	ENSRNOT00000021309			Agfg1			protein_coding
NA_peak_1220	14	100322970	100322970	+	2013148	NA	intron (ENSRNOT00000067846, intron 1 of 5)	protein_coding-intron (ENSRNOT00000031275, intron 1 of 5)	402	ENSRNOT00000067846	ENSRNOG00000043210	ENSRNOT00000067846			Ppp3r1			protein_coding
NA_peak_2467	3	155118979	155118979	+	2013148	NA	promoter-TSS (ENSRNOT00000032943)	protein_coding-promoter-TSS (ENSRNOT00000032943)	-63	ENSRNOT00000032943	ENSRNOG00000023989	ENSRNOT00000032943			Actr5			protein_coding
NA_peak_2216	20	48234608	48234608	+	2013148	NA	Intergenic	Intergenic	-13847	ENSRNOT00000071494	ENSRNOG00000046505	ENSRNOT00000071494			Bend3			protein_coding
NA_peak_3068	6	9482909	9482909	+	2013148	NA	promoter-TSS (ENSRNOT00000089272)	protein_coding-promoter-TSS (ENSRNOT00000089272)	-685	ENSRNOT00000089272	ENSRNOG00000060463	ENSRNOT00000089272			AABR07062799.2			protein_coding
NA_peak_2218	20	50172853	50172853	+	2013148	NA	intron (ENSRNOT00000091456, intron 1 of 16)	protein_coding-intron (ENSRNOT00000076640, intron 1 of 14)	235	ENSRNOT00000076640	ENSRNOG00000051061	ENSRNOT00000091456			Prep			protein_coding
NA_peak_2310	3	45683965	45683965	+	2013148	NA	promoter-TSS (ENSRNOT00000038983)	protein_coding-promoter-TSS (ENSRNOT00000038983)	-28	ENSRNOT00000038983	ENSRNOG00000025394	ENSRNOT00000038983			Tanc1			protein_coding
NA_peak_3695	8	117082758	117082758	+	2013148	NA	promoter-TSS (ENSRNOT00000075241)	protein_coding-promoter-TSS (ENSRNOT00000075241)	-596	ENSRNOT00000075241	ENSRNOG00000048237	ENSRNOT00000075241			Tcta			protein_coding
NA_peak_1089	14	2297037	2297037	+	2013148	NA	exon (ENSRNOT00000000071, exon 1 of 11)	protein_coding-exon (ENSRNOT00000000071, exon 1 of 11)	118	ENSRNOT00000000071	ENSRNOG00000000062	ENSRNOT00000000071			Pcgf3			protein_coding
NA_peak_3936	X	106823713	106823713	+	2013148	NA	intron (ENSRNOT00000045997, intron 1 of 2)	protein_coding-intron (ENSRNOT00000045997, intron 1 of 2)	222	ENSRNOT00000045997	ENSRNOG00000028822	ENSRNOT00000045997			Bex3			protein_coding
NA_peak_320	1	222590174	222590174	+	2013148	NA	promoter-TSS (ENSRNOT00000028763)	protein_coding-promoter-TSS (ENSRNOT00000028763)	46	ENSRNOT00000091990	ENSRNOG00000021184	ENSRNOT00000028763			Mark2			protein_coding
NA_peak_245	1	198225463	198225463	+	1997297	NA	exon (ENSRNOT00000026909, exon 1 of 8)	protein_coding-exon (ENSRNOT00000026909, exon 1 of 8)	117	ENSRNOT00000026909	ENSRNOG00000019813	ENSRNOT00000026909			Ppp4c			protein_coding
NA_peak_1228	14	104975428	104975428	+	1984161	NA	Intergenic	Intergenic	-12281	ENSRNOT00000043218	ENSRNOG00000029052	ENSRNOT00000043218			LOC108352861			processed_pseudogene
NA_peak_1558	17	37616343	37616343	+	1984161	NA	Intergenic	Intergenic	-1184	ENSRNOT00000080424	ENSRNOG00000058289	ENSRNOT00000080424			AABR07027575.1			pseudogene
NA_peak_225	1	183892907	183892907	+	1984161	NA	promoter-TSS (ENSRNOT00000015498)	protein_coding-promoter-TSS (ENSRNOT00000015498)	66	ENSRNOT00000015498	ENSRNOG00000011417	ENSRNOT00000015498			Pde3b			protein_coding
NA_peak_2560	4	10749472	10749472	+	1984161	NA	exon (ENSRNOT00000046142, exon 1 of 8)	protein_coding-exon (ENSRNOT00000046142, exon 1 of 8)	727	ENSRNOT00000046142	ENSRNOG00000013431	ENSRNOT00000046142			Rsbn1l			protein_coding
NA_peak_956	12	46789690	46789690	+	1984161	NA	promoter-TSS (ENSRNOT00000001517)	protein_coding-promoter-TSS (ENSRNOT00000001517)	36	ENSRNOT00000001517	ENSRNOG00000021871	ENSRNOT00000001517			Gcn1			protein_coding
NA_peak_1416	16	21198480	21198480	+	1984161	NA	intron (ENSRNOT00000027943, intron 1 of 12)	protein_coding-intron (ENSRNOT00000027943, intron 1 of 12)	20342	ENSRNOT00000027943	ENSRNOG00000022173	ENSRNOT00000027943			Gatad2a			protein_coding
NA_peak_1630	18	15905627	15905627	+	1984161	NA	Intergenic	Intergenic	16107	ENSRNOT00000022304	ENSRNOG00000016562	ENSRNOT00000022304			Zfp24			protein_coding
NA_peak_132	1	101802990	101802990	+	1984161	NA	exon (ENSRNOT00000028588, exon 1 of 12)	protein_coding-exon (ENSRNOT00000028588, exon 1 of 12)	210	ENSRNOT00000028588	ENSRNOG00000021051	ENSRNOT00000028588			Cyth2			protein_coding
NA_peak_2282	3	13824690	13824690	+	1979960	NA	TTS (ENSRNOT00000080186)	lincRNA-TTS (ENSRNOT00000080186)	180	ENSRNOT00000066961	ENSRNOG00000017925	ENSRNOT00000066961			Gapvd1			protein_coding
NA_peak_1063	13	100672494	100672494	+	1979960	NA	intron (ENSRNOT00000004319, intron 1 of 2)	protein_coding-intron (ENSRNOT00000004319, intron 1 of 2)	237	ENSRNOT00000004319	ENSRNOG00000003223	ENSRNOT00000004319			Degs1			protein_coding
NA_peak_679	10	102577607	102577607	+	1966085	NA	promoter-TSS (ENSRNOT00000091129)	protein_coding-promoter-TSS (ENSRNOT00000091129)	-729	ENSRNOT00000091129	ENSRNOG00000024711	ENSRNOT00000091129			Sdk2			protein_coding
NA_peak_1137	14	34528094	34528094	+	1966085	NA	exon (ENSRNOT00000003010, exon 1 of 6)	protein_coding-exon (ENSRNOT00000003010, exon 1 of 6)	168	ENSRNOT00000003010	ENSRNOG00000002199	ENSRNOT00000003010			Tmem165			protein_coding
NA_peak_258	1	200038187	200038187	+	1966085	NA	intron (ENSRNOT00000027630, intron 1 of 19)	protein_coding-intron (ENSRNOT00000027630, intron 1 of 19)	438	ENSRNOT00000027630	ENSRNOG00000020388	ENSRNOT00000027630			Inpp5f			protein_coding
NA_peak_2	1	1784239	1784239	+	1966085	NA	exon (ENSRNOT00000020098, exon 1 of 8)	protein_coding-exon (ENSRNOT00000020098, exon 1 of 8)	161	ENSRNOT00000020098	ENSRNOG00000014916	ENSRNOT00000020098			Lats1			protein_coding
NA_peak_3879	9	111327915	111327915	+	1966085	NA	intron (ENSRNOT00000045749, intron 1 of 2)	protein_coding-intron (ENSRNOT00000045749, intron 1 of 2)	513	ENSRNOT00000045749	ENSRNOG00000032398	ENSRNOT00000045749			RGD1562136			protein_coding
NA_peak_2760	5	14588279	14588279	+	1966085	NA	intron (ENSRNOT00000011312, intron 1 of 8)	protein_coding-intron (ENSRNOT00000011312, intron 1 of 8)	143	ENSRNOT00000011312	ENSRNOG00000008320	ENSRNOT00000011312			Lypla1			protein_coding
NA_peak_2016	2	187512556	187512556	+	1966085	NA	intron (ENSRNOT00000051394, intron 1 of 10)	protein_coding-intron (ENSRNOT00000051394, intron 1 of 10)	392	ENSRNOT00000051394	ENSRNOG00000031778	ENSRNOT00000051394			Mef2d			protein_coding
NA_peak_685	10	104263058	104263058	+	1966085	NA	promoter-TSS (ENSRNOT00000005347)	protein_coding-promoter-TSS (ENSRNOT00000005347)	13	ENSRNOT00000005347	ENSRNOG00000003990	ENSRNOT00000005347			Grb2			protein_coding
NA_peak_1019	13	70783277	70783277	+	1965650	NA	exon (ENSRNOT00000003605, exon 1 of 28)	protein_coding-exon (ENSRNOT00000003605, exon 1 of 28)	238	ENSRNOT00000003605	ENSRNOG00000002680	ENSRNOT00000092521			Lamc1			protein_coding
NA_peak_3113	6	51662700	51662700	+	1965650	NA	promoter-TSS (ENSRNOT00000065561)	pseudogene-promoter-TSS (ENSRNOT00000065561)	-239	ENSRNOT00000065561	ENSRNOG00000043366	ENSRNOT00000065561			AABR07063829.1			pseudogene
NA_peak_353	1	242441072	242441072	+	1965650	NA	promoter-TSS (ENSRNOT00000076537)	protein_coding-promoter-TSS (ENSRNOT00000076537)	175	ENSRNOT00000068645	ENSRNOG00000015232	ENSRNOT00000068645			Pip5k1b			protein_coding
NA_peak_1561	17	42268534	42268534	+	1963424	NA	intron (ENSRNOT00000083996, intron 1 of 5)	protein_coding-intron (ENSRNOT00000083996, intron 1 of 5)	-1455	ENSRNOT00000059564	ENSRNOG00000018456	ENSRNOT00000059564			LOC100911664			protein_coding
NA_peak_2654	4	100660099	100660099	+	1963424	NA	promoter-TSS (ENSRNOT00000020005)	protein_coding-promoter-TSS (ENSRNOT00000020005)	41	ENSRNOT00000020005	ENSRNOG00000014753	ENSRNOT00000020005			Tcf7l1			protein_coding
NA_peak_235	1	190964910	190964910	+	1963424	NA	promoter-TSS (ENSRNOT00000039186)	protein_coding-promoter-TSS (ENSRNOT00000039186)	25	ENSRNOT00000039186	ENSRNOG00000025940	ENSRNOT00000039186			Mettl9			protein_coding
NA_peak_1256	15	8125495	8125495	+	1963424	NA	promoter-TSS (ENSRNOT00000011653)	protein_coding-promoter-TSS (ENSRNOT00000011653)	-31	ENSRNOT00000011653	ENSRNOG00000008794	ENSRNOT00000011653			Ube2e1			protein_coding
NA_peak_2308	3	43128397	43128397	+	1963424	NA	Intergenic	Intergenic	-9238	ENSRNOT00000041394	ENSRNOG00000005600	ENSRNOT00000078001			Nr4a2			protein_coding
NA_peak_1569	17	53955282	53955282	+	1963424	NA	promoter-TSS (ENSRNOT00000022483)	protein_coding-promoter-TSS (ENSRNOT00000022483)	-921	ENSRNOT00000022483	ENSRNOG00000016767	ENSRNOT00000080101			Ggps1			protein_coding
NA_peak_2866	5	122746924	122746924	+	1963424	NA	promoter-TSS (ENSRNOT00000032126)	protein_coding-promoter-TSS (ENSRNOT00000032126)	-85	ENSRNOT00000032126	ENSRNOG00000022967	ENSRNOT00000032126			Slc35d1			protein_coding
NA_peak_61	1	52991962	52991962	+	1963424	NA	exon (ENSRNOT00000033528, exon 1 of 1)	protein_coding-exon (ENSRNOT00000033528, exon 1 of 1)	251	ENSRNOT00000033528	ENSRNOG00000024149	ENSRNOT00000033528			Prr18			protein_coding
NA_peak_1361	15	104187056	104187056	+	1963424	NA	intron (ENSRNOT00000014182, intron 1 of 11)	protein_coding-intron (ENSRNOT00000014182, intron 1 of 11)	264	ENSRNOT00000014182	ENSRNOG00000010352	ENSRNOT00000014182			Dnajc3			protein_coding
NA_peak_1677	18	48201993	48201993	+	1963424	NA	exon (ENSRNOT00000023507, exon 1 of 7)	protein_coding-exon (ENSRNOT00000023507, exon 1 of 7)	265	ENSRNOT00000023507	ENSRNOG00000017488	ENSRNOT00000023507			Snx24			protein_coding
NA_peak_2481	3	161212307	161212307	+	1963424	NA	promoter-TSS (ENSRNOT00000065751)	protein_coding-promoter-TSS (ENSRNOT00000065751)	-119	ENSRNOT00000065751	ENSRNOG00000042162	ENSRNOT00000065751			Wfdc3			protein_coding
NA_peak_1272	15	23580071	23580071	+	1963424	NA	intron (ENSRNOT00000085767, intron 1 of 5)	protein_coding-intron (ENSRNOT00000013331, intron 1 of 4)	271	ENSRNOT00000013331	ENSRNOG00000009811	ENSRNOT00000013331			Cnih1			protein_coding
NA_peak_79	1	78572764	78572764	+	1963424	NA	intron (ENSRNOT00000090519, intron 1 of 6)	protein_coding-intron (ENSRNOT00000090519, intron 1 of 6)	610	ENSRNOT00000090519	ENSRNOG00000015852	ENSRNOT00000021223			Arhgap35			protein_coding
NA_peak_363	1	247821584	247821584	+	1963424	NA	exon (ENSRNOT00000021958, exon 1 of 15)	protein_coding-exon (ENSRNOT00000021958, exon 1 of 15)	144	ENSRNOT00000021958	ENSRNOG00000010915	ENSRNOT00000021958			Ermp1			protein_coding
NA_peak_2093	2	243821010	243821010	+	1963424	NA	intron (ENSRNOT00000090526, intron 1 of 6)	protein_coding-intron (ENSRNOT00000090526, intron 1 of 6)	349	ENSRNOT00000090526	ENSRNOG00000052343	ENSRNOT00000090526			Eif4e			protein_coding
NA_peak_899	12	24324866	24324866	+	1963424	NA	exon (ENSRNOT00000001968, exon 1 of 13)	protein_coding-exon (ENSRNOT00000001968, exon 1 of 13)	276	ENSRNOT00000001968	ENSRNOG00000001449	ENSRNOT00000001968			Pom121			protein_coding
NA_peak_2157	20	10407309	10407309	+	1963424	NA	intron (ENSRNOT00000074081, intron 1 of 7)	protein_coding-intron (ENSRNOT00000074081, intron 1 of 7)	245	ENSRNOT00000074081	ENSRNOG00000045860	ENSRNOT00000074081			U2af1			protein_coding
NA_peak_1303	15	38276016	38276016	+	1963424	NA	exon (ENSRNOT00000015233, exon 1 of 12)	protein_coding-exon (ENSRNOT00000015233, exon 1 of 12)	143	ENSRNOT00000084698	ENSRNOG00000011168	ENSRNOT00000084698			Micu2			protein_coding
NA_peak_2118	20	3364967	3364967	+	1963424	NA	promoter-TSS (ENSRNOT00000085761)	protein_coding-promoter-TSS (ENSRNOT00000085761)	153	ENSRNOT00000001077	ENSRNOG00000000812	ENSRNOT00000001077			RGD1302996			protein_coding
NA_peak_3646	8	79159397	79159397	+	1963424	NA	promoter-TSS (ENSRNOT00000086841)	protein_coding-promoter-TSS (ENSRNOT00000086841)	27	ENSRNOT00000086841	ENSRNOG00000060367	ENSRNOT00000086841			Rfx7			protein_coding
NA_peak_2926	5	144274681	144274681	+	1963424	NA	intron (ENSRNOT00000065871, intron 1 of 17)	protein_coding-intron (ENSRNOT00000065871, intron 1 of 17)	300	ENSRNOT00000065871	ENSRNOG00000010237	ENSRNOT00000065871			Map7d1			protein_coding
NA_peak_3205	6	125082861	125082861	+	1963424	NA	Intergenic	Intergenic	-22379	ENSRNOT00000034961	ENSRNOG00000027773	ENSRNOT00000034961			Ppp4r3a			protein_coding
NA_peak_2328	3	57119085	57119085	+	1963424	NA	promoter-TSS (ENSRNOT00000083171)	protein_coding-promoter-TSS (ENSRNOT00000083171)	-84	ENSRNOT00000083171	ENSRNOG00000060572	ENSRNOT00000064203			Tlk1			protein_coding
NA_peak_1148	14	43205307	43205307	+	1963424	NA	Intergenic	Intergenic	38937	ENSRNOT00000077077	ENSRNOG00000059475	ENSRNOT00000077077			AABR07014987.1			lincRNA
NA_peak_2591	4	56115183	56115183	+	1963424	NA	promoter-TSS (ENSRNOT00000010673)	protein_coding-promoter-TSS (ENSRNOT00000010673)	-929	ENSRNOT00000010673	ENSRNOG00000008098	ENSRNOT00000010673			Lrrc4			protein_coding
NA_peak_2516	3	175493965	175493965	+	1960877	NA	intron (ENSRNOT00000087356, intron 1 of 13)	protein_coding-intron (ENSRNOT00000087356, intron 1 of 13)	267	ENSRNOT00000087356	ENSRNOG00000057756	ENSRNOT00000087356			Osbpl2			protein_coding
NA_peak_3678	8	109455331	109455331	+	1952257	NA	promoter-TSS (ENSRNOT00000039593)	protein_coding-promoter-TSS (ENSRNOT00000039593)	-455	ENSRNOT00000039593	ENSRNOG00000023021	ENSRNOT00000039593			Msl2			protein_coding
NA_peak_3060	6	3183203	3183203	+	1952257	NA	promoter-TSS (ENSRNOT00000009359)	protein_coding-promoter-TSS (ENSRNOT00000009359)	-207	ENSRNOT00000009359	ENSRNOG00000007106	ENSRNOT00000009359			Sos1			protein_coding
NA_peak_3601	8	62424538	62424538	+	1952257	NA	promoter-TSS (ENSRNOT00000091223)	protein_coding-promoter-TSS (ENSRNOT00000091223)	-235	ENSRNOT00000091223	ENSRNOG00000019374	ENSRNOT00000091223			Csk			protein_coding
NA_peak_166	1	141767522	141767522	+	1950612	NA	promoter-TSS (ENSRNOT00000064034)	protein_coding-promoter-TSS (ENSRNOT00000064034)	-418	ENSRNOT00000064034	ENSRNOG00000014278	ENSRNOT00000064034			Zfp710			protein_coding
NA_peak_2382	3	101051878	101051878	+	1936721	NA	promoter-TSS (ENSRNOT00000007681)	protein_coding-promoter-TSS (ENSRNOT00000007681)	-77	ENSRNOT00000007681	ENSRNOG00000005715	ENSRNOT00000007681			Lgr4			protein_coding
NA_peak_2396	3	113416088	113416088	+	1919404	NA	TTS (ENSRNOT00000063164)	miRNA-TTS (ENSRNOT00000063164)	314	ENSRNOT00000056151	ENSRNOG00000015277	ENSRNOT00000056151			Serf2			protein_coding
NA_peak_286	1	218919916	218919916	+	1918845	NA	intron (ENSRNOT00000022213, intron 1 of 22)	protein_coding-intron (ENSRNOT00000022213, intron 1 of 22)	178	ENSRNOT00000022213	ENSRNOG00000015911	ENSRNOT00000022213			Lrp5			protein_coding
NA_peak_425	1	280335194	280335194	+	1918845	NA	exon (ENSRNOT00000011743, exon 3 of 3)	protein_coding-exon (ENSRNOT00000011743, exon 3 of 3)	3619	ENSRNOT00000011743	ENSRNOG00000008824	ENSRNOT00000011743			Vax1			protein_coding
NA_peak_3917	X	15503400	15503400	+	1893691	NA	exon (ENSRNOT00000006233, exon 2 of 11)	protein_coding-exon (ENSRNOT00000006233, exon 2 of 11)	765	ENSRNOT00000006233	ENSRNOG00000008764	ENSRNOT00000006233			Otud5			protein_coding
NA_peak_1121	14	16342005	16342005	+	1893691	NA	exon (ENSRNOT00000002924, exon 2 of 8)	protein_coding-exon (ENSRNOT00000002924, exon 2 of 8)	469	ENSRNOT00000002924	ENSRNOG00000002125	ENSRNOT00000002924			Ccni			protein_coding
NA_peak_1681	18	52917307	52917307	+	1893691	NA	exon (ENSRNOT00000021921, exon 1 of 27)	protein_coding-exon (ENSRNOT00000021921, exon 1 of 27)	183	ENSRNOT00000021921	ENSRNOG00000015971	ENSRNOT00000021921			Slc12a2			protein_coding
NA_peak_3702	8	118192265	118192265	+	1893691	NA	Intergenic	Intergenic	-4474	ENSRNOT00000048764	ENSRNOG00000029194	ENSRNOT00000084838			Dhx30			protein_coding
NA_peak_3050	5	173183946	173183946	+	1893691	NA	promoter-TSS (ENSRNOT00000068062)	protein_coding-promoter-TSS (ENSRNOT00000068062)	-44	ENSRNOT00000068062	ENSRNOG00000042211	ENSRNOT00000068062			Tmem240			protein_coding
NA_peak_1860	2	2456968	2456968	+	1893691	NA	exon (ENSRNOT00000032974, exon 1 of 12)	protein_coding-exon (ENSRNOT00000032974, exon 1 of 12)	233	ENSRNOT00000032974	ENSRNOG00000027089	ENSRNOT00000032974			Ell2			protein_coding
NA_peak_1828	19	54477450	54477450	+	1893691	NA	Intergenic	Intergenic	-16033	ENSRNOT00000078002	ENSRNOG00000053910	ENSRNOT00000078002			AABR07044063.1			protein_coding
NA_peak_2945	5	150033230	150033230	+	1893691	NA	intron (ENSRNOT00000013301, intron 1 of 5)	protein_coding-intron (ENSRNOT00000013301, intron 1 of 5)	231	ENSRNOT00000013301	ENSRNOG00000010007	ENSRNOT00000013301			Srsf4			protein_coding
NA_peak_17	1	13473033	13473033	+	1889058	NA	Intergenic	Intergenic	-77663	ENSRNOT00000085519	ENSRNOG00000053347	ENSRNOT00000085519			Ccdc28a			protein_coding
NA_peak_3863	9	98394342	98394342	+	1878137	NA	Intergenic	Intergenic	-3786	ENSRNOT00000042082	ENSRNOG00000019953	ENSRNOT00000042082			Ube2f			protein_coding
NA_peak_3628	8	71168457	71168457	+	1871724	NA	intron (ENSRNOT00000081375, intron 1 of 7)	protein_coding-intron (ENSRNOT00000021337, intron 2 of 8)	360	ENSRNOT00000081375	ENSRNOG00000015896	ENSRNOT00000081375			Rbpms2			protein_coding
NA_peak_1949	2	107221710	107221710	+	1871724	NA	Intergenic	Intergenic	-11344	ENSRNOT00000015573	ENSRNOG00000011216	ENSRNOT00000015573			Tbl1xr1			protein_coding
NA_peak_85	1	80000348	80000348	+	1871724	NA	TTS (ENSRNOT00000020428)	protein_coding-TTS (ENSRNOT00000020428)	183	ENSRNOT00000084912	ENSRNOG00000060146	ENSRNOT00000084912			Six5			protein_coding
NA_peak_2645	4	98648851	98648851	+	1871724	NA	exon (ENSRNOT00000008451, exon 1 of 17)	protein_coding-exon (ENSRNOT00000008451, exon 1 of 17)	306	ENSRNOT00000008451	ENSRNOG00000006069	ENSRNOT00000008451			Eif2ak3			protein_coding
NA_peak_370	1	253186403	253186403	+	1871724	NA	promoter-TSS (ENSRNOT00000067822)	protein_coding-promoter-TSS (ENSRNOT00000067822)	292	ENSRNOT00000080928	ENSRNOG00000053699	ENSRNOT00000080928			AC096809.1			protein_coding
NA_peak_1831	19	55042792	55042792	+	1871724	NA	Intergenic	Intergenic	-51793	ENSRNOT00000068452	ENSRNOG00000043077	ENSRNOT00000068452			Zfpm1			protein_coding
NA_peak_2779	5	36076444	36076444	+	1871724	NA	promoter-TSS (ENSRNOT00000013599)	protein_coding-promoter-TSS (ENSRNOT00000013599)	-121	ENSRNOT00000013599	ENSRNOG00000010106	ENSRNOT00000013599			Faxc			protein_coding
NA_peak_1739	19	11473908	11473908	+	1871724	NA	intron (ENSRNOT00000082066, intron 1 of 15)	protein_coding-intron (ENSRNOT00000082066, intron 1 of 15)	367	ENSRNOT00000082066	ENSRNOG00000055446	ENSRNOT00000082066			Amfr			protein_coding
NA_peak_2378	3	94657362	94657362	+	1871724	NA	promoter-TSS (ENSRNOT00000077484)	protein_coding-promoter-TSS (ENSRNOT00000077484)	15	ENSRNOT00000077484	ENSRNOG00000042576	ENSRNOT00000077484			Tcp11l1			protein_coding
NA_peak_279	1	214897333	214897333	+	1871724	NA	Intergenic	Intergenic	-29839	ENSRNOT00000027134	ENSRNOG00000020021	ENSRNOT00000027134			Brsk2			protein_coding
NA_peak_398	1	265420502	265420502	+	1871724	NA	promoter-TSS (ENSRNOT00000072223)	protein_coding-promoter-TSS (ENSRNOT00000072223)	1	ENSRNOT00000072223	ENSRNOG00000046211	ENSRNOT00000072223			Fbxw4			protein_coding
NA_peak_1804	19	43853630	43853630	+	1871724	NA	Intergenic	Intergenic	-4693	ENSRNOT00000044844	ENSRNOG00000019036	ENSRNOT00000044844			Ldhd			protein_coding
NA_peak_780	11	61499420	61499420	+	1871724	NA	exon (ENSRNOT00000046208, exon 1 of 7)	protein_coding-exon (ENSRNOT00000046208, exon 1 of 7)	137	ENSRNOT00000046208	ENSRNOG00000027756	ENSRNOT00000046208			Usf3			protein_coding
NA_peak_1291	15	33536427	33536427	+	1861693	NA	intron (ENSRNOT00000019992, intron 1 of 1)	protein_coding-intron (ENSRNOT00000019992, intron 1 of 1)	719	ENSRNOT00000019992	ENSRNOG00000014904	ENSRNOT00000019992			Ppp1r3e			protein_coding
NA_peak_2153	20	8285744	8285744	+	1861693	NA	intron (ENSRNOT00000081715, intron 1 of 7)	protein_coding-intron (ENSRNOT00000065629, intron 1 of 7)	242	ENSRNOT00000081715	ENSRNOG00000047171	ENSRNOT00000065629			Rnf8			protein_coding
NA_peak_3269	7	11443406	11443406	+	1861693	NA	promoter-TSS (ENSRNOT00000082126)	protein_coding-promoter-TSS (ENSRNOT00000082126)	-49	ENSRNOT00000082126	ENSRNOG00000020161	ENSRNOT00000082126			Zbtb7a			protein_coding
NA_peak_2426	3	138116502	138116502	+	1842692	NA	intron (ENSRNOT00000055602, intron 1 of 23)	protein_coding-intron (ENSRNOT00000055602, intron 1 of 23)	162	ENSRNOT00000055602	ENSRNOG00000005958	ENSRNOT00000055602			Rrbp1			protein_coding
NA_peak_361	1	247688767	247688767	+	1842692	NA	promoter-TSS (ENSRNOT00000021783)	protein_coding-promoter-TSS (ENSRNOT00000021783)	-22	ENSRNOT00000021783	ENSRNOG00000016172	ENSRNOT00000021783			Ric1			protein_coding
NA_peak_247	1	198652588	198652588	+	1842692	NA	promoter-TSS (ENSRNOT00000023706)	protein_coding-promoter-TSS (ENSRNOT00000023706)	86	ENSRNOT00000023706	ENSRNOG00000017349	ENSRNOT00000023706			Tbc1d10b			protein_coding
NA_peak_2606	4	66002218	66002218	+	1842692	NA	exon (ENSRNOT00000018645, exon 1 of 4)	protein_coding-exon (ENSRNOT00000018645, exon 1 of 4)	226	ENSRNOT00000018645	ENSRNOG00000013944	ENSRNOT00000018645			Zc3hav1l			protein_coding
NA_peak_3212	6	128453056	128453056	+	1842692	NA	Intergenic	Intergenic	-18873	ENSRNOT00000014405	ENSRNOG00000010711	ENSRNOT00000014405			Dicer1			protein_coding
NA_peak_222	1	179010033	179010033	+	1842692	NA	exon (ENSRNOT00000017199, exon 1 of 6)	protein_coding-exon (ENSRNOT00000017199, exon 1 of 6)	224	ENSRNOT00000017199	ENSRNOG00000012258	ENSRNOT00000017199			Rras2			protein_coding
NA_peak_1901	2	43267269	43267269	+	1842692	NA	intron (ENSRNOT00000087031, intron 1 of 12)	protein_coding-intron (ENSRNOT00000087031, intron 1 of 12)	530	ENSRNOT00000087031	ENSRNOG00000013121	ENSRNOT00000087031			Mier3			protein_coding
NA_peak_703	10	106812988	106812988	+	1842095	NA	intron (ENSRNOT00000074225, intron 1 of 3)	protein_coding-intron (ENSRNOT00000074225, intron 1 of 3)	249	ENSRNOT00000074225	ENSRNOG00000050547	ENSRNOT00000074225			Syngr2			protein_coding
NA_peak_1377	16	3051578	3051578	+	1842095	NA	exon (ENSRNOT00000074069, exon 1 of 24)	protein_coding-exon (ENSRNOT00000074069, exon 1 of 24)	129	ENSRNOT00000074069	ENSRNOG00000014750	ENSRNOT00000074069			Tasor			protein_coding
NA_peak_2865	5	122647346	122647346	+	1842095	NA	promoter-TSS (ENSRNOT00000066041)	protein_coding-promoter-TSS (ENSRNOT00000066041)	65	ENSRNOT00000066041	ENSRNOG00000007175	ENSRNOT00000066041			Mier1			protein_coding
NA_peak_3687	8	115069091	115069091	+	1842095	NA	promoter-TSS (ENSRNOT00000014770)	protein_coding-promoter-TSS (ENSRNOT00000014770)	-4	ENSRNOT00000014770	ENSRNOG00000010789	ENSRNOT00000014770			Dusp7			protein_coding
NA_peak_2188	20	31313475	31313475	+	1842095	NA	exon (ENSRNOT00000036719, exon 1 of 4)	protein_coding-exon (ENSRNOT00000036719, exon 1 of 4)	457	ENSRNOT00000036719	ENSRNOG00000024839	ENSRNOT00000036719			Tysnd1			protein_coding
NA_peak_2575	4	29639167	29639167	+	1842095	NA	promoter-TSS (ENSRNOT00000073687)	protein_coding-promoter-TSS (ENSRNOT00000073687)	13	ENSRNOT00000073687	ENSRNOG00000047453	ENSRNOT00000073687			Casd1			protein_coding
NA_peak_3158	6	99613262	99613262	+	1842095	NA	Intergenic	Intergenic	-12044	ENSRNOT00000008573	ENSRNOG00000006570	ENSRNOT00000008573			Plekhg3			protein_coding
NA_peak_519	10	45659134	45659134	+	1842095	NA	promoter-TSS (ENSRNOT00000058327)	protein_coding-promoter-TSS (ENSRNOT00000058327)	-9	ENSRNOT00000058327	ENSRNOG00000003066	ENSRNOT00000058327			Wnt9a			protein_coding
NA_peak_1214	14	86674037	86674037	+	1842095	NA	intron (ENSRNOT00000079015, intron 1 of 4)	protein_coding-intron (ENSRNOT00000079015, intron 1 of 4)	220	ENSRNOT00000079015	ENSRNOG00000027864	ENSRNOT00000079015			Ppia			protein_coding
NA_peak_6	1	2949709	2949709	+	1842095	NA	Intergenic	Intergenic	-63356	ENSRNOT00000079768	ENSRNOG00000052788	ENSRNOT00000079768						snoRNA
NA_peak_1834	19	55367044	55367044	+	1842095	NA	exon (ENSRNOT00000091139, exon 1 of 51)	protein_coding-exon (ENSRNOT00000091139, exon 1 of 51)	309	ENSRNOT00000091139	ENSRNOG00000056786	ENSRNOT00000091139			Piezo1			protein_coding
NA_peak_1946	2	104134486	104134486	+	1836067	NA	promoter-TSS (ENSRNOT00000067725)	protein_coding-promoter-TSS (ENSRNOT00000067725)	-385	ENSRNOT00000067725	ENSRNOG00000013048	ENSRNOT00000088167			Pde7a			protein_coding
NA_peak_1520	17	11081965	11081965	+	1836067	NA	promoter-TSS (ENSRNOT00000024707)	protein_coding-promoter-TSS (ENSRNOT00000024707)	82	ENSRNOT00000024707	ENSRNOG00000018279	ENSRNOT00000024707			Sfxn1			protein_coding
NA_peak_366	1	250949912	250949912	+	1836067	NA	intron (ENSRNOT00000054761, intron 1 of 9)	protein_coding-intron (ENSRNOT00000054761, intron 1 of 9)	1785	ENSRNOT00000054761	ENSRNOG00000012536	ENSRNOT00000079942			Sgms1			protein_coding
NA_peak_478	10	18443728	18443728	+	1836067	NA	intron (ENSRNOT00000080021, intron 1 of 28)	protein_coding-intron (ENSRNOT00000059895, intron 1 of 27)	206	ENSRNOT00000059895	ENSRNOG00000005042	ENSRNOT00000059895			Ranbp17			protein_coding
NA_peak_3259	7	3333077	3333077	+	1836067	NA	intron (ENSRNOT00000010180, intron 1 of 7)	protein_coding-intron (ENSRNOT00000010180, intron 1 of 7)	289	ENSRNOT00000010180	ENSRNOG00000007650	ENSRNOT00000090381			Cd63			protein_coding
NA_peak_3218	6	132183501	132183501	+	1836067	NA	promoter-TSS (ENSRNOT00000079807)	protein_coding-promoter-TSS (ENSRNOT00000079807)	-67	ENSRNOT00000079807	ENSRNOG00000051719	ENSRNOT00000079807			AABR07065498.1			protein_coding
NA_peak_3722	8	128087389	128087389	+	1836067	NA	promoter-TSS (ENSRNOT00000019777)	protein_coding-promoter-TSS (ENSRNOT00000019777)	44	ENSRNOT00000019777	ENSRNOG00000014477	ENSRNOT00000019777			Acvr2b			protein_coding
NA_peak_2327	3	56966761	56966761	+	1836067	NA	intron (ENSRNOT00000088097, intron 1 of 9)	protein_coding-intron (ENSRNOT00000088097, intron 1 of 9)	107	ENSRNOT00000088097	ENSRNOG00000055853	ENSRNOT00000088097			Gorasp2			protein_coding
NA_peak_2275	3	11554402	11554402	+	1836067	NA	promoter-TSS (ENSRNOT00000073087)	protein_coding-promoter-TSS (ENSRNOT00000073087)	-55	ENSRNOT00000073087	ENSRNOG00000050834	ENSRNOT00000073087			Fam102a			protein_coding
NA_peak_3425	7	120260342	120260342	+	1836067	NA	intron (ENSRNOT00000082862, intron 2 of 3)	protein_coding-intron (ENSRNOT00000082862, intron 2 of 3)	-2712	ENSRNOT00000078383	ENSRNOG00000055408	ENSRNOT00000078383			Gcat			protein_coding
NA_peak_1711	18	71396983	71396983	+	1836067	NA	exon (ENSRNOT00000024831, exon 1 of 4)	protein_coding-exon (ENSRNOT00000024831, exon 1 of 4)	1153	ENSRNOT00000024831	ENSRNOG00000018359	ENSRNOT00000024831			Smad7			protein_coding
NA_peak_376	1	255842794	255842794	+	1834566	NA	promoter-TSS (ENSRNOT00000023562)	protein_coding-promoter-TSS (ENSRNOT00000023562)	11	ENSRNOT00000023562	ENSRNOG00000017396	ENSRNOT00000023562			Marchf5			protein_coding
NA_peak_3316	7	31871892	31871892	+	1834566	NA	exon (ENSRNOT00000012715, exon 1 of 9)	protein_coding-exon (ENSRNOT00000012715, exon 1 of 9)	531	ENSRNOT00000012715	ENSRNOG00000008797	ENSRNOT00000012715			Tmpo			protein_coding
NA_peak_570	10	63325999	63325999	+	1834566	NA	exon (ENSRNOT00000005262, exon 1 of 21)	protein_coding-exon (ENSRNOT00000005262, exon 1 of 21)	800	ENSRNOT00000005262	ENSRNOG00000003873	ENSRNOT00000005262			Cpd			protein_coding
NA_peak_492	10	35799839	35799839	+	1834566	NA	exon (ENSRNOT00000004361, exon 1 of 5)	protein_coding-exon (ENSRNOT00000004361, exon 1 of 5)	281	ENSRNOT00000004361	ENSRNOG00000003268	ENSRNOT00000004361			Maml1			protein_coding
NA_peak_647	10	90263189	90263189	+	1834566	NA	intron (ENSRNOT00000064283, intron 1 of 20)	protein_coding-intron (ENSRNOT00000048418, intron 1 of 19)	1828	ENSRNOT00000048418	ENSRNOG00000020937	ENSRNOT00000048418			Ubtf			protein_coding
NA_peak_761	11	38351356	38351356	+	1834566	NA	promoter-TSS (ENSRNOT00000046318)	protein_coding-promoter-TSS (ENSRNOT00000046318)	-172	ENSRNOT00000046318	ENSRNOG00000001620	ENSRNOT00000046318			Prdm15			protein_coding
NA_peak_3609	8	64268266	64268266	+	1834566	NA	exon (ENSRNOT00000013581, exon 1 of 14)	protein_coding-exon (ENSRNOT00000013581, exon 1 of 14)	289	ENSRNOT00000084758	ENSRNOG00000009887	ENSRNOT00000013581			Arih1			protein_coding
NA_peak_642	10	88755063	88755063	+	1811808	NA	promoter-TSS (ENSRNOT00000026354)	protein_coding-promoter-TSS (ENSRNOT00000026354)	-234	ENSRNOT00000026354	ENSRNOG00000019075	ENSRNOT00000081247			Stat5b			protein_coding
NA_peak_1195	14	83412943	83412943	+	1809726	NA	promoter-TSS (ENSRNOT00000024993)	protein_coding-promoter-TSS (ENSRNOT00000024993)	-25	ENSRNOT00000024993	ENSRNOG00000018475	ENSRNOT00000024993			Eif4enif1			protein_coding
NA_peak_3021	5	167030272	167030272	+	1809726	NA	exon (ENSRNOT00000023543, exon 1 of 5)	protein_coding-exon (ENSRNOT00000023543, exon 1 of 5)	169	ENSRNOT00000023543	ENSRNOG00000017523	ENSRNOT00000023543			H6pd			protein_coding
NA_peak_2755	5	8665858	8665858	+	1809726	NA	promoter-TSS (ENSRNOT00000007766)	protein_coding-promoter-TSS (ENSRNOT00000007766)	-342	ENSRNOT00000007766	ENSRNOG00000005703	ENSRNOT00000007766			Arfgef1			protein_coding
NA_peak_1629	18	15463133	15463133	+	1809726	NA	exon (ENSRNOT00000021764, exon 1 of 10)	protein_coding-exon (ENSRNOT00000021764, exon 1 of 10)	220	ENSRNOT00000021764	ENSRNOG00000015895	ENSRNOT00000021764			B4galt6			protein_coding
NA_peak_2861	5	119596585	119596585	+	1809726	NA	Intergenic	Intergenic	-31739	ENSRNOT00000012977	ENSRNOG00000031004	ENSRNOT00000012977			Cyp2j4			protein_coding
NA_peak_2710	4	151986651	151986651	+	1809726	NA	promoter-TSS (ENSRNOT00000000022)	pseudogene-promoter-TSS (ENSRNOT00000000022)	-427	ENSRNOT00000000022	ENSRNOG00000000021	ENSRNOT00000000022			AABR07061902.1			pseudogene
NA_peak_1842	19	56800653	56800653	+	1809726	NA	Intergenic	Intergenic	-1208	ENSRNOT00000024491	ENSRNOG00000018027	ENSRNOT00000058652			Taf5l			protein_coding
NA_peak_84	1	79981516	79981516	+	1809726	NA	exon (ENSRNOT00000020134, exon 1 of 5)	protein_coding-exon (ENSRNOT00000020134, exon 1 of 5)	161	ENSRNOT00000020134	ENSRNOG00000014984	ENSRNOT00000020134			Dmwd			protein_coding
NA_peak_3153	6	96811364	96811364	+	1809726	NA	intron (ENSRNOT00000049725, intron 1 of 14)	protein_coding-intron (ENSRNOT00000049725, intron 1 of 14)	457	ENSRNOT00000049725	ENSRNOG00000008292	ENSRNOT00000077935			Hif1a			protein_coding
NA_peak_801	11	71959268	71959268	+	1809726	NA	promoter-TSS (ENSRNOT00000049862)	protein_coding-promoter-TSS (ENSRNOT00000049862)	40	ENSRNOT00000049862	ENSRNOG00000001747	ENSRNOT00000077269			LOC100910732			protein_coding
NA_peak_1312	15	43733040	43733040	+	1809726	NA	exon (ENSRNOT00000015318, exon 1 of 10)	protein_coding-exon (ENSRNOT00000015318, exon 1 of 10)	142	ENSRNOT00000015318	ENSRNOG00000011158	ENSRNOT00000015318			Ppp2r2a			protein_coding
NA_peak_3417	7	117880094	117880094	+	1809726	NA	intron (ENSRNOT00000052227, intron 1 of 11)	protein_coding-intron (ENSRNOT00000052227, intron 1 of 11)	195	ENSRNOT00000052227	ENSRNOG00000016566	ENSRNOT00000052227			Arhgap39			protein_coding
NA_peak_2200	20	38936297	38936297	+	1809726	NA	intron (ENSRNOT00000001059, intron 1 of 11)	protein_coding-intron (ENSRNOT00000001059, intron 1 of 11)	477	ENSRNOT00000001059	ENSRNOG00000000808	ENSRNOT00000001059			Hsf2			protein_coding
NA_peak_1499	17	8336717	8336717	+	1809726	NA	Intergenic	Intergenic	-5685	ENSRNOT00000016704	ENSRNOG00000022870	ENSRNOT00000016704			Smad5			protein_coding
NA_peak_403	1	266256551	266256551	+	1809726	NA	exon (ENSRNOT00000027047, exon 1 of 6)	protein_coding-exon (ENSRNOT00000027047, exon 1 of 6)	754	ENSRNOT00000027047	ENSRNOG00000019968	ENSRNOT00000027047			Trim8			protein_coding
NA_peak_3393	7	98709225	98709225	+	1809726	NA	exon (ENSRNOT00000064122, exon 3 of 10)	protein_coding-exon (ENSRNOT00000064122, exon 3 of 10)	119	ENSRNOT00000064122	ENSRNOG00000008934	ENSRNOT00000064122			Tmem65			protein_coding
NA_peak_3211	6	127127789	127127789	+	1809726	NA	promoter-TSS (ENSRNOT00000011906)	protein_coding-promoter-TSS (ENSRNOT00000011906)	-376	ENSRNOT00000011906	ENSRNOG00000008915	ENSRNOT00000011906			Prima1			protein_coding
NA_peak_257	1	199224724	199224724	+	1809726	NA	promoter-TSS (ENSRNOT00000088606)	protein_coding-promoter-TSS (ENSRNOT00000088606)	-376	ENSRNOT00000088606	ENSRNOG00000055028	ENSRNOT00000088606			Setd1a			protein_coding
NA_peak_2646	4	99305805	99305805	+	1809726	NA	promoter-TSS (ENSRNOT00000038912)	protein_coding-promoter-TSS (ENSRNOT00000038912)	7	ENSRNOT00000038912	ENSRNOG00000028422	ENSRNOT00000038912			Rmnd5a			protein_coding
NA_peak_3088	6	26497159	26497159	+	1809726	NA	intron (ENSRNOT00000074938, intron 1 of 17)	protein_coding-intron (ENSRNOT00000074938, intron 1 of 17)	169	ENSRNOT00000074938	ENSRNOG00000050570	ENSRNOT00000074938			Nrbp1			protein_coding
NA_peak_312	1	221736029	221736029	+	1809726	NA	intron (ENSRNOT00000044866, intron 1 of 11)	protein_coding-intron (ENSRNOT00000028628, intron 1 of 12)	501	ENSRNOT00000044866	ENSRNOG00000021085	ENSRNOT00000044866			Sf1			protein_coding
NA_peak_788	11	67717460	67717460	+	1809726	NA	Intergenic	Intergenic	-14435	ENSRNOT00000078285	ENSRNOG00000051711	ENSRNOT00000084540			Kpna1			protein_coding
NA_peak_1356	15	100178327	100178327	+	1809726	NA	Intergenic	Intergenic	-1552	ENSRNOT00000053780	ENSRNOG00000035657	ENSRNOT00000053780			Mir17			miRNA
NA_peak_3161	6	100308104	100308104	+	1809726	NA	Intergenic	Intergenic	-29122	ENSRNOT00000011220	ENSRNOG00000008451	ENSRNOT00000011220			Fut8			protein_coding
NA_peak_858	12	7866184	7866184	+	1809726	NA	exon (ENSRNOT00000061229, exon 1 of 5)	protein_coding-exon (ENSRNOT00000061229, exon 1 of 5)	246	ENSRNOT00000061229	ENSRNOG00000000921	ENSRNOT00000061229			Ubl3			protein_coding
NA_peak_3041	5	172043797	172043797	+	1809726	NA	exon (ENSRNOT00000084942, exon 1 of 3)	pseudogene-exon (ENSRNOT00000084942, exon 1 of 3)	131	ENSRNOT00000084942	ENSRNOG00000053592	ENSRNOT00000084942			AABR07050646.1			pseudogene
NA_peak_1112	14	10770315	10770315	+	1809726	NA	promoter-TSS (ENSRNOT00000069193)	miRNA-promoter-TSS (ENSRNOT00000069193)	-180	ENSRNOT00000069193	ENSRNOG00000043926	ENSRNOT00000069193						miRNA
NA_peak_3117	6	54488427	54488427	+	1809726	NA	intron (ENSRNOT00000084661, intron 1 of 25)	protein_coding-intron (ENSRNOT00000005637, intron 1 of 22)	352	ENSRNOT00000005637	ENSRNOG00000004186	ENSRNOT00000005637			Snx13			protein_coding
NA_peak_433	10	4578668	4578668	+	1809726	NA	exon (ENSRNOT00000003332, exon 1 of 12)	protein_coding-exon (ENSRNOT00000003332, exon 1 of 12)	199	ENSRNOT00000003332	ENSRNOG00000002452	ENSRNOT00000003332			Txndc11			protein_coding
NA_peak_1351	15	88669970	88669970	+	1809726	NA	intron (ENSRNOT00000012881, intron 1 of 5)	protein_coding-intron (ENSRNOT00000012881, intron 1 of 5)	379	ENSRNOT00000012881	ENSRNOG00000009690	ENSRNOT00000012881			Obi1			protein_coding
NA_peak_3829	9	71230377	71230377	+	1809726	NA	intron (ENSRNOT00000018326, intron 1 of 8)	protein_coding-intron (ENSRNOT00000018326, intron 1 of 8)	269	ENSRNOT00000018326	ENSRNOG00000013412	ENSRNOT00000049654			Creb1			protein_coding
NA_peak_1939	2	94960126	94960126	+	1809726	NA	promoter-TSS (ENSRNOT00000087889)	pseudogene-promoter-TSS (ENSRNOT00000087889)	-35	ENSRNOT00000087889	ENSRNOG00000055011	ENSRNOT00000087889			AABR07009377.1			pseudogene
NA_peak_3047	5	172986577	172986577	+	1809726	NA	exon (ENSRNOT00000022900, exon 1 of 12)	protein_coding-exon (ENSRNOT00000022900, exon 1 of 12)	286	ENSRNOT00000022900	ENSRNOG00000016936	ENSRNOT00000022900			Nadk			protein_coding
NA_peak_3747	9	10733916	10733916	+	1809726	NA	intron (ENSRNOT00000071199, intron 1 of 22)	protein_coding-intron (ENSRNOT00000071199, intron 1 of 22)	157	ENSRNOT00000071199	ENSRNOG00000049221	ENSRNOT00000091450			Kdm4b			protein_coding
NA_peak_263	1	201430101	201430101	+	1809726	NA	intron (ENSRNOT00000027836, intron 1 of 12)	protein_coding-intron (ENSRNOT00000027836, intron 1 of 12)	330	ENSRNOT00000027836	ENSRNOG00000020497	ENSRNOT00000027836			Plekha1			protein_coding
NA_peak_2628	4	79846700	79846700	+	1809726	NA	exon (ENSRNOT00000029332, exon 1 of 12)	protein_coding-exon (ENSRNOT00000029332, exon 1 of 12)	179	ENSRNOT00000029332	ENSRNOG00000021579	ENSRNOT00000089973			Mpp6			protein_coding
NA_peak_2417	3	123808126	123808126	+	1805979	NA	exon (ENSRNOT00000033554, exon 1 of 7)	protein_coding-exon (ENSRNOT00000033554, exon 1 of 7)	174	ENSRNOT00000033554	ENSRNOG00000025286	ENSRNOT00000033554			Pank2			protein_coding
NA_peak_1822	19	53635904	53635904	+	1802304	NA	intron (ENSRNOT00000067141, intron 1 of 4)	protein_coding-intron (ENSRNOT00000051352, intron 2 of 8)	216	ENSRNOT00000067141	ENSRNOG00000017905	ENSRNOT00000051352			Map1lc3b			protein_coding
NA_peak_2819	5	70245906	70245906	+	1802304	NA	promoter-TSS (ENSRNOT00000082108)	protein_coding-promoter-TSS (ENSRNOT00000082108)	63	ENSRNOT00000083983	ENSRNOG00000055089	ENSRNOT00000083983			Slc44a1			protein_coding
NA_peak_1365	15	106257913	106257913	+	1802304	NA	intron (ENSRNOT00000072538, intron 1 of 20)	protein_coding-intron (ENSRNOT00000014859, intron 1 of 23)	263	ENSRNOT00000014859	ENSRNOG00000010989	ENSRNOT00000014859			Ipo5			protein_coding
NA_peak_314	1	222229869	222229869	+	1792351	NA	promoter-TSS (ENSRNOT00000051749)	protein_coding-promoter-TSS (ENSRNOT00000051749)	34	ENSRNOT00000051749	ENSRNOG00000021151	ENSRNOT00000051749			Ppp1r14b			protein_coding
NA_peak_2158	20	11060584	11060584	+	1792351	NA	Intergenic	Intergenic	23674	ENSRNOT00000082935	ENSRNOG00000051668	ENSRNOT00000082935			7SK			misc_RNA
NA_peak_168	1	142197941	142197941	+	1792351	NA	promoter-TSS (ENSRNOT00000015521)	protein_coding-promoter-TSS (ENSRNOT00000015521)	-759	ENSRNOT00000015521	ENSRNOG00000011352	ENSRNOT00000015521			Furin			protein_coding
NA_peak_704	10	106994793	106994793	+	1783440	NA	intron (ENSRNOT00000004007, intron 1 of 9)	protein_coding-intron (ENSRNOT00000004007, intron 1 of 9)	2858	ENSRNOT00000004007	ENSRNOG00000002949	ENSRNOT00000004007			Pgs1			protein_coding
NA_peak_2815	5	64282831	64282831	+	1783440	NA	intron (ENSRNOT00000011273, intron 1 of 2)	protein_coding-intron (ENSRNOT00000011273, intron 1 of 2)	480	ENSRNOT00000011273	ENSRNOG00000008159	ENSRNOT00000011273			Msantd3			protein_coding
NA_peak_3655	8	85059014	85059014	+	1783440	NA	promoter-TSS (ENSRNOT00000033196)	protein_coding-promoter-TSS (ENSRNOT00000033196)	-37	ENSRNOT00000033196	ENSRNOG00000006302	ENSRNOT00000033196			Gclc			protein_coding
NA_peak_1756	19	22570221	22570221	+	1773187	NA	intron (ENSRNOT00000022573, intron 1 of 8)	protein_coding-intron (ENSRNOT00000022573, intron 1 of 8)	222	ENSRNOT00000022573	ENSRNOG00000016251	ENSRNOT00000022573			Dnaja2			protein_coding
NA_peak_720	10	109727373	109727373	+	1753325	NA	TTS (ENSRNOT00000054959)	protein_coding-TTS (ENSRNOT00000054959)	1646	ENSRNOT00000054959	ENSRNOG00000036690	ENSRNOT00000054959			Ppp1r27			protein_coding
NA_peak_683	10	103972961	103972961	+	1753325	NA	promoter-TSS (ENSRNOT00000004836)	protein_coding-promoter-TSS (ENSRNOT00000004836)	73	ENSRNOT00000067838	ENSRNOG00000023764	ENSRNOT00000067838			Kctd2			protein_coding
NA_peak_1921	2	62361003	62361003	+	1737162	NA	exon (ENSRNOT00000017276, exon 1 of 4)	protein_coding-exon (ENSRNOT00000017276, exon 1 of 4)	249	ENSRNOT00000017276	ENSRNOG00000012186	ENSRNOT00000017276			Golph3			protein_coding
NA_peak_1816	19	52225425	52225425	+	1737162	NA	promoter-TSS (ENSRNOT00000020917)	protein_coding-promoter-TSS (ENSRNOT00000020917)	-157	ENSRNOT00000020917	ENSRNOG00000015590	ENSRNOT00000020917			Dnaaf1			protein_coding
NA_peak_3018	5	166464380	166464380	+	1737162	NA	intron (ENSRNOT00000055562, intron 1 of 4)	protein_coding-intron (ENSRNOT00000055562, intron 1 of 4)	128	ENSRNOT00000055562	ENSRNOG00000016313	ENSRNOT00000055562			Ctnnbip1			protein_coding
NA_peak_51	1	47162512	47162512	+	1737162	NA	intron (ENSRNOT00000068457, intron 1 of 16)	protein_coding-intron (ENSRNOT00000068457, intron 1 of 16)	118	ENSRNOT00000068457	ENSRNOG00000018158	ENSRNOT00000068457			Tmem181			protein_coding
NA_peak_3596	8	61290362	61290362	+	1737162	NA	promoter-TSS (ENSRNOT00000023084)	protein_coding-promoter-TSS (ENSRNOT00000023084)	-122	ENSRNOT00000023084	ENSRNOG00000017193	ENSRNOT00000023084			Lingo1			protein_coding
NA_peak_2727	4	161617657	161617657	+	1737162	NA	Intergenic	Intergenic	-30435	ENSRNOT00000050834	ENSRNOG00000005608	ENSRNOT00000050834			Tead4			protein_coding
NA_peak_1074	13	107471586	107471586	+	1737162	NA	exon (ENSRNOT00000003556, exon 1 of 18)	protein_coding-exon (ENSRNOT00000003556, exon 1 of 18)	257	ENSRNOT00000003556	ENSRNOG00000002627	ENSRNOT00000003556			Kctd3			protein_coding
NA_peak_2766	5	21770212	21770212	+	1737162	NA	Intergenic	Intergenic	-60670	ENSRNOT00000008901	ENSRNOG00000006689	ENSRNOT00000008901			Chd7			protein_coding
NA_peak_3591	8	59711743	59711743	+	1737162	NA	intron (ENSRNOT00000019539, intron 1 of 14)	protein_coding-intron (ENSRNOT00000019539, intron 1 of 14)	194	ENSRNOT00000019539	ENSRNOG00000014529	ENSRNOT00000019539			Ube2q2			protein_coding
NA_peak_1130	14	29227383	29227383	+	1737162	NA	Intergenic	Intergenic	5154	ENSRNOT00000087499	ENSRNOG00000057494	ENSRNOT00000087499			AABR07014739.1			protein_coding
NA_peak_12	1	8751443	8751443	+	1722343	NA	promoter-TSS (ENSRNOT00000030511)	protein_coding-promoter-TSS (ENSRNOT00000030511)	-245	ENSRNOT00000030511	ENSRNOG00000011411	ENSRNOT00000030511			Adgrg6			protein_coding
NA_peak_1740	19	12943156	12943156	+	1722343	NA	promoter-TSS (ENSRNOT00000064105)	protein_coding-promoter-TSS (ENSRNOT00000064105)	-193	ENSRNOT00000090886	ENSRNOG00000013742	ENSRNOT00000064105			Large1			protein_coding
NA_peak_2108	2	257604834	257604834	+	1722343	NA	Intergenic	Intergenic	-21549	ENSRNOT00000080993	ENSRNOG00000050321	ENSRNOT00000071770			Zzz3			protein_coding
NA_peak_738	11	15436356	15436356	+	1722343	NA	promoter-TSS (ENSRNOT00000002150)	protein_coding-promoter-TSS (ENSRNOT00000002150)	-26	ENSRNOT00000084928	ENSRNOG00000001573	ENSRNOT00000084928			Usp25			protein_coding
NA_peak_3157	6	99401987	99401987	+	1700911	NA	promoter-TSS (ENSRNOT00000078498)	protein_coding-promoter-TSS (ENSRNOT00000078498)	-373	ENSRNOT00000078498	ENSRNOG00000058593	ENSRNOT00000078498			Zbtb1			protein_coding
NA_peak_1300	15	37994805	37994805	+	1700911	NA	promoter-TSS (ENSRNOT00000082495)	lincRNA-promoter-TSS (ENSRNOT00000082495)	-584	ENSRNOT00000082495	ENSRNOG00000053491	ENSRNOT00000082495			LOC108352928			lincRNA
NA_peak_914	12	30810426	30810426	+	1700911	NA	exon (ENSRNOT00000093286, exon 1 of 1)	protein_coding-exon (ENSRNOT00000093286, exon 1 of 1)	538	ENSRNOT00000001235	ENSRNOG00000000931	ENSRNOT00000077977			Sfswap			protein_coding
NA_peak_3786	9	44126809	44126809	+	1700911	NA	intron (ENSRNOT00000024701, intron 1 of 15)	protein_coding-intron (ENSRNOT00000024701, intron 1 of 15)	110	ENSRNOT00000024701	ENSRNOG00000018276	ENSRNOT00000024701			Mgat4a			protein_coding
NA_peak_2088	2	240626753	240626753	+	1700911	NA	promoter-TSS (ENSRNOT00000066204)	protein_coding-promoter-TSS (ENSRNOT00000066204)	-683	ENSRNOT00000066204	ENSRNOG00000013741	ENSRNOT00000066204			Ube2d3			protein_coding
NA_peak_2418	3	123898194	123898194	+	1700911	NA	Intergenic	Intergenic	-48406	ENSRNOT00000028869	ENSRNOG00000021250	ENSRNOT00000028869			Rnf24			protein_coding
NA_peak_3767	9	20765222	20765222	+	1700911	NA	promoter-TSS (ENSRNOT00000016291)	protein_coding-promoter-TSS (ENSRNOT00000016291)	-74	ENSRNOT00000016291	ENSRNOG00000011987	ENSRNOT00000016291			Cd2ap			protein_coding
NA_peak_2245	3	6773958	6773958	+	1700911	NA	exon (ENSRNOT00000013443, exon 1 of 6)	protein_coding-exon (ENSRNOT00000013443, exon 1 of 6)	145	ENSRNOT00000065953	ENSRNOG00000009862	ENSRNOT00000065953			Olfm1			protein_coding
NA_peak_2835	5	79055582	79055582	+	1700911	NA	promoter-TSS (ENSRNOT00000010333)	protein_coding-promoter-TSS (ENSRNOT00000010333)	61	ENSRNOT00000010333	ENSRNOG00000007657	ENSRNOT00000010333			Col27a1			protein_coding
NA_peak_3136	6	76661616	76661616	+	1700911	NA	TTS (ENSRNOT00000072175)	miRNA-TTS (ENSRNOT00000072175)	200	ENSRNOT00000010876	ENSRNOG00000008225	ENSRNOT00000010876			AABR07064349.1			pseudogene
NA_peak_3127	6	72750126	72750126	+	1700911	NA	promoter-TSS (ENSRNOT00000035309)	protein_coding-promoter-TSS (ENSRNOT00000035309)	44	ENSRNOT00000035309	ENSRNOG00000006483	ENSRNOT00000035309			Heatr5a			protein_coding
NA_peak_1617	18	3317668	3317668	+	1700911	NA	promoter-TSS (ENSRNOT00000017187)	protein_coding-promoter-TSS (ENSRNOT00000017187)	-56	ENSRNOT00000017187	ENSRNOG00000012795	ENSRNOT00000017187			Cables1			protein_coding
NA_peak_2444	3	148940268	148940268	+	1700911	NA	Intergenic	Intergenic	-7390	ENSRNOT00000013881	ENSRNOG00000010417	ENSRNOT00000013881			Nol4l			protein_coding
NA_peak_1103	14	7169812	7169812	+	1700911	NA	intron (ENSRNOT00000003026, intron 1 of 9)	protein_coding-intron (ENSRNOT00000003026, intron 1 of 9)	293	ENSRNOT00000003026	ENSRNOG00000002214	ENSRNOT00000003026			Klhl8			protein_coding
NA_peak_1571	17	54281188	54281188	+	1700911	NA	intron (ENSRNOT00000024022, intron 1 of 18)	protein_coding-intron (ENSRNOT00000024022, intron 1 of 18)	337	ENSRNOT00000024022	ENSRNOG00000017791	ENSRNOT00000084919			Arhgap12			protein_coding
NA_peak_3659	8	87486332	87486332	+	1700911	NA	promoter-TSS (ENSRNOT00000015741)	protein_coding-promoter-TSS (ENSRNOT00000015741)	-95	ENSRNOT00000015741	ENSRNOG00000024336	ENSRNOT00000015741			Senp6			protein_coding
NA_peak_1039	13	85109821	85109821	+	1700911	NA	promoter-TSS (ENSRNOT00000087368)	protein_coding-promoter-TSS (ENSRNOT00000087368)	-277	ENSRNOT00000087368	ENSRNOG00000051941	ENSRNOT00000087368			Fam78b			protein_coding
NA_peak_1703	18	69783969	69783969	+	1700911	NA	intron (ENSRNOT00000049759, intron 1 of 15)	protein_coding-intron (ENSRNOT00000049759, intron 1 of 15)	130	ENSRNOT00000049759	ENSRNOG00000015582	ENSRNOT00000079093			Me2			protein_coding
NA_peak_2392	3	112675964	112675964	+	1700911	NA	exon (ENSRNOT00000014664, exon 3 of 29)	protein_coding-exon (ENSRNOT00000014664, exon 3 of 29)	592	ENSRNOT00000014664	ENSRNOG00000047427	ENSRNOT00000014664			Cdan1			protein_coding
NA_peak_3124	6	72462228	72462228	+	1700911	NA	exon (ENSRNOT00000077578, exon 1 of 18)	protein_coding-exon (ENSRNOT00000077578, exon 1 of 18)	251	ENSRNOT00000090716	ENSRNOG00000005765	ENSRNOT00000007887			Ap4s1			protein_coding
NA_peak_2247	3	7090507	7090507	+	1700911	NA	Intergenic	Intergenic	-19413	ENSRNOT00000084092	ENSRNOG00000010219	ENSRNOT00000084092			Ralgds			protein_coding
NA_peak_786	11	65759281	65759281	+	1700911	NA	exon (ENSRNOT00000034334, exon 1 of 4)	protein_coding-exon (ENSRNOT00000034334, exon 1 of 4)	300	ENSRNOT00000034334	ENSRNOG00000027151	ENSRNOT00000034334			Lrrc58			protein_coding
NA_peak_923	12	37575811	37575811	+	1700911	NA	Intergenic	Intergenic	-1061	ENSRNOT00000066253	ENSRNOG00000001062	ENSRNOT00000066253			Kmt5a			protein_coding
NA_peak_3631	8	73441610	73441610	+	1700911	NA	Intergenic	Intergenic	-79135	ENSRNOT00000087562	ENSRNOG00000052284	ENSRNOT00000087562			U6			snRNA
NA_peak_2582	4	40135901	40135901	+	1700911	NA	intron (ENSRNOT00000009752, intron 1 of 4)	protein_coding-intron (ENSRNOT00000009752, intron 1 of 4)	160	ENSRNOT00000009752	ENSRNOG00000007224	ENSRNOT00000009752			Bmt2			protein_coding
NA_peak_919	12	36872022	36872022	+	1700911	NA	promoter-TSS (ENSRNOT00000001334)	protein_coding-promoter-TSS (ENSRNOT00000001334)	2	ENSRNOT00000084236	ENSRNOG00000001004	ENSRNOT00000084236			Ncor2			protein_coding
NA_peak_2135	20	5933486	5933486	+	1700911	NA	promoter-TSS (ENSRNOT00000000618)	protein_coding-promoter-TSS (ENSRNOT00000000618)	-109	ENSRNOT00000000618	ENSRNOG00000000513	ENSRNOT00000000618			Mapk14			protein_coding
NA_peak_364	1	247978788	247978788	+	1700911	NA	promoter-TSS (ENSRNOT00000039428)	protein_coding-promoter-TSS (ENSRNOT00000039428)	-248	ENSRNOT00000039428	ENSRNOG00000026942	ENSRNOT00000039428			RGD1311595			protein_coding
NA_peak_3307	7	26360973	26360973	+	1700911	NA	intron (ENSRNOT00000011326, intron 1 of 32)	protein_coding-intron (ENSRNOT00000011326, intron 1 of 32)	248	ENSRNOT00000011326	ENSRNOG00000008331	ENSRNOT00000011326			Washc4			protein_coding
NA_peak_3853	9	92834625	92834625	+	1700911	NA	exon (ENSRNOT00000066440, exon 1 of 8)	protein_coding-exon (ENSRNOT00000066440, exon 1 of 8)	268	ENSRNOT00000066440	ENSRNOG00000017297	ENSRNOT00000066440			Cab39			protein_coding
NA_peak_1555	17	35678220	35678220	+	1700911	NA	exon (ENSRNOT00000024609, exon 1 of 2)	protein_coding-exon (ENSRNOT00000024609, exon 1 of 2)	236	ENSRNOT00000024609	ENSRNOG00000018281	ENSRNOT00000024609			Uqcrfs1			protein_coding
NA_peak_669	10	94460602	94460602	+	1700911	NA	exon (ENSRNOT00000014508, exon 1 of 13)	protein_coding-exon (ENSRNOT00000014508, exon 1 of 13)	130	ENSRNOT00000014508	ENSRNOG00000010557	ENSRNOT00000014508			Smarcd2			protein_coding
NA_peak_2716	4	155653631	155653631	+	1700911	NA	promoter-TSS (ENSRNOT00000065419)	protein_coding-promoter-TSS (ENSRNOT00000065419)	-87	ENSRNOT00000065419	ENSRNOG00000009000	ENSRNOT00000065419			Foxj2			protein_coding
NA_peak_948	12	44278679	44278679	+	1700911	NA	intron (ENSRNOT00000064900, intron 1 of 13)	protein_coding-intron (ENSRNOT00000001493, intron 20 of 27)	323	ENSRNOT00000064900	ENSRNOG00000001129	ENSRNOT00000064900			Fbxo21			protein_coding
NA_peak_706	10	107385925	107385925	+	1700911	NA	exon (ENSRNOT00000004290, exon 1 of 5)	protein_coding-exon (ENSRNOT00000004290, exon 1 of 5)	147	ENSRNOT00000004290	ENSRNOG00000003148	ENSRNOT00000004290			Timp2			protein_coding
NA_peak_2862	5	120091046	120091046	+	1700911	NA	Intergenic	Intergenic	-5028	ENSRNOT00000089593	ENSRNOG00000061163	ENSRNOT00000089593			U1			snRNA
NA_peak_413	1	274106745	274106745	+	1700337	NA	promoter-TSS (ENSRNOT00000020539)	protein_coding-promoter-TSS (ENSRNOT00000020539)	-243	ENSRNOT00000020539	ENSRNOG00000014833	ENSRNOT00000076197			Smndc1			protein_coding
NA_peak_2445	3	149221506	149221506	+	1700337	NA	promoter-TSS (ENSRNOT00000087752)	protein_coding-promoter-TSS (ENSRNOT00000087752)	97	ENSRNOT00000087752	ENSRNOG00000011798	ENSRNOT00000016220			Mapre1			protein_coding
NA_peak_813	11	76804533	76804533	+	1700337	NA	promoter-TSS (ENSRNOT00000002649)	protein_coding-promoter-TSS (ENSRNOT00000002649)	-23	ENSRNOT00000002649	ENSRNOG00000001930	ENSRNOT00000002649			Ccdc50			protein_coding
NA_peak_600	10	72909980	72909980	+	1700337	NA	exon (ENSRNOT00000004540, exon 1 of 6)	protein_coding-exon (ENSRNOT00000004540, exon 1 of 6)	430	ENSRNOT00000004540	ENSRNOG00000003329	ENSRNOT00000004540			Ppm1d			protein_coding
NA_peak_2858	5	117583866	117583866	+	1688497	NA	exon (ENSRNOT00000010933, exon 1 of 9)	protein_coding-exon (ENSRNOT00000010933, exon 1 of 9)	364	ENSRNOT00000010933	ENSRNOG00000007890	ENSRNOT00000084640			Usp1			protein_coding
NA_peak_1224	14	104375328	104375328	+	1688497	NA	intron (ENSRNOT00000006607, intron 1 of 8)	protein_coding-intron (ENSRNOT00000006607, intron 1 of 8)	321	ENSRNOT00000006607	ENSRNOG00000004959	ENSRNOT00000006607			Actr2			protein_coding
NA_peak_2269	3	10269416	10269416	+	1688497	NA	intron (ENSRNOT00000021871, intron 1 of 18)	protein_coding-intron (ENSRNOT00000021871, intron 1 of 18)	277	ENSRNOT00000021871	ENSRNOG00000009139	ENSRNOT00000093500			Fubp3			protein_coding
NA_peak_1891	2	33982963	33982963	+	1688497	NA	Intergenic	Intergenic	24133	ENSRNOT00000079589	ENSRNOG00000056649	ENSRNOT00000079589			AABR07007896.1			lincRNA
NA_peak_2775	5	28851095	28851095	+	1688497	NA	exon (ENSRNOT00000009759, exon 1 of 3)	protein_coding-exon (ENSRNOT00000009759, exon 1 of 3)	145	ENSRNOT00000009759	ENSRNOG00000007426	ENSRNOT00000009759			Tmem64			protein_coding
NA_peak_2298	3	32947119	32947119	+	1688497	NA	promoter-TSS (ENSRNOT00000007404)	protein_coding-promoter-TSS (ENSRNOT00000007404)	-259	ENSRNOT00000007404	ENSRNOG00000005334	ENSRNOT00000007404			Acvr2a			protein_coding
NA_peak_3146	6	92229438	92229438	+	1688497	NA	promoter-TSS (ENSRNOT00000006705)	protein_coding-promoter-TSS (ENSRNOT00000006705)	-178	ENSRNOT00000006705	ENSRNOG00000004923	ENSRNOT00000006705			Map4k5			protein_coding
NA_peak_2128	20	4576657	4576657	+	1688497	NA	exon (ENSRNOT00000047370, exon 1 of 27)	protein_coding-exon (ENSRNOT00000047370, exon 1 of 27)	123	ENSRNOT00000047370	ENSRNOG00000030630	ENSRNOT00000081456			Ehmt2			protein_coding
NA_peak_3771	9	30161635	30161635	+	1688497	NA	promoter-TSS (ENSRNOT00000071330)	protein_coding-promoter-TSS (ENSRNOT00000071330)	-57	ENSRNOT00000071330	ENSRNOG00000049127	ENSRNOT00000071330			Smap1			protein_coding
NA_peak_47	1	45881280	45881280	+	1678285	NA	Intergenic	Intergenic	-41942	ENSRNOT00000022939	ENSRNOG00000017030	ENSRNOT00000022939			Arid1b			protein_coding
NA_peak_3341	7	60210173	60210173	+	1678285	NA	intron (ENSRNOT00000080983, intron 1 of 6)	protein_coding-intron (ENSRNOT00000007472, intron 1 of 9)	309	ENSRNOT00000007472	ENSRNOG00000005642	ENSRNOT00000007472			Frs2			protein_coding
NA_peak_544	10	56237750	56237750	+	1678285	NA	promoter-TSS (ENSRNOT00000016163)	protein_coding-promoter-TSS (ENSRNOT00000016163)	-5	ENSRNOT00000016163	ENSRNOG00000011876	ENSRNOT00000016163			Fxr2			protein_coding
NA_peak_3398	7	104578656	104578656	+	1674441	NA	Intergenic	Intergenic	-22237	ENSRNOT00000090784	ENSRNOG00000061246	ENSRNOT00000078116			Fam49b			protein_coding
NA_peak_1226	14	104523003	104523003	+	1674441	NA	intron (ENSRNOT00000039523, intron 1 of 5)	protein_coding-intron (ENSRNOT00000039523, intron 1 of 5)	294	ENSRNOT00000039523	ENSRNOG00000027282	ENSRNOT00000039523			Cep68			protein_coding
NA_peak_3321	7	36000910	36000910	+	1674441	NA	promoter-TSS (ENSRNOT00000011178)	protein_coding-promoter-TSS (ENSRNOT00000011178)	-4	ENSRNOT00000011178	ENSRNOG00000007970	ENSRNOT00000011178			Plxnc1			protein_coding
NA_peak_3264	7	11201823	11201823	+	1674441	NA	intron (ENSRNOT00000005624, intron 1 of 13)	protein_coding-intron (ENSRNOT00000005624, intron 1 of 13)	133	ENSRNOT00000005624	ENSRNOG00000004169	ENSRNOT00000005624			Fzr1			protein_coding
NA_peak_569	10	62674205	62674205	+	1674441	NA	promoter-TSS (ENSRNOT00000019946)	protein_coding-promoter-TSS (ENSRNOT00000019946)	-356	ENSRNOT00000019946	ENSRNOG00000014742	ENSRNOT00000019946			Ankrd13b			protein_coding
NA_peak_1956	2	119197223	119197223	+	1674441	NA	promoter-TSS (ENSRNOT00000048030)	protein_coding-promoter-TSS (ENSRNOT00000048030)	-16	ENSRNOT00000048030	ENSRNOG00000030639	ENSRNOT00000048030			Usp13			protein_coding
NA_peak_2670	4	119958907	119958907	+	1674441	NA	intron (ENSRNOT00000016432, intron 1 of 5)	protein_coding-intron (ENSRNOT00000016432, intron 1 of 5)	266	ENSRNOT00000016432	ENSRNOG00000012247	ENSRNOT00000016432			Rab7a			protein_coding
NA_peak_3657	8	85413343	85413343	+	1674441	NA	promoter-TSS (ENSRNOT00000078159)	protein_coding-promoter-TSS (ENSRNOT00000078159)	141	ENSRNOT00000010961	ENSRNOG00000008214	ENSRNOT00000010961			Fbxo9			protein_coding
NA_peak_3235	6	137243335	137243335	+	1674441	NA	intron (ENSRNOT00000030879, intron 1 of 1)	protein_coding-intron (ENSRNOT00000030879, intron 1 of 1)	150	ENSRNOT00000030879	ENSRNOG00000037562	ENSRNOT00000030879			Zbtb42			protein_coding
NA_peak_539	10	53037859	53037859	+	1674441	NA	promoter-TSS (ENSRNOT00000057509)	protein_coding-promoter-TSS (ENSRNOT00000057509)	-43	ENSRNOT00000057509	ENSRNOG00000029012	ENSRNOT00000057509			Shisa6			protein_coding
NA_peak_2471	3	156868054	156868054	+	1674441	NA	Intergenic	Intergenic	-18400	ENSRNOT00000022403	ENSRNOG00000016636	ENSRNOT00000022403			Lpin3			protein_coding
NA_peak_227	1	187882918	187882918	+	1674441	NA	promoter-TSS (ENSRNOT00000072266)	processed_transcript-promoter-TSS (ENSRNOT00000072266)	-63	ENSRNOT00000092681	ENSRNOG00000047386	ENSRNOT00000092374			Smg1			processed_transcript
NA_peak_844	11	88016614	88016614	+	1674441	NA	intron (ENSRNOT00000079595, intron 1 of 2)	protein_coding-intron (ENSRNOT00000079595, intron 1 of 2)	211	ENSRNOT00000079595	ENSRNOG00000051458	ENSRNOT00000079595			Hic2			protein_coding
NA_peak_3532	8	14028112	14028112	+	1673896	NA	Intergenic	Intergenic	-32282	ENSRNOT00000014827	ENSRNOG00000011162	ENSRNOT00000014827			Smco4			protein_coding
NA_peak_984	12	52506491	52506491	+	1669165	NA	promoter-TSS (ENSRNOT00000089449)	protein_coding-promoter-TSS (ENSRNOT00000089449)	-4	ENSRNOT00000089449	ENSRNOG00000060144	ENSRNOT00000089449			Ankle2			protein_coding
NA_peak_3345	7	61799128	61799128	+	1669165	NA	promoter-TSS (ENSRNOT00000010283)	protein_coding-promoter-TSS (ENSRNOT00000010283)	-399	ENSRNOT00000010283	ENSRNOG00000007821	ENSRNOT00000010283			Dyrk2			protein_coding
NA_peak_789	11	68198947	68198947	+	1669165	NA	exon (ENSRNOT00000003048, exon 1 of 9)	protein_coding-exon (ENSRNOT00000003048, exon 1 of 9)	238	ENSRNOT00000003048	ENSRNOG00000002240	ENSRNOT00000003048			Slc49a4			protein_coding
NA_peak_2009	2	185268434	185268434	+	1669165	NA	exon (ENSRNOT00000093712, exon 1 of 3)	protein_coding-exon (ENSRNOT00000093712, exon 1 of 3)	175	ENSRNOT00000093712	ENSRNOG00000011752	ENSRNOT00000093227			Sh3d19			protein_coding
NA_peak_128	1	101610311	101610311	+	1669165	NA	promoter-TSS (ENSRNOT00000032535)	protein_coding-promoter-TSS (ENSRNOT00000032535)	-462	ENSRNOT00000032535	ENSRNOG00000021004	ENSRNOT00000032535			Rasip1			protein_coding
NA_peak_2484	3	161345277	161345277	+	1665989	NA	intron (ENSRNOT00000023202, intron 1 of 16)	protein_coding-intron (ENSRNOT00000023202, intron 1 of 16)	1394	ENSRNOT00000023202	ENSRNOG00000016870	ENSRNOT00000023202			Pcif1			protein_coding
NA_peak_3331	7	51352696	51352696	+	1665989	NA	exon (ENSRNOT00000008222, exon 1 of 6)	protein_coding-exon (ENSRNOT00000008222, exon 1 of 6)	372	ENSRNOT00000008222	ENSRNOG00000005917	ENSRNOT00000008222			Pawr			protein_coding
NA_peak_360	1	247398652	247398652	+	1665989	NA	promoter-TSS (ENSRNOT00000087011)	protein_coding-promoter-TSS (ENSRNOT00000087011)	54	ENSRNOT00000087011	ENSRNOG00000059968	ENSRNOT00000087011			Jak2			protein_coding
NA_peak_1738	19	10898343	10898343	+	1658368	NA	Intergenic	Intergenic	-14296	ENSRNOT00000063791	ENSRNOG00000043286	ENSRNOT00000063791			Cpne2			protein_coding
NA_peak_616	10	82399333	82399333	+	1658368	NA	intron (ENSRNOT00000082972, intron 1 of 11)	protein_coding-intron (ENSRNOT00000055582, intron 1 of 10)	151	ENSRNOT00000082972	ENSRNOG00000003728	ENSRNOT00000055582			Xylt2			protein_coding
NA_peak_3553	8	36625729	36625729	+	1658368	NA	promoter-TSS (ENSRNOT00000016248)	protein_coding-promoter-TSS (ENSRNOT00000016248)	-4	ENSRNOT00000016248	ENSRNOG00000011789	ENSRNOT00000016248			Cdon			protein_coding
NA_peak_2660	4	115601950	115601950	+	1658368	NA	intron (ENSRNOT00000019617, intron 1 of 27)	protein_coding-intron (ENSRNOT00000019617, intron 1 of 27)	289	ENSRNOT00000019617	ENSRNOG00000014501	ENSRNOT00000019617			Zfp638			protein_coding
NA_peak_2466	3	154894323	154894323	+	1658368	NA	Intergenic	Intergenic	-10818	ENSRNOT00000088748	ENSRNOG00000014836	ENSRNOT00000020556			Ralgapb			protein_coding
NA_peak_950	12	44999245	44999245	+	1658368	NA	promoter-TSS (ENSRNOT00000038293)	protein_coding-promoter-TSS (ENSRNOT00000038293)	-86	ENSRNOT00000038293	ENSRNOG00000022698	ENSRNOT00000038293			Vsig10			protein_coding
NA_peak_3435	7	120923552	120923552	+	1658368	NA	intron (ENSRNOT00000049247, intron 1 of 11)	protein_coding-intron (ENSRNOT00000049247, intron 1 of 11)	278	ENSRNOT00000049247	ENSRNOG00000014634	ENSRNOT00000049247			Gtpbp1			protein_coding
NA_peak_2573	4	27647143	27647143	+	1658368	NA	promoter-TSS (ENSRNOT00000067376)	protein_coding-promoter-TSS (ENSRNOT00000067376)	-192	ENSRNOT00000067376	ENSRNOG00000008613	ENSRNOT00000067376			Gatad1			protein_coding
NA_peak_417	1	274663915	274663915	+	1658368	NA	Intergenic	Intergenic	-10956	ENSRNOT00000087310	ENSRNOG00000060473	ENSRNOT00000087310			AC098942.1			snoRNA
NA_peak_3502	7	141248983	141248983	+	1658368	NA	promoter-TSS (ENSRNOT00000084911)	protein_coding-promoter-TSS (ENSRNOT00000084911)	-61	ENSRNOT00000084911	ENSRNOG00000051970	ENSRNOT00000084911			Aqp5			protein_coding
NA_peak_1128	14	21144601	21144601	+	1658368	NA	Intergenic	Intergenic	11051	ENSRNOT00000004787	ENSRNOG00000003599	ENSRNOT00000004787			Utp3			protein_coding
NA_peak_1437	16	50082200	50082200	+	1658368	NA	intron (ENSRNOT00000034448, intron 1 of 13)	protein_coding-intron (ENSRNOT00000034448, intron 1 of 13)	-29106	ENSRNOT00000019302	ENSRNOG00000042426	ENSRNOT00000019302			Cyp4v3			protein_coding
NA_peak_758	11	34840616	34840616	+	1658368	NA	Intergenic	Intergenic	-24916	ENSRNOT00000050342	ENSRNOG00000001662	ENSRNOT00000050342			Dyrk1a			protein_coding
NA_peak_3474	7	134602123	134602123	+	1658368	NA	promoter-TSS (ENSRNOT00000055688)	protein_coding-promoter-TSS (ENSRNOT00000055688)	116	ENSRNOT00000006780	ENSRNOG00000004996	ENSRNOT00000006780			Zcrb1			protein_coding
NA_peak_2641	4	95884495	95884495	+	1658368	NA	promoter-TSS (ENSRNOT00000008585)	protein_coding-promoter-TSS (ENSRNOT00000008585)	-248	ENSRNOT00000008585	ENSRNOG00000006391	ENSRNOT00000008585			Smarcad1			protein_coding
NA_peak_1671	18	40732680	40732680	+	1658368	NA	promoter-TSS (ENSRNOT00000000170)	protein_coding-promoter-TSS (ENSRNOT00000000170)	200	ENSRNOT00000064116	ENSRNOG00000003829	ENSRNOT00000064116			Ap3s1			protein_coding
NA_peak_2234	3	3594147	3594147	+	1658368	NA	exon (ENSRNOT00000064861, exon 1 of 2)	protein_coding-exon (ENSRNOT00000064861, exon 1 of 2)	328	ENSRNOT00000064861	ENSRNOG00000042501	ENSRNOT00000064861			Tmem250			protein_coding
NA_peak_3007	5	161878924	161878924	+	1658368	NA	intron (ENSRNOT00000041175, intron 1 of 9)	protein_coding-intron (ENSRNOT00000041175, intron 1 of 9)	209	ENSRNOT00000041175	ENSRNOG00000033522	ENSRNOT00000041175			Prdm2			protein_coding
NA_peak_1902	2	44279377	44279377	+	1658368	NA	Intergenic	Intergenic	-7213	ENSRNOT00000083525	ENSRNOG00000059665	ENSRNOT00000083525			AABR07008118.1			lincRNA
NA_peak_169	1	142500263	142500263	+	1658368	NA	promoter-TSS (ENSRNOT00000089908)	lincRNA-promoter-TSS (ENSRNOT00000089908)	104	ENSRNOT00000015948	ENSRNOG00000011975	ENSRNOT00000089591			Crtc3			protein_coding
NA_peak_3200	6	123408572	123408572	+	1658368	NA	intron (ENSRNOT00000006604, intron 2 of 6)	protein_coding-intron (ENSRNOT00000006604, intron 2 of 6)	-3326	ENSRNOT00000083665	ENSRNOG00000004709	ENSRNOT00000006604			Foxn3			protein_coding
NA_peak_3326	7	36610798	36610798	+	1658368	NA	intron (ENSRNOT00000089874, intron 1 of 3)	protein_coding-intron (ENSRNOT00000089874, intron 1 of 3)	651	ENSRNOT00000089874	ENSRNOG00000058053	ENSRNOT00000089874			Ube2n			protein_coding
NA_peak_2191	20	32211074	32211074	+	1658368	NA	exon (ENSRNOT00000000444, exon 1 of 7)	protein_coding-exon (ENSRNOT00000000444, exon 1 of 7)	379	ENSRNOT00000000444	ENSRNOG00000000395	ENSRNOT00000000444			Kifbp			protein_coding
NA_peak_3840	9	82345842	82345842	+	1658368	NA	promoter-TSS (ENSRNOT00000024975)	protein_coding-promoter-TSS (ENSRNOT00000024975)	-20	ENSRNOT00000078260	ENSRNOG00000018586	ENSRNOT00000078260			Retreg2			protein_coding
NA_peak_2049	2	206273814	206273814	+	1658368	NA	intron (ENSRNOT00000056079, intron 1 of 15)	protein_coding-intron (ENSRNOT00000056079, intron 1 of 15)	265	ENSRNOT00000056079	ENSRNOG00000019333	ENSRNOT00000056079			Hipk1			protein_coding
NA_peak_1991	2	148891648	148891648	+	1658368	NA	exon (ENSRNOT00000018488, exon 1 of 2)	protein_coding-exon (ENSRNOT00000018488, exon 1 of 2)	252	ENSRNOT00000018488	ENSRNOG00000013703	ENSRNOT00000018488			Siah2			protein_coding
NA_peak_3006	5	161823330	161823330	+	1658368	NA	intron (ENSRNOT00000078237, intron 6 of 8)	protein_coding-intron (ENSRNOT00000041175, intron 6 of 9)	-48157	ENSRNOT00000088825	ENSRNOG00000061177	ENSRNOT00000088825			AABR07050344.1			snoRNA
NA_peak_1546	17	27496648	27496648	+	1658368	NA	intron (ENSRNOT00000089736, intron 1 of 10)	protein_coding-intron (ENSRNOT00000019040, intron 1 of 7)	176	ENSRNOT00000089736	ENSRNOG00000014165	ENSRNOT00000084090			Ssr1			protein_coding
NA_peak_3000	5	159994113	159994113	+	1658368	NA	intron (ENSRNOT00000014399, intron 1 of 15)	protein_coding-intron (ENSRNOT00000014399, intron 1 of 15)	314	ENSRNOT00000014399	ENSRNOG00000010436	ENSRNOT00000014399			Zbtb17			protein_coding
NA_peak_3670	8	104622291	104622291	+	1658368	NA	Intergenic	Intergenic	-28666	ENSRNOT00000016625	ENSRNOG00000012386	ENSRNOT00000016625			Zbtb38			protein_coding
NA_peak_2214	20	47494620	47494620	+	1658368	NA	exon (ENSRNOT00000036365, exon 1 of 20)	protein_coding-exon (ENSRNOT00000036365, exon 1 of 20)	196	ENSRNOT00000087718	ENSRNOG00000000314	ENSRNOT00000087718			Sec63			protein_coding
NA_peak_1798	19	41958847	41958847	+	1658368	NA	intron (ENSRNOT00000000279, intron 1 of 7)	protein_coding-intron (ENSRNOT00000000279, intron 1 of 7)	1236	ENSRNOT00000000279	ENSRNOG00000000262	ENSRNOT00000000279			Zfp821			protein_coding
NA_peak_3772	9	30335389	30335389	+	1658368	NA	Intergenic	Intergenic	12681	ENSRNOT00000075784	ENSRNOG00000049147	ENSRNOT00000075784			AABR07067099.1			miRNA
NA_peak_1914	2	58463233	58463233	+	1658368	NA	exon (ENSRNOT00000080618, exon 1 of 13)	protein_coding-exon (ENSRNOT00000080618, exon 1 of 13)	284	ENSRNOT00000080618	ENSRNOG00000054157	ENSRNOT00000083799			Nadk2			protein_coding
NA_peak_509	10	40208405	40208405	+	1658368	NA	intron (ENSRNOT00000000772, intron 1 of 2)	protein_coding-intron (ENSRNOT00000000772, intron 1 of 2)	182	ENSRNOT00000000772	ENSRNOG00000000622	ENSRNOT00000000772			Hint1			protein_coding
NA_peak_315	1	222242419	222242419	+	1658368	NA	TTS (ENSRNOT00000028731)	protein_coding-TTS (ENSRNOT00000028731)	225	ENSRNOT00000050891	ENSRNOG00000021156	ENSRNOT00000050891			Vegfb			protein_coding
NA_peak_3336	7	54213671	54213671	+	1658368	NA	intron (ENSRNOT00000005286, intron 1 of 14)	protein_coding-intron (ENSRNOT00000005286, intron 1 of 14)	352	ENSRNOT00000005286	ENSRNOG00000003890	ENSRNOT00000005286			Nap1l1			protein_coding
NA_peak_119	1	92119774	92119774	+	1658368	NA	intron (ENSRNOT00000092121, intron 1 of 6)	protein_coding-intron (ENSRNOT00000018153, intron 1 of 6)	177	ENSRNOT00000018153	ENSRNOG00000013565	ENSRNOT00000092121			Zfp507			protein_coding
NA_peak_2829	5	76039635	76039635	+	1653590	NA	intron (ENSRNOT00000019959, intron 1 of 49)	protein_coding-intron (ENSRNOT00000019959, intron 1 of 49)	125	ENSRNOT00000019959	ENSRNOG00000025076	ENSRNOT00000019959			Ecpas			protein_coding
NA_peak_2019	2	188757632	188757632	+	1647648	NA	TTS (ENSRNOT00000028038)	protein_coding-TTS (ENSRNOT00000028038)	143	ENSRNOT00000028052	ENSRNOG00000020663	ENSRNOT00000028052			Pygo2			protein_coding
NA_peak_3082	6	23472754	23472754	+	1647648	NA	intron (ENSRNOT00000035320, intron 1 of 18)	protein_coding-intron (ENSRNOT00000035320, intron 1 of 18)	415	ENSRNOT00000035320	ENSRNOG00000026316	ENSRNOT00000035320			Wdr43			protein_coding
NA_peak_1781	19	37600420	37600420	+	1647648	NA	intron (ENSRNOT00000023853, intron 1 of 11)	protein_coding-intron (ENSRNOT00000023853, intron 1 of 11)	272	ENSRNOT00000023853	ENSRNOG00000017674	ENSRNOT00000023853			Ctcf			protein_coding
NA_peak_2688	4	132137650	132137650	+	1647648	NA	promoter-TSS (ENSRNOT00000014455)	protein_coding-promoter-TSS (ENSRNOT00000014455)	-143	ENSRNOT00000014455	ENSRNOG00000010880	ENSRNOT00000014455			Gpr27			protein_coding
NA_peak_1355	15	93667152	93667152	+	1647648	NA	promoter-TSS (ENSRNOT00000093184)	protein_coding-promoter-TSS (ENSRNOT00000093184)	-36	ENSRNOT00000093184	ENSRNOG00000059334	ENSRNOT00000089876			Fbxl3			protein_coding
NA_peak_2961	5	151767923	151767923	+	1629128	NA	intron (ENSRNOT00000079380, intron 1 of 7)	protein_coding-intron (ENSRNOT00000079380, intron 1 of 7)	200	ENSRNOT00000079380	ENSRNOG00000051720	ENSRNOT00000079380			Nudc			protein_coding
NA_peak_2416	3	123580475	123580475	+	1618129	NA	intron (ENSRNOT00000047947, intron 2 of 5)	protein_coding-intron (ENSRNOT00000047947, intron 2 of 5)	1043	ENSRNOT00000047947	ENSRNOG00000021241	ENSRNOT00000047947			Gfra4			protein_coding
NA_peak_1489	17	5281923	5281923	+	1618129	NA	intron (ENSRNOT00000024781, intron 1 of 3)	protein_coding-intron (ENSRNOT00000024781, intron 1 of 3)	196	ENSRNOT00000024781	ENSRNOG00000018343	ENSRNOT00000024781			Isca1			protein_coding
NA_peak_1078	13	109996931	109996931	+	1618129	NA	exon (ENSRNOT00000005190, exon 1 of 4)	protein_coding-exon (ENSRNOT00000005190, exon 1 of 4)	161	ENSRNOT00000005190	ENSRNOG00000003833	ENSRNOT00000005190			Nenf			protein_coding
NA_peak_1167	14	72378813	72378813	+	1604592	NA	exon (ENSRNOT00000006727, exon 3 of 14)	protein_coding-exon (ENSRNOT00000006727, exon 3 of 14)	1517	ENSRNOT00000081878	ENSRNOG00000005043	ENSRNOT00000081878			Cpeb2			protein_coding
NA_peak_1433	16	48121370	48121370	+	1604592	NA	promoter-TSS (ENSRNOT00000090839)	protein_coding-promoter-TSS (ENSRNOT00000090839)	-60	ENSRNOT00000090839	ENSRNOG00000009590	ENSRNOT00000068562			Stox2			protein_coding
NA_peak_1680	18	52424072	52424072	+	1604592	NA	intron (ENSRNOT00000022017, intron 1 of 8)	protein_coding-intron (ENSRNOT00000022017, intron 1 of 8)	189	ENSRNOT00000022017	ENSRNOG00000016433	ENSRNOT00000022017			Prrc1			protein_coding
NA_peak_3374	7	74118778	74118778	+	1590167	NA	Intergenic	Intergenic	70964	ENSRNOT00000014879	ENSRNOG00000011136	ENSRNOT00000014879			Osr2			protein_coding
NA_peak_1723	18	80939520	80939520	+	1582872	NA	promoter-TSS (ENSRNOT00000021729)	protein_coding-promoter-TSS (ENSRNOT00000021729)	-355	ENSRNOT00000021729	ENSRNOG00000016239	ENSRNOT00000021729			Zadh2			protein_coding
NA_peak_1145	14	42519491	42519491	+	1582872	NA	intron (ENSRNOT00000065550, intron 1 of 17)	protein_coding-intron (ENSRNOT00000065550, intron 1 of 17)	529	ENSRNOT00000065550	ENSRNOG00000002246	ENSRNOT00000065550			Slc30a9			protein_coding
NA_peak_1589	17	77340183	77340183	+	1582872	NA	intron (ENSRNOT00000024697, intron 1 of 8)	protein_coding-intron (ENSRNOT00000024697, intron 1 of 8)	751	ENSRNOT00000024697	ENSRNOG00000018125	ENSRNOT00000024697			Sephs1			protein_coding
NA_peak_1875	2	23097113	23097113	+	1582872	NA	exon (ENSRNOT00000075286, exon 1 of 19)	protein_coding-exon (ENSRNOT00000075286, exon 1 of 19)	497	ENSRNOT00000075286	ENSRNOG00000050343	ENSRNOT00000075286			Jmy			protein_coding
NA_peak_461	10	14035180	14035180	+	1582872	NA	promoter-TSS (ENSRNOT00000065827)	protein_coding-promoter-TSS (ENSRNOT00000065827)	31	ENSRNOT00000065827	ENSRNOG00000012434	ENSRNOT00000065827			Zfp598			protein_coding
NA_peak_634	10	86657410	86657410	+	1582872	NA	exon (ENSRNOT00000087346, exon 1 of 9)	protein_coding-exon (ENSRNOT00000087346, exon 1 of 9)	125	ENSRNOT00000087346	ENSRNOG00000009066	ENSRNOT00000012340			Thra			protein_coding
NA_peak_1814	19	52033208	52033208	+	1582872	NA	exon (ENSRNOT00000019923, exon 1 of 5)	protein_coding-exon (ENSRNOT00000019923, exon 1 of 5)	322	ENSRNOT00000019923	ENSRNOG00000014522	ENSRNOT00000019923			Mlycd			protein_coding
NA_peak_3758	9	16580620	16580620	+	1571114	NA	exon (ENSRNOT00000022582, exon 1 of 17)	protein_coding-exon (ENSRNOT00000022582, exon 1 of 17)	458	ENSRNOT00000022582	ENSRNOG00000016655	ENSRNOT00000022582			Pex6			protein_coding
NA_peak_2753	5	5466830	5466830	+	1571114	NA	Intergenic	Intergenic	2507	ENSRNOT00000079766	ENSRNOG00000053278	ENSRNOT00000079766			AABR07046762.1			snoRNA
NA_peak_1775	19	31942186	31942186	+	1571114	NA	promoter-TSS (ENSRNOT00000024924)	protein_coding-promoter-TSS (ENSRNOT00000024924)	-6	ENSRNOT00000024924	ENSRNOG00000018477	ENSRNOT00000024924			Otud4			protein_coding
NA_peak_2921	5	142857048	142857048	+	1571114	NA	promoter-TSS (ENSRNOT00000038055)	protein_coding-promoter-TSS (ENSRNOT00000038055)	83	ENSRNOT00000038055	ENSRNOG00000025349	ENSRNOT00000038055			Maneal			protein_coding
NA_peak_649	10	90265088	90265088	+	1571114	NA	promoter-TSS (ENSRNOT00000048418)	protein_coding-promoter-TSS (ENSRNOT00000048418)	-71	ENSRNOT00000064283	ENSRNOG00000020937	ENSRNOT00000048418			Ubtf			protein_coding
NA_peak_3317	7	34002031	34002031	+	1571114	NA	intron (ENSRNOT00000005762, intron 1 of 16)	protein_coding-intron (ENSRNOT00000005762, intron 1 of 16)	525	ENSRNOT00000005762	ENSRNOG00000004148	ENSRNOT00000005762			Cdk17			protein_coding
NA_peak_825	11	83927217	83927217	+	1571114	NA	promoter-TSS (ENSRNOT00000040029)	protein_coding-promoter-TSS (ENSRNOT00000040029)	-693	ENSRNOT00000040029	ENSRNOG00000001738	ENSRNOT00000040029			Eif4g1			protein_coding
NA_peak_3582	8	56393045	56393045	+	1571114	NA	exon (ENSRNOT00000016263, exon 1 of 4)	protein_coding-exon (ENSRNOT00000016263, exon 1 of 4)	188	ENSRNOT00000016263	ENSRNOG00000012123	ENSRNOT00000016263			Fdx1			protein_coding
NA_peak_2029	2	195604263	195604263	+	1571114	NA	exon (ENSRNOT00000028263, exon 1 of 1)	protein_coding-exon (ENSRNOT00000028263, exon 1 of 1)	664	ENSRNOT00000028263	ENSRNOG00000020832	ENSRNOT00000028263			C2cd4d			protein_coding
NA_peak_960	12	47103584	47103584	+	1571114	NA	exon (ENSRNOT00000064910, exon 1 of 17)	protein_coding-exon (ENSRNOT00000064910, exon 1 of 17)	270	ENSRNOT00000064910	ENSRNOG00000001172	ENSRNOT00000064910			Rnf10			protein_coding
NA_peak_2345	3	63536267	63536267	+	1571114	NA	promoter-TSS (ENSRNOT00000015722)	protein_coding-promoter-TSS (ENSRNOT00000015722)	101	ENSRNOT00000016132	ENSRNOG00000011830	ENSRNOT00000016132			Plekha3			protein_coding
NA_peak_3483	7	137856008	137856008	+	1571114	NA	intron (ENSRNOT00000007003, intron 1 of 15)	protein_coding-intron (ENSRNOT00000007003, intron 1 of 15)	477	ENSRNOT00000007003	ENSRNOG00000005263	ENSRNOT00000007003			Scaf11			protein_coding
NA_peak_3277	7	12179342	12179342	+	1571114	NA	exon (ENSRNOT00000049170, exon 1 of 6)	protein_coding-exon (ENSRNOT00000049170, exon 1 of 6)	139	ENSRNOT00000049170	ENSRNOG00000028956	ENSRNOT00000049170			Mbd3			protein_coding
NA_peak_880	12	15890309	15890309	+	1571114	NA	promoter-TSS (ENSRNOT00000093029)	protein_coding-promoter-TSS (ENSRNOT00000093029)	96	ENSRNOT00000093029	ENSRNOG00000001235	ENSRNOT00000093029			Gna12			protein_coding
NA_peak_3476	7	135630728	135630728	+	1571114	NA	promoter-TSS (ENSRNOT00000047388)	protein_coding-promoter-TSS (ENSRNOT00000047388)	-74	ENSRNOT00000074793	ENSRNOG00000033397	ENSRNOT00000088223			Adamts20			protein_coding
NA_peak_793	11	70322765	70322765	+	1571114	NA	promoter-TSS (ENSRNOT00000002443)	protein_coding-promoter-TSS (ENSRNOT00000002443)	-75	ENSRNOT00000002443	ENSRNOG00000001793	ENSRNOT00000002443			Heg1			protein_coding
NA_peak_3807	9	60022457	60022457	+	1571114	NA	intron (ENSRNOT00000093748, intron 1 of 9)	protein_coding-intron (ENSRNOT00000093748, intron 1 of 9)	923	ENSRNOT00000093748	ENSRNOG00000011677	ENSRNOT00000093748			Slc39a10			protein_coding
NA_peak_3293	7	12949267	12949267	+	1571114	NA	exon (ENSRNOT00000010714, exon 1 of 13)	protein_coding-exon (ENSRNOT00000010714, exon 1 of 13)	315	ENSRNOT00000010714	ENSRNOG00000008030	ENSRNOT00000010714			Shc2			protein_coding
NA_peak_116	1	91296444	91296444	+	1571114	NA	intron (ENSRNOT00000028703, intron 1 of 1)	protein_coding-intron (ENSRNOT00000028703, intron 1 of 1)	212	ENSRNOT00000028703	ENSRNOG00000021144	ENSRNOT00000028703			Cebpg			protein_coding
NA_peak_536	10	48860791	48860791	+	1564847	NA	exon (ENSRNOT00000004127, exon 1 of 9)	protein_coding-exon (ENSRNOT00000004127, exon 1 of 9)	111	ENSRNOT00000004127	ENSRNOG00000003086	ENSRNOT00000004127			Cenpv			protein_coding
NA_peak_1958	2	120569932	120569932	+	1564847	NA	intron (ENSRNOT00000088442, intron 1 of 13)	protein_coding-intron (ENSRNOT00000088442, intron 1 of 13)	423	ENSRNOT00000088442	ENSRNOG00000051480	ENSRNOT00000088442			Fxr1			protein_coding
NA_peak_812	11	76429816	76429816	+	1564847	NA	Intergenic	Intergenic	-204659	ENSRNOT00000082937	ENSRNOG00000056641	ENSRNOT00000082937			AABR07034550.1			lincRNA
NA_peak_2451	3	150801408	150801408	+	1542883	NA	TTS (ENSRNOT00000081092)	snRNA-TTS (ENSRNOT00000081092)	119	ENSRNOT00000035060	ENSRNOG00000025443	ENSRNOT00000035060			Map1lc3a			protein_coding
NA_peak_1720	18	79543055	79543055	+	1542393	NA	intron (ENSRNOT00000022086, intron 1 of 30)	protein_coding-intron (ENSRNOT00000022086, intron 1 of 30)	164	ENSRNOT00000022086	ENSRNOG00000016303	ENSRNOT00000022086			Zfp236			protein_coding
NA_peak_3328	7	41114780	41114780	+	1542393	NA	promoter-TSS (ENSRNOT00000041354)	protein_coding-promoter-TSS (ENSRNOT00000041354)	83	ENSRNOT00000041354	ENSRNOG00000004026	ENSRNOT00000041354			Atp2b1			protein_coding
NA_peak_3915	X	11641559	11641559	+	1542393	NA	Intergenic	Intergenic	-7430	ENSRNOT00000041003	ENSRNOG00000034240	ENSRNOT00000041003			Bcor			protein_coding
NA_peak_522	10	46477019	46477019	+	1542393	NA	Intergenic	Intergenic	-13555	ENSRNOT00000084194	ENSRNOG00000055294	ENSRNOT00000084194			U1			snRNA
NA_peak_2215	20	47751301	47751301	+	1542393	NA	exon (ENSRNOT00000000348, exon 6 of 6)	protein_coding-exon (ENSRNOT00000000348, exon 6 of 6)	-17725	ENSRNOT00000091125	ENSRNOG00000060837	ENSRNOT00000091125			AC132752.2			pseudogene
NA_peak_2979	5	154363100	154363100	+	1542393	NA	TTS (ENSRNOT00000084603)	lincRNA-TTS (ENSRNOT00000084603)	229	ENSRNOT00000064596	ENSRNOG00000010902	ENSRNOT00000064596			Eloa			protein_coding
NA_peak_1861	2	2683157	2683157	+	1542393	NA	promoter-TSS (ENSRNOT00000016838)	protein_coding-promoter-TSS (ENSRNOT00000016838)	-41	ENSRNOT00000016838	ENSRNOG00000012414	ENSRNOT00000016838			Rhobtb3			protein_coding
NA_peak_1550	17	30714299	30714299	+	1542393	NA	intron (ENSRNOT00000081993, intron 1 of 15)	protein_coding-intron (ENSRNOT00000022902, intron 1 of 14)	111	ENSRNOT00000022902	ENSRNOG00000016705	ENSRNOT00000022902			Prpf4b			protein_coding
NA_peak_821	11	83048632	83048632	+	1542393	NA	promoter-TSS (ENSRNOT00000002408)	protein_coding-promoter-TSS (ENSRNOT00000002408)	-4	ENSRNOT00000002408	ENSRNOG00000001767	ENSRNOT00000002408			RGD1562339			protein_coding
NA_peak_2953	5	150609137	150609137	+	1542393	NA	intron (ENSRNOT00000074374, intron 1 of 10)	protein_coding-intron (ENSRNOT00000074374, intron 1 of 10)	215	ENSRNOT00000074374	ENSRNOG00000046922	ENSRNOT00000074374			Phactr4			protein_coding
NA_peak_817	11	82374080	82374080	+	1542393	NA	intron (ENSRNOT00000002429, intron 1 of 8)	protein_coding-intron (ENSRNOT00000002429, intron 1 of 8)	210	ENSRNOT00000002429	ENSRNOG00000001783	ENSRNOT00000002429			Tra2b			protein_coding
NA_peak_2544	4	7098618	7098618	+	1542146	NA	intron (ENSRNOT00000066598, intron 2 of 13)	protein_coding-intron (ENSRNOT00000066598, intron 2 of 13)	10217	ENSRNOT00000062099	ENSRNOG00000040346	ENSRNOT00000062099			Mir671			miRNA
NA_peak_3647	8	79323650	79323650	+	1540123	NA	intron (ENSRNOT00000090258, intron 1 of 29)	protein_coding-intron (ENSRNOT00000088391, intron 1 of 28)	165	ENSRNOT00000090258	ENSRNOG00000058898	ENSRNOT00000090258			Nedd4			protein_coding
NA_peak_2519	3	175644702	175644702	+	1534402	NA	TTS (ENSRNOT00000080191)	protein_coding-TTS (ENSRNOT00000080191)	286	ENSRNOT00000084452	ENSRNOG00000051420	ENSRNOT00000084452			Cables2			protein_coding
NA_peak_3865	9	98536487	98536487	+	1534402	NA	promoter-TSS (ENSRNOT00000027295)	protein_coding-promoter-TSS (ENSRNOT00000027295)	94	ENSRNOT00000027295	ENSRNOG00000020115	ENSRNOT00000027295			Ilkap			protein_coding
NA_peak_2297	3	29993397	29993397	+	1534402	NA	intron (ENSRNOT00000085801, intron 1 of 8)	protein_coding-intron (ENSRNOT00000080382, intron 2 of 9)	318	ENSRNOT00000085801	ENSRNOG00000004677	ENSRNOT00000080382			Zeb2			protein_coding
NA_peak_1261	15	12569571	12569571	+	1534402	NA	promoter-TSS (ENSRNOT00000010675)	protein_coding-promoter-TSS (ENSRNOT00000010675)	336	ENSRNOT00000083787	ENSRNOG00000007701	ENSRNOT00000010675			Thoc7			protein_coding
NA_peak_2830	5	76151169	76151169	+	1534402	NA	exon (ENSRNOT00000020702, exon 1 of 4)	protein_coding-exon (ENSRNOT00000020702, exon 1 of 4)	329	ENSRNOT00000020702	ENSRNOG00000015340	ENSRNOT00000020702			Dnajc25			protein_coding
NA_peak_2059	2	211078483	211078483	+	1534402	NA	exon (ENSRNOT00000049127, exon 1 of 20)	protein_coding-exon (ENSRNOT00000049127, exon 1 of 20)	149	ENSRNOT00000049127	ENSRNOG00000031814	ENSRNOT00000049127			Sort1			protein_coding
NA_peak_1239	14	110305967	110305967	+	1534402	NA	Intergenic	Intergenic	-71690	ENSRNOT00000082749	ENSRNOG00000055024	ENSRNOT00000082749			AABR07016674.1			lincRNA
NA_peak_1491	17	5498561	5498561	+	1534402	NA	Intergenic	Intergenic	-12824	ENSRNOT00000025381	ENSRNOG00000018651	ENSRNOT00000025381			Agtpbp1			protein_coding
NA_peak_2885	5	133786069	133786069	+	1534402	NA	intron (ENSRNOT00000081051, intron 1 of 6)	protein_coding-intron (ENSRNOT00000010318, intron 1 of 5)	334	ENSRNOT00000081051	ENSRNOG00000007775	ENSRNOT00000081051			Cmpk1			protein_coding
NA_peak_2970	5	152987061	152987061	+	1534402	NA	intron (ENSRNOT00000000163, intron 1 of 9)	protein_coding-intron (ENSRNOT00000000163, intron 1 of 9)	150	ENSRNOT00000000163	ENSRNOG00000000151	ENSRNOT00000000163			Ldlrap1			protein_coding
NA_peak_586	10	65448506	65448506	+	1534402	NA	promoter-TSS (ENSRNOT00000037016)	protein_coding-promoter-TSS (ENSRNOT00000037016)	-444	ENSRNOT00000082348	ENSRNOG00000023375	ENSRNOT00000037016			Rab34			protein_coding
NA_peak_1760	19	25028659	25028659	+	1534402	NA	promoter-TSS (ENSRNOT00000045699)	protein_coding-promoter-TSS (ENSRNOT00000045699)	-378	ENSRNOT00000045699	ENSRNOG00000029134	ENSRNOT00000045699			Adgrl1			protein_coding
NA_peak_2947	5	150079900	150079900	+	1534402	NA	promoter-TSS (ENSRNOT00000047917)	protein_coding-promoter-TSS (ENSRNOT00000047917)	-172	ENSRNOT00000047917	ENSRNOG00000032018	ENSRNOT00000047917			Tmem200b			protein_coding
NA_peak_1792	19	39257185	39257185	+	1534402	NA	promoter-TSS (ENSRNOT00000027653)	protein_coding-promoter-TSS (ENSRNOT00000027653)	266	ENSRNOT00000066312	ENSRNOG00000020379	ENSRNOT00000066312			Cog8			protein_coding
NA_peak_2217	20	48503520	48503520	+	1534402	NA	promoter-TSS (ENSRNOT00000064081)	protein_coding-promoter-TSS (ENSRNOT00000064081)	378	ENSRNOT00000073091	ENSRNOG00000047476	ENSRNOT00000073091			Wasf1			protein_coding
NA_peak_3576	8	50246030	50246030	+	1534402	NA	promoter-TSS (ENSRNOT00000035310)	protein_coding-promoter-TSS (ENSRNOT00000035310)	-192	ENSRNOT00000035310	ENSRNOG00000017871	ENSRNOT00000035310			Sidt2			protein_coding
NA_peak_2111	2	263864247	263864247	+	1534402	NA	promoter-TSS (ENSRNOT00000055259)	protein_coding-promoter-TSS (ENSRNOT00000055259)	-84	ENSRNOT00000055259	ENSRNOG00000009990	ENSRNOT00000055259			Zranb2			protein_coding
NA_peak_1208	14	85676799	85676799	+	1534402	NA	Intergenic	Intergenic	-76961	ENSRNOT00000014044	ENSRNOG00000010298	ENSRNOT00000014044			Xbp1			protein_coding
NA_peak_1168	14	73738106	73738106	+	1534402	NA	promoter-TSS (ENSRNOT00000070998)	protein_coding-promoter-TSS (ENSRNOT00000070998)	-31	ENSRNOT00000070998	ENSRNOG00000050437	ENSRNOT00000070998			Bod1l1			protein_coding
NA_peak_2708	4	151176052	151176052	+	1534402	NA	Intergenic	Intergenic	-73989	ENSRNOT00000009832	ENSRNOG00000007340	ENSRNOT00000009832			Dcp1b			protein_coding
NA_peak_3489	7	139684398	139684398	+	1534402	NA	Intergenic	Intergenic	-1175	ENSRNOT00000088376	ENSRNOG00000057988	ENSRNOT00000078579			Pfkm			protein_coding
NA_peak_1460	16	73410918	73410918	+	1534402	NA	promoter-TSS (ENSRNOT00000024128)	protein_coding-promoter-TSS (ENSRNOT00000024128)	-141	ENSRNOT00000024128	ENSRNOG00000017783	ENSRNOT00000024128			Sfrp1			protein_coding
NA_peak_59	1	50828925	50828925	+	1534402	NA	intron (ENSRNOT00000089149, intron 3 of 8)	protein_coding-intron (ENSRNOT00000023290, intron 2 of 7)	340	ENSRNOT00000023290	ENSRNOG00000048297	ENSRNOT00000086441			LOC108348175			protein_coding
NA_peak_3610	8	65413355	65413355	+	1534402	NA	Intergenic	Intergenic	-11080	ENSRNOT00000076238	ENSRNOG00000051285	ENSRNOT00000076238			AABR07070312.1			processed_transcript
NA_peak_612	10	81587524	81587524	+	1534402	NA	intron (ENSRNOT00000003582, intron 1 of 13)	protein_coding-intron (ENSRNOT00000003582, intron 1 of 13)	334	ENSRNOT00000003582	ENSRNOG00000002644	ENSRNOT00000003582			Utp18			protein_coding
NA_peak_894	12	22251424	22251424	+	1532911	NA	Intergenic	Intergenic	-6324	ENSRNOT00000001912	ENSRNOG00000001410	ENSRNOT00000001912			Gigyf1			protein_coding
NA_peak_755	11	34514281	34514281	+	1530900	NA	intron (ENSRNOT00000002291, intron 1 of 10)	protein_coding-intron (ENSRNOT00000002291, intron 1 of 10)	12650	ENSRNOT00000002291	ENSRNOG00000001686	ENSRNOT00000002291			Hlcs			protein_coding
NA_peak_311	1	221486174	221486174	+	1530900	NA	TTS (ENSRNOT00000028511)	protein_coding-TTS (ENSRNOT00000028511)	459	ENSRNOT00000028509	ENSRNOG00000021003	ENSRNOT00000028509			Sac3d1			protein_coding
NA_peak_244	1	197919092	197919092	+	1530900	NA	exon (ENSRNOT00000068529, exon 1 of 22)	protein_coding-exon (ENSRNOT00000068529, exon 1 of 22)	388	ENSRNOT00000068529	ENSRNOG00000018686	ENSRNOT00000068529			Atxn2l			protein_coding
NA_peak_583	10	65080280	65080280	+	1530900	NA	intron (ENSRNOT00000088919, intron 1 of 44)	protein_coding-intron (ENSRNOT00000088919, intron 1 of 44)	255	ENSRNOT00000088919	ENSRNOG00000033101	ENSRNOT00000043448			Myo18a			protein_coding
NA_peak_3640	8	76978108	76978108	+	1530900	NA	intron (ENSRNOT00000090268, intron 1 of 20)	protein_coding-intron (ENSRNOT00000090268, intron 1 of 20)	286	ENSRNOT00000090268	ENSRNOG00000054446	ENSRNOT00000090268			Sltm			protein_coding
NA_peak_3709	8	122004008	122004008	+	1530900	NA	promoter-TSS (ENSRNOT00000091980)	protein_coding-promoter-TSS (ENSRNOT00000091980)	92	ENSRNOT00000091980	ENSRNOG00000009161	ENSRNOT00000012545			Clasp2			protein_coding
NA_peak_2590	4	55526465	55526465	+	1530900	NA	intron (ENSRNOT00000010223, intron 1 of 5)	protein_coding-intron (ENSRNOT00000010223, intron 1 of 5)	627	ENSRNOT00000087407	ENSRNOG00000007662	ENSRNOT00000010223			Zfp800			protein_coding
NA_peak_2597	4	57625350	57625350	+	1530900	NA	promoter-TSS (ENSRNOT00000074649)	protein_coding-promoter-TSS (ENSRNOT00000074649)	-93	ENSRNOT00000078961	ENSRNOG00000048205	ENSRNOT00000078961			Ube2h			protein_coding
NA_peak_3042	5	172044943	172044943	+	1517419	NA	Intergenic	Intergenic	-1015	ENSRNOT00000084942	ENSRNOG00000053592	ENSRNOT00000084942			AABR07050646.1			pseudogene
NA_peak_2671	4	120817274	120817274	+	1517419	NA	exon (ENSRNOT00000021826, exon 1 of 8)	protein_coding-exon (ENSRNOT00000021826, exon 1 of 8)	103	ENSRNOT00000021826	ENSRNOG00000016255	ENSRNOT00000021826			Podxl2			protein_coding
NA_peak_491	10	35726678	35726678	+	1508509	NA	exon (ENSRNOT00000004323, exon 1 of 15)	protein_coding-exon (ENSRNOT00000004323, exon 1 of 15)	134	ENSRNOT00000004323	ENSRNOG00000003235	ENSRNOT00000004323			Mgat4b			protein_coding
NA_peak_2821	5	72103989	72103989	+	1508509	NA	exon (ENSRNOT00000021629, exon 1 of 10)	protein_coding-exon (ENSRNOT00000021629, exon 1 of 10)	285	ENSRNOT00000021629	ENSRNOG00000016137	ENSRNOT00000021629			Rad23b			protein_coding
NA_peak_2613	4	67206119	67206119	+	1508509	NA	exon (ENSRNOT00000013124, exon 1 of 8)	protein_coding-exon (ENSRNOT00000013124, exon 1 of 8)	307	ENSRNOT00000013124	ENSRNOG00000009280	ENSRNOT00000013124			Mkrn1			protein_coding
NA_peak_875	12	13808112	13808112	+	1508509	NA	Intergenic	Intergenic	-2068	ENSRNOT00000084865	ENSRNOG00000024482	ENSRNOT00000038203			Tnrc18			protein_coding
NA_peak_3551	8	32422877	32422877	+	1508509	NA	Intergenic	Intergenic	9110	ENSRNOT00000048460	ENSRNOG00000028869	ENSRNOT00000048460			AABR07069585.1			protein_coding
NA_peak_2246	3	7032295	7032295	+	1508509	NA	intron (ENSRNOT00000087557, intron 1 of 1)	lincRNA-intron (ENSRNOT00000087557, intron 1 of 1)	308	ENSRNOT00000087557	ENSRNOG00000057465	ENSRNOT00000087557			AABR07051376.2			lincRNA
NA_peak_3436	7	121029629	121029629	+	1508509	NA	exon (ENSRNOT00000004703, exon 1 of 5)	protein_coding-exon (ENSRNOT00000004703, exon 1 of 5)	125	ENSRNOT00000004703	ENSRNOG00000016156	ENSRNOT00000004703			Nptxr			protein_coding
NA_peak_651	10	90384155	90384155	+	1508509	NA	TTS (ENSRNOT00000028557)	protein_coding-TTS (ENSRNOT00000028557)	7052	ENSRNOT00000040472	ENSRNOG00000021031	ENSRNOT00000028557			Grn			protein_coding
NA_peak_3081	6	23202911	23202911	+	1508509	NA	exon (ENSRNOT00000011630, exon 28 of 28)	protein_coding-exon (ENSRNOT00000011630, exon 28 of 28)	88657	ENSRNOT00000085708	ENSRNOG00000008806	ENSRNOT00000085708			Clip4			protein_coding
NA_peak_490	10	35716138	35716138	+	1508509	NA	exon (ENSRNOT00000004308, exon 1 of 5)	protein_coding-exon (ENSRNOT00000004308, exon 1 of 5)	122	ENSRNOT00000004308	ENSRNOG00000003147	ENSRNOT00000059255			Sqstm1			protein_coding
NA_peak_2474	3	159305617	159305617	+	1508509	NA	intron (ENSRNOT00000008427, intron 1 of 5)	protein_coding-intron (ENSRNOT00000008427, intron 1 of 5)	272	ENSRNOT00000008427	ENSRNOG00000006380	ENSRNOT00000008427			Srsf6			protein_coding
NA_peak_3105	6	44366639	44366639	+	1508509	NA	Intergenic	Intergenic	-2724	ENSRNOT00000085925	ENSRNOG00000007237	ENSRNOT00000009491			Id2			protein_coding
NA_peak_554	10	57185555	57185555	+	1508509	NA	exon (ENSRNOT00000040488, exon 1 of 33)	protein_coding-exon (ENSRNOT00000040488, exon 1 of 33)	154	ENSRNOT00000086374	ENSRNOG00000033508	ENSRNOT00000089853			Mink1			protein_coding
NA_peak_3750	9	15262802	15262802	+	1508509	NA	Intergenic	Intergenic	12115	ENSRNOT00000019650	ENSRNOG00000014492	ENSRNOT00000019650			Pgc			protein_coding
NA_peak_3681	8	111326483	111326483	+	1508509	NA	promoter-TSS (ENSRNOT00000067203)	protein_coding-promoter-TSS (ENSRNOT00000067203)	50	ENSRNOT00000067203	ENSRNOG00000008593	ENSRNOT00000067203			Ryk			protein_coding
NA_peak_1777	19	32770828	32770828	+	1508509	NA	intron (ENSRNOT00000071471, intron 1 of 4)	protein_coding-intron (ENSRNOT00000071471, intron 1 of 4)	173	ENSRNOT00000071471	ENSRNOG00000049370	ENSRNOT00000071471			Lsm6			protein_coding
NA_peak_1474	16	83132783	83132783	+	1508509	NA	promoter-TSS (ENSRNOT00000043449)	protein_coding-promoter-TSS (ENSRNOT00000043449)	2	ENSRNOT00000043449	ENSRNOG00000012934	ENSRNOT00000017947			Arhgef7			protein_coding
NA_peak_1475	16	83206032	83206032	+	1508509	NA	promoter-TSS (ENSRNOT00000018870)	protein_coding-promoter-TSS (ENSRNOT00000018870)	28	ENSRNOT00000018870	ENSRNOG00000013618	ENSRNOT00000018870			Ankrd10			protein_coding
NA_peak_742	11	30363585	30363585	+	1508509	NA	intron (ENSRNOT00000002885, intron 1 of 4)	protein_coding-intron (ENSRNOT00000002885, intron 1 of 4)	305	ENSRNOT00000002885	ENSRNOG00000002115	ENSRNOT00000002885			Sod1			protein_coding
NA_peak_1209	14	85772642	85772642	+	1508509	NA	exon (ENSRNOT00000015627, exon 1 of 5)	protein_coding-exon (ENSRNOT00000015627, exon 1 of 5)	120	ENSRNOT00000015627	ENSRNOG00000010706	ENSRNOT00000015627			Ccdc117			protein_coding
NA_peak_3617	8	68282490	68282490	+	1508509	NA	promoter-TSS (ENSRNOT00000010991)	protein_coding-promoter-TSS (ENSRNOT00000010991)	100	ENSRNOT00000010991	ENSRNOG00000007926	ENSRNOT00000010991			Map2k5			protein_coding
NA_peak_432	10	4249663	4249663	+	1508509	NA	promoter-TSS (ENSRNOT00000003150)	protein_coding-promoter-TSS (ENSRNOT00000003150)	76	ENSRNOT00000003150	ENSRNOG00000002294	ENSRNOT00000003150			Snx29			protein_coding
NA_peak_138	1	107232054	107232054	+	1508509	NA	exon (ENSRNOT00000032922, exon 1 of 1)	protein_coding-exon (ENSRNOT00000032922, exon 1 of 1)	251	ENSRNOT00000032922	ENSRNOG00000023968	ENSRNOT00000032922			Fancf			protein_coding
NA_peak_1543	17	24653814	24653814	+	1508509	NA	Intergenic	Intergenic	-1088	ENSRNOT00000041960	ENSRNOG00000015522	ENSRNOT00000041960			Tfap2a			protein_coding
NA_peak_448	10	11901710	11901710	+	1508509	NA	promoter-TSS (ENSRNOT00000009936)	protein_coding-promoter-TSS (ENSRNOT00000009936)	55	ENSRNOT00000009936	ENSRNOG00000007280	ENSRNOT00000009936			Naa60			protein_coding
NA_peak_3061	6	3444271	3444271	+	1508509	NA	intron (ENSRNOT00000010366, intron 1 of 32)	protein_coding-intron (ENSRNOT00000010366, intron 1 of 32)	248	ENSRNOT00000010366	ENSRNOG00000007172	ENSRNOT00000010366			Map4k3			protein_coding
NA_peak_294	1	219640344	219640344	+	1508509	NA	promoter-TSS (ENSRNOT00000054850)	protein_coding-promoter-TSS (ENSRNOT00000054850)	-50	ENSRNOT00000054850	ENSRNOG00000019145	ENSRNOT00000054850			Kdm2a			protein_coding
NA_peak_3776	9	38296746	38296746	+	1508509	NA	promoter-TSS (ENSRNOT00000078157)	protein_coding-promoter-TSS (ENSRNOT00000078157)	-576	ENSRNOT00000078157	ENSRNOG00000052376	ENSRNOT00000088824			Bend6			protein_coding
NA_peak_1793	19	39300733	39300733	+	1508509	NA	promoter-TSS (ENSRNOT00000085134)	miRNA-promoter-TSS (ENSRNOT00000085134)	-145	ENSRNOT00000085134	ENSRNOG00000060258	ENSRNOT00000085134			AC124839.1			miRNA
NA_peak_447	10	11594998	11594998	+	1508509	NA	promoter-TSS (ENSRNOT00000007079)	protein_coding-promoter-TSS (ENSRNOT00000007079)	-46	ENSRNOT00000007079	ENSRNOG00000005330	ENSRNOT00000007079			Crebbp			protein_coding
NA_peak_1186	14	81725456	81725456	+	1508509	NA	promoter-TSS (ENSRNOT00000020154)	protein_coding-promoter-TSS (ENSRNOT00000020154)	-57	ENSRNOT00000020154	ENSRNOG00000014874	ENSRNOT00000020154			Zfyve28			protein_coding
NA_peak_3072	6	11644922	11644922	+	1508509	NA	exon (ENSRNOT00000021923, exon 1 of 10)	protein_coding-exon (ENSRNOT00000021923, exon 1 of 10)	294	ENSRNOT00000093689	ENSRNOG00000016134	ENSRNOT00000021923			Msh6			protein_coding
NA_peak_965	12	47360505	47360505	+	1508509	NA	promoter-TSS (ENSRNOT00000001562)	protein_coding-promoter-TSS (ENSRNOT00000001562)	2	ENSRNOT00000001562	ENSRNOG00000001178	ENSRNOT00000001562			Sppl3			protein_coding
NA_peak_1634	18	24397110	24397110	+	1508509	NA	promoter-TSS (ENSRNOT00000022761)	protein_coding-promoter-TSS (ENSRNOT00000022761)	-259	ENSRNOT00000022761	ENSRNOG00000016773	ENSRNOT00000022761			Sap130			protein_coding
NA_peak_2012	2	186872577	186872577	+	1508509	NA	promoter-TSS (ENSRNOT00000021577)	protein_coding-promoter-TSS (ENSRNOT00000021577)	5	ENSRNOT00000093312	ENSRNOG00000043095	ENSRNOT00000021577			Etv3			protein_coding
NA_peak_622	10	85222583	85222583	+	1508509	NA	exon (ENSRNOT00000031045, exon 1 of 23)	protein_coding-exon (ENSRNOT00000031045, exon 1 of 23)	278	ENSRNOT00000031045	ENSRNOG00000023095	ENSRNOT00000031045			Npepps			protein_coding
NA_peak_1915	2	60446500	60446500	+	1508509	NA	promoter-TSS (ENSRNOT00000024218)	protein_coding-promoter-TSS (ENSRNOT00000024218)	10	ENSRNOT00000024218	ENSRNOG00000017876	ENSRNOT00000024218			Dnajc21			protein_coding
NA_peak_1133	14	33151971	33151971	+	1508509	NA	intron (ENSRNOT00000002844, intron 1 of 3)	protein_coding-intron (ENSRNOT00000002844, intron 1 of 3)	-1462	ENSRNOT00000002837	ENSRNOG00000002074	ENSRNOT00000002837			Rest			protein_coding
NA_peak_749	11	31694396	31694396	+	1508509	NA	promoter-TSS (ENSRNOT00000002779)	protein_coding-promoter-TSS (ENSRNOT00000002779)	57	ENSRNOT00000002779	ENSRNOG00000002032	ENSRNOT00000002779			Ifngr2			protein_coding
NA_peak_656	10	91217275	91217275	+	1508509	NA	intron (ENSRNOT00000004218, intron 1 of 4)	protein_coding-intron (ENSRNOT00000004218, intron 1 of 4)	196	ENSRNOT00000004218	ENSRNOG00000021287	ENSRNOT00000004218			Hexim2			protein_coding
NA_peak_783	11	64421024	64421024	+	1508509	NA	exon (ENSRNOT00000066997, exon 1 of 7)	protein_coding-exon (ENSRNOT00000066997, exon 1 of 7)	224	ENSRNOT00000066997	ENSRNOG00000001525	ENSRNOT00000066997			Igsf11			protein_coding
NA_peak_1778	19	33081686	33081686	+	1508509	NA	promoter-TSS (ENSRNOT00000015985)	protein_coding-promoter-TSS (ENSRNOT00000015985)	-688	ENSRNOT00000015985	ENSRNOG00000011991	ENSRNOT00000015985			Slc10a7			protein_coding
NA_peak_3383	7	78930732	78930732	+	1508509	NA	promoter-TSS (ENSRNOT00000005668)	protein_coding-promoter-TSS (ENSRNOT00000005668)	100	ENSRNOT00000005668	ENSRNOG00000004152	ENSRNOT00000005668			Lrp12			protein_coding
NA_peak_3234	6	137238455	137238455	+	1508509	NA	Intergenic	Intergenic	-2197	ENSRNOT00000031164	ENSRNOG00000028629	ENSRNOT00000031164			Akt1			protein_coding
NA_peak_2786	5	48436246	48436246	+	1508509	NA	exon (ENSRNOT00000060914, exon 1 of 7)	protein_coding-exon (ENSRNOT00000060914, exon 1 of 7)	285	ENSRNOT00000060914	ENSRNOG00000007755	ENSRNOT00000060914			Pm20d2			protein_coding
NA_peak_1185	14	81426381	81426381	+	1508509	NA	promoter-TSS (ENSRNOT00000090025)	miRNA-promoter-TSS (ENSRNOT00000090025)	115	ENSRNOT00000018073	ENSRNOG00000013039	ENSRNOT00000018073			Add1			protein_coding
NA_peak_2291	3	15311490	15311490	+	1508509	NA	Intergenic	Intergenic	-32845	ENSRNOT00000032204	ENSRNOG00000019339	ENSRNOT00000032204			AABR07051518.1			protein_coding
NA_peak_1732	19	10100947	10100947	+	1508509	NA	exon (ENSRNOT00000017629, exon 1 of 10)	protein_coding-exon (ENSRNOT00000017629, exon 1 of 10)	504	ENSRNOT00000017629	ENSRNOG00000012622	ENSRNOT00000017629			Mmp15			protein_coding
NA_peak_2648	4	99618634	99618634	+	1508509	NA	promoter-TSS (ENSRNOT00000064772)	protein_coding-promoter-TSS (ENSRNOT00000064772)	12	ENSRNOT00000064772	ENSRNOG00000008481	ENSRNOT00000064772			Reep1			protein_coding
NA_peak_1951	2	113415043	113415043	+	1508509	NA	Intergenic	Intergenic	-69466	ENSRNOT00000034096	ENSRNOG00000024089	ENSRNOT00000034096			Fndc3b			protein_coding
NA_peak_1844	19	57421834	57421834	+	1508509	NA	exon (ENSRNOT00000025512, exon 1 of 4)	protein_coding-exon (ENSRNOT00000025512, exon 1 of 4)	259	ENSRNOT00000025512	ENSRNOG00000018836	ENSRNOT00000025512			RGD1559896			protein_coding
NA_peak_3342	7	60294608	60294608	+	1508509	NA	exon (ENSRNOT00000007580, exon 1 of 7)	protein_coding-exon (ENSRNOT00000007580, exon 1 of 7)	188	ENSRNOT00000007580	ENSRNOG00000005689	ENSRNOT00000007580			Yeats4			protein_coding
NA_peak_701	10	106655080	106655080	+	1489594	NA	Intergenic	Intergenic	-57047	ENSRNOT00000040629	ENSRNOG00000022395	ENSRNOT00000040629			Tnrc6c			protein_coding
NA_peak_172	1	143402259	143402259	+	1489594	NA	exon (ENSRNOT00000064667, exon 1 of 10)	protein_coding-exon (ENSRNOT00000064667, exon 1 of 10)	273	ENSRNOT00000064667	ENSRNOG00000028113	ENSRNOT00000064667			Whamm			protein_coding
NA_peak_1241	14	114127527	114127527	+	1489594	NA	exon (ENSRNOT00000006443, exon 1 of 9)	protein_coding-exon (ENSRNOT00000006443, exon 1 of 9)	502	ENSRNOT00000006957	ENSRNOG00000004621	ENSRNOT00000006443			Rtn4			protein_coding
NA_peak_71	1	72340607	72340607	+	1483622	NA	Intergenic	Intergenic	-1212	ENSRNOT00000021772	ENSRNOG00000016274	ENSRNOT00000021772			Zfp580			protein_coding
NA_peak_2371	3	83335823	83335823	+	1483622	NA	intron (ENSRNOT00000013914, intron 1 of 13)	protein_coding-intron (ENSRNOT00000013914, intron 1 of 13)	137	ENSRNOT00000013914	ENSRNOG00000009689	ENSRNOT00000013914			Api5			protein_coding
NA_peak_2664	4	118328783	118328783	+	1483622	NA	promoter-TSS (ENSRNOT00000023806)	pseudogene-promoter-TSS (ENSRNOT00000023806)	-55	ENSRNOT00000090348	ENSRNOG00000059100	ENSRNOT00000090348			AABR07073038.2			lincRNA
NA_peak_3101	6	33786355	33786355	+	1483622	NA	promoter-TSS (ENSRNOT00000008359)	protein_coding-promoter-TSS (ENSRNOT00000008359)	158	ENSRNOT00000082598	ENSRNOG00000006180	ENSRNOT00000082598			Pum2			protein_coding
NA_peak_835	11	86852836	86852836	+	1483622	NA	exon (ENSRNOT00000002581, exon 1 of 15)	protein_coding-exon (ENSRNOT00000002581, exon 1 of 15)	125	ENSRNOT00000002581	ENSRNOG00000001886	ENSRNOT00000002581			Dgcr8			protein_coding
NA_peak_439	10	10573488	10573488	+	1474785	NA	exon (ENSRNOT00000003888, exon 2 of 10)	protein_coding-exon (ENSRNOT00000003888, exon 2 of 10)	297	ENSRNOT00000003888	ENSRNOG00000002895	ENSRNOT00000003888			Nagpa			protein_coding
NA_peak_1052	13	96180994	96180994	+	1460000	NA	Intergenic	Intergenic	-14842	ENSRNOT00000042547	ENSRNOG00000031864	ENSRNOT00000042547			AABR07021871.1			protein_coding
NA_peak_1843	19	57192373	57192373	+	1456260	NA	promoter-TSS (ENSRNOT00000058080)	protein_coding-promoter-TSS (ENSRNOT00000058080)	-278	ENSRNOT00000058080	ENSRNOG00000026791	ENSRNOT00000058080			Pgbd5			protein_coding
NA_peak_1708	18	71369644	71369644	+	1456260	NA	Intergenic	Intergenic	-26186	ENSRNOT00000024831	ENSRNOG00000018359	ENSRNOT00000024831			Smad7			protein_coding
NA_peak_1101	14	6645142	6645142	+	1444276	NA	exon (ENSRNOT00000002916, exon 1 of 15)	protein_coding-exon (ENSRNOT00000002916, exon 1 of 15)	115	ENSRNOT00000002916	ENSRNOG00000002146	ENSRNOT00000002916			Pkd2			protein_coding
NA_peak_3805	9	54212768	54212768	+	1444276	NA	promoter-TSS (ENSRNOT00000078073)	protein_coding-promoter-TSS (ENSRNOT00000078073)	1	ENSRNOT00000090026	ENSRNOG00000056246	ENSRNOT00000078073			Gls			protein_coding
NA_peak_3567	8	48805806	48805806	+	1444276	NA	exon (ENSRNOT00000064041, exon 1 of 11)	protein_coding-exon (ENSRNOT00000064041, exon 1 of 11)	122	ENSRNOT00000064041	ENSRNOG00000012420	ENSRNOT00000064041			Bcl9l			protein_coding
NA_peak_3545	8	26311621	26311621	+	1444276	NA	promoter-TSS (ENSRNOT00000046432)	protein_coding-promoter-TSS (ENSRNOT00000046432)	-271	ENSRNOT00000046432	ENSRNOG00000029995	ENSRNOT00000046432			Herpud2			protein_coding
NA_peak_381	1	257517563	257517563	+	1444276	NA	exon (ENSRNOT00000018668, exon 1 of 11)	protein_coding-exon (ENSRNOT00000018668, exon 1 of 11)	321	ENSRNOT00000073502	ENSRNOG00000036598	ENSRNOT00000078738			Tbc1d12			protein_coding
NA_peak_2872	5	127404469	127404469	+	1444276	NA	promoter-TSS (ENSRNOT00000017575)	protein_coding-promoter-TSS (ENSRNOT00000017575)	19	ENSRNOT00000017575	ENSRNOG00000013064	ENSRNOT00000017575			Lrp8			protein_coding
NA_peak_2699	4	147592586	147592586	+	1444276	NA	exon (ENSRNOT00000013831, exon 1 of 17)	protein_coding-exon (ENSRNOT00000013831, exon 1 of 17)	113	ENSRNOT00000013831	ENSRNOG00000010153	ENSRNOT00000013831			Raf1			protein_coding
NA_peak_1259	15	11912518	11912518	+	1444276	NA	promoter-TSS (ENSRNOT00000090127)	lincRNA-promoter-TSS (ENSRNOT00000090127)	288	ENSRNOT00000068171	ENSRNOG00000005957	ENSRNOT00000008759			Slc4a7			protein_coding
NA_peak_3220	6	132339730	132339730	+	1444276	NA	Intergenic	Intergenic	-43607	ENSRNOT00000071733	ENSRNOG00000043143	ENSRNOT00000071863			Eml1			protein_coding
NA_peak_1472	16	82100109	82100109	+	1444276	NA	promoter-TSS (ENSRNOT00000089447)	protein_coding-promoter-TSS (ENSRNOT00000089447)	113	ENSRNOT00000023163	ENSRNOG00000017154	ENSRNOT00000023163			Atp11a			protein_coding
NA_peak_2459	3	152933958	152933958	+	1444276	NA	exon (ENSRNOT00000027539, exon 1 of 4)	protein_coding-exon (ENSRNOT00000027539, exon 1 of 4)	187	ENSRNOT00000027539	ENSRNOG00000020317	ENSRNOT00000027539			Rab5if			protein_coding
NA_peak_3431	7	120675370	120675370	+	1444276	NA	Intergenic	Intergenic	-3011	ENSRNOT00000088424	ENSRNOG00000013076	ENSRNOT00000018126			Csnk1e			protein_coding
NA_peak_2790	5	57028690	57028690	+	1444276	NA	promoter-TSS (ENSRNOT00000053719)	miRNA-promoter-TSS (ENSRNOT00000053719)	-169	ENSRNOT00000053719	ENSRNOG00000035596	ENSRNOT00000053719			Mir207			miRNA
NA_peak_2094	2	244058013	244058013	+	1444276	NA	promoter-TSS (ENSRNOT00000021381)	protein_coding-promoter-TSS (ENSRNOT00000021381)	-173	ENSRNOT00000021381	ENSRNOG00000015913	ENSRNOT00000021381			Tspan5			protein_coding
NA_peak_542	10	55675649	55675649	+	1444276	NA	promoter-TSS (ENSRNOT00000057295)	protein_coding-promoter-TSS (ENSRNOT00000057295)	74	ENSRNOT00000057295	ENSRNOG00000006989	ENSRNOT00000057295			Vamp2			protein_coding
NA_peak_996	13	49170071	49170071	+	1444276	NA	promoter-TSS (ENSRNOT00000000036)	protein_coding-promoter-TSS (ENSRNOT00000000036)	-153	ENSRNOT00000000036	ENSRNOG00000000033	ENSRNOT00000000036			Tmcc2			protein_coding
NA_peak_3017	5	166133263	166133263	+	1444276	NA	promoter-TSS (ENSRNOT00000078830)	protein_coding-promoter-TSS (ENSRNOT00000078830)	11	ENSRNOT00000078830	ENSRNOG00000057626	ENSRNOT00000086226			Kif1b			protein_coding
NA_peak_3604	8	62724075	62724075	+	1444276	NA	intron (ENSRNOT00000010620, intron 1 of 13)	protein_coding-intron (ENSRNOT00000010620, intron 1 of 13)	287	ENSRNOT00000010620	ENSRNOG00000007687	ENSRNOT00000010620			Sema7a			protein_coding
NA_peak_578	10	64202206	64202206	+	1444276	NA	exon (ENSRNOT00000008982, exon 1 of 3)	protein_coding-exon (ENSRNOT00000008982, exon 1 of 3)	174	ENSRNOT00000008982	ENSRNOG00000006674	ENSRNOT00000008982			Rflnb			protein_coding
NA_peak_2330	3	58443341	58443341	+	1444276	NA	exon (ENSRNOT00000002075, exon 1 of 26)	protein_coding-exon (ENSRNOT00000002075, exon 1 of 26)	240	ENSRNOT00000002075	ENSRNOG00000001518	ENSRNOT00000002075			Itga6			protein_coding
NA_peak_2057	2	209766703	209766703	+	1432116	NA	exon (ENSRNOT00000092240, exon 1 of 1)	protein_coding-exon (ENSRNOT00000092240, exon 1 of 1)	191	ENSRNOT00000092240	ENSRNOG00000062002	ENSRNOT00000092240			Kcna3			protein_coding
NA_peak_1908	2	52531309	52531309	+	1432116	NA	promoter-TSS (ENSRNOT00000021608)	protein_coding-promoter-TSS (ENSRNOT00000021608)	-224	ENSRNOT00000021608	ENSRNOG00000015925	ENSRNOT00000089303			Zfp131			protein_coding
NA_peak_3859	9	94425516	94425516	+	1432116	NA	intron (ENSRNOT00000076099, intron 1 of 18)	protein_coding-intron (ENSRNOT00000064965, intron 1 of 8)	260	ENSRNOT00000076099	ENSRNOG00000023577	ENSRNOT00000076099			Gigyf2			protein_coding
NA_peak_3334	7	53714708	53714708	+	1432116	NA	intron (ENSRNOT00000005078, intron 1 of 16)	protein_coding-intron (ENSRNOT00000005078, intron 1 of 16)	171	ENSRNOT00000005078	ENSRNOG00000003803	ENSRNOT00000005078			Zdhhc17			protein_coding
NA_peak_943	12	40510360	40510360	+	1432116	NA	promoter-TSS (ENSRNOT00000001817)	protein_coding-promoter-TSS (ENSRNOT00000001817)	-18	ENSRNOT00000001817	ENSRNOG00000001345	ENSRNOT00000065314			Mapkapk5			protein_coding
NA_peak_1923	2	77586793	77586793	+	1432116	NA	exon (ENSRNOT00000073915, exon 3 of 3)	protein_coding-exon (ENSRNOT00000073915, exon 3 of 3)	45835	ENSRNOT00000073915	ENSRNOG00000046313	ENSRNOT00000073915			Basp1			protein_coding
NA_peak_3694	8	117038797	117038797	+	1432116	NA	Intergenic	Intergenic	-24087	ENSRNOT00000082452	ENSRNOG00000049083	ENSRNOT00000082452			Nicn1			protein_coding
NA_peak_3382	7	78091553	78091553	+	1432116	NA	promoter-TSS (ENSRNOT00000050753)	protein_coding-promoter-TSS (ENSRNOT00000050753)	-484	ENSRNOT00000050753	ENSRNOG00000004201	ENSRNOT00000006393			Rims2			protein_coding
NA_peak_2785	5	48274545	48274545	+	1432116	NA	promoter-TSS (ENSRNOT00000041271)	protein_coding-promoter-TSS (ENSRNOT00000041271)	60	ENSRNOT00000041271	ENSRNOG00000007434	ENSRNOT00000075992			Ube2j1			protein_coding
NA_peak_2377	3	94419155	94419155	+	1431450	NA	promoter-TSS (ENSRNOT00000015775)	protein_coding-promoter-TSS (ENSRNOT00000015775)	-107	ENSRNOT00000015775	ENSRNOG00000011358	ENSRNOT00000089554			Hipk3			protein_coding
NA_peak_915	12	31323514	31323514	+	1431450	NA	intron (ENSRNOT00000001247, intron 1 of 6)	protein_coding-intron (ENSRNOT00000001247, intron 1 of 6)	296	ENSRNOT00000001247	ENSRNOG00000000938	ENSRNOT00000001247			Ran			protein_coding
NA_peak_940	12	40244273	40244273	+	1431450	NA	exon (ENSRNOT00000030583, exon 1 of 8)	protein_coding-exon (ENSRNOT00000030583, exon 1 of 8)	192	ENSRNOT00000030583	ENSRNOG00000028198	ENSRNOT00000030583			Sh2b3			protein_coding
NA_peak_1000	13	51240656	51240656	+	1431450	NA	promoter-TSS (ENSRNOT00000005551)	protein_coding-promoter-TSS (ENSRNOT00000005551)	-255	ENSRNOT00000005551	ENSRNOG00000004143	ENSRNOT00000005551			Adipor1			protein_coding
NA_peak_1601	17	85141147	85141147	+	1418051	NA	promoter-TSS (ENSRNOT00000000162)	protein_coding-promoter-TSS (ENSRNOT00000000162)	63	ENSRNOT00000000162	ENSRNOG00000000150	ENSRNOT00000000162			Dnajc1			protein_coding
NA_peak_384	1	260732711	260732711	+	1418051	NA	intron (ENSRNOT00000076842, intron 1 of 7)	protein_coding-intron (ENSRNOT00000076073, intron 1 of 8)	209	ENSRNOT00000076073	ENSRNOG00000042679	ENSRNOT00000036791			Lcor			protein_coding
NA_peak_52	1	47942929	47942929	+	1418051	NA	intron (ENSRNOT00000079312, intron 1 of 5)	protein_coding-intron (ENSRNOT00000025936, intron 1 of 7)	129	ENSRNOT00000079312	ENSRNOG00000019091	ENSRNOT00000079312			Wtap			protein_coding
NA_peak_1627	18	14304913	14304913	+	1418051	NA	Intergenic	Intergenic	-166300	ENSRNOT00000045224	ENSRNOG00000016671	ENSRNOT00000045224			Dtna			protein_coding
NA_peak_1593	17	80320453	80320453	+	1418051	NA	exon (ENSRNOT00000023637, exon 1 of 2)	protein_coding-exon (ENSRNOT00000023637, exon 1 of 2)	228	ENSRNOT00000023637	ENSRNOG00000017459	ENSRNOT00000023637			C1ql3			protein_coding
NA_peak_2826	5	74366678	74366678	+	1418051	NA	intron (ENSRNOT00000076106, intron 1 of 24)	protein_coding-intron (ENSRNOT00000059627, intron 1 of 25)	139	ENSRNOT00000076705	ENSRNOG00000011425	ENSRNOT00000059627			Ptpn3			protein_coding
NA_peak_1510	17	10066138	10066138	+	1406355	NA	promoter-TSS (ENSRNOT00000091200)	protein_coding-promoter-TSS (ENSRNOT00000091200)	-49	ENSRNOT00000091200	ENSRNOG00000016891	ENSRNOT00000091200			Uimc1			protein_coding
NA_peak_2274	3	11381760	11381760	+	1406355	NA	intron (ENSRNOT00000064039, intron 1 of 22)	protein_coding-intron (ENSRNOT00000047921, intron 1 of 21)	244	ENSRNOT00000047921	ENSRNOG00000033835	ENSRNOT00000064039			Dnm1			protein_coding
NA_peak_3258	7	3315727	3315727	+	1406355	NA	exon (ENSRNOT00000010035, exon 1 of 3)	protein_coding-exon (ENSRNOT00000010035, exon 1 of 3)	129	ENSRNOT00000010035	ENSRNOG00000007610	ENSRNOT00000010035			Gdf11			protein_coding
NA_peak_3126	6	72596540	72596540	+	1400774	NA	promoter-TSS (ENSRNOT00000008459)	protein_coding-promoter-TSS (ENSRNOT00000008459)	-94	ENSRNOT00000008459	ENSRNOG00000006905	ENSRNOT00000008459			Hectd1			protein_coding
NA_peak_3580	8	51859923	51859923	+	1400774	NA	Intergenic	Intergenic	-71172	ENSRNOT00000071170	ENSRNOG00000050412	ENSRNOT00000071170			AABR07070098.1			miRNA
NA_peak_2955	5	150725934	150725934	+	1400774	NA	intron (ENSRNOT00000017740, intron 1 of 8)	protein_coding-intron (ENSRNOT00000017740, intron 1 of 8)	260	ENSRNOT00000017740	ENSRNOG00000013255	ENSRNOT00000017740			Dnajc8			protein_coding
NA_peak_252	1	198926810	198926810	+	1400534	NA	intron (ENSRNOT00000085954, intron 1 of 1)	protein_coding-intron (ENSRNOT00000085954, intron 1 of 1)	-6060	ENSRNOT00000055003	ENSRNOG00000042728	ENSRNOT00000055003			Fbrs			protein_coding
NA_peak_2489	3	162872268	162872268	+	1400534	NA	intron (ENSRNOT00000008478, intron 1 of 20)	protein_coding-intron (ENSRNOT00000008478, intron 1 of 20)	563	ENSRNOT00000008478	ENSRNOG00000006052	ENSRNOT00000008478			Sulf2			protein_coding
NA_peak_3475	7	134799101	134799101	+	1400534	NA	Intergenic	Intergenic	-76886	ENSRNOT00000036750	ENSRNOG00000022772	ENSRNOT00000036750			Prickle1			protein_coding
NA_peak_869	12	13090431	13090431	+	1400534	NA	promoter-TSS (ENSRNOT00000001417)	protein_coding-promoter-TSS (ENSRNOT00000001417)	64	ENSRNOT00000001417	ENSRNOG00000001068	ENSRNOT00000092628			Rac1			protein_coding
NA_peak_1104	14	7326157	7326157	+	1400534	NA	promoter-TSS (ENSRNOT00000066071)	protein_coding-promoter-TSS (ENSRNOT00000066071)	-512	ENSRNOT00000066071	ENSRNOG00000002232	ENSRNOT00000066071			Aff1			protein_coding
NA_peak_3056	6	1621938	1621938	+	1400534	NA	intron (ENSRNOT00000007492, intron 1 of 18)	protein_coding-intron (ENSRNOT00000007492, intron 1 of 18)	258	ENSRNOT00000007492	ENSRNOG00000005289	ENSRNOT00000007492			Prkd3			protein_coding
NA_peak_217	1	175894965	175894965	+	1400534	NA	intron (ENSRNOT00000064535, intron 1 of 21)	protein_coding-intron (ENSRNOT00000064535, intron 1 of 21)	545	ENSRNOT00000064535	ENSRNOG00000017158	ENSRNOT00000064535			Eif4g2			protein_coding
NA_peak_937	12	39769230	39769230	+	1400534	NA	exon (ENSRNOT00000036137, exon 1 of 6)	protein_coding-exon (ENSRNOT00000036137, exon 1 of 6)	250	ENSRNOT00000036137	ENSRNOG00000021440	ENSRNOT00000036137			Pptc7			protein_coding
NA_peak_986	13	25966619	25966619	+	1400534	NA	promoter-TSS (ENSRNOT00000086167)	protein_coding-promoter-TSS (ENSRNOT00000086167)	191	ENSRNOT00000003870	ENSRNOG00000002882	ENSRNOT00000003870			Zcchc2			protein_coding
NA_peak_2497	3	164248971	164248971	+	1400534	NA	intron (ENSRNOT00000086459, intron 1 of 5)	protein_coding-intron (ENSRNOT00000086459, intron 1 of 5)	240	ENSRNOT00000086459	ENSRNOG00000060821	ENSRNOT00000086459			Rnf114			protein_coding
NA_peak_2649	4	99937808	99937808	+	1400534	NA	promoter-TSS (ENSRNOT00000078793)	protein_coding-promoter-TSS (ENSRNOT00000078793)	97	ENSRNOT00000078793	ENSRNOG00000010284	ENSRNOT00000050249			St3gal5			protein_coding
NA_peak_2228	3	2649059	2649059	+	1400534	NA	intron (ENSRNOT00000020339, intron 1 of 47)	protein_coding-intron (ENSRNOT00000020339, intron 1 of 47)	174	ENSRNOT00000020339	ENSRNOG00000014268	ENSRNOT00000020339			Abca2			protein_coding
NA_peak_194	1	162549828	162549828	+	1394149	NA	intron (ENSRNOT00000037050, intron 1 of 14)	protein_coding-intron (ENSRNOT00000037050, intron 1 of 14)	408	ENSRNOT00000037050	ENSRNOG00000024194	ENSRNOT00000037050			Rsf1			protein_coding
NA_peak_1028	13	75059315	75059315	+	1394149	NA	promoter-TSS (ENSRNOT00000080801)	protein_coding-promoter-TSS (ENSRNOT00000080801)	11	ENSRNOT00000089062	ENSRNOG00000004917	ENSRNOT00000033324			Rasal2			protein_coding
NA_peak_1791	19	39230342	39230342	+	1394149	NA	intron (ENSRNOT00000050612, intron 1 of 10)	protein_coding-intron (ENSRNOT00000050612, intron 1 of 10)	588	ENSRNOT00000050612	ENSRNOG00000020351	ENSRNOT00000050612			Vps4a			protein_coding
NA_peak_2769	5	24255338	24255338	+	1394149	NA	intron (ENSRNOT00000037483, intron 1 of 1)	protein_coding-intron (ENSRNOT00000037483, intron 1 of 1)	268	ENSRNOT00000037483	ENSRNOG00000026662	ENSRNOT00000037483			Plekhf2			protein_coding
NA_peak_15	1	11971822	11971822	+	1388688	NA	Intergenic	Intergenic	1730	ENSRNOT00000090107	ENSRNOG00000053888	ENSRNOT00000090107			5_8S_rRNA			rRNA
NA_peak_1359	15	103344660	103344660	+	1383643	NA	intron (ENSRNOT00000013329, intron 1 of 8)	protein_coding-intron (ENSRNOT00000013329, intron 1 of 8)	113	ENSRNOT00000078103	ENSRNOG00000009766	ENSRNOT00000078103			Gpr180			protein_coding
NA_peak_1495	17	6701468	6701468	+	1383643	NA	promoter-TSS (ENSRNOT00000080683)	protein_coding-promoter-TSS (ENSRNOT00000080683)	48	ENSRNOT00000080683	ENSRNOG00000019257	ENSRNOT00000080683			Kif27			protein_coding
NA_peak_1194	14	83062197	83062197	+	1383643	NA	exon (ENSRNOT00000085735, exon 1 of 2)	protein_coding-exon (ENSRNOT00000085735, exon 1 of 2)	105	ENSRNOT00000086769	ENSRNOG00000055471	ENSRNOT00000085735			Ywhah			protein_coding
NA_peak_3013	5	164961763	164961763	+	1383643	NA	Intergenic	Intergenic	-1912	ENSRNOT00000012301	ENSRNOG00000009217	ENSRNOT00000012301			Fbxo6			protein_coding
NA_peak_3074	6	12158620	12158620	+	1383643	NA	Intergenic	Intergenic	-20607	ENSRNOT00000061693	ENSRNOG00000040110	ENSRNOT00000061693			Foxn2			protein_coding
NA_peak_3492	7	140291222	140291222	+	1374201	NA	promoter-TSS (ENSRNOT00000082699)	protein_coding-promoter-TSS (ENSRNOT00000082699)	398	ENSRNOT00000088323	ENSRNOG00000054757	ENSRNOT00000088323			Adcy6			protein_coding
NA_peak_2383	3	103725925	103725925	+	1370926	NA	promoter-TSS (ENSRNOT00000006776)	protein_coding-promoter-TSS (ENSRNOT00000006776)	-313	ENSRNOT00000006776	ENSRNOG00000005058	ENSRNOT00000006776			Lpcat4			protein_coding
NA_peak_1480	16	86601091	86601091	+	1370926	NA	promoter-TSS (ENSRNOT00000089939)	miRNA-promoter-TSS (ENSRNOT00000089939)	-150	ENSRNOT00000089939	ENSRNOG00000060161	ENSRNOT00000089939						miRNA
NA_peak_671	10	95242943	95242943	+	1370926	NA	promoter-TSS (ENSRNOT00000065589)	protein_coding-promoter-TSS (ENSRNOT00000065589)	-43	ENSRNOT00000065589	ENSRNOG00000043295	ENSRNOT00000080460			RGD1565033			protein_coding
NA_peak_472	10	16752073	16752073	+	1370926	NA	intron (ENSRNOT00000079462, intron 1 of 8)	protein_coding-intron (ENSRNOT00000079462, intron 1 of 8)	132	ENSRNOT00000079462	ENSRNOG00000020769	ENSRNOT00000028186			Crebrf			protein_coding
NA_peak_2393	3	112789221	112789221	+	1369425	NA	promoter-TSS (ENSRNOT00000066181)	protein_coding-promoter-TSS (ENSRNOT00000066181)	61	ENSRNOT00000090680	ENSRNOG00000011059	ENSRNOT00000090680			Ttbk2			protein_coding
NA_peak_3539	8	22476500	22476500	+	1369425	NA	intron (ENSRNOT00000066007, intron 1 of 20)	protein_coding-intron (ENSRNOT00000010947, intron 1 of 20)	17504	ENSRNOT00000065028	ENSRNOG00000007649	ENSRNOT00000065028			Dnm2			protein_coding
NA_peak_2632	4	83137096	83137096	+	1369425	NA	intron (ENSRNOT00000039580, intron 1 of 4)	protein_coding-intron (ENSRNOT00000039580, intron 1 of 4)	431	ENSRNOT00000039580	ENSRNOG00000027026	ENSRNOT00000039580			Jazf1			protein_coding
NA_peak_3748	9	10846606	10846606	+	1369425	NA	promoter-TSS (ENSRNOT00000075386)	protein_coding-promoter-TSS (ENSRNOT00000075386)	10	ENSRNOT00000075386	ENSRNOG00000050748	ENSRNOT00000075386			Dpp9			protein_coding
NA_peak_3162	6	101327925	101327925	+	1369425	NA	Intergenic	Intergenic	38974	ENSRNOT00000046901	ENSRNOG00000033423	ENSRNOT00000046901			Ccdc196			protein_coding
NA_peak_2125	20	4357964	4357964	+	1369425	NA	TTS (ENSRNOT00000000510)	protein_coding-TTS (ENSRNOT00000000510)	231	ENSRNOT00000000509	ENSRNOG00000000440	ENSRNOT00000082667			Pbx2			protein_coding
NA_peak_415	1	274310341	274310341	+	1369425	NA	intron (ENSRNOT00000054686, intron 1 of 30)	protein_coding-intron (ENSRNOT00000019560, intron 1 of 28)	188	ENSRNOT00000054686	ENSRNOG00000014173	ENSRNOT00000054686			Smc3			protein_coding
NA_peak_30	1	28301924	28301924	+	1369425	NA	promoter-TSS (ENSRNOT00000017831)	protein_coding-promoter-TSS (ENSRNOT00000017831)	2	ENSRNOT00000017831	ENSRNOG00000013323	ENSRNOT00000017831			Rnf217			protein_coding
NA_peak_255	1	199167253	199167253	+	1369425	NA	exon (ENSRNOT00000025646, exon 3 of 3)	protein_coding-exon (ENSRNOT00000025646, exon 3 of 3)	4167	ENSRNOT00000025646	ENSRNOG00000018962	ENSRNOT00000025646			Ctf1			protein_coding
NA_peak_2141	20	7133338	7133338	+	1369425	NA	Intergenic	Intergenic	-2669	ENSRNOT00000000580	ENSRNOG00000000488	ENSRNOT00000000580			Hmga1			protein_coding
NA_peak_2540	4	6753124	6753124	+	1369425	NA	intron (ENSRNOT00000067183, intron 4 of 15)	protein_coding-intron (ENSRNOT00000067183, intron 4 of 15)	-74305	ENSRNOT00000071737	ENSRNOG00000050578	ENSRNOT00000071737			Rheb			protein_coding
NA_peak_2695	4	145264581	145264581	+	1369425	NA	exon (ENSRNOT00000011246, exon 1 of 14)	protein_coding-exon (ENSRNOT00000011246, exon 1 of 14)	119	ENSRNOT00000011246	ENSRNOG00000008142	ENSRNOT00000011246			Brpf1			protein_coding
NA_peak_1205	14	85318085	85318085	+	1369425	NA	intron (ENSRNOT00000065135, intron 1 of 6)	protein_coding-intron (ENSRNOT00000065135, intron 1 of 6)	109	ENSRNOT00000065135	ENSRNOG00000009040	ENSRNOT00000065135			Gas2l1			protein_coding
NA_peak_1163	14	62609644	62609644	+	1369425	NA	exon (ENSRNOT00000003017, exon 1 of 17)	protein_coding-exon (ENSRNOT00000003017, exon 1 of 17)	160	ENSRNOT00000003017	ENSRNOG00000002207	ENSRNOT00000003017			Guf1			protein_coding
NA_peak_253	1	199063814	199063814	+	1369425	NA	intron (ENSRNOT00000044511, intron 1 of 2)	protein_coding-intron (ENSRNOT00000044511, intron 1 of 2)	336	ENSRNOT00000044511	ENSRNOG00000018877	ENSRNOT00000024969			Zfp629			protein_coding
NA_peak_1772	19	26151688	26151688	+	1369425	NA	promoter-TSS (ENSRNOT00000005571)	protein_coding-promoter-TSS (ENSRNOT00000005571)	-212	ENSRNOT00000005571	ENSRNOG00000003970	ENSRNOT00000005571			Tnpo2			protein_coding
NA_peak_127	1	101010706	101010706	+	1369425	NA	Intergenic	Intergenic	-2116	ENSRNOT00000027809	ENSRNOG00000037247	ENSRNOT00000027809			Rras			protein_coding
NA_peak_1171	14	76990110	76990110	+	1369425	NA	intron (ENSRNOT00000024012, intron 1 of 14)	protein_coding-intron (ENSRNOT00000024012, intron 1 of 14)	191	ENSRNOT00000024012	ENSRNOG00000028498	ENSRNOT00000024012			Wdr1			protein_coding
NA_peak_1328	15	52288792	52288792	+	1369425	NA	intron (ENSRNOT00000016209, intron 1 of 16)	protein_coding-intron (ENSRNOT00000016209, intron 1 of 16)	101	ENSRNOT00000016209	ENSRNOG00000012014	ENSRNOT00000016209			Fam160b2			protein_coding
NA_peak_3131	6	75669825	75669825	+	1369425	NA	intron (ENSRNOT00000007300, intron 2 of 13)	protein_coding-intron (ENSRNOT00000007300, intron 2 of 13)	310	ENSRNOT00000007300	ENSRNOG00000005249	ENSRNOT00000007300			Snx6			protein_coding
NA_peak_3206	6	126170869	126170869	+	1369425	NA	promoter-TSS (ENSRNOT00000077477)	protein_coding-promoter-TSS (ENSRNOT00000077477)	-42	ENSRNOT00000077477	ENSRNOG00000007062	ENSRNOT00000065246			Rin3			protein_coding
NA_peak_2565	4	21862708	21862708	+	1369425	NA	intron (ENSRNOT00000007948, intron 1 of 16)	protein_coding-intron (ENSRNOT00000007948, intron 1 of 16)	395	ENSRNOT00000007948	ENSRNOG00000005908	ENSRNOT00000007948			Dmtf1			protein_coding
NA_peak_2316	3	47685379	47685379	+	1369425	NA	exon (ENSRNOT00000065340, exon 8 of 9)	protein_coding-exon (ENSRNOT00000065340, exon 8 of 9)	-3564	ENSRNOT00000078922	ENSRNOG00000054061	ENSRNOT00000078922			AABR07052327.1			lincRNA
NA_peak_3354	7	65004777	65004777	+	1369425	NA	Intergenic	Intergenic	-1014	ENSRNOT00000005794	ENSRNOG00000004316	ENSRNOT00000005794			Llph			protein_coding
NA_peak_39	1	35280819	35280819	+	1369425	NA	intron (ENSRNOT00000061873, intron 1 of 18)	protein_coding-intron (ENSRNOT00000061873, intron 1 of 18)	118	ENSRNOT00000061873	ENSRNOG00000023053	ENSRNOT00000061873			Ice1			protein_coding
NA_peak_2278	3	12029557	12029557	+	1369425	NA	exon (ENSRNOT00000022327, exon 2 of 10)	protein_coding-exon (ENSRNOT00000022327, exon 2 of 10)	320	ENSRNOT00000022327	ENSRNOG00000022274	ENSRNOT00000022327			Slc2a8			protein_coding
NA_peak_1070	13	101769931	101769931	+	1369425	NA	Intergenic	Intergenic	-8390	ENSRNOT00000085600	ENSRNOG00000059202	ENSRNOT00000080170			AABR07021988.1			protein_coding
NA_peak_2843	5	90419056	90419056	+	1369425	NA	promoter-TSS (ENSRNOT00000058893)	protein_coding-promoter-TSS (ENSRNOT00000058893)	36	ENSRNOT00000058893	ENSRNOG00000024190	ENSRNOT00000058893			Rasef			protein_coding
NA_peak_982	12	51948978	51948978	+	1369425	NA	intron (ENSRNOT00000056735, intron 1 of 51)	protein_coding-intron (ENSRNOT00000056735, intron 1 of 51)	328	ENSRNOT00000056735	ENSRNOG00000037483	ENSRNOT00000084214			Ep400			protein_coding
NA_peak_2127	20	4414637	4414637	+	1369425	NA	intron (ENSRNOT00000000492, intron 1 of 16)	protein_coding-intron (ENSRNOT00000000492, intron 1 of 16)	361	ENSRNOT00000000492	ENSRNOG00000000431	ENSRNOT00000000492			Atf6b			protein_coding
NA_peak_303	1	220948266	220948266	+	1369425	NA	promoter-TSS (ENSRNOT00000036185)	protein_coding-promoter-TSS (ENSRNOT00000036185)	-65	ENSRNOT00000036185	ENSRNOG00000026114	ENSRNOT00000036185			Ap5b1			protein_coding
NA_peak_1748	19	19832561	19832561	+	1369425	NA	promoter-TSS (ENSRNOT00000067582)	protein_coding-promoter-TSS (ENSRNOT00000067582)	-102	ENSRNOT00000067582	ENSRNOG00000024212	ENSRNOT00000084657			Tent4b			protein_coding
NA_peak_3525	8	7446004	7446004	+	1369425	NA	Intergenic	Intergenic	-19393	ENSRNOT00000031492	ENSRNOG00000026821	ENSRNOT00000031492			Arhgap42			protein_coding
NA_peak_2524	3	176431318	176431318	+	1369425	NA	exon (ENSRNOT00000037271, exon 1 of 5)	protein_coding-exon (ENSRNOT00000037271, exon 1 of 5)	105	ENSRNOT00000037271	ENSRNOG00000027015	ENSRNOT00000037271			Ythdf1			protein_coding
NA_peak_607	10	75366258	75366258	+	1369425	NA	intron (ENSRNOT00000055705, intron 1 of 5)	protein_coding-intron (ENSRNOT00000055705, intron 1 of 5)	436	ENSRNOT00000055705	ENSRNOG00000009819	ENSRNOT00000055705			Vezf1			protein_coding
NA_peak_2060	2	211207577	211207577	+	1362457	NA	promoter-TSS (ENSRNOT00000027263)	protein_coding-promoter-TSS (ENSRNOT00000027263)	-112	ENSRNOT00000027263	ENSRNOG00000020058	ENSRNOT00000027263			Celsr2			protein_coding
NA_peak_2259	3	8741875	8741875	+	1362457	NA	exon (ENSRNOT00000021531, exon 1 of 3)	protein_coding-exon (ENSRNOT00000021531, exon 1 of 3)	109	ENSRNOT00000021531	ENSRNOG00000016033	ENSRNOT00000021531			Endog			protein_coding
NA_peak_431	10	1151616	1151616	+	1361434	NA	TTS (ENSRNOT00000075716)	miRNA-TTS (ENSRNOT00000075716)	204	ENSRNOT00000075716	ENSRNOG00000050873	ENSRNOT00000075716			AABR07028970.1			miRNA
NA_peak_2949	5	150217430	150217430	+	1361434	NA	Intergenic	Intergenic	-50353	ENSRNOT00000067349	ENSRNOG00000010037	ENSRNOT00000013761			Epb41			protein_coding
NA_peak_829	11	84643513	84643513	+	1361434	NA	Intergenic	Intergenic	-10009	ENSRNOT00000052120	ENSRNOG00000033372	ENSRNOT00000052120			Klhl24			protein_coding
NA_peak_1803	19	43750598	43750598	+	1361434	NA	exon (ENSRNOT00000025716, exon 1 of 4)	protein_coding-exon (ENSRNOT00000025716, exon 1 of 4)	320	ENSRNOT00000025716	ENSRNOG00000019028	ENSRNOT00000025716			Znrf1			protein_coding
NA_peak_3015	5	165441853	165441853	+	1361434	NA	intron (ENSRNOT00000049822, intron 1 of 7)	protein_coding-intron (ENSRNOT00000049822, intron 1 of 7)	195	ENSRNOT00000049822	ENSRNOG00000012455	ENSRNOT00000049822			Tardbp			protein_coding
NA_peak_1403	16	19886025	19886025	+	1361434	NA	TTS (ENSRNOT00000060404)	protein_coding-TTS (ENSRNOT00000060404)	4903	ENSRNOT00000060404	ENSRNOG00000039417	ENSRNOT00000060404			Dda1			protein_coding
NA_peak_1984	2	142686890	142686890	+	1361434	NA	promoter-TSS (ENSRNOT00000014562)	protein_coding-promoter-TSS (ENSRNOT00000014562)	166	ENSRNOT00000014614	ENSRNOG00000010980	ENSRNOT00000014614			Proser1			protein_coding
NA_peak_3725	8	129240650	129240650	+	1361434	NA	promoter-TSS (ENSRNOT00000063787)	protein_coding-promoter-TSS (ENSRNOT00000063787)	122	ENSRNOT00000083427	ENSRNOG00000019007	ENSRNOT00000063787			Rpl14			protein_coding
NA_peak_1179	14	79539066	79539066	+	1361434	NA	exon (ENSRNOT00000009960, exon 1 of 28)	protein_coding-exon (ENSRNOT00000009960, exon 1 of 28)	155	ENSRNOT00000009960	ENSRNOG00000007033	ENSRNOT00000009960			Sorcs2			protein_coding
NA_peak_1120	14	16275913	16275913	+	1361434	NA	exon (ENSRNOT00000002876, exon 1 of 8)	protein_coding-exon (ENSRNOT00000002876, exon 1 of 8)	155	ENSRNOT00000002876	ENSRNOG00000002089	ENSRNOT00000002876			Ccng2			protein_coding
NA_peak_1463	16	74407727	74407727	+	1361434	NA	promoter-TSS (ENSRNOT00000036506)	protein_coding-promoter-TSS (ENSRNOT00000036506)	303	ENSRNOT00000026418	ENSRNOG00000019490	ENSRNOT00000084330			Slc20a2			protein_coding
NA_peak_2033	2	196487811	196487811	+	1361434	NA	intron (ENSRNOT00000080324, intron 1 of 10)	protein_coding-intron (ENSRNOT00000028699, intron 1 of 10)	127	ENSRNOT00000080324	ENSRNOG00000021138	ENSRNOT00000080324			Cers2			protein_coding
NA_peak_3898	9	119332713	119332713	+	1361434	NA	intron (ENSRNOT00000021048, intron 1 of 3)	protein_coding-intron (ENSRNOT00000021048, intron 1 of 3)	254	ENSRNOT00000021048	ENSRNOG00000015278	ENSRNOT00000021048			Myl12a			protein_coding
NA_peak_3035	5	169475414	169475414	+	1361434	NA	exon (ENSRNOT00000014625, exon 1 of 5)	protein_coding-exon (ENSRNOT00000014625, exon 1 of 5)	144	ENSRNOT00000014625	ENSRNOG00000010953	ENSRNOT00000014625			Icmt			protein_coding
NA_peak_3480	7	137678216	137678216	+	1361434	NA	Intergenic	Intergenic	-2314	ENSRNOT00000006970	ENSRNOG00000004831	ENSRNOT00000006970			Arid2			protein_coding
NA_peak_3568	8	48925048	48925048	+	1361434	NA	promoter-TSS (ENSRNOT00000077445)	protein_coding-promoter-TSS (ENSRNOT00000077445)	-556	ENSRNOT00000077445	ENSRNOG00000053932	ENSRNOT00000077445			Ddx6			protein_coding
NA_peak_2942	5	148257465	148257465	+	1361434	NA	promoter-TSS (ENSRNOT00000067663)	protein_coding-promoter-TSS (ENSRNOT00000067663)	-177	ENSRNOT00000067663	ENSRNOG00000031475	ENSRNOT00000067663			Col16a1			protein_coding
NA_peak_1156	14	59734874	59734874	+	1361434	NA	intron (ENSRNOT00000071929, intron 1 of 11)	protein_coding-intron (ENSRNOT00000071929, intron 1 of 11)	576	ENSRNOT00000071929	ENSRNOG00000046327	ENSRNOT00000071929			Rbpj			protein_coding
NA_peak_2237	3	3950871	3950871	+	1361434	NA	exon (ENSRNOT00000026212, exon 1 of 34)	protein_coding-exon (ENSRNOT00000026212, exon 1 of 34)	154	ENSRNOT00000026212	ENSRNOG00000019322	ENSRNOT00000026212			Notch1			protein_coding
NA_peak_3424	7	120140779	120140779	+	1361434	NA	exon (ENSRNOT00000040513, exon 1 of 2)	protein_coding-exon (ENSRNOT00000040513, exon 1 of 2)	287	ENSRNOT00000073905	ENSRNOG00000009570	ENSRNOT00000073905			Pdxp			protein_coding
NA_peak_1055	13	98078648	98078648	+	1361434	NA	promoter-TSS (ENSRNOT00000078034)	protein_coding-promoter-TSS (ENSRNOT00000078034)	-93	ENSRNOT00000078034	ENSRNOG00000023541	ENSRNOT00000078034			Ahctf1			protein_coding
NA_peak_1204	14	85311197	85311197	+	1361434	NA	promoter-TSS (ENSRNOT00000064933)	protein_coding-promoter-TSS (ENSRNOT00000064933)	108	ENSRNOT00000080541	ENSRNOG00000008951	ENSRNOT00000080541			Rasl10a			protein_coding
NA_peak_3762	9	17341223	17341223	+	1361434	NA	promoter-TSS (ENSRNOT00000085241)	protein_coding-promoter-TSS (ENSRNOT00000085241)	-121	ENSRNOT00000085241	ENSRNOG00000019598	ENSRNOT00000083811			Vegfa			protein_coding
NA_peak_2579	4	34238752	34238752	+	1361434	NA	intron (ENSRNOT00000084163, intron 1 of 10)	protein_coding-intron (ENSRNOT00000010952, intron 1 of 11)	312	ENSRNOT00000010952	ENSRNOG00000007924	ENSRNOT00000084163			Mios			protein_coding
NA_peak_2853	5	113532746	113532746	+	1361434	NA	intron (ENSRNOT00000010173, intron 1 of 5)	protein_coding-intron (ENSRNOT00000010173, intron 1 of 5)	132	ENSRNOT00000010173	ENSRNOG00000007299	ENSRNOT00000010173			Caap1			protein_coding
NA_peak_3260	7	11019792	11019792	+	1361434	NA	Intergenic	Intergenic	-1632	ENSRNOT00000092061	ENSRNOG00000052025	ENSRNOT00000092061			Tle5			protein_coding
NA_peak_1444	16	60307278	60307278	+	1361434	NA	exon (ENSRNOT00000015239, exon 1 of 7)	protein_coding-exon (ENSRNOT00000015239, exon 1 of 7)	130	ENSRNOT00000015239	ENSRNOG00000011448	ENSRNOT00000015239			Eri1			protein_coding
NA_peak_2800	5	60735355	60735355	+	1361434	NA	Intergenic	Intergenic	-74407	ENSRNOT00000016839	ENSRNOG00000012546	ENSRNOT00000016839			Frmpd1			protein_coding
NA_peak_3199	6	122730139	122730139	+	1361434	NA	promoter-TSS (ENSRNOT00000086253)	lincRNA-promoter-TSS (ENSRNOT00000086253)	265	ENSRNOT00000040440	ENSRNOG00000004083	ENSRNOT00000039509			Zc3h14			protein_coding
NA_peak_2841	5	88629483	88629483	+	1361434	NA	promoter-TSS (ENSRNOT00000058906)	protein_coding-promoter-TSS (ENSRNOT00000058906)	8	ENSRNOT00000058906	ENSRNOG00000005882	ENSRNOT00000089560			Tle1			protein_coding
NA_peak_2662	4	117962109	117962109	+	1361434	NA	promoter-TSS (ENSRNOT00000057441)	protein_coding-promoter-TSS (ENSRNOT00000057441)	-210	ENSRNOT00000057441	ENSRNOG00000016182	ENSRNOT00000057441			Tgfa			protein_coding
NA_peak_729	10	110182027	110182027	+	1361434	NA	exon (ENSRNOT00000015178, exon 1 of 9)	protein_coding-exon (ENSRNOT00000015178, exon 1 of 9)	264	ENSRNOT00000015178	ENSRNOG00000036676	ENSRNOT00000054936			Csnk1d			protein_coding
NA_peak_739	11	16889193	16889193	+	1361434	NA	promoter-TSS (ENSRNOT00000002121)	protein_coding-promoter-TSS (ENSRNOT00000002121)	8	ENSRNOT00000002121	ENSRNOG00000001555	ENSRNOT00000002121			Btg3			protein_coding
NA_peak_2368	3	82734357	82734357	+	1361434	NA	intron (ENSRNOT00000083743, intron 1 of 13)	protein_coding-intron (ENSRNOT00000012161, intron 1 of 12)	163	ENSRNOT00000083743	ENSRNOG00000008944	ENSRNOT00000083743			Ext2			protein_coding
NA_peak_77	1	78069293	78069293	+	1361434	NA	promoter-TSS (ENSRNOT00000068406)	protein_coding-promoter-TSS (ENSRNOT00000068406)	100	ENSRNOT00000068406	ENSRNOG00000021390	ENSRNOT00000068406			Meis3			protein_coding
NA_peak_3625	8	70522112	70522112	+	1361434	NA	promoter-TSS (ENSRNOT00000025873)	protein_coding-promoter-TSS (ENSRNOT00000025873)	20	ENSRNOT00000025873	ENSRNOG00000019105	ENSRNOT00000025873			Dpp8			protein_coding
NA_peak_2871	5	127043463	127043463	+	1361434	NA	TTS (ENSRNOT00000075357)	miRNA-TTS (ENSRNOT00000075357)	177	ENSRNOT00000075357	ENSRNOG00000050174	ENSRNOT00000075357			AABR07049535.1			miRNA
NA_peak_2203	20	42968012	42968012	+	1361434	NA	intron (ENSRNOT00000000707, intron 1 of 2)	protein_coding-intron (ENSRNOT00000000707, intron 1 of 2)	1872	ENSRNOT00000000707	ENSRNOG00000000579	ENSRNOT00000000707			Marcks			protein_coding
NA_peak_1062	13	100453789	100453789	+	1361434	NA	Intergenic	Intergenic	-1681	ENSRNOT00000091160	ENSRNOG00000060813	ENSRNOT00000091160			5S_rRNA			rRNA
NA_peak_2502	3	164822362	164822362	+	1361434	NA	exon (ENSRNOT00000014568, exon 1 of 3)	protein_coding-exon (ENSRNOT00000014568, exon 1 of 3)	251	ENSRNOT00000014568	ENSRNOG00000010883	ENSRNOT00000014568			Pard6b			protein_coding
NA_peak_86	1	80471240	80471240	+	1361434	NA	exon (ENSRNOT00000023867, exon 1 of 13)	protein_coding-exon (ENSRNOT00000023867, exon 1 of 13)	287	ENSRNOT00000023867	ENSRNOG00000017692	ENSRNOT00000023867			Ppp1r37			protein_coding
NA_peak_117	1	91363754	91363754	+	1361434	NA	exon (ENSRNOT00000014517, exon 1 of 1)	protein_coding-exon (ENSRNOT00000014517, exon 1 of 1)	262	ENSRNOT00000014517	ENSRNOG00000010918	ENSRNOT00000014517			Cebpa			protein_coding
NA_peak_3728	8	130398766	130398766	+	1361434	NA	Intergenic	Intergenic	-2704	ENSRNOT00000043346	ENSRNOG00000019382	ENSRNOT00000043346			Zbtb47			protein_coding
NA_peak_3779	9	41337324	41337324	+	1359916	NA	intron (ENSRNOT00000039480, intron 1 of 6)	protein_coding-intron (ENSRNOT00000039480, intron 1 of 6)	174	ENSRNOT00000039480	ENSRNOG00000023467	ENSRNOT00000039480			Fam168b			protein_coding
NA_peak_1545	17	26926042	26926042	+	1347812	NA	exon (ENSRNOT00000018310, exon 1 of 10)	protein_coding-exon (ENSRNOT00000018310, exon 1 of 10)	214	ENSRNOT00000018310	ENSRNOG00000013469	ENSRNOT00000018310			Txndc5			protein_coding
NA_peak_1699	18	69548865	69548865	+	1347812	NA	Intergenic	Intergenic	-1072	ENSRNOT00000041227	ENSRNOG00000015777	ENSRNOT00000041227			Mex3c			protein_coding
NA_peak_1604	17	85378045	85378045	+	1347812	NA	Intergenic	Intergenic	-4071	ENSRNOT00000002513	ENSRNOG00000022021	ENSRNOT00000002513			Spag6			protein_coding
NA_peak_3183	6	107531768	107531768	+	1347812	NA	exon (ENSRNOT00000077555, exon 1 of 4)	protein_coding-exon (ENSRNOT00000077555, exon 1 of 4)	240	ENSRNOT00000077555	ENSRNOG00000053460	ENSRNOT00000077555			Acot3			protein_coding
NA_peak_3593	8	60710146	60710146	+	1347812	NA	exon (ENSRNOT00000021817, exon 1 of 7)	protein_coding-exon (ENSRNOT00000021817, exon 1 of 7)	295	ENSRNOT00000021817	ENSRNOG00000015780	ENSRNOT00000021817			Rcn2			protein_coding
NA_peak_2523	3	176217166	176217166	+	1347812	NA	promoter-TSS (ENSRNOT00000013609)	protein_coding-promoter-TSS (ENSRNOT00000013609)	38	ENSRNOT00000013609	ENSRNOG00000010180	ENSRNOT00000013609			Gid8			protein_coding
NA_peak_1928	2	80293037	80293037	+	1347812	NA	exon (ENSRNOT00000016111, exon 1 of 7)	protein_coding-exon (ENSRNOT00000016111, exon 1 of 7)	144	ENSRNOT00000016111	ENSRNOG00000012017	ENSRNOT00000016111			Otulin			protein_coding
NA_peak_728	10	110005676	110005676	+	1347812	NA	intron (ENSRNOT00000073321, intron 1 of 42)	protein_coding-intron (ENSRNOT00000073321, intron 1 of 42)	225	ENSRNOT00000073321	ENSRNOG00000045636	ENSRNOT00000073321			Fasn			protein_coding
NA_peak_3210	6	126748093	126748093	+	1347812	NA	Intergenic	Intergenic	-18874	ENSRNOT00000052296	ENSRNOG00000031106	ENSRNOT00000052296			Cox8c			protein_coding
NA_peak_1477	16	83521855	83521855	+	1347812	NA	promoter-TSS (ENSRNOT00000057386)	protein_coding-promoter-TSS (ENSRNOT00000057386)	-307	ENSRNOT00000057386	ENSRNOG00000016281	ENSRNOT00000057386			Col4a1			protein_coding
NA_peak_495	10	36717120	36717120	+	1347812	NA	promoter-TSS (ENSRNOT00000038838)	protein_coding-promoter-TSS (ENSRNOT00000038838)	-519	ENSRNOT00000038838	ENSRNOG00000022555	ENSRNOT00000038838			LOC497899			protein_coding
NA_peak_3184	6	107677447	107677447	+	1347812	NA	intron (ENSRNOT00000014158, intron 1 of 12)	protein_coding-intron (ENSRNOT00000014158, intron 1 of 12)	709	ENSRNOT00000014158	ENSRNOG00000010653	ENSRNOT00000014158			Elmsan1			protein_coding
NA_peak_437	10	5199492	5199492	+	1347812	NA	exon (ENSRNOT00000003544, exon 1 of 2)	protein_coding-exon (ENSRNOT00000003544, exon 1 of 2)	266	ENSRNOT00000003544	ENSRNOG00000002635	ENSRNOT00000003544			Dexi			protein_coding
NA_peak_151	1	127803297	127803297	+	1347812	NA	intron (ENSRNOT00000055877, intron 1 of 22)	protein_coding-intron (ENSRNOT00000055877, intron 1 of 22)	319	ENSRNOT00000055877	ENSRNOG00000037080	ENSRNOT00000055877			Adamts17			protein_coding
NA_peak_3509	7	142061419	142061419	+	1347812	NA	intron (ENSRNOT00000089912, intron 1 of 13)	protein_coding-intron (ENSRNOT00000026531, intron 1 of 15)	-1268	ENSRNOT00000086780	ENSRNOG00000053802	ENSRNOT00000086780			AABR07058899.1			pseudogene
NA_peak_1559	17	42064538	42064538	+	1347812	NA	exon (ENSRNOT00000023787, exon 1 of 11)	protein_coding-exon (ENSRNOT00000023787, exon 1 of 11)	162	ENSRNOT00000023787	ENSRNOG00000017545	ENSRNOT00000023787			Mrs2			protein_coding
NA_peak_2576	4	29976908	29976908	+	1347812	NA	Intergenic	Intergenic	-1831	ENSRNOT00000011756	ENSRNOG00000008869	ENSRNOT00000011756			Ppp1r9a			protein_coding
NA_peak_1600	17	84847592	84847592	+	1347812	NA	Intergenic	Intergenic	-17407	ENSRNOT00000040697	ENSRNOG00000033330	ENSRNOT00000040697			Skida1			protein_coding
NA_peak_762	11	38456761	38456761	+	1347812	NA	intron (ENSRNOT00000041177, intron 1 of 3)	protein_coding-intron (ENSRNOT00000041177, intron 1 of 3)	612	ENSRNOT00000041177	ENSRNOG00000001623	ENSRNOT00000041177			Zbtb21			protein_coding
NA_peak_1654	18	28835796	28835796	+	1347812	NA	exon (ENSRNOT00000025902, exon 12 of 12)	protein_coding-exon (ENSRNOT00000025902, exon 12 of 12)	36053	ENSRNOT00000025902	ENSRNOG00000019093	ENSRNOT00000025902			Nrg2			protein_coding
NA_peak_2422	3	125503895	125503895	+	1347812	NA	exon (ENSRNOT00000028900, exon 1 of 7)	protein_coding-exon (ENSRNOT00000028900, exon 1 of 7)	257	ENSRNOT00000028900	ENSRNOG00000021273	ENSRNOT00000028900			Crls1			protein_coding
NA_peak_1289	15	33108832	33108832	+	1343857	NA	exon (ENSRNOT00000015468, exon 1 of 7)	protein_coding-exon (ENSRNOT00000015468, exon 1 of 7)	161	ENSRNOT00000015468	ENSRNOG00000011592	ENSRNOT00000015468			Lrp10			protein_coding
NA_peak_3581	8	55049918	55049918	+	1343857	NA	promoter-TSS (ENSRNOT00000013242)	protein_coding-promoter-TSS (ENSRNOT00000013242)	276	ENSRNOT00000013197	ENSRNOG00000009958	ENSRNOT00000086119			Nkapd1			protein_coding
NA_peak_14	1	11910995	11910995	+	1340682	NA	Intergenic	Intergenic	-4402	ENSRNOT00000089050	ENSRNOG00000051831	ENSRNOT00000089050			5_8S_rRNA			rRNA
NA_peak_595	10	70135032	70135032	+	1322318	NA	promoter-TSS (ENSRNOT00000076931)	lincRNA-promoter-TSS (ENSRNOT00000076931)	264	ENSRNOT00000055982	ENSRNOG00000021815	ENSRNOT00000076739			Lig3			protein_coding
NA_peak_494	10	35927015	35927015	+	1322318	NA	exon (ENSRNOT00000004740, exon 1 of 18)	protein_coding-exon (ENSRNOT00000004740, exon 1 of 18)	253	ENSRNOT00000004740	ENSRNOG00000003536	ENSRNOT00000004740			Rufy1			protein_coding
NA_peak_2267	3	9605011	9605011	+	1321923	NA	Intergenic	Intergenic	31047	ENSRNOT00000024953	ENSRNOG00000018486	ENSRNOT00000024953			RGD1311084			protein_coding
NA_peak_3442	7	122979357	122979357	+	1321923	NA	intron (ENSRNOT00000085707, intron 1 of 22)	protein_coding-intron (ENSRNOT00000085707, intron 1 of 22)	336	ENSRNOT00000085707	ENSRNOG00000055925	ENSRNOT00000085707			Zc3h7b			protein_coding
NA_peak_1009	13	55617281	55617281	+	1319726	NA	Intergenic	Intergenic	-55531	ENSRNOT00000090162	ENSRNOG00000000657	ENSRNOT00000090162			Nek7			protein_coding
NA_peak_2514	3	175408665	175408665	+	1319726	NA	promoter-TSS (ENSRNOT00000081344)	protein_coding-promoter-TSS (ENSRNOT00000081344)	36	ENSRNOT00000081344	ENSRNOG00000054557	ENSRNOT00000081344			Lsm14b			protein_coding
NA_peak_666	10	94280931	94280931	+	1319726	NA	exon (ENSRNOT00000088656, exon 1 of 16)	protein_coding-exon (ENSRNOT00000088656, exon 1 of 16)	228	ENSRNOT00000088656	ENSRNOG00000061424	ENSRNOT00000088656			Map3k3			protein_coding
NA_peak_1105	14	7863436	7863436	+	1319726	NA	exon (ENSRNOT00000061162, exon 1 of 48)	protein_coding-exon (ENSRNOT00000061162, exon 1 of 48)	228	ENSRNOT00000061162	ENSRNOG00000002061	ENSRNOT00000087081			Ptpn13			protein_coding
NA_peak_2165	20	14546444	14546444	+	1319726	NA	promoter-TSS (ENSRNOT00000001766)	protein_coding-promoter-TSS (ENSRNOT00000001766)	-672	ENSRNOT00000001766	ENSRNOG00000001304	ENSRNOT00000001766			Bcr			protein_coding
NA_peak_153	1	128341786	128341786	+	1319726	NA	promoter-TSS (ENSRNOT00000070864)	protein_coding-promoter-TSS (ENSRNOT00000070864)	-523	ENSRNOT00000072915	ENSRNOG00000047756	ENSRNOT00000070864			Mef2a			protein_coding
NA_peak_3552	8	33148395	33148395	+	1319726	NA	Intergenic	Intergenic	-27393	ENSRNOT00000047211	ENSRNOG00000034226	ENSRNOT00000047211			LOC100362981			protein_coding
NA_peak_623	10	85302098	85302098	+	1319726	NA	exon (ENSRNOT00000080935, exon 2 of 10)	protein_coding-exon (ENSRNOT00000080935, exon 2 of 10)	223	ENSRNOT00000080935	ENSRNOG00000059008	ENSRNOT00000080935			Socs7			protein_coding
NA_peak_1246	15	120328	120328	+	1319726	NA	promoter-TSS (ENSRNOT00000007828)	protein_coding-promoter-TSS (ENSRNOT00000007828)	-44	ENSRNOT00000007828	ENSRNOG00000005783	ENSRNOT00000007828			Dlg5			protein_coding
NA_peak_3885	9	113515723	113515723	+	1319726	NA	Intergenic	Intergenic	-11118	ENSRNOT00000067974	ENSRNOG00000042189	ENSRNOT00000067974			Rab31			protein_coding
NA_peak_69	1	72311740	72311740	+	1319726	NA	TTS (ENSRNOT00000021391)	protein_coding-TTS (ENSRNOT00000021391)	116	ENSRNOT00000021286	ENSRNOG00000015753	ENSRNOT00000021286			Epn1			protein_coding
NA_peak_115	1	90246109	90246109	+	1319726	NA	exon (ENSRNOT00000030186, exon 1 of 10)	protein_coding-exon (ENSRNOT00000030186, exon 1 of 10)	156	ENSRNOT00000078585	ENSRNOG00000021133	ENSRNOT00000030186			Lsm14a			protein_coding
NA_peak_3560	8	47393767	47393767	+	1319726	NA	promoter-TSS (ENSRNOT00000059868)	protein_coding-promoter-TSS (ENSRNOT00000059868)	-264	ENSRNOT00000059868	ENSRNOG00000008924	ENSRNOT00000081007			Arhgef12			protein_coding
NA_peak_2413	3	122976183	122976183	+	1319726	NA	promoter-TSS (ENSRNOT00000055801)	protein_coding-promoter-TSS (ENSRNOT00000055801)	79	ENSRNOT00000055801	ENSRNOG00000021223	ENSRNOT00000055801			Ptpra			protein_coding
NA_peak_3598	8	61659085	61659085	+	1319726	NA	promoter-TSS (ENSRNOT00000023831)	protein_coding-promoter-TSS (ENSRNOT00000023831)	-360	ENSRNOT00000023831	ENSRNOG00000017600	ENSRNOT00000091128			Ptpn9			protein_coding
NA_peak_2272	3	11165859	11165859	+	1319726	NA	Intergenic	Intergenic	-32542	ENSRNOT00000088576	ENSRNOG00000010217	ENSRNOT00000013546			Prrc2b			protein_coding
NA_peak_3794	9	45901485	45901485	+	1319726	NA	promoter-TSS (ENSRNOT00000059571)	protein_coding-promoter-TSS (ENSRNOT00000059571)	-256	ENSRNOT00000059571	ENSRNOG00000013408	ENSRNOT00000059571			Npas2			protein_coding
NA_peak_824	11	83546471	83546471	+	1319726	NA	exon (ENSRNOT00000044896, exon 1 of 17)	protein_coding-exon (ENSRNOT00000044896, exon 1 of 17)	203	ENSRNOT00000044896	ENSRNOG00000031801	ENSRNOT00000044896			Ephb3			protein_coding
NA_peak_1445	16	60925430	60925430	+	1319726	NA	exon (ENSRNOT00000015813, exon 1 of 27)	protein_coding-exon (ENSRNOT00000015813, exon 1 of 27)	337	ENSRNOT00000015813	ENSRNOG00000011625	ENSRNOT00000015813			Tnks			protein_coding
NA_peak_1805	19	43967283	43967283	+	1319726	NA	Intergenic	Intergenic	-11500	ENSRNOT00000041815	ENSRNOG00000019253	ENSRNOT00000058891			Bcar1			protein_coding
NA_peak_3634	8	76400560	76400560	+	1319726	NA	exon (ENSRNOT00000081072, exon 1 of 9)	protein_coding-exon (ENSRNOT00000081072, exon 1 of 9)	187	ENSRNOT00000081072	ENSRNOG00000056024	ENSRNOT00000081072			Bnip2			protein_coding
NA_peak_389	1	261337808	261337808	+	1319726	NA	exon (ENSRNOT00000019874, exon 1 of 9)	protein_coding-exon (ENSRNOT00000019874, exon 1 of 9)	214	ENSRNOT00000019874	ENSRNOG00000014675	ENSRNOT00000019874			Pi4k2a			protein_coding
NA_peak_1673	18	44468645	44468645	+	1319726	NA	promoter-TSS (ENSRNOT00000031812)	protein_coding-promoter-TSS (ENSRNOT00000031812)	-139	ENSRNOT00000031812	ENSRNOG00000024671	ENSRNOT00000031812			Dmxl1			protein_coding
NA_peak_941	12	40417683	40417683	+	1319726	NA	promoter-TSS (ENSRNOT00000072481)	protein_coding-promoter-TSS (ENSRNOT00000072481)	-29	ENSRNOT00000072481	ENSRNOG00000046497	ENSRNOT00000072481			Brap			protein_coding
NA_peak_1396	16	19127983	19127983	+	1302730	NA	intron (ENSRNOT00000018960, intron 1 of 23)	protein_coding-intron (ENSRNOT00000018960, intron 1 of 23)	259	ENSRNOT00000018960	ENSRNOG00000013502	ENSRNOT00000018960			Eps15l1			protein_coding
NA_peak_3503	7	141325936	141325936	+	1297406	NA	promoter-TSS (ENSRNOT00000088191)	protein_coding-promoter-TSS (ENSRNOT00000088191)	-385	ENSRNOT00000088191	ENSRNOG00000059765	ENSRNOT00000084075			Asic1			protein_coding
NA_peak_2801	5	60900697	60900697	+	1297406	NA	exon (ENSRNOT00000016384, exon 1 of 7)	protein_coding-exon (ENSRNOT00000016384, exon 1 of 7)	247	ENSRNOT00000016384	ENSRNOG00000011655	ENSRNOT00000016384			Dcaf10			protein_coding
NA_peak_440	10	10725010	10725010	+	1297406	NA	promoter-TSS (ENSRNOT00000004159)	protein_coding-promoter-TSS (ENSRNOT00000004159)	645	ENSRNOT00000061236	ENSRNOG00000003019	ENSRNOT00000061236			Ubn1			protein_coding
NA_peak_316	1	222292892	222292892	+	1297406	NA	intron (ENSRNOT00000028743, intron 1 of 13)	protein_coding-intron (ENSRNOT00000028743, intron 1 of 13)	256	ENSRNOT00000028743	ENSRNOG00000021164	ENSRNOT00000028743			Stip1			protein_coding
NA_peak_2353	3	71020715	71020715	+	1297406	NA	intron (ENSRNOT00000007276, intron 1 of 9)	protein_coding-intron (ENSRNOT00000007276, intron 1 of 9)	181	ENSRNOT00000007276	ENSRNOG00000005256	ENSRNOT00000007276			Zc3h15			protein_coding
NA_peak_630	10	86098634	86098634	+	1294457	NA	promoter-TSS (ENSRNOT00000067317)	protein_coding-promoter-TSS (ENSRNOT00000067317)	60	ENSRNOT00000067317	ENSRNOG00000005081	ENSRNOT00000067317			Fbxl20			protein_coding
NA_peak_920	12	37211350	37211350	+	1294457	NA	promoter-TSS (ENSRNOT00000032739)	protein_coding-promoter-TSS (ENSRNOT00000032739)	34	ENSRNOT00000032739	ENSRNOG00000021691	ENSRNOT00000032739			Ccdc92			protein_coding
NA_peak_1008	13	53507107	53507107	+	1283305	NA	intron (ENSRNOT00000088133, intron 1 of 5)	protein_coding-intron (ENSRNOT00000088133, intron 1 of 5)	182	ENSRNOT00000088133	ENSRNOG00000058643	ENSRNOT00000088133			Zfp281			protein_coding
NA_peak_2358	3	79570893	79570893	+	1282913	NA	exon (ENSRNOT00000009687, exon 1 of 17)	protein_coding-exon (ENSRNOT00000009687, exon 1 of 17)	233	ENSRNOT00000009687	ENSRNOG00000007241	ENSRNOT00000078278			Fnbp4			protein_coding
NA_peak_3717	8	126249062	126249062	+	1282913	NA	Intergenic	Intergenic	11776	ENSRNOT00000087790	ENSRNOG00000059340	ENSRNOT00000087790			AABR07071659.3			lincRNA
NA_peak_356	1	246111391	246111391	+	1282913	NA	Intergenic	Intergenic	-1173	ENSRNOT00000077544	ENSRNOG00000014486	ENSRNOT00000077544			Rfx3			protein_coding
NA_peak_2499	3	164366472	164366472	+	1282913	NA	intron (ENSRNOT00000035048, intron 1 of 3)	protein_coding-intron (ENSRNOT00000035048, intron 1 of 3)	212	ENSRNOT00000035048	ENSRNOG00000025580	ENSRNOT00000035048			LOC100912618			protein_coding
NA_peak_1758	19	24831313	24831313	+	1282913	NA	exon (ENSRNOT00000005770, exon 1 of 22)	protein_coding-exon (ENSRNOT00000005770, exon 1 of 22)	187	ENSRNOT00000005770	ENSRNOG00000004131	ENSRNOT00000005770			Pkn1			protein_coding
NA_peak_3490	7	139734458	139734458	+	1282913	NA	intron (ENSRNOT00000079377, intron 1 of 3)	protein_coding-intron (ENSRNOT00000079377, intron 1 of 3)	110	ENSRNOT00000079377	ENSRNOG00000010099	ENSRNOT00000079377			Asb8			protein_coding
NA_peak_2674	4	122282761	122282761	+	1282913	NA	exon (ENSRNOT00000038244, exon 2 of 11)	protein_coding-exon (ENSRNOT00000038244, exon 2 of 11)	482	ENSRNOT00000038244	ENSRNOG00000025818	ENSRNOT00000038244			Zxdc			protein_coding
NA_peak_3392	7	98302905	98302905	+	1282913	NA	promoter-TSS (ENSRNOT00000011797)	protein_coding-promoter-TSS (ENSRNOT00000011797)	-48	ENSRNOT00000011797	ENSRNOG00000008271	ENSRNOT00000011797			Fam91a1			protein_coding
NA_peak_839	11	87204566	87204566	+	1282913	NA	intron (ENSRNOT00000000306, intron 1 of 8)	protein_coding-intron (ENSRNOT00000000306, intron 1 of 8)	391	ENSRNOT00000000306	ENSRNOG00000038001	ENSRNOT00000000306			Slc25a1			protein_coding
NA_peak_2684	4	129544428	129544428	+	1282913	NA	promoter-TSS (ENSRNOT00000083461)	protein_coding-promoter-TSS (ENSRNOT00000083461)	1	ENSRNOT00000091507	ENSRNOG00000056462	ENSRNOT00000091507			Tmf1			protein_coding
NA_peak_2063	2	211831710	211831710	+	1282913	NA	promoter-TSS (ENSRNOT00000039225)	protein_coding-promoter-TSS (ENSRNOT00000039225)	-74	ENSRNOT00000090561	ENSRNOG00000027540	ENSRNOT00000090561			Fam102b			protein_coding
NA_peak_3243	6	137995084	137995084	+	1273740	NA	Intergenic	Intergenic	-2251	ENSRNOT00000006872	ENSRNOG00000005174	ENSRNOT00000006872			Tmem121			protein_coding
NA_peak_2172	20	20712365	20712365	+	1273740	NA	intron (ENSRNOT00000000784, intron 1 of 12)	protein_coding-intron (ENSRNOT00000000784, intron 1 of 12)	763	ENSRNOT00000000784	ENSRNOG00000000633	ENSRNOT00000000784			Rhobtb1			protein_coding
NA_peak_1343	15	61772466	61772466	+	1273569	NA	promoter-TSS (ENSRNOT00000015605)	protein_coding-promoter-TSS (ENSRNOT00000015605)	50	ENSRNOT00000093399	ENSRNOG00000011678	ENSRNOT00000093399			Wbp4			protein_coding
NA_peak_1014	13	68858601	68858601	+	1273569	NA	exon (ENSRNOT00000065944, exon 1 of 6)	protein_coding-exon (ENSRNOT00000065944, exon 1 of 6)	180	ENSRNOT00000065944	ENSRNOG00000002454	ENSRNOT00000065944			Rnf2			protein_coding
NA_peak_855	12	6386101	6386101	+	1260885	NA	Intergenic	Intergenic	-3109	ENSRNOT00000089117	ENSRNOG00000055643	ENSRNOT00000089117			AABR07035185.1			snoRNA
NA_peak_1017	13	69797948	69797948	+	1260885	NA	promoter-TSS (ENSRNOT00000030109)	protein_coding-promoter-TSS (ENSRNOT00000030109)	68	ENSRNOT00000030109	ENSRNOG00000028207	ENSRNOT00000030109			Colgalt2			protein_coding
NA_peak_3669	8	104542095	104542095	+	1260885	NA	intron (ENSRNOT00000016327, intron 1 of 23)	protein_coding-intron (ENSRNOT00000016327, intron 1 of 23)	222	ENSRNOT00000016327	ENSRNOG00000011909	ENSRNOT00000016327			Rasa2			protein_coding
NA_peak_133	1	101852846	101852846	+	1260885	NA	exon (ENSRNOT00000028615, exon 2 of 13)	protein_coding-exon (ENSRNOT00000028615, exon 2 of 13)	209	ENSRNOT00000084869	ENSRNOG00000021063	ENSRNOT00000028615			Grin2d			protein_coding
NA_peak_2309	3	44551735	44551735	+	1260885	NA	Intergenic	Intergenic	-28805	ENSRNOT00000006963	ENSRNOG00000005033	ENSRNOT00000087071			Acvr1			protein_coding
NA_peak_1451	16	69132639	69132639	+	1260885	NA	promoter-TSS (ENSRNOT00000017776)	protein_coding-promoter-TSS (ENSRNOT00000017776)	-55	ENSRNOT00000017776	ENSRNOG00000012991	ENSRNOT00000017776			Adgra2			protein_coding
NA_peak_2859	5	118347879	118347879	+	1260885	NA	Intergenic	Intergenic	-70920	ENSRNOT00000012052	ENSRNOG00000009045	ENSRNOT00000012052			Alg6			protein_coding
NA_peak_1602	17	85355800	85355800	+	1260885	NA	promoter-TSS (ENSRNOT00000022201)	protein_coding-promoter-TSS (ENSRNOT00000022201)	-242	ENSRNOT00000022201	ENSRNOG00000016383	ENSRNOT00000022201			Commd3			protein_coding
NA_peak_481	10	29122723	29122723	+	1260885	NA	promoter-TSS (ENSRNOT00000005171)	protein_coding-promoter-TSS (ENSRNOT00000005171)	-550	ENSRNOT00000005171	ENSRNOG00000003893	ENSRNOT00000005171			Ccnjl			protein_coding
NA_peak_2981	5	154832291	154832291	+	1260885	NA	Intergenic	Intergenic	11866	ENSRNOT00000034353	ENSRNOG00000022457	ENSRNOT00000034353			AABR07050176.1			pseudogene
NA_peak_601	10	73278623	73278623	+	1260885	NA	promoter-TSS (ENSRNOT00000004698)	protein_coding-promoter-TSS (ENSRNOT00000004698)	-496	ENSRNOT00000004698	ENSRNOG00000003517	ENSRNOT00000004698			Tbx2			protein_coding
NA_peak_2079	2	230356786	230356786	+	1260885	NA	exon (ENSRNOT00000038509, exon 1 of 24)	protein_coding-exon (ENSRNOT00000038509, exon 1 of 24)	133	ENSRNOT00000038509	ENSRNOG00000023373	ENSRNOT00000038509			Sec24b			protein_coding
NA_peak_2956	5	151238673	151238673	+	1260885	NA	intron (ENSRNOT00000067939, intron 1 of 5)	protein_coding-intron (ENSRNOT00000067939, intron 1 of 5)	27331	ENSRNOT00000067939	ENSRNOG00000042855	ENSRNOT00000067939			Ahdc1			protein_coding
NA_peak_35	1	32297002	32297002	+	1260885	NA	exon (ENSRNOT00000023211, exon 1 of 17)	protein_coding-exon (ENSRNOT00000023211, exon 1 of 17)	188	ENSRNOT00000023211	ENSRNOG00000016923	ENSRNOT00000023211			Clptm1l			protein_coding
NA_peak_1093	14	3506642	3506642	+	1260885	NA	exon (ENSRNOT00000002867, exon 1 of 17)	protein_coding-exon (ENSRNOT00000002867, exon 1 of 17)	303	ENSRNOT00000002867	ENSRNOG00000002093	ENSRNOT00000002867			Tgfbr3			protein_coding
NA_peak_2227	3	2625098	2625098	+	1260885	NA	promoter-TSS (ENSRNOT00000018927)	protein_coding-promoter-TSS (ENSRNOT00000018927)	83	ENSRNOT00000018927	ENSRNOG00000013895	ENSRNOT00000018927			Npdc1			protein_coding
NA_peak_3031	5	169357258	169357258	+	1260885	NA	promoter-TSS (ENSRNOT00000000079)	protein_coding-promoter-TSS (ENSRNOT00000000079)	-259	ENSRNOT00000000079	ENSRNOG00000010580	ENSRNOT00000014213			Acot7			protein_coding
NA_peak_369	1	251421172	251421172	+	1260885	NA	promoter-TSS (ENSRNOT00000028143)	protein_coding-promoter-TSS (ENSRNOT00000028143)	-424	ENSRNOT00000028143	ENSRNOG00000020723	ENSRNOT00000028143			Pten			protein_coding
NA_peak_1336	15	57805082	57805082	+	1260885	NA	exon (ENSRNOT00000000168, exon 1 of 23)	protein_coding-exon (ENSRNOT00000000168, exon 1 of 23)	102	ENSRNOT00000000168	ENSRNOG00000000155	ENSRNOT00000000168			Cog3			protein_coding
NA_peak_1955	2	118745943	118745943	+	1260885	NA	promoter-TSS (ENSRNOT00000013858)	protein_coding-promoter-TSS (ENSRNOT00000013858)	-177	ENSRNOT00000013858	ENSRNOG00000010119	ENSRNOT00000013858			Zmat3			protein_coding
NA_peak_1857	19	61677806	61677806	+	1260885	NA	intron (ENSRNOT00000014785, intron 1 of 15)	protein_coding-intron (ENSRNOT00000014785, intron 1 of 15)	264	ENSRNOT00000014785	ENSRNOG00000010966	ENSRNOT00000014785			Itgb1			protein_coding
NA_peak_411	1	273856933	273856933	+	1260885	NA	intron (ENSRNOT00000086496, intron 1 of 14)	protein_coding-intron (ENSRNOT00000017600, intron 1 of 13)	2591	ENSRNOT00000086496	ENSRNOG00000012820	ENSRNOT00000044827			Add3			protein_coding
NA_peak_3707	8	119566395	119566395	+	1260885	NA	promoter-TSS (ENSRNOT00000028633)	protein_coding-promoter-TSS (ENSRNOT00000028633)	-114	ENSRNOT00000028633	ENSRNOG00000021091	ENSRNOT00000028633			Trank1			protein_coding
NA_peak_1012	13	60496417	60496417	+	1260885	NA	promoter-TSS (ENSRNOT00000004495)	protein_coding-promoter-TSS (ENSRNOT00000004495)	94	ENSRNOT00000004495	ENSRNOG00000003258	ENSRNOT00000004495			Cdc73			protein_coding
NA_peak_2073	2	225388991	225388991	+	1260885	NA	exon (ENSRNOT00000016739, exon 1 of 23)	protein_coding-exon (ENSRNOT00000016739, exon 1 of 23)	129	ENSRNOT00000016739	ENSRNOG00000011929	ENSRNOT00000016739			Abcd3			protein_coding
NA_peak_3333	7	51515346	51515346	+	1260885	NA	promoter-TSS (ENSRNOT00000006773)	protein_coding-promoter-TSS (ENSRNOT00000006773)	27	ENSRNOT00000080285	ENSRNOG00000004925	ENSRNOT00000006773			Ppp1r12a			protein_coding
NA_peak_408	1	267245860	267245860	+	1260885	NA	promoter-TSS (ENSRNOT00000082799)	protein_coding-promoter-TSS (ENSRNOT00000082799)	-224	ENSRNOT00000082799	ENSRNOG00000020353	ENSRNOT00000027574			Sh3pxd2a			protein_coding
NA_peak_809	11	74368493	74368493	+	1260885	NA	Intergenic	Intergenic	-53245	ENSRNOT00000002346	ENSRNOG00000001720	ENSRNOT00000002346			Hes1			protein_coding
NA_peak_471	10	15672609	15672609	+	1260885	NA	intron (ENSRNOT00000027965, intron 1 of 17)	protein_coding-intron (ENSRNOT00000027965, intron 1 of 17)	227	ENSRNOT00000027965	ENSRNOG00000020594	ENSRNOT00000027965			Rhbdf1			protein_coding
NA_peak_3716	8	124398667	124398667	+	1259548	NA	exon (ENSRNOT00000037883, exon 1 of 7)	protein_coding-exon (ENSRNOT00000037883, exon 1 of 7)	827	ENSRNOT00000037883	ENSRNOG00000013265	ENSRNOT00000037883			Tgfbr2			protein_coding
NA_peak_2419	3	124069066	124069066	+	1259548	NA	intron (ENSRNOT00000079264, intron 1 of 5)	protein_coding-intron (ENSRNOT00000079264, intron 1 of 5)	201	ENSRNOT00000079264	ENSRNOG00000021255	ENSRNOT00000028876			Smox			protein_coding
NA_peak_1502	17	9463849	9463849	+	1259548	NA	promoter-TSS (ENSRNOT00000078596)	lincRNA-promoter-TSS (ENSRNOT00000078596)	-217	ENSRNOT00000078596	ENSRNOG00000054147	ENSRNOT00000078596			AC139608.1			lincRNA
NA_peak_1409	16	20486435	20486435	+	1259548	NA	exon (ENSRNOT00000026470, exon 1 of 1)	protein_coding-exon (ENSRNOT00000026470, exon 1 of 1)	272	ENSRNOT00000026470	ENSRNOG00000019568	ENSRNOT00000026470			Jund			protein_coding
NA_peak_2876	5	128392446	128392446	+	1259548	NA	promoter-TSS (ENSRNOT00000075394)	pseudogene-promoter-TSS (ENSRNOT00000075394)	94	ENSRNOT00000075394	ENSRNOG00000049469	ENSRNOT00000075394			AABR07049554.2			pseudogene
NA_peak_348	1	241501974	241501974	+	1259105	NA	intron (ENSRNOT00000054775, intron 1 of 6)	protein_coding-intron (ENSRNOT00000054775, intron 1 of 6)	295	ENSRNOT00000054775	ENSRNOG00000014891	ENSRNOT00000054775			Ptar1			protein_coding
NA_peak_3538	8	22459142	22459142	+	1252096	NA	exon (ENSRNOT00000010947, exon 1 of 21)	protein_coding-exon (ENSRNOT00000010947, exon 1 of 21)	146	ENSRNOT00000065028	ENSRNOG00000007649	ENSRNOT00000065028			Dnm2			protein_coding
NA_peak_2993	5	157423225	157423225	+	1252096	NA	promoter-TSS (ENSRNOT00000023431)	protein_coding-promoter-TSS (ENSRNOT00000023431)	12	ENSRNOT00000023431	ENSRNOG00000017401	ENSRNOT00000023431			Tmco4			protein_coding
NA_peak_3590	8	59710833	59710833	+	1252096	NA	promoter-TSS (ENSRNOT00000019539)	protein_coding-promoter-TSS (ENSRNOT00000019539)	-716	ENSRNOT00000019539	ENSRNOG00000014529	ENSRNOT00000019539			Ube2q2			protein_coding
NA_peak_1151	14	44413772	44413772	+	1252096	NA	intron (ENSRNOT00000003552, intron 1 of 4)	protein_coding-intron (ENSRNOT00000003552, intron 1 of 4)	136	ENSRNOT00000003552	ENSRNOG00000002553	ENSRNOT00000003552			Smim14			protein_coding
NA_peak_2443	3	148722673	148722673	+	1247100	NA	promoter-TSS (ENSRNOT00000013730)	protein_coding-promoter-TSS (ENSRNOT00000013730)	37	ENSRNOT00000090919	ENSRNOG00000010086	ENSRNOT00000068592			Plagl2			protein_coding
NA_peak_2142	20	7208108	7208108	+	1247100	NA	exon (ENSRNOT00000083169, exon 1 of 5)	protein_coding-exon (ENSRNOT00000083169, exon 1 of 5)	184	ENSRNOT00000083169	ENSRNOG00000061176	ENSRNOT00000083169			Nudt3			protein_coding
NA_peak_746	11	31213597	31213597	+	1247100	NA	exon (ENSRNOT00000002800, exon 1 of 18)	protein_coding-exon (ENSRNOT00000002800, exon 1 of 18)	190	ENSRNOT00000002800	ENSRNOG00000002036	ENSRNOT00000002800			Paxbp1			protein_coding
NA_peak_2543	4	7095890	7095890	+	1233241	NA	intron (ENSRNOT00000066598, intron 2 of 13)	protein_coding-intron (ENSRNOT00000066598, intron 2 of 13)	12945	ENSRNOT00000062099	ENSRNOG00000040346	ENSRNOT00000062099			Mir671			miRNA
NA_peak_868	12	12855427	12855427	+	1215596	NA	Intergenic	Intergenic	-4234	ENSRNOT00000001404	ENSRNOG00000001059	ENSRNOT00000001404			Usp42			protein_coding
NA_peak_2941	5	147952953	147952953	+	1215596	NA	exon (ENSRNOT00000075270, exon 1 of 9)	protein_coding-exon (ENSRNOT00000075270, exon 1 of 9)	140	ENSRNOT00000075270	ENSRNOG00000046794	ENSRNOT00000075270			Khdrbs1			protein_coding
NA_peak_995	13	48790425	48790425	+	1215596	NA	promoter-TSS (ENSRNOT00000065094)	protein_coding-promoter-TSS (ENSRNOT00000065094)	-84	ENSRNOT00000065094	ENSRNOG00000007887	ENSRNOT00000087504			Elk4			protein_coding
NA_peak_540	10	54011123	54011123	+	1215596	NA	Intergenic	Intergenic	88925	ENSRNOT00000079764	ENSRNOG00000052646	ENSRNOT00000079764			AABR07029836.1			protein_coding
NA_peak_1779	19	37127810	37127810	+	1215596	NA	exon (ENSRNOT00000019656, exon 1 of 6)	protein_coding-exon (ENSRNOT00000019656, exon 1 of 6)	302	ENSRNOT00000019656	ENSRNOG00000014647	ENSRNOT00000019656			Cbfb			protein_coding
NA_peak_3065	6	6842989	6842989	+	1215596	NA	promoter-TSS (ENSRNOT00000006094)	protein_coding-promoter-TSS (ENSRNOT00000006094)	-231	ENSRNOT00000006094	ENSRNOG00000004535	ENSRNOT00000006094			Kcng3			protein_coding
NA_peak_2950	5	150323097	150323097	+	1215596	NA	promoter-TSS (ENSRNOT00000014084)	protein_coding-promoter-TSS (ENSRNOT00000014084)	-34	ENSRNOT00000014084	ENSRNOG00000010531	ENSRNOT00000014084			Oprd1			protein_coding
NA_peak_979	12	51694407	51694407	+	1215596	NA	intron (ENSRNOT00000046920, intron 1 of 21)	protein_coding-intron (ENSRNOT00000046920, intron 1 of 21)	8323	ENSRNOT00000046920	ENSRNOG00000032590	ENSRNOT00000046920			Ttc28			protein_coding
NA_peak_588	10	65780497	65780497	+	1215596	NA	promoter-TSS (ENSRNOT00000013100)	protein_coding-promoter-TSS (ENSRNOT00000013100)	3	ENSRNOT00000013100	ENSRNOG00000009252	ENSRNOT00000013100			Poldip2			protein_coding
NA_peak_2823	5	74190972	74190972	+	1215596	NA	promoter-TSS (ENSRNOT00000090366)	protein_coding-promoter-TSS (ENSRNOT00000090366)	19	ENSRNOT00000090366	ENSRNOG00000056550	ENSRNOT00000088169			Epb41l4b			protein_coding
NA_peak_2386	3	108795225	108795225	+	1215596	NA	promoter-TSS (ENSRNOT00000007028)	protein_coding-promoter-TSS (ENSRNOT00000007028)	-10	ENSRNOT00000007028	ENSRNOG00000005209	ENSRNOT00000007028			Spred1			protein_coding
NA_peak_2511	3	172420665	172420665	+	1215596	NA	promoter-TSS (ENSRNOT00000071215)	protein_coding-promoter-TSS (ENSRNOT00000071215)	74	ENSRNOT00000071215	ENSRNOG00000047374	ENSRNOT00000071215			Gnas			protein_coding
NA_peak_3423	7	120125635	120125635	+	1215596	NA	promoter-TSS (ENSRNOT00000012480)	protein_coding-promoter-TSS (ENSRNOT00000012480)	2	ENSRNOT00000012480	ENSRNOG00000009360	ENSRNOT00000012480			Sh3bp1			protein_coding
NA_peak_89	1	80629914	80629914	+	1215596	NA	exon (ENSRNOT00000025281, exon 1 of 9)	protein_coding-exon (ENSRNOT00000025281, exon 1 of 9)	124	ENSRNOT00000025281	ENSRNOG00000018556	ENSRNOT00000025281			Tomm40			protein_coding
NA_peak_2360	3	79743133	79743133	+	1215596	NA	exon (ENSRNOT00000013584, exon 1 of 4)	protein_coding-exon (ENSRNOT00000013584, exon 1 of 4)	604	ENSRNOT00000013584	ENSRNOG00000009723	ENSRNOT00000013584			Ptpmt1			protein_coding
NA_peak_1380	16	6610534	6610534	+	1215596	NA	intron (ENSRNOT00000021862, intron 2 of 14)	protein_coding-intron (ENSRNOT00000021862, intron 2 of 14)	866	ENSRNOT00000021862	ENSRNOG00000016064	ENSRNOT00000021862			Tkt			protein_coding
NA_peak_479	10	20591466	20591466	+	1215596	NA	promoter-TSS (ENSRNOT00000059780)	protein_coding-promoter-TSS (ENSRNOT00000059780)	34	ENSRNOT00000059780	ENSRNOG00000007419	ENSRNOT00000059780			Pank3			protein_coding
NA_peak_1122	14	18720214	18720214	+	1215596	NA	exon (ENSRNOT00000047708, exon 1 of 8)	protein_coding-exon (ENSRNOT00000047708, exon 1 of 8)	143	ENSRNOT00000047708	ENSRNOG00000021347	ENSRNOT00000081455			Mthfd2l			protein_coding
NA_peak_1352	15	89338967	89338967	+	1215596	NA	promoter-TSS (ENSRNOT00000013255)	protein_coding-promoter-TSS (ENSRNOT00000013255)	70	ENSRNOT00000013255	ENSRNOG00000009836	ENSRNOT00000013297			Rbm26			protein_coding
NA_peak_3338	7	59514951	59514951	+	1215596	NA	promoter-TSS (ENSRNOT00000085579)	protein_coding-promoter-TSS (ENSRNOT00000085579)	-12	ENSRNOT00000085579	ENSRNOG00000054458	ENSRNOT00000085579			Kcnmb4			protein_coding
NA_peak_496	10	36741528	36741528	+	1215596	NA	promoter-TSS (ENSRNOT00000064078)	protein_coding-promoter-TSS (ENSRNOT00000064078)	94	ENSRNOT00000064078	ENSRNOG00000003349	ENSRNOT00000064078			LOC103693323			protein_coding
NA_peak_2713	4	153027816	153027816	+	1215596	NA	exon (ENSRNOT00000074558, exon 1 of 1)	protein_coding-exon (ENSRNOT00000074558, exon 1 of 1)	313	ENSRNOT00000074558	ENSRNOG00000046851	ENSRNOT00000074558			Tmem121b			protein_coding
NA_peak_1782	19	37601136	37601136	+	1215596	NA	intron (ENSRNOT00000023853, intron 1 of 11)	protein_coding-intron (ENSRNOT00000023853, intron 1 of 11)	988	ENSRNOT00000023853	ENSRNOG00000017674	ENSRNOT00000023853			Ctcf			protein_coding
NA_peak_3528	8	12927523	12927523	+	1215596	NA	Intergenic	Intergenic	-25261	ENSRNOT00000033969	ENSRNOG00000024757	ENSRNOT00000033969			AABR07069219.1			protein_coding
NA_peak_3571	8	49075689	49075689	+	1215596	NA	intron (ENSRNOT00000082687, intron 1 of 9)	protein_coding-intron (ENSRNOT00000082687, intron 1 of 9)	203	ENSRNOT00000082687	ENSRNOG00000061108	ENSRNOT00000082687			Arcn1			protein_coding
NA_peak_3897	9	119321361	119321361	+	1215596	NA	intron (ENSRNOT00000048125, intron 1 of 3)	protein_coding-intron (ENSRNOT00000048125, intron 1 of 3)	139	ENSRNOT00000048125	ENSRNOG00000015733	ENSRNOT00000048125			Myl12b			protein_coding
NA_peak_2557	4	9921495	9921495	+	1215596	NA	intron (ENSRNOT00000017018, intron 1 of 12)	protein_coding-intron (ENSRNOT00000017018, intron 1 of 12)	115	ENSRNOT00000017018	ENSRNOG00000012693	ENSRNOT00000017018			Pmpcb			protein_coding
NA_peak_1691	18	62965367	62965367	+	1215596	NA	exon (ENSRNOT00000025164, exon 1 of 11)	protein_coding-exon (ENSRNOT00000025164, exon 1 of 11)	171	ENSRNOT00000025164	ENSRNOG00000018648	ENSRNOT00000025164			Mppe1			protein_coding
NA_peak_2456	3	152465259	152465259	+	1215596	NA	TTS (ENSRNOT00000027086)	protein_coding-TTS (ENSRNOT00000027086)	9769	ENSRNOT00000068912	ENSRNOG00000043645	ENSRNOT00000068912			AABR07054401.1			miRNA
NA_peak_2822	5	73986091	73986091	+	1215596	NA	exon (ENSRNOT00000032299, exon 1 of 18)	protein_coding-exon (ENSRNOT00000032299, exon 1 of 18)	282	ENSRNOT00000032299	ENSRNOG00000026271	ENSRNOT00000032299			Tmem245			protein_coding
NA_peak_1635	18	24585232	24585232	+	1215596	NA	intron (ENSRNOT00000017075, intron 1 of 21)	protein_coding-intron (ENSRNOT00000017075, intron 1 of 21)	332	ENSRNOT00000017075	ENSRNOG00000011382	ENSRNOT00000017075			Wdr33			protein_coding
NA_peak_2748	4	182599813	182599813	+	1215596	NA	intron (ENSRNOT00000067970, intron 1 of 11)	protein_coding-intron (ENSRNOT00000067970, intron 1 of 11)	445	ENSRNOT00000067970	ENSRNOG00000001852	ENSRNOT00000067970			Ergic2			protein_coding
NA_peak_790	11	68842984	68842984	+	1215596	NA	promoter-TSS (ENSRNOT00000049180)	protein_coding-promoter-TSS (ENSRNOT00000049180)	-664	ENSRNOT00000049180	ENSRNOG00000002229	ENSRNOT00000049180			Adcy5			protein_coding
NA_peak_3809	9	61529600	61529600	+	1215596	NA	promoter-TSS (ENSRNOT00000015432)	protein_coding-promoter-TSS (ENSRNOT00000015432)	-718	ENSRNOT00000015432	ENSRNOG00000021384	ENSRNOT00000078800			Ankrd44			protein_coding
NA_peak_3894	9	117538484	117538484	+	1215596	NA	intron (ENSRNOT00000022878, intron 1 of 23)	protein_coding-intron (ENSRNOT00000022849, intron 1 of 22)	138	ENSRNOT00000022849	ENSRNOG00000016724	ENSRNOT00000049426			Epb41l3			protein_coding
NA_peak_1488	17	5226063	5226063	+	1215596	NA	exon (ENSRNOT00000022373, exon 1 of 27)	protein_coding-exon (ENSRNOT00000022373, exon 1 of 27)	228	ENSRNOT00000022373	ENSRNOG00000016629	ENSRNOT00000022373			Tut7			protein_coding
NA_peak_1373	16	2226513	2226513	+	1215596	NA	promoter-TSS (ENSRNOT00000091513)	protein_coding-promoter-TSS (ENSRNOT00000091513)	-392	ENSRNOT00000091513	ENSRNOG00000011307	ENSRNOT00000091513			Slmap			protein_coding
NA_peak_420	1	277637311	277637311	+	1215596	NA	Intergenic	Intergenic	-4201	ENSRNOT00000084861	ENSRNOG00000017064	ENSRNOT00000084861			Tdrd1			protein_coding
NA_peak_3359	7	69213386	69213386	+	1215596	NA	exon (ENSRNOT00000032786, exon 1 of 19)	protein_coding-exon (ENSRNOT00000032786, exon 1 of 19)	239	ENSRNOT00000032786	ENSRNOG00000007654	ENSRNOT00000032786			Lrig3			protein_coding
NA_peak_3286	7	12457060	12457060	+	1215596	NA	exon (ENSRNOT00000060683, exon 1 of 10)	protein_coding-exon (ENSRNOT00000060683, exon 1 of 10)	453	ENSRNOT00000060683	ENSRNOG00000014287	ENSRNOT00000060683			Stk11			protein_coding
NA_peak_2969	5	152920734	152920734	+	1215596	NA	promoter-TSS (ENSRNOT00000022956)	protein_coding-promoter-TSS (ENSRNOT00000022956)	-391	ENSRNOT00000022956	ENSRNOG00000017087	ENSRNOT00000022956			Man1c1			protein_coding
NA_peak_2851	5	107178299	107178299	+	1215596	NA	Intergenic	Intergenic	28327	ENSRNOT00000053729	ENSRNOG00000035606	ENSRNOT00000053729			Mir3554			miRNA
NA_peak_301	1	220836362	220836362	+	1215596	NA	intron (ENSRNOT00000071617, intron 1 of 1)	pseudogene-intron (ENSRNOT00000071617, intron 1 of 1)	142	ENSRNOT00000071617	ENSRNOG00000046560	ENSRNOT00000071617			AC109096.1			pseudogene
NA_peak_80	1	78740343	78740343	+	1215596	NA	exon (ENSRNOT00000021976, exon 1 of 18)	protein_coding-exon (ENSRNOT00000021976, exon 1 of 18)	413	ENSRNOT00000021976	ENSRNOG00000016145	ENSRNOT00000089715			Strn4			protein_coding
NA_peak_1059	13	99103393	99103393	+	1215596	NA	Intergenic	Intergenic	-2185	ENSRNOT00000004329	ENSRNOG00000003220	ENSRNOT00000004329			H3f3b			protein_coding
NA_peak_344	1	236031945	236031945	+	1215596	NA	promoter-TSS (ENSRNOT00000016164)	protein_coding-promoter-TSS (ENSRNOT00000016164)	-43	ENSRNOT00000016164	ENSRNOG00000012036	ENSRNOT00000016164			Pcsk5			protein_coding
NA_peak_1299	15	37926651	37926651	+	1215596	NA	promoter-TSS (ENSRNOT00000013901)	protein_coding-promoter-TSS (ENSRNOT00000013901)	64	ENSRNOT00000013901	ENSRNOG00000010137	ENSRNOT00000013901			Xpo4			protein_coding
NA_peak_795	11	71107960	71107960	+	1215596	NA	exon (ENSRNOT00000051989, exon 1 of 22)	protein_coding-exon (ENSRNOT00000051989, exon 1 of 22)	224	ENSRNOT00000073865	ENSRNOG00000001774	ENSRNOT00000051989			Lrch3			protein_coding
NA_peak_763	11	42895819	42895819	+	1215596	NA	Intergenic	Intergenic	37341	ENSRNOT00000002293	ENSRNOG00000001689	ENSRNOT00000002293			Arl6			protein_coding
NA_peak_1134	14	34040783	34040783	+	1215596	NA	Intergenic	Intergenic	-63506	ENSRNOT00000002890	ENSRNOG00000046308	ENSRNOT00000002890			LOC100910308			protein_coding
NA_peak_1563	17	45625942	45625942	+	1215596	NA	exon (ENSRNOT00000077363, exon 1 of 8)	protein_coding-exon (ENSRNOT00000077363, exon 1 of 8)	270	ENSRNOT00000077363	ENSRNOG00000055917	ENSRNOT00000077363			Trim27			protein_coding
NA_peak_3180	6	107429171	107429171	+	1215596	NA	exon (ENSRNOT00000013431, exon 1 of 1)	protein_coding-exon (ENSRNOT00000013431, exon 1 of 1)	663	ENSRNOT00000013431	ENSRNOG00000010126	ENSRNOT00000013431			Riox1			protein_coding
NA_peak_1274	15	23665184	23665184	+	1215596	NA	promoter-TSS (ENSRNOT00000089226)	protein_coding-promoter-TSS (ENSRNOT00000089226)	-18	ENSRNOT00000089226	ENSRNOG00000010489	ENSRNOT00000092091			Samd4a			protein_coding
NA_peak_2846	5	99566310	99566310	+	1215596	NA	promoter-TSS (ENSRNOT00000051028)	protein_coding-promoter-TSS (ENSRNOT00000051028)	7	ENSRNOT00000051028	ENSRNOG00000007894	ENSRNOT00000051028			Mpdz			protein_coding
NA_peak_2594	4	57019941	57019941	+	1215596	NA	promoter-TSS (ENSRNOT00000011356)	protein_coding-promoter-TSS (ENSRNOT00000011356)	0	ENSRNOT00000011356	ENSRNOG00000008332	ENSRNOT00000080223			Smo			protein_coding
NA_peak_1191	14	82228044	82228044	+	1210931	NA	exon (ENSRNOT00000022540, exon 1 of 14)	protein_coding-exon (ENSRNOT00000022540, exon 1 of 14)	336	ENSRNOT00000022540	ENSRNOG00000016427	ENSRNOT00000022540			Letm1			protein_coding
NA_peak_574	10	63731770	63731770	+	1210931	NA	promoter-TSS (ENSRNOT00000005368)	protein_coding-promoter-TSS (ENSRNOT00000005368)	3	ENSRNOT00000005368	ENSRNOG00000003846	ENSRNOT00000090554			Pitpna			protein_coding
NA_peak_3315	7	31823712	31823712	+	1209524	NA	exon (ENSRNOT00000011494, exon 2 of 8)	protein_coding-exon (ENSRNOT00000011494, exon 2 of 8)	352	ENSRNOT00000011494	ENSRNOG00000008289	ENSRNOT00000080824			Slc25a3			protein_coding
NA_peak_2196	20	34683299	34683299	+	1209524	NA	exon (ENSRNOT00000063920, exon 1 of 13)	protein_coding-exon (ENSRNOT00000063920, exon 1 of 13)	207	ENSRNOT00000063920	ENSRNOG00000000414	ENSRNOT00000087220			Cep85l			protein_coding
NA_peak_3406	7	114889407	114889407	+	1209524	NA	Intergenic	Intergenic	20857	ENSRNOT00000080383	ENSRNOG00000053874	ENSRNOT00000080383			AABR07058410.2			lincRNA
NA_peak_1240	14	113771175	113771175	+	1209524	NA	Intergenic	Intergenic	15990	ENSRNOT00000054489	ENSRNOG00000036370	ENSRNOT00000054489			AABR07016769.1			miRNA
NA_peak_2037	2	198231509	198231509	+	1209524	NA	exon (ENSRNOT00000046739, exon 1 of 12)	protein_coding-exon (ENSRNOT00000046739, exon 1 of 12)	156	ENSRNOT00000046739	ENSRNOG00000042068	ENSRNOT00000078288			Otud7b			protein_coding
NA_peak_3663	8	97646976	97646976	+	1209524	NA	promoter-TSS (ENSRNOT00000030645)	protein_coding-promoter-TSS (ENSRNOT00000030645)	96	ENSRNOT00000030645	ENSRNOG00000014543	ENSRNOT00000030645			Tbc1d2b			protein_coding
NA_peak_2317	3	50121553	50121553	+	1209524	NA	Intergenic	Intergenic	-1161	ENSRNOT00000006175	ENSRNOG00000004679	ENSRNOT00000006175			Fign			protein_coding
NA_peak_2659	4	115453613	115453613	+	1209524	NA	promoter-TSS (ENSRNOT00000065847)	protein_coding-promoter-TSS (ENSRNOT00000065847)	46	ENSRNOT00000065847	ENSRNOG00000013712	ENSRNOT00000065847			Tex261			protein_coding
NA_peak_2761	5	14983475	14983475	+	1209524	NA	exon (ENSRNOT00000049609, exon 1 of 1)	protein_coding-exon (ENSRNOT00000049609, exon 1 of 1)	104	ENSRNOT00000049609	ENSRNOG00000032840	ENSRNOT00000049609			Sumo4			protein_coding
NA_peak_2665	4	118471893	118471893	+	1209524	NA	intron (ENSRNOT00000023856, intron 1 of 5)	protein_coding-intron (ENSRNOT00000023856, intron 1 of 5)	286	ENSRNOT00000023856	ENSRNOG00000017720	ENSRNOT00000023856			Mxd1			protein_coding
NA_peak_2220	3	471425	471425	+	1209524	NA	exon (ENSRNOT00000081816, exon 1 of 12)	protein_coding-exon (ENSRNOT00000081816, exon 1 of 12)	209	ENSRNOT00000081816	ENSRNOG00000005070	ENSRNOT00000033653			Spopl			protein_coding
NA_peak_1517	17	10586174	10586174	+	1209524	NA	intron (ENSRNOT00000023125, intron 1 of 9)	protein_coding-intron (ENSRNOT00000023125, intron 1 of 9)	131	ENSRNOT00000023125	ENSRNOG00000017133	ENSRNOT00000023125			LOC306766			protein_coding
NA_peak_3364	7	70578375	70578375	+	1209524	NA	Intergenic	Intergenic	-1228	ENSRNOT00000008854	ENSRNOG00000006209	ENSRNOT00000008854			Mbd6			protein_coding
NA_peak_1262	15	12570202	12570202	+	1209524	NA	intron (ENSRNOT00000010675, intron 1 of 7)	protein_coding-intron (ENSRNOT00000010675, intron 1 of 7)	140	ENSRNOT00000010675	ENSRNOG00000007701	ENSRNOT00000010675			Thoc7			protein_coding
NA_peak_1656	18	29104128	29104128	+	1209524	NA	Intergenic	Intergenic	-6114	ENSRNOT00000025756	ENSRNOG00000019062	ENSRNOT00000025756			Pura			protein_coding
NA_peak_2122	20	3815751	3815751	+	1209524	NA	promoter-TSS (ENSRNOT00000000543)	protein_coding-promoter-TSS (ENSRNOT00000000543)	83	ENSRNOT00000000543	ENSRNOG00000000467	ENSRNOT00000081085			Ring1			protein_coding
NA_peak_2192	20	32268895	32268895	+	1209524	NA	intron (ENSRNOT00000000446, intron 1 of 14)	protein_coding-intron (ENSRNOT00000000446, intron 1 of 14)	250	ENSRNOT00000000446	ENSRNOG00000000396	ENSRNOT00000000446			Ddx50			protein_coding
NA_peak_3511	7	142719756	142719756	+	1209524	NA	Intergenic	Intergenic	-23409	ENSRNOT00000044982	ENSRNOG00000032026	ENSRNOT00000044982			AABR07058914.1			pseudogene
NA_peak_1565	17	49676342	49676342	+	1209524	NA	Intergenic	Intergenic	-37952	ENSRNOT00000018190	ENSRNOG00000013454	ENSRNOT00000018190			Rala			protein_coding
NA_peak_3943	X	157139164	157139164	+	1209524	NA	exon (ENSRNOT00000092123, exon 1 of 13)	protein_coding-exon (ENSRNOT00000092123, exon 1 of 13)	127	ENSRNOT00000092123	ENSRNOG00000057620	ENSRNOT00000092123			Slc6a8			protein_coding
NA_peak_2506	3	171015684	171015684	+	1209524	NA	promoter-TSS (ENSRNOT00000038182)	protein_coding-promoter-TSS (ENSRNOT00000038182)	67	ENSRNOT00000038182	ENSRNOG00000021295	ENSRNOT00000038182			Rae1			protein_coding
NA_peak_1556	17	36144948	36144948	+	1209524	NA	intron (ENSRNOT00000036978, intron 1 of 12)	protein_coding-intron (ENSRNOT00000036978, intron 1 of 12)	32509	ENSRNOT00000036978	ENSRNOG00000027125	ENSRNOT00000036978			Mboat1			protein_coding
NA_peak_2036	2	198041436	198041436	+	1209524	NA	intron (ENSRNOT00000028744, intron 1 of 6)	protein_coding-intron (ENSRNOT00000028744, intron 1 of 6)	900	ENSRNOT00000028744	ENSRNOG00000021168	ENSRNOT00000028744			Anp32e			protein_coding
NA_peak_1855	19	59873283	59873283	+	1209524	NA	promoter-TSS (ENSRNOT00000086085)	snoRNA-promoter-TSS (ENSRNOT00000086085)	128	ENSRNOT00000027088	ENSRNOG00000019980	ENSRNOT00000027088			Tomm20			protein_coding
NA_peak_725	10	109839658	109839658	+	1209524	NA	TTS (ENSRNOT00000075285)	miRNA-TTS (ENSRNOT00000075285)	389	ENSRNOT00000054947	ENSRNOG00000036680	ENSRNOT00000054947			Notum			protein_coding
NA_peak_2887	5	134927798	134927798	+	1209524	NA	promoter-TSS (ENSRNOT00000016751)	protein_coding-promoter-TSS (ENSRNOT00000016751)	189	ENSRNOT00000018506	ENSRNOG00000013642	ENSRNOT00000018506			Lrrc41			protein_coding
NA_peak_1490	17	5463657	5463657	+	1209524	NA	promoter-TSS (ENSRNOT00000090032)	protein_coding-promoter-TSS (ENSRNOT00000090032)	241	ENSRNOT00000025096	ENSRNOG00000018417	ENSRNOT00000025096			Naa35			protein_coding
NA_peak_2480	3	160934072	160934072	+	1209524	NA	Intergenic	Intergenic	-1637	ENSRNOT00000019688	ENSRNOG00000014571	ENSRNOT00000019688			Dbndd2			protein_coding
NA_peak_270	1	205139017	205139017	+	1209524	NA	Intergenic	Intergenic	-98262	ENSRNOT00000023574	ENSRNOG00000017326	ENSRNOT00000023404			Ctbp2			protein_coding
NA_peak_1728	19	784671	784671	+	1209524	NA	promoter-TSS (ENSRNOT00000014749)	protein_coding-promoter-TSS (ENSRNOT00000014749)	53	ENSRNOT00000014749	ENSRNOG00000011009	ENSRNOT00000014749			Cmtm4			protein_coding
NA_peak_3893	9	117048619	117048619	+	1209524	NA	exon (ENSRNOT00000072916, exon 2 of 2)	protein_coding-exon (ENSRNOT00000072916, exon 2 of 2)	4086	ENSRNOT00000072916	ENSRNOG00000049880	ENSRNOT00000072916			Tmem200c			protein_coding
NA_peak_2236	3	3833969	3833969	+	1209524	NA	promoter-TSS (ENSRNOT00000031607)	protein_coding-promoter-TSS (ENSRNOT00000031607)	-109	ENSRNOT00000031607	ENSRNOG00000026775	ENSRNOT00000031607			Pmpca			protein_coding
NA_peak_78	1	78355109	78355109	+	1209524	NA	exon (ENSRNOT00000020509, exon 1 of 13)	protein_coding-exon (ENSRNOT00000020509, exon 1 of 13)	175	ENSRNOT00000020509	ENSRNOG00000015229	ENSRNOT00000020509			Zc3h4			protein_coding
NA_peak_2181	20	27307874	27307874	+	1209524	NA	TTS (ENSRNOT00000088717)	misc_RNA-TTS (ENSRNOT00000088717)	195	ENSRNOT00000056047	ENSRNOG00000000387	ENSRNOT00000000438			Slc25a16			protein_coding
NA_peak_395	1	264047693	264047693	+	1209524	NA	Intergenic	Intergenic	-11681	ENSRNOT00000075397	ENSRNOG00000046005	ENSRNOT00000075397			Scd2			protein_coding
NA_peak_2408	3	119777166	119777166	+	1209524	NA	exon (ENSRNOT00000018549, exon 1 of 4)	protein_coding-exon (ENSRNOT00000018549, exon 1 of 4)	241	ENSRNOT00000018549	ENSRNOG00000013862	ENSRNOT00000018549			Dusp2			protein_coding
NA_peak_3527	8	12355929	12355929	+	1209524	NA	promoter-TSS (ENSRNOT00000009318)	protein_coding-promoter-TSS (ENSRNOT00000009318)	162	ENSRNOT00000068445	ENSRNOG00000024863	ENSRNOT00000068445			Fam76b			protein_coding
NA_peak_2175	20	22447907	22447907	+	1209524	NA	promoter-TSS (ENSRNOT00000000791)	pseudogene-promoter-TSS (ENSRNOT00000000791)	-87	ENSRNOT00000000791	ENSRNOG00000000639	ENSRNOT00000000791			Ado			pseudogene
NA_peak_1250	15	2982097	2982097	+	1209524	NA	Intergenic	Intergenic	-15521	ENSRNOT00000017383	ENSRNOG00000012850	ENSRNOT00000070893			Kat6b			protein_coding
NA_peak_3265	7	11245828	11245828	+	1209524	NA	promoter-TSS (ENSRNOT00000027951)	protein_coding-promoter-TSS (ENSRNOT00000027951)	-47	ENSRNOT00000027951	ENSRNOG00000020593	ENSRNOT00000027951			Gipc3			protein_coding
NA_peak_2424	3	128601052	128601052	+	1209524	NA	Intergenic	Intergenic	-155747	ENSRNOT00000042853	ENSRNOG00000033119	ENSRNOT00000042853			Plcb4			protein_coding
NA_peak_527	10	47282315	47282315	+	1209524	NA	exon (ENSRNOT00000057953, exon 1 of 2)	protein_coding-exon (ENSRNOT00000057953, exon 1 of 2)	107	ENSRNOT00000057953	ENSRNOG00000002303	ENSRNOT00000057953			Kcnj12			protein_coding
NA_peak_3464	7	129724108	129724108	+	1209524	NA	intron (ENSRNOT00000006034, intron 1 of 12)	protein_coding-intron (ENSRNOT00000006034, intron 1 of 12)	195	ENSRNOT00000006034	ENSRNOG00000004538	ENSRNOT00000006034			Brd1			protein_coding
NA_peak_1484	17	1797647	1797647	+	1209524	NA	promoter-TSS (ENSRNOT00000033017)	protein_coding-promoter-TSS (ENSRNOT00000033017)	85	ENSRNOT00000033017	ENSRNOG00000018999	ENSRNOT00000033017			Cdc14b			protein_coding
NA_peak_1421	16	26739427	26739427	+	1209524	NA	promoter-TSS (ENSRNOT00000047223)	protein_coding-promoter-TSS (ENSRNOT00000047223)	38	ENSRNOT00000047223	ENSRNOG00000029441	ENSRNOT00000047223			Klhl2			protein_coding
NA_peak_3689	8	115620354	115620354	+	1209524	NA	exon (ENSRNOT00000018995, exon 2 of 2)	protein_coding-exon (ENSRNOT00000018995, exon 2 of 2)	1040	ENSRNOT00000018995	ENSRNOG00000014161	ENSRNOT00000018995			Rbm15b			protein_coding
NA_peak_3661	8	93395793	93395793	+	1209524	NA	Intergenic	Intergenic	-5488	ENSRNOT00000056930	ENSRNOG00000027728	ENSRNOT00000056930			Ibtk			protein_coding
NA_peak_88	1	80515512	80515512	+	1209524	NA	promoter-TSS (ENSRNOT00000081565)	protein_coding-promoter-TSS (ENSRNOT00000081565)	182	ENSRNOT00000075144	ENSRNOG00000046000	ENSRNOT00000081565			Clasrp			protein_coding
NA_peak_567	10	62623563	62623563	+	1209524	NA	intron (ENSRNOT00000021368, intron 22 of 23)	protein_coding-intron (ENSRNOT00000021368, intron 22 of 23)	25281	ENSRNOT00000034282	ENSRNOG00000015002	ENSRNOT00000034282			Abhd15			protein_coding
NA_peak_3588	8	59278783	59278783	+	1203011	NA	exon (ENSRNOT00000017053, exon 1 of 8)	protein_coding-exon (ENSRNOT00000017053, exon 1 of 8)	521	ENSRNOT00000017053	ENSRNOG00000012106	ENSRNOT00000017053			Dnaja4			protein_coding
NA_peak_1003	13	51973085	51973085	+	1203011	NA	TTS (ENSRNOT00000007833)	protein_coding-TTS (ENSRNOT00000007833)	111	ENSRNOT00000008164	ENSRNOG00000005988	ENSRNOT00000008164			Arl8a			protein_coding
NA_peak_2647	4	99398819	99398819	+	1196653	NA	promoter-TSS (ENSRNOT00000088018)	protein_coding-promoter-TSS (ENSRNOT00000088018)	325	ENSRNOT00000064374	ENSRNOG00000007272	ENSRNOT00000064374			Rnf103			protein_coding
NA_peak_2294	3	22811941	22811941	+	1196653	NA	promoter-TSS (ENSRNOT00000086147)	protein_coding-promoter-TSS (ENSRNOT00000086147)	14	ENSRNOT00000086147	ENSRNOG00000010897	ENSRNOT00000086147			Nek6			protein_coding
NA_peak_2002	2	165739666	165739666	+	1196653	NA	intron (ENSRNOT00000014384, intron 1 of 16)	protein_coding-intron (ENSRNOT00000014384, intron 1 of 16)	208	ENSRNOT00000014384	ENSRNOG00000010768	ENSRNOT00000014384			Kpna4			protein_coding
NA_peak_2850	5	101588526	101588526	+	1196653	NA	promoter-TSS (ENSRNOT00000016130)	protein_coding-promoter-TSS (ENSRNOT00000016130)	72	ENSRNOT00000082239	ENSRNOG00000011498	ENSRNOT00000016130			Psip1			protein_coding
NA_peak_3058	6	2729504	2729504	+	1196653	NA	promoter-TSS (ENSRNOT00000009175)	protein_coding-promoter-TSS (ENSRNOT00000009175)	-110	ENSRNOT00000009175	ENSRNOG00000006929	ENSRNOT00000009175			Hnrnpll			protein_coding
NA_peak_2160	20	11972511	11972511	+	1196653	NA	exon (ENSRNOT00000001642, exon 1 of 11)	protein_coding-exon (ENSRNOT00000001642, exon 1 of 11)	130	ENSRNOT00000001642	ENSRNOG00000001227	ENSRNOT00000083851			Adarb1			protein_coding
NA_peak_1608	17	89952057	89952057	+	1196653	NA	intron (ENSRNOT00000091023, intron 1 of 9)	protein_coding-intron (ENSRNOT00000057572, intron 1 of 10)	242	ENSRNOT00000091023	ENSRNOG00000031325	ENSRNOT00000057572			Abi1			protein_coding
NA_peak_2437	3	147772277	147772277	+	1196653	NA	exon (ENSRNOT00000008713, exon 1 of 8)	protein_coding-exon (ENSRNOT00000008713, exon 1 of 8)	112	ENSRNOT00000008713	ENSRNOG00000005766	ENSRNOT00000008713			Tbc1d20			protein_coding
NA_peak_611	10	76543080	76543080	+	1196653	NA	Intergenic	Intergenic	37379	ENSRNOT00000080054	ENSRNOG00000056866	ENSRNOT00000080054			AABR07030218.1			snRNA
NA_peak_289	1	219078046	219078046	+	1196653	NA	promoter-TSS (ENSRNOT00000023020)	protein_coding-promoter-TSS (ENSRNOT00000023020)	17	ENSRNOT00000023020	ENSRNOG00000016791	ENSRNOT00000023020			Chka			protein_coding
NA_peak_2734	4	168323650	168323650	+	1196653	NA	intron (ENSRNOT00000082102, intron 1 of 22)	protein_coding-intron (ENSRNOT00000082102, intron 1 of 22)	101	ENSRNOT00000082102	ENSRNOG00000006338	ENSRNOT00000066575			Lrp6			protein_coding
NA_peak_3070	6	10674641	10674641	+	1196653	NA	exon (ENSRNOT00000020337, exon 1 of 2)	protein_coding-exon (ENSRNOT00000020337, exon 1 of 2)	270	ENSRNOT00000020337	ENSRNOG00000028504	ENSRNOT00000020337			Socs5			protein_coding
NA_peak_2438	3	147865365	147865365	+	1196653	NA	promoter-TSS (ENSRNOT00000009852)	protein_coding-promoter-TSS (ENSRNOT00000009852)	28	ENSRNOT00000009852	ENSRNOG00000007514	ENSRNOT00000009852			Sox12			protein_coding
NA_peak_3189	6	109466032	109466032	+	1196653	NA	promoter-TSS (ENSRNOT00000011339)	protein_coding-promoter-TSS (ENSRNOT00000011339)	-28	ENSRNOT00000011339	ENSRNOG00000008224	ENSRNOT00000011339			Jdp2			protein_coding
NA_peak_459	10	13915168	13915168	+	1196653	NA	promoter-TSS (ENSRNOT00000015092)	protein_coding-promoter-TSS (ENSRNOT00000015092)	-46	ENSRNOT00000015092	ENSRNOG00000010771	ENSRNOT00000015092			Pkd1			protein_coding
NA_peak_2034	2	197786307	197786307	+	1196653	NA	Intergenic	Intergenic	2026	ENSRNOT00000073822	ENSRNOG00000049706	ENSRNOT00000073822			AABR07012575.1			miRNA
NA_peak_114	1	90175769	90175769	+	1196653	NA	intron (ENSRNOT00000076419, intron 1 of 1)	protein_coding-intron (ENSRNOT00000076419, intron 1 of 1)	336	ENSRNOT00000076419	ENSRNOG00000021129	ENSRNOT00000076419			RGD1308428			protein_coding
NA_peak_3566	8	48651678	48651678	+	1196653	NA	exon (ENSRNOT00000030745, exon 1 of 14)	protein_coding-exon (ENSRNOT00000030745, exon 1 of 14)	386	ENSRNOT00000030745	ENSRNOG00000009719	ENSRNOT00000030745			C2cd2l			protein_coding
NA_peak_259	1	200162961	200162961	+	1196653	NA	exon (ENSRNOT00000027644, exon 1 of 16)	protein_coding-exon (ENSRNOT00000027644, exon 1 of 16)	145	ENSRNOT00000027644	ENSRNOG00000020394	ENSRNOT00000027644			Mcmbp			protein_coding
NA_peak_1129	14	23002023	23002023	+	1196653	NA	promoter-TSS (ENSRNOT00000002736)	protein_coding-promoter-TSS (ENSRNOT00000002736)	-12	ENSRNOT00000002736	ENSRNOG00000001996	ENSRNOT00000002736			Ythdc1			protein_coding
NA_peak_2116	20	2501365	2501365	+	1196653	NA	promoter-TSS (ENSRNOT00000084559)	protein_coding-promoter-TSS (ENSRNOT00000084559)	73	ENSRNOT00000084559	ENSRNOG00000000785	ENSRNOT00000086884			Trim39			protein_coding
NA_peak_1307	15	41769983	41769983	+	1196653	NA	intron (ENSRNOT00000034400, intron 1 of 16)	protein_coding-intron (ENSRNOT00000034400, intron 1 of 16)	129	ENSRNOT00000034400	ENSRNOG00000014945	ENSRNOT00000034400			Kpna3			protein_coding
NA_peak_511	10	43224021	43224021	+	1196653	NA	promoter-TSS (ENSRNOT00000003473)	protein_coding-promoter-TSS (ENSRNOT00000003473)	-248	ENSRNOT00000003473	ENSRNOG00000002575	ENSRNOT00000003473			Sap30l			protein_coding
NA_peak_67	1	65538144	65538144	+	1196653	NA	exon (ENSRNOT00000031007, exon 1 of 6)	protein_coding-exon (ENSRNOT00000031007, exon 1 of 6)	504	ENSRNOT00000031007	ENSRNOG00000027514	ENSRNOT00000031007			Ube2m			protein_coding
NA_peak_1482	17	1086029	1086029	+	1196653	NA	promoter-TSS (ENSRNOT00000026287)	protein_coding-promoter-TSS (ENSRNOT00000026287)	-144	ENSRNOT00000026287	ENSRNOG00000019354	ENSRNOT00000026287			Ptch1			protein_coding
NA_peak_1636	18	24693251	24693251	+	1196653	NA	exon (ENSRNOT00000021708, exon 1 of 1)	protein_coding-exon (ENSRNOT00000021708, exon 1 of 1)	230	ENSRNOT00000021708	ENSRNOG00000016216	ENSRNOT00000021708			Sft2d3			protein_coding
NA_peak_2400	3	114827993	114827993	+	1196653	NA	exon (ENSRNOT00000000184, exon 1 of 7)	protein_coding-exon (ENSRNOT00000000184, exon 1 of 7)	161	ENSRNOT00000000184	ENSRNOG00000000170	ENSRNOT00000000184			Slc30a4			protein_coding
NA_peak_2966	5	152122517	152122517	+	1196653	NA	promoter-TSS (ENSRNOT00000068634)	protein_coding-promoter-TSS (ENSRNOT00000068634)	25	ENSRNOT00000068634	ENSRNOG00000042411	ENSRNOT00000077248			Rps6ka1			protein_coding
NA_peak_785	11	65209528	65209528	+	1196653	NA	promoter-TSS (ENSRNOT00000003867)	protein_coding-promoter-TSS (ENSRNOT00000003867)	-260	ENSRNOT00000077612	ENSRNOG00000002833	ENSRNOT00000003867			Gsk3b			protein_coding
NA_peak_1833	19	55300099	55300099	+	1193346	NA	promoter-TSS (ENSRNOT00000092169)	protein_coding-promoter-TSS (ENSRNOT00000092169)	-296	ENSRNOT00000092169	ENSRNOG00000051531	ENSRNOT00000092169			Ctu2			protein_coding
NA_peak_1053	13	96237771	96237771	+	1191837	NA	exon (ENSRNOT00000044477, exon 1 of 14)	protein_coding-exon (ENSRNOT00000044477, exon 1 of 14)	703	ENSRNOT00000044477	ENSRNOG00000033790	ENSRNOT00000078061			Hnrnpu			protein_coding
NA_peak_2493	3	163814815	163814815	+	1188621	NA	promoter-TSS (ENSRNOT00000055127)	protein_coding-promoter-TSS (ENSRNOT00000055127)	-16	ENSRNOT00000055127	ENSRNOG00000008194	ENSRNOT00000076833			Znfx1			protein_coding
NA_peak_1784	19	37873640	37873640	+	1188621	NA	intron (ENSRNOT00000089921, intron 1 of 2)	protein_coding-intron (ENSRNOT00000026163, intron 1 of 2)	101	ENSRNOT00000089921	ENSRNOG00000019290	ENSRNOT00000026163			Pskh1			protein_coding
NA_peak_887	12	17416525	17416525	+	1188621	NA	intron (ENSRNOT00000092186, intron 1 of 13)	protein_coding-intron (ENSRNOT00000089590, intron 1 of 10)	114	ENSRNOT00000092186	ENSRNOG00000054033	ENSRNOT00000089590			Adap1			protein_coding
NA_peak_1660	18	31071377	31071377	+	1188621	NA	promoter-TSS (ENSRNOT00000060432)	protein_coding-promoter-TSS (ENSRNOT00000060432)	-6	ENSRNOT00000060432	ENSRNOG00000019688	ENSRNOT00000060432			Diaph1			protein_coding
NA_peak_3314	7	30408756	30408756	+	1188621	NA	exon (ENSRNOT00000072733, exon 1 of 22)	protein_coding-exon (ENSRNOT00000072733, exon 1 of 22)	237	ENSRNOT00000072733	ENSRNOG00000050317	ENSRNOT00000072733			Uhrf1bp1l			protein_coding
NA_peak_421	1	277826945	277826945	+	1188621	NA	exon (ENSRNOT00000073346, exon 1 of 19)	protein_coding-exon (ENSRNOT00000073346, exon 1 of 19)	233	ENSRNOT00000084915	ENSRNOG00000017164	ENSRNOT00000073346			Afap1l2			protein_coding
NA_peak_2571	4	27331583	27331583	+	1188621	NA	promoter-TSS (ENSRNOT00000010118)	protein_coding-promoter-TSS (ENSRNOT00000010118)	-1	ENSRNOT00000010118	ENSRNOG00000026319	ENSRNOT00000010118			Akap9			protein_coding
NA_peak_2355	3	72118400	72118400	+	1188621	NA	Intergenic	Intergenic	-4720	ENSRNOT00000009708	ENSRNOG00000006832	ENSRNOT00000009708			Zdhhc5			protein_coding
NA_peak_3862	9	96722026	96722026	+	1188621	NA	intron (ENSRNOT00000088192, intron 1 of 19)	protein_coding-intron (ENSRNOT00000088192, intron 1 of 19)	16949	ENSRNOT00000069597	ENSRNOG00000044330	ENSRNOT00000069597			5S_rRNA			rRNA
NA_peak_2929	5	144996160	144996160	+	1188621	NA	exon (ENSRNOT00000016992, exon 1 of 30)	protein_coding-exon (ENSRNOT00000016992, exon 1 of 30)	271	ENSRNOT00000016992	ENSRNOG00000012397	ENSRNOT00000016992			Zmym4			protein_coding
NA_peak_2723	4	157612789	157612789	+	1188621	NA	promoter-TSS (ENSRNOT00000086597)	miRNA-promoter-TSS (ENSRNOT00000086597)	253	ENSRNOT00000055970	ENSRNOG00000018309	ENSRNOT00000055970			Chd4			protein_coding
NA_peak_2096	2	247988144	247988144	+	1188621	NA	intron (ENSRNOT00000022387, intron 1 of 12)	protein_coding-intron (ENSRNOT00000022387, intron 1 of 12)	318	ENSRNOT00000022387	ENSRNOG00000016419	ENSRNOT00000022387			Pdlim5			protein_coding
NA_peak_1056	13	98231111	98231111	+	1188621	NA	promoter-TSS (ENSRNOT00000003837)	protein_coding-promoter-TSS (ENSRNOT00000003837)	-215	ENSRNOT00000003837	ENSRNOG00000002841	ENSRNOT00000082844			Cdc42bpa			protein_coding
NA_peak_3022	5	167331326	167331326	+	1188621	NA	exon (ENSRNOT00000024443, exon 1 of 23)	protein_coding-exon (ENSRNOT00000024443, exon 1 of 23)	291	ENSRNOT00000024443	ENSRNOG00000017940	ENSRNOT00000024443			Rere			protein_coding
NA_peak_181	1	146556587	146556587	+	1188621	NA	promoter-TSS (ENSRNOT00000017636)	protein_coding-promoter-TSS (ENSRNOT00000017636)	-416	ENSRNOT00000017636	ENSRNOG00000013017	ENSRNOT00000017636			Arnt2			protein_coding
NA_peak_2631	4	81244860	81244860	+	1188621	NA	intron (ENSRNOT00000044407, intron 1 of 4)	protein_coding-intron (ENSRNOT00000015828, intron 1 of 5)	362	ENSRNOT00000015828	ENSRNOG00000011814	ENSRNOT00000015828			Cbx3			protein_coding
NA_peak_2689	4	133285965	133285965	+	1188621	NA	promoter-TSS (ENSRNOT00000084158)	protein_coding-promoter-TSS (ENSRNOT00000084158)	-149	ENSRNOT00000084158	ENSRNOG00000024647	ENSRNOT00000029115			Ppp4r2			protein_coding
NA_peak_624	10	85381175	85381175	+	1188621	NA	Intergenic	Intergenic	-3706	ENSRNOT00000034305	ENSRNOG00000022771	ENSRNOT00000034305			Arhgap23			protein_coding
NA_peak_1937	2	94377799	94377799	+	1188621	NA	exon (ENSRNOT00000080313, exon 4 of 12)	protein_coding-exon (ENSRNOT00000080313, exon 4 of 12)	727	ENSRNOT00000080313	ENSRNOG00000054426	ENSRNOT00000080313			Zfp704			protein_coding
NA_peak_917	12	32754096	32754096	+	1188621	NA	exon (ENSRNOT00000001277, exon 1 of 8)	protein_coding-exon (ENSRNOT00000001277, exon 1 of 8)	272	ENSRNOT00000001277	ENSRNOG00000000962	ENSRNOT00000001277			Slc15a4			protein_coding
NA_peak_2715	4	153661748	153661748	+	1188621	NA	Intergenic	Intergenic	-67975	ENSRNOT00000082982	ENSRNOG00000053203	ENSRNOT00000082982			Mical3			protein_coding
NA_peak_1710	18	71396017	71396017	+	1174454	NA	exon (ENSRNOT00000024831, exon 1 of 4)	protein_coding-exon (ENSRNOT00000024831, exon 1 of 4)	187	ENSRNOT00000024831	ENSRNOG00000018359	ENSRNOT00000024831			Smad7			protein_coding
NA_peak_2179	20	26853241	26853241	+	1174454	NA	Intergenic	Intergenic	-1042	ENSRNOT00000078739	ENSRNOG00000051592	ENSRNOT00000078739			AABR07044925.1			protein_coding
NA_peak_2195	20	33772775	33772775	+	1174454	NA	TTS (ENSRNOT00000078257)	lincRNA-TTS (ENSRNOT00000078257)	28085	ENSRNOT00000078257	ENSRNOG00000057977	ENSRNOT00000078257			AABR07045086.1			lincRNA
NA_peak_2144	20	7484843	7484843	+	1174074	NA	promoter-TSS (ENSRNOT00000081604)	protein_coding-promoter-TSS (ENSRNOT00000081604)	43	ENSRNOT00000081604	ENSRNOG00000000498	ENSRNOT00000081604			Anks1a			protein_coding
NA_peak_2856	5	117038708	117038708	+	1169054	NA	exon (ENSRNOT00000009897, exon 1 of 8)	protein_coding-exon (ENSRNOT00000009897, exon 1 of 8)	174	ENSRNOT00000009897	ENSRNOG00000007527	ENSRNOT00000009897			Tm2d1			protein_coding
NA_peak_1002	13	51784443	51784443	+	1164970	NA	exon (ENSRNOT00000089068, exon 1 of 26)	protein_coding-exon (ENSRNOT00000089068, exon 1 of 26)	196	ENSRNOT00000089068	ENSRNOG00000051440	ENSRNOT00000089068			Ppp1r12b			protein_coding
NA_peak_234	1	190914682	190914682	+	1164970	NA	promoter-TSS (ENSRNOT00000023189)	protein_coding-promoter-TSS (ENSRNOT00000023189)	-72	ENSRNOT00000023189	ENSRNOG00000017260	ENSRNOT00000023189			Cdr2			protein_coding
NA_peak_3626	8	70630774	70630774	+	1164970	NA	promoter-TSS (ENSRNOT00000051353)	protein_coding-promoter-TSS (ENSRNOT00000051353)	7	ENSRNOT00000051353	ENSRNOG00000030800	ENSRNOT00000051353			Igdcc3			protein_coding
NA_peak_474	10	17074968	17074968	+	1164970	NA	intron (ENSRNOT00000039398, intron 1 of 4)	protein_coding-intron (ENSRNOT00000039398, intron 1 of 4)	171	ENSRNOT00000039398	ENSRNOG00000027606	ENSRNOT00000039398			Neurl1b			protein_coding
NA_peak_3040	5	171439154	171439154	+	1164970	NA	Intergenic	Intergenic	-2406	ENSRNOT00000019873	ENSRNOG00000014805	ENSRNOT00000019873			Wrap73			protein_coding
NA_peak_1706	18	70970049	70970049	+	1155587	NA	promoter-TSS (ENSRNOT00000025217)	protein_coding-promoter-TSS (ENSRNOT00000025217)	-401	ENSRNOT00000083320	ENSRNOG00000058148	ENSRNOT00000083320			SNORD58			snoRNA
NA_peak_3276	7	12144361	12144361	+	1148712	NA	exon (ENSRNOT00000077122, exon 1 of 19)	protein_coding-exon (ENSRNOT00000077122, exon 1 of 19)	199	ENSRNOT00000077122	ENSRNOG00000051499	ENSRNOT00000085899			Tcf3			protein_coding
NA_peak_1622	18	6083017	6083017	+	1148712	NA	promoter-TSS (ENSRNOT00000032454)	protein_coding-promoter-TSS (ENSRNOT00000032454)	16	ENSRNOT00000032454	ENSRNOG00000016800	ENSRNOT00000086335			Ss18			protein_coding
NA_peak_1202	14	84820282	84820282	+	1148712	NA	exon (ENSRNOT00000057501, exon 1 of 19)	protein_coding-exon (ENSRNOT00000057501, exon 1 of 19)	133	ENSRNOT00000057501	ENSRNOG00000007120	ENSRNOT00000057501			Mtmr3			protein_coding
NA_peak_1509	17	9952969	9952969	+	1148712	NA	promoter-TSS (ENSRNOT00000060928)	protein_coding-promoter-TSS (ENSRNOT00000060928)	-71	ENSRNOT00000060928	ENSRNOG00000016680	ENSRNOT00000060928			Nsd1			protein_coding
NA_peak_3011	5	164898211	164898211	+	1148712	NA	intron (ENSRNOT00000011747, intron 1 of 4)	protein_coding-intron (ENSRNOT00000011747, intron 1 of 4)	209	ENSRNOT00000011747	ENSRNOG00000008619	ENSRNOT00000011747			Agtrap			protein_coding
NA_peak_1198	14	84231596	84231596	+	1148712	NA	promoter-TSS (ENSRNOT00000066362)	protein_coding-promoter-TSS (ENSRNOT00000066362)	-43	ENSRNOT00000066362	ENSRNOG00000042041	ENSRNOT00000066362			Gal3st1			protein_coding
NA_peak_1501	17	9441417	9441417	+	1148712	NA	exon (ENSRNOT00000000146, exon 1 of 5)	protein_coding-exon (ENSRNOT00000000146, exon 1 of 5)	109	ENSRNOT00000000146	ENSRNOG00000000133	ENSRNOT00000000146			Txndc15			protein_coding
NA_peak_3467	7	130071471	130071471	+	1148712	NA	exon (ENSRNOT00000078620, exon 1 of 10)	protein_coding-exon (ENSRNOT00000078620, exon 1 of 10)	349	ENSRNOT00000078620	ENSRNOG00000060120	ENSRNOT00000078620			Selenoo			protein_coding
NA_peak_2170	20	19825222	19825222	+	1148712	NA	promoter-TSS (ENSRNOT00000032159)	protein_coding-promoter-TSS (ENSRNOT00000032159)	-72	ENSRNOT00000032159	ENSRNOG00000024019	ENSRNOT00000032159			Ccdc6			protein_coding
NA_peak_34	1	30857182	30857182	+	1148712	NA	Intergenic	Intergenic	-6035	ENSRNOT00000015421	ENSRNOG00000011588	ENSRNOT00000015421			Rnf146			protein_coding
NA_peak_885	12	16813844	16813844	+	1148712	NA	promoter-TSS (ENSRNOT00000033551)	protein_coding-promoter-TSS (ENSRNOT00000033551)	-6	ENSRNOT00000033551	ENSRNOG00000022767	ENSRNOT00000033551			Elfn1			protein_coding
NA_peak_3261	7	11033442	11033442	+	1148712	NA	exon (ENSRNOT00000007498, exon 1 of 7)	protein_coding-exon (ENSRNOT00000007498, exon 1 of 7)	125	ENSRNOT00000007498	ENSRNOG00000005446	ENSRNOT00000007498			Gna11			protein_coding
NA_peak_672	10	95768985	95768985	+	1141982	NA	Intergenic	Intergenic	-1169	ENSRNOT00000030300	ENSRNOG00000003213	ENSRNOT00000030300			Helz			protein_coding
NA_peak_3651	8	82350716	82350716	+	1137607	NA	intron (ENSRNOT00000013053, intron 1 of 5)	protein_coding-intron (ENSRNOT00000013053, intron 1 of 5)	392	ENSRNOT00000013053	ENSRNOG00000009381	ENSRNOT00000080797			Mapk6			protein_coding
NA_peak_2006	2	178334797	178334797	+	1137607	NA	exon (ENSRNOT00000090152, exon 1 of 17)	protein_coding-exon (ENSRNOT00000090152, exon 1 of 17)	103	ENSRNOT00000090152	ENSRNOG00000027833	ENSRNOT00000038543			Fnip2			protein_coding
NA_peak_2685	4	131464536	131464536	+	1137607	NA	intron (ENSRNOT00000013271, intron 3 of 16)	protein_coding-intron (ENSRNOT00000013271, intron 3 of 16)	230219	ENSRNOT00000013271	ENSRNOG00000009184	ENSRNOT00000013271			Foxp1			protein_coding
NA_peak_3470	7	130176552	130176552	+	1137607	NA	exon (ENSRNOT00000051347, exon 1 of 20)	protein_coding-exon (ENSRNOT00000051347, exon 1 of 20)	144	ENSRNOT00000051347	ENSRNOG00000029866	ENSRNOT00000051347			Dennd6b			protein_coding
NA_peak_2720	4	157452843	157452843	+	1137607	NA	promoter-TSS (ENSRNOT00000088622)	protein_coding-promoter-TSS (ENSRNOT00000088622)	-226	ENSRNOT00000088622	ENSRNOG00000016589	ENSRNOT00000022467			Mlf2			protein_coding
NA_peak_2987	5	156581940	156581940	+	1137607	NA	intron (ENSRNOT00000076772, intron 1 of 7)	protein_coding-intron (ENSRNOT00000076772, intron 1 of 7)	208	ENSRNOT00000076772	ENSRNOG00000014445	ENSRNOT00000076772			Hp1bp3			protein_coding
NA_peak_1310	15	42019301	42019301	+	1137607	NA	Intergenic	Intergenic	-58038	ENSRNOT00000084318	ENSRNOG00000051849	ENSRNOT00000084318						miRNA
NA_peak_2273	3	11277589	11277589	+	1137607	NA	promoter-TSS (ENSRNOT00000082735)	lincRNA-promoter-TSS (ENSRNOT00000082735)	168	ENSRNOT00000015792	ENSRNOG00000011467	ENSRNOT00000015792			Uck1			protein_coding
NA_peak_517	10	45322587	45322587	+	1137607	NA	exon (ENSRNOT00000047268, exon 1 of 6)	protein_coding-exon (ENSRNOT00000047268, exon 1 of 6)	339	ENSRNOT00000047268	ENSRNOG00000002915	ENSRNOT00000047268			Trim11			protein_coding
NA_peak_3452	7	125588729	125588729	+	1137607	NA	intron (ENSRNOT00000016679, intron 2 of 8)	protein_coding-intron (ENSRNOT00000016679, intron 2 of 8)	12402	ENSRNOT00000016679	ENSRNOG00000012475	ENSRNOT00000016679			Prr5			protein_coding
NA_peak_2892	5	136349505	136349505	+	1137607	NA	Intergenic	Intergenic	-56625	ENSRNOT00000093099	ENSRNOG00000019381	ENSRNOT00000093099			Eri3			protein_coding
NA_peak_3201	6	123577653	123577653	+	1137607	NA	promoter-TSS (ENSRNOT00000006604)	protein_coding-promoter-TSS (ENSRNOT00000006604)	42	ENSRNOT00000006604	ENSRNOG00000004709	ENSRNOT00000006604			Foxn3			protein_coding
NA_peak_393	1	263718514	263718514	+	1137607	NA	intron (ENSRNOT00000074810, intron 1 of 16)	protein_coding-intron (ENSRNOT00000074810, intron 1 of 16)	231	ENSRNOT00000074810	ENSRNOG00000050742	ENSRNOT00000074810			Dnmbp			protein_coding
NA_peak_1929	2	80767464	80767464	+	1137607	NA	Intergenic	Intergenic	93906	ENSRNOT00000085119	ENSRNOG00000055866	ENSRNOT00000085119			AABR07008948.1			lincRNA
NA_peak_92	1	82120341	82120341	+	1137607	NA	intron (ENSRNOT00000027684, intron 1 of 3)	protein_coding-intron (ENSRNOT00000027684, intron 1 of 3)	561	ENSRNOT00000027684	ENSRNOG00000020426	ENSRNOT00000027684			Erf			protein_coding
NA_peak_1606	17	85748928	85748928	+	1131398	NA	promoter-TSS (ENSRNOT00000085236)	pseudogene-promoter-TSS (ENSRNOT00000085236)	-349	ENSRNOT00000085236	ENSRNOG00000056540	ENSRNOT00000085236			AABR07028776.1			pseudogene
NA_peak_2458	3	152810465	152810465	+	1131398	NA	intron (ENSRNOT00000037177, intron 6 of 11)	protein_coding-intron (ENSRNOT00000037177, intron 6 of 11)	-47127	ENSRNOT00000027445	ENSRNOG00000020246	ENSRNOT00000027445			Myl9			protein_coding
NA_peak_2804	5	61565137	61565137	+	1131398	NA	promoter-TSS (ENSRNOT00000089938)	protein_coding-promoter-TSS (ENSRNOT00000089938)	73	ENSRNOT00000090186	ENSRNOG00000055779	ENSRNOT00000090186			Tdrd7			protein_coding
NA_peak_2757	5	13097147	13097147	+	1131398	NA	exon (ENSRNOT00000061884, exon 1 of 24)	protein_coding-exon (ENSRNOT00000061884, exon 1 of 24)	194	ENSRNOT00000061884	ENSRNOG00000006833	ENSRNOT00000061884			Rb1cc1			protein_coding
NA_peak_1747	19	19672872	19672872	+	1131398	NA	promoter-TSS (ENSRNOT00000064275)	protein_coding-promoter-TSS (ENSRNOT00000064275)	16	ENSRNOT00000064275	ENSRNOG00000014419	ENSRNOT00000064275			Brd7			protein_coding
NA_peak_632	10	86367689	86367689	+	1125187	NA	promoter-TSS (ENSRNOT00000009114)	protein_coding-promoter-TSS (ENSRNOT00000009114)	2	ENSRNOT00000009114	ENSRNOG00000006450	ENSRNOT00000009114			Erbb2			protein_coding
NA_peak_1393	16	14210239	14210239	+	1125187	NA	intron (ENSRNOT00000016494, intron 1 of 11)	protein_coding-intron (ENSRNOT00000016494, intron 1 of 11)	210	ENSRNOT00000016494	ENSRNOG00000022781	ENSRNOT00000016494			Ccser2			protein_coding
NA_peak_626	10	85603432	85603432	+	1125187	NA	promoter-TSS (ENSRNOT00000075495)	miRNA-promoter-TSS (ENSRNOT00000075495)	85	ENSRNOT00000075495	ENSRNOG00000050635	ENSRNOT00000075495			AC134024.1			miRNA
NA_peak_2414	3	123376240	123376240	+	1125187	NA	intron (ENSRNOT00000028842, intron 1 of 36)	protein_coding-intron (ENSRNOT00000028842, intron 1 of 36)	215	ENSRNOT00000028842	ENSRNOG00000021237	ENSRNOT00000028842			RGD1565616			protein_coding
NA_peak_2697	4	145653611	145653611	+	1125187	NA	promoter-TSS (ENSRNOT00000038964)	protein_coding-promoter-TSS (ENSRNOT00000038964)	9	ENSRNOT00000038964	ENSRNOG00000042482	ENSRNOT00000038964			Tatdn2			protein_coding
NA_peak_3026	5	169110181	169110181	+	1125187	NA	intron (ENSRNOT00000011960, intron 1 of 15)	protein_coding-intron (ENSRNOT00000011960, intron 1 of 15)	274	ENSRNOT00000011960	ENSRNOG00000008802	ENSRNOT00000093119			Dnajc11			protein_coding
NA_peak_3141	6	91489843	91489843	+	1125187	NA	exon (ENSRNOT00000059187, exon 1 of 3)	protein_coding-exon (ENSRNOT00000059187, exon 1 of 3)	523	ENSRNOT00000059187	ENSRNOG00000028155	ENSRNOT00000059187			Dnaaf2			protein_coding
NA_peak_2807	5	61792729	61792729	+	1125187	NA	exon (ENSRNOT00000064685, exon 1 of 6)	protein_coding-exon (ENSRNOT00000064685, exon 1 of 6)	199	ENSRNOT00000064685	ENSRNOG00000009576	ENSRNOT00000064685			Xpa			protein_coding
NA_peak_900	12	24474145	24474145	+	1125187	NA	exon (ENSRNOT00000001973, exon 1 of 1)	protein_coding-exon (ENSRNOT00000001973, exon 1 of 1)	164	ENSRNOT00000001973	ENSRNOG00000001452	ENSRNOT00000001973			Fzd9			protein_coding
NA_peak_2070	2	223322281	223322281	+	1125187	NA	intron (ENSRNOT00000015036, intron 1 of 13)	protein_coding-intron (ENSRNOT00000015036, intron 1 of 13)	304	ENSRNOT00000015036	ENSRNOG00000010827	ENSRNOT00000015036			Ptbp2			protein_coding
NA_peak_1360	15	103927416	103927416	+	1125187	NA	intron (ENSRNOT00000031036, intron 1 of 34)	protein_coding-intron (ENSRNOT00000013366, intron 1 of 33)	176	ENSRNOT00000031036	ENSRNOG00000010064	ENSRNOT00000013366			Abcc4			protein_coding
NA_peak_3931	X	64097387	64097387	+	1125187	NA	promoter-TSS (ENSRNOT00000039583)	unprocessed_pseudogene-promoter-TSS (ENSRNOT00000039583)	-547	ENSRNOT00000039583	ENSRNOG00000022607	ENSRNOT00000039583			AABR07038926.1			unprocessed_pseudogene
NA_peak_3900	9	119818689	119818689	+	1125187	NA	promoter-TSS (ENSRNOT00000019359)	protein_coding-promoter-TSS (ENSRNOT00000019359)	-379	ENSRNOT00000019359	ENSRNOG00000014319	ENSRNOT00000019359			Smchd1			protein_coding
NA_peak_2076	2	226779011	226779011	+	1125187	NA	intron (ENSRNOT00000055669, intron 1 of 16)	protein_coding-intron (ENSRNOT00000019244, intron 1 of 13)	255	ENSRNOT00000019244	ENSRNOG00000013798	ENSRNOT00000019244			Fnbp1l			protein_coding
NA_peak_794	11	70833707	70833707	+	1121477	NA	promoter-TSS (ENSRNOT00000002428)	protein_coding-promoter-TSS (ENSRNOT00000002428)	-130	ENSRNOT00000002428	ENSRNOG00000001782	ENSRNOT00000002428			Osbpl11			protein_coding
NA_peak_3600	8	62298584	62298584	+	1121358	NA	intron (ENSRNOT00000025525, intron 1 of 4)	protein_coding-intron (ENSRNOT00000025525, intron 1 of 4)	226	ENSRNOT00000025525	ENSRNOG00000018816	ENSRNOT00000025525			Cox5a			protein_coding
NA_peak_2706	4	150064320	150064320	+	1121358	NA	Intergenic	Intergenic	-33786	ENSRNOT00000056335	ENSRNOG00000037266	ENSRNOT00000056335			AABR07061868.1			processed_pseudogene
NA_peak_694	10	105600728	105600728	+	1121358	NA	intron (ENSRNOT00000068026, intron 1 of 18)	protein_coding-intron (ENSRNOT00000068026, intron 1 of 18)	185	ENSRNOT00000068026	ENSRNOG00000011459	ENSRNOT00000068026			Rhbdf2			protein_coding
NA_peak_2336	3	60813680	60813680	+	1121358	NA	intron (ENSRNOT00000058234, intron 1 of 4)	protein_coding-intron (ENSRNOT00000058234, intron 1 of 4)	189	ENSRNOT00000058234	ENSRNOG00000001596	ENSRNOT00000058234			Atp5mc3			protein_coding
NA_peak_1623	18	6207141	6207141	+	1121358	NA	promoter-TSS (ENSRNOT00000037955)	protein_coding-promoter-TSS (ENSRNOT00000037955)	-139	ENSRNOT00000037955	ENSRNOG00000026023	ENSRNOT00000037955			Taf4b			protein_coding
NA_peak_784	11	64583753	64583753	+	1121358	NA	intron (ENSRNOT00000004289, intron 1 of 6)	protein_coding-intron (ENSRNOT00000004289, intron 1 of 6)	241	ENSRNOT00000004289	ENSRNOG00000003114	ENSRNOT00000004289			B4galt4			protein_coding
NA_peak_13	1	11906243	11906243	+	1119846	NA	TTS (ENSRNOT00000089050)	rRNA-TTS (ENSRNOT00000089050)	350	ENSRNOT00000089050	ENSRNOG00000051831	ENSRNOT00000089050			5_8S_rRNA			rRNA
NA_peak_1765	19	25366098	25366098	+	1104282	NA	exon (ENSRNOT00000003762, exon 1 of 5)	protein_coding-exon (ENSRNOT00000003762, exon 1 of 5)	708	ENSRNOT00000003762	ENSRNOG00000026211	ENSRNOT00000003762			Mri1			protein_coding
NA_peak_1321	15	51223093	51223093	+	1099917	NA	exon (ENSRNOT00000064428, exon 1 of 8)	protein_coding-exon (ENSRNOT00000064428, exon 1 of 8)	109	ENSRNOT00000088928	ENSRNOG00000016321	ENSRNOT00000088928			Entpd4			protein_coding
NA_peak_2944	5	148923154	148923154	+	1099917	NA	promoter-TSS (ENSRNOT00000048781)	protein_coding-promoter-TSS (ENSRNOT00000048781)	56	ENSRNOT00000048781	ENSRNOG00000011927	ENSRNOT00000048781			Sdc3			protein_coding
NA_peak_3413	7	117434730	117434730	+	1099917	NA	exon (ENSRNOT00000040981, exon 1 of 6)	protein_coding-exon (ENSRNOT00000040981, exon 1 of 6)	311	ENSRNOT00000040981	ENSRNOG00000029238	ENSRNOT00000040981			Hgh1			protein_coding
NA_peak_1694	18	63357137	63357137	+	1084044	NA	promoter-TSS (ENSRNOT00000089408)	protein_coding-promoter-TSS (ENSRNOT00000089408)	57	ENSRNOT00000089408	ENSRNOG00000025324	ENSRNOT00000089408			Spire1			protein_coding
NA_peak_810	11	75434089	75434089	+	1074905	NA	promoter-TSS (ENSRNOT00000032569)	protein_coding-promoter-TSS (ENSRNOT00000032569)	-108	ENSRNOT00000032569	ENSRNOG00000024040	ENSRNOT00000032569			Mb21d2			protein_coding
NA_peak_254	1	199159035	199159035	+	1074905	NA	promoter-TSS (ENSRNOT00000025618)	protein_coding-promoter-TSS (ENSRNOT00000025618)	90	ENSRNOT00000025618	ENSRNOG00000018916	ENSRNOT00000025618			Bcl7c			protein_coding
NA_peak_2490	3	163552992	163552992	+	1074905	NA	exon (ENSRNOT00000049082, exon 1 of 2)	protein_coding-exon (ENSRNOT00000049082, exon 1 of 2)	826	ENSRNOT00000049082	ENSRNOG00000007285	ENSRNOT00000049082			Tp53rk			protein_coding
NA_peak_3419	7	118396294	118396294	+	1074905	NA	exon (ENSRNOT00000066431, exon 1 of 13)	protein_coding-exon (ENSRNOT00000066431, exon 1 of 13)	434	ENSRNOT00000066431	ENSRNOG00000004688	ENSRNOT00000090370			Rbfox2			protein_coding
NA_peak_525	10	46906257	46906257	+	1074905	NA	exon (ENSRNOT00000034006, exon 1 of 4)	protein_coding-exon (ENSRNOT00000034006, exon 1 of 4)	142	ENSRNOT00000034006	ENSRNOG00000028341	ENSRNOT00000034006			Alkbh5			protein_coding
NA_peak_23	1	21067216	21067216	+	1074905	NA	Intergenic	Intergenic	-74754	ENSRNOT00000017617	ENSRNOG00000013202	ENSRNOT00000017617			Akap7			protein_coding
NA_peak_3347	7	63578154	63578154	+	1074905	NA	intron (ENSRNOT00000007295, intron 1 of 4)	protein_coding-intron (ENSRNOT00000007295, intron 1 of 4)	336	ENSRNOT00000007295	ENSRNOG00000005388	ENSRNOT00000007295			Rassf3			protein_coding
NA_peak_1280	15	25933155	25933155	+	1074905	NA	promoter-TSS (ENSRNOT00000018972)	protein_coding-promoter-TSS (ENSRNOT00000018972)	113	ENSRNOT00000067735	ENSRNOG00000013804	ENSRNOT00000067735			Exoc5			protein_coding
NA_peak_246	1	198459676	198459676	+	1074905	NA	exon (ENSRNOT00000082940, exon 3 of 6)	protein_coding-exon (ENSRNOT00000082940, exon 3 of 6)	450	ENSRNOT00000082940	ENSRNOG00000055082	ENSRNOT00000082940			Maz			protein_coding
NA_peak_3883	9	113504354	113504354	+	1074905	NA	intron (ENSRNOT00000067974, intron 1 of 6)	protein_coding-intron (ENSRNOT00000067974, intron 1 of 6)	251	ENSRNOT00000067974	ENSRNOG00000042189	ENSRNOT00000067974			Rab31			protein_coding
NA_peak_3384	7	80713543	80713543	+	1074905	NA	intron (ENSRNOT00000091355, intron 3 of 15)	protein_coding-intron (ENSRNOT00000078354, intron 1 of 13)	170	ENSRNOT00000078354	ENSRNOG00000056487	ENSRNOT00000079962			Oxr1			protein_coding
NA_peak_2574	4	27966405	27966405	+	1074905	NA	promoter-TSS (ENSRNOT00000012597)	protein_coding-promoter-TSS (ENSRNOT00000012597)	-7	ENSRNOT00000012597	ENSRNOG00000009258	ENSRNOT00000012597			Cdk6			protein_coding
NA_peak_3472	7	132200636	132200636	+	1074905	NA	Intergenic	Intergenic	-57166	ENSRNOT00000044092	ENSRNOG00000014844	ENSRNOT00000055742			Kif21a			protein_coding
NA_peak_1287	15	33074680	33074680	+	1074905	NA	exon (ENSRNOT00000075610, exon 1 of 10)	protein_coding-exon (ENSRNOT00000075610, exon 1 of 10)	239	ENSRNOT00000075610	ENSRNOG00000010947	ENSRNOT00000075610			Mmp14			protein_coding
NA_peak_3769	9	28659678	28659678	+	1074905	NA	exon (ENSRNOT00000015453, exon 7 of 31)	protein_coding-exon (ENSRNOT00000015453, exon 7 of 31)	73241	ENSRNOT00000083915	ENSRNOG00000011000	ENSRNOT00000015453			Rims1			protein_coding
NA_peak_3513	7	142899444	142899444	+	1074905	NA	Intergenic	Intergenic	-6314	ENSRNOT00000078663	ENSRNOG00000007607	ENSRNOT00000010171			Nr4a1			protein_coding
NA_peak_621	10	83888698	83888698	+	1074905	NA	exon (ENSRNOT00000055500, exon 1 of 7)	protein_coding-exon (ENSRNOT00000055500, exon 1 of 7)	125	ENSRNOT00000055500	ENSRNOG00000006868	ENSRNOT00000055500			Ube2z			protein_coding
NA_peak_3530	8	13262223	13262223	+	1074905	NA	exon (ENSRNOT00000012176, exon 1 of 1)	protein_coding-exon (ENSRNOT00000012176, exon 1 of 1)	506	ENSRNOT00000012176	ENSRNOG00000009157	ENSRNOT00000012176			Fut4			protein_coding
NA_peak_1457	16	71319198	71319198	+	1074905	NA	promoter-TSS (ENSRNOT00000050980)	protein_coding-promoter-TSS (ENSRNOT00000050980)	-146	ENSRNOT00000050980	ENSRNOG00000016050	ENSRNOT00000050980			Fgfr1			protein_coding
NA_peak_404	1	266731908	266731908	+	1074905	NA	intron (ENSRNOT00000027351, intron 1 of 17)	protein_coding-intron (ENSRNOT00000027351, intron 1 of 17)	24653	ENSRNOT00000063114	ENSRNOG00000041361	ENSRNOT00000063114			AC097752.1			miRNA
NA_peak_3091	6	27721260	27721260	+	1074905	NA	promoter-TSS (ENSRNOT00000071425)	protein_coding-promoter-TSS (ENSRNOT00000071425)	-140	ENSRNOT00000071425	ENSRNOG00000047088	ENSRNOT00000071425			Rab10			protein_coding
NA_peak_2623	4	77709924	77709924	+	1074905	NA	Intergenic	Intergenic	-2930	ENSRNOT00000038517	ENSRNOG00000033639	ENSRNOT00000038517			Zfp777			protein_coding
NA_peak_1631	18	15921560	15921560	+	1074905	NA	intron (ENSRNOT00000022304, intron 1 of 3)	protein_coding-intron (ENSRNOT00000022304, intron 1 of 3)	174	ENSRNOT00000022304	ENSRNOG00000016562	ENSRNOT00000022304			Zfp24			protein_coding
NA_peak_1277	15	24466780	24466780	+	1074905	NA	Intergenic	Intergenic	-7950	ENSRNOT00000081573	ENSRNOG00000058452	ENSRNOT00000081573			U6			snRNA
NA_peak_1854	19	59502578	59502578	+	1074905	NA	promoter-TSS (ENSRNOT00000075292)	protein_coding-promoter-TSS (ENSRNOT00000075292)	-417	ENSRNOT00000075292	ENSRNOG00000049900	ENSRNOT00000075292			Irf2bp2			protein_coding
NA_peak_1152	14	44866831	44866831	+	1074905	NA	Intergenic	Intergenic	10163	ENSRNOT00000083612	ENSRNOG00000054706	ENSRNOT00000083612			AABR07015007.1			lincRNA
NA_peak_2102	2	251634609	251634609	+	1074905	NA	exon (ENSRNOT00000045016, exon 1 of 6)	protein_coding-exon (ENSRNOT00000045016, exon 1 of 6)	178	ENSRNOT00000045016	ENSRNOG00000014613	ENSRNOT00000045016			Ddah1			protein_coding
NA_peak_816	11	81379998	81379998	+	1074905	NA	promoter-TSS (ENSRNOT00000002484)	protein_coding-promoter-TSS (ENSRNOT00000002484)	-127	ENSRNOT00000089294	ENSRNOG00000001815	ENSRNOT00000002484			Eif4a2			protein_coding
NA_peak_239	1	192933096	192933096	+	1074905	NA	promoter-TSS (ENSRNOT00000035770)	protein_coding-promoter-TSS (ENSRNOT00000035770)	-444	ENSRNOT00000035770	ENSRNOG00000012806	ENSRNOT00000035770			Rbbp6			protein_coding
NA_peak_1518	17	10640279	10640279	+	1074905	NA	intron (ENSRNOT00000064274, intron 1 of 10)	protein_coding-intron (ENSRNOT00000064274, intron 1 of 10)	269	ENSRNOT00000064274	ENSRNOG00000016932	ENSRNOT00000022980			Simc1			protein_coding
NA_peak_644	10	89236402	89236402	+	1074905	NA	exon (ENSRNOT00000027957, exon 1 of 11)	protein_coding-exon (ENSRNOT00000027957, exon 1 of 11)	129	ENSRNOT00000076727	ENSRNOG00000051344	ENSRNOT00000076727			Psme3			protein_coding
NA_peak_1567	17	49957018	49957018	+	1074905	NA	exon (ENSRNOT00000018458, exon 2 of 3)	protein_coding-exon (ENSRNOT00000018458, exon 2 of 3)	33964	ENSRNOT00000018458	ENSRNOG00000013806	ENSRNOT00000018458			Mplkip			protein_coding
NA_peak_358	1	247084396	247084396	+	1074905	NA	exon (ENSRNOT00000020475, exon 1 of 1)	protein_coding-exon (ENSRNOT00000020475, exon 1 of 1)	168	ENSRNOT00000020475	ENSRNOG00000015268	ENSRNOT00000020475			Plpp6			protein_coding
NA_peak_102	1	85324136	85324136	+	1074905	NA	promoter-TSS (ENSRNOT00000093693)	protein_coding-promoter-TSS (ENSRNOT00000093693)	57	ENSRNOT00000093693	ENSRNOG00000019831	ENSRNOT00000026839			Samd4b			protein_coding
NA_peak_1294	15	34167897	34167897	+	1074905	NA	promoter-TSS (ENSRNOT00000032252)	protein_coding-promoter-TSS (ENSRNOT00000032252)	-48	ENSRNOT00000032252	ENSRNOG00000025518	ENSRNOT00000032252			Carmil3			protein_coding
NA_peak_3743	9	10380927	10380927	+	1074905	NA	Intergenic	Intergenic	-10990	ENSRNOT00000071228	ENSRNOG00000049785	ENSRNOT00000072009			Ranbp3			protein_coding
NA_peak_1845	19	57484300	57484300	+	1074905	NA	promoter-TSS (ENSRNOT00000025695)	protein_coding-promoter-TSS (ENSRNOT00000025695)	266	ENSRNOT00000025548	ENSRNOG00000018884	ENSRNOT00000025548			Ttc13			protein_coding
NA_peak_261	1	201110623	201110623	+	1074905	NA	exon (ENSRNOT00000027721, exon 1 of 11)	protein_coding-exon (ENSRNOT00000027721, exon 1 of 11)	305	ENSRNOT00000027721	ENSRNOG00000020452	ENSRNOT00000027721			Nsmce4a			protein_coding
NA_peak_140	1	114258936	114258936	+	1074905	NA	intron (ENSRNOT00000088459, intron 1 of 30)	protein_coding-intron (ENSRNOT00000016376, intron 1 of 30)	143	ENSRNOT00000016376	ENSRNOG00000011945	ENSRNOT00000016376			Cyfip1			protein_coding
NA_peak_3858	9	93767987	93767987	+	1074905	NA	intron (ENSRNOT00000025779, intron 4 of 19)	protein_coding-intron (ENSRNOT00000025779, intron 4 of 19)	-31291	ENSRNOT00000084590	ENSRNOG00000018931	ENSRNOT00000025779			Dis3l2			protein_coding
NA_peak_3714	8	123030792	123030792	+	1074905	NA	Intergenic	Intergenic	-43601	ENSRNOT00000033976	ENSRNOG00000026455	ENSRNOT00000033976			Gpd1l			protein_coding
NA_peak_1296	15	37155362	37155362	+	1074905	NA	Intergenic	Intergenic	-15690	ENSRNOT00000011684	ENSRNOG00000008734	ENSRNOT00000011684			Zmym2			protein_coding
NA_peak_818	11	82465886	82465886	+	1074905	NA	promoter-TSS (ENSRNOT00000036958)	protein_coding-promoter-TSS (ENSRNOT00000036958)	-185	ENSRNOT00000036958	ENSRNOG00000025946	ENSRNOT00000036958			Igf2bp2			protein_coding
NA_peak_2796	5	59348790	59348790	+	1074905	NA	intron (ENSRNOT00000084031, intron 1 of 20)	protein_coding-intron (ENSRNOT00000060264, intron 1 of 19)	150	ENSRNOT00000060264	ENSRNOG00000014863	ENSRNOT00000060264			Reck			protein_coding
NA_peak_1840	19	56054643	56054643	+	1074905	NA	promoter-TSS (ENSRNOT00000051945)	protein_coding-promoter-TSS (ENSRNOT00000051945)	431	ENSRNOT00000022324	ENSRNOG00000016631	ENSRNOT00000022324			Zfp276			protein_coding
NA_peak_3808	9	60843295	60843295	+	1074905	NA	Intergenic	Intergenic	40561	ENSRNOT00000088574	ENSRNOG00000051735	ENSRNOT00000088574			AABR07067749.2			lincRNA
NA_peak_3645	8	78858672	78858672	+	1074905	NA	exon (ENSRNOT00000089335, exon 1 of 22)	protein_coding-exon (ENSRNOT00000089335, exon 1 of 22)	102	ENSRNOT00000089335	ENSRNOG00000055631	ENSRNOT00000090047			Zfp280d			protein_coding
NA_peak_1011	13	56513499	56513499	+	1074905	NA	intron (ENSRNOT00000015596, intron 1 of 10)	protein_coding-intron (ENSRNOT00000015596, intron 1 of 10)	213	ENSRNOT00000015596	ENSRNOG00000011137	ENSRNOT00000015596			Zbtb41			protein_coding
NA_peak_1944	2	102686363	102686363	+	1074905	NA	exon (ENSRNOT00000033940, exon 1 of 1)	protein_coding-exon (ENSRNOT00000033940, exon 1 of 1)	850	ENSRNOT00000033940	ENSRNOG00000021745	ENSRNOT00000033940			Bhlhe22			protein_coding
NA_peak_2211	20	46250486	46250486	+	1074905	NA	promoter-TSS (ENSRNOT00000000334)	protein_coding-promoter-TSS (ENSRNOT00000000334)	71	ENSRNOT00000000334	ENSRNOG00000000304	ENSRNOT00000076522			Cd164			protein_coding
NA_peak_1097	14	5378843	5378843	+	1074905	NA	promoter-TSS (ENSRNOT00000002896)	protein_coding-promoter-TSS (ENSRNOT00000002896)	-117	ENSRNOT00000002896	ENSRNOG00000002122	ENSRNOT00000002896			Lrrc8c			protein_coding
NA_peak_524	10	46784494	46784494	+	1074905	NA	promoter-TSS (ENSRNOT00000004948)	protein_coding-promoter-TSS (ENSRNOT00000004948)	515	ENSRNOT00000005237	ENSRNOG00000003847	ENSRNOT00000005237			Gid4			protein_coding
NA_peak_3585	8	57965052	57965052	+	1074905	NA	promoter-TSS (ENSRNOT00000009497)	protein_coding-promoter-TSS (ENSRNOT00000009497)	64	ENSRNOT00000009497	ENSRNOG00000007177	ENSRNOT00000009497			Poglut3			protein_coding
NA_peak_2682	4	127824724	127824724	+	1074905	NA	intron (ENSRNOT00000068274, intron 1 of 10)	protein_coding-intron (ENSRNOT00000068274, intron 1 of 10)	246	ENSRNOT00000068274	ENSRNOG00000005686	ENSRNOT00000068274			Suclg2			protein_coding
NA_peak_3176	6	105611953	105611953	+	1074905	NA	intron (ENSRNOT00000010022, intron 1 of 35)	protein_coding-intron (ENSRNOT00000010022, intron 1 of 35)	497	ENSRNOT00000010022	ENSRNOG00000007459	ENSRNOT00000010022			Pcnx1			protein_coding
NA_peak_2655	4	112662773	112662773	+	1074905	NA	exon (ENSRNOT00000009104, exon 1 of 16)	protein_coding-exon (ENSRNOT00000009104, exon 1 of 16)	164	ENSRNOT00000009104	ENSRNOG00000006888	ENSRNOT00000009104			Gcfc2			protein_coding
NA_peak_998	13	49850380	49850380	+	1074905	NA	exon (ENSRNOT00000042125, exon 1 of 32)	protein_coding-exon (ENSRNOT00000042125, exon 1 of 32)	191	ENSRNOT00000042125	ENSRNOG00000029938	ENSRNOT00000042125			Pik3c2b			protein_coding
NA_peak_372	1	255040188	255040188	+	1074905	NA	promoter-TSS (ENSRNOT00000092151)	protein_coding-promoter-TSS (ENSRNOT00000092151)	-238	ENSRNOT00000092151	ENSRNOG00000018532	ENSRNOT00000025020			Pcgf5			protein_coding
NA_peak_2508	3	171342432	171342432	+	1074905	NA	intron (ENSRNOT00000071853, intron 1 of 3)	protein_coding-intron (ENSRNOT00000071853, intron 1 of 3)	214	ENSRNOT00000071853	ENSRNOG00000050404	ENSRNOT00000071853			Pmepa1			protein_coding
NA_peak_2046	2	204625657	204625657	+	1074905	NA	promoter-TSS (ENSRNOT00000022182)	protein_coding-promoter-TSS (ENSRNOT00000022182)	86	ENSRNOT00000022182	ENSRNOG00000016477	ENSRNOT00000022182			Vangl1			protein_coding
NA_peak_2167	20	18489619	18489619	+	1074905	NA	exon (ENSRNOT00000000748, exon 1 of 6)	protein_coding-exon (ENSRNOT00000000748, exon 1 of 6)	214	ENSRNOT00000000748	ENSRNOG00000000609	ENSRNOT00000000748			Ipmk			protein_coding
NA_peak_1215	14	86706403	86706403	+	1074905	NA	intron (ENSRNOT00000082893, intron 1 of 4)	protein_coding-intron (ENSRNOT00000082893, intron 1 of 4)	223	ENSRNOT00000082893	ENSRNOG00000052275	ENSRNOT00000082893			H2az2			protein_coding
NA_peak_292	1	219440160	219440160	+	1074905	NA	promoter-TSS (ENSRNOT00000091680)	protein_coding-promoter-TSS (ENSRNOT00000091680)	-32	ENSRNOT00000091680	ENSRNOG00000018708	ENSRNOT00000091680			Ppp1ca			protein_coding
NA_peak_1774	19	30936715	30936715	+	1074905	NA	promoter-TSS (ENSRNOT00000024568)	protein_coding-promoter-TSS (ENSRNOT00000024568)	12	ENSRNOT00000024568	ENSRNOG00000018149	ENSRNOT00000024568			Smarca5			protein_coding
NA_peak_2620	4	77519258	77519258	+	1074905	NA	exon (ENSRNOT00000008743, exon 1 of 6)	protein_coding-exon (ENSRNOT00000008743, exon 1 of 6)	230	ENSRNOT00000008743	ENSRNOG00000006703	ENSRNOT00000008743			Zfp398			protein_coding
NA_peak_3053	5	173372902	173372902	+	1074905	NA	promoter-TSS (ENSRNOT00000077602)	protein_coding-promoter-TSS (ENSRNOT00000077602)	233	ENSRNOT00000026752	ENSRNOG00000019749	ENSRNOT00000026752			Ube2j2			protein_coding
NA_peak_562	10	59765502	59765502	+	1074905	NA	promoter-TSS (ENSRNOT00000030343)	protein_coding-promoter-TSS (ENSRNOT00000030343)	244	ENSRNOT00000026351	ENSRNOG00000019458	ENSRNOT00000026351			Shpk			protein_coding
NA_peak_3163	6	102215491	102215491	+	1074905	NA	promoter-TSS (ENSRNOT00000014257)	protein_coding-promoter-TSS (ENSRNOT00000014257)	-112	ENSRNOT00000014257	ENSRNOG00000010650	ENSRNOT00000014257			Plekhh1			protein_coding
NA_peak_3927	X	44831031	44831031	+	1074905	NA	exon (ENSRNOT00000079680, exon 1 of 16)	protein_coding-exon (ENSRNOT00000079680, exon 1 of 16)	182	ENSRNOT00000079680	ENSRNOG00000003686	ENSRNOT00000079680			Tbl1x			protein_coding
NA_peak_3453	7	125649915	125649915	+	1074905	NA	exon (ENSRNOT00000017906, exon 1 of 13)	protein_coding-exon (ENSRNOT00000017906, exon 1 of 13)	227	ENSRNOT00000017906	ENSRNOG00000013067	ENSRNOT00000017906			Phf21b			protein_coding
NA_peak_1988	2	147692886	147692886	+	1074905	NA	exon (ENSRNOT00000022507, exon 1 of 7)	protein_coding-exon (ENSRNOT00000022507, exon 1 of 7)	196	ENSRNOT00000022507	ENSRNOG00000016617	ENSRNOT00000022507			Wwtr1			protein_coding
NA_peak_1685	18	56505614	56505614	+	1074905	NA	Intergenic	Intergenic	-4673	ENSRNOT00000024704	ENSRNOG00000018132	ENSRNOT00000024704			Hmgxb3			protein_coding
NA_peak_3330	7	41473624	41473624	+	1074905	NA	Intergenic	Intergenic	-1539	ENSRNOT00000037844	ENSRNOG00000023896	ENSRNOT00000037844			Dusp6			protein_coding
NA_peak_2084	2	238252850	238252850	+	1074905	NA	intron (ENSRNOT00000037154, intron 1 of 12)	protein_coding-intron (ENSRNOT00000037154, intron 1 of 12)	437	ENSRNOT00000037154	ENSRNOG00000011669	ENSRNOT00000037154			Gstcd			protein_coding
NA_peak_3273	7	11908237	11908237	+	1074905	NA	intron (ENSRNOT00000041106, intron 1 of 13)	protein_coding-intron (ENSRNOT00000041106, intron 1 of 13)	130	ENSRNOT00000041106	ENSRNOG00000029028	ENSRNOT00000041106			Mknk2			protein_coding
NA_peak_1632	18	16106591	16106591	+	1074905	NA	Intergenic	Intergenic	30295	ENSRNOT00000082745	ENSRNOG00000059584	ENSRNOT00000082745			U6			snRNA
NA_peak_1749	19	19834750	19834750	+	1074905	NA	Intergenic	Intergenic	-1938	ENSRNOT00000084657	ENSRNOG00000024212	ENSRNOT00000084657			Tent4b			protein_coding
NA_peak_1683	18	55891501	55891501	+	1074905	NA	intron (ENSRNOT00000025934, intron 2 of 3)	protein_coding-intron (ENSRNOT00000025934, intron 2 of 3)	209	ENSRNOT00000064686	ENSRNOG00000019181	ENSRNOT00000025934			Synpo			protein_coding
NA_peak_3667	8	103554620	103554620	+	1074905	NA	promoter-TSS (ENSRNOT00000079965)	protein_coding-promoter-TSS (ENSRNOT00000079965)	-152	ENSRNOT00000089833	ENSRNOG00000054902	ENSRNOT00000089833			Trpc1			protein_coding
NA_peak_2025	2	189627234	189627234	+	1074905	NA	Intergenic	Intergenic	-2063	ENSRNOT00000049810	ENSRNOG00000022373	ENSRNOT00000049810			Dennd4b			protein_coding
NA_peak_3154	6	98566830	98566830	+	1074905	NA	promoter-TSS (ENSRNOT00000077715)	protein_coding-promoter-TSS (ENSRNOT00000077715)	136	ENSRNOT00000006755	ENSRNOG00000005045	ENSRNOT00000006755			Ppp2r5e			protein_coding
NA_peak_1404	16	19894399	19894399	+	1074905	NA	exon (ENSRNOT00000085940, exon 1 of 17)	protein_coding-exon (ENSRNOT00000085940, exon 1 of 17)	192	ENSRNOT00000085940	ENSRNOG00000058662	ENSRNOT00000085940			Ano8			protein_coding
NA_peak_576	10	63829960	63829960	+	1074905	NA	exon (ENSRNOT00000006407, exon 1 of 3)	protein_coding-exon (ENSRNOT00000006407, exon 1 of 3)	153	ENSRNOT00000006407	ENSRNOG00000025792	ENSRNOT00000006407			Crk			protein_coding
NA_peak_1846	19	57649393	57649393	+	1074905	NA	promoter-TSS (ENSRNOT00000038257)	protein_coding-promoter-TSS (ENSRNOT00000038257)	434	ENSRNOT00000026757	ENSRNOG00000019766	ENSRNOT00000026757			Exoc8			protein_coding
NA_peak_841	11	87722403	87722403	+	1074905	NA	promoter-TSS (ENSRNOT00000000313)	protein_coding-promoter-TSS (ENSRNOT00000000313)	53	ENSRNOT00000000313	ENSRNOG00000000288	ENSRNOT00000000313			Scarf2			protein_coding
NA_peak_3426	7	120295417	120295417	+	1074905	NA	exon (ENSRNOT00000014413, exon 1 of 9)	protein_coding-exon (ENSRNOT00000014413, exon 1 of 9)	201	ENSRNOT00000014413	ENSRNOG00000010821	ENSRNOT00000014413			Ankrd54			protein_coding
NA_peak_516	10	45279124	45279124	+	1074905	NA	exon (ENSRNOT00000073082, exon 1 of 4)	protein_coding-exon (ENSRNOT00000073082, exon 1 of 4)	175	ENSRNOT00000073082	ENSRNOG00000049219	ENSRNOT00000073082			Rnf187			protein_coding
NA_peak_1542	17	24182308	24182308	+	1074905	NA	exon (ENSRNOT00000024206, exon 1 of 9)	protein_coding-exon (ENSRNOT00000024206, exon 1 of 9)	117	ENSRNOT00000024206	ENSRNOG00000017988	ENSRNOT00000024206			Mcur1			protein_coding
NA_peak_1469	16	81088901	81088901	+	1074905	NA	promoter-TSS (ENSRNOT00000026150)	protein_coding-promoter-TSS (ENSRNOT00000026150)	-391	ENSRNOT00000087192	ENSRNOG00000019222	ENSRNOT00000087192			Tfdp1			protein_coding
NA_peak_944	12	40860622	40860622	+	1074905	NA	Intergenic	Intergenic	20502	ENSRNOT00000034951	ENSRNOG00000025936	ENSRNOT00000034951			Rpl6			protein_coding
NA_peak_422	1	278198227	278198227	+	1074905	NA	promoter-TSS (ENSRNOT00000023247)	protein_coding-promoter-TSS (ENSRNOT00000023247)	48	ENSRNOT00000023247	ENSRNOG00000017225	ENSRNOT00000023247			Fam160b1			protein_coding
NA_peak_3872	9	100887967	100887967	+	1074905	NA	promoter-TSS (ENSRNOT00000025529)	protein_coding-promoter-TSS (ENSRNOT00000025529)	140	ENSRNOT00000024794	ENSRNOG00000018351	ENSRNOT00000024794			Thap4			protein_coding
NA_peak_1815	19	52086197	52086197	+	1074905	NA	promoter-TSS (ENSRNOT00000020341)	protein_coding-promoter-TSS (ENSRNOT00000020341)	-128	ENSRNOT00000020341	ENSRNOG00000015084	ENSRNOT00000020341			Necab2			protein_coding
NA_peak_3287	7	12518616	12518616	+	1074905	NA	promoter-TSS (ENSRNOT00000018691)	protein_coding-promoter-TSS (ENSRNOT00000018691)	68	ENSRNOT00000093426	ENSRNOG00000013604	ENSRNOT00000093376			Gpx4			protein_coding
NA_peak_21	1	18058033	18058033	+	1074905	NA	promoter-TSS (ENSRNOT00000020988)	protein_coding-promoter-TSS (ENSRNOT00000020988)	22	ENSRNOT00000020988	ENSRNOG00000047605	ENSRNOT00000020988			Ptprk			protein_coding
NA_peak_3222	6	132702980	132702980	+	1074905	NA	exon (ENSRNOT00000005743, exon 1 of 5)	protein_coding-exon (ENSRNOT00000005743, exon 1 of 5)	532	ENSRNOT00000005743	ENSRNOG00000004339	ENSRNOT00000005743			Yy1			protein_coding
NA_peak_888	12	17584198	17584198	+	1074905	NA	exon (ENSRNOT00000035545, exon 1 of 13)	protein_coding-exon (ENSRNOT00000035545, exon 1 of 13)	268	ENSRNOT00000035545	ENSRNOG00000021312	ENSRNOT00000035545			Dnaaf5			protein_coding
NA_peak_341	1	233382713	233382713	+	1074905	NA	promoter-TSS (ENSRNOT00000019174)	protein_coding-promoter-TSS (ENSRNOT00000019174)	5	ENSRNOT00000019174	ENSRNOG00000014183	ENSRNOT00000019174			Gnaq			protein_coding
NA_peak_659	10	91866820	91866820	+	1074905	NA	intron (ENSRNOT00000005176, intron 2 of 4)	protein_coding-intron (ENSRNOT00000005176, intron 2 of 4)	36166	ENSRNOT00000005176	ENSRNOG00000003845	ENSRNOT00000005176			Wnt3			protein_coding
NA_peak_1044	13	89660907	89660907	+	1074905	NA	TTS (ENSRNOT00000004938)	protein_coding-TTS (ENSRNOT00000004938)	243	ENSRNOT00000058390	ENSRNOG00000038347	ENSRNOT00000058390			Usp21			protein_coding
NA_peak_3833	9	73204690	73204690	+	1074905	NA	Intergenic	Intergenic	-115020	ENSRNOT00000092485	ENSRNOG00000011841	ENSRNOT00000045766			Map2			protein_coding
NA_peak_1773	19	30794094	30794094	+	1074905	NA	promoter-TSS (ENSRNOT00000024390)	protein_coding-promoter-TSS (ENSRNOT00000024390)	-477	ENSRNOT00000024390	ENSRNOG00000017879	ENSRNOT00000083219			Gab1			protein_coding
NA_peak_2276	3	11747089	11747089	+	1074905	NA	promoter-TSS (ENSRNOT00000032893)	protein_coding-promoter-TSS (ENSRNOT00000032893)	24	ENSRNOT00000032893	ENSRNOG00000022586	ENSRNOT00000032893			Cdk9			protein_coding
NA_peak_3186	6	108821051	108821051	+	1074905	NA	exon (ENSRNOT00000006492, exon 2 of 24)	protein_coding-exon (ENSRNOT00000006492, exon 2 of 24)	131	ENSRNOT00000006492	ENSRNOG00000027317	ENSRNOT00000089683			Ylpm1			protein_coding
NA_peak_3128	6	73345424	73345424	+	1074905	NA	promoter-TSS (ENSRNOT00000088378)	protein_coding-promoter-TSS (ENSRNOT00000088378)	32	ENSRNOT00000088378	ENSRNOG00000004696	ENSRNOT00000088378			Arhgap5			protein_coding
NA_peak_1982	2	141276628	141276628	+	1074905	NA	Intergenic	Intergenic	-146121	ENSRNOT00000072748	ENSRNOG00000055814	ENSRNOT00000072748			AABR07010583.1			pseudogene
NA_peak_1531	17	16694996	16694996	+	1074905	NA	exon (ENSRNOT00000021550, exon 1 of 3)	protein_coding-exon (ENSRNOT00000021550, exon 1 of 3)	130	ENSRNOT00000021550	ENSRNOG00000016099	ENSRNOT00000021550			Id4			protein_coding
NA_peak_3450	7	124620501	124620501	+	1074905	NA	intron (ENSRNOT00000017727, intron 1 of 22)	protein_coding-intron (ENSRNOT00000017727, intron 1 of 22)	202	ENSRNOT00000017727	ENSRNOG00000010617	ENSRNOT00000017727			Scube1			protein_coding
NA_peak_2134	20	5865513	5865513	+	1063348	NA	intron (ENSRNOT00000092641, intron 1 of 15)	protein_coding-intron (ENSRNOT00000000612, intron 1 of 17)	262	ENSRNOT00000000612	ENSRNOG00000000511	ENSRNOT00000092641			Srpk1			protein_coding
NA_peak_1431	16	47717316	47717316	+	1063348	NA	promoter-TSS (ENSRNOT00000018689)	protein_coding-promoter-TSS (ENSRNOT00000018689)	-635	ENSRNOT00000018689	ENSRNOG00000013480	ENSRNOT00000018689			Ing2			protein_coding
NA_peak_2265	3	9535009	9535009	+	1063348	NA	Intergenic	Intergenic	6041	ENSRNOT00000089509	ENSRNOG00000056579	ENSRNOT00000089509			AC142138.1			pseudogene
NA_peak_3544	8	25669248	25669248	+	1053490	NA	exon (ENSRNOT00000036738, exon 1 of 23)	protein_coding-exon (ENSRNOT00000036738, exon 1 of 23)	146	ENSRNOT00000036738	ENSRNOG00000026589	ENSRNOT00000036738			Dpy19l1			protein_coding
NA_peak_2527	3	176958543	176958543	+	1053490	NA	intron (ENSRNOT00000078661, intron 1 of 4)	protein_coding-intron (ENSRNOT00000078661, intron 1 of 4)	337	ENSRNOT00000078661	ENSRNOG00000014592	ENSRNOT00000020168			Zbtb46			protein_coding
NA_peak_3037	5	171242965	171242965	+	1053490	NA	promoter-TSS (ENSRNOT00000032859)	protein_coding-promoter-TSS (ENSRNOT00000032859)	68	ENSRNOT00000032859	ENSRNOG00000025034	ENSRNOT00000032859			RGD1304567			protein_coding
NA_peak_3929	X	63204027	63204027	+	1052075	NA	promoter-TSS (ENSRNOT00000065194)	protein_coding-promoter-TSS (ENSRNOT00000065194)	-384	ENSRNOT00000065194	ENSRNOG00000005624	ENSRNOT00000076974			Zfx			protein_coding
NA_peak_3	1	1885694	1885694	+	1052075	NA	promoter-TSS (ENSRNOT00000082003)	pseudogene-promoter-TSS (ENSRNOT00000082003)	-182	ENSRNOT00000082003	ENSRNOG00000055508	ENSRNOT00000082003			AABR07000159.3			pseudogene
NA_peak_3284	7	12404774	12404774	+	1052075	NA	intron (ENSRNOT00000021648, intron 1 of 6)	protein_coding-intron (ENSRNOT00000021648, intron 1 of 6)	248	ENSRNOT00000021648	ENSRNOG00000015999	ENSRNOT00000021648			Cirbp			protein_coding
NA_peak_3763	9	17342170	17342170	+	1052075	NA	intron (ENSRNOT00000085241, intron 1 of 1)	protein_coding-intron (ENSRNOT00000026559, intron 1 of 6)	826	ENSRNOT00000085241	ENSRNOG00000019598	ENSRNOT00000083811			Vegfa			protein_coding
NA_peak_3443	7	123259504	123259504	+	1052075	NA	promoter-TSS (ENSRNOT00000008819)	protein_coding-promoter-TSS (ENSRNOT00000008819)	132	ENSRNOT00000007424	ENSRNOG00000005577	ENSRNOT00000007424			Desi1			protein_coding
NA_peak_1448	16	62240035	62240035	+	1052075	NA	promoter-TSS (ENSRNOT00000020252)	protein_coding-promoter-TSS (ENSRNOT00000020252)	-48	ENSRNOT00000020252	ENSRNOG00000014915	ENSRNOT00000020252			Gsr			protein_coding
NA_peak_2837	5	79382093	79382093	+	1052075	NA	promoter-TSS (ENSRNOT00000085461)	protein_coding-promoter-TSS (ENSRNOT00000085461)	-3	ENSRNOT00000085461	ENSRNOG00000008712	ENSRNOT00000085461			Tmem268			protein_coding
NA_peak_2890	5	136023281	136023281	+	1052075	NA	promoter-TSS (ENSRNOT00000087225)	snoRNA-promoter-TSS (ENSRNOT00000087225)	-10	ENSRNOT00000089240	ENSRNOG00000054324	ENSRNOT00000089240			SNORD39			snoRNA
NA_peak_3066	6	7073982	7073982	+	1052075	NA	Intergenic	Intergenic	-15668	ENSRNOT00000045996	ENSRNOG00000031263	ENSRNOT00000045996			Haao			protein_coding
NA_peak_1144	14	42402139	42402139	+	1052075	NA	promoter-TSS (ENSRNOT00000092933)	protein_coding-promoter-TSS (ENSRNOT00000092933)	58	ENSRNOT00000092933	ENSRNOG00000053303	ENSRNOT00000092933			Bend4			protein_coding
NA_peak_3774	9	37973621	37973621	+	1052075	NA	intron (ENSRNOT00000044452, intron 58 of 99)	protein_coding-intron (ENSRNOT00000044452, intron 58 of 99)	198310	ENSRNOT00000082531	ENSRNOG00000013234	ENSRNOT00000082531			Ccdc115			protein_coding
NA_peak_822	11	83412895	83412895	+	1052075	NA	exon (ENSRNOT00000084186, exon 1 of 2)	lincRNA-exon (ENSRNOT00000084186, exon 1 of 2)	172	ENSRNOT00000084186	ENSRNOG00000056559	ENSRNOT00000084186			AABR07034669.1			lincRNA
NA_peak_886	12	16934445	16934445	+	1052075	NA	intron (ENSRNOT00000001720, intron 1 of 2)	protein_coding-intron (ENSRNOT00000001720, intron 1 of 2)	261	ENSRNOT00000001720	ENSRNOG00000001277	ENSRNOT00000001720			Mafk			protein_coding
NA_peak_1085	13	110864785	110864785	+	1052075	NA	promoter-TSS (ENSRNOT00000073588)	protein_coding-promoter-TSS (ENSRNOT00000073588)	-316	ENSRNOT00000073588	ENSRNOG00000046445	ENSRNOT00000073588			Rcor3			protein_coding
NA_peak_1492	17	6665266	6665266	+	1052075	NA	promoter-TSS (ENSRNOT00000025980)	protein_coding-promoter-TSS (ENSRNOT00000025980)	-393	ENSRNOT00000025980	ENSRNOG00000019113	ENSRNOT00000025980			Hnrnpk			protein_coding
NA_peak_2507	3	171038169	171038169	+	1052075	NA	exon (ENSRNOT00000008764, exon 1 of 4)	protein_coding-exon (ENSRNOT00000008764, exon 1 of 4)	212	ENSRNOT00000008764	ENSRNOG00000006420	ENSRNOT00000008764			Rbm38			protein_coding
NA_peak_2283	3	14169741	14169741	+	1052075	NA	intron (ENSRNOT00000025534, intron 10 of 47)	protein_coding-intron (ENSRNOT00000025534, intron 10 of 47)	-22320	ENSRNOT00000092782	ENSRNOG00000062165	ENSRNOT00000092782			AABR07051501.1			protein_coding
NA_peak_1183	14	81069317	81069317	+	1052075	NA	Intergenic	Intergenic	-15411	ENSRNOT00000040215	ENSRNOG00000030568	ENSRNOT00000081570			Rgs12			protein_coding
NA_peak_1873	2	22797959	22797959	+	1052075	NA	exon (ENSRNOT00000016135, exon 1 of 15)	protein_coding-exon (ENSRNOT00000016135, exon 1 of 15)	255	ENSRNOT00000016135	ENSRNOG00000012099	ENSRNOT00000016135			Tent2			protein_coding
NA_peak_3856	9	93546303	93546303	+	1052075	NA	intron (ENSRNOT00000025093, intron 1 of 4)	protein_coding-intron (ENSRNOT00000025093, intron 1 of 4)	907	ENSRNOT00000025093	ENSRNOG00000018584	ENSRNOT00000025093			LOC100359583			protein_coding
NA_peak_3788	9	44658923	44658923	+	1052075	NA	Intergenic	Intergenic	-1144	ENSRNOT00000025098	ENSRNOG00000018593	ENSRNOT00000025098			Txndc9			protein_coding
NA_peak_351	1	242083415	242083415	+	1052075	NA	promoter-TSS (ENSRNOT00000065921)	protein_coding-promoter-TSS (ENSRNOT00000065921)	69	ENSRNOT00000065921	ENSRNOG00000015030	ENSRNOT00000065921			Tjp2			protein_coding
NA_peak_2095	2	244403172	244403172	+	1052075	NA	Intergenic	Intergenic	-32189	ENSRNOT00000021458	ENSRNOG00000015987	ENSRNOT00000084860			Rap1gds1			protein_coding
NA_peak_3071	6	11079437	11079437	+	1052075	NA	Intergenic	Intergenic	7539	ENSRNOT00000080634	ENSRNOG00000054705	ENSRNOT00000080634			AABR07062833.3			snoRNA
NA_peak_2563	4	13405284	13405284	+	1052075	NA	exon (ENSRNOT00000091004, exon 1 of 9)	protein_coding-exon (ENSRNOT00000091004, exon 1 of 9)	148	ENSRNOT00000091004	ENSRNOG00000057096	ENSRNOT00000091004			Gnai1			protein_coding
NA_peak_3841	9	82393208	82393208	+	1052075	NA	promoter-TSS (ENSRNOT00000032419)	protein_coding-promoter-TSS (ENSRNOT00000032419)	174	ENSRNOT00000025740	ENSRNOG00000018975	ENSRNOT00000025740			Atg9a			protein_coding
NA_peak_2778	5	35834870	35834870	+	1052075	NA	Intergenic	Intergenic	-3158	ENSRNOT00000010126	ENSRNOG00000007683	ENSRNOT00000010126			Prdm13			protein_coding
NA_peak_3030	5	169259545	169259545	+	1052075	NA	intron (ENSRNOT00000084487, intron 1 of 21)	protein_coding-intron (ENSRNOT00000064841, intron 1 of 21)	262	ENSRNOT00000084487	ENSRNOG00000022694	ENSRNOT00000082586			Plekhg5			protein_coding
NA_peak_2436	3	147714088	147714088	+	1052075	NA	intron (ENSRNOT00000007558, intron 1 of 12)	protein_coding-intron (ENSRNOT00000007558, intron 1 of 12)	267	ENSRNOT00000007558	ENSRNOG00000005276	ENSRNOT00000007558			Csnk2a1			protein_coding
NA_peak_2896	5	136721138	136721138	+	1052075	NA	intron (ENSRNOT00000026704, intron 1 of 7)	protein_coding-intron (ENSRNOT00000026704, intron 1 of 7)	241	ENSRNOT00000026704	ENSRNOG00000019655	ENSRNOT00000026704			Atp6v0b			protein_coding
NA_peak_1107	14	9141583	9141583	+	1052075	NA	promoter-TSS (ENSRNOT00000092709)	protein_coding-promoter-TSS (ENSRNOT00000092709)	71	ENSRNOT00000092709	ENSRNOG00000061121	ENSRNOT00000092709			Wdfy3			protein_coding
NA_peak_1938	2	94730312	94730312	+	1052075	NA	promoter-TSS (ENSRNOT00000081553)	protein_coding-promoter-TSS (ENSRNOT00000081553)	-4	ENSRNOT00000081553	ENSRNOG00000061862	ENSRNOT00000087598			Zbtb10			protein_coding
NA_peak_765	11	44292961	44292961	+	1052075	NA	promoter-TSS (ENSRNOT00000084060)	protein_coding-promoter-TSS (ENSRNOT00000084060)	-77	ENSRNOT00000084060	ENSRNOG00000055281	ENSRNOT00000084060			Dcbld2			protein_coding
NA_peak_1117	14	13073454	13073454	+	1052075	NA	Intergenic	Intergenic	-15282	ENSRNOT00000071706	ENSRNOG00000002004	ENSRNOT00000002746			Prdm8			protein_coding
NA_peak_1521	17	11683964	11683964	+	1052075	NA	exon (ENSRNOT00000024766, exon 1 of 2)	protein_coding-exon (ENSRNOT00000024766, exon 1 of 2)	102	ENSRNOT00000024766	ENSRNOG00000018355	ENSRNOT00000024766			Msx2			protein_coding
NA_peak_1535	17	18151441	18151441	+	1052075	NA	promoter-TSS (ENSRNOT00000066447)	protein_coding-promoter-TSS (ENSRNOT00000066447)	-541	ENSRNOT00000066447	ENSRNOG00000001455	ENSRNOT00000066447			Kif13a			protein_coding
NA_peak_2017	2	187993899	187993899	+	1052075	NA	exon (ENSRNOT00000027182, exon 1 of 22)	protein_coding-exon (ENSRNOT00000027182, exon 1 of 22)	141	ENSRNOT00000027182	ENSRNOG00000020027	ENSRNOT00000092759			Arhgef2			protein_coding
NA_peak_1266	15	19655338	19655338	+	1052075	NA	promoter-TSS (ENSRNOT00000009404)	protein_coding-promoter-TSS (ENSRNOT00000009404)	43	ENSRNOT00000009404	ENSRNOG00000006462	ENSRNOT00000009404			Ero1a			protein_coding
NA_peak_1254	15	4883124	4883124	+	1052075	NA	promoter-TSS (ENSRNOT00000092002)	protein_coding-promoter-TSS (ENSRNOT00000092002)	91	ENSRNOT00000092002	ENSRNOG00000000340	ENSRNOT00000049255			Rtraf			protein_coding
NA_peak_1800	19	43191848	43191848	+	1052075	NA	exon (ENSRNOT00000025179, exon 1 of 1)	protein_coding-exon (ENSRNOT00000025179, exon 1 of 1)	360	ENSRNOT00000025179	ENSRNOG00000018582	ENSRNOT00000025179			Exosc6			protein_coding
NA_peak_2609	4	66624755	66624755	+	1052075	NA	intron (ENSRNOT00000064891, intron 1 of 14)	protein_coding-intron (ENSRNOT00000064891, intron 1 of 14)	157	ENSRNOT00000064891	ENSRNOG00000007034	ENSRNOT00000064891			Hipk2			protein_coding
NA_peak_3935	X	105835382	105835382	+	1052075	NA	promoter-TSS (ENSRNOT00000042714)	protein_coding-promoter-TSS (ENSRNOT00000042714)	-55	ENSRNOT00000042714	ENSRNOG00000024135	ENSRNOT00000042714			Zmat1			protein_coding
NA_peak_976	12	50269534	50269534	+	1052075	NA	promoter-TSS (ENSRNOT00000086782)	protein_coding-promoter-TSS (ENSRNOT00000086782)	187	ENSRNOT00000079190	ENSRNOG00000061004	ENSRNOT00000079190			Asphd2			protein_coding
NA_peak_8	1	5366278	5366278	+	1052075	NA	promoter-TSS (ENSRNOT00000019918)	protein_coding-promoter-TSS (ENSRNOT00000019918)	-101	ENSRNOT00000019918	ENSRNOG00000014852	ENSRNOT00000019918			Fbxo30			protein_coding
NA_peak_137	1	104314372	104314372	+	1052075	NA	intron (ENSRNOT00000080210, intron 1 of 1)	lincRNA-intron (ENSRNOT00000080210, intron 1 of 1)	27514	ENSRNOT00000080210	ENSRNOG00000058637	ENSRNOT00000079890			AABR07003304.2			lincRNA
NA_peak_2678	4	124080736	124080736	+	1052075	NA	intron (ENSRNOT00000015602, intron 1 of 11)	protein_coding-intron (ENSRNOT00000015602, intron 1 of 11)	170	ENSRNOT00000015602	ENSRNOG00000011391	ENSRNOT00000015602			Rbsn			protein_coding
NA_peak_2156	20	10317485	10317485	+	1052075	NA	Intergenic	Intergenic	-16823	ENSRNOT00000001566	ENSRNOG00000001184	ENSRNOT00000001566			Pknox1			protein_coding
NA_peak_2082	2	232245172	232245172	+	1052075	NA	exon (ENSRNOT00000014510, exon 1 of 2)	protein_coding-exon (ENSRNOT00000014510, exon 1 of 2)	147	ENSRNOT00000014510	ENSRNOG00000010875	ENSRNOT00000014510			Fam241a			protein_coding
NA_peak_2223	3	2159058	2159058	+	1052075	NA	promoter-TSS (ENSRNOT00000010270)	protein_coding-promoter-TSS (ENSRNOT00000010270)	63	ENSRNOT00000010270	ENSRNOG00000007752	ENSRNOT00000010270			Zmynd19			protein_coding
NA_peak_2460	3	153188884	153188884	+	1052075	NA	promoter-TSS (ENSRNOT00000079893)	protein_coding-promoter-TSS (ENSRNOT00000079893)	31	ENSRNOT00000079893	ENSRNOG00000053240	ENSRNOT00000079893			Soga1			protein_coding
NA_peak_2461	3	153189482	153189482	+	1052075	NA	promoter-TSS (ENSRNOT00000079893)	protein_coding-promoter-TSS (ENSRNOT00000079893)	-567	ENSRNOT00000079893	ENSRNOG00000053240	ENSRNOT00000079893			Soga1			protein_coding
NA_peak_2292	3	21957332	21957332	+	1052075	NA	Intergenic	Intergenic	-26509	ENSRNOT00000043621	ENSRNOG00000030143	ENSRNOT00000043621			AABR07051796.1			protein_coding
NA_peak_3111	6	50923656	50923656	+	1052075	NA	promoter-TSS (ENSRNOT00000010631)	protein_coding-promoter-TSS (ENSRNOT00000010631)	-146	ENSRNOT00000010631	ENSRNOG00000007884	ENSRNOT00000010631			Bcap29			protein_coding
NA_peak_3363	7	70556157	70556157	+	1052075	NA	exon (ENSRNOT00000008120, exon 1 of 14)	protein_coding-exon (ENSRNOT00000008120, exon 1 of 14)	133	ENSRNOT00000008120	ENSRNOG00000025481	ENSRNOT00000087495			Dctn2			protein_coding
NA_peak_1395	16	19001152	19001152	+	1052075	NA	promoter-TSS (ENSRNOT00000016355)	protein_coding-promoter-TSS (ENSRNOT00000016355)	91	ENSRNOT00000016355	ENSRNOG00000012270	ENSRNOT00000085462			Med26			protein_coding
NA_peak_1283	15	28377997	28377997	+	1052075	NA	promoter-TSS (ENSRNOT00000078475)	protein_coding-promoter-TSS (ENSRNOT00000078475)	1	ENSRNOT00000078475	ENSRNOG00000052354	ENSRNOT00000078475			Arhgef40			protein_coding
NA_peak_1729	19	994212	994212	+	1052075	NA	Intergenic	Intergenic	-10656	ENSRNOT00000064781	ENSRNOG00000013301	ENSRNOT00000017774			Bean1			protein_coding
NA_peak_1221	14	103322606	103322606	+	1052075	NA	Intergenic	Intergenic	-1336	ENSRNOT00000006157	ENSRNOG00000004606	ENSRNOT00000006157			Meis1			protein_coding
NA_peak_371	1	254975201	254975201	+	1052075	NA	intron (ENSRNOT00000025020, intron 1 of 8)	protein_coding-intron (ENSRNOT00000025020, intron 1 of 8)	412	ENSRNOT00000025020	ENSRNOG00000018532	ENSRNOT00000025020			Pcgf5			protein_coding
NA_peak_3133	6	75865199	75865199	+	1052075	NA	intron (ENSRNOT00000009080, intron 2 of 25)	protein_coding-intron (ENSRNOT00000009080, intron 2 of 25)	9036	ENSRNOT00000009080	ENSRNOG00000006828	ENSRNOT00000009080			Baz1a			protein_coding
NA_peak_939	12	40016717	40016717	+	1052075	NA	Intergenic	Intergenic	-2220	ENSRNOT00000001697	ENSRNOG00000001259	ENSRNOT00000001697			Cux2			protein_coding
NA_peak_2404	3	118136849	118136849	+	1052075	NA	promoter-TSS (ENSRNOT00000083356)	protein_coding-promoter-TSS (ENSRNOT00000083356)	11	ENSRNOT00000083356	ENSRNOG00000009289	ENSRNOT00000083356			Galk2			protein_coding
NA_peak_207	1	166911525	166911525	+	1052075	NA	exon (ENSRNOT00000066915, exon 1 of 27)	protein_coding-exon (ENSRNOT00000066915, exon 1 of 27)	169	ENSRNOT00000066915	ENSRNOG00000019730	ENSRNOT00000092952			Inppl1			protein_coding
NA_peak_2114	20	1874791	1874791	+	1052075	NA	exon (ENSRNOT00000000994, exon 1 of 1)	unprocessed_pseudogene-exon (ENSRNOT00000000994, exon 1 of 1)	409	ENSRNOT00000000994	ENSRNOG00000000767	ENSRNOT00000000994			AC112568.1			unprocessed_pseudogene
NA_peak_3237	6	137786226	137786226	+	1052075	NA	exon (ENSRNOT00000019768, exon 1 of 4)	protein_coding-exon (ENSRNOT00000019768, exon 1 of 4)	244	ENSRNOT00000019768	ENSRNOG00000014693	ENSRNOT00000019768			Btbd6			protein_coding
NA_peak_486	10	31532459	31532459	+	1052075	NA	intron (ENSRNOT00000009238, intron 1 of 2)	protein_coding-intron (ENSRNOT00000009238, intron 1 of 2)	209	ENSRNOT00000009238	ENSRNOG00000007053	ENSRNOT00000009238			Med7			protein_coding
NA_peak_1580	17	63426458	63426458	+	1046336	NA	Intergenic	Intergenic	161014	ENSRNOT00000058548	ENSRNOG00000015888	ENSRNOT00000058548			Larp4b			protein_coding
NA_peak_978	12	51250860	51250860	+	1044633	NA	promoter-TSS (ENSRNOT00000029508)	protein_coding-promoter-TSS (ENSRNOT00000029508)	-630	ENSRNOT00000029508	ENSRNOG00000027489	ENSRNOT00000029508			Mn1			protein_coding
NA_peak_2917	5	142643737	142643737	+	1044633	NA	exon (ENSRNOT00000074492, exon 1 of 2)	pseudogene-exon (ENSRNOT00000074492, exon 1 of 2)	138	ENSRNOT00000074492	ENSRNOG00000047686	ENSRNOT00000074492			Pou3f1			pseudogene
NA_peak_1619	18	3995925	3995925	+	1044633	NA	promoter-TSS (ENSRNOT00000091424)	protein_coding-promoter-TSS (ENSRNOT00000091424)	4	ENSRNOT00000091424	ENSRNOG00000050949	ENSRNOT00000073509			Ttc39c			protein_coding
NA_peak_2607	4	66166261	66166261	+	1044633	NA	exon (ENSRNOT00000064175, exon 1 of 18)	protein_coding-exon (ENSRNOT00000064175, exon 1 of 18)	416	ENSRNOT00000064175	ENSRNOG00000005564	ENSRNOT00000064175			Ubn2			protein_coding
NA_peak_179	1	146289356	146289356	+	1041158	NA	exon (ENSRNOT00000017362, exon 1 of 3)	protein_coding-exon (ENSRNOT00000017362, exon 1 of 3)	109	ENSRNOT00000017362	ENSRNOG00000012683	ENSRNOT00000017362			Abhd17c			protein_coding
NA_peak_1440	16	55002241	55002241	+	1041158	NA	promoter-TSS (ENSRNOT00000036092)	protein_coding-promoter-TSS (ENSRNOT00000036092)	81	ENSRNOT00000036092	ENSRNOG00000022686	ENSRNOT00000036092			Zdhhc2			protein_coding
NA_peak_2538	4	6084058	6084058	+	1041158	NA	intron (ENSRNOT00000093625, intron 1 of 53)	protein_coding-intron (ENSRNOT00000093625, intron 1 of 53)	322	ENSRNOT00000093625	ENSRNOG00000061080	ENSRNOT00000010349			Kmt2c			protein_coding
NA_peak_840	11	87678130	87678130	+	1041158	NA	promoter-TSS (ENSRNOT00000091675)	protein_coding-promoter-TSS (ENSRNOT00000091675)	164	ENSRNOT00000068711	ENSRNOG00000001878	ENSRNOT00000068711			Klhl22			protein_coding
NA_peak_2925	5	144114221	144114221	+	1041158	NA	intron (ENSRNOT00000035597, intron 1 of 10)	protein_coding-intron (ENSRNOT00000035597, intron 1 of 10)	209	ENSRNOT00000035597	ENSRNOG00000025679	ENSRNOT00000035597			Stk40			protein_coding
NA_peak_178	1	146030268	146030268	+	1041158	NA	promoter-TSS (ENSRNOT00000016455)	protein_coding-promoter-TSS (ENSRNOT00000016455)	-428	ENSRNOT00000016455	ENSRNOG00000012349	ENSRNOT00000016455			Tlnrd1			protein_coding
NA_peak_1797	19	41798105	41798105	+	1041158	NA	intron (ENSRNOT00000021744, intron 1 of 18)	protein_coding-intron (ENSRNOT00000021744, intron 1 of 18)	278	ENSRNOT00000021744	ENSRNOG00000016108	ENSRNOT00000021744			Phlpp2			protein_coding
NA_peak_2270	3	10602928	10602928	+	1041158	NA	promoter-TSS (ENSRNOT00000011648)	protein_coding-promoter-TSS (ENSRNOT00000011648)	-256	ENSRNOT00000011648	ENSRNOG00000008761	ENSRNOT00000011648			Ncs1			protein_coding
NA_peak_796	11	71388500	71388500	+	1041158	NA	promoter-TSS (ENSRNOT00000002411)	protein_coding-promoter-TSS (ENSRNOT00000002411)	-508	ENSRNOT00000002411	ENSRNOG00000001769	ENSRNOT00000084768			Tnk2			protein_coding
NA_peak_3701	8	118013875	118013875	+	1032473	NA	intron (ENSRNOT00000056166, intron 1 of 16)	protein_coding-intron (ENSRNOT00000056166, intron 1 of 16)	263	ENSRNOT00000056166	ENSRNOG00000020748	ENSRNOT00000056161			Map4			protein_coding
NA_peak_1041	13	88536411	88536411	+	1032473	NA	exon (ENSRNOT00000003950, exon 2 of 9)	protein_coding-exon (ENSRNOT00000003950, exon 2 of 9)	317	ENSRNOT00000003950	ENSRNOG00000002941	ENSRNOT00000003950			Uhmk1			protein_coding
NA_peak_2927	5	144436668	144436668	+	1032473	NA	promoter-TSS (ENSRNOT00000042371)	protein_coding-promoter-TSS (ENSRNOT00000042371)	-159	ENSRNOT00000042371	ENSRNOG00000034269	ENSRNOT00000042371			2003-08-01			protein_coding
NA_peak_687	10	104407419	104407419	+	1032473	NA	Intergenic	Intergenic	29671	ENSRNOT00000080714	ENSRNOG00000004834	ENSRNOT00000006519			Llgl2			protein_coding
NA_peak_3411	7	117151139	117151139	+	1032473	NA	exon (ENSRNOT00000051294, exon 1 of 17)	protein_coding-exon (ENSRNOT00000051294, exon 1 of 17)	117	ENSRNOT00000078846	ENSRNOG00000029535	ENSRNOT00000078846			Nrbp2			protein_coding
NA_peak_3607	8	63803370	63803370	+	1032473	NA	Intergenic	Intergenic	-52839	ENSRNOT00000009496	ENSRNOG00000006490	ENSRNOT00000009496			Neo1			protein_coding
NA_peak_1587	17	76287007	76287007	+	1032473	NA	promoter-TSS (ENSRNOT00000092494)	lincRNA-promoter-TSS (ENSRNOT00000092494)	179	ENSRNOT00000092452	ENSRNOG00000023593	ENSRNOT00000092693			Upf2			protein_coding
NA_peak_1871	2	22195660	22195660	+	1032473	NA	promoter-TSS (ENSRNOT00000065131)	protein_coding-promoter-TSS (ENSRNOT00000065131)	60	ENSRNOT00000065131	ENSRNOG00000024039	ENSRNOT00000065131			Serinc5			protein_coding
NA_peak_1022	13	72893314	72893314	+	1032473	NA	promoter-TSS (ENSRNOT00000004704)	protein_coding-promoter-TSS (ENSRNOT00000004704)	-127	ENSRNOT00000004704	ENSRNOG00000000040	ENSRNOT00000093563			RGD1304622			protein_coding
NA_peak_402	1	266255539	266255539	+	1032473	NA	promoter-TSS (ENSRNOT00000027047)	protein_coding-promoter-TSS (ENSRNOT00000027047)	-258	ENSRNOT00000027047	ENSRNOG00000019968	ENSRNOT00000027047			Trim8			protein_coding
NA_peak_514	10	43598976	43598976	+	1032473	NA	intron (ENSRNOT00000044299, intron 1 of 27)	protein_coding-intron (ENSRNOT00000044299, intron 1 of 27)	256	ENSRNOT00000044299	ENSRNOG00000002645	ENSRNOT00000044299			Gemin5			protein_coding
NA_peak_2583	4	44936513	44936513	+	1032473	NA	intron (ENSRNOT00000090451, intron 1 of 9)	protein_coding-intron (ENSRNOT00000090451, intron 1 of 9)	223	ENSRNOT00000090451	ENSRNOG00000056207	ENSRNOT00000090451			Capza2			protein_coding
NA_peak_3001	5	160086594	160086594	+	1032473	NA	Intergenic	Intergenic	-8833	ENSRNOT00000077609	ENSRNOG00000060917	ENSRNOT00000077609			AABR07050298.1			protein_coding
NA_peak_2478	3	160391233	160391233	+	1032473	NA	exon (ENSRNOT00000016981, exon 1 of 6)	protein_coding-exon (ENSRNOT00000016981, exon 1 of 6)	127	ENSRNOT00000016981	ENSRNOG00000010945	ENSRNOT00000016981			Ywhab			protein_coding
NA_peak_1745	19	19404175	19404175	+	1032473	NA	exon (ENSRNOT00000019130, exon 4 of 4)	protein_coding-exon (ENSRNOT00000019130, exon 4 of 4)	8520	ENSRNOT00000019130	ENSRNOG00000014202	ENSRNOT00000019130			Snx20			protein_coding
NA_peak_3697	8	117307401	117307401	+	1032473	NA	promoter-TSS (ENSRNOT00000064571)	protein_coding-promoter-TSS (ENSRNOT00000064571)	62	ENSRNOT00000064571	ENSRNOG00000025071	ENSRNOT00000064571			Qrich1			protein_coding
NA_peak_955	12	46718645	46718645	+	1032473	NA	promoter-TSS (ENSRNOT00000030031)	protein_coding-promoter-TSS (ENSRNOT00000030031)	-130	ENSRNOT00000080546	ENSRNOG00000059703	ENSRNOT00000080546			AC123425.1			pseudogene
NA_peak_1276	15	24254422	24254422	+	1032473	NA	intron (ENSRNOT00000092161, intron 1 of 3)	protein_coding-intron (ENSRNOT00000092161, intron 1 of 3)	380	ENSRNOT00000092161	ENSRNOG00000011704	ENSRNOT00000092161			Fbxo34			protein_coding
NA_peak_120	1	92776637	92776637	+	1032473	NA	Intergenic	Intergenic	-1662	ENSRNOT00000018931	ENSRNOG00000013938	ENSRNOT00000018931			Tshz3			protein_coding
NA_peak_999	13	50434780	50434780	+	1027222	NA	promoter-TSS (ENSRNOT00000032244)	protein_coding-promoter-TSS (ENSRNOT00000032244)	78	ENSRNOT00000032244	ENSRNOG00000028353	ENSRNOT00000032244			Sox13			protein_coding
NA_peak_2319	3	52212472	52212472	+	1027222	NA	promoter-TSS (ENSRNOT00000007615)	protein_coding-promoter-TSS (ENSRNOT00000007615)	-60	ENSRNOT00000007615	ENSRNOG00000005727	ENSRNOT00000007615			Galnt3			protein_coding
NA_peak_3868	9	99998543	99998543	+	1011987	NA	exon (ENSRNOT00000074395, exon 1 of 9)	protein_coding-exon (ENSRNOT00000074395, exon 1 of 9)	268	ENSRNOT00000074395	ENSRNOG00000049437	ENSRNOT00000074395			Gpc1			protein_coding
NA_peak_2202	20	41083391	41083391	+	1011117	NA	promoter-TSS (ENSRNOT00000000660)	protein_coding-promoter-TSS (ENSRNOT00000000660)	74	ENSRNOT00000000660	ENSRNOG00000000549	ENSRNOT00000000660			Tspyl1			protein_coding
NA_peak_386	1	261158579	261158579	+	1011117	NA	intron (ENSRNOT00000071965, intron 1 of 3)	protein_coding-intron (ENSRNOT00000071965, intron 1 of 3)	318	ENSRNOT00000071965	ENSRNOG00000050585	ENSRNOT00000071965			Pgam1			protein_coding
NA_peak_566	10	62009970	62009970	+	1011117	NA	promoter-TSS (ENSRNOT00000004143)	protein_coding-promoter-TSS (ENSRNOT00000004143)	-388	ENSRNOT00000004143	ENSRNOG00000046405	ENSRNOT00000004143			Hic1			protein_coding
NA_peak_103	1	85438113	85438113	+	1011117	NA	promoter-TSS (ENSRNOT00000048905)	protein_coding-promoter-TSS (ENSRNOT00000048905)	8	ENSRNOT00000048905	ENSRNOG00000032034	ENSRNOT00000093383			Supt5h			protein_coding
NA_peak_2376	3	94036106	94036106	+	1011117	NA	exon (ENSRNOT00000014767, exon 1 of 2)	protein_coding-exon (ENSRNOT00000014767, exon 1 of 2)	201	ENSRNOT00000014767	ENSRNOG00000010963	ENSRNOT00000014767			RGD1563222			protein_coding
NA_peak_3499	7	140640643	140640643	+	1011117	NA	intron (ENSRNOT00000083156, intron 1 of 3)	protein_coding-intron (ENSRNOT00000083156, intron 1 of 3)	310	ENSRNOT00000083156	ENSRNOG00000060728	ENSRNOT00000083156			Tuba1a			protein_coding
NA_peak_2860	5	118893250	118893250	+	1004118	NA	Intergenic	Intergenic	72705	ENSRNOT00000079525	ENSRNOG00000057875	ENSRNOT00000079525			AC121719.1			lincRNA
NA_peak_1423	16	32227365	32227365	+	1004118	NA	intron (ENSRNOT00000013816, intron 1 of 11)	protein_coding-intron (ENSRNOT00000013816, intron 1 of 11)	126	ENSRNOT00000013816	ENSRNOG00000010358	ENSRNOT00000013816			Sh3rf1			protein_coding
NA_peak_753	11	32211488	32211488	+	1004118	NA	intron (ENSRNOT00000087452, intron 1 of 2)	protein_coding-intron (ENSRNOT00000087452, intron 1 of 2)	373	ENSRNOT00000087452	ENSRNOG00000059381	ENSRNOT00000087452			Mrps6			protein_coding
NA_peak_636	10	86711503	86711503	+	1004118	NA	exon (ENSRNOT00000012812, exon 1 of 8)	protein_coding-exon (ENSRNOT00000012812, exon 1 of 8)	263	ENSRNOT00000012812	ENSRNOG00000009643	ENSRNOT00000012812			Msl1			protein_coding
NA_peak_2011	2	186245444	186245444	+	1004118	NA	promoter-TSS (ENSRNOT00000022292)	protein_coding-promoter-TSS (ENSRNOT00000022292)	-83	ENSRNOT00000022292	ENSRNOG00000016550	ENSRNOT00000089339			Dclk2			protein_coding
NA_peak_1898	2	43070668	43070668	+	1004118	NA	Intergenic	Intergenic	-1991	ENSRNOT00000036658	ENSRNOG00000013002	ENSRNOT00000036658			Gpbp1			protein_coding
NA_peak_2231	3	2832471	2832471	+	995515	NA	TTS (ENSRNOT00000061874)	protein_coding-TTS (ENSRNOT00000061874)	226	ENSRNOT00000065410	ENSRNOG00000016795	ENSRNOT00000065410			Rabl6			protein_coding
NA_peak_3706	8	119381906	119381906	+	995515	NA	promoter-TSS (ENSRNOT00000056060)	protein_coding-promoter-TSS (ENSRNOT00000056060)	-105	ENSRNOT00000056060	ENSRNOG00000021047	ENSRNOT00000056060			Lrrfip2			protein_coding
NA_peak_3075	6	21599989	21599989	+	995515	NA	exon (ENSRNOT00000047674, exon 1 of 34)	protein_coding-exon (ENSRNOT00000047674, exon 1 of 34)	462	ENSRNOT00000047674	ENSRNOG00000033090	ENSRNOT00000047674			Ltbp1			protein_coding
NA_peak_400	1	265798188	265798188	+	995515	NA	promoter-TSS (ENSRNOT00000079483)	protein_coding-promoter-TSS (ENSRNOT00000079483)	-21	ENSRNOT00000079483	ENSRNOG00000018468	ENSRNOT00000079483			Ldb1			protein_coding
NA_peak_593	10	67861889	67861889	+	995515	NA	promoter-TSS (ENSRNOT00000031746)	protein_coding-promoter-TSS (ENSRNOT00000031746)	-165	ENSRNOT00000031746	ENSRNOG00000021685	ENSRNOT00000031746			Cdk5r1			protein_coding
NA_peak_2140	20	6960949	6960949	+	995515	NA	promoter-TSS (ENSRNOT00000093172)	protein_coding-promoter-TSS (ENSRNOT00000093172)	213	ENSRNOT00000000635	ENSRNOG00000000527	ENSRNOT00000093697			Mtch1			protein_coding
NA_peak_938	12	39881855	39881855	+	995515	NA	promoter-TSS (ENSRNOT00000083296)	protein_coding-promoter-TSS (ENSRNOT00000083296)	175	ENSRNOT00000048851	ENSRNOG00000001269	ENSRNOT00000083296			Ppp1cc			protein_coding
NA_peak_1180	14	80034317	80034317	+	995515	NA	Intergenic	Intergenic	-46207	ENSRNOT00000090597	ENSRNOG00000060665	ENSRNOT00000090597			Afap1			protein_coding
NA_peak_3612	8	67491938	67491938	+	995515	NA	promoter-TSS (ENSRNOT00000020951)	protein_coding-promoter-TSS (ENSRNOT00000020951)	99	ENSRNOT00000020951	ENSRNOG00000015257	ENSRNOT00000020951			Coro2b			protein_coding
NA_peak_2194	20	33557394	33557394	+	995515	NA	exon (ENSRNOT00000000467, exon 1 of 5)	protein_coding-exon (ENSRNOT00000000467, exon 1 of 5)	342	ENSRNOT00000000467	ENSRNOG00000000411	ENSRNOT00000000467			Nus1			protein_coding
NA_peak_387	1	261229739	261229739	+	995515	NA	promoter-TSS (ENSRNOT00000075531)	protein_coding-promoter-TSS (ENSRNOT00000075531)	392	ENSRNOT00000018485	ENSRNOG00000013813	ENSRNOT00000018485			Ubtd1			protein_coding
NA_peak_2338	3	61634219	61634219	+	995515	NA	exon (ENSRNOT00000002145, exon 1 of 6)	protein_coding-exon (ENSRNOT00000002145, exon 1 of 6)	214	ENSRNOT00000002145	ENSRNOG00000001578	ENSRNOT00000002145			Hoxd4			protein_coding
NA_peak_2253	3	8364159	8364159	+	995515	NA	exon (ENSRNOT00000019500, exon 1 of 13)	protein_coding-exon (ENSRNOT00000019500, exon 1 of 13)	222	ENSRNOT00000019500	ENSRNOG00000014369	ENSRNOT00000019500			Slc27a4			protein_coding
NA_peak_814	11	78029119	78029119	+	995515	NA	promoter-TSS (ENSRNOT00000089540)	protein_coding-promoter-TSS (ENSRNOT00000089540)	81	ENSRNOT00000089540	ENSRNOG00000055751	ENSRNOT00000089540			P3h2			protein_coding
NA_peak_2556	4	9347818	9347818	+	995515	NA	promoter-TSS (ENSRNOT00000061858)	protein_coding-promoter-TSS (ENSRNOT00000061858)	39	ENSRNOT00000061858	ENSRNOG00000021441	ENSRNOT00000010521			Reln			protein_coding
NA_peak_1400	16	19767304	19767304	+	995515	NA	promoter-TSS (ENSRNOT00000051802)	protein_coding-promoter-TSS (ENSRNOT00000051802)	15	ENSRNOT00000092073	ENSRNOG00000032575	ENSRNOT00000051802			Ocel1			protein_coding
NA_peak_731	10	110643936	110643936	+	995515	NA	exon (ENSRNOT00000054913, exon 1 of 39)	protein_coding-exon (ENSRNOT00000054913, exon 1 of 39)	177	ENSRNOT00000054913	ENSRNOG00000036658	ENSRNOT00000054913			Tbcd			protein_coding
NA_peak_682	10	103934479	103934479	+	995515	NA	promoter-TSS (ENSRNOT00000035865)	protein_coding-promoter-TSS (ENSRNOT00000035865)	-318	ENSRNOT00000035865	ENSRNOG00000025815	ENSRNOT00000035865			Cdr2l			protein_coding
NA_peak_3217	6	132089896	132089896	+	995515	NA	promoter-TSS (ENSRNOT00000057171)	protein_coding-promoter-TSS (ENSRNOT00000057171)	-322	ENSRNOT00000083208	ENSRNOG00000006985	ENSRNOT00000083208			Ccnk			protein_coding
NA_peak_3239	6	137824455	137824455	+	995515	NA	intron (ENSRNOT00000056880, intron 1 of 23)	protein_coding-intron (ENSRNOT00000056880, intron 1 of 23)	242	ENSRNOT00000056880	ENSRNOG00000014744	ENSRNOT00000056880			Pacs2			protein_coding
NA_peak_3033	5	169452654	169452654	+	995515	NA	exon (ENSRNOT00000014444, exon 1 of 6)	protein_coding-exon (ENSRNOT00000014444, exon 1 of 6)	161	ENSRNOT00000014444	ENSRNOG00000010718	ENSRNOT00000014444			Gpr153			protein_coding
NA_peak_1248	15	2374775	2374775	+	995515	NA	exon (ENSRNOT00000019644, exon 1 of 2)	protein_coding-exon (ENSRNOT00000019644, exon 1 of 2)	193	ENSRNOT00000019644	ENSRNOG00000014237	ENSRNOT00000019644			Zfp503			protein_coding
NA_peak_2329	3	58164896	58164896	+	991905	NA	promoter-TSS (ENSRNOT00000002078)	protein_coding-promoter-TSS (ENSRNOT00000002078)	-35	ENSRNOT00000002078	ENSRNOG00000001520	ENSRNOT00000002078			Dlx1			protein_coding
NA_peak_3298	7	18553998	18553998	+	991905	NA	intron (ENSRNOT00000036172, intron 1 of 15)	protein_coding-intron (ENSRNOT00000011047, intron 1 of 16)	229	ENSRNOT00000036172	ENSRNOG00000007921	ENSRNOT00000011047			Hnrnpm			protein_coding
NA_peak_1143	14	42401493	42401493	+	991905	NA	promoter-TSS (ENSRNOT00000090148)	protein_coding-promoter-TSS (ENSRNOT00000090148)	-213	ENSRNOT00000090148	ENSRNOG00000053303	ENSRNOT00000092933			Bend4			protein_coding
NA_peak_3305	7	25039222	25039222	+	991905	NA	promoter-TSS (ENSRNOT00000010636)	protein_coding-promoter-TSS (ENSRNOT00000010636)	-113	ENSRNOT00000010636	ENSRNOG00000008061	ENSRNOT00000010636			Nuak1			protein_coding
NA_peak_618	10	82801769	82801769	+	991905	NA	exon (ENSRNOT00000089497, exon 1 of 10)	protein_coding-exon (ENSRNOT00000089497, exon 1 of 10)	1065	ENSRNOT00000089497	ENSRNOG00000052113	ENSRNOT00000089497			Ppp1r9b			protein_coding
NA_peak_2235	3	3691685	3691685	+	991905	NA	exon (ENSRNOT00000061735, exon 1 of 12)	protein_coding-exon (ENSRNOT00000061735, exon 1 of 12)	287	ENSRNOT00000061735	ENSRNOG00000018574	ENSRNOT00000061735			Qsox2			protein_coding
NA_peak_2730	4	162832095	162832095	+	991905	NA	promoter-TSS (ENSRNOT00000081340)	pseudogene-promoter-TSS (ENSRNOT00000081340)	-112	ENSRNOT00000081340	ENSRNOG00000061420	ENSRNOT00000081340			AABR07062154.1			pseudogene
NA_peak_3123	6	71349275	71349275	+	991905	NA	promoter-TSS (ENSRNOT00000068077)	protein_coding-promoter-TSS (ENSRNOT00000068077)	-26	ENSRNOT00000068077	ENSRNOG00000004165	ENSRNOT00000068077			Prkd1			protein_coding
NA_peak_988	13	35858217	35858217	+	991905	NA	exon (ENSRNOT00000003568, exon 1 of 27)	protein_coding-exon (ENSRNOT00000003568, exon 1 of 27)	173	ENSRNOT00000003568	ENSRNOG00000002625	ENSRNOT00000003568			Ptpn4			protein_coding
NA_peak_667	10	94352728	94352728	+	991905	NA	intron (ENSRNOT00000035973, intron 1 of 4)	protein_coding-intron (ENSRNOT00000035973, intron 1 of 4)	152	ENSRNOT00000035973	ENSRNOG00000025448	ENSRNOT00000035973			Limd2			protein_coding
NA_peak_1442	16	59565185	59565185	+	991905	NA	exon (ENSRNOT00000083434, exon 3 of 15)	protein_coding-exon (ENSRNOT00000083434, exon 3 of 15)	766	ENSRNOT00000083434	ENSRNOG00000053706	ENSRNOT00000083434			Lonrf1			protein_coding
NA_peak_3094	6	28205911	28205911	+	991905	NA	Intergenic	Intergenic	-29784	ENSRNOT00000047210	ENSRNOG00000026649	ENSRNOT00000047210			Dnmt3a			protein_coding
NA_peak_1713	18	75453046	75453046	+	991905	NA	Intergenic	Intergenic	-95008	ENSRNOT00000090840	ENSRNOG00000061277	ENSRNOT00000090840			LOC102553737			lincRNA
NA_peak_1160	14	61137122	61137122	+	991905	NA	intron (ENSRNOT00000005126, intron 1 of 13)	protein_coding-intron (ENSRNOT00000005126, intron 1 of 13)	376	ENSRNOT00000005126	ENSRNOG00000003844	ENSRNOT00000005126			Dhx15			protein_coding
NA_peak_3175	6	105611491	105611491	+	991905	NA	promoter-TSS (ENSRNOT00000010022)	protein_coding-promoter-TSS (ENSRNOT00000010022)	35	ENSRNOT00000010022	ENSRNOG00000007459	ENSRNOT00000010022			Pcnx1			protein_coding
NA_peak_2621	4	77554626	77554626	+	991905	NA	intron (ENSRNOT00000037248, intron 1 of 7)	protein_coding-intron (ENSRNOT00000037248, intron 1 of 7)	357	ENSRNOT00000037248	ENSRNOG00000026981	ENSRNOT00000037248			Zfp282			protein_coding
NA_peak_3151	6	94433655	94433655	+	991905	NA	intron (ENSRNOT00000008238, intron 1 of 5)	protein_coding-intron (ENSRNOT00000008238, intron 1 of 5)	4587	ENSRNOT00000008238	ENSRNOG00000005916	ENSRNOT00000008238			Ppm1a			protein_coding
NA_peak_2081	2	232178706	232178706	+	991905	NA	promoter-TSS (ENSRNOT00000055607)	protein_coding-promoter-TSS (ENSRNOT00000055607)	-35	ENSRNOT00000055607	ENSRNOG00000024492	ENSRNOT00000082173			Ap1ar			protein_coding
NA_peak_1968	2	127844247	127844247	+	991905	NA	promoter-TSS (ENSRNOT00000044804)	protein_coding-promoter-TSS (ENSRNOT00000044804)	-328	ENSRNOT00000090861	ENSRNOG00000013940	ENSRNOT00000090861			RGD1565989			lincRNA
NA_peak_3250	7	2787030	2787030	+	991905	NA	promoter-TSS (ENSRNOT00000047530)	protein_coding-promoter-TSS (ENSRNOT00000047530)	-81	ENSRNOT00000086939	ENSRNOG00000029571	ENSRNOT00000047530			Coq10a			protein_coding
NA_peak_541	10	55642318	55642318	+	991905	NA	exon (ENSRNOT00000008507, exon 1 of 1)	protein_coding-exon (ENSRNOT00000008507, exon 1 of 1)	248	ENSRNOT00000008507	ENSRNOG00000006513	ENSRNOT00000008507			Borcs6			protein_coding
NA_peak_62	1	57518246	57518246	+	991405	NA	exon (ENSRNOT00000002040, exon 1 of 6)	protein_coding-exon (ENSRNOT00000002040, exon 1 of 6)	212	ENSRNOT00000002040	ENSRNOG00000001490	ENSRNOT00000002040			Pdcd2			protein_coding
NA_peak_3745	9	10470860	10470860	+	991405	NA	promoter-TSS (ENSRNOT00000072276)	protein_coding-promoter-TSS (ENSRNOT00000072276)	149	ENSRNOT00000072868	ENSRNOG00000050543	ENSRNOT00000072868			Safb			protein_coding
NA_peak_2743	4	180059231	180059231	+	991405	NA	Intergenic	Intergenic	-3568	ENSRNOT00000021623	ENSRNOG00000015986	ENSRNOT00000083173			Rassf8			protein_coding
NA_peak_3215	6	129519229	129519229	+	991405	NA	promoter-TSS (ENSRNOT00000006307)	protein_coding-promoter-TSS (ENSRNOT00000006307)	-480	ENSRNOT00000006307	ENSRNOG00000042427	ENSRNOT00000006307			Gskip			protein_coding
NA_peak_2936	5	147245862	147245862	+	991405	NA	promoter-TSS (ENSRNOT00000089457)	protein_coding-promoter-TSS (ENSRNOT00000089457)	-175	ENSRNOT00000089457	ENSRNOG00000000123	ENSRNOT00000066268			Rnf19b			protein_coding
NA_peak_530	10	47857108	47857108	+	991405	NA	intron (ENSRNOT00000091963, intron 1 of 8)	protein_coding-intron (ENSRNOT00000085703, intron 1 of 9)	218	ENSRNOT00000085703	ENSRNOG00000060550	ENSRNOT00000091963			Epn2			protein_coding
NA_peak_727	10	109967017	109967017	+	991405	NA	promoter-TSS (ENSRNOT00000071645)	protein_coding-promoter-TSS (ENSRNOT00000071645)	-87	ENSRNOT00000071645	ENSRNOG00000046698	ENSRNOT00000085821			Gps1			protein_coding
NA_peak_838	11	87017251	87017251	+	991405	NA	promoter-TSS (ENSRNOT00000051037)	protein_coding-promoter-TSS (ENSRNOT00000051037)	-136	ENSRNOT00000051037	ENSRNOG00000030920	ENSRNOT00000051037			Rtn4r			protein_coding
NA_peak_3495	7	140547209	140547209	+	971598	NA	promoter-TSS (ENSRNOT00000077502)	protein_coding-promoter-TSS (ENSRNOT00000077502)	-301	ENSRNOT00000077502	ENSRNOG00000061499	ENSRNOT00000083354			Kmt2d			protein_coding
NA_peak_3356	7	66596079	66596079	+	970912	NA	TTS (ENSRNOT00000072105)	miRNA-TTS (ENSRNOT00000072105)	337	ENSRNOT00000031191	ENSRNOG00000023202	ENSRNOT00000079410			Usp15			protein_coding
NA_peak_1235	14	108060857	108060857	+	970912	NA	Intergenic	Intergenic	53133	ENSRNOT00000014062	ENSRNOG00000009935	ENSRNOT00000014062			Xpo1			protein_coding
NA_peak_1486	17	4454600	4454600	+	970912	NA	intron (ENSRNOT00000080750, intron 1 of 26)	protein_coding-intron (ENSRNOT00000066950, intron 1 of 25)	101	ENSRNOT00000080750	ENSRNOG00000018198	ENSRNOT00000080750			Dapk1			protein_coding
NA_peak_131	1	101689481	101689481	+	956344	NA	exon (ENSRNOT00000028546, exon 2 of 4)	protein_coding-exon (ENSRNOT00000028546, exon 2 of 4)	1184	ENSRNOT00000091606	ENSRNOG00000021027	ENSRNOT00000028546			Dbp			protein_coding
NA_peak_3796	9	46309323	46309323	+	956344	NA	exon (ENSRNOT00000018684, exon 1 of 7)	protein_coding-exon (ENSRNOT00000018684, exon 1 of 7)	128	ENSRNOT00000018684	ENSRNOG00000013946	ENSRNOT00000018684			Rnf149			protein_coding
NA_peak_697	10	105795345	105795345	+	956344	NA	intron (ENSRNOT00000067739, intron 1 of 2)	protein_coding-intron (ENSRNOT00000067739, intron 1 of 2)	613	ENSRNOT00000067739	ENSRNOG00000000248	ENSRNOT00000067739			Srsf2			protein_coding
NA_peak_3208	6	126582428	126582428	+	956344	NA	promoter-TSS (ENSRNOT00000010656)	protein_coding-promoter-TSS (ENSRNOT00000010656)	-294	ENSRNOT00000080829	ENSRNOG00000008051	ENSRNOT00000010656			Itpk1			protein_coding
NA_peak_1764	19	25311072	25311072	+	956344	NA	Intergenic	Intergenic	-7510	ENSRNOT00000053767	ENSRNOG00000035644	ENSRNOT00000053767			Mir23a			miRNA
NA_peak_1410	16	20578180	20578180	+	956344	NA	promoter-TSS (ENSRNOT00000026713)	protein_coding-promoter-TSS (ENSRNOT00000026713)	49	ENSRNOT00000026713	ENSRNOG00000019698	ENSRNOT00000026713			Ssbp4			protein_coding
NA_peak_3379	7	77327763	77327763	+	956344	NA	Intergenic	Intergenic	44635	ENSRNOT00000079644	ENSRNOG00000005333	ENSRNOT00000007999			Azin1			protein_coding
NA_peak_2136	20	6049284	6049284	+	956344	NA	promoter-TSS (ENSRNOT00000042143)	protein_coding-promoter-TSS (ENSRNOT00000042143)	-2	ENSRNOT00000042143	ENSRNOG00000028641	ENSRNOT00000092566			Brpf3			protein_coding
NA_peak_3241	6	137911769	137911769	+	956344	NA	Intergenic	Intergenic	-3709	ENSRNOT00000079301	ENSRNOG00000052171	ENSRNOT00000079301			U4			snRNA
NA_peak_1500	17	9109943	9109943	+	956344	NA	exon (ENSRNOT00000016009, exon 1 of 4)	protein_coding-exon (ENSRNOT00000016009, exon 1 of 4)	212	ENSRNOT00000016009	ENSRNOG00000011984	ENSRNOT00000016009			Cxcl14			protein_coding
NA_peak_216	1	175419859	175419859	+	956344	NA	intron (ENSRNOT00000077125, intron 1 of 17)	protein_coding-intron (ENSRNOT00000013126, intron 1 of 39)	247	ENSRNOT00000013126	ENSRNOG00000009812	ENSRNOT00000013126			Sbf2			protein_coding
NA_peak_3677	8	108958663	108958663	+	956344	NA	intron (ENSRNOT00000079618, intron 1 of 33)	protein_coding-intron (ENSRNOT00000066917, intron 1 of 30)	564	ENSRNOT00000066917	ENSRNOG00000015389	ENSRNOT00000079618			Stag1			protein_coding
NA_peak_1131	14	33010446	33010446	+	956344	NA	exon (ENSRNOT00000002809, exon 1 of 5)	protein_coding-exon (ENSRNOT00000002809, exon 1 of 5)	146	ENSRNOT00000002809	ENSRNOG00000002050	ENSRNOT00000002809			Igfbp7			protein_coding
NA_peak_2271	3	10705764	10705764	+	956344	NA	Intergenic	Intergenic	-11115	ENSRNOT00000037742	ENSRNOG00000023589	ENSRNOT00000093451			Gpr107			protein_coding
NA_peak_1084	13	110677927	110677927	+	956344	NA	exon (ENSRNOT00000006340, exon 1 of 2)	protein_coding-exon (ENSRNOT00000006340, exon 1 of 2)	117	ENSRNOT00000006340	ENSRNOG00000004749	ENSRNOT00000006340			Slc30a1			protein_coding
NA_peak_3036	5	169506351	169506351	+	956344	NA	intron (ENSRNOT00000014904, intron 1 of 3)	protein_coding-intron (ENSRNOT00000014904, intron 1 of 3)	213	ENSRNOT00000014904	ENSRNOG00000011104	ENSRNOT00000014904			LOC100360057			protein_coding
NA_peak_2399	3	114747991	114747991	+	956344	NA	exon (ENSRNOT00000043414, exon 1 of 8)	protein_coding-exon (ENSRNOT00000043414, exon 1 of 8)	581	ENSRNOT00000043414	ENSRNOG00000000169	ENSRNOT00000043414			Spata5l1			protein_coding
NA_peak_2066	2	219457710	219457710	+	956344	NA	exon (ENSRNOT00000064735, exon 1 of 16)	protein_coding-exon (ENSRNOT00000064735, exon 1 of 16)	561	ENSRNOT00000064735	ENSRNOG00000014515	ENSRNOT00000064735			Cdc14a			protein_coding
NA_peak_418	1	276011750	276011750	+	956344	NA	intron (ENSRNOT00000045642, intron 2 of 2)	protein_coding-intron (ENSRNOT00000045642, intron 2 of 2)	601	ENSRNOT00000045642	ENSRNOG00000013993	ENSRNOT00000045642			AABR07007000.1			protein_coding
NA_peak_210	1	170464268	170464268	+	956344	NA	promoter-TSS (ENSRNOT00000024850)	protein_coding-promoter-TSS (ENSRNOT00000024850)	73	ENSRNOT00000024850	ENSRNOG00000018356	ENSRNOT00000024850			Trim3			protein_coding
NA_peak_340	1	231530693	231530693	+	956344	NA	promoter-TSS (ENSRNOT00000018272)	protein_coding-promoter-TSS (ENSRNOT00000018272)	-3	ENSRNOT00000087140	ENSRNOG00000013239	ENSRNOT00000018452			Tle4			protein_coding
NA_peak_1717	18	77535313	77535313	+	956344	NA	intron (ENSRNOT00000090265, intron 1 of 30)	protein_coding-intron (ENSRNOT00000041380, intron 1 of 29)	251	ENSRNOT00000041380	ENSRNOG00000032039	ENSRNOT00000090265			Atp9b			protein_coding
NA_peak_2589	4	51726018	51726018	+	956344	NA	exon (ENSRNOT00000009261, exon 1 of 11)	protein_coding-exon (ENSRNOT00000009261, exon 1 of 11)	194	ENSRNOT00000009261	ENSRNOG00000006975	ENSRNOT00000009261			Wasl			protein_coding
NA_peak_3662	8	94122964	94122964	+	956344	NA	intron (ENSRNOT00000014783, intron 1 of 36)	protein_coding-intron (ENSRNOT00000014783, intron 1 of 36)	236	ENSRNOT00000014783	ENSRNOG00000022847	ENSRNOT00000014783			Dop1a			protein_coding
NA_peak_580	10	64549815	64549815	+	956344	NA	intron (ENSRNOT00000050232, intron 1 of 7)	protein_coding-intron (ENSRNOT00000050232, intron 1 of 7)	330	ENSRNOT00000050232	ENSRNOG00000008178	ENSRNOT00000050232			Nxn			protein_coding
NA_peak_1534	17	18059543	18059543	+	956344	NA	exon (ENSRNOT00000031656, exon 1 of 1)	protein_coding-exon (ENSRNOT00000031656, exon 1 of 1)	161	ENSRNOT00000031656	ENSRNOG00000026286	ENSRNOT00000031656			Nhlrc1			protein_coding
NA_peak_2374	3	92290731	92290731	+	956344	NA	exon (ENSRNOT00000007077, exon 1 of 1)	protein_coding-exon (ENSRNOT00000007077, exon 1 of 1)	188	ENSRNOT00000007077	ENSRNOG00000005347	ENSRNOT00000007077			Fjx1			protein_coding
NA_peak_1663	18	31575013	31575013	+	956344	NA	exon (ENSRNOT00000018499, exon 1 of 8)	protein_coding-exon (ENSRNOT00000018499, exon 1 of 8)	192	ENSRNOT00000018499	ENSRNOG00000013562	ENSRNOT00000018499			Ndfip1			protein_coding
NA_peak_3825	9	68414179	68414179	+	956344	NA	promoter-TSS (ENSRNOT00000040778)	protein_coding-promoter-TSS (ENSRNOT00000040778)	-160	ENSRNOT00000040778	ENSRNOG00000024345	ENSRNOT00000040778			Pard3b			protein_coding
NA_peak_1943	2	100677718	100677718	+	956344	NA	intron (ENSRNOT00000067556, intron 1 of 4)	protein_coding-intron (ENSRNOT00000067556, intron 1 of 4)	307	ENSRNOT00000067556	ENSRNOG00000010084	ENSRNOT00000067556			Ythdf3			protein_coding
NA_peak_3358	7	67117113	67117113	+	956344	NA	promoter-TSS (ENSRNOT00000005798)	protein_coding-promoter-TSS (ENSRNOT00000005798)	-133	ENSRNOT00000005798	ENSRNOG00000004314	ENSRNOT00000066381			Ppm1h			protein_coding
NA_peak_1434	16	49003574	49003574	+	956344	NA	promoter-TSS (ENSRNOT00000089501)	protein_coding-promoter-TSS (ENSRNOT00000089501)	-328	ENSRNOT00000089501	ENSRNOG00000010633	ENSRNOT00000014235			Acsl1			protein_coding
NA_peak_1177	14	79445302	79445302	+	956344	NA	promoter-TSS (ENSRNOT00000037061)	protein_coding-promoter-TSS (ENSRNOT00000037061)	169	ENSRNOT00000008601	ENSRNOG00000006575	ENSRNOT00000008601			Ccdc96			protein_coding
NA_peak_242	1	197590237	197590237	+	956344	NA	promoter-TSS (ENSRNOT00000022502)	protein_coding-promoter-TSS (ENSRNOT00000022502)	40	ENSRNOT00000022502	ENSRNOG00000016722	ENSRNOT00000079044			Xpo6			protein_coding
NA_peak_1388	16	8350445	8350445	+	956344	NA	promoter-TSS (ENSRNOT00000026932)	protein_coding-promoter-TSS (ENSRNOT00000026932)	119	ENSRNOT00000027071	ENSRNOG00000019978	ENSRNOT00000027071			Parg			protein_coding
NA_peak_3614	8	67868478	67868478	+	952295	NA	intron (ENSRNOT00000066009, intron 1 of 13)	protein_coding-intron (ENSRNOT00000066009, intron 1 of 13)	541	ENSRNOT00000066009	ENSRNOG00000034272	ENSRNOT00000066009			Pias1			protein_coding
NA_peak_1203	14	85088311	85088311	+	952295	NA	exon (ENSRNOT00000010690, exon 1 of 17)	protein_coding-exon (ENSRNOT00000010690, exon 1 of 17)	212	ENSRNOT00000010690	ENSRNOG00000007948	ENSRNOT00000010690			Nf2			protein_coding
NA_peak_2491	3	163570698	163570698	+	952295	NA	exon (ENSRNOT00000010054, exon 1 of 39)	protein_coding-exon (ENSRNOT00000010054, exon 1 of 39)	166	ENSRNOT00000010054	ENSRNOG00000007485	ENSRNOT00000010054			Arfgef2			protein_coding
NA_peak_2680	4	126299771	126299771	+	952295	NA	Intergenic	Intergenic	-209520	ENSRNOT00000083740	ENSRNOG00000056316	ENSRNOT00000083740			AABR07061462.1			pseudogene
NA_peak_1895	2	39146864	39146864	+	943575	NA	Intergenic	Intergenic	-138888	ENSRNOT00000064292	ENSRNOG00000014528	ENSRNOT00000064292			Zswim6			protein_coding
NA_peak_1218	14	91555910	91555910	+	943575	NA	exon (ENSRNOT00000039182, exon 1 of 8)	protein_coding-exon (ENSRNOT00000039182, exon 1 of 8)	321	ENSRNOT00000039182	ENSRNOG00000027801	ENSRNOT00000039182			Zpbp			protein_coding
NA_peak_712	10	109073723	109073723	+	943575	NA	promoter-TSS (ENSRNOT00000005379)	protein_coding-promoter-TSS (ENSRNOT00000005379)	45	ENSRNOT00000005379	ENSRNOG00000004014	ENSRNOT00000005379			Chmp6			protein_coding
NA_peak_3318	7	34149586	34149586	+	938540	NA	Intergenic	Intergenic	-26604	ENSRNOT00000079620	ENSRNOG00000056797	ENSRNOT00000079620			AABR07056637.1			lincRNA
NA_peak_3696	8	117280947	117280947	+	938540	NA	TTS (ENSRNOT00000072098)	protein_coding-TTS (ENSRNOT00000072098)	242	ENSRNOT00000085038	ENSRNOG00000049531	ENSRNOT00000085038			Usp19			protein_coding
NA_peak_1801	19	43596551	43596551	+	938540	NA	exon (ENSRNOT00000025625, exon 1 of 7)	protein_coding-exon (ENSRNOT00000025625, exon 1 of 7)	250	ENSRNOT00000025625	ENSRNOG00000018950	ENSRNOT00000025625			Fa2h			protein_coding
NA_peak_2572	4	27473505	27473505	+	938540	NA	promoter-TSS (ENSRNOT00000007940)	protein_coding-promoter-TSS (ENSRNOT00000007940)	28	ENSRNOT00000007940	ENSRNOG00000005502	ENSRNOT00000079571			Ankib1			protein_coding
NA_peak_987	13	26172461	26172461	+	938540	NA	exon (ENSRNOT00000003840, exon 1 of 18)	protein_coding-exon (ENSRNOT00000003840, exon 1 of 18)	218	ENSRNOT00000003840	ENSRNOG00000002821	ENSRNOT00000003840			Phlpp1			protein_coding
NA_peak_1638	18	26213636	26213636	+	938540	NA	Intergenic	Intergenic	-2191	ENSRNOT00000027739	ENSRNOG00000020467	ENSRNOT00000027739			Nrep			protein_coding
NA_peak_1920	2	62236806	62236806	+	938540	NA	intron (ENSRNOT00000036633, intron 1 of 15)	protein_coding-intron (ENSRNOT00000036633, intron 1 of 15)	229	ENSRNOT00000036633	ENSRNOG00000022929	ENSRNOT00000036633			Mtmr12			protein_coding
NA_peak_2213	20	46429493	46429493	+	938540	NA	exon (ENSRNOT00000000327, exon 2 of 4)	protein_coding-exon (ENSRNOT00000000327, exon 2 of 4)	271	ENSRNOT00000076818	ENSRNOG00000000299	ENSRNOT00000000327			Foxo3			protein_coding
NA_peak_500	10	37757378	37757378	+	938540	NA	intron (ENSRNOT00000087555, intron 1 of 2)	protein_coding-intron (ENSRNOT00000008119, intron 1 of 3)	230	ENSRNOT00000087555	ENSRNOG00000006148	ENSRNOT00000008119			RGD1310352			protein_coding
NA_peak_64	1	57819575	57819575	+	938540	NA	Intergenic	Intergenic	-4537	ENSRNOT00000075401	ENSRNOG00000048190	ENSRNOT00000075401			Rgmb			protein_coding
NA_peak_1513	17	10458181	10458181	+	938540	NA	promoter-TSS (ENSRNOT00000089885)	protein_coding-promoter-TSS (ENSRNOT00000089885)	71	ENSRNOT00000089885	ENSRNOG00000017641	ENSRNOT00000060822			Rnf44			protein_coding
NA_peak_1038	13	84618870	84618870	+	938540	NA	intron (ENSRNOT00000089827, intron 1 of 5)	protein_coding-intron (ENSRNOT00000045056, intron 1 of 4)	153	ENSRNOT00000089827	ENSRNOG00000032058	ENSRNOT00000089827			Pogk			protein_coding
NA_peak_97	1	82546573	82546573	+	938540	NA	exon (ENSRNOT00000028100, exon 1 of 15)	protein_coding-exon (ENSRNOT00000028100, exon 1 of 15)	364	ENSRNOT00000028100	ENSRNOG00000020683	ENSRNOT00000028100			Hnrnpul1			protein_coding
NA_peak_2209	20	45458776	45458776	+	938540	NA	exon (ENSRNOT00000000713, exon 1 of 13)	protein_coding-exon (ENSRNOT00000000713, exon 1 of 13)	218	ENSRNOT00000000713	ENSRNOG00000000583	ENSRNOT00000000713			Cdk19			protein_coding
NA_peak_2243	3	6212049	6212049	+	938540	NA	intron (ENSRNOT00000012892, intron 1 of 9)	protein_coding-intron (ENSRNOT00000012892, intron 1 of 9)	260	ENSRNOT00000012892	ENSRNOG00000009446	ENSRNOT00000012892			Rxra			protein_coding
NA_peak_934	12	39325604	39325604	+	938540	NA	promoter-TSS (ENSRNOT00000001752)	protein_coding-promoter-TSS (ENSRNOT00000001752)	69	ENSRNOT00000001752	ENSRNOG00000001300	ENSRNOT00000001752			P2rx4			protein_coding
NA_peak_2159	20	11737047	11737047	+	938540	NA	promoter-TSS (ENSRNOT00000001637)	protein_coding-promoter-TSS (ENSRNOT00000001637)	3	ENSRNOT00000001637	ENSRNOG00000038489	ENSRNOT00000001637			Sumo3			protein_coding
NA_peak_1193	14	82762119	82762119	+	938540	NA	promoter-TSS (ENSRNOT00000057929)	protein_coding-promoter-TSS (ENSRNOT00000057929)	-71	ENSRNOT00000057929	ENSRNOG00000005428	ENSRNOT00000057929			Ctbp1			protein_coding
NA_peak_696	10	105771814	105771814	+	938540	NA	exon (ENSRNOT00000066137, exon 1 of 4)	protein_coding-exon (ENSRNOT00000066137, exon 1 of 4)	158	ENSRNOT00000074286	ENSRNOG00000042915	ENSRNOT00000074286			Mxra7			protein_coding
NA_peak_468	10	15433476	15433476	+	938540	NA	intron (ENSRNOT00000077826, intron 10 of 10)	protein_coding-intron (ENSRNOT00000077826, intron 10 of 10)	-24545	ENSRNOT00000087251	ENSRNOG00000053760	ENSRNOT00000087251			AC126071.2			pseudogene
NA_peak_3579	8	50573301	50573301	+	938540	NA	TTS (ENSRNOT00000025149)	protein_coding-TTS (ENSRNOT00000025149)	275	ENSRNOT00000025232	ENSRNOG00000018665	ENSRNOT00000025232			Bud13			protein_coding
NA_peak_608	10	76040735	76040735	+	938540	NA	promoter-TSS (ENSRNOT00000003164)	protein_coding-promoter-TSS (ENSRNOT00000003164)	-771	ENSRNOT00000003164	ENSRNOG00000025338	ENSRNOT00000003164			Msi2			protein_coding
NA_peak_952	12	45199521	45199521	+	938540	NA	promoter-TSS (ENSRNOT00000075646)	protein_coding-promoter-TSS (ENSRNOT00000075646)	-56	ENSRNOT00000075646	ENSRNOG00000001139	ENSRNOT00000075646			Suds3			protein_coding
NA_peak_1963	2	124401408	124401408	+	938540	NA	exon (ENSRNOT00000058495, exon 2 of 3)	protein_coding-exon (ENSRNOT00000058495, exon 2 of 3)	719	ENSRNOT00000067034	ENSRNOG00000025371	ENSRNOT00000058495			Spry1			protein_coding
NA_peak_444	10	11391953	11391953	+	938540	NA	promoter-TSS (ENSRNOT00000072802)	protein_coding-promoter-TSS (ENSRNOT00000072802)	-672	ENSRNOT00000072802	ENSRNOG00000049768	ENSRNOT00000076022			Adcy9			protein_coding
NA_peak_467	10	15235656	15235656	+	938540	NA	promoter-TSS (ENSRNOT00000027170)	protein_coding-promoter-TSS (ENSRNOT00000027170)	84	ENSRNOT00000027170	ENSRNOG00000020029	ENSRNOT00000027170			Mcrip2			protein_coding
NA_peak_3888	9	113900160	113900160	+	938540	NA	promoter-TSS (ENSRNOT00000016965)	protein_coding-promoter-TSS (ENSRNOT00000016965)	30	ENSRNOT00000016965	ENSRNOG00000042503	ENSRNOT00000016965			Ndufv2			protein_coding
NA_peak_2044	2	203494356	203494356	+	938540	NA	promoter-TSS (ENSRNOT00000021162)	protein_coding-promoter-TSS (ENSRNOT00000021162)	35	ENSRNOT00000021162	ENSRNOG00000015655	ENSRNOT00000021162			Ptgfrn			protein_coding
NA_peak_331	1	226436096	226436096	+	938540	NA	promoter-TSS (ENSRNOT00000007429)	protein_coding-promoter-TSS (ENSRNOT00000007429)	6	ENSRNOT00000036232	ENSRNOG00000026432	ENSRNOT00000035576			Syt7			protein_coding
NA_peak_709	10	108201257	108201257	+	938540	NA	Intergenic	Intergenic	-5040	ENSRNOT00000075440	ENSRNOG00000046207	ENSRNOT00000075440			Cbx4			protein_coding
NA_peak_3708	8	121972788	121972788	+	938540	NA	intron (ENSRNOT00000012114, intron 1 of 17)	protein_coding-intron (ENSRNOT00000012114, intron 1 of 17)	337	ENSRNOT00000012114	ENSRNOG00000008981	ENSRNOT00000012114			Pdcd6ip			protein_coding
NA_peak_910	12	27154183	27154183	+	938540	NA	Intergenic	Intergenic	-1404	ENSRNOT00000044800	ENSRNOG00000034287	ENSRNOT00000044800			AABR07035916.1			protein_coding
NA_peak_867	12	12545817	12545817	+	938540	NA	exon (ENSRNOT00000046381, exon 1 of 13)	protein_coding-exon (ENSRNOT00000046381, exon 1 of 13)	168	ENSRNOT00000092637	ENSRNOG00000025155	ENSRNOT00000046381			Lmtk2			protein_coding
NA_peak_1142	14	38192886	38192886	+	938540	NA	promoter-TSS (ENSRNOT00000077080)	protein_coding-promoter-TSS (ENSRNOT00000077080)	16	ENSRNOT00000077080	ENSRNOG00000058588	ENSRNOT00000077080			Nfxl1			protein_coding
NA_peak_3294	7	13040006	13040006	+	938540	NA	intron (ENSRNOT00000090048, intron 1 of 13)	protein_coding-intron (ENSRNOT00000067771, intron 1 of 12)	102	ENSRNOT00000090048	ENSRNOG00000000175	ENSRNOT00000067771			Mier2			protein_coding
NA_peak_1455	16	71090256	71090256	+	938540	NA	exon (ENSRNOT00000020832, exon 1 of 17)	protein_coding-exon (ENSRNOT00000020832, exon 1 of 17)	211	ENSRNOT00000020832	ENSRNOG00000015501	ENSRNOT00000020832			Ddhd2			protein_coding
NA_peak_3357	7	66802774	66802774	+	938540	NA	promoter-TSS (ENSRNOT00000053765)	miRNA-promoter-TSS (ENSRNOT00000053765)	42	ENSRNOT00000053765	ENSRNOG00000035642	ENSRNOT00000053765			Mirlet7i			miRNA
NA_peak_2131	20	5155045	5155045	+	938540	NA	intron (ENSRNOT00000092322, intron 1 of 30)	protein_coding-intron (ENSRNOT00000092322, intron 1 of 30)	248	ENSRNOT00000092322	ENSRNOG00000000852	ENSRNOT00000001133			Prrc2a			protein_coding
NA_peak_585	10	65424668	65424668	+	938540	NA	exon (ENSRNOT00000018468, exon 1 of 7)	protein_coding-exon (ENSRNOT00000018468, exon 1 of 7)	134	ENSRNOT00000018468	ENSRNOG00000013169	ENSRNOT00000018468			Traf4			protein_coding
NA_peak_123	1	100594119	100594119	+	938540	NA	exon (ENSRNOT00000027062, exon 1 of 7)	protein_coding-exon (ENSRNOT00000027062, exon 1 of 7)	227	ENSRNOT00000027062	ENSRNOG00000019959	ENSRNOT00000027062			Kcnc3			protein_coding
NA_peak_609	10	76183851	76183851	+	938540	NA	Intergenic	Intergenic	-17575	ENSRNOT00000055683	ENSRNOG00000002373	ENSRNOT00000055683			Akap1			protein_coding
NA_peak_1407	16	20040040	20040040	+	938540	NA	promoter-TSS (ENSRNOT00000024866)	protein_coding-promoter-TSS (ENSRNOT00000024866)	71	ENSRNOT00000024866	ENSRNOG00000023317	ENSRNOT00000024866			Colgalt1			protein_coding
NA_peak_2356	3	72273703	72273703	+	938540	NA	exon (ENSRNOT00000038250, exon 3 of 3)	protein_coding-exon (ENSRNOT00000038250, exon 3 of 3)	15607	ENSRNOT00000038250	ENSRNOG00000021513	ENSRNOT00000038250			Rtn4rl2			protein_coding
NA_peak_1505	17	9695351	9695351	+	938540	NA	promoter-TSS (ENSRNOT00000036162)	protein_coding-promoter-TSS (ENSRNOT00000036162)	-59	ENSRNOT00000036162	ENSRNOG00000021447	ENSRNOT00000036162			Prr7			protein_coding
NA_peak_1046	13	93535588	93535588	+	938540	NA	Intergenic	Intergenic	25713	ENSRNOT00000030811	ENSRNOG00000021960	ENSRNOT00000030811			AC109958.1			pseudogene
NA_peak_3054	6	788720	788720	+	938540	NA	exon (ENSRNOT00000005983, exon 1 of 17)	protein_coding-exon (ENSRNOT00000005983, exon 1 of 17)	172	ENSRNOT00000005983	ENSRNOG00000004208	ENSRNOT00000005983			Crim1			protein_coding
NA_peak_716	10	109424587	109424587	+	938540	NA	TTS (ENSRNOT00000089388)	lincRNA-TTS (ENSRNOT00000089388)	4401	ENSRNOT00000089388	ENSRNOG00000058777	ENSRNOT00000089388			AABR07030919.1			lincRNA
NA_peak_2745	4	181286468	181286468	+	938540	NA	promoter-TSS (ENSRNOT00000083633)	protein_coding-promoter-TSS (ENSRNOT00000083633)	13	ENSRNOT00000083633	ENSRNOG00000031709	ENSRNOT00000044147			Ppfibp1			protein_coding
NA_peak_3595	8	61079199	61079199	+	938540	NA	promoter-TSS (ENSRNOT00000022976)	protein_coding-promoter-TSS (ENSRNOT00000022976)	327	ENSRNOT00000068658	ENSRNOG00000042519	ENSRNOT00000068658			Peak1			protein_coding
NA_peak_3562	8	48094408	48094408	+	938540	NA	promoter-TSS (ENSRNOT00000008614)	protein_coding-promoter-TSS (ENSRNOT00000008614)	-265	ENSRNOT00000008614	ENSRNOG00000006403	ENSRNOT00000008614			Nectin1			protein_coding
NA_peak_1184	14	81254284	81254284	+	938540	NA	exon (ENSRNOT00000058166, exon 1 of 67)	protein_coding-exon (ENSRNOT00000058166, exon 1 of 67)	353	ENSRNOT00000058166	ENSRNOG00000011073	ENSRNOT00000058166			Htt			protein_coding
NA_peak_1918	2	62034364	62034364	+	938540	NA	intron (ENSRNOT00000074446, intron 1 of 4)	protein_coding-intron (ENSRNOT00000074446, intron 1 of 4)	264	ENSRNOT00000074446	ENSRNOG00000050563	ENSRNOT00000074446			Sub1			protein_coding
NA_peak_1419	16	21438967	21438967	+	938540	NA	Intergenic	Intergenic	-5671	ENSRNOT00000015611	ENSRNOG00000033351	ENSRNOT00000015611			Zfp869			protein_coding
NA_peak_2605	4	65962516	65962516	+	938540	NA	promoter-TSS (ENSRNOT00000040391)	protein_coding-promoter-TSS (ENSRNOT00000040391)	23	ENSRNOT00000040391	ENSRNOG00000013729	ENSRNOT00000040391			RGD1306271			protein_coding
NA_peak_3752	9	15306351	15306351	+	938540	NA	intron (ENSRNOT00000019404, intron 1 of 6)	protein_coding-intron (ENSRNOT00000019404, intron 1 of 6)	114	ENSRNOT00000019404	ENSRNOG00000014328	ENSRNOT00000019404			Frs3			protein_coding
NA_peak_1013	13	60529984	60529984	+	938540	NA	promoter-TSS (ENSRNOT00000060062)	protein_coding-promoter-TSS (ENSRNOT00000060062)	52	ENSRNOT00000060062	ENSRNOG00000003385	ENSRNOT00000060062			Glrx2			protein_coding
NA_peak_329	1	226292512	226292512	+	938540	NA	promoter-TSS (ENSRNOT00000039133)	protein_coding-promoter-TSS (ENSRNOT00000039133)	-32	ENSRNOT00000039133	ENSRNOG00000028274	ENSRNOT00000039133			Myrf			protein_coding
NA_peak_3656	8	85221274	85221274	+	938540	NA	Intergenic	Intergenic	-38708	ENSRNOT00000010409	ENSRNOG00000006331	ENSRNOT00000010409			Elovl5			protein_coding
NA_peak_3095	6	28515071	28515071	+	938540	NA	promoter-TSS (ENSRNOT00000005317)	protein_coding-promoter-TSS (ENSRNOT00000005317)	-5	ENSRNOT00000005317	ENSRNOG00000003988	ENSRNOT00000081141			Dnajc27			protein_coding
NA_peak_597	10	71278773	71278773	+	938540	NA	intron (ENSRNOT00000092020, intron 1 of 9)	protein_coding-intron (ENSRNOT00000092020, intron 1 of 9)	123	ENSRNOT00000092020	ENSRNOG00000053814	ENSRNOT00000092020			AC105531.1			protein_coding
NA_peak_1270	15	20031927	20031927	+	938540	NA	TTS (ENSRNOT00000074838)	miRNA-TTS (ENSRNOT00000074838)	237	ENSRNOT00000074838	ENSRNOG00000049130	ENSRNOT00000074838			AABR07017259.1			miRNA
NA_peak_1735	19	10518815	10518815	+	938540	NA	promoter-TSS (ENSRNOT00000030229)	protein_coding-promoter-TSS (ENSRNOT00000030229)	-678	ENSRNOT00000030229	ENSRNOG00000025843	ENSRNOT00000030229			Ccdc102a			protein_coding
NA_peak_121	1	94153539	94153539	+	938540	NA	Intergenic	Intergenic	-1471	ENSRNOT00000089772	ENSRNOG00000055070	ENSRNOT00000089772			AABR07003030.2			lincRNA
NA_peak_778	11	60613633	60613633	+	938540	NA	promoter-TSS (ENSRNOT00000002853)	protein_coding-promoter-TSS (ENSRNOT00000002853)	85	ENSRNOT00000002906	ENSRNOG00000002094	ENSRNOT00000093292			Atg3			protein_coding
NA_peak_557	10	57322446	57322446	+	938540	NA	intron (ENSRNOT00000041493, intron 1 of 26)	protein_coding-intron (ENSRNOT00000041493, intron 1 of 26)	115	ENSRNOT00000041493	ENSRNOG00000031364	ENSRNOT00000041493			Kif1c			protein_coding
NA_peak_2642	4	96659197	96659197	+	938540	NA	exon (ENSRNOT00000009569, exon 1 of 14)	protein_coding-exon (ENSRNOT00000009569, exon 1 of 14)	113	ENSRNOT00000009569	ENSRNOG00000023679	ENSRNOT00000009569			Prdm5			protein_coding
NA_peak_3142	6	91532445	91532445	+	938540	NA	promoter-TSS (ENSRNOT00000064668)	protein_coding-promoter-TSS (ENSRNOT00000064668)	-22	ENSRNOT00000082500	ENSRNOG00000004425	ENSRNOT00000082500			Klhdc1			protein_coding
NA_peak_3178	6	107080343	107080343	+	938540	NA	intron (ENSRNOT00000011662, intron 1 of 11)	protein_coding-intron (ENSRNOT00000011662, intron 1 of 11)	181	ENSRNOT00000011662	ENSRNOG00000008614	ENSRNOT00000011662			Zfyve1			protein_coding
NA_peak_2763	5	19559293	19559293	+	938540	NA	promoter-TSS (ENSRNOT00000014289)	protein_coding-promoter-TSS (ENSRNOT00000014289)	-49	ENSRNOT00000014289	ENSRNOG00000010234	ENSRNOT00000089666			Nsmaf			protein_coding
NA_peak_1643	18	27159363	27159363	+	938540	NA	intron (ENSRNOT00000027345, intron 1 of 4)	protein_coding-intron (ENSRNOT00000027345, intron 1 of 4)	330	ENSRNOT00000027345	ENSRNOG00000020167	ENSRNOT00000027345			Reep5			protein_coding
NA_peak_1554	17	35037052	35037052	+	938540	NA	promoter-TSS (ENSRNOT00000090946)	protein_coding-promoter-TSS (ENSRNOT00000090946)	24	ENSRNOT00000090946	ENSRNOG00000056376	ENSRNOT00000090946			Dusp22			protein_coding
NA_peak_2055	2	207541490	207541490	+	938540	NA	intron (ENSRNOT00000019680, intron 1 of 5)	protein_coding-intron (ENSRNOT00000019680, intron 1 of 5)	155	ENSRNOT00000019680	ENSRNOG00000014479	ENSRNOT00000019680			Cttnbp2nl			protein_coding
NA_peak_260	1	200696980	200696980	+	938540	NA	promoter-TSS (ENSRNOT00000022253)	protein_coding-promoter-TSS (ENSRNOT00000022253)	-52	ENSRNOT00000022253	ENSRNOG00000016374	ENSRNOT00000065448			Fgfr2			protein_coding
NA_peak_269	1	205136793	205136793	+	938540	NA	Intergenic	Intergenic	-96038	ENSRNOT00000023574	ENSRNOG00000017326	ENSRNOT00000023404			Ctbp2			protein_coding
NA_peak_905	12	25093434	25093434	+	938540	NA	promoter-TSS (ENSRNOT00000081084)	protein_coding-promoter-TSS (ENSRNOT00000081084)	-90	ENSRNOT00000081084	ENSRNOG00000001454	ENSRNOT00000050059			Eif4h			protein_coding
NA_peak_394	1	263884165	263884165	+	938540	NA	exon (ENSRNOT00000030782, exon 1 of 21)	protein_coding-exon (ENSRNOT00000030782, exon 1 of 21)	1004	ENSRNOT00000030782	ENSRNOG00000022485	ENSRNOT00000030782			Chuk			protein_coding
NA_peak_1533	17	18028540	18028540	+	938540	NA	promoter-TSS (ENSRNOT00000022085)	protein_coding-promoter-TSS (ENSRNOT00000022085)	268	ENSRNOT00000022244	ENSRNOG00000016519	ENSRNOT00000022244			Kdm1b			protein_coding
NA_peak_2780	5	39321274	39321274	+	938540	NA	exon (ENSRNOT00000034194, exon 2 of 4)	pseudogene-exon (ENSRNOT00000034194, exon 2 of 4)	185	ENSRNOT00000034194	ENSRNOG00000024161	ENSRNOT00000034194			AABR07047598.1			pseudogene
NA_peak_2615	4	68483787	68483787	+	938540	NA	intron (ENSRNOT00000015744, intron 1 of 15)	protein_coding-intron (ENSRNOT00000015744, intron 1 of 15)	467	ENSRNOT00000015744	ENSRNOG00000011509	ENSRNOT00000015744			Agk			protein_coding
NA_peak_691	10	105393174	105393174	+	938540	NA	exon (ENSRNOT00000013359, exon 1 of 3)	protein_coding-exon (ENSRNOT00000013359, exon 1 of 3)	102	ENSRNOT00000013359	ENSRNOG00000010029	ENSRNOT00000013359			Ubald2			protein_coding
NA_peak_853	12	2054816	2054816	+	938540	NA	exon (ENSRNOT00000001290, exon 1 of 14)	protein_coding-exon (ENSRNOT00000001290, exon 1 of 14)	136	ENSRNOT00000001290	ENSRNOG00000000975	ENSRNOT00000001290			Mcoln1			protein_coding
NA_peak_2340	3	61756317	61756317	+	938540	NA	exon (ENSRNOT00000002134, exon 1 of 10)	protein_coding-exon (ENSRNOT00000002134, exon 1 of 10)	169	ENSRNOT00000002134	ENSRNOG00000001559	ENSRNOT00000002134			Mtx2			protein_coding
NA_peak_463	10	14598181	14598181	+	938540	NA	promoter-TSS (ENSRNOT00000029674)	protein_coding-promoter-TSS (ENSRNOT00000029674)	167	ENSRNOT00000068336	ENSRNOG00000017858	ENSRNOT00000068336			Tsr3			protein_coding
NA_peak_3463	7	129723504	129723504	+	938540	NA	intron (ENSRNOT00000006034, intron 1 of 12)	protein_coding-intron (ENSRNOT00000006034, intron 1 of 12)	799	ENSRNOT00000006034	ENSRNOG00000004538	ENSRNOT00000006034			Brd1			protein_coding
NA_peak_3493	7	140438131	140438131	+	938540	NA	promoter-TSS (ENSRNOT00000087181)	protein_coding-promoter-TSS (ENSRNOT00000087181)	-664	ENSRNOT00000087181	ENSRNOG00000054775	ENSRNOT00000087176			Fkbp11			protein_coding
NA_peak_1888	2	30845673	30845673	+	938540	NA	exon (ENSRNOT00000025506, exon 1 of 16)	protein_coding-exon (ENSRNOT00000025506, exon 1 of 16)	476	ENSRNOT00000025506	ENSRNOG00000018746	ENSRNOT00000025506			Slc30a5			protein_coding
NA_peak_3737	9	1983969	1983969	+	938540	NA	exon (ENSRNOT00000018146, exon 2 of 7)	protein_coding-exon (ENSRNOT00000018146, exon 2 of 7)	685	ENSRNOT00000018146	ENSRNOG00000013368	ENSRNOT00000018146			Plcl2			protein_coding
NA_peak_1953	2	116029203	116029203	+	938540	NA	intron (ENSRNOT00000089477, intron 1 of 16)	protein_coding-intron (ENSRNOT00000089477, intron 1 of 16)	422	ENSRNOT00000089477	ENSRNOG00000009491	ENSRNOT00000066495			Phc3			protein_coding
NA_peak_2729	4	161756973	161756973	+	938540	NA	intron (ENSRNOT00000008737, intron 1 of 9)	protein_coding-intron (ENSRNOT00000008737, intron 1 of 9)	474	ENSRNOT00000008737	ENSRNOG00000006444	ENSRNOT00000008737			Fkbp4			protein_coding
NA_peak_349	1	241875933	241875933	+	938540	NA	promoter-TSS (ENSRNOT00000091282)	protein_coding-promoter-TSS (ENSRNOT00000091282)	-69	ENSRNOT00000091282	ENSRNOG00000061147	ENSRNOT00000091282			Fam189a2			protein_coding
NA_peak_485	10	31418808	31418808	+	938540	NA	intron (ENSRNOT00000059496, intron 1 of 29)	protein_coding-intron (ENSRNOT00000059496, intron 1 of 29)	427	ENSRNOT00000059496	ENSRNOG00000006557	ENSRNOT00000081280			Cyfip2			protein_coding
NA_peak_406	1	266844767	266844767	+	938540	NA	exon (ENSRNOT00000027482, exon 1 of 11)	protein_coding-exon (ENSRNOT00000027482, exon 1 of 11)	287	ENSRNOT00000027482	ENSRNOG00000020274	ENSRNOT00000027482			Taf5			protein_coding
NA_peak_1959	2	121165562	121165562	+	938540	NA	exon (ENSRNOT00000016236, exon 1 of 2)	protein_coding-exon (ENSRNOT00000016236, exon 1 of 2)	425	ENSRNOT00000016236	ENSRNOG00000012199	ENSRNOT00000016236			Sox2			protein_coding
NA_peak_1004	13	52111052	52111052	+	938540	NA	exon (ENSRNOT00000009198, exon 1 of 11)	protein_coding-exon (ENSRNOT00000009198, exon 1 of 11)	311	ENSRNOT00000009198	ENSRNOG00000006720	ENSRNOT00000009198			Rnpep			protein_coding
NA_peak_2848	5	100983110	100983110	+	938540	NA	Intergenic	Intergenic	-5208	ENSRNOT00000077429	ENSRNOG00000010484	ENSRNOT00000077429			Zdhhc21			protein_coding
NA_peak_1146	14	42716799	42716799	+	938540	NA	exon (ENSRNOT00000091449, exon 4 of 4)	protein_coding-exon (ENSRNOT00000091449, exon 4 of 4)	-1065	ENSRNOT00000081849	ENSRNOG00000052897	ENSRNOT00000081849			AABR07014983.2			pseudogene
NA_peak_1730	19	9668536	9668536	+	938540	NA	intron (ENSRNOT00000016563, intron 1 of 48)	protein_coding-intron (ENSRNOT00000016563, intron 1 of 48)	350	ENSRNOT00000016563	ENSRNOG00000012271	ENSRNOT00000016563			Cnot1			protein_coding
NA_peak_2335	3	60407656	60407656	+	938540	NA	Intergenic	Intergenic	43507	ENSRNOT00000070351	ENSRNOG00000045084	ENSRNOT00000070351			5S_rRNA			rRNA
NA_peak_2709	4	151448557	151448557	+	938540	NA	Intergenic	Intergenic	8475	ENSRNOT00000089708	ENSRNOG00000057063	ENSRNOT00000089708			U6			snRNA
NA_peak_2875	5	128215958	128215958	+	936393	NA	intron (ENSRNOT00000011670, intron 1 of 24)	protein_coding-intron (ENSRNOT00000011670, intron 1 of 24)	247	ENSRNOT00000011670	ENSRNOG00000008634	ENSRNOT00000011670			Cc2d1b			protein_coding
NA_peak_2919	5	142689214	142689214	+	936393	NA	intron (ENSRNOT00000010007, intron 1 of 5)	protein_coding-intron (ENSRNOT00000010007, intron 1 of 5)	188	ENSRNOT00000010007	ENSRNOG00000007541	ENSRNOT00000010007			Fhl3			protein_coding
NA_peak_3020	5	166695063	166695063	+	936393	NA	promoter-TSS (ENSRNOT00000047763)	protein_coding-promoter-TSS (ENSRNOT00000047763)	71	ENSRNOT00000047763	ENSRNOG00000023152	ENSRNOT00000047763			Tmem201			protein_coding
NA_peak_2485	3	161376740	161376740	+	936393	NA	promoter-TSS (ENSRNOT00000023521)	protein_coding-promoter-TSS (ENSRNOT00000023521)	-621	ENSRNOT00000023521	ENSRNOG00000017290	ENSRNOT00000023521			Zfp335			protein_coding
NA_peak_2496	3	164239329	164239329	+	936393	NA	promoter-TSS (ENSRNOT00000012604)	protein_coding-promoter-TSS (ENSRNOT00000012604)	-79	ENSRNOT00000012604	ENSRNOG00000009207	ENSRNOT00000012604			Spata2			protein_coding
NA_peak_304	1	220992638	220992638	+	935155	NA	promoter-TSS (ENSRNOT00000045233)	protein_coding-promoter-TSS (ENSRNOT00000045233)	-132	ENSRNOT00000045233	ENSRNOG00000030888	ENSRNOT00000045233			Rela			protein_coding
NA_peak_2707	4	150184969	150184969	+	935155	NA	promoter-TSS (ENSRNOT00000019778)	protein_coding-promoter-TSS (ENSRNOT00000019778)	75	ENSRNOT00000019778	ENSRNOG00000014713	ENSRNOT00000019778			Csgalnact2			protein_coding
NA_peak_1787	19	38153319	38153319	+	935155	NA	Intergenic	Intergenic	-5390	ENSRNOT00000071606	ENSRNOG00000047810	ENSRNOT00000071606			AC128800.1			miRNA
NA_peak_2123	20	3823231	3823231	+	935155	NA	promoter-TSS (ENSRNOT00000000541)	protein_coding-promoter-TSS (ENSRNOT00000000541)	189	ENSRNOT00000041613	ENSRNOG00000000464	ENSRNOT00000081588			Rxrb			protein_coding
NA_peak_3892	9	115555818	115555818	+	935155	NA	promoter-TSS (ENSRNOT00000056366)	protein_coding-promoter-TSS (ENSRNOT00000056366)	-557	ENSRNOT00000056366	ENSRNOG00000011700	ENSRNOT00000091316			Ptprm			protein_coding
NA_peak_1605	17	85454533	85454533	+	935155	NA	Intergenic	Intergenic	-45580	ENSRNOT00000091937	ENSRNOG00000060274	ENSRNOT00000091937			AABR07028768.1			protein_coding
NA_peak_3132	6	75762999	75762999	+	935155	NA	intron (ENSRNOT00000072589, intron 1 of 3)	protein_coding-intron (ENSRNOT00000072589, intron 1 of 3)	186	ENSRNOT00000072589	ENSRNOG00000045892	ENSRNOT00000072589			Cfl2			protein_coding
NA_peak_846	11	88048123	88048123	+	935155	NA	intron (ENSRNOT00000046159, intron 1 of 3)	protein_coding-intron (ENSRNOT00000046159, intron 1 of 3)	291	ENSRNOT00000046159	ENSRNOG00000001862	ENSRNOT00000046159			Ube2l3			protein_coding
NA_peak_1761	19	25095148	25095148	+	935155	NA	promoter-TSS (ENSRNOT00000041717)	protein_coding-promoter-TSS (ENSRNOT00000041717)	59	ENSRNOT00000041717	ENSRNOG00000005257	ENSRNOT00000041717			Prkaca			protein_coding
NA_peak_373	1	255556292	255556292	+	935155	NA	exon (ENSRNOT00000033780, exon 2 of 2)	protein_coding-exon (ENSRNOT00000033780, exon 2 of 2)	763	ENSRNOT00000033780	ENSRNOG00000022796	ENSRNOT00000033780			Fgfbp3			protein_coding
NA_peak_1353	15	89407789	89407789	+	935155	NA	exon (ENSRNOT00000039423, exon 1 of 8)	protein_coding-exon (ENSRNOT00000039423, exon 1 of 8)	363	ENSRNOT00000039423	ENSRNOG00000024022	ENSRNOT00000039423			Ndfip2			protein_coding
NA_peak_211	1	170586269	170586269	+	935155	NA	exon (ENSRNOT00000025955, exon 1 of 5)	protein_coding-exon (ENSRNOT00000025955, exon 1 of 5)	334	ENSRNOT00000025955	ENSRNOG00000019178	ENSRNOT00000025955			Taf10			protein_coding
NA_peak_1251	15	2983461	2983461	+	935155	NA	Intergenic	Intergenic	-16885	ENSRNOT00000017383	ENSRNOG00000012850	ENSRNOT00000070893			Kat6b			protein_coding
NA_peak_2974	5	153625466	153625466	+	918539	NA	intron (ENSRNOT00000024464, intron 1 of 5)	protein_coding-intron (ENSRNOT00000024464, intron 1 of 5)	403	ENSRNOT00000024464	ENSRNOG00000018109	ENSRNOT00000024464			Clic4			protein_coding
NA_peak_3414	7	117519553	117519553	+	918539	NA	exon (ENSRNOT00000029768, exon 1 of 2)	protein_coding-exon (ENSRNOT00000029768, exon 1 of 2)	478	ENSRNOT00000029768	ENSRNOG00000021812	ENSRNOT00000029768			Scx			protein_coding
[truncated: 2,077 more rows]
