# Supplementary material for: A genetic compensatory mechanism regulated by Jun and Mef2d modulates the expression of distinct class IIa Hdacs to ensure peripheral nerve myelination and repair
Source: eLife journal article supplement (doi:10.7554/elife.72917), 2022-01-25
Supplement: supp [file elife-72917-supp-v1.zip]

A

|       |                                                              |     |       |                                                                |      |
|-------|--------------------------------------------------------------|-----|-------|----------------------------------------------------------------|------|
| human | CGGCCGGGTAGGATGACAATGGAAGGAAATGCTTATCTGAGTCTGAGAGCGGGCCAAGG  | 60  | human | CAGATTTTGAAAGTTTCTTTTTTAAAGAAATTTCTCAAGGGACTTCCTTCCTCCTCT      | 741  |
| mouse | CGGCCGGGTAGGATGACAATGGAAGGAAATGCTTATCTGAGTCTGAGAGCGGGCCAAGG  | 60  | mouse | GTGGTG-CAGTTTTCGAAACTTAAAAAAATTTTCTCAAGGGATTTCCTTCATCCTCT      | 750  |
| rat   | CGGCCGGGTAGGATGACAATGGAAGGAAATGCTTATCTGAGTCTGAGAGCGGGCCAAGG  | 60  | rat   | ATGCAG-TTTTGAACCTTTTAAAAAAGAAATTTCTCAAGGGATTTCCTTCACCTCT       | 727  |
| ***** |                                                              |     |       |                                                                |      |
| human | GGGAGGGAGGGAGGGGCGAGCGCTCGCGGCCCTGGGACACACACCCCGGACAGACT     | 120 | human | CCTCTTCCTCTCTTCTCCTCCATTCCTCTCCCTCCACAACCCCTCTTTCCCTCCCGG      | 801  |
| mouse | GGGAGGGAGGGAGGGGCGAGCGCTCGCGGCCCTGGGACACACACCCCGGCTTCGCTC    | 120 | mouse | CCTCTTCCTCTTCCATTCCTCTCCTCCCAATGACCTCTTGGCCCCCCTCCTGG          | 810  |
| rat   | GGGAGGGAGGGAGGGGCGAGCGCTCGCGGCCCTGGGACACACACCCCGGCTTTGCTC    | 120 | rat   | CCTCTTCCTCTTCCATTCCTCTCCTCCCAATGACCTCTTGGCCCCCCTCCTGG          | 785  |
| ***** |                                                              |     |       |                                                                |      |
| human | GCACCGCGCGGCGACAGCGCGGCGCGACACCGCGCGCGCCAGATCGCGCGGGGCG      | 180 | human | TCCCTATGAGTCAAACTTCAGCAATGTGCCAGTGTCCCCAGTGCATTACAGCGGATCA     | 861  |
| mouse | AGCAG-----CACACAGCTGGCGGAGACACCGA-----TCGCGCGCGGGGCG         | 163 | mouse | ACCCTATGAGTCAAACTTCAGCAATGTGCCAGTGTCCCCAGTGCATTACAGCGGATCA     | 870  |
| rat   | AGCGG-----CACACAGGTGGCGGACACCGA-----TCGCGCGGGGCG             | 163 | rat   | TCCCTATGAGTCAAACTTCAGCAATGTGCCAGTGTCCCCAGTGCATTACAGCGGATCA     | 845  |
| ***** |                                                              |     |       |                                                                |      |
| human | CGGCGCACTGCGGGGAGGCGAGCGCG-----AACCCGGAACGCGCG               | 222 | human | CAGAAATGTTCCAGTCTGTGAGTCGGAATGCAGCGCCTCCAGCCCTCCTCAGTAATA      | 921  |
| mouse | CGGCTCACGCGCGGGAGGCGAGCGCGAACCGGAACGCGGAGCGCGGACCGCGCG       | 223 | mouse | CAGAAATGTTCCAGTCTGTGAGTCGGAATGCAGCGCCTCCAGCCCTCCTCAGTAATA      | 930  |
| rat   | CGGCTCACGCGCGGGAGGCGAGCGCGAACCGGAACGCGGAGCGCGGACCGCGCG       | 223 | rat   | AGAAATGTTCTAGTTTGTGAGTCGGAATGCAGCGCCTCCAGCCCTCCTCAGTAATA       | 905  |
| ***** |                                                              |     |       |                                                                |      |
| human | CGCGGCTCCGAGCCCCAGCGCGCGAGGCGCTCCGAGCGGTGCACAAATTCGCGGAAC    | 282 | human | AACTCAGCTCAGGCGCGCTTTAGGAGTGGCCCTCCCTGCCTCCTCCGCTT---TT        | 978  |
| mouse | GCGGCGCGGAAGCCCCAGCGCGCGCGGCGCTGCGCGCGCGCACAAATTCGCGGAAC     | 283 | mouse | AACTCAGCTCAGGAGTGGCTTTGAGTGAAGCCCTCCCTGCCTCCTCCGCTT---ATCT     | 984  |
| rat   | GCGGCGCGGAAGCCCCAGCGCGCGCGGCGCTGCGCGCGCGCACAAATTCGCGGAAC     | 283 | rat   | AACTCAGCTCAGGAGTGGCTTTGAGTGAAGCCCTCCCTGCCTCCTCCGCTT---ATCT     | 965  |
| ***** |                                                              |     |       |                                                                |      |
| human | CCAGCTACCTGGGCGCAGCACCTCGCATACACACGCTACAGCAGCAGCATCCATGTT    | 342 | human | AGTGAGGAGAGGTGAGTTCAGGGGTGAGGGGTGAAGACCTCGCCATTGTGCTTCCT       | 1038 |
| mouse | CCAGATACTGAGTGCACGCAACCGGTGCATACACAGCGTACAGGGCGTGCATCCATGTT  | 343 | mouse | TAGACGGGAGGAGGTGAGTTCAGGGGTGAGGGGTGAGGGGTGAGGGGTGAGGGGTGAGGGGT | 1044 |
| rat   | CCAGATACTGAGTGCACGCAACCGGTGCATACACAGCGTACAGGGCGTGCATCCATGTT  | 343 | rat   | TAGATGGGAGGAGGTGAGTTCAGGGGTGAGGGGTGAGGGGTGAGGGGTGAGGGGTGAGGGGT | 1025 |
| ***** |                                                              |     |       |                                                                |      |
| human | TACAAGGGGAGAAATCATTACACAGCACACTGGGGCTTCGGGGTGGACCCCGTGCA     | 402 | human | GGGTAGCCGGTGCAGCGGTGTCTGCCTCCAGCAATCTGGAGTGTCTCT---AGGAAGGG    | 1095 |
| mouse | TACAAGCCAGGGTGTCTTACGCTTCGGGGAGGAGTCTCTGTGCACACATCTACACACT   | 403 | mouse | GGCTTGGCCTGTGAGTCTGTGTCTCCAGCAATTTGGCAGGTGAGAAACTGGGAAGGG      | 1104 |
| rat   | TACAAGCCAGGGTGTCTTACGCTTCGGGGAGGAGTCTCTGTGCACACATCTACACACT   | 403 | rat   | GGC-TGGCCTGTGAGCCCGTCCCTCCAGCAATCTGGCAGGTGAGAAACTGGGACGGG      | 1084 |
| ***** |                                                              |     |       |                                                                |      |
| human | CACACTACATACCCGTACAGCCCAAGCAGCAGCACACGCGGGCAGTGGGACAG        | 462 | human | GAGAGGTCCACACGAGGAACACTGGGCTCTCTGCAGCGTGGAGGCCACCATTTGAAA      | 1155 |
| mouse | TAAGTCAACGAGGGC-----AGCGCTACAC-ACAGGGAGAGCAGGCGACGCTTGGAGTCT | 457 | mouse | AGAGCGGTGATTCACAGGAACACTATGCTCCCTGCGCTTGGGTGCGCCGCACTGAAA      | 1164 |
| rat   | TAAAGTCAACGAGGGC-----AGCGCTACACACAGGAGAGCAGGCGACGCTTGGAGTCC  | 460 | rat   | AGCAAGGTGATTCACAGGAACACTGGGCTCTCTGCAGCGTGGAGGCCACCATTTGAAA     | 1144 |
| ***** |                                                              |     |       |                                                                |      |
| human | -----CGTGGTGTCCCATGTCCC-----ATACAAGGAATCCAGCAGGACA           | 503 | human | CCAAGGAGCAGCTTCCCTGACCCCATCTCTATCTCCGCAATCCTAAGAAACCCCAAGAA    | 1215 |
| mouse | CGAGCAAGGAATCCAGAGCGGACACCCCTGCCCCATCTTAACACACACACACACACA    | 517 | mouse | GGC-----AGCTTCTCTTCTGGTCCCAATCTACTCTGTAGTC-CTCGAACTCCAAGAA     | 1217 |
| rat   | CGAGCAAGGAATCCAGAGCGGACACCCCTGCCCCATCTTAACACACACACACACACA    | 505 | rat   | GGC-----AGCTTCTCTTCTGGTCCCAATCTACTCTGTAGTC-CTAGGAACTCCAAGAA    | 1197 |
| ***** |                                                              |     |       |                                                                |      |
| human | CCCCCACCACACACACACATAGCAGCACTTGCCCTCAGGAAGTTCCAGGATCTG       | 563 | human | TCCAGAGAAGGAAAAATGAGGAGCCCCAGAGGTGGAGTATGTCTGATTGGAAGCAAG      | 1275 |
| mouse | CACACACACACACACACACACACACAGCACTCTCTCAGGAACACTTCAGGATCTG      | 577 | mouse | CCTTTAGAGGGGAAAAATGAGGAGCACTAG-----AGATGTGATATCTTGAAGCCAG      | 1271 |
| rat   | -----TACACACTCAAGCGGACTCGCTCAGGAACGCTTCAGGGTCTG              | 550 | rat   | CCTTTAGAGGGGAAAAATGAGGAGCACTAG-----AGATGTGATATCTTGAAGCCAG      | 1251 |
| ***** |                                                              |     |       |                                                                |      |
| human | ATTTGAATCACTGCCAGCCCTCCCACTGGCACCCCA--CACACACACCATGCTGCG     | 621 | human | AGCCACAGTGGCTAGGAGGGCTTGG-CCATGTGCGGGTGAACCTCAAACCATAGATT      | 1334 |
| mouse | ATTTGAACCACTGCCAGTCCCAACCC-AGT-----GGCACCCCGCCCACTGTCTGC     | 631 | mouse | AGTCTTGAATGGCTAGGAGGGAGCTTGGCATGTGCTAGGTCACACACAGGTGTAGACT     | 1331 |
| rat   | ATTTGAACCACTGCCAGTCCCAACCCCGTGGCACCCCTTCCCTCTCCTCCCACTGTCTGC | 610 | rat   | AGTCAAGAGTAGCTAGAGAGATGTTGGCCATGCCACTGATGAACAGCTTGGCTCACAGG    | 1311 |
| ***** |                                                              |     |       |                                                                |      |
| human | TGAGGGAGCAGGAAGGTCCAGCTGTTCTTATTAAGAAAAAAGGGTGTGGGGTGGTG     | 681 | human | CTATTCCTTC                                                     | 1345 |
| mouse | TGAGGGAGCAGGAAGGTCCAGCTGTTCTTATTAAGAAAAAAGGGGATGGGGG         | 691 | mouse | -----                                                          | 1331 |
| rat   | TGAGGGAGCAGGAAGGTCCAGCTGTTCTTATTAAGAAAAAAGGGGTTGGGGT--G      | 668 | rat   | TTATGCTAAG                                                     | 1322 |
| ***** |                                                              |     |       |                                                                |      |

B

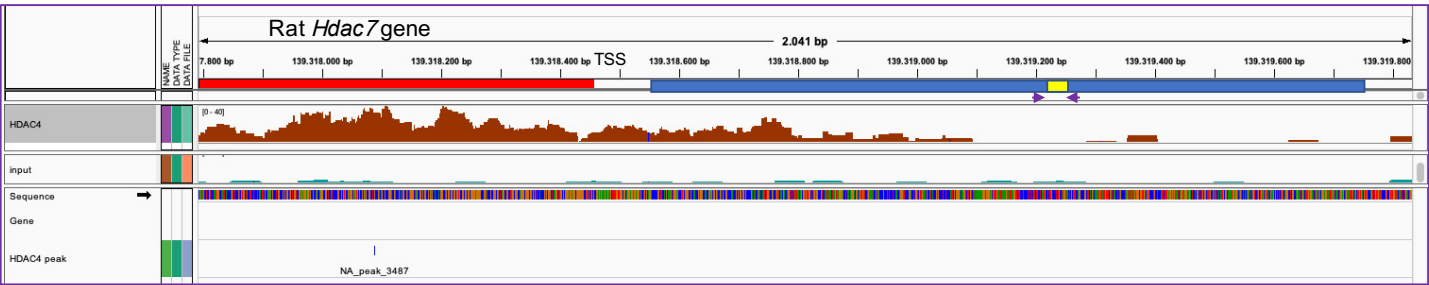

- JUN binding consensus sequence
- Region of the promoter cloned
- Primers used in ChIP-qPCR
