# Supplementary figures and images for: A genetic compensatory mechanism regulated by Jun and Mef2d modulates the expression of distinct class IIa Hdacs to ensure peripheral nerve myelination and repair
Source: eLife journal article supplement (doi:10.7554/elife.72917), 2022-01-25

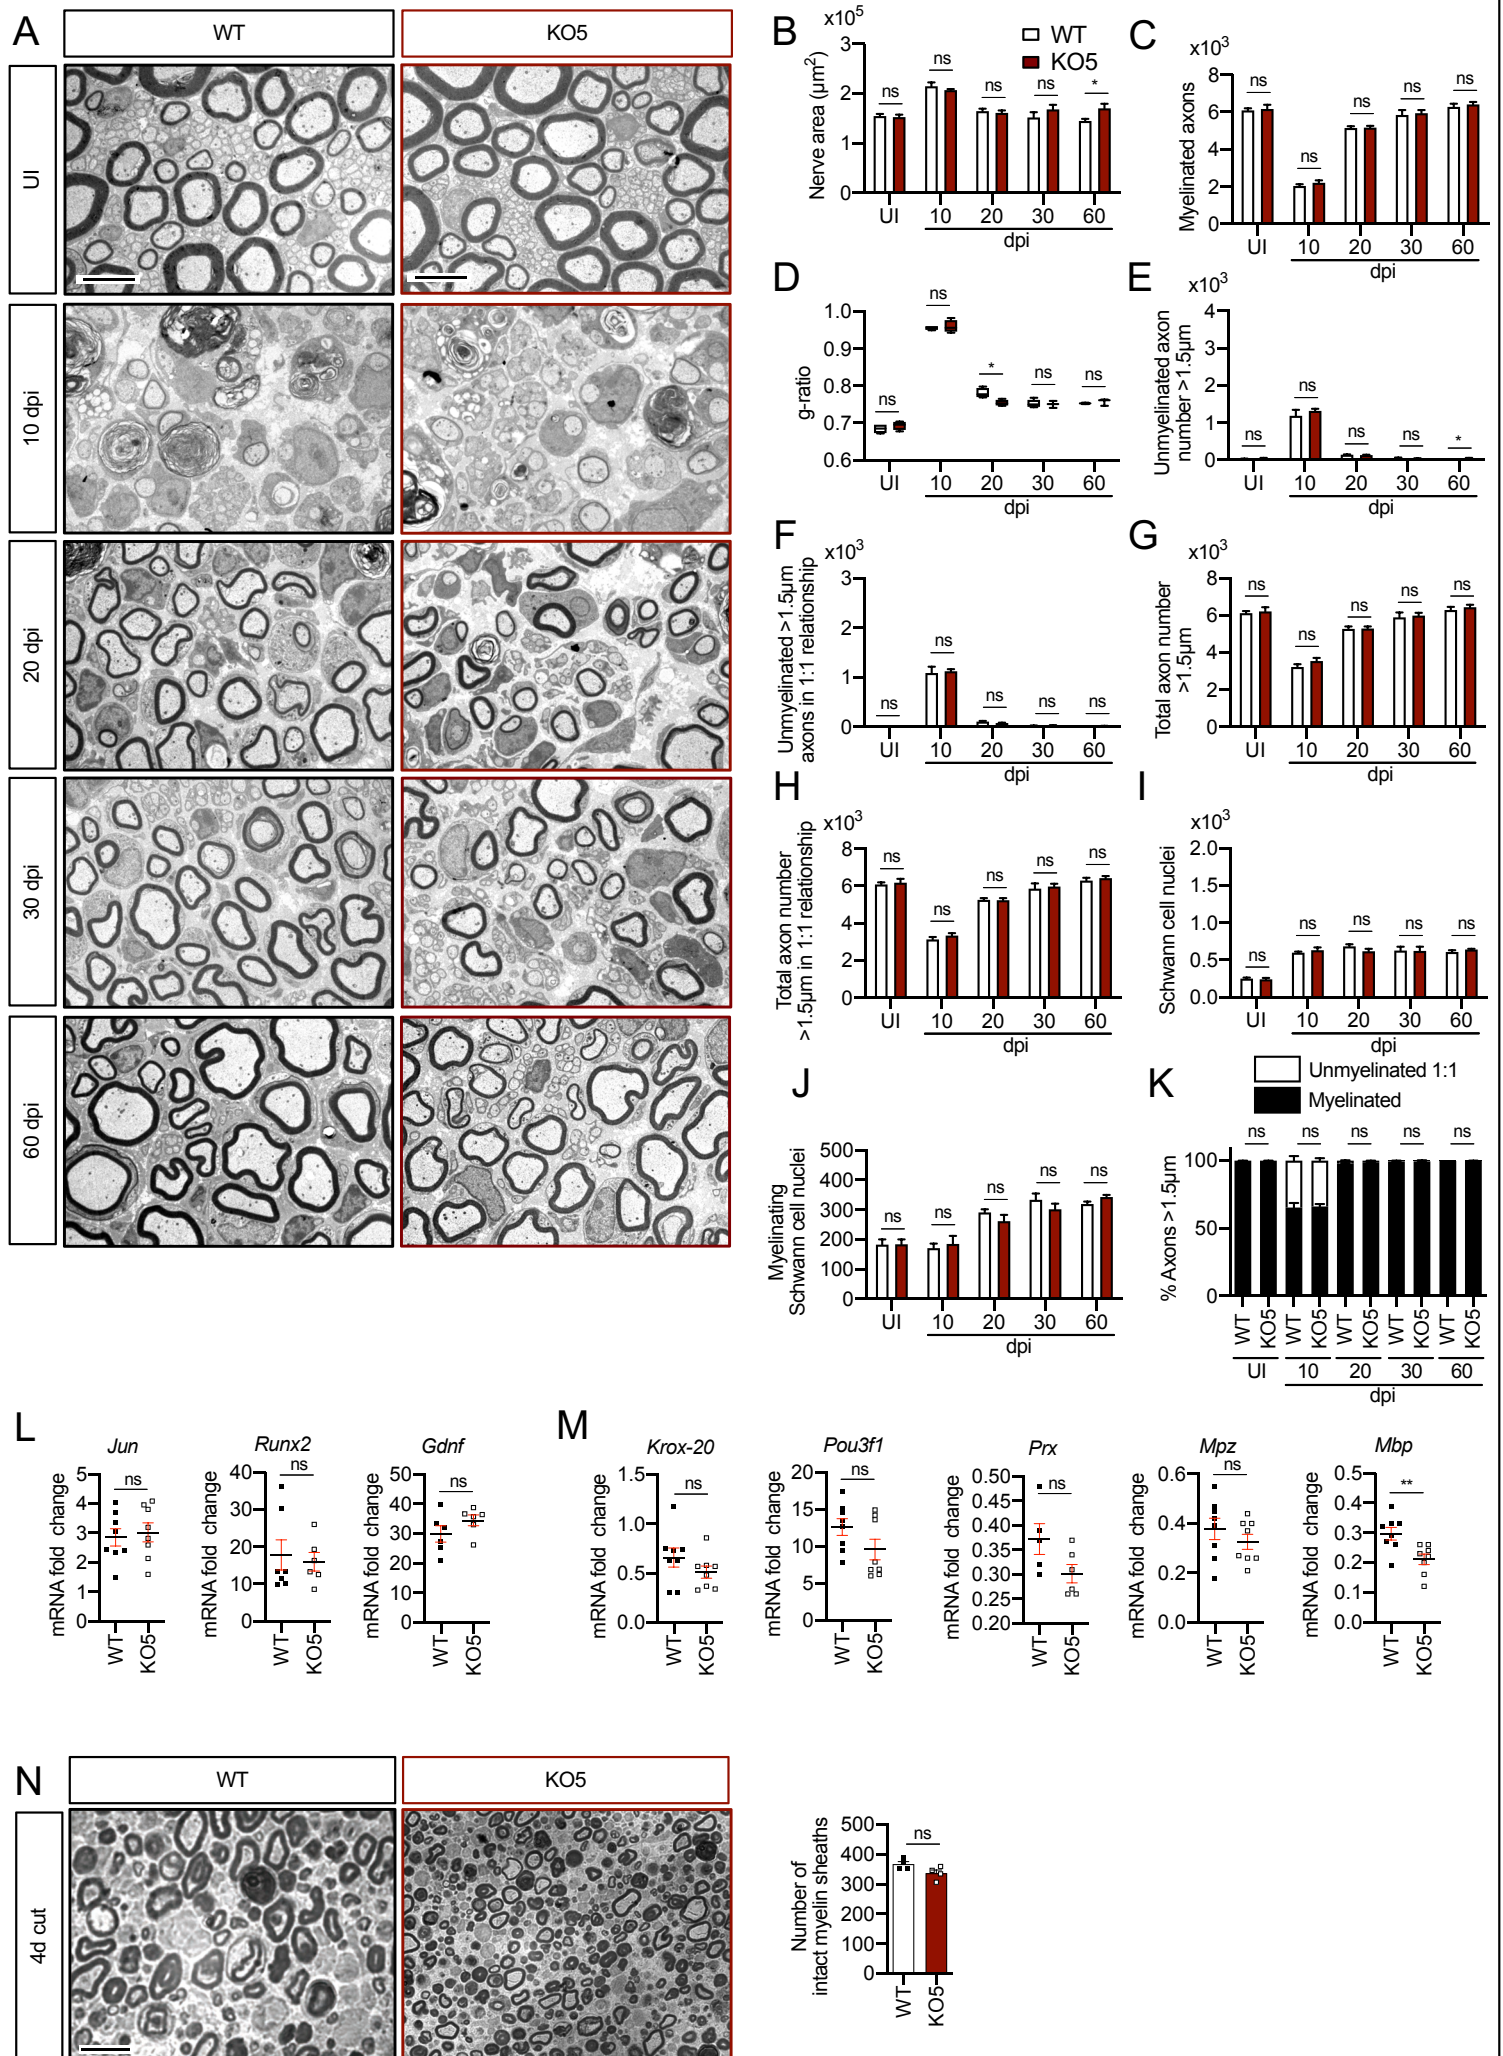

Supplement: supp [file elife-72917-supp-v1.zip]

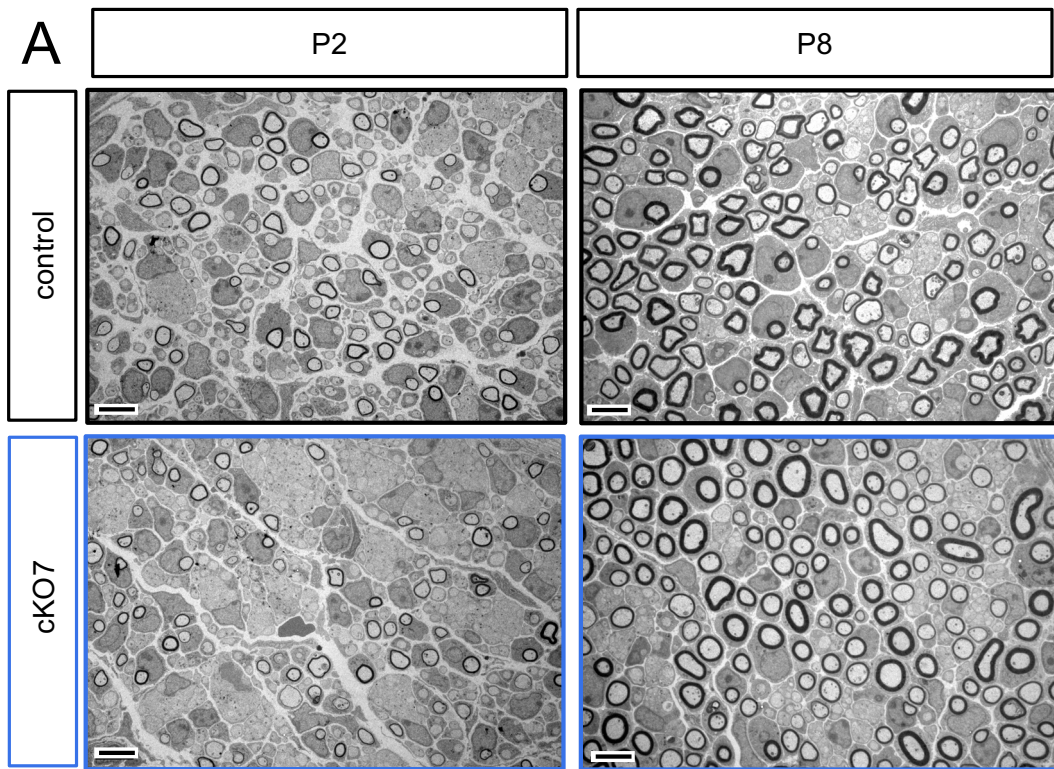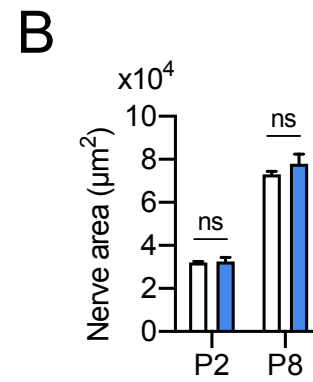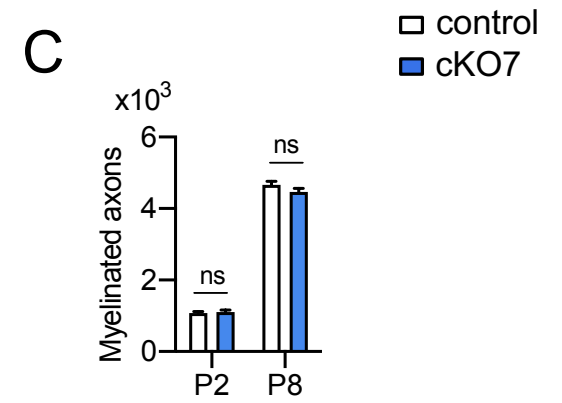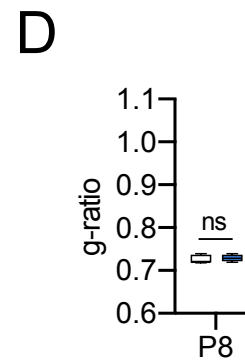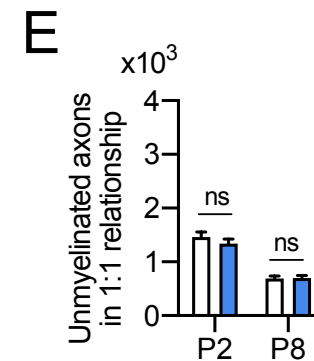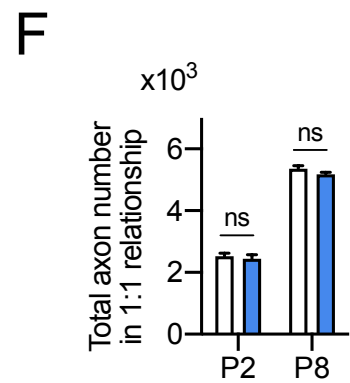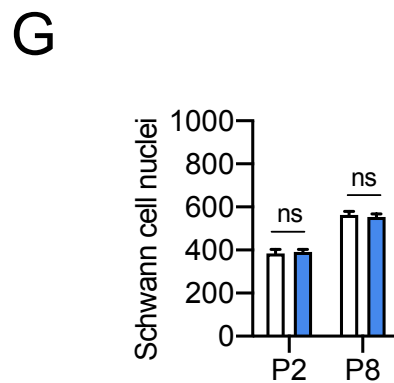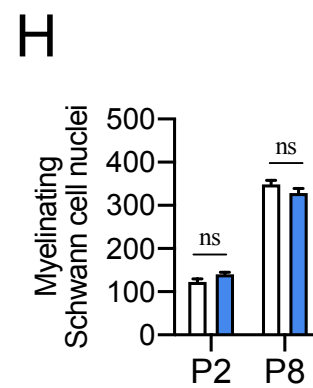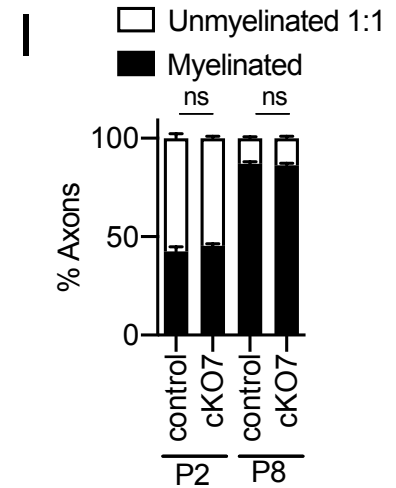

Supplement: supp [file elife-72917-supp-v1.zip]

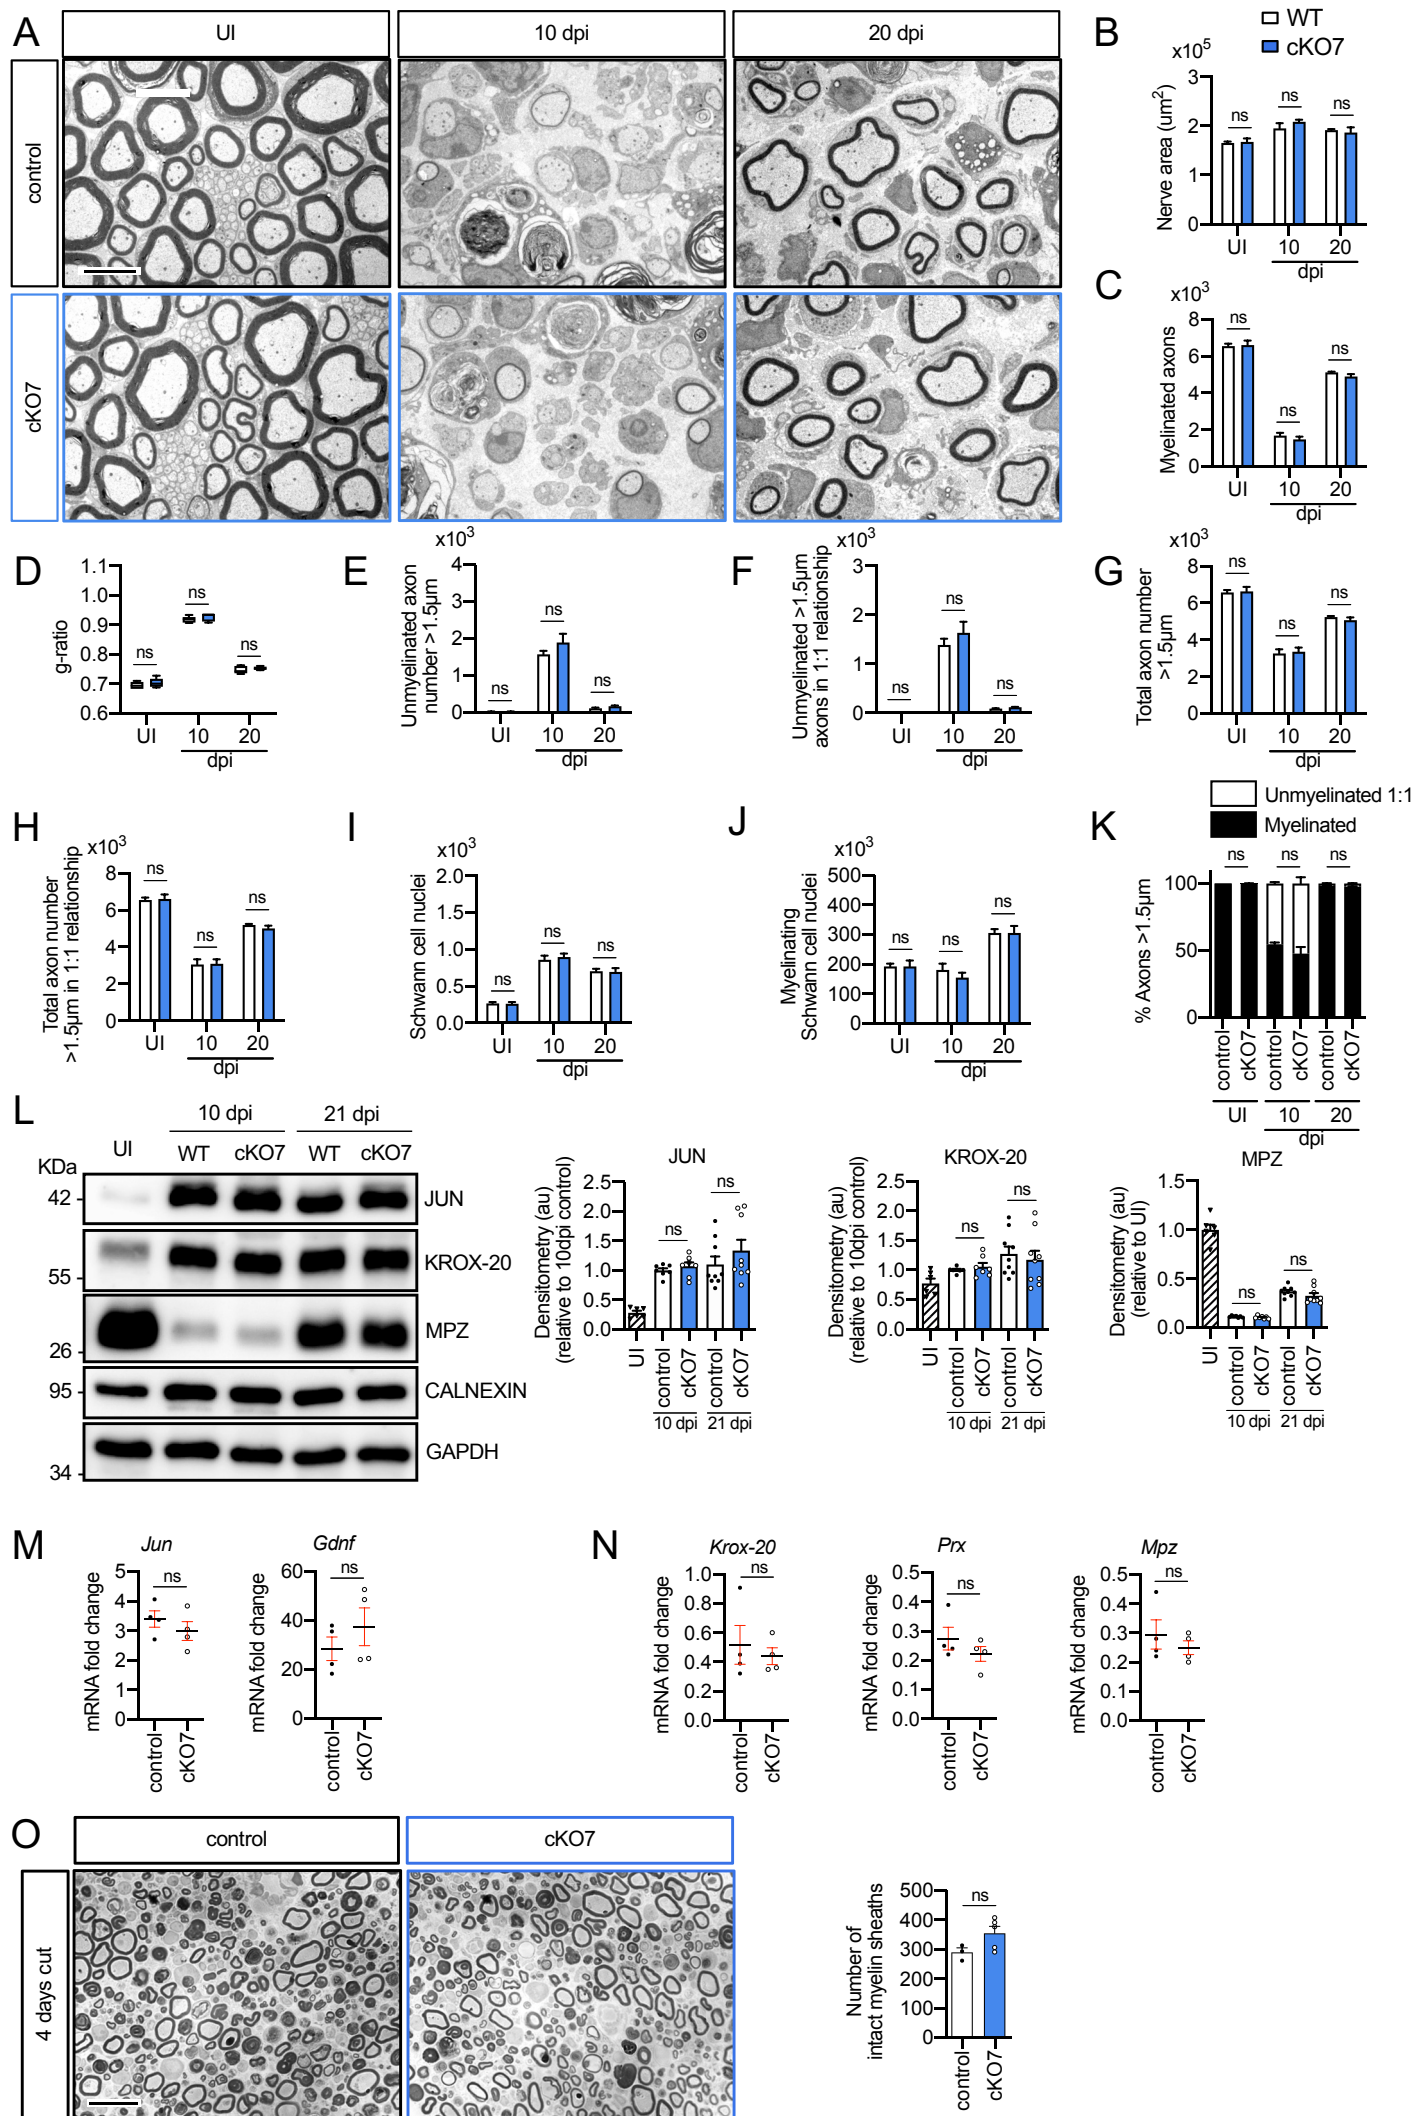

Supplement: supp [file elife-72917-supp-v1.zip]

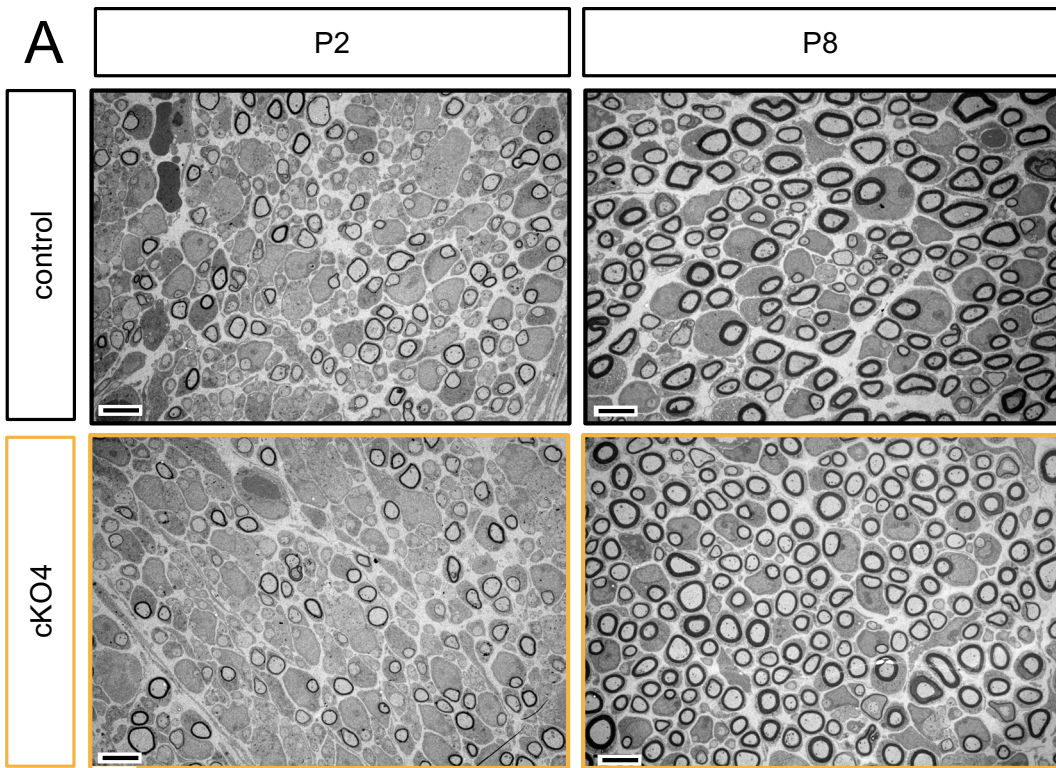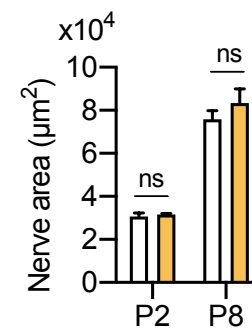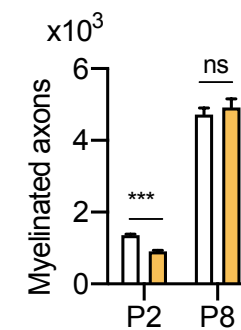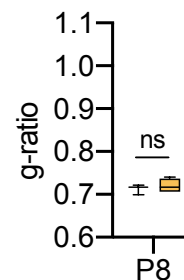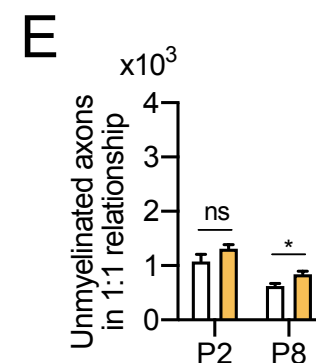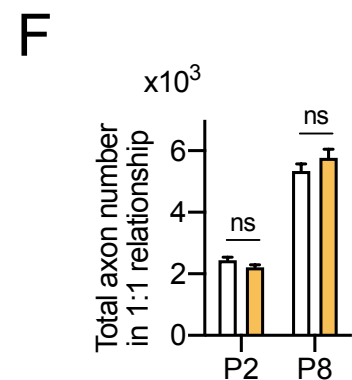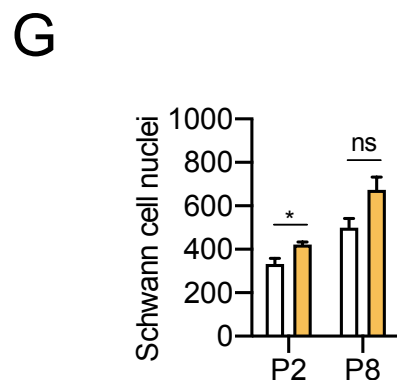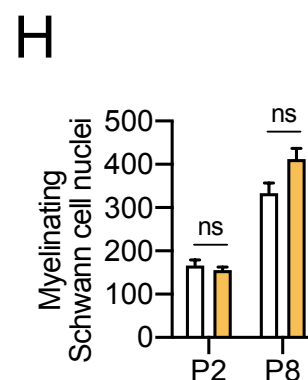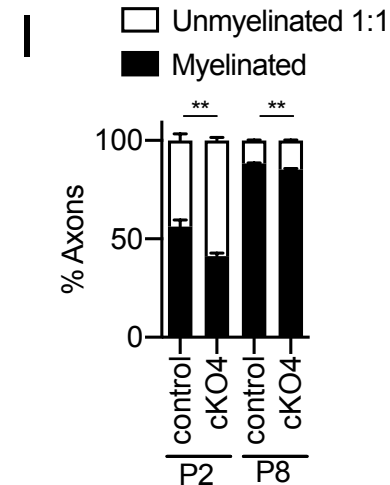

Supplement: supp [file elife-72917-supp-v1.zip]

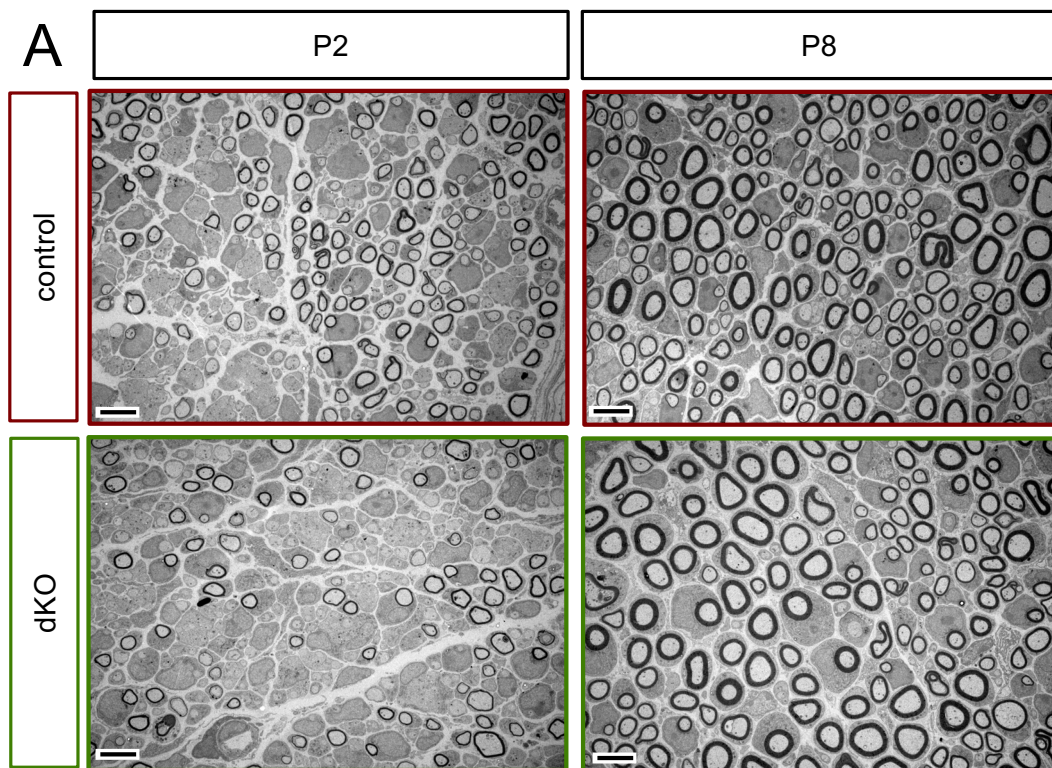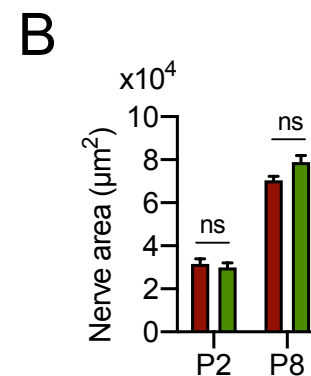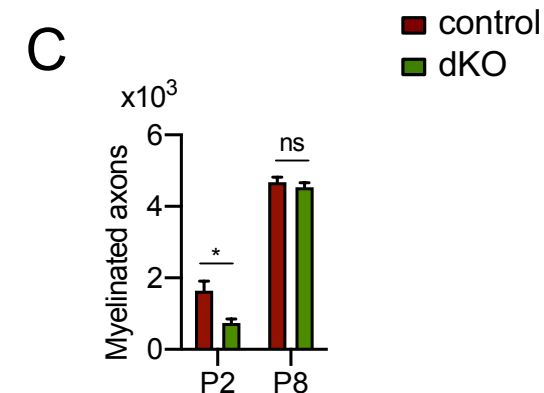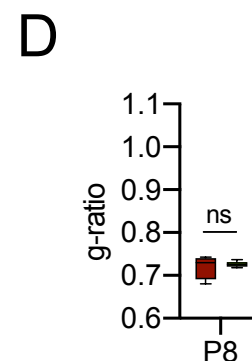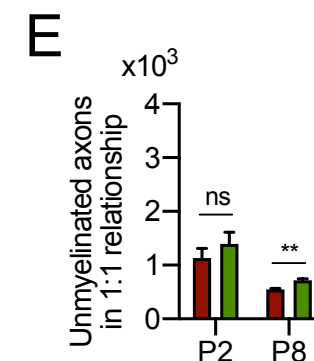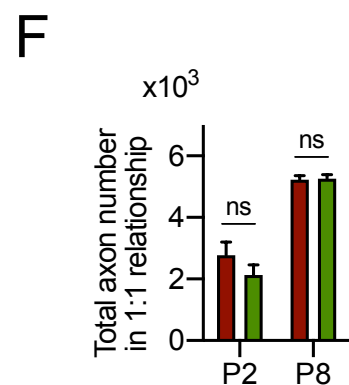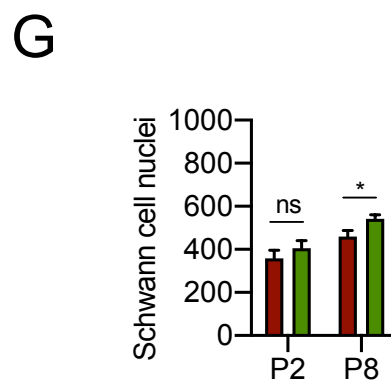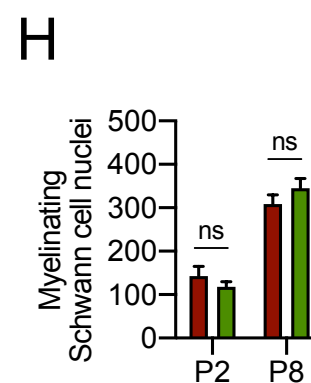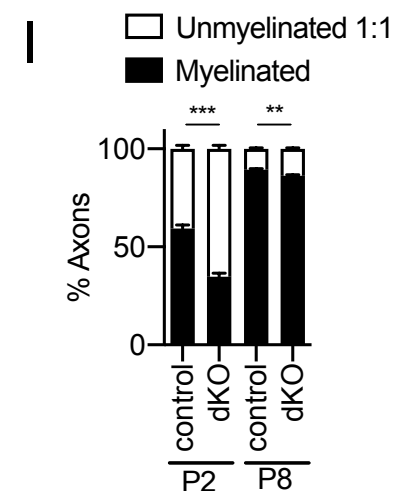

Supplement: supp [file elife-72917-supp-v1.zip]

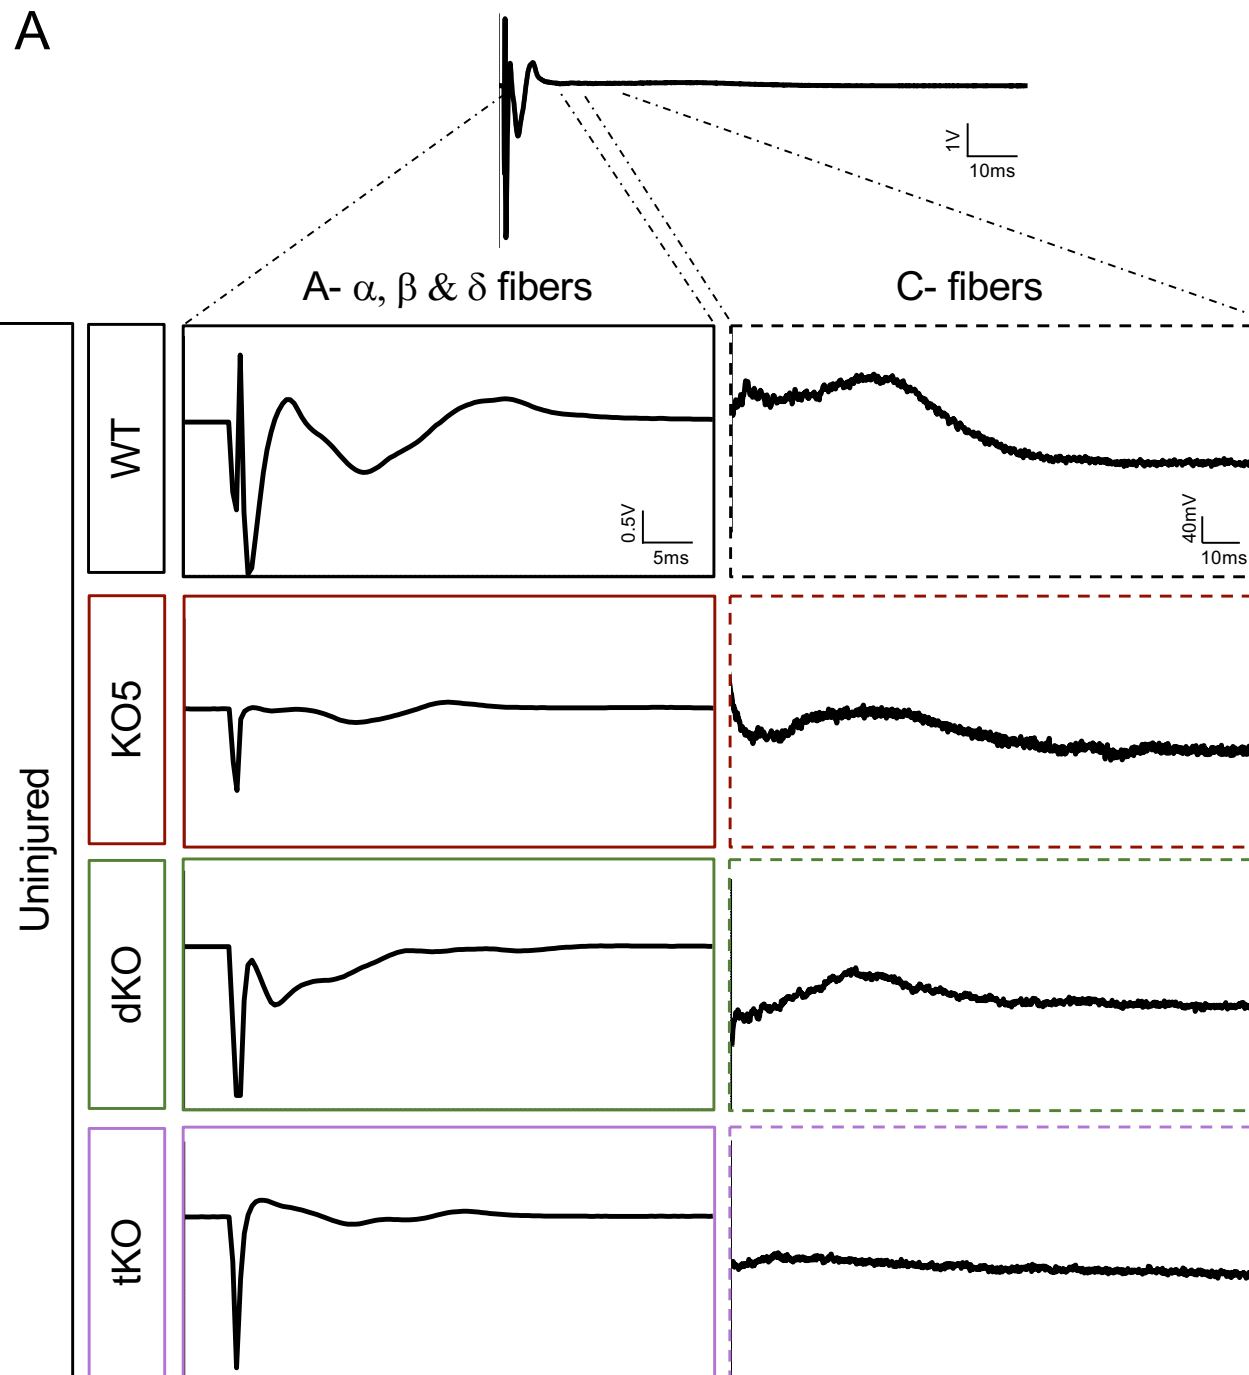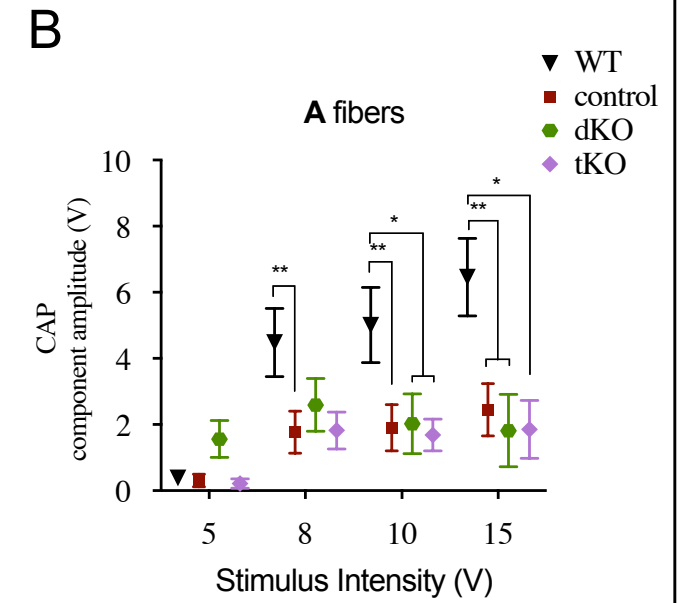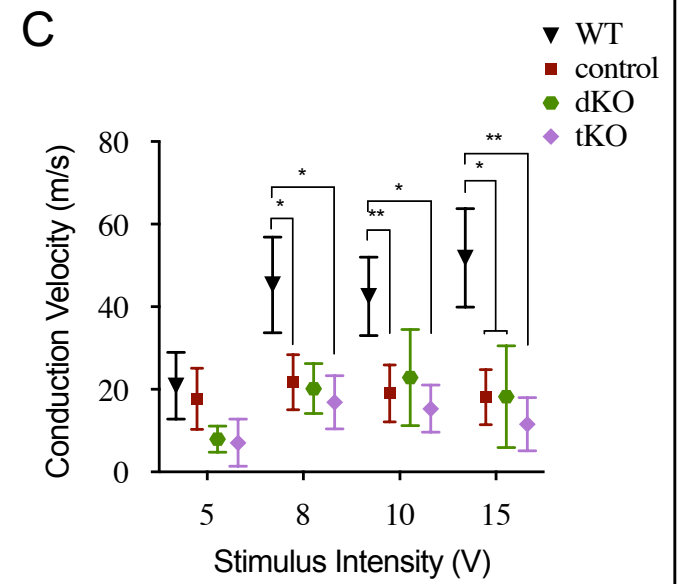

Supplement: supp [file elife-72917-supp-v1.zip]

A

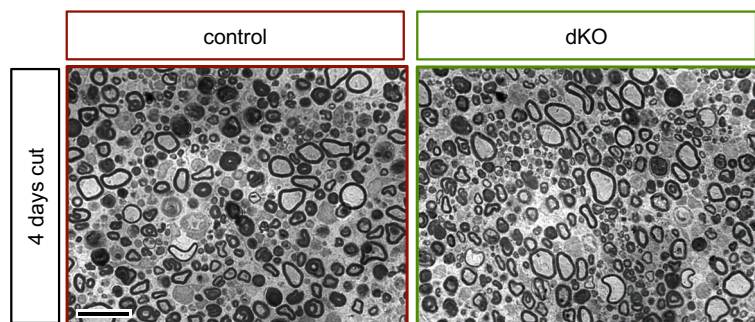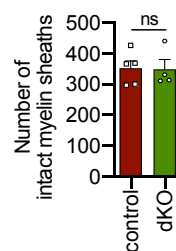

B

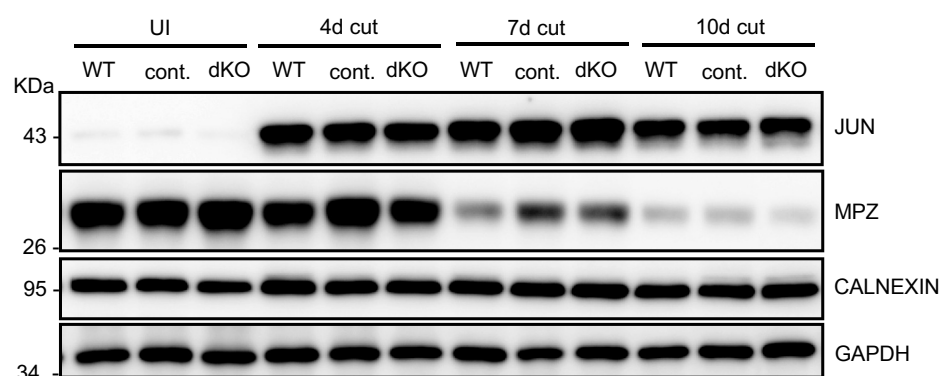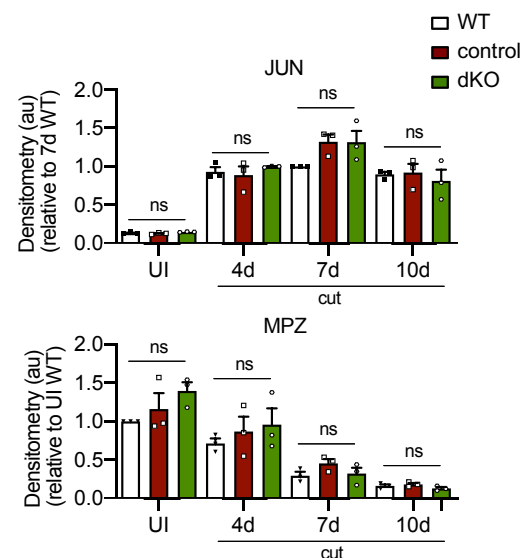

C

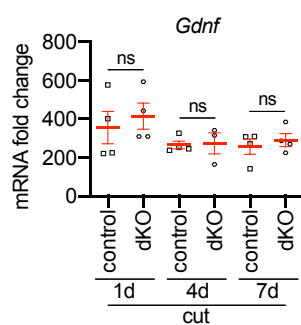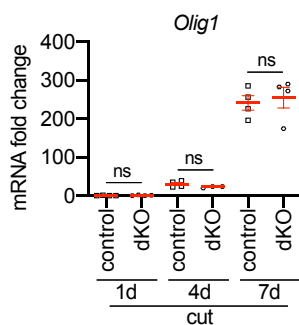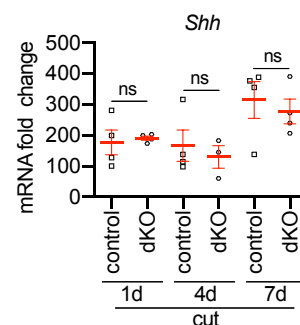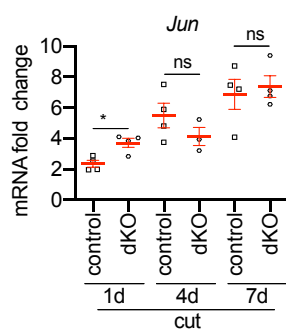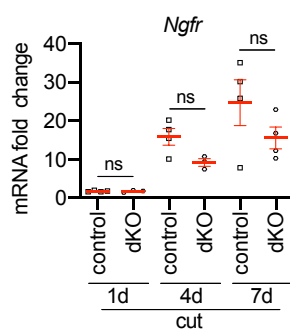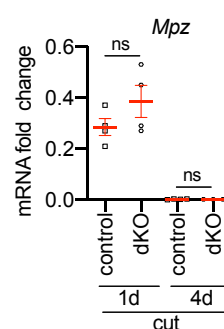

Supplement: supp [file elife-72917-supp-v1.zip]

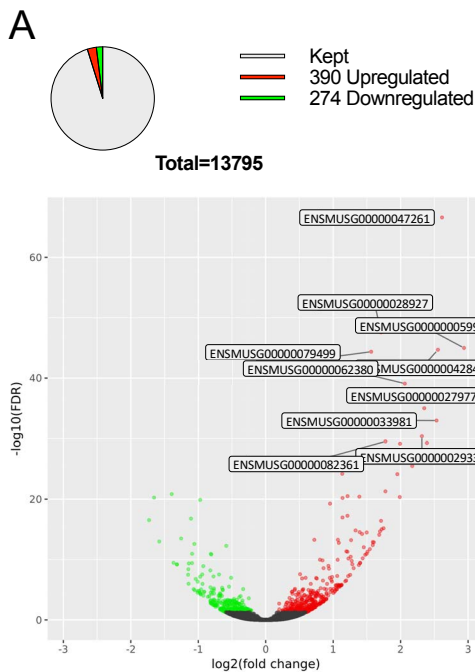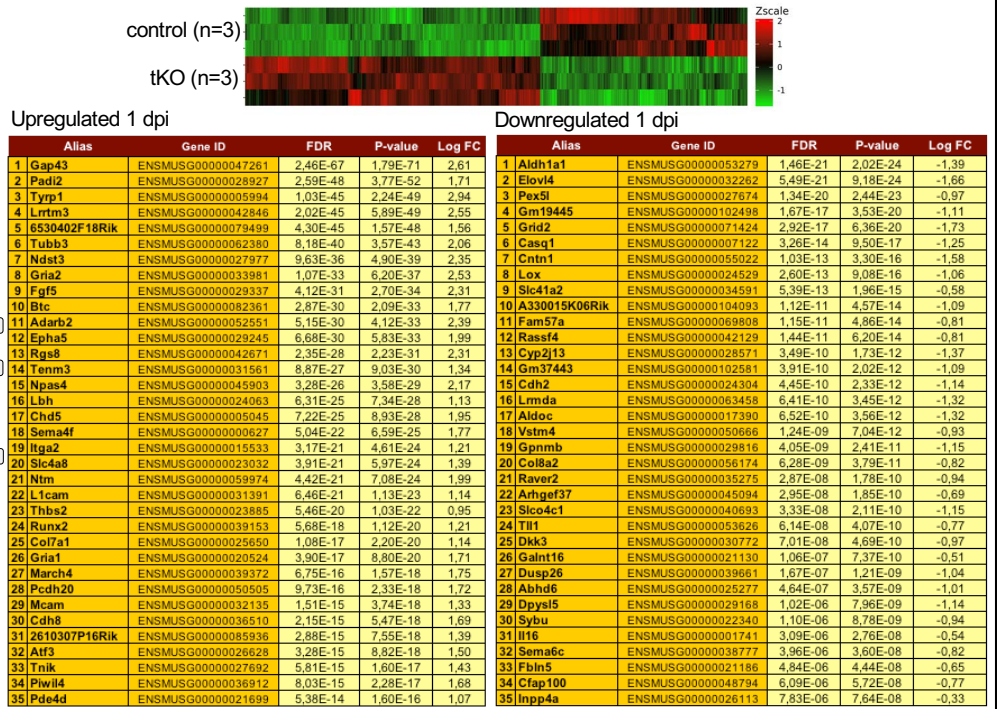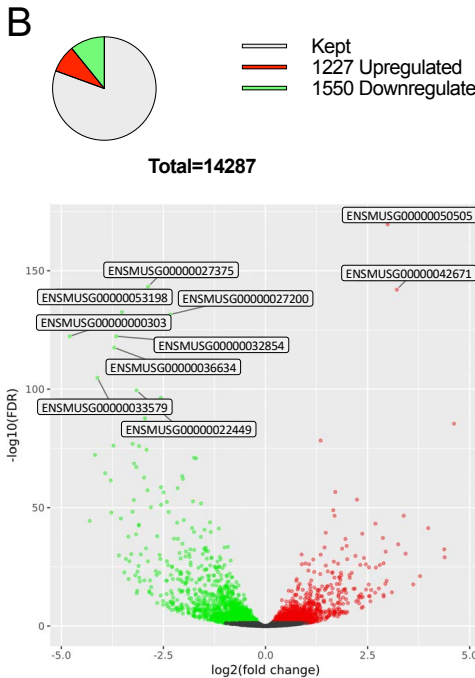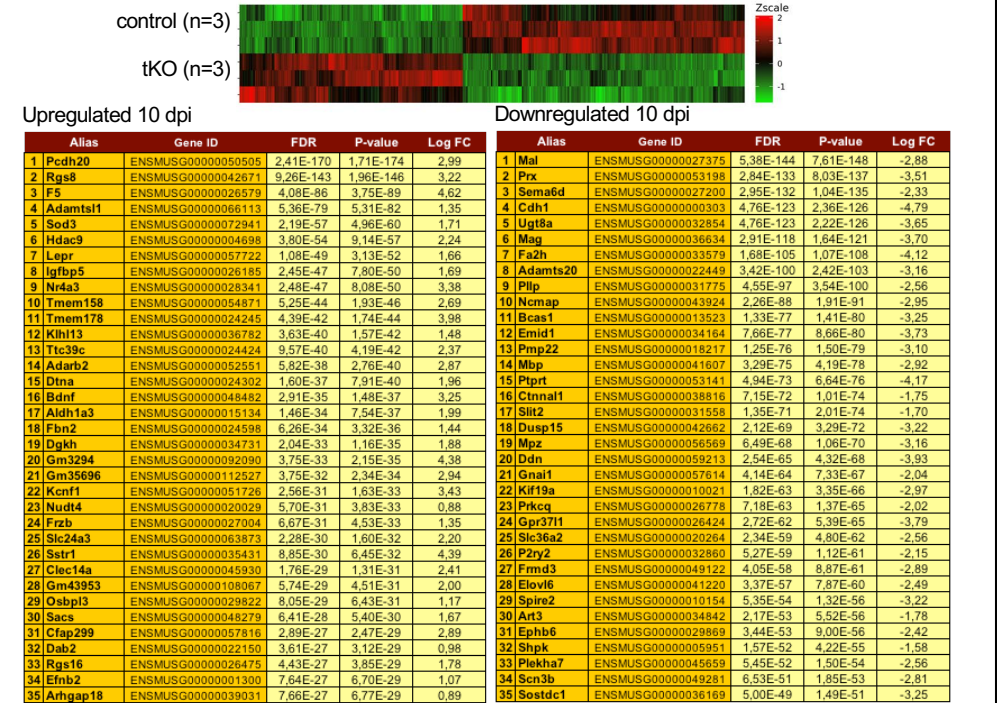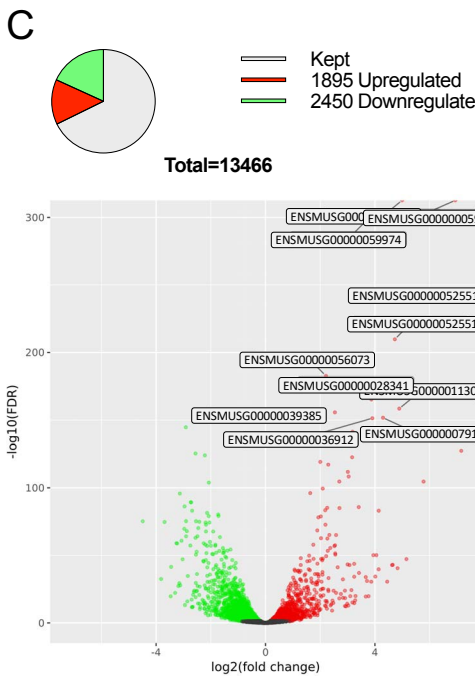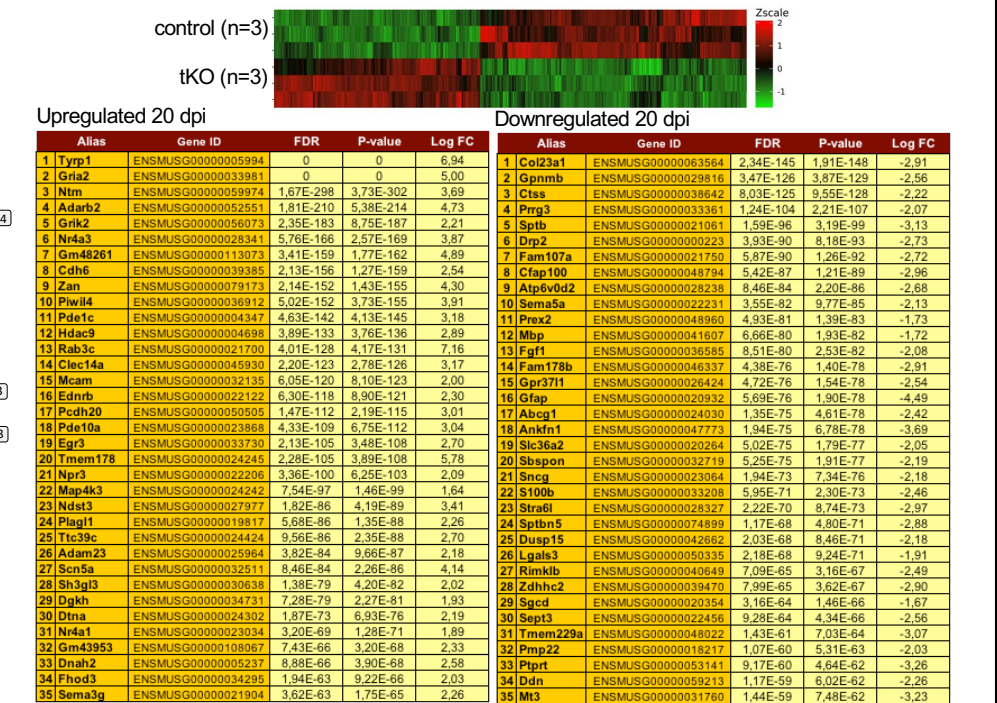

Supplement: supp [file elife-72917-supp-v1.zip]

**A**

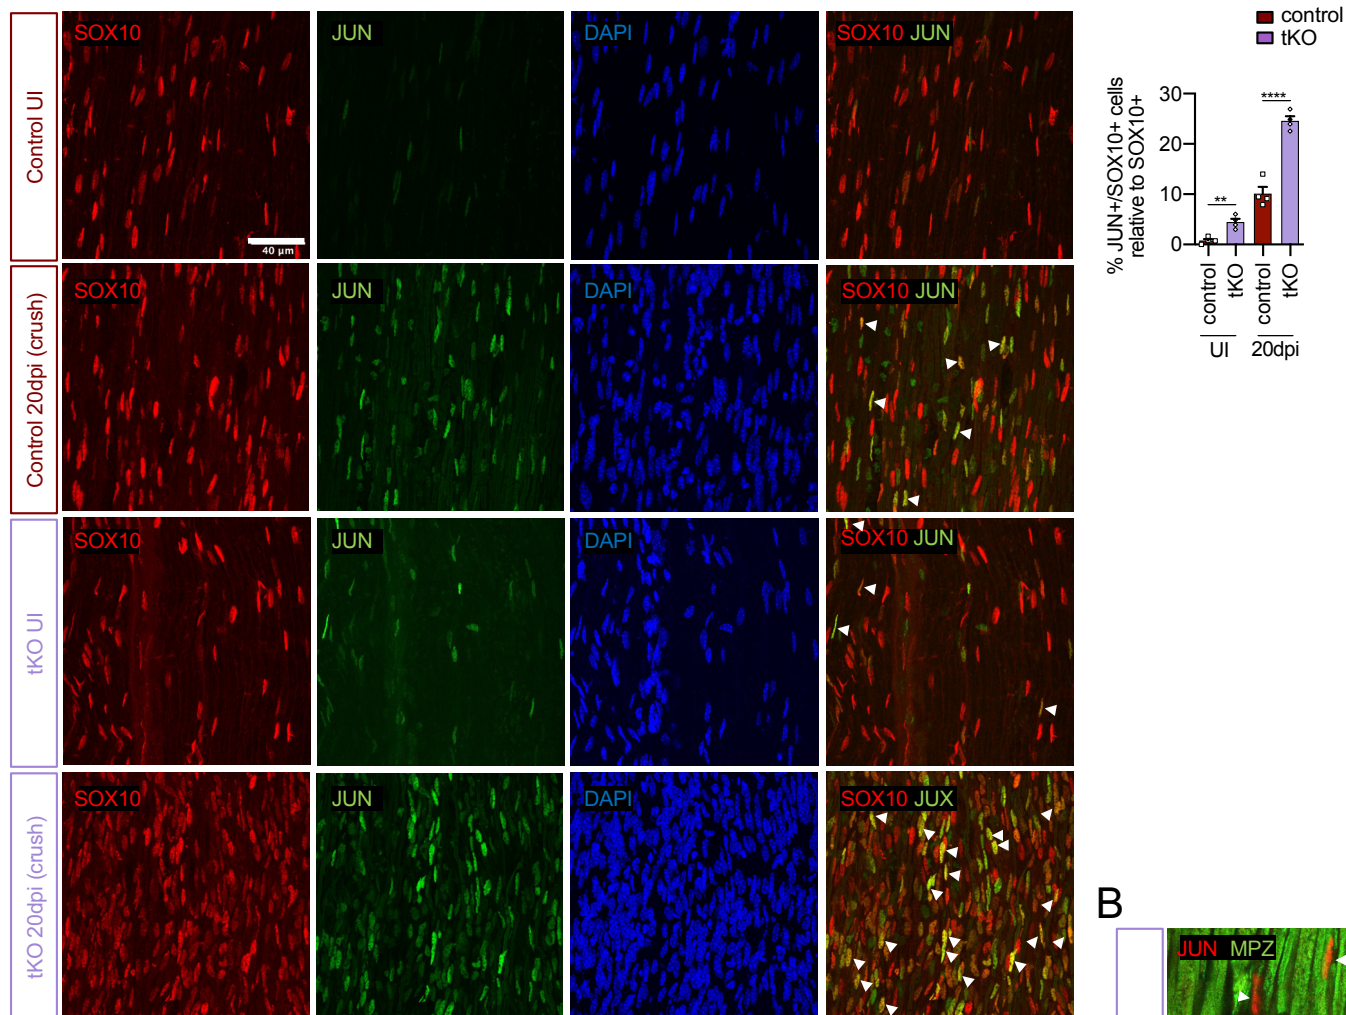

**B**

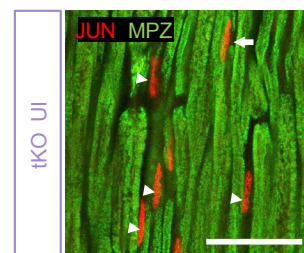

**C**

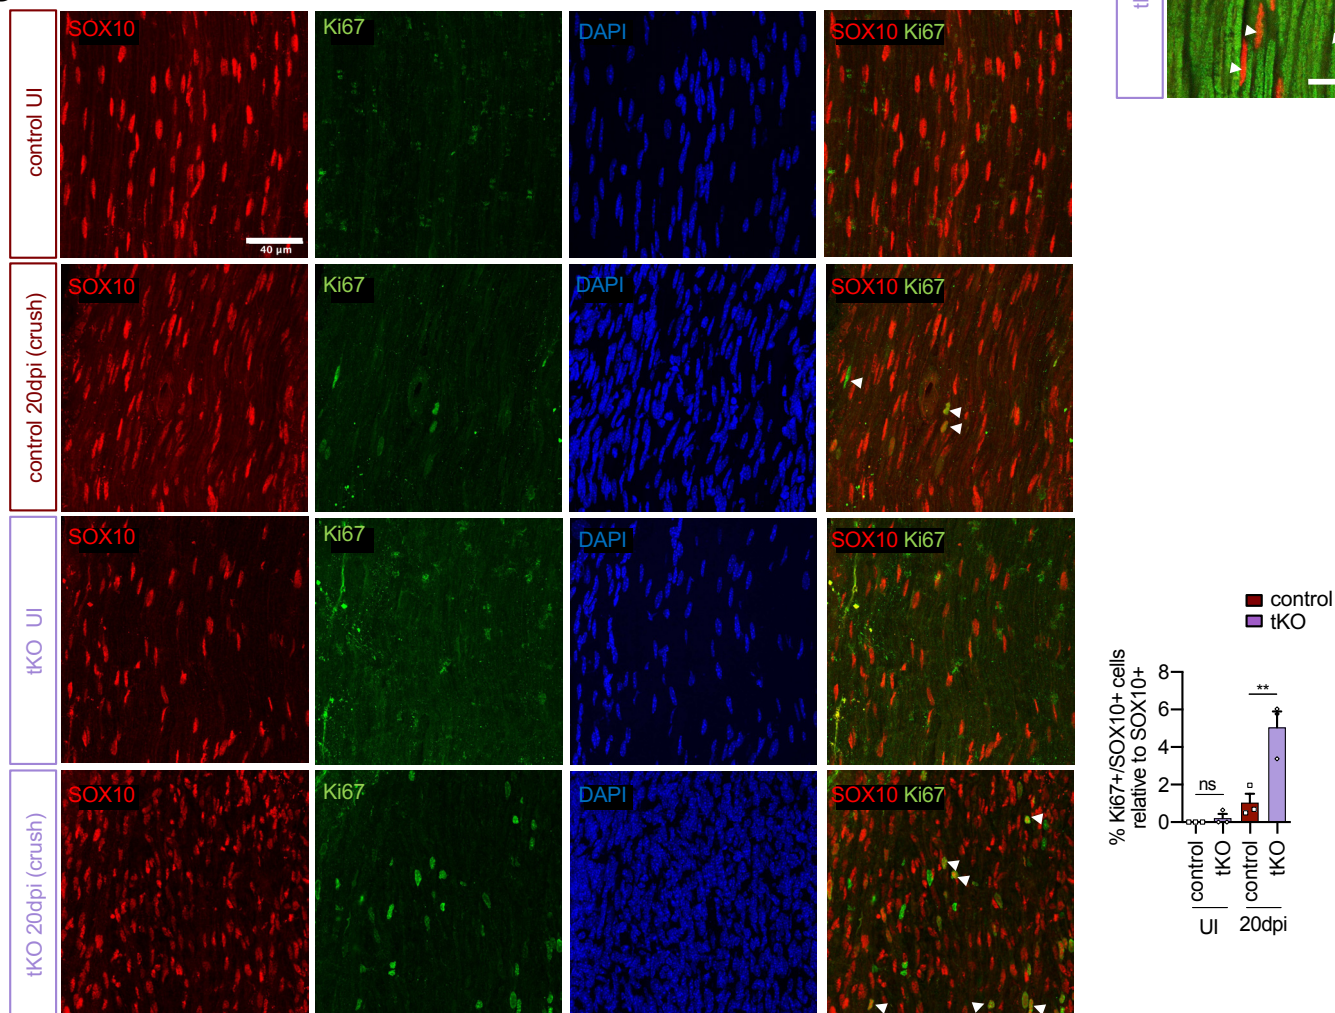

Supplement: supp [file elife-72917-supp-v1.zip]

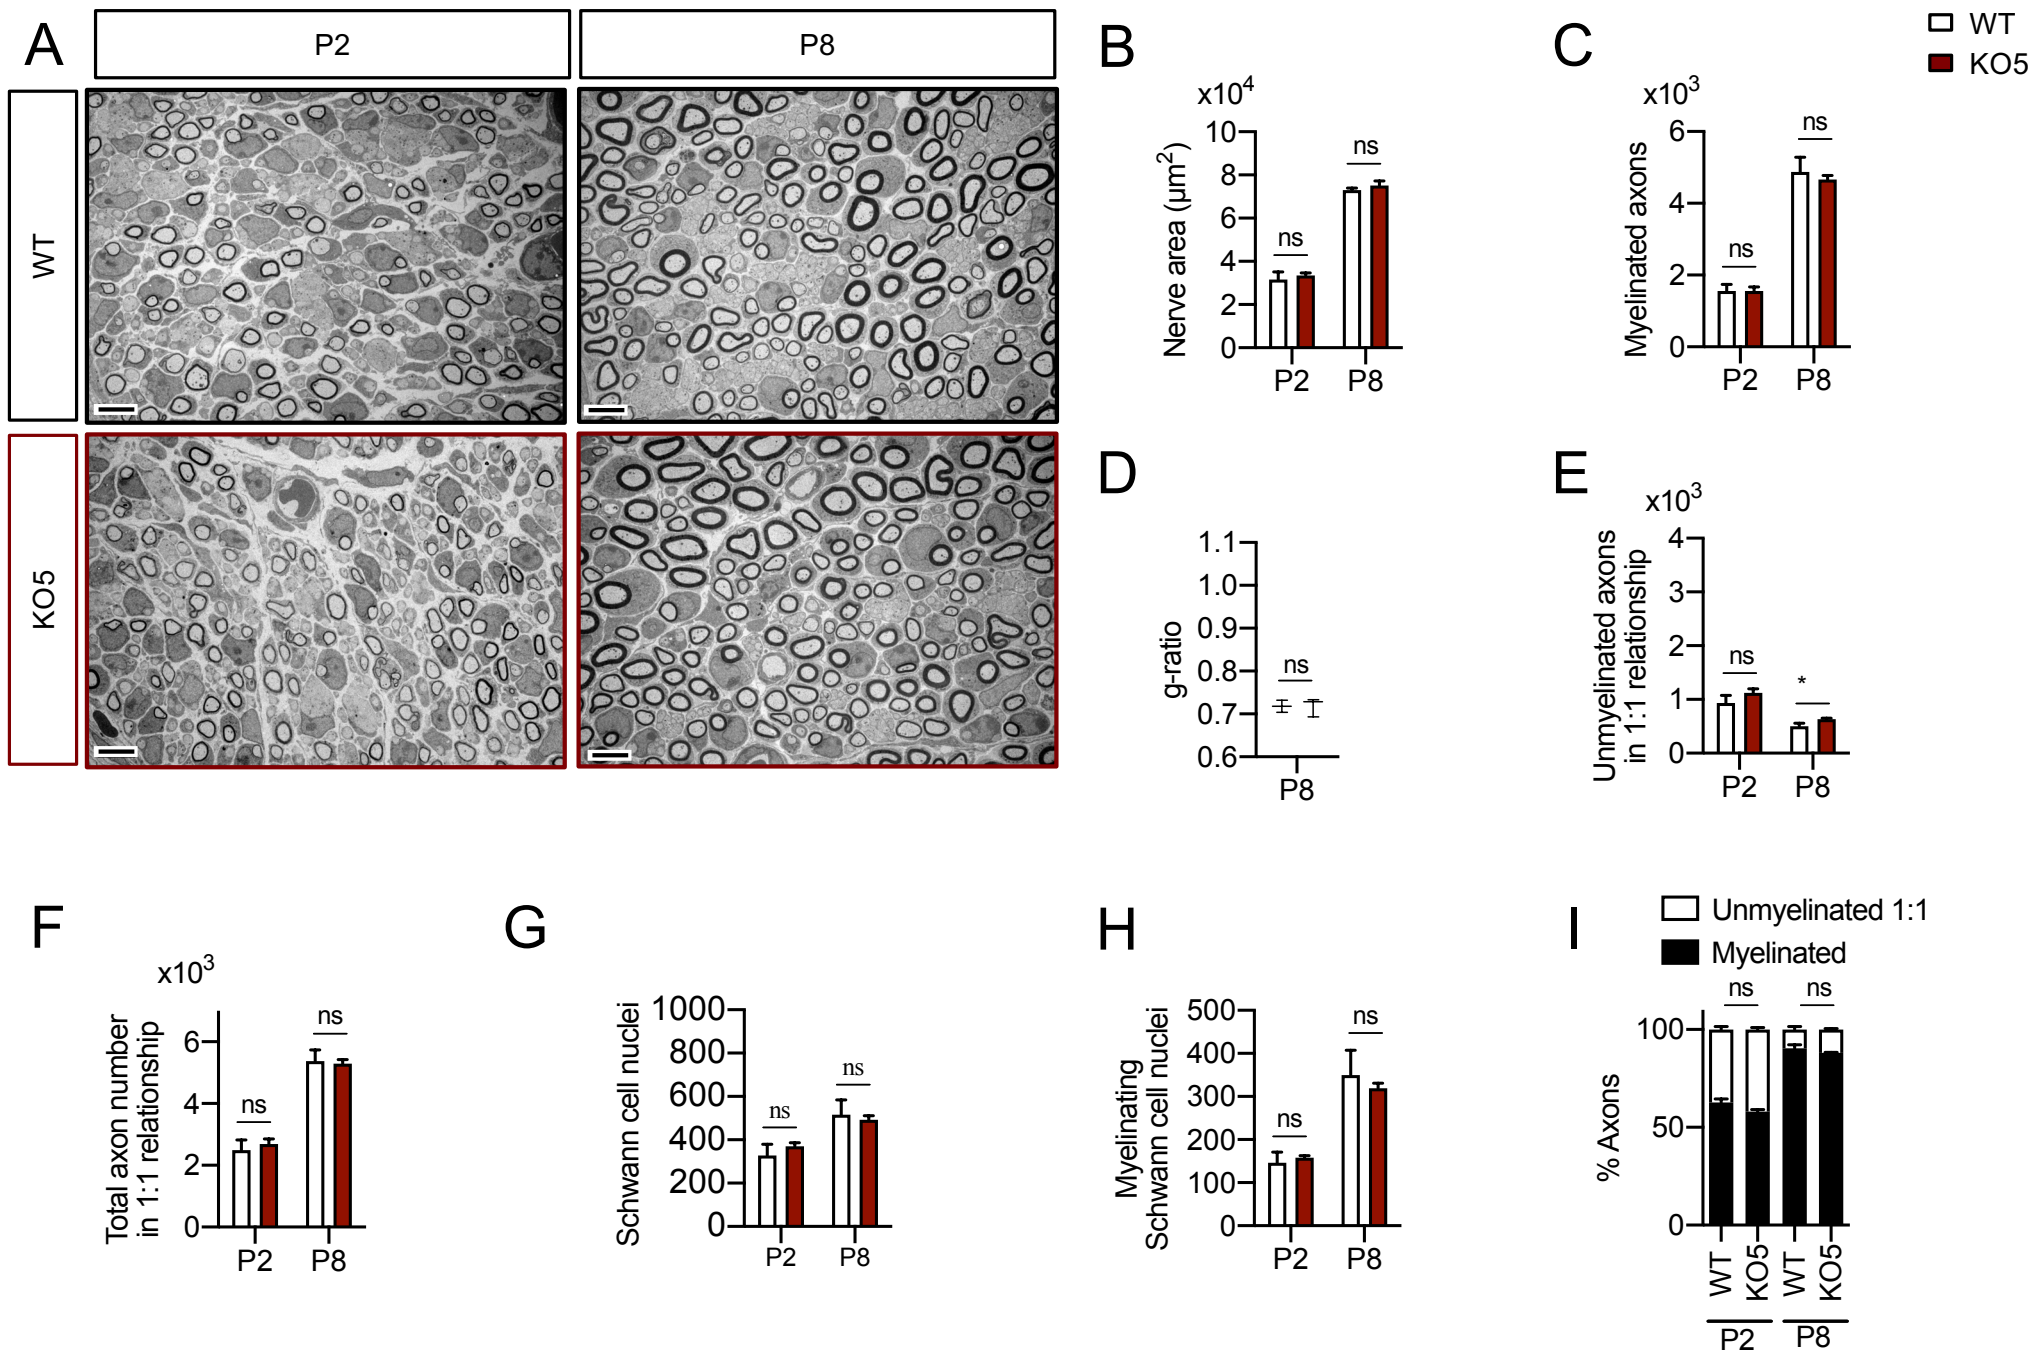

Supplement: supp [file elife-72917-supp-v1.zip]

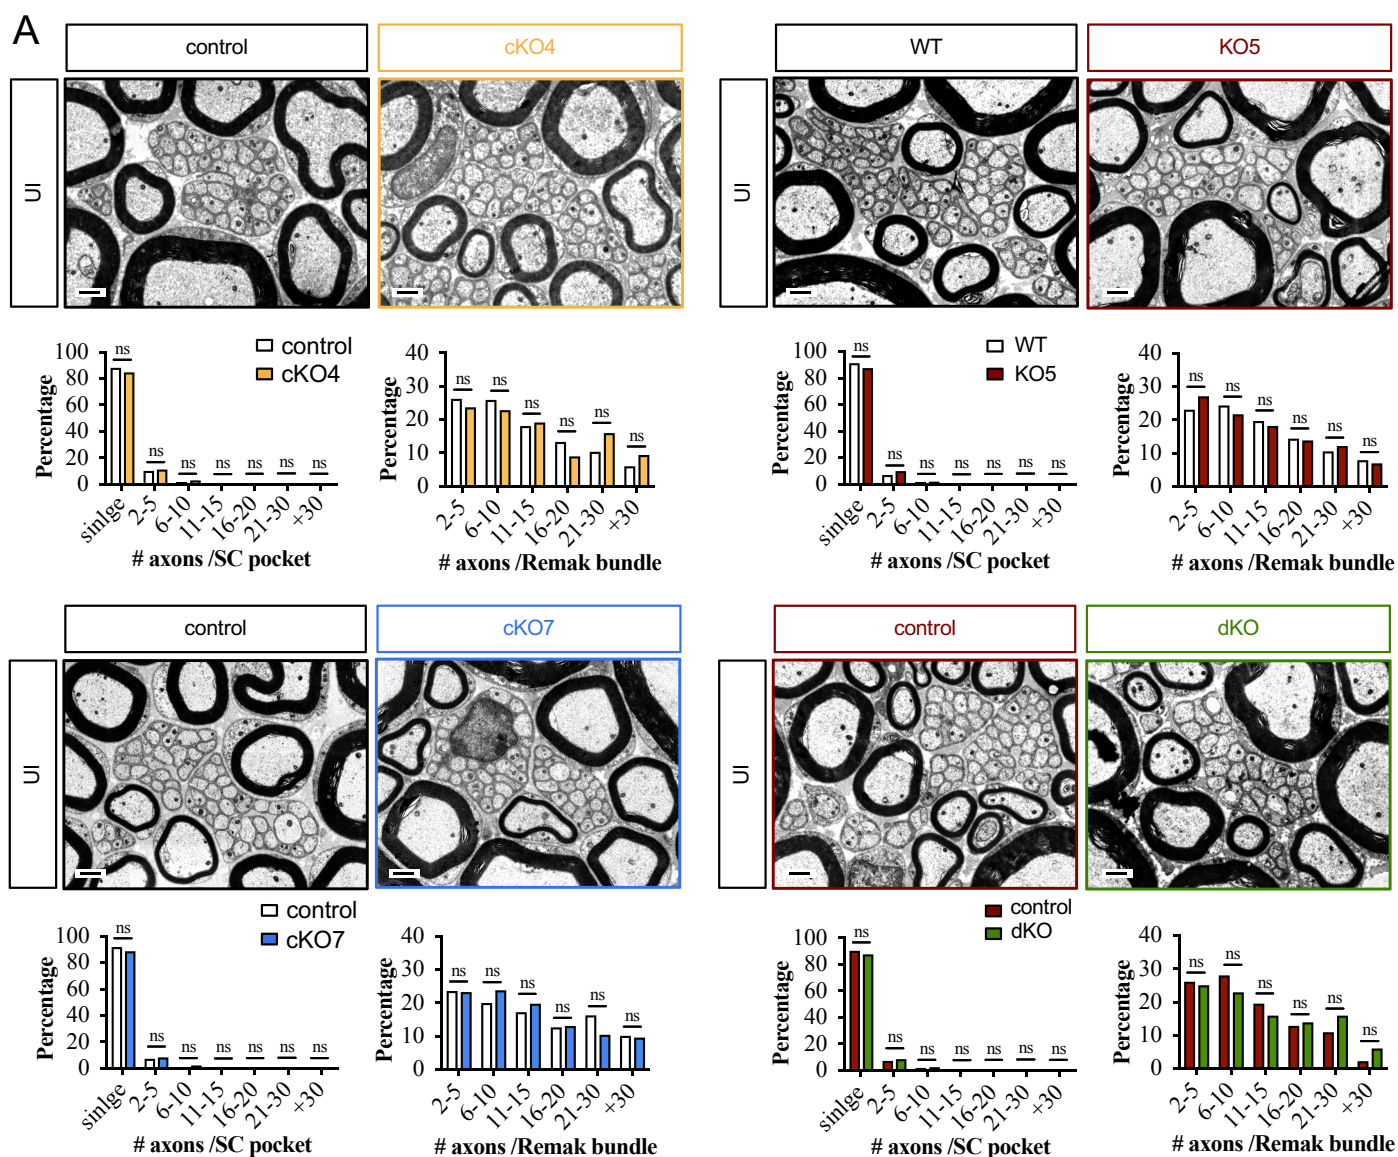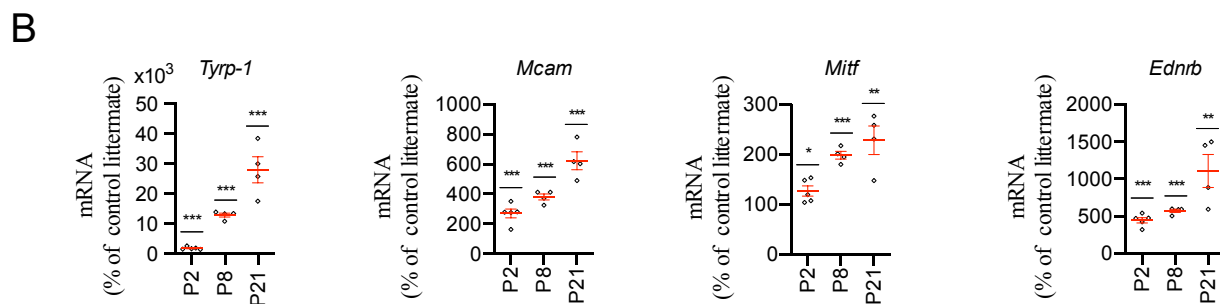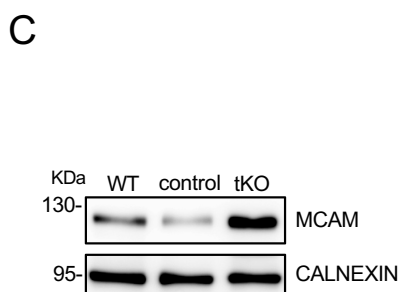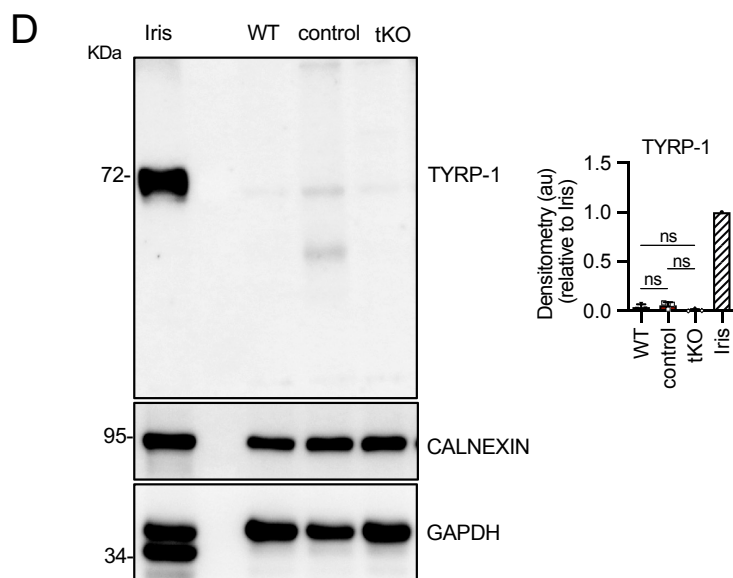

Supplement: supp [file elife-72917-supp-v1.zip]

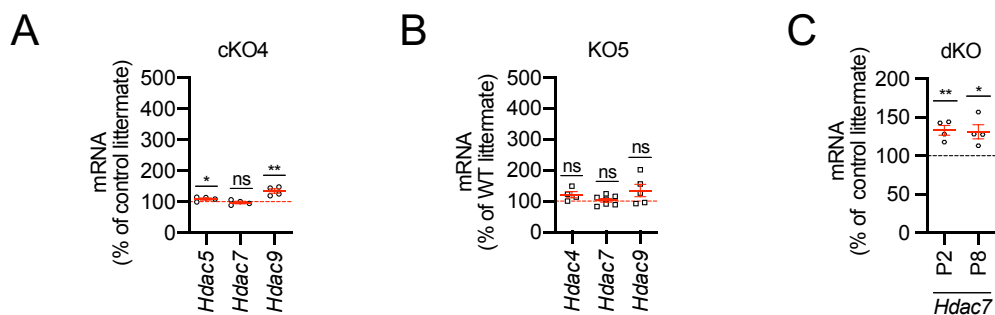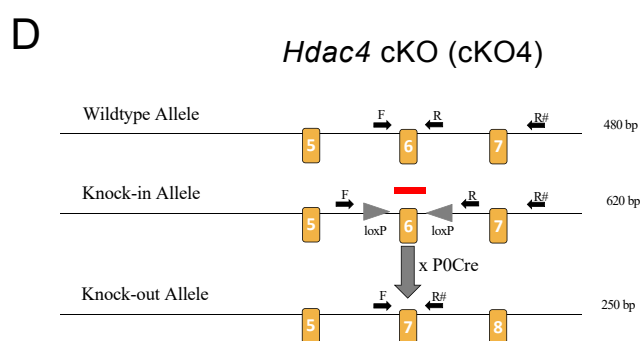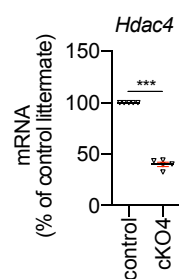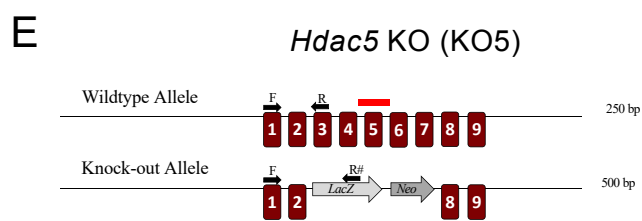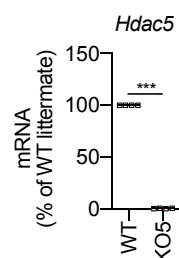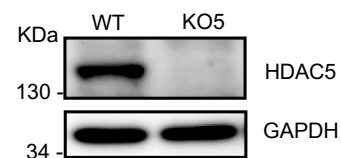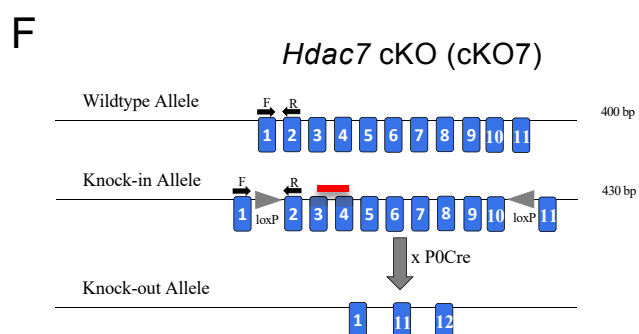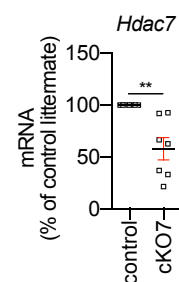

Supplement: supp [file elife-72917-supp-v1.zip]

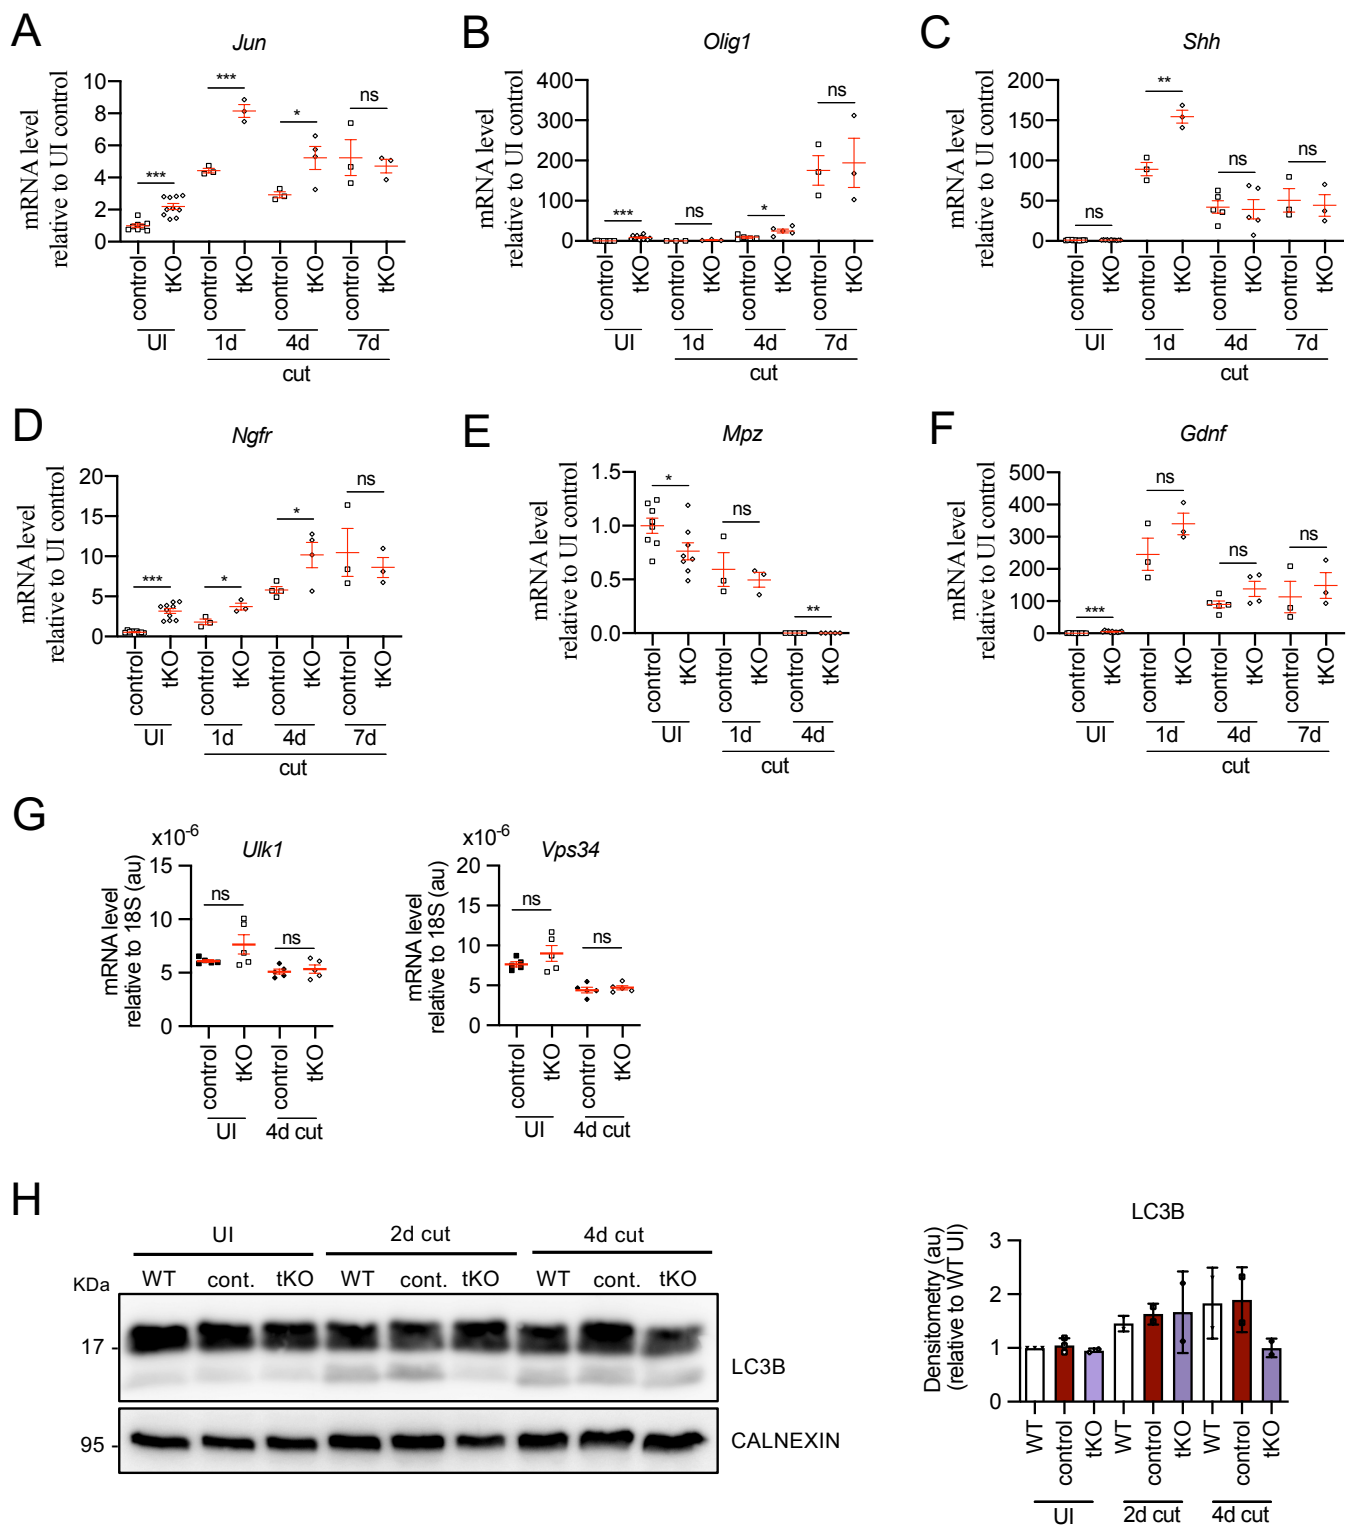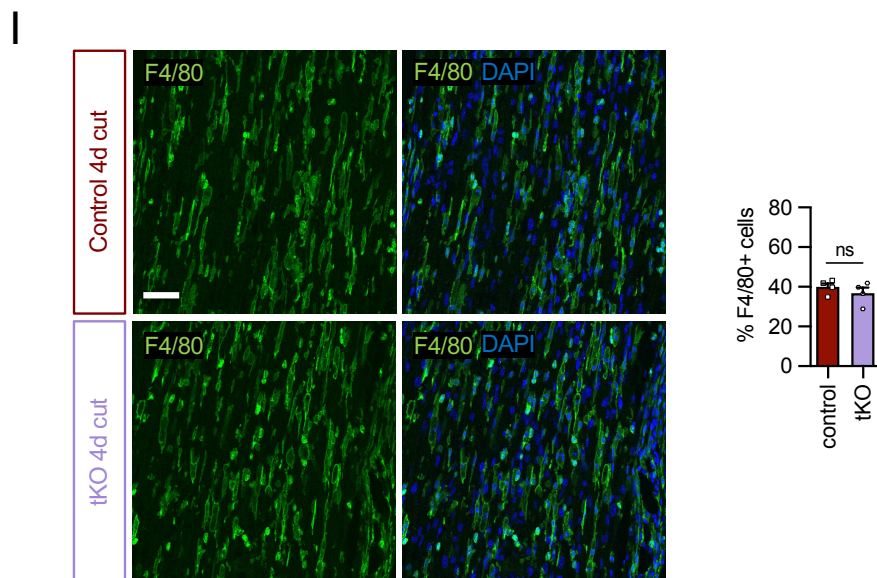

Supplement: supp [file elife-72917-supp-v1.zip]

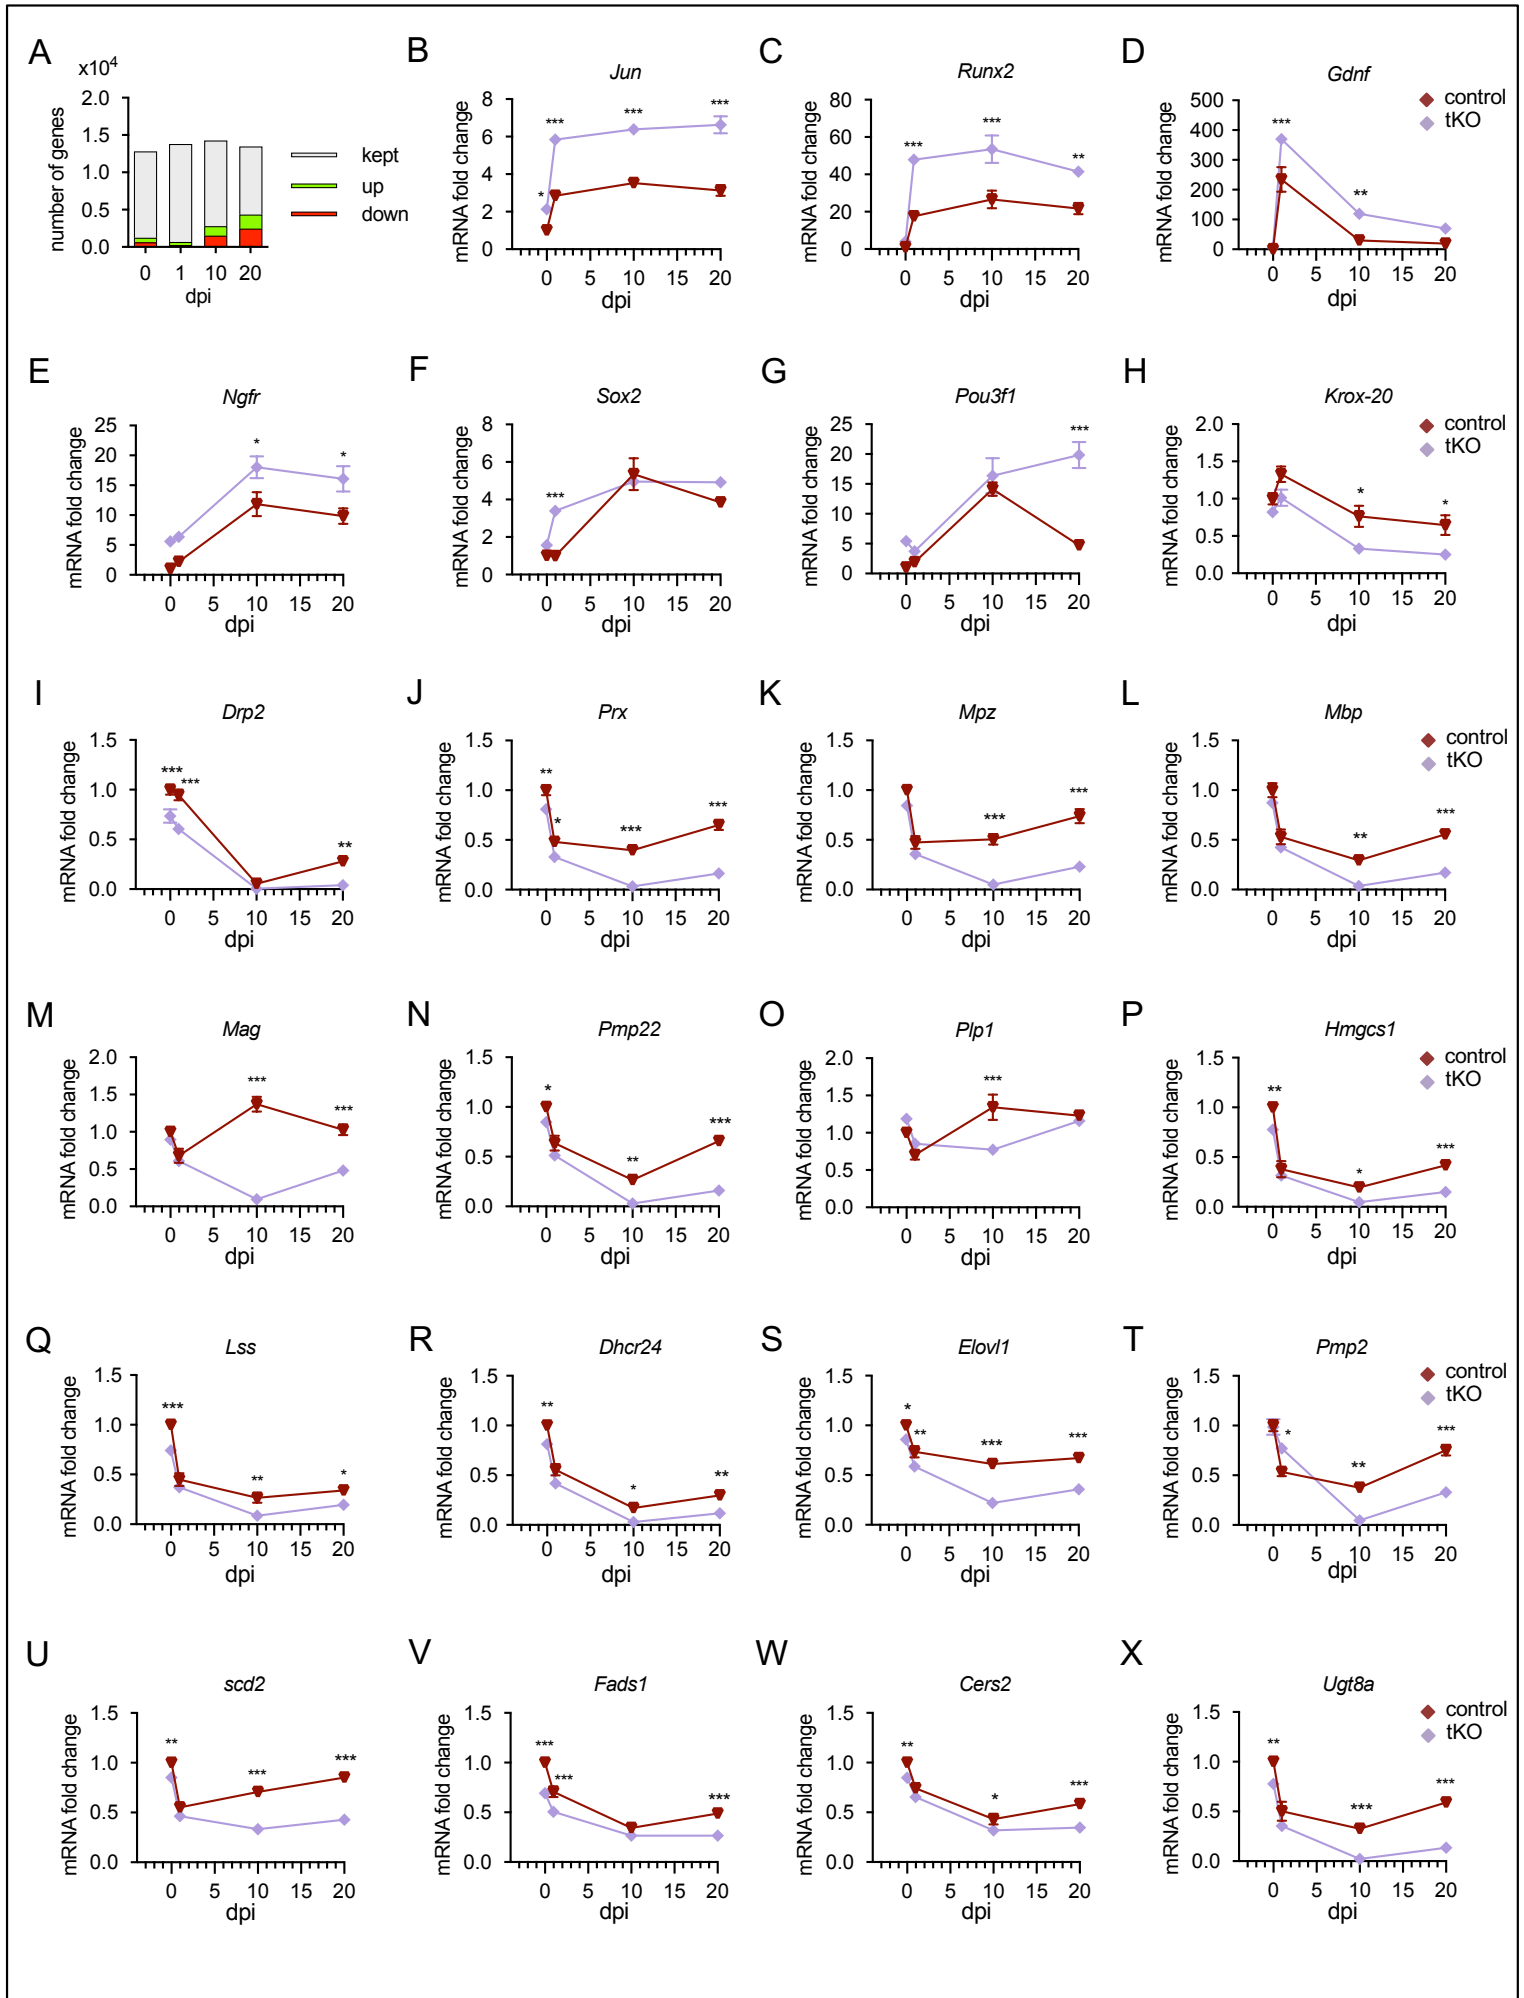

Supplement: supp [file elife-72917-supp-v1.zip]

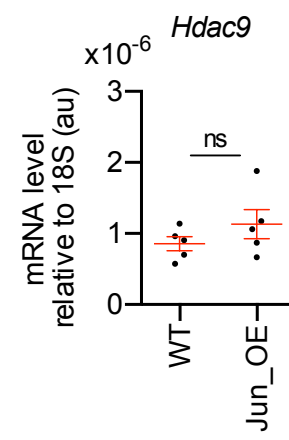

Supplement: supp [file elife-72917-supp-v1.zip]

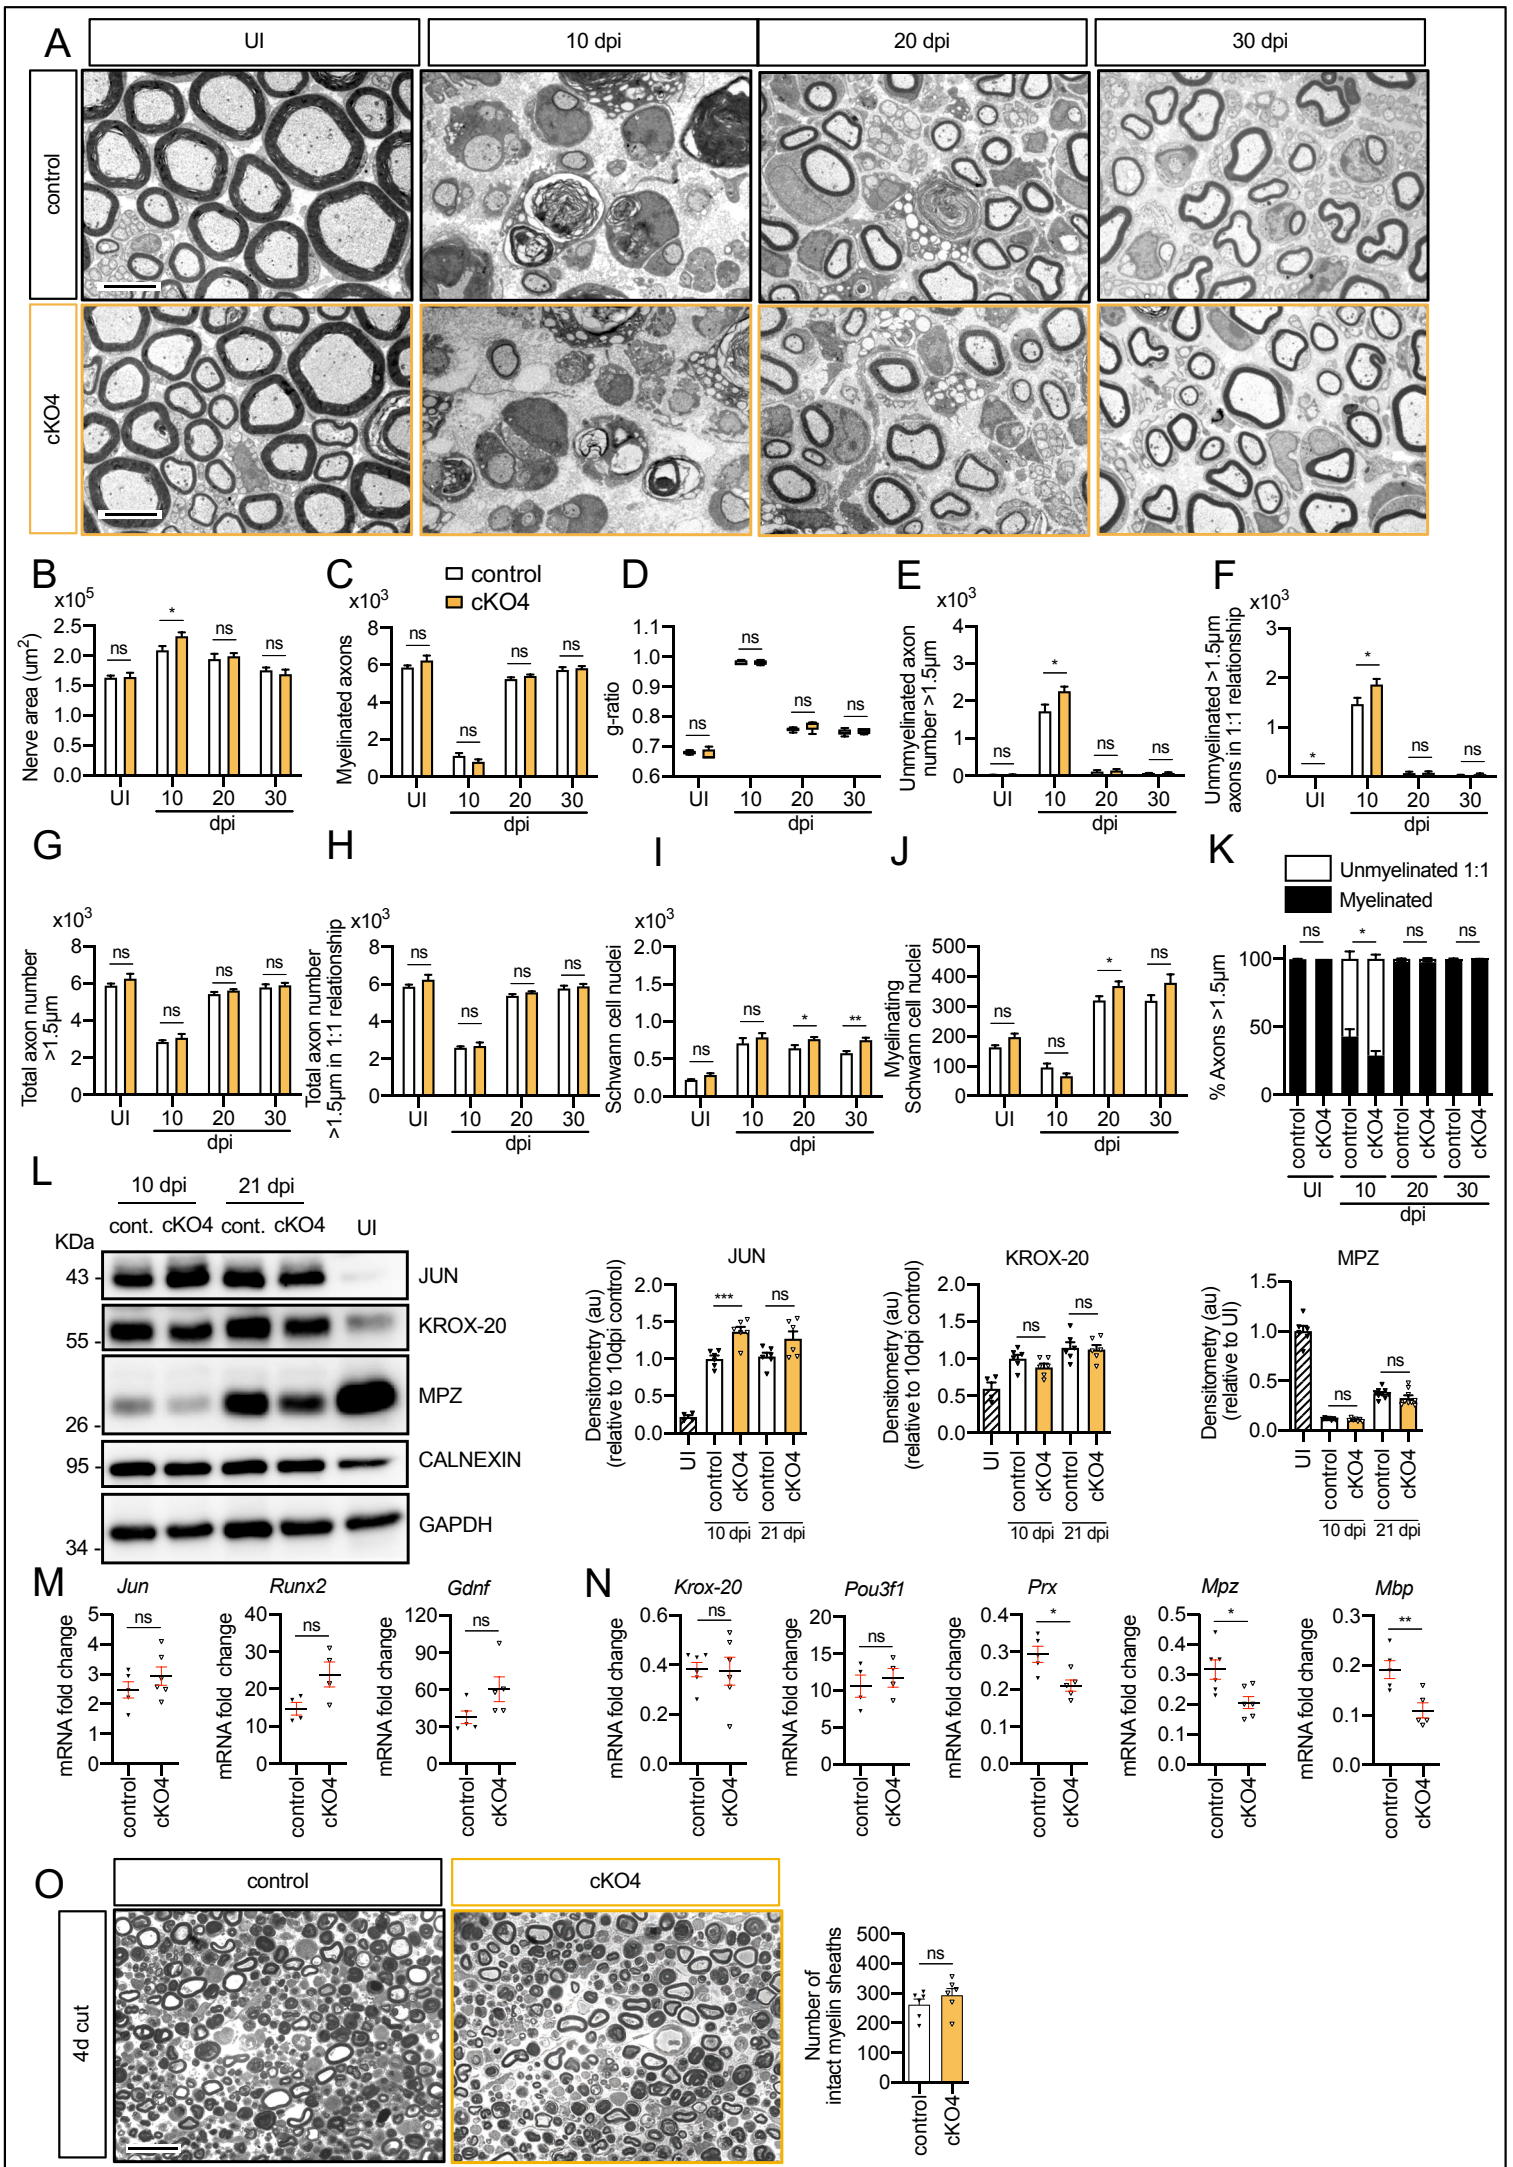

Supplement: supp [file elife-72917-supp-v1.zip]
